# Supplementary material for: Sources of biases in the in vitro testing of nanomaterials: the role of the biomolecular corona
Source: Royal Society of Chemistry journal article supplement (doi:10.1039/d3nh00510k), 2024-01-01
Supplement: d3nh00510k2.xlsx [file d3nh00510k2.xlsx]

## Sheet: GO
		Medium1h_1	Medium1h_2	Medium1h_3	Medium1h_4	Medium1h_5	Medium24h_1	Medium24h_2	Medium24h_3	Medium24h_4	Medium24h_5	Plasma_1	Plasma_2	Plasma_3	Plasma_4	Plasma_5	Medium_1	Medium_2	Medium_3	Medium_4	Medium_5
Entry	Protein name	Pre1h	Pre1h	Pre1h	Pre1h	Pre1h	Pre24h	Pre24h	Pre24h	Pre24h	Pre24h	Plasma	Plasma	Plasma	Plasma	Plasma	Medium	Medium	Medium	Medium	Medium
ALBU_BOVIN	Albumin (BSA) (allergen Bos d 6)	37579656	31097738	25406818	61650640	48770704	291517280	258504880	304789216	188525664	231495120	0	0	0	0	0	26125504	15938817	235087360	191619312	25812280
A1AT_BOVIN	Alpha-1-antiproteinase (Alpha-1-antitrypsin) (Alpha-1-proteinase inhibitor) (Serpin A1)	26553134	14095994	21338906	36841396	32597310	67363096	37540980	42145400	33737836	32305312	0	0	0	0	0	21160084	16051984	26856874	22022098	28608148
APOA1_BOVIN	Apolipoprotein A-I (Apo-AI) (ApoA-I) (Apolipoprotein A1) [Cleaved into: Proapolipoprotein A-I (ProapoA-I); Truncated apolipoprotein A-I]	13732062	10514203	15152954	14823058	21236898	17457182	13136514	18228126	11147993	17769984	0	0	0	0	0	202105264	66689456	215292144	144136128	242741600
FIBA_HUMAN	Fibrinogen alpha chain [Cleaved into: Fibrinopeptide A; Fibrinogen alpha chain]	13254686	12655193	14875120	11576951	18497644	4670034	4721106	5197692	6102354	4310606	10095422	13816732	11398342	9389256	12423663	0	0	0	0	0
VTNC_HUMAN	Vitronectin (VN) (S-protein) (Serum-spreading factor) (V75) [Cleaved into: Vitronectin V65 subunit; Vitronectin V10 subunit; Somatomedin-B]	12383006	9997711	14090759	12274291	17942636	9707504	13333559	16675391	14624840	11014838	13563760	19264770	13762043	15281653	15064783	0	0	0	0	0
ALBU_HUMAN	Albumin	7421050	3891749	6464437	8125132	11058158	7201399	8873495	11020607	35882464	15433627	38981380	39604872	9250688	6704600	7151524	0	0	0	0	0
HRG_HUMAN	Histidine-rich glycoprotein (Histidine-proline-rich glycoprotein) (HPRG)	6950567	6665928	9436562	7665234	13809601	12461398	13572400	16737100	18797992	16617731	13241885	18711134	15623156	7440948	9458074	0	0	0	0	0
FA11_HUMAN	Coagulation factor XI (FXI) (EC 3.4.21.27) (Plasma thromboplastin antecedent) (PTA) [Cleaved into: Coagulation factor XIa heavy chain; Coagulation factor XIa light chain]	6944960	7512158	7826243	5066397	8042072	3855291	10381531	7349407	9469319	13407032	21682330	16560606	14557245	12700201	17010956	0	0	0	0	0
FETUB_BOVIN	Fetuin-B	5900650	4177800	4514459	5989405	6919707	10375387	8870532	9423853	6392824	7225746	0	0	0	0	0	1430746	851269	1931950	1981092	2009846
FETUA_BOVIN	Alpha-2-HS-glycoprotein (Asialofetuin) (Fetuin-A)	5630142	5652482	5751728	15165485	15782367	37110516	14800123	19848428	11057375	12308686	0	0	0	0	0	33080606	9471163	60199868	59720524	25306026
SAA4_HUMAN	Serum amyloid A-4 protein (Constitutively expressed serum amyloid A protein) (C-SAA)	5614157	5519553	6303193	3112229	5421655	975544	1783682	2082450	2191826	1511838	4319947	5954432	5357685	5756617	7324461	0	0	0	0	0
APOA1_HUMAN	Apolipoprotein A-I (Apo-AI) (ApoA-I) (Apolipoprotein A1) [Cleaved into: Proapolipoprotein A-I (ProapoA-I); Truncated apolipoprotein A-I (Apolipoprotein A-I(1-242))]	4731100	4275835	7056719	6065222	8381304	3255437	3286366	3956554	4435666	3377538	5888654	10254378	8850688	5255060	6448608	0	0	0	0	0
A2MG_BOVIN	Alpha-2-macroglobulin (Alpha-2-M)	4058619	3626450	3775976	3973818	4310948	8471456	5348839	5372011	4884184	5102446	0	0	0	0	0	53049964	23995280	49989148	93345160	77289384
TRFE_BOVIN	Serotransferrin (Transferrin) (Beta-1 metal-binding globulin) (Siderophilin)	3282596	2373562	2308186	3645742	4255502	12651367	11213888	11776427	6313799	10432281	0	0	0	0	0	321092	281680	501656	665296	461855
KNG1_HUMAN	Kininogen-1 (Alpha-2-thiol proteinase inhibitor) (Fitzgerald factor) (High molecular weight kininogen) (HMWK) (Williams-Fitzgerald-Flaujeac factor) [Cleaved into: Kininogen-1 heavy chain; T-kinin (Ile-Ser-Bradykinin); Bradykinin (Kallidin I); Lysyl-bradykinin (Kallidin II); Kininogen-1 light chain; Low molecular weight growth-promoting factor]	2870913	3056121	3402640	2832260	4320843	4104014	4679406	5070053	5765851	3359069	3653173	4433369	2852087	3049478	5854585	0	0	0	0	0
APOA2_BOVIN	Apolipoprotein A-II (Apo-AII) (ApoA-II) (Antimicrobial peptide BAMP-1) (Apolipoprotein A2) [Cleaved into: Proapolipoprotein A-II (ProapoA-II); Truncated apolipoprotein A-II (Apolipoprotein A-II(1-76))]	2860341	2043012	2444944	1390983	3494157	2404438	2003687	1643157	1732915	2198915	0	0	0	0	0	6493724	1826990	9877124	3960505	3896375
ITIH4_HUMAN	Inter-alpha-trypsin inhibitor heavy chain H4 (ITI heavy chain H4) (ITI-HC4) (Inter-alpha-inhibitor heavy chain 4) (Inter-alpha-trypsin inhibitor family heavy chain-related protein) (IHRP) (Plasma kallikrein sensitive glycoprotein 120) (Gp120) (PK-120) [Cleaved into: 70 kDa inter-alpha-trypsin inhibitor heavy chain H4; 35 kDa inter-alpha-trypsin inhibitor heavy chain H4]	2761505	2636672	2728228	2102521	3483663	443784	502561	495239	670311	478593	4912637	4345427	4797355	3438963	4952726	0	0	0	0	0
HEMO_BOVIN	Hemopexin	2734312	1841714	2051393	3027736	3264952	6542804	4760411	5008341	3887923	4423853	0	0	0	0	0	551898	422392	1811913	1527052	739734
APOE_HUMAN	Apolipoprotein E (Apo-E)	2355958	2663646	2667008	1781062	2419893	1068774	1490154	1374404	1444157	1465137	6310627	4923889	5502144	5736522	5446663	0	0	0	0	0
K2C1_HUMAN	Keratin, type II cytoskeletal 1 (67 kDa cytokeratin) (Cytokeratin-1) (CK-1) (Hair alpha protein) (Keratin-1) (K1) (Type-II keratin Kb1)	2132021	2692581	2232552	1160280	1799266	1542405	2284405	1825671	3420912	1477124	4370202	3981896	2941254	3060190	3296969	0	0	0	0	0
A1BG_BOVIN	Alpha-1B-glycoprotein (Alpha-1-B glycoprotein)	1738567	1837620	1498243	2149850	2025929	3793356	3512785	3049081	2429798	2876846	0	0	0	0	0	132134	105714	205343	163606	180335
IGHG1_HUMAN	Immunoglobulin heavy constant gamma 1 (Ig gamma-1 chain C region) (Ig gamma-1 chain C region EU) (Ig gamma-1 chain C region KOL) (Ig gamma-1 chain C region NIE)	1609099	4293302	4910103	5454276	4879725	2323728	2497141	1324595	2515676	1508305	4307162	5933425	1715468	2325766	1449954	0	0	0	0	0
ITIH1_BOVIN	Inter-alpha-trypsin inhibitor heavy chain H1 (ITI heavy chain H1) (ITI-HC1) (Inter-alpha-inhibitor heavy chain 1)	1478481	1206027	1168249	943867	1026148	2104640	1471137	1012719	1163762	1076891	0	0	0	0	0	4069327	1543267	3105228	4606640	7568138
TTHY_BOVIN	Transthyretin (Prealbumin)	1412189	1146493	1436536	1244238	1318532	2216624	2002402	2141993	1929100	2105755	0	0	0	0	0	2460096	2102177	3213994	2095910	3454221
HBA_BOVIN	Hemoglobin subunit alpha (Alpha-globin) (Hemoglobin alpha chain) [Cleaved into: Hemopressin]	1260914	1840105	1605792	1436398	1706905	1321197	1334281	1843527	1570598	1750634	0	0	0	0	0	13420569	5952682	22109776	14015678	12475141
A2AP_BOVIN	Alpha-2-antiplasmin (Alpha-2-AP) (Alpha-2-plasmin inhibitor) (Alpha-2-PI) (Serpin F2)	1255407	1043124	1011543	874909	1007086	1239136	1172026	1102536	955232	1099111	0	0	0	0	0	1043696	885219	1530117	1183931	1183086
ITIH2_HUMAN	Inter-alpha-trypsin inhibitor heavy chain H2 (ITI heavy chain H2) (ITI-HC2) (Inter-alpha-inhibitor heavy chain 2) (Inter-alpha-trypsin inhibitor complex component II) (Serum-derived hyaluronan-associated protein) (SHAP)	1203266	977421	1371593	1486276	1464167	811717	784707	976080	1181533	884746	1110138	1226209	1016828	822553	815690	0	0	0	0	0
FIBB_HUMAN	Fibrinogen beta chain [Cleaved into: Fibrinopeptide B; Fibrinogen beta chain]	1181077	1484788	1819915	1292164	2333378	496277	609772	773668	1076241	565419	2653418	3508227	2946626	2295725	2467365	0	0	0	0	0
APOC4_HUMAN	Apolipoprotein C-IV (Apo-CIV) (ApoC-IV) (Apolipoprotein C4)	1179326	1071915	1204705	1058671	1589568	1215872	1408871	1607621	1866693	1227641	2269931	2239403	2371186	1538019	2268335	0	0	0	0	0
APOA4_HUMAN	Apolipoprotein A-IV (Apo-AIV) (ApoA-IV) (Apolipoprotein A4)	1147673	1047848	1403578	914419	1306764	371597	429936	438533	606603	463898	1368292	1308894	1458597	1360270	1401770	0	0	0	0	0
APOC1_HUMAN	Apolipoprotein C-I (Apo-CI) (ApoC-I) (Apolipoprotein C1) [Cleaved into: Truncated apolipoprotein C-I]	1129319	876799	1246514	733431	1543850	152727	172517	185833	230493	197254	892163	1130836	1258286	523956	1399260	0	0	0	0	0
IGHM_HUMAN	Immunoglobulin heavy constant mu (Ig mu chain C region) (Ig mu chain C region BOT) (Ig mu chain C region GAL) (Ig mu chain C region OU)	1115373	1062993	1400684	1004982	1146625	353147	577036	559876	1008073	546130	3871835	4068793	3418684	3354603	4231430	0	0	0	0	0
VTDB_BOVIN	Vitamin D-binding protein (DBP) (VDB) (Gc-globulin) (Group-specific component)	1056465	726057	627732	996642	1154499	2576393	1866522	1822936	1722020	2117781	0	0	0	0	0	1273190	694090	5355043	4488632	1513175
APOH_BOVIN	Beta-2-glycoprotein 1 (Apolipoprotein H) (Apo-H) (Beta-2-glycoprotein I) (B2GPI) (Beta(2)GPI)	1026729	951374	892375	1045090	1024725	1312117	1873748	1464146	1127029	1743101	0	0	0	0	0	1517724	1456117	27316112	32109536	1574838
K1C13_HUMAN	Keratin, type I cytoskeletal 13 (Cytokeratin-13) (CK-13) (Keratin-13) (K13)	986238	450618	202007	1169329	572192	1312730	327612	238071	250203	286919	1068514	257478	339311	338800	371976	0	0	0	0	0
HBBF_BOVIN	Hemoglobin fetal subunit beta (Beta-globin, fetal) (Hemoglobin beta chain, fetal) (Hemoglobin gamma chain)	919411	898652	849217	1445463	1439897	3652146	2717649	2667507	2701874	2796779	0	0	0	0	0	57165468	30676638	137475408	90882248	39568272
APOB_HUMAN	Apolipoprotein B-100 (Apo B-100) [Cleaved into: Apolipoprotein B-48 (Apo B-48)]	909389	1071881	1331385	972624	1290344	1012654	918838	1764467	1270731	1693648	903375	1369337	1420512	812940	1125499	0	0	0	0	0
FA12_HUMAN	Coagulation factor XII (EC 3.4.21.38) (Hageman factor) (HAF) [Cleaved into: Coagulation factor XIIa heavy chain; Beta-factor XIIa part 1; Coagulation factor XIIa light chain (Beta-factor XIIa part 2)]	826251	1141104	969793	970746	1117163	1313128	2733634	2711595	3282158	2043677	2024108	1788651	1322471	972006	2085269	0	0	0	0	0
IGHG2_HUMAN	Immunoglobulin heavy constant gamma 2 (Ig gamma-2 chain C region) (Ig gamma-2 chain C region DOT) (Ig gamma-2 chain C region TIL) (Ig gamma-2 chain C region ZIE)	823508	724218	1391543	1016287	953692	238974	417342	390812	843335	384992	1363883	2012921	900914	868702	927686	0	0	0	0	0
FETA_BOVIN	Alpha-fetoprotein (Alpha-1-fetoprotein) (Alpha-fetoglobulin)	793919	695823	672306	1059379	981486	4759091	2373062	2766373	2207781	2391839	0	0	0	0	0	479696	424296	1619419	1743691	557743
ADIPO_BOVIN	Adiponectin (30 kDa adipocyte complement-related protein) (Adipocyte complement-related 30 kDa protein) (ACRP30) (Adipocyte, C1q and collagen domain-containing protein) (Adipose most abundant gene transcript 1 protein) (apM-1)	751922	474438	611772	783990	889101	1618563	1008852	1097042	922268	945047	0	0	0	0	0	261140	135313	226132	261441	423201
APOA_HUMAN	Apolipoprotein(a) (Apo(a)) (Lp(a)) (EC 3.4.21.-)	751210	891634	1227195	606923	921729	1126094	1395312	3207537	2261838	3948740	1225088	1528791	1356400	1108212	1190403	0	0	0	0	0
K22E_HUMAN	Keratin, type II cytoskeletal 2 epidermal (Cytokeratin-2e) (CK-2e) (Epithelial keratin-2e) (Keratin-2 epidermis) (Keratin-2e) (K2e) (Type-II keratin Kb2)	719025	1076958	1199560	431760	633393	561766	1079575	736440	1365660	631790	1367371	2186429	1114429	1100728	1213118	0	0	0	0	0
K1C9_HUMAN	Keratin, type I cytoskeletal 9 (Cytokeratin-9) (CK-9) (Keratin-9) (K9)	688075	957434	697722	508785	651195	670537	804953	640308	1788291	385041	1798446	1709332	1949676	1692989	1440349	0	0	0	0	0
A1AG_BOVIN	Alpha-1-acid glycoprotein (Orosomucoid) (OMD)	673678	495161	540879	654712	772005	2457641	605155	737166	613511	708288	0	0	0	0	0	536799	329502	868563	717505	540006
IBP3_HUMAN	Insulin-like growth factor-binding protein 3 (IBP-3) (IGF-binding protein 3) (IGFBP-3)	665019	703193	931628	314285	1517326	524052	550318	702181	856294	575520	1510811	1573687	1717071	1056307	1631619	0	0	0	0	0
SEPP1_HUMAN	Selenoprotein P (SeP)	657875	642056	712997	384287	557306	228198	421053	336876	441076	499306	1094017	1055687	1159432	1474756	1269281	0	0	0	0	0
APOA2_HUMAN	Apolipoprotein A-II (Apo-AII) (ApoA-II) (Apolipoprotein A2) [Cleaved into: Proapolipoprotein A-II (ProapoA-II); Truncated apolipoprotein A-II (Apolipoprotein A-II(1-76))]	644692	750448	728817	608420	697232	279771	505874	460425	497246	448083	1644609	1351535	1710488	1884047	1811302	0	0	0	0	0
IGHA1_HUMAN	Immunoglobulin heavy constant alpha 1 (Ig alpha-1 chain C region) (Ig alpha-1 chain C region BUR) (Ig alpha-1 chain C region TRO)	537421	757252	743673	925296	944233	421318	592215	481265	562587	474696	620529	911439	157240	231811	194740	0	0	0	0	0
CADH1_HUMAN	Cadherin-1 (CAM 120/80) (Epithelial cadherin) (E-cadherin) (Uvomorulin) (CD antigen CD324) [Cleaved into: E-Cad/CTF1; E-Cad/CTF2; E-Cad/CTF3]	532198	550204	565793	316327	513183	391285	709324	593788	690420	820432	1175158	1196665	1100509	1054074	1192180	0	0	0	0	0
KNG1_BOVIN	Kininogen-1 (Kininogen I) (Thiol proteinase inhibitor) [Cleaved into: Kininogen-1 heavy chain; Bradykinin (Kallidin I); Lysyl-bradykinin (Kallidin II); Kininogen-1 light chain]	527805	504406	418106	707258	599222	1753643	1452864	1327458	1336482	1525132	0	0	0	0	0	1145378	436902	5029298	5552859	1073554
K1C10_HUMAN	Keratin, type I cytoskeletal 10 (Cytokeratin-10) (CK-10) (Keratin-10) (K10)	502979	693486	580130	412861	474814	418467	631634	553250	679368	446341	623997	868905	549753	464083	639490	0	0	0	0	0
PLMN_HUMAN	Plasminogen (EC 3.4.21.7) [Cleaved into: Plasmin heavy chain A; Activation peptide; Angiostatin; Plasmin heavy chain A, short form; Plasmin light chain B]	491537	392615	540922	394749	544178	395439	2062369	1149263	1748736	2990820	3209022	4007809	2553713	1620313	3445878	0	0	0	0	0
PEDF_BOVIN	Pigment epithelium-derived factor (PEDF) (Serpin F1)	489576	354982	337424	409659	345755	623216	552152	479505	436888	592074	0	0	0	0	0	6149473	4980502	4819081	7671399	8531810
APOE_BOVIN	Apolipoprotein E (Apo-E)	480441	477471	582922	574173	542827	794148	696570	659524	641745	693391	0	0	0	0	0	13078121	8401597	8982266	10345676	14186474
F12AI_BOVIN	Factor XIIa inhibitor (XIIaINH)	479938	422351	428082	584714	584924	768340	479652	777049	491263	750479	0	0	0	0	0	12267808	3472294	14453736	14515641	20127070
LYSC_HUMAN	Lysozyme C (EC 3.2.1.17) (1,4-beta-N-acetylmuramidase C)	477435	526876	487254	270477	515092	115014	468721	279746	293926	803467	1519419	1407470	1759943	1948109	1825981	0	0	0	0	0
CO3_BOVIN	Complement C3 [Cleaved into: Complement C3 beta chain; Complement C3 alpha chain; C3a anaphylatoxin; C3-beta-c (C3bc); Acylation stimulating protein (ASP) (C3adesArg); Complement C3b alpha' chain; Complement C3c alpha' chain fragment 1; Complement C3dg fragment; Complement C3g fragment; Complement C3d fragment; Complement C3f fragment; Complement C3c alpha' chain fragment 2]	471748	364453	372780	418830	497112	788602	572219	584516	484433	584567	0	0	0	0	0	1246457	649449	1283805	2124939	1487498
FIBG_HUMAN	Fibrinogen gamma chain	466220	390295	505991	409887	795140	254148	208679	275696	389038	197821	982644	1234465	958191	829802	902833	0	0	0	0	0
ITIH3_BOVIN	Inter-alpha-trypsin inhibitor heavy chain H3 (ITI heavy chain H3) (ITI-HC3) (Inter-alpha-inhibitor heavy chain 3)	455893	332758	279810	316798	338248	457481	434514	359907	328829	449035	0	0	0	0	0	212889	110090	183822	217366	244329
KLKB1_HUMAN	Plasma kallikrein (EC 3.4.21.34) (Fletcher factor) (Kininogenin) (Plasma prekallikrein) (PKK) [Cleaved into: Plasma kallikrein heavy chain; Plasma kallikrein light chain]	434278	463008	450764	373745	478870	292573	519182	451738	592147	401670	2891739	2696166	2259619	1961308	3208958	0	0	0	0	0
CO4_BOVIN	Complement C4 [Cleaved into: Complement C4 alpha chain; C4a anaphylatoxin; Complement C4 gamma chain]	422963	385279	396432	433769	397948	700023	693246	618345	612810	610064	0	0	0	0	0	889899	362828	1487070	2559522	860881
TTHY_HUMAN	Transthyretin (ATTR) (Prealbumin) (TBPA)	421007	370420	816324	507329	836335	173508	132849	239259	264020	151123	392810	748036	745557	60163	322404	0	0	0	0	0
CFAB_BOVIN	Complement factor B (EC 3.4.21.47) (C3/C5 convertase) (EC-VMFB) [Cleaved into: Complement factor B Ba fragment; Complement factor B Bb fragment]	415486	359544	337022	418855	417791	819130	660056	678748	575120	689630	0	0	0	0	0	299429	188013	370660	864197	484758
A2MG_HUMAN	Alpha-2-macroglobulin (Alpha-2-M) (C3 and PZP-like alpha-2-macroglobulin domain-containing protein 5)	398869	356371	579727	548273	521316	180490	223015	244873	449249	224818	709297	1061454	601433	448322	485573	0	0	0	0	0
IC1_HUMAN	Plasma protease C1 inhibitor (C1 Inh) (C1Inh) (C1 esterase inhibitor) (C1-inhibiting factor) (Serpin G1)	397714	257220	301370	333101	328224	203821	225251	177073	317270	381526	950898	929715	633233	291072	718634	0	0	0	0	0
A1AT_HUMAN	Alpha-1-antitrypsin (Alpha-1 protease inhibitor) (Alpha-1-antiproteinase) (Serpin A1) [Cleaved into: Short peptide from AAT (SPAAT)]	374097	319635	535247	535397	579122	264537	258121	344808	463074	293328	737488	1189665	607883	282408	467697	0	0	0	0	0
IBP5_HUMAN	Insulin-like growth factor-binding protein 5 (IBP-5) (IGF-binding protein 5) (IGFBP-5)	364921	321421	320579	195032	251823	90357	100314	110953	124447	97991	347980	329006	346591	461709	474714	0	0	0	0	0
CO3_HUMAN	Complement C3 (C3 and PZP-like alpha-2-macroglobulin domain-containing protein 1) [Cleaved into: Complement C3 beta chain; C3-beta-c (C3bc); Complement C3 alpha chain; C3a anaphylatoxin; Acylation stimulating protein (ASP) (C3adesArg); Complement C3b alpha' chain; Complement C3c alpha' chain fragment 1; Complement C3dg fragment; Complement C3g fragment; Complement C3d fragment; Complement C3f fra…	360194	291365	437995	403200	426409	200731	249693	272510	388350	256121	554802	672974	420051	271435	409249	0	0	0	0	0
HPT_HUMAN	Haptoglobin (Zonulin) [Cleaved into: Haptoglobin alpha chain; Haptoglobin beta chain]	349248	453902	864387	814878	685913	138191	234916	236781	413820	254761	873277	1317471	453587	360368	380894	0	0	0	0	0
MGP_HUMAN	Matrix Gla protein (MGP) (Cell growth-inhibiting gene 36 protein)	342366	306009	214869	164339	260738	131820	188155	136051	235718	123055	865968	873868	838191	795301	941782	0	0	0	0	0
FCN1_HUMAN	Ficolin-1 (Collagen/fibrinogen domain-containing protein 1) (Ficolin-A) (Ficolin-alpha) (M-ficolin)	322546	296613	326541	192722	240521	264570	288995	259078	348849	364798	602880	394038	486381	544490	622554	0	0	0	0	0
ANGT_BOVIN	Angiotensinogen (Serpin A8) [Cleaved into: Angiotensin-1 (Angiotensin 1-10) (Angiotensin I) (Ang I); Angiotensin-2 (Angiotensin 1-8) (Angiotensin II) (Ang II); Angiotensin-3 (Angiotensin 2-8) (Angiotensin III) (Ang III) (Des-Asp[1]-angiotensin II); Angiotensin-4 (Angiotensin 3-8) (Angiotensin IV) (Ang IV); Angiotensin 1-9; Angiotensin 1-7; Angiotensin 1-5; Angiotensin 1-4]	305354	268234	268112	429853	437763	1195870	633879	500416	394065	461463	0	0	0	0	0	286122	253108	509428	619345	521701
PLMN_BOVIN	Plasminogen (EC 3.4.21.7) [Cleaved into: Plasmin heavy chain A; Activation peptide; Plasmin heavy chain A, short form; Plasmin light chain B]	303203	362630	347335	368328	459504	1565402	2653659	2191738	2169174	2557837	0	0	0	0	0	230299	175397	786154	1242060	298155
FA11_BOVIN	Coagulation factor XI (FXI) (EC 3.4.21.27) (Plasma thromboplastin antecedent) (PTA) [Cleaved into: Coagulation factor XIa heavy chain; Coagulation factor XIa light chain]	297004	250101	224947	314825	368603	226550	206611	230550	298603	210168	0	0	0	0	0	34777	27963	33463	33183	28944
APOD_BOVIN	Apolipoprotein D (Apo-D) (ApoD)	296287	315122	367580	364857	544563	1574674	719380	1781667	1002354	1307963	0	0	0	0	0	140001	101031	296256	135572	145753
KLKB1_BOVIN	Plasma kallikrein (EC 3.4.21.34) (Fletcher factor) (Kininogenin) (Plasma prekallikrein) [Cleaved into: Plasma kallikrein heavy chain; Plasma kallikrein light chain]	296208	413975	420223	291858	424560	497245	464431	713119	848397	298330	0	0	0	0	0	65889	52131	177141	187227	74214
FA5_BOVIN	Coagulation factor V (Activated protein C cofactor) [Cleaved into: Coagulation factor V heavy chain; Coagulation factor V light chain]	279632	273184	278689	296545	320101	380333	362803	388695	373864	315415	0	0	0	0	0	2312968	1209445	3018219	4084269	2876578
RET4_BOVIN	Retinol-binding protein 4 (Plasma retinol-binding protein) (PRBP) (RBP)	275409	188058	129574	179769	204497	475923	291671	264930	198837	255574	0	0	0	0	0	7768	7621	49447	36047	19765
CXCL7_HUMAN	Platelet basic protein (PBP) (C-X-C motif chemokine 7) (Leukocyte-derived growth factor) (LDGF) (Macrophage-derived growth factor) (MDGF) (Small-inducible cytokine B7) [Cleaved into: Connective tissue-activating peptide III (CTAP-III) (LA-PF4) (Low-affinity platelet factor IV); TC-2; Connective tissue-activating peptide III(1-81) (CTAP-III(1-81)); Beta-thromboglobulin (Beta-TG); Neutrophil-activa…	273661	209419	404656	141710	333773	35643	78478	88362	95337	73262	514698	432244	489365	519312	440829	0	0	0	0	0
TRFE_HUMAN	Serotransferrin (Transferrin) (Beta-1 metal-binding globulin) (Siderophilin)	273290	221730	416574	488237	602826	260175	320540	412806	1206614	423368	994042	1709839	307278	253223	223539	0	0	0	0	0
FA5_HUMAN	Coagulation factor V (Activated protein C cofactor) (Proaccelerin, labile factor) [Cleaved into: Coagulation factor V heavy chain; Coagulation factor V light chain]	270914	268304	318371	213750	305425	171062	126765	184303	214244	141858	513745	662044	560905	490055	477355	0	0	0	0	0
CO5_HUMAN	Complement C5 (C3 and PZP-like alpha-2-macroglobulin domain-containing protein 4) [Cleaved into: Complement C5 beta chain; Complement C5 alpha chain; C5a anaphylatoxin; Complement C5 alpha' chain]	269835	242895	276264	268784	275308	229950	253468	275580	346556	250534	250714	361390	221039	177103	150267	0	0	0	0	0
ITIH4_BOVIN	Inter-alpha-trypsin inhibitor heavy chain H4 (ITI heavy chain H4) (ITI-HC4) (Inter-alpha-inhibitor heavy chain 4)	266755	207935	153903	276276	302205	440026	335464	307637	280649	297449	0	0	0	0	0	2362711	1088574	1678449	2184960	3631062
AMBP_BOVIN	Protein AMBP [Cleaved into: Alpha-1-microglobulin (EC 1.6.2.-); Inter-alpha-trypsin inhibitor light chain (ITI-LC) (BI-14) (Bikunin) (Cumulus extracellular matrix-stabilizing factor) (ESF) (HI-30); Trypstatin]	258957	316071	240132	256181	281169	1130045	1257456	1134720	873649	1236010	0	0	0	0	0	214997	124040	2069846	2578008	206906
IGJ_HUMAN	Immunoglobulin J chain (Joining chain of multimeric IgA and IgM)	257497	240817	277262	180694	208438	124937	169447	162432	294034	135473	479131	427595	351619	450605	494328	0	0	0	0	0
APMAP_HUMAN	Adipocyte plasma membrane-associated protein (Protein BSCv)	257246	317623	309036	349244	239064	141341	323761	298811	219480	226364	40972	63484	61903	45583	37226	0	0	0	0	0
GELS_BOVIN	Gelsolin (Actin-depolymerizing factor) (ADF) (Brevin)	240396	233057	228479	174396	193022	196203	250065	188691	269652	226078	0	0	0	0	0	5484889	3476720	3596523	4091756	13495597
FIBA_BOVIN	Fibrinogen alpha chain [Cleaved into: Fibrinopeptide A; Fibrinogen alpha chain]	238123	217987	219030	210129	229217	287196	267005	241173	232352	262314	0	0	0	0	0	1692545	528506	1999818	1825638	1703785
HEMO_HUMAN	Hemopexin (Beta-1B-glycoprotein)	235450	276406	581560	487371	552708	147864	219392	277327	581227	230361	621180	987339	205419	172284	234931	0	0	0	0	0
CFAH_BOVIN	Complement factor H (H factor 1)	231732	248718	234967	206796	231322	339481	555758	526731	522663	432683	0	0	0	0	0	514184	389376	3589513	8016304	923885
APOH_HUMAN	Beta-2-glycoprotein 1 (APC inhibitor) (Activated protein C-binding protein) (Anticardiolipin cofactor) (Apolipoprotein H) (Apo-H) (Beta-2-glycoprotein I) (B2GPI) (Beta(2)GPI)	228743	218932	318556	274644	320956	74522	155452	114777	198781	177470	312971	357346	167226	183204	408164	0	0	0	0	0
FBLN1_HUMAN	Fibulin-1 (FIBL-1)	227167	176482	194816	175451	202064	299992	214824	244935	235721	269131	72697	97396	72888	85354	77361	0	0	0	0	0
ANT3_BOVIN	Antithrombin-III (ATIII) (Serpin C1)	226997	181902	163196	220165	200054	675593	387704	442235	309391	444735	0	0	0	0	0	395710	318015	706575	864927	468085
A2AP_HUMAN	Alpha-2-antiplasmin (Alpha-2-AP) (Alpha-2-plasmin inhibitor) (Alpha-2-PI) (Serpin F2)	221418	212555	258255	194375	248282	67874	94725	100051	132921	93405	514562	468238	438532	485634	528965	0	0	0	0	0
APOC2_HUMAN	Apolipoprotein C-II (Apo-CII) (ApoC-II) (Apolipoprotein C2) [Cleaved into: Proapolipoprotein C-II (ProapoC-II)]	220506	227404	194953	189484	269130	233233	224438	253474	326835	269034	332940	548283	511370	178457	603772	0	0	0	0	0
APOM_HUMAN	Apolipoprotein M (Apo-M) (ApoM) (Protein G3a)	219083	203391	197874	222796	191192	411404	452883	537494	576586	567056	93451	136368	128019	113556	100331	0	0	0	0	0
FIBB_BOVIN	Fibrinogen beta chain [Cleaved into: Fibrinopeptide B; Fibrinogen beta chain]	213579	157321	163823	155144	145723	191562	188903	166706	171273	172089	0	0	0	0	0	703154	184280	1036053	1514097	669628
CBPN_HUMAN	Carboxypeptidase N catalytic chain (CPN) (EC 3.4.17.3) (Anaphylatoxin inactivator) (Arginine carboxypeptidase) (Carboxypeptidase N polypeptide 1) (Carboxypeptidase N small subunit) (Kininase-1) (Lysine carboxypeptidase) (Plasma carboxypeptidase B) (Serum carboxypeptidase N) (SCPN)	210155	235291	256456	176628	209029	59330	99090	90141	126337	95614	405670	459520	454645	471066	481040	0	0	0	0	0
IBP3_BOVIN	Insulin-like growth factor-binding protein 3 (IBP-3) (IGF-binding protein 3) (IGFBP-3)	204515	182966	204575	134377	220463	241574	411303	460820	593443	292372	0	0	0	0	0	121136	66946	922127	663097	146341
CLUS_HUMAN	Clusterin (Aging-associated gene 4 protein) (Apolipoprotein J) (Apo-J) (Complement cytolysis inhibitor) (CLI) (Complement-associated protein SP-40,40) (Ku70-binding protein 1) (NA1/NA2) (Sulfated glycoprotein 2) (SGP-2) (Testosterone-repressed prostate message 2) (TRPM-2) [Cleaved into: Clusterin beta chain (ApoJalpha) (Complement cytolysis inhibitor a chain); Clusterin alpha chain (ApoJbeta) (Co…	201337	200758	241646	169583	232965	171903	152837	187745	169175	184821	315266	383177	307792	274966	370915	0	0	0	0	0
THRB_BOVIN	Prothrombin (EC 3.4.21.5) (Coagulation factor II) [Cleaved into: Activation peptide fragment 1; Activation peptide fragment 2; Thrombin light chain; Thrombin heavy chain]	198409	189998	178807	163939	185253	333435	338510	270918	310961	236384	0	0	0	0	0	1046293	509984	11872538	10746317	1176668
IGKC_HUMAN	Immunoglobulin kappa constant (Ig kappa chain C region) (Ig kappa chain C region AG) (Ig kappa chain C region CUM) (Ig kappa chain C region EU) (Ig kappa chain C region OU) (Ig kappa chain C region ROY) (Ig kappa chain C region TI)	193576	173190	131822	210054	213358	118252	231272	164667	346769	162459	327749	292557	21291	15922	54367	0	0	0	0	0
HEP2_HUMAN	Heparin cofactor 2 (Heparin cofactor II) (HC-II) (Protease inhibitor leuserpin-2) (HLS2) (Serpin D1)	192947	192900	241593	217373	195072	135297	115849	161468	204983	121042	186823	346236	206154	120270	101120	0	0	0	0	0
QSOX1_HUMAN	Sulfhydryl oxidase 1 (hQSOX) (EC 1.8.3.2) (Quiescin Q6)	186827	163630	131269	175005	193811	162530	140257	165289	140671	157622	189396	142505	204318	136993	259304	0	0	0	0	0
GELS_HUMAN	Gelsolin (AGEL) (Actin-depolymerizing factor) (ADF) (Brevin)	183831	250015	239603	212139	266439	59464	71064	88199	96271	89429	174537	169910	132406	113069	135144	0	0	0	0	0
APOD_HUMAN	Apolipoprotein D (Apo-D) (ApoD)	183382	181172	270777	160494	225267	138215	161450	245455	281560	314238	596905	666162	469394	405113	526048	0	0	0	0	0
A1AG1_HUMAN	Alpha-1-acid glycoprotein 1 (AGP 1) (Orosomucoid-1) (OMD 1)	180491	195596	256783	199485	365246	82312	136944	106178	181819	99711	156582	292104	134444	140982	102531	0	0	0	0	0
HBB_HUMAN	Hemoglobin subunit beta (Beta-globin) (Hemoglobin beta chain) [Cleaved into: LVV-hemorphin-7; Spinorphin]	173313	181357	252613	174381	206509	118049	164791	181274	269474	198364	229879	269934	257283	218682	301534	0	0	0	0	0
THBG_BOVIN	Thyroxine-binding globulin (Serpin A7) (T4-binding globulin)	159287	129425	124189	131942	144057	230488	139961	116990	95195	152841	0	0	0	0	0	24127	13218	22360	22238	24766
SPA37_BOVIN	Serpin A3-7	158879	170521	149325	185421	190147	646648	208091	288043	186595	199894	0	0	0	0	0	311714	158425	539554	689196	1185295
ANT3_HUMAN	Antithrombin-III (ATIII) (Serpin C1)	149896	163442	169893	152640	210545	77919	94517	87016	116781	121010	571967	633150	481726	269764	591254	0	0	0	0	0
LMNA_HUMAN	Prelamin-A/C [Cleaved into: Lamin-A/C (70 kDa lamin) (Renal carcinoma antigen NY-REN-32)]	147796	125816	122658	81394	110918	124238	151774	129694	122246	144679	89229	165641	112944	168978	97746	0	0	0	0	0
PROS_BOVIN	Vitamin K-dependent protein S	142589	57696	83725	130548	134593	228255	190349	203327	134059	184800	0	0	0	0	0	39975	20210	49155	58057	46292
LYOX_BOVIN	Protein-lysine 6-oxidase (EC 1.4.3.13) (Lysyl oxidase) [Cleaved into: Protein-lysine 6-oxidase, long form; Protein-lysine 6-oxidase, short form]	136915	101251	143414	78094	97090	29222	57965	54481	61891	47801	0	0	0	0	0	8312	4548	19821	19241	24437
CADH1_BOVIN	Cadherin-1 (Epithelial cadherin) (E-cadherin) (CD antigen CD324) [Cleaved into: E-Cad/CTF1; E-Cad/CTF2; E-Cad/CTF3]	135596	157210	199855	152779	205014	242311	173355	269594	340061	96868	0	0	0	0	0	14013	3626	35020	120222	20746
CLUS_BOVIN	Clusterin (Glycoprotein III) (GpIII) [Cleaved into: Clusterin beta chain; Clusterin alpha chain]	135560	126006	122735	150795	154603	332347	148214	161499	146774	174660	0	0	0	0	0	738227	227711	890526	677107	1029975
THBG_HUMAN	Thyroxine-binding globulin (Serpin A7) (T4-binding globulin)	134242	86542	272844	222486	96900	99079	63808	69295	121018	73273	160053	84855	46731	67910	47996	0	0	0	0	0
AACT_HUMAN	Alpha-1-antichymotrypsin (ACT) (Cell growth-inhibiting gene 24/25 protein) (Serpin A3) [Cleaved into: Alpha-1-antichymotrypsin His-Pro-less]	127179	143614	263968	254761	216498	52074	87211	120872	201316	109827	257671	453386	197760	108471	132908	0	0	0	0	0
KPYM_HUMAN	Pyruvate kinase PKM (EC 2.7.1.40) (Cytosolic thyroid hormone-binding protein) (CTHBP) (Opa-interacting protein 3) (OIP-3) (Pyruvate kinase 2/3) (Pyruvate kinase muscle isozyme) (Threonine-protein kinase PKM2) (EC 2.7.11.1) (Thyroid hormone-binding protein 1) (THBP1) (Tumor M2-PK) (Tyrosine-protein kinase PKM2) (EC 2.7.10.2) (p58)	125619	123018	147321	105126	134688	132020	124099	136658	154977	115111	103356	96247	96467	101824	87997	0	0	0	0	0
MYH9_HUMAN	Myosin-9 (Cellular myosin heavy chain, type A) (Myosin heavy chain 9) (Myosin heavy chain, non-muscle IIa) (Non-muscle myosin heavy chain A) (NMMHC-A) (Non-muscle myosin heavy chain IIa) (NMMHC II-a) (NMMHC-IIA)	122747	137614	152620	108437	138335	134652	150564	167790	184723	95175	26531	32579	29613	34733	26594	0	0	0	0	0
SAMP_HUMAN	Serum amyloid P-component (SAP) (9.5S alpha-1-glycoprotein) [Cleaved into: Serum amyloid P-component(1-203)]	122336	122547	143326	108426	140733	67416	99227	110379	142001	134890	182865	210365	194486	170794	174176	0	0	0	0	0
HV307_HUMAN	Immunoglobulin heavy variable 3-7 (Ig heavy chain V-III region GAL) (Ig heavy chain V-III region GAR) (Ig heavy chain V-III region JON)	122261	135190	130451	103866	131231	38225	48417	46868	70355	45127	338225	310679	318527	392306	382907	0	0	0	0	0
TSP1_BOVIN	Thrombospondin-1 (Glycoprotein G)	116355	111570	100053	115060	116175	120215	107444	118401	109790	119686	0	0	0	0	0	217016	176613	1504095	4139225	300722
APOL1_HUMAN	Apolipoprotein L1 (Apolipoprotein L) (Apo-L) (ApoL) (Apolipoprotein L-I) (ApoL-I)	112026	149397	100048	84400	141387	94305	110199	145381	147257	168098	192588	224308	262838	188029	188667	0	0	0	0	0
CFAB_HUMAN	Complement factor B (EC 3.4.21.47) (C3/C5 convertase) (Glycine-rich beta glycoprotein) (GBG) (PBF2) (Properdin factor B) [Cleaved into: Complement factor B Ba fragment; Complement factor B Bb fragment]	104656	103439	177727	152484	149039	37423	51581	69053	138028	67218	219377	281523	138084	93163	130061	0	0	0	0	0
H15_HUMAN	Histone H1.5 (Histone H1a) (Histone H1b) (Histone H1s-3)	104586	117190	98370	59873	79604	19261	34026	34141	43635	21415	70356	56856	67457	55911	62179	0	0	0	0	0
B2MG_BOVIN	Beta-2-microglobulin (Lactollin)	104365	103648	108683	88978	94998	128002	125173	120975	87516	127033	0	0	0	0	0	57190	14661	39051	33439	69442
FETUA_HUMAN	Alpha-2-HS-glycoprotein (Alpha-2-Z-globulin) (Ba-alpha-2-glycoprotein) (Fetuin-A) [Cleaved into: Alpha-2-HS-glycoprotein chain A; Alpha-2-HS-glycoprotein chain B]	101047	106289	200724	207627	170840	36976	50766	65798	112644	52263	197644	320097	168984	123820	109486	0	0	0	0	0
APOA4_BOVIN	Apolipoprotein A-IV (Apo-AIV) (ApoA-IV) (Apolipoprotein A4)	101034	101844	100642	95372	91025	102293	105357	94918	86257	104804	0	0	0	0	0	524753	303750	379429	325451	473710
PRG4_HUMAN	Proteoglycan 4 (Lubricin) (Megakaryocyte-stimulating factor) (Superficial zone proteoglycan) [Cleaved into: Proteoglycan 4 C-terminal part]	99251	106012	122215	78642	124459	62980	83235	83403	107546	78360	176537	225600	209148	171495	180030	0	0	0	0	0
KNG2_BOVIN	Kininogen-2 (Kininogen II) (Thiol proteinase inhibitor) [Cleaved into: Kininogen-2 heavy chain; Bradykinin (Kallidin I); Lysyl-bradykinin (Kallidin II); Kininogen-2 light chain]	94727	65793	81446	92519	118507	211324	124769	124153	118575	118912	0	0	0	0	0	61967	15091	99731	110622	107652
SPP24_BOVIN	Secreted phosphoprotein 24 (Spp-24) (Secreted phosphoprotein 2)	94712	92560	89953	65881	96766	102807	90168	118609	125808	96013	0	0	0	0	0	144991	102321	273832	184525	128493
LUM_BOVIN	Lumican (Corneal keratan sulfate proteoglycan 37B core protein) (Keratan sulfate proteoglycan) (KSPG)	91964	66426	69392	81366	87583	142806	127731	124393	99109	125017	0	0	0	0	0	48948	25637	69657	63826	69533
THRB_HUMAN	Prothrombin (EC 3.4.21.5) (Coagulation factor II) [Cleaved into: Activation peptide fragment 1; Activation peptide fragment 2; Thrombin light chain; Thrombin heavy chain]	91916	97138	124441	83806	102764	38298	53472	58762	82209	54248	93235	149990	96460	75375	106298	0	0	0	0	0
CO7_BOVIN	Complement component C7	88789	87451	82996	83609	91207	137995	141161	148213	124060	155686	0	0	0	0	0	360123	154963	680174	2224172	356533
VNN1_BOVIN	Pantetheinase (EC 3.5.1.92) (Pantetheine hydrolase) (Vascular non-inflammatory molecule 1) (Vanin-1)	88716	100460	77957	100685	105733	207790	168963	135310	94305	146544	0	0	0	0	0	6071	7674	8027	14118	11456
CL43_BOVIN	Collectin-43 (CL-43) (43 kDa collectin)	85755	74839	70043	90077	81825	80618	98520	84605	73294	82340	0	0	0	0	0	55567	12268	48908	40587	67331
PON1_HUMAN	Serum paraoxonase/arylesterase 1 (PON 1) (EC 3.1.1.2) (EC 3.1.1.81) (EC 3.1.8.1) (Aromatic esterase 1) (A-esterase 1) (K-45) (Serum aryldialkylphosphatase 1)	82003	90264	113527	86185	108319	60775	60563	74223	79246	79792	108925	165780	118495	48733	118239	0	0	0	0	0
CADH5_BOVIN	Cadherin-5 (Vascular endothelial cadherin) (VE-cadherin) (CD antigen CD144)	79163	63931	56015	59532	62271	85131	72900	73699	51443	71317	0	0	0	0	0	12469	5383	9530	8532	12206
SAA_BOVIN	Serum amyloid A protein (SAA) [Cleaved into: Amyloid protein A (Amyloid fibril protein AA)]	75971	88889	100532	58365	72744	16025	9470	14886	35664	3358	0	0	0	0	0	5096	1557	4218	2652	2634
CBG_BOVIN	Corticosteroid-binding globulin (CBG) (Serpin A6) (Transcortin)	75565	51843	56235	51255	62757	105700	65448	63339	51326	77997	0	0	0	0	0	10429	10041	10186	11650	10417
KAIN_HUMAN	Kallistatin (Kallikrein inhibitor) (Peptidase inhibitor 4) (PI-4) (Serpin A4)	70905	72940	87159	101922	85548	28160	33643	38473	63596	41632	137342	172310	144757	101509	137678	0	0	0	0	0
IPSP_BOVIN	Plasma serine protease inhibitor (Protein C inhibitor) (PCI) (Serpin A5)	67648	51633	66314	71708	103558	177881	73417	98531	152187	69362	0	0	0	0	0	434489	182370	387653	535934	718196
POSTN_HUMAN	Periostin (PN) (Osteoblast-specific factor 2) (OSF-2)	66964	71462	64151	54286	55257	67150	71552	64942	62774	57996	28523	36182	28606	31596	32409	0	0	0	0	0
SPA38_BOVIN	Serpin A3-8	66403	51156	47616	55821	55614	76261	61506	54945	39032	56734	0	0	0	0	0	2998	2722	3060	3890	5205
ZPI_HUMAN	Protein Z-dependent protease inhibitor (PZ-dependent protease inhibitor) (PZI) (Serpin A10)	65277	67130	59470	49957	57408	26794	36064	28454	36568	36176	91498	131228	156540	87105	72223	0	0	0	0	0
C4BPA_BOVIN	C4b-binding protein alpha chain (C4bp)	65132	63702	69136	69195	66616	89608	92227	95922	80583	92390	0	0	0	0	0	77134	52741	826107	576556	83333
ANGT_HUMAN	Angiotensinogen (Serpin A8) [Cleaved into: Angiotensin-1 (Angiotensin 1-10) (Angiotensin I) (Ang I); Angiotensin-2 (Angiotensin 1-8) (Angiotensin II) (Ang II); Angiotensin-3 (Angiotensin 2-8) (Angiotensin III) (Ang III) (Des-Asp[1]-angiotensin II); Angiotensin-4 (Angiotensin 3-8) (Angiotensin IV) (Ang IV); Angiotensin 1-9; Angiotensin 1-7; Angiotensin 1-5; Angiotensin 1-4]	64183	67145	93488	90747	94151	38987	35704	41438	71887	39142	101598	142130	80089	45246	52666	0	0	0	0	0
CHIA_BOVIN	Acidic mammalian chitinase (AMCase) (EC 3.2.1.14) (Chitin-binding protein b04) (CBPb04)	62781	81087	68527	115550	120278	206931	158205	139232	106616	141909	0	0	0	0	0	105943	10407	78442	66271	89521
CATS_HUMAN	Cathepsin S (EC 3.4.22.27)	62638	69457	64786	34904	49362	16040	21514	21785	27517	19675	133353	136232	153054	186630	165101	0	0	0	0	0
DCD_HUMAN	Dermcidin (EC 3.4.-.-) (Preproteolysin) [Cleaved into: Survival-promoting peptide; DCD-1]	60270	111103	57062	33150	30011	78324	105273	112620	88340	31857	133233	148269	119226	201012	151147	0	0	0	0	0
MGP_BOVIN	Matrix Gla protein (MGP) [Cleaved into: Matrix Gla protein long form; Matrix Gla protein short form]	60097	60328	59494	21730	61712	73336	31439	46818	53291	21434	0	0	0	0	0	16409	2461	21674	14555	16216
CO8B_HUMAN	Complement component C8 beta chain (Complement component 8 subunit beta)	59936	63989	79489	50888	71321	52126	41474	34837	69283	59205	107060	134574	103023	53421	89300	0	0	0	0	0
HP20_BOVIN	Protein HP-20 homolog	59581	53166	49947	32679	63964	108532	101788	96082	69398	99113	0	0	0	0	0	8227	5661	19817	22690	9769
A1BG_HUMAN	Alpha-1B-glycoprotein (Alpha-1-B glycoprotein)	59089	52467	127293	163405	149582	34856	43376	53001	127065	47613	165187	262768	88981	56184	52440	0	0	0	0	0
HV374_HUMAN	Immunoglobulin heavy variable 3-74	58240	41477	58993	79896	85525	42723	40008	55169	81314	43431	90658	117724	42939	45719	54080	0	0	0	0	0
K2C5_HUMAN	Keratin, type II cytoskeletal 5 (58 kDa cytokeratin) (Cytokeratin-5) (CK-5) (Keratin-5) (K5) (Type-II keratin Kb5)	58177	83977	61682	26016	47029	67758	74913	68988	153809	59170	188228	149208	76097	101806	76277	0	0	0	0	0
CERU_HUMAN	Ceruloplasmin (EC 1.16.3.1) (Ferroxidase)	56421	56295	116455	88927	85419	28973	41511	44247	71423	46951	98899	148763	54566	50777	50147	0	0	0	0	0
VTDB_HUMAN	Vitamin D-binding protein (DBP) (VDB) (Gc protein-derived macrophage activating factor) (Gc-MAF) (GcMAF) (Gc-globulin) (Group-specific component) (Gc) (Vitamin D-binding protein-macrophage activating factor) (DBP-maf)	56393	42250	104109	105600	96864	22741	35260	30354	73725	42830	140544	214507	73254	44768	53195	0	0	0	0	0
CO6A1_HUMAN	Collagen alpha-1(VI) chain	55694	53492	46278	53717	53327	62093	63922	56927	60868	57626	46642	36746	45271	36962	49293	0	0	0	0	0
HRG_BOVIN	Histidine-rich glycoprotein (Histidine-proline-rich glycoprotein) (HPRG)	55027	47682	51996	48523	76986	488484	249641	530610	589764	113045	0	0	0	0	0	138287	78375	212671	173915	141354
HGFL_BOVIN	Hepatocyte growth factor-like protein (Macrophage stimulatory protein) (Macrophage-stimulating protein) (MSP) [Cleaved into: Hepatocyte growth factor-like protein alpha chain; Hepatocyte growth factor-like protein beta chain]	54689	54709	44451	55917	90941	138086	156994	175760	256570	146642	0	0	0	0	0	70159	17875	130206	970055	66253
PLTP_HUMAN	Phospholipid transfer protein (Lipid transfer protein II)	54642	76966	55968	56382	71162	95617	58158	83775	56490	68606	40408	43913	46223	53551	43190	0	0	0	0	0
FA12_BOVIN	Coagulation factor XII (EC 3.4.21.38) (Hageman factor) (HAF) [Cleaved into: Coagulation factor XIIa heavy chain; Coagulation factor XIIa light chain]	52185	50132	42775	43796	53018	327648	544915	656798	918120	463570	0	0	0	0	0	47929	56014	360650	520695	59329
CAN1_HUMAN	Calpain-1 catalytic subunit (EC 3.4.22.52) (Calcium-activated neutral proteinase 1) (CANP 1) (Calpain mu-type) (Calpain-1 large subunit) (Cell proliferation-inducing gene 30 protein) (Micromolar-calpain) (muCANP)	51726	55666	61933	45878	63139	26946	37811	46046	65518	30486	136240	153599	142527	153151	144330	0	0	0	0	0
FABPL_BOVIN	Fatty acid-binding protein, liver (Fatty acid-binding protein 1) (Liver-type fatty acid-binding protein) (L-FABP)	51100	34829	28761	32066	31769	49240	37753	38677	20625	25605	0	0	0	0	0	18959	6808	21882	14701	21419
FA9_BOVIN	Coagulation factor IX (EC 3.4.21.22) (Christmas factor) [Cleaved into: Coagulation factor IXa light chain; Coagulation factor IXa heavy chain]	49912	57295	57027	50285	59352	85315	63655	97341	125232	65389	0	0	0	0	0	575240	194009	1480806	1355004	957116
TLN1_HUMAN	Talin-1	49748	46663	47644	45215	48290	49117	56169	52550	56880	53089	34023	33240	33898	33041	38909	0	0	0	0	0
CO9_BOVIN	Complement component C9	49197	46548	50523	58317	71777	73155	90265	81081	60472	99545	0	0	0	0	0	237830	76859	317668	529103	504843
DSC3_HUMAN	Desmocollin-3 (Cadherin family member 3) (Desmocollin-4) (HT-CP)	48991	40667	45534	18993	35514	5032	10622	6143	9750	5785	59999	58693	65422	59930	13167	0	0	0	0	0
FIBG_BOVIN	Fibrinogen gamma-B chain (Gamma')	48418	47257	47874	42989	46214	62673	55419	48772	64869	46274	0	0	0	0	0	394465	73575	603715	780083	573803
CD5L_HUMAN	CD5 antigen-like (Apoptosis inhibitor expressed by macrophages) (hAIM) (CT-2) (IgM-associated peptide) (SP-alpha)	45930	44559	50366	34637	47130	31082	69172	71757	125309	84538	216966	124564	91016	84509	144413	0	0	0	0	0
G3P_BOVIN	Glyceraldehyde-3-phosphate dehydrogenase (GAPDH) (EC 1.2.1.12) (Peptidyl-cysteine S-nitrosylase GAPDH) (EC 2.6.99.-)	45780	56597	55793	46224	44370	58656	58715	68450	59084	53237	0	0	0	0	0	163020	59968	774366	788542	274711
FLNA_HUMAN	Filamin-A (FLN-A) (Actin-binding protein 280) (ABP-280) (Alpha-filamin) (Endothelial actin-binding protein) (Filamin-1) (Non-muscle filamin)	44005	42763	45435	37342	41538	40534	50190	44690	46858	44201	29797	30328	31524	31196	32246	0	0	0	0	0
HABP2_BOVIN	Hyaluronan-binding protein 2 (EC 3.4.21.-) [Cleaved into: Hyaluronan-binding protein 2 50 kDa heavy chain; Hyaluronan-binding protein 2 50 kDa heavy chain alternate form; Hyaluronan-binding protein 2 27 kDa light chain; Hyaluronan-binding protein 2 27 kDa light chain alternate form]	43773	49875	52101	39886	42451	85013	120463	111783	184990	86846	0	0	0	0	0	87287	66566	1349405	1877236	249275
VINC_HUMAN	Vinculin (Metavinculin) (MV)	43452	42623	45149	41895	41625	49809	55383	46965	45980	52290	17664	17371	17651	18048	18635	0	0	0	0	0
CO1A2_BOVIN	Collagen alpha-2(I) chain (Alpha-2 type I collagen)	43371	38635	38494	28827	24037	60328	45835	49747	27835	49419	0	0	0	0	0	22118	9072	22698	16092	18897
K1C14_HUMAN	Keratin, type I cytoskeletal 14 (Cytokeratin-14) (CK-14) (Keratin-14) (K14)	42959	59008	46234	34037	50638	44153	55794	39389	114707	35209	212845	109370	65783	44663	53218	0	0	0	0	0
HP252_BOVIN	Protein HP-25 homolog 2	42565	28260	18430	20318	23424	45039	33011	28284	21144	33627	0	0	0	0	0	4139	2444	4325	2501	3139
LV861_HUMAN	Immunoglobulin lambda variable 8-61	42541	23252	34331	40116	29352	6013	16810	7848	23683	12526	39852	49713	9710	6970	31822	0	0	0	0	0
HBB_BOVIN	Hemoglobin subunit beta (Beta-globin) (Hemoglobin beta chain) [Cleaved into: Spinorphin]	41679	33652	24069	22654	35229	64868	32210	35268	44052	50097	0	0	0	0	0	482091	151419	810666	736038	808254
CFAD_HUMAN	Complement factor D (EC 3.4.21.46) (Adipsin) (C3 convertase activator) (Properdin factor D)	40535	34063	32656	21386	54544	34605	38826	43658	45842	51899	110179	79585	71988	63913	89100	0	0	0	0	0
HBA_HUMAN	Hemoglobin subunit alpha (Alpha-globin) (Hemoglobin alpha chain) [Cleaved into: Hemopressin]	39904	34641	56870	61085	53352	9409	25798	33344	39045	31507	35482	53405	47929	7383	17540	0	0	0	0	0
G3P_HUMAN	Glyceraldehyde-3-phosphate dehydrogenase (GAPDH) (EC 1.2.1.12) (Peptidyl-cysteine S-nitrosylase GAPDH) (EC 2.6.99.-)	39903	68557	60564	20185	39600	48308	30346	38612	33134	34262	72241	50102	42143	57111	48470	0	0	0	0	0
ITIH1_HUMAN	Inter-alpha-trypsin inhibitor heavy chain H1 (ITI heavy chain H1) (ITI-HC1) (Inter-alpha-inhibitor heavy chain 1) (Inter-alpha-trypsin inhibitor complex component III) (Serum-derived hyaluronan-associated protein) (SHAP)	39698	48141	63696	55731	52185	16196	19671	19807	43837	17062	63167	85619	45083	32281	30646	0	0	0	0	0
BGH3_BOVIN	Transforming growth factor-beta-induced protein ig-h3 (Beta ig-h3) (MP70) (MP78)	38625	37057	33394	32529	35076	53796	41730	31167	34217	38122	0	0	0	0	0	451946	112086	275120	380678	730244
LDHB_BOVIN	L-lactate dehydrogenase B chain (LDH-B) (EC 1.1.1.27)	38588	40843	42458	41272	30205	41405	42464	42090	34579	43803	0	0	0	0	0	137829	84210	236187	268477	389747
FETUB_HUMAN	Fetuin-B (16G2) (Fetuin-like protein IRL685) (Gugu)	37990	4873	6872	8230	38031	53204	59837	62544	61358	45014	438	1624	416	719	395	0	0	0	0	0
AOCX_BOVIN	Primary amine oxidase, liver isozyme (EC 1.4.3.21) (Amine oxidase [copper-containing]) (Copper amine oxidase) (Serum amine oxidase) (SAO)	37532	27685	29128	41594	42635	48227	55704	41688	36448	42072	0	0	0	0	0	3636	2136	3894	2974	3199
CO3A1_HUMAN	Collagen alpha-1(III) chain	37337	34128	26295	26884	24589	62880	38525	34132	31799	41544	2815	3227	2834	3678	2470	0	0	0	0	0
COTL1_BOVIN	Coactosin-like protein	36988	40706	36082	32125	26891	43211	32740	34271	27804	36042	0	0	0	0	0	32809	12236	22024	11446	32728
FHL1_HUMAN	Four and a half LIM domains protein 1 (FHL-1) (Skeletal muscle LIM-protein 1) (SLIM) (SLIM-1)	36868	37424	35683	24575	35207	63326	91547	83217	90254	61106	28369	21880	24194	28676	31547	0	0	0	0	0
MA1A1_HUMAN	Mannosyl-oligosaccharide 1,2-alpha-mannosidase IA (EC 3.2.1.113) (Man(9)-alpha-mannosidase) (Man9-mannosidase) (Mannosidase alpha class 1A member 1) (Processing alpha-1,2-mannosidase IA) (Alpha-1,2-mannosidase IA)	36524	42000	42916	20314	44668	8891	17781	16788	14763	22795	12350	8520	13152	8331	10914	0	0	0	0	0
PGRP1_BOVIN	Peptidoglycan recognition protein 1 (Oligosaccharide-binding protein) (OBP) (Peptidoglycan recognition protein short) (PGRP-S)	36513	44272	40991	49014	63634	152576	91294	146571	167429	86992	0	0	0	0	0	26828	14057	29968	39189	14134
COMP_BOVIN	Cartilage oligomeric matrix protein (COMP)	36309	33026	37275	36283	38399	40491	52698	47508	49298	53067	0	0	0	0	0	38522	26662	338545	319802	31676
PHLD_BOVIN	Phosphatidylinositol-glycan-specific phospholipase D (PI-G PLD) (EC 3.1.4.50) (Glycoprotein phospholipase D) (Glycosyl-phosphatidylinositol-specific phospholipase D) (GPI-PLD) (GPI-specific phospholipase D)	36289	32091	30631	31157	31784	49996	46123	51196	36842	44501	0	0	0	0	0	18319	3873	19245	19641	23847
RGN_BOVIN	Regucalcin (RC) (Gluconolactonase) (GNL) (EC 3.1.1.17) (Senescence marker protein 30) (SMP-30)	36035	34415	38788	33436	37636	63438	74824	79632	47171	93254	0	0	0	0	0	82763	50071	686838	346930	74004
LG3BP_BOVIN	Galectin-3-binding protein (Lectin galactoside-binding soluble 3-binding protein)	35291	31609	27654	23353	24402	38008	39130	34682	26776	38286	0	0	0	0	0	2936	2243	5466	4994	3110
KCRM_HUMAN	Creatine kinase M-type (EC 2.7.3.2) (Creatine kinase M chain) (Creatine phosphokinase M-type) (CPK-M) (M-CK)	33191	26342	55151	50091	119771	15170	12231	14068	31485	10450	35172	108537	106017	22311	50343	0	0	0	0	0
CAMP_HUMAN	Cathelicidin antimicrobial peptide (18 kDa cationic antimicrobial protein) (CAP-18) (hCAP-18) [Cleaved into: Antibacterial peptide FALL-39 (FALL-39 peptide antibiotic); Antibacterial peptide LL-37; Antibacterial peptide KR-20; Antibacterial peptide LL-23; Antibacterial peptide LL-29; Antibacterial peptide KS-30; Antibacterial peptide RK-31; Antibacterial peptide FF-33]	32851	37826	18765	19024	18473	26998	23056	33184	36484	34361	48804	41875	51447	54382	45022	0	0	0	0	0
IL1AP_HUMAN	Interleukin-1 receptor accessory protein (IL-1 receptor accessory protein) (IL-1RAcP) (EC 3.2.2.6) (Interleukin-1 receptor 3) (IL-1R-3) (IL-1R3)	32499	26201	23570	28364	27886	43066	38829	33922	29365	34590	1764	2293	1827	1763	1542	0	0	0	0	0
ZA2G_HUMAN	Zinc-alpha-2-glycoprotein (Zn-alpha-2-GP) (Zn-alpha-2-glycoprotein)	32309	44198	92723	70903	86036	18388	27818	43736	77758	26347	88822	165118	46782	32186	20964	0	0	0	0	0
APOC3_BOVIN	Apolipoprotein C-III (Apo-CIII) (ApoC-III) (Apolipoprotein C3)	32176	23833	31334	25788	48533	66548	40934	48518	61184	57416	0	0	0	0	0	2105693	1854609	1822792	1133724	1403201
ALS_HUMAN	Insulin-like growth factor-binding protein complex acid labile subunit (ALS)	32145	38652	40853	32922	40678	37017	42917	41772	58681	44155	62104	46151	61615	43494	40408	0	0	0	0	0
ECP_HUMAN	Eosinophil cationic protein (ECP) (EC 3.1.27.-) (Ribonuclease 3) (RNase 3)	32067	41657	34541	32033	41226	65186	73593	51110	95241	83116	18182	24103	6360	26497	15106	0	0	0	0	0
CBPB2_BOVIN	Carboxypeptidase B2 (EC 3.4.17.20) (Carboxypeptidase U) (CPU) (Plasma carboxypeptidase B) (pCPB) (Thrombin-activable fibrinolysis inhibitor) (TAFI)	31719	30652	30629	29622	31132	81968	59396	41842	62052	36335	0	0	0	0	0	72324	23098	105553	202542	193848
3HAO_BOVIN	3-hydroxyanthranilate 3,4-dioxygenase (EC 1.13.11.6) (3-hydroxyanthranilate oxygenase) (3-HAO) (3-hydroxyanthranilic acid dioxygenase) (HAD)	31505	32082	30165	30544	17209	10545	34555	31213	7678	5544	0	0	0	0	0	2169	2748	2196	3737	2555
COIA1_HUMAN	Collagen alpha-1(XVIII) chain [Cleaved into: Endostatin; Non-collagenous domain 1 (NC1)]	31068	30162	31354	25384	24843	14540	21183	14665	24518	16413	29703	36058	23842	25250	34586	0	0	0	0	0
STOM_HUMAN	Stomatin (Erythrocyte band 7 integral membrane protein) (Erythrocyte membrane protein band 7.2) (Protein 7.2b)	30890	27871	31214	21185	23778	23745	30842	30396	38916	33582	37852	39217	37860	46432	49655	0	0	0	0	0
MBL2_BOVIN	Mannose-binding protein C (MBP-C) (Mannan-binding protein)	30641	33253	22783	23989	23251	26201	34533	25602	20804	30069	0	0	0	0	0	2675	876	5225	5916	2154
GGH_BOVIN	Gamma-glutamyl hydrolase (EC 3.4.19.9) (Conjugase) (GH) (Gamma-Glu-X carboxypeptidase)	30577	20830	21257	35186	33624	63986	52203	50284	42716	50147	0	0	0	0	0	22242	1616	14895	32153	31131
C1QC_HUMAN	Complement C1q subcomponent subunit C	30413	32895	60058	62450	56116	13671	27939	12217	34950	37272	32964	104415	50009	20677	45176	0	0	0	0	0
CO9_HUMAN	Complement component C9 [Cleaved into: Complement component C9a; Complement component C9b]	30338	28339	27435	24895	31073	15774	21906	20157	31251	22682	42793	57982	36494	22859	38583	0	0	0	0	0
CBPN_BOVIN	Carboxypeptidase N catalytic chain (CPN) (EC 3.4.17.3) (Carboxypeptidase N polypeptide 1) (Carboxypeptidase N small subunit)	30280	23135	33952	29072	48787	54319	42064	52333	56105	31751	0	0	0	0	0	35000	17627	25055	56554	48461
CALD1_HUMAN	Caldesmon (CDM)	29911	30244	30233	17755	25254	20328	15882	23473	22327	13195	8078	8886	8379	8312	7522	0	0	0	0	0
SDF1_HUMAN	Stromal cell-derived factor 1 (SDF-1) (hSDF-1) (C-X-C motif chemokine 12) (Intercrine reduced in hepatomas) (IRH) (hIRH) (Pre-B cell growth-stimulating factor) (PBSF) [Cleaved into: SDF-1-beta(3-72); SDF-1-alpha(3-67)]	29908	29713	33962	32692	51563	40819	55388	50399	66099	59559	47738	58329	46548	32250	37019	0	0	0	0	0
ANTR1_HUMAN	Anthrax toxin receptor 1 (Tumor endothelial marker 8)	29843	23058	29880	20054	24425	6467	19010	16281	20351	9852	36920	42629	48220	56131	54395	0	0	0	0	0
B2MG_HUMAN	Beta-2-microglobulin [Cleaved into: Beta-2-microglobulin form pI 5.3]	29745	26812	36590	12864	34066	1386	1652	2023	2623	2413	30524	22681	30799	29021	30460	0	0	0	0	0
HPTR_HUMAN	Haptoglobin-related protein	29713	26515	20772	40222	84024	55239	70852	65510	36533	30646	26858	64584	28193	22312	42772	0	0	0	0	0
C1QT3_HUMAN	Complement C1q tumor necrosis factor-related protein 3 (Collagenous repeat-containing sequence 26 kDa protein) (CORS26) (Secretory protein CORS26)	29710	24323	24124	21892	24396	20534	32388	23907	28335	22855	17572	21718	17623	15404	19349	0	0	0	0	0
C1QB_HUMAN	Complement C1q subcomponent subunit B	29133	30685	37922	57166	54627	19386	26912	22848	37804	26974	31530	38083	16017	12188	25173	0	0	0	0	0
CO8A_HUMAN	Complement component C8 alpha chain (Complement component 8 subunit alpha)	29046	26239	24277	19971	27553	16518	26104	17000	32003	16566	40165	33682	25791	17664	21502	0	0	0	0	0
TRFL_BOVIN	Lactotransferrin (Lactoferrin) (EC 3.4.21.-) [Cleaved into: Lactoferricin-B (Lfcin-B)]	28430	30088	36739	32982	54438	66785	69119	91596	129138	64255	0	0	0	0	0	23649	14761	41208	78590	30896
PEBP1_BOVIN	Phosphatidylethanolamine-binding protein 1 (PEBP-1) (Basic cytosolic 21 kDa protein) (HCNPpp) [Cleaved into: Hippocampal cholinergic neurostimulating peptide (HCNP)]	28296	37564	38523	21182	32298	34903	28554	41250	47576	21445	0	0	0	0	0	16578	2334	7704	10709	14092
CATG_HUMAN	Cathepsin G (CG) (EC 3.4.21.20) [Cleaved into: Cathepsin G, C-terminal truncated form]	28033	27872	27005	17339	20141	12607	13611	15394	15509	12295	32453	35975	46040	52858	42593	0	0	0	0	0
ANGI_HUMAN	Angiogenin (EC 3.1.27.-) (Ribonuclease 5) (RNase 5)	27890	39804	42379	24959	48162	40106	83823	66514	110021	99780	95802	111892	86070	67022	105492	0	0	0	0	0
CYTC_HUMAN	Cystatin-C (Cystatin-3) (Gamma-trace) (Neuroendocrine basic polypeptide) (Post-gamma-globulin)	27856	23634	27524	14696	26729	2642	1854	2896	1897	2789	14582	18905	7895	7471	9067	0	0	0	0	0
TRFL_HUMAN	Lactotransferrin (Lactoferrin) (EC 3.4.21.-) (Growth-inhibiting protein 12) (Talalactoferrin) [Cleaved into: Lactoferricin-H (Lfcin-H); Kaliocin-1; Lactoferroxin-A; Lactoferroxin-B; Lactoferroxin-C]	27360	32438	20779	23905	36116	37622	39754	35162	39850	31629	18165	29989	18281	10254	16836	0	0	0	0	0
APOA5_HUMAN	Apolipoprotein A-V (Apo-AV) (ApoA-V) (Apolipoprotein A5) (Regeneration-associated protein 3)	27255	27720	31975	20495	32026	19356	23605	25824	32433	30817	70742	49283	67707	54613	56950	0	0	0	0	0
PROC_BOVIN	Vitamin K-dependent protein C (EC 3.4.21.69) (Anticoagulant protein C) (Autoprothrombin IIA) (Blood coagulation factor XIV) [Cleaved into: Vitamin K-dependent protein C light chain; Vitamin K-dependent protein C heavy chain; Activation peptide]	26726	20466	24835	34187	35619	72408	63155	83432	70661	70772	0	0	0	0	0	35468	20651	326915	274004	31627
HV601_HUMAN	Immunoglobulin heavy variable 6-1	26285	23435	23287	45567	29462	11964	16937	13294	31584	14257	35938	60680	37177	26117	25606	0	0	0	0	0
ANG1_BOVIN	Angiogenin-1 (EC 3.1.27.-)	25911	28893	26446	17026	33739	7200	13204	12656	25929	10857	0	0	0	0	0	1072	1996	1022	1033	1110
AMBP_HUMAN	Protein AMBP (Protein HC) [Cleaved into: Alpha-1-microglobulin (EC 1.6.2.-) (Alpha-1 microglycoprotein) (Complex-forming glycoprotein heterogeneous in charge); Inter-alpha-trypsin inhibitor light chain (ITI-LC) (Bikunin) (EDC1) (HI-30) (Uronic-acid-rich protein); Trypstatin]	25857	26462	32704	16396	32987	12041	32438	25513	61935	36105	139958	127076	57171	29351	56920	0	0	0	0	0
CETP_HUMAN	Cholesteryl ester transfer protein (Lipid transfer protein I)	25801	28184	17088	18042	17833	10046	14289	13909	14482	14319	12368	3857	31621	2349	23939	0	0	0	0	0
AFAM_BOVIN	Afamin (Alpha-albumin)	25466	20290	19267	25627	22908	109644	117053	154443	68387	124604	0	0	0	0	0	15345	16177	44844	34042	17232
PEDF_HUMAN	Pigment epithelium-derived factor (PEDF) (Cell proliferation-inducing gene 35 protein) (EPC-1) (Serpin F1)	25465	26358	36049	23369	25323	4403	6371	6278	12592	8419	43974	49609	39342	40613	42217	0	0	0	0	0
CRAC1_HUMAN	Cartilage acidic protein 1 (68 kDa chondrocyte-expressed protein) (CEP-68) (ASPIC)	25137	25845	29740	17416	32201	9759	9257	10557	12762	10311	23941	27533	26447	29729	26012	0	0	0	0	0
ANGL3_HUMAN	Angiopoietin-related protein 3 (Angiopoietin-5) (ANG-5) (Angiopoietin-like protein 3) [Cleaved into: ANGPTL3(17-221); ANGPTL3(17-224)]	24851	29291	27517	28079	30792	29165	39290	39437	49239	39010	32360	33125	35763	25625	34953	0	0	0	0	0
TAGL2_BOVIN	Transgelin-2	24849	30737	27716	21320	20372	25820	23747	27237	20425	14754	0	0	0	0	0	9446	13565	69809	66922	11437
ALDOA_HUMAN	Fructose-bisphosphate aldolase A (EC 4.1.2.13) (Lung cancer antigen NY-LU-1) (Muscle-type aldolase)	24776	25760	22514	18607	21489	47842	48336	56605	66316	39745	18580	17150	20642	17735	11536	0	0	0	0	0
K1C16_HUMAN	Keratin, type I cytoskeletal 16 (Cytokeratin-16) (CK-16) (Keratin-16) (K16)	23912	28886	11976	12161	11703	15697	18440	11733	18819	18686	314205	39687	20423	38848	53329	0	0	0	0	0
CASB_BOVIN	Beta-casein [Cleaved into: Casoparan; Antioxidant peptide; Casohypotensin]	23898	30214	28709	35867	35845	31029	23696	33126	25020	34034	0	0	0	0	0	215192	104205	450797	172817	163140
IGLC7_HUMAN	Immunoglobulin lambda constant 7 (Ig lambda-7 chain C region)	23864	14713	13811	11329	9237	1802	7589	4977	7540	4748	21721	23904	1809	16037	3681	0	0	0	0	0
GSTA2_BOVIN	Glutathione S-transferase A2 (EC 2.5.1.18) (GST class-alpha member 2) (Glutathione S-transferase alpha-2)	23731	30409	30691	23575	21460	13518	19275	14554	21919	10701	0	0	0	0	0	50740	9126	28604	368202	68202
PRDX2_BOVIN	Peroxiredoxin-2 (EC 1.11.1.24) (Thioredoxin-dependent peroxiredoxin 2)	23651	21634	16496	22025	21236	31464	27922	34064	24420	23655	0	0	0	0	0	97738	17825	75213	64499	115183
CAH2_BOVIN	Carbonic anhydrase 2 (EC 4.2.1.1) (Carbonate dehydratase II) (Carbonic anhydrase II) (CA-II)	23442	20494	17612	19065	15090	23332	23971	20208	14360	18843	0	0	0	0	0	1341	884	1340	1531	1569
MTAP2_HUMAN	Microtubule-associated protein 2 (MAP-2)	23378	29384	25159	17270	20445	12220	16469	12012	13863	1920	1638	1646	1564	1601	2889	0	0	0	0	0
LCAT_HUMAN	Phosphatidylcholine-sterol acyltransferase (EC 2.3.1.43) (1-alkyl-2-acetylglycerophosphocholine esterase) (EC 3.1.1.47) (Lecithin-cholesterol acyltransferase) (Phospholipid-cholesterol acyltransferase) (Platelet-activating factor acetylhydrolase) (PAF acetylhydrolase)	23333	20251	23031	28849	28651	12395	18118	24991	27638	18968	14139	31679	13752	24841	12709	0	0	0	0	0
CO4B_HUMAN	Complement C4-B (Basic complement C4) (C3 and PZP-like alpha-2-macroglobulin domain-containing protein 3) [Cleaved into: Complement C4 beta chain; Complement C4-B alpha chain; C4a anaphylatoxin; C4b-B; C4d-B; Complement C4 gamma chain]	23230	18886	10272	14343	18121	13796	10623	15193	16729	11605	22526	18218	11429	13950	12827	0	0	0	0	0
MPRI_BOVIN	Cation-independent mannose-6-phosphate receptor (CI Man-6-P receptor) (CI-MPR) (M6PR) (300 kDa mannose 6-phosphate receptor) (MPR 300) (Insulin-like growth factor 2 receptor) (Insulin-like growth factor II receptor) (IGF-II receptor) (CD antigen CD222)	23227	17221	18356	19283	22066	55122	44923	44487	27846	45351	0	0	0	0	0	9276	9603	22435	25525	17895
PROZ_BOVIN	Vitamin K-dependent protein Z	22477	20389	18312	13016	15735	21039	30793	27616	30528	16038	0	0	0	0	0	16257	20698	90320	104170	28682
MDHC_BOVIN	Malate dehydrogenase, cytoplasmic (EC 1.1.1.37) (Aromatic alpha-keto acid reductase) (KAR) (EC 1.1.1.96) (Cytosolic malate dehydrogenase)	22427	23493	22120	43394	15283	65154	39428	38919	8975	6167	0	0	0	0	0	6418	2061	5829	8357	7456
CAN2_HUMAN	Calpain-2 catalytic subunit (EC 3.4.22.53) (Calcium-activated neutral proteinase 2) (CANP 2) (Calpain M-type) (Calpain large polypeptide L2) (Calpain-2 large subunit) (Millimolar-calpain) (M-calpain)	22422	19510	21403	22921	28423	14777	12461	16242	26127	11254	36169	49390	55123	29019	32462	0	0	0	0	0
CO6A3_HUMAN	Collagen alpha-3(VI) chain	22242	19839	18128	18126	18583	20196	24677	20346	20699	18939	15709	13544	12887	13607	12999	0	0	0	0	0
BHMT1_BOVIN	Betaine--homocysteine S-methyltransferase 1 (EC 2.1.1.5)	21893	18246	14420	10106	12817	25194	17506	22933	29951	14084	0	0	0	0	0	5073	2342	3452	8317	3165
FCN2_BOVIN	Ficolin-2 (Collagen/fibrinogen domain-containing protein 2) (Ficolin-B) (Ficolin-beta) (L-ficolin)	21866	24723	23377	12143	20519	13165	14169	14967	21921	6725	0	0	0	0	0	3350	3053	1998	3987	2566
HGFA_HUMAN	Hepatocyte growth factor activator (HGF activator) (HGFA) (EC 3.4.21.-) [Cleaved into: Hepatocyte growth factor activator short chain; Hepatocyte growth factor activator long chain]	21453	23903	22276	24956	30926	37377	40032	44320	33546	44501	13569	13949	14460	11368	12073	0	0	0	0	0
SFRP4_HUMAN	Secreted frizzled-related protein 4 (sFRP-4) (Frizzled protein, human endometrium) (FrpHE)	21228	22564	19408	11218	19463	4550	6880	4552	3340	3730	2867	1560	14320	8536	7325	0	0	0	0	0
CTHR1_HUMAN	Collagen triple helix repeat-containing protein 1	21065	15545	8532	14796	10643	19473	20921	19050	11302	10929	2633	4523	2564	2592	2632	0	0	0	0	0
LV223_HUMAN	Immunoglobulin lambda variable 2-23 (Ig lambda chain V-II region NEI)	21019	18096	7255	12497	5551	1798	3138	2303	10553	4770	12359	11909	8946	4976	9892	0	0	0	0	0
F13A_HUMAN	Coagulation factor XIII A chain (Coagulation factor XIIIa) (EC 2.3.2.13) (Protein-glutamine gamma-glutamyltransferase A chain) (Transglutaminase A chain)	20854	19945	19573	21638	22999	24514	40430	42434	44327	40045	10866	12227	10099	10706	8516	0	0	0	0	0
FLNB_HUMAN	Filamin-B (FLN-B) (ABP-278) (ABP-280 homolog) (Actin-binding-like protein) (Beta-filamin) (Filamin homolog 1) (Fh1) (Filamin-3) (Thyroid autoantigen) (Truncated actin-binding protein) (Truncated ABP)	20741	31337	26630	35427	35806	36898	19286	35798	19758	34417	34762	19959	33698	22199	19846	0	0	0	0	0
5MP2_HUMAN	eIF5-mimic protein 2 (Basic leucine zipper and W2 domain-containing protein 1) (Protein Orf)	20726	27731	27520	20259	23785	32175	19330	28747	19751	26917	17376	15270	15599	15595	14817	0	0	0	0	0
APOC3_HUMAN	Apolipoprotein C-III (Apo-CIII) (ApoC-III) (Apolipoprotein C3)	20556	11243	17414	12880	23851	16962	8198	12128	15837	10974	23522	14725	19985	17970	47331	0	0	0	0	0
K2C6A_HUMAN	Keratin, type II cytoskeletal 6A (Cytokeratin-6A) (CK-6A) (Cytokeratin-6D) (CK-6D) (Keratin-6A) (K6A) (Type-II keratin Kb6) (allergen Hom s 5)	20252	22929	11443	15841	7233	8526	6381	15064	20253	18580	60239	21147	20179	19217	16118	0	0	0	0	0
CATC_BOVIN	Dipeptidyl peptidase 1 (EC 3.4.14.1) (Cathepsin C) (Cathepsin J) (Dipeptidyl peptidase I) (DPP-I) (DPPI) (Dipeptidyl transferase) [Cleaved into: Dipeptidyl peptidase 1 exclusion domain chain (Dipeptidyl peptidase I exclusion domain chain); Dipeptidyl peptidase 1 heavy chain (Dipeptidyl peptidase I heavy chain); Dipeptidyl peptidase 1 light chain (Dipeptidyl peptidase I light chain)]	20109	16114	15606	13322	14363	22160	24041	20151	18327	22584	0	0	0	0	0	2147	1130	1839	2609	2156
PHLD_HUMAN	Phosphatidylinositol-glycan-specific phospholipase D (PI-G PLD) (EC 3.1.4.50) (Glycoprotein phospholipase D) (Glycosyl-phosphatidylinositol-specific phospholipase D) (GPI-PLD) (GPI-specific phospholipase D)	19542	16791	35455	20219	25847	5516	11060	15244	23451	16409	23423	44167	24385	6667	8036	0	0	0	0	0
BPT2_BOVIN	Spleen trypsin inhibitor I (SI-I) [Cleaved into: Spleen trypsin inhibitor II (SI-II); Spleen trypsin inhibitor III (SI-III)]	19309	23048	20722	31504	35531	20951	43246	31722	27100	28424	0	0	0	0	0	30198	16670	121798	99596	23055
MASP1_HUMAN	Mannan-binding lectin serine protease 1 (EC 3.4.21.-) (Complement factor MASP-3) (Complement-activating component of Ra-reactive factor) (Mannose-binding lectin-associated serine protease 1) (MASP-1) (Mannose-binding protein-associated serine protease) (Ra-reactive factor serine protease p100) (RaRF) (Serine protease 5) [Cleaved into: Mannan-binding lectin serine protease 1 heavy chain; Mannan-bi…	19243	25622	26920	16714	19095	19765	37523	31367	37171	40465	26317	27069	19401	23895	22770	0	0	0	0	0
LDHA_BOVIN	L-lactate dehydrogenase A chain (LDH-A) (EC 1.1.1.27) (LDH muscle subunit) (LDH-M)	18740	15976	16709	16351	16749	21711	17361	21498	19347	19536	0	0	0	0	0	20595	12022	60680	210430	27263
A2GL_HUMAN	Leucine-rich alpha-2-glycoprotein (LRG)	18532	23153	39083	42609	41186	14944	11586	17492	31110	14296	31133	60254	19798	13736	11775	0	0	0	0	0
KV401_HUMAN	Immunoglobulin kappa variable 4-1 (Ig kappa chain V-IV region B17) (Ig kappa chain V-IV region JI) (Ig kappa chain V-IV region Len) (Ig kappa chain V-IV region STH)	18359	14673	26969	24209	22895	7154	9798	10101	24235	10016	9840	40792	13636	7616	12115	0	0	0	0	0
CFAI_HUMAN	Complement factor I (EC 3.4.21.45) (C3B/C4B inactivator) [Cleaved into: Complement factor I heavy chain; Complement factor I light chain]	18076	15739	16678	14825	16355	76607	166838	142775	101493	205455	8102	4405	6274	5105	7253	0	0	0	0	0
HABP2_HUMAN	Hyaluronan-binding protein 2 (EC 3.4.21.-) (Factor VII-activating protease) (Factor seven-activating protease) (FSAP) (Hepatocyte growth factor activator-like protein) (Plasma hyaluronan-binding protein) [Cleaved into: Hyaluronan-binding protein 2 50 kDa heavy chain; Hyaluronan-binding protein 2 50 kDa heavy chain alternate form; Hyaluronan-binding protein 2 27 kDa light chain; Hyaluronan-binding…	17687	15235	38311	12883	20914	11181	11673	22906	30782	17866	28358	47563	18150	26659	35886	0	0	0	0	0
IBP4_BOVIN	Insulin-like growth factor-binding protein 4 (IBP-4) (IGF-binding protein 4) (IGFBP-4)	17579	20483	26148	12502	36023	49838	93327	117604	147589	43610	0	0	0	0	0	13561	2894	310642	233042	18360
TITIN_HUMAN	Titin (EC 2.7.11.1) (Connectin) (Rhabdomyosarcoma antigen MU-RMS-40.14)	17566	23288	25364	11364	11845	4523	9205	16313	19904	15480	9292	17979	12264	5880	9086	0	0	0	0	0
LYSCN_BOVIN	Lysozyme C, non-stomach isozyme (EC 3.2.1.17) (1,4-beta-N-acetylmuramidase C)	17521	13993	12619	14706	14245	20394	18621	18858	16006	17530	0	0	0	0	0	2252	951	1978	1103	1895
LTBP1_HUMAN	Latent-transforming growth factor beta-binding protein 1 (LTBP-1) (Transforming growth factor beta-1-binding protein 1) (TGF-beta1-BP-1)	17506	12078	15173	11152	12080	3849	5833	5793	6725	5416	14604	14325	14218	18268	16765	0	0	0	0	0
THYG_BOVIN	Thyroglobulin (Tg)	17204	10840	12028	16770	15270	24666	20716	18703	17700	16979	0	0	0	0	0	2505	2461	2308	1978	2905
C4BPA_HUMAN	C4b-binding protein alpha chain (C4bp) (Proline-rich protein) (PRP)	17095	15917	19027	14554	22613	10319	19480	19772	65567	25358	68277	75173	38349	15124	34142	0	0	0	0	0
BPIB1_HUMAN	BPI fold-containing family B member 1 (Long palate, lung and nasal epithelium carcinoma-associated protein 1) (von Ebner minor salivary gland protein) (VEMSGP)	17071	20550	10379	9455	13617	13200	14929	23581	22527	21338	17421	21612	33007	24481	20732	0	0	0	0	0
KPRP_HUMAN	Keratinocyte proline-rich protein (hKPRP)	17068	27574	14465	4991	13304	7577	15490	14261	27359	11032	21371	29342	10765	21099	17684	0	0	0	0	0
KRT85_HUMAN	Keratin, type II cuticular Hb5 (Hair keratin K2.12) (Keratin-85) (K85) (Type II hair keratin Hb5) (Type-II keratin Kb25)	15977	14996	16799	12609	61299	2803	4799	3739	2580	3334	9067	1557	6335	10413	5908	0	0	0	0	0
ZYX_HUMAN	Zyxin (Zyxin-2)	15515	15873	18666	8878	16723	2323	3398	2262	3264	5201	8153	11917	8505	15926	17235	0	0	0	0	0
CCL14_HUMAN	C-C motif chemokine 14 (Chemokine CC-1/CC-3) (HCC-1/HCC-3) (HCC-1(1-74)) (NCC-2) (Small-inducible cytokine A14) [Cleaved into: HCC-1(3-74); HCC-1(4-74); HCC-1(9-74)]	15475	16216	15200	13619	18895	9260	10158	8585	13118	9975	14169	19097	22930	16315	16713	0	0	0	0	0
REG1_BOVIN	Regakine-1	15428	17651	24119	4570	20603	61187	97861	110455	94077	111478	0	0	0	0	0	14356	2696	236248	213711	18182
FA10_BOVIN	Coagulation factor X (EC 3.4.21.6) (Stuart factor) [Cleaved into: Factor X light chain; Factor X heavy chain; Activated factor Xa heavy chain]	15150	14517	19128	14990	18028	21018	17262	21399	20101	19951	0	0	0	0	0	15728	14261	87613	98955	15711
LBP_BOVIN	Lipopolysaccharide-binding protein (LBP)	14794	17901	16741	17482	15862	21248	19659	19482	18129	20854	0	0	0	0	0	234602	152061	252480	450294	305491
C1S_HUMAN	Complement C1s subcomponent (EC 3.4.21.42) (C1 esterase) (Complement component 1 subcomponent s) [Cleaved into: Complement C1s subcomponent heavy chain; Complement C1s subcomponent light chain]	14734	15448	26618	25758	20460	3913	9631	9398	19486	7829	30558	48027	25009	19831	20556	0	0	0	0	0
ATL4_HUMAN	ADAMTS-like protein 4 (ADAMTSL-4) (Thrombospondin repeat-containing protein 1)	14537	15772	10380	11461	10854	12165	13664	13307	12566	12178	14352	12407	16408	17592	13192	0	0	0	0	0
CTHL1_BOVIN	Cathelicidin-1 (Bactenecin-1) (Bac1) (Cyclic dodecapeptide)	14174	15365	12838	12420	10839	18895	25257	20421	15138	20004	0	0	0	0	0	25073	9712	140483	195569	15333
APOC4_BOVIN	Apolipoprotein C-IV (Apo-CIV) (ApoC-IV) (Apolipoprotein C4)	14144	13531	21622	26378	24793	19410	14803	22577	15070	23916	0	0	0	0	0	22175	13342	65748	137509	51023
IGF2_BOVIN	Insulin-like growth factor II (IGF-II) (Erythrotropin) [Cleaved into: Insulin-like growth factor II; Preptin]	13645	7610	5745	6738	35414	108764	10284	92906	180539	11777	0	0	0	0	0	4811	8912	5185	8798	137629
CLC11_HUMAN	C-type lectin domain family 11 member A (C-type lectin superfamily member 3) (Lymphocyte secreted C-type lectin) (Osteolectin) (Stem cell growth factor) (p47)	13557	13402	12004	13195	14450	14765	7432	14010	11043	13932	1732	1258	1827	1626	1465	0	0	0	0	0
FRIL_BOVIN	Ferritin light chain (Ferritin L subunit)	13537	18852	15386	7877	9322	19148	12169	8786	11209	8867	0	0	0	0	0	273706	25334	212637	212945	209050
IBP6_BOVIN	Insulin-like growth factor-binding protein 6 (IBP-6) (IGF-binding protein 6) (IGFBP-6)	13072	14925	13578	7366	11587	6245	8603	8459	12419	7371	0	0	0	0	0	6720	6478	9971	8287	7158
CPN2_HUMAN	Carboxypeptidase N subunit 2 (Carboxypeptidase N 83 kDa chain) (Carboxypeptidase N large subunit) (Carboxypeptidase N polypeptide 2) (Carboxypeptidase N regulatory subunit)	13031	13045	13067	13982	12119	4078	4736	5425	6335	6685	20244	23770	8380	3909	9836	0	0	0	0	0
MMP9_BOVIN	Matrix metalloproteinase-9 (MMP-9) (EC 3.4.24.35) (92 kDa gelatinase) (92 kDa type IV collagenase) (Gelatinase B) (GELB)	12927	13995	14671	10710	14291	7505	5549	9009	8678	3810	0	0	0	0	0	7894	4112	33243	12505	34988
FINC_BOVIN	Fibronectin (FN) [Cleaved into: Anastellin]	12844	11834	11581	12744	11780	17150	15622	15398	13035	14384	0	0	0	0	0	445824	147989	376519	529326	609034
B3AT_HUMAN	Band 3 anion transport protein (Anion exchange protein 1) (AE 1) (Anion exchanger 1) (Solute carrier family 4 member 1) (CD antigen CD233)	12825	12431	16832	9478	13495	14716	15307	18679	25037	20097	21223	20738	22956	25798	27888	0	0	0	0	0
CCL18_HUMAN	C-C motif chemokine 18 (Alternative macrophage activation-associated CC chemokine 1) (AMAC-1) (CC chemokine PARC) (Dendritic cell chemokine 1) (DC-CK1) (Macrophage inflammatory protein 4) (MIP-4) (Pulmonary and activation-regulated chemokine) (Small-inducible cytokine A18) [Cleaved into: CCL18(1-68); CCL18(3-69); CCL18(4-69)]	12658	12624	16506	9221	15487	10642	28834	22721	22004	22943	26200	16608	13590	10594	17613	0	0	0	0	0
SEPP1_BOVIN	Selenoprotein P (SeP) (Selenoprotein P-like protein)	12656	24162	16203	9348	10275	22190	32403	48677	100814	34012	0	0	0	0	0	19903	16929	112385	81690	18082
PLXB2_HUMAN	Plexin-B2 (MM1)	12571	8314	6486	8757	8910	10373	14099	10465	10998	11866	2137	3172	2237	2364	1961	0	0	0	0	0
PCOC1_HUMAN	Procollagen C-endopeptidase enhancer 1 (Procollagen COOH-terminal proteinase enhancer 1) (PCPE-1) (Procollagen C-proteinase enhancer 1) (Type 1 procollagen C-proteinase enhancer protein) (Type I procollagen COOH-terminal proteinase enhancer)	12446	13370	17246	14005	21731	7325	9348	6467	9634	10149	9475	19194	12725	9362	16470	0	0	0	0	0
URP2_BOVIN	Fermitin family homolog 3 (Kindlin-3) (Unc-112-related protein 2)	12204	11069	10904	8366	9701	11200	12738	9282	12276	8524	0	0	0	0	0	372421	190271	186913	642314	679720
VWF_BOVIN	von Willebrand factor (vWF)	12176	11683	8710	6782	7478	7852	12374	6903	10780	7672	0	0	0	0	0	6980	11009	24582	25802	8207
IBP2_BOVIN	Insulin-like growth factor-binding protein 2 (IBP-2) (IGF-binding protein 2) (IGFBP-2)	12116	19744	16144	16297	17035	33553	61563	79094	94013	57734	0	0	0	0	0	15767	8408	228423	186941	11851
ATS13_HUMAN	A disintegrin and metalloproteinase with thrombospondin motifs 13 (ADAM-TS 13) (ADAM-TS13) (ADAMTS-13) (EC 3.4.24.87) (von Willebrand factor-cleaving protease) (vWF-CP) (vWF-cleaving protease)	12092	7067	9259	11471	11836	21298	19364	17831	17243	16467	1856	2398	1838	2128	1886	0	0	0	0	0
TFR1_HUMAN	Transferrin receptor protein 1 (TR) (TfR) (TfR1) (Trfr) (T9) (p90) (CD antigen CD71) [Cleaved into: Transferrin receptor protein 1, serum form (sTfR)]	11921	1721	2472	10950	8963	11423	5973	11766	6440	3957	1263	1180	1192	1143	1075	0	0	0	0	0
DESP_HUMAN	Desmoplakin (DP) (250/210 kDa paraneoplastic pemphigus antigen)	11908	14022	12079	7690	8933	7577	17254	7850	29645	5618	39925	22358	10918	26305	13450	0	0	0	0	0
K1C17_HUMAN	Keratin, type I cytoskeletal 17 (39.1) (Cytokeratin-17) (CK-17) (Keratin-17) (K17)	11796	12134	7905	4199	5820	6692	10553	5412	6108	6464	97469	20608	20842	30573	20094	0	0	0	0	0
TSP4_BOVIN	Thrombospondin-4	11487	10983	15913	13528	14333	15651	15472	19278	19545	18225	0	0	0	0	0	14375	9811	57246	109459	20246
IPSP_HUMAN	Plasma serine protease inhibitor (Acrosomal serine protease inhibitor) (Plasminogen activator inhibitor 3) (PAI-3) (PAI3) (Protein C inhibitor) (PCI) (Serpin A5)	11439	5972	7538	7085	15875	10423	5614	6758	11094	6436	8205	28186	7837	7358	8707	0	0	0	0	0
PPIP2_HUMAN	Proline-serine-threonine phosphatase-interacting protein 2 (PEST phosphatase-interacting protein 2)	11370	6295	9188	6645	12933	6801	6123	5605	7181	3640	8839	12276	12902	7641	7895	0	0	0	0	0
RCN1_HUMAN	Reticulocalbin-1	11079	12066	8164	9910	10781	6232	10990	10524	3444	10151	1458	1349	1302	864	1529	0	0	0	0	0
ITA2B_HUMAN	Integrin alpha-IIb (GPalpha IIb) (GPIIb) (Platelet membrane glycoprotein IIb) (CD antigen CD41) [Cleaved into: Integrin alpha-IIb heavy chain; Integrin alpha-IIb light chain, form 1; Integrin alpha-IIb light chain, form 2]	11071	8502	11587	9450	11731	11306	16059	14898	25370	15536	8381	20089	14224	17898	14616	0	0	0	0	0
SIAT1_HUMAN	Beta-galactoside alpha-2,6-sialyltransferase 1 (Alpha 2,6-ST 1) (EC 2.4.3.1) (B-cell antigen CD75) (CMP-N-acetylneuraminate-beta-galactosamide-alpha-2,6-sialyltransferase 1) (ST6Gal I) (ST6GalI) (Sialyltransferase 1)	10948	12675	14823	8929	10618	3384	4991	5873	7038	4604	17509	16826	19962	18066	19010	0	0	0	0	0
CASA2_BOVIN	Alpha-S2-casein [Cleaved into: Casocidin-1 (Casocidin-I)]	10803	8388	6427	6773	10952	4498	4812	4869	9790	5038	0	0	0	0	0	11855	6490	96367	5601	4317
TFPI1_HUMAN	Tissue factor pathway inhibitor (TFPI) (Extrinsic pathway inhibitor) (EPI) (Lipoprotein-associated coagulation inhibitor) (LACI)	10737	8827	8045	10711	38686	2372	6145	1975	1712	4237	6786	12379	9218	5334	8122	0	0	0	0	0
OMD_BOVIN	Osteomodulin (Keratan sulfate proteoglycan osteomodulin) (KSPG osteomodulin) (Osteoadherin) (OSAD)	10699	8137	7013	8176	9017	19554	19706	17330	16107	13004	0	0	0	0	0	27288	1774	31139	23647	27255
GAPR1_HUMAN	Golgi-associated plant pathogenesis-related protein 1 (GAPR-1) (Golgi-associated PR-1 protein) (Glioma pathogenesis-related protein 2) (GliPR 2)	10673	8221	12135	7681	8102	22637	22353	31947	32872	17137	1760	2856	1660	2626	1272	0	0	0	0	0
COL11_BOVIN	Collectin-11 (Collectin kidney protein 1) (CL-K1)	10385	9068	9739	10609	8687	15155	9995	14026	10966	15246	0	0	0	0	0	170363	93519	290884	191527	177376
ENOA_BOVIN	Alpha-enolase (EC 4.2.1.11) (2-phospho-D-glycerate hydro-lyase) (Enolase 1) (HAP47) (Non-neural enolase) (NNE) (Phosphopyruvate hydratase)	10332	6841	7060	10456	14751	15150	13307	14175	11685	15972	0	0	0	0	0	45406	6659	94647	177620	55426
C1QA_BOVIN	Complement C1q subcomponent subunit A	10326	10463	8862	5791	9587	17404	13278	21158	27435	10587	0	0	0	0	0	51593	24664	25843	20419	49861
MASP2_HUMAN	Mannan-binding lectin serine protease 2 (EC 3.4.21.104) (MBL-associated serine protease 2) (Mannose-binding protein-associated serine protease 2) (MASP-2) [Cleaved into: Mannan-binding lectin serine protease 2 A chain; Mannan-binding lectin serine protease 2 B chain]	10261	6628	12270	12751	14133	3688	9504	8709	8695	16430	22214	31358	26916	10533	22541	0	0	0	0	0
S10A8_BOVIN	Protein S100-A8 (BEE11) (Calgranulin-A) (Neutrophil cytosolic 7 kDa protein) (P7) (S100 calcium-binding protein A8)	10237	9683	9209	6154	6721	25346	21129	20397	34170	8452	0	0	0	0	0	5820	5562	22757	18882	12888
LV319_HUMAN	Immunoglobulin lambda variable 3-19 (Ig lambda chain V-III region SH)	9976	8873	14118	3433	12772	2616	4822	3424	12854	6840	18358	19565	8904	10093	9935	0	0	0	0	0
K2C1B_HUMAN	Keratin, type II cytoskeletal 1b (Cytokeratin-1B) (CK-1B) (Keratin-77) (K77) (Type-II keratin Kb39)	9950	14599	8557	3753	8855	8531	16917	16423	23459	6916	13010	16559	7088	12465	11244	0	0	0	0	0
ENOA_HUMAN	Alpha-enolase (EC 4.2.1.11) (2-phospho-D-glycerate hydro-lyase) (C-myc promoter-binding protein) (Enolase 1) (MBP-1) (MPB-1) (Non-neural enolase) (NNE) (Phosphopyruvate hydratase) (Plasminogen-binding protein)	9898	11396	11817	8666	11445	12366	6658	8757	7925	6400	15539	12661	12355	12207	14971	0	0	0	0	0
CFAD_BOVIN	Complement factor D (EC 3.4.21.46) (Adipsin) (C3 convertase activator) (Properdin factor D)	9715	10705	8599	7823	8853	8260	12052	7421	10387	7508	0	0	0	0	0	13294	12842	234409	278454	11384
LECT2_BOVIN	Leukocyte cell-derived chemotaxin-2 (LECT-2) (bLECT2) (Chondromodulin II) (ChM-II) (bChM-II)	9675	11396	10588	4369	7477	10643	7463	9798	12448	4639	0	0	0	0	0	3508	4942	2740	4712	3886
MYLK_BOVIN	Myosin light chain kinase, smooth muscle (MLCK) (smMLCK) (EC 2.7.11.18) (Telokin) [Cleaved into: Myosin light chain kinase, smooth muscle, deglutamylated form]	9541	10263	6650	6854	6810	6214	10591	7007	9450	9549	0	0	0	0	0	70429	21181	54578	64391	57027
CFAH_HUMAN	Complement factor H (H factor 1)	9534	12187	17689	19643	23217	7137	12164	14485	31231	20808	35990	33494	13703	10808	15414	0	0	0	0	0
LGUL_HUMAN	Lactoylglutathione lyase (EC 4.4.1.5) (Aldoketomutase) (Glyoxalase I) (Glx I) (Ketone-aldehyde mutase) (Methylglyoxalase) (S-D-lactoylglutathione methylglyoxal lyase)	9488	6137	6306	5153	7110	9970	9849	7187	9233	6157	1204	1407	1197	1128	960	0	0	0	0	0
RNAS4_HUMAN	Ribonuclease 4 (RNase 4) (EC 3.1.27.-)	9473	11218	11605	8413	11388	7073	13190	9202	15242	20775	56042	33554	29295	31724	42970	0	0	0	0	0
CD109_HUMAN	CD109 antigen (150 kDa TGF-beta-1-binding protein) (C3 and PZP-like alpha-2-macroglobulin domain-containing protein 7) (Platelet-specific Gov antigen) (p180) (r150) (CD antigen CD109)	9323	10875	7445	11480	9866	20064	20147	16512	15384	14319	1045	1924	1072	1821	1009	0	0	0	0	0
SAHH_BOVIN	Adenosylhomocysteinase (AdoHcyase) (EC 3.13.2.1) (S-adenosyl-L-homocysteine hydrolase)	9288	8582	7902	6719	9365	7496	10329	6968	9623	6973	0	0	0	0	0	69891	14794	134329	138511	199586
AFAM_HUMAN	Afamin (Alpha-albumin) (Alpha-Alb)	9194	7251	13607	12694	13102	8206	7311	8381	23076	11110	27966	28252	9623	8425	4498	0	0	0	0	0
S10A8_HUMAN	Protein S100-A8 (Calgranulin-A) (Calprotectin L1L subunit) (Cystic fibrosis antigen) (CFAG) (Leukocyte L1 complex light chain) (Migration inhibitory factor-related protein 8) (MRP-8) (p8) (S100 calcium-binding protein A8) (Urinary stone protein band A)	8969	8289	9987	4993	8372	7404	9146	10193	14211	13558	34339	42193	41089	33276	37913	0	0	0	0	0
PAFA_BOVIN	Platelet-activating factor acetylhydrolase (PAF acetylhydrolase) (EC 3.1.1.47) (1-alkyl-2-acetylglycerophosphocholine esterase) (2-acetyl-1-alkylglycerophosphocholine esterase) (LDL-associated phospholipase A2) (LDL-PLA(2)) (PAF 2-acylhydrolase)	8947	7862	6793	11293	9969	10520	7506	11868	9103	10037	0	0	0	0	0	890	5281	605	1487	2491
TPM4_HUMAN	Tropomyosin alpha-4 chain (TM30p1) (Tropomyosin-4)	8913	6718	6617	7076	7457	8542	9250	7707	6637	7685	2451	2619	2013	2660	2226	0	0	0	0	0
TENX_HUMAN	Tenascin-X (TN-X) (Hexabrachion-like protein)	8842	9180	10528	9863	9235	11472	9690	12369	9187	11332	9579	7212	9357	8683	7657	0	0	0	0	0
CD9_BOVIN	CD9 antigen (CD antigen CD9)	8823	6499	6268	5733	4296	6565	7246	10327	12503	7189	0	0	0	0	0	17336	13588	17058	20880	22966
ECM1_HUMAN	Extracellular matrix protein 1 (Secretory component p85)	8662	10120	10347	5386	7014	9987	14070	12092	16734	10551	2947	5280	2640	5030	3026	0	0	0	0	0
ALDOB_BOVIN	Fructose-bisphosphate aldolase B (EC 4.1.2.13) (Liver-type aldolase)	8630	8884	8013	8334	5251	16153	14541	17002	14180	8123	0	0	0	0	0	747	1395	708	2971	1100
ITB3_HUMAN	Integrin beta-3 (Platelet membrane glycoprotein IIIa) (GPIIIa) (CD antigen CD61)	8538	7101	8143	5409	6592	6127	9717	8058	13756	11220	4802	7424	5746	5849	6656	0	0	0	0	0
FINC_HUMAN	Fibronectin (FN) (Cold-insoluble globulin) (CIG) [Cleaved into: Anastellin; Ugl-Y1; Ugl-Y2; Ugl-Y3]	8485	8007	10852	6325	31283	5764	6524	7494	7665	7788	9017	17485	13252	7786	58749	0	0	0	0	0
CO6_BOVIN	Complement component C6	8459	7909	7719	5361	6339	5741	9048	5330	8860	5988	0	0	0	0	0	9602	6510	11788	57732	12237
PROS_HUMAN	Vitamin K-dependent protein S	8279	6538	18364	20108	23038	8181	8089	8805	20268	7740	15812	43543	17382	5487	11265	0	0	0	0	0
ANXA5_BOVIN	Annexin A5 (Anchorin CII) (Annexin V) (Annexin-5) (Calphobindin I) (CPB-I) (Endonexin II) (Lipocortin V) (Placental anticoagulant protein 4) (Placental anticoagulant protein I) (PAP-I) (Thromboplastin inhibitor) (Vascular anticoagulant-alpha) (VAC-alpha)	8270	4826	5819	6242	10309	8134	7399	8615	9869	6435	0	0	0	0	0	40445	16703	33367	32265	35645
SNED1_HUMAN	Sushi, nidogen and EGF-like domain-containing protein 1 (Insulin-responsive sequence DNA-binding protein 1) (IRE-BP1)	8257	5760	6699	9395	4361	5096	2100	3185	2216	3226	5860	5657	6551	2270	3309	0	0	0	0	0
S10A9_HUMAN	Protein S100-A9 (Calgranulin-B) (Calprotectin L1H subunit) (Leukocyte L1 complex heavy chain) (Migration inhibitory factor-related protein 14) (MRP-14) (p14) (S100 calcium-binding protein A9)	8181	4515	8429	6659	8356	5870	9286	9988	9762	8640	9845	24108	23389	10913	15822	0	0	0	0	0
IBP2_HUMAN	Insulin-like growth factor-binding protein 2 (IBP-2) (IGF-binding protein 2) (IGFBP-2)	8142	10850	10946	4354	8412	1210	7518	1827	8255	8555	19633	15592	15051	11893	23829	0	0	0	0	0
PROF1_HUMAN	Profilin-1 (Epididymis tissue protein Li 184a) (Profilin I)	7952	8144	10332	7756	11148	5155	5615	6799	7024	7751	12994	9583	12068	12430	12612	0	0	0	0	0
CO6_HUMAN	Complement component C6	7941	8672	13447	9929	12359	5120	4600	6327	8266	5392	14395	15937	18319	12569	15103	0	0	0	0	0
DIK2B_BOVIN	Divergent protein kinase domain 2B (Deleted in autism-related protein 1 homolog)	7910	9253	9510	8020	8004	10493	6199	8273	10313	8700	0	0	0	0	0	14221	13177	104822	127717	20238
COBA2_BOVIN	Collagen alpha-2(XI) chain	7906	7481	8591	7317	8179	9905	9528	7909	6958	5099	0	0	0	0	0	900	1108	804	989	694
RL22_HUMAN	60S ribosomal protein L22 (EBER-associated protein) (EAP) (Epstein-Barr virus small RNA-associated protein) (Heparin-binding protein HBp15) (Large ribosomal subunit protein eL22)	7783	3678	3791	1895	4656	2866	3540	6027	3442	3805	5073	2200	1553	7452	1496	0	0	0	0	0
FILA2_HUMAN	Filaggrin-2 (FLG-2) (Intermediate filament-associated and psoriasis-susceptibility protein) (Ifapsoriasin)	7725	10114	10698	6154	4656	6953	9052	10267	14259	7668	12700	18975	7794	11510	7714	0	0	0	0	0
STIP1_BOVIN	Stress-induced-phosphoprotein 1 (STI1) (Hsc70/Hsp90-organizing protein) (Hop)	7678	9769	8642	7117	7774	10919	8247	13962	16105	3966	0	0	0	0	0	28657	7026	34829	63859	41661
BLVRB_BOVIN	Flavin reductase (NADPH) (FR) (EC 1.5.1.30) (Biliverdin reductase B) (BVR-B) (EC 1.3.1.24) (Biliverdin-IX beta-reductase) (Green heme-binding protein) (GHBP) (NADPH-dependent diaphorase) (NADPH-flavin reductase) (FLR)	7642	8030	9457	8974	8561	17820	15991	19761	22654	9210	0	0	0	0	0	113766	25887	120747	84414	114894
PGM1_BOVIN	Phosphoglucomutase-1 (PGM 1) (EC 5.4.2.2) (Glucose phosphomutase 1)	7635	8668	7841	8038	8710	10404	7233	10058	8413	10419	0	0	0	0	0	45077	5432	62107	95703	51336
CSRP1_HUMAN	Cysteine and glycine-rich protein 1 (Cysteine-rich protein 1) (CRP) (CRP1) (Epididymis luminal protein 141) (HEL-141)	7435	7441	8398	6388	5601	3566	4304	4141	5959	4123	2205	3330	3270	3844	1022	0	0	0	0	0
MBP_HUMAN	Myelin basic protein (MBP) (Myelin A1 protein) (Myelin membrane encephalitogenic protein)	7428	6099	7287	5004	4113	3429	3561	3003	3867	5176	13525	9956	10722	14771	10917	0	0	0	0	0
PRDX6_BOVIN	Peroxiredoxin-6 (EC 1.11.1.27) (1-Cys peroxiredoxin) (1-Cys PRX) (Acidic calcium-independent phospholipase A2) (aiPLA2) (EC 3.1.1.4) (Antioxidant protein 2) (Ciliary body glutathione peroxidase) (Glutathione-dependent peroxiredoxin) (Lysophosphatidylcholine acyltransferase 5) (LPC acyltransferase 5) (LPCAT-5) (Lyso-PC acyltransferase 5) (EC 2.3.1.23) (Non-selenium glutathione peroxidase) (NSGPx) …	7421	5484	4450	7421	7419	11550	9880	8681	7747	8317	0	0	0	0	0	97293	7525	185319	175238	189440
TENA_HUMAN	Tenascin (TN) (Cytotactin) (GMEM) (GP 150-225) (Glioma-associated-extracellular matrix antigen) (Hexabrachion) (JI) (Myotendinous antigen) (Neuronectin) (Tenascin-C) (TN-C)	7271	5935	6252	4721	5453	4993	7909	6202	7092	6863	4254	3333	4144	3725	4034	0	0	0	0	0
FCN3_HUMAN	Ficolin-3 (Collagen/fibrinogen domain-containing lectin 3 p35) (Collagen/fibrinogen domain-containing protein 3) (Hakata antigen)	7201	6320	11255	11395	13534	2973	2934	4971	10686	2971	13364	27118	13263	8372	11612	0	0	0	0	0
GPX3_HUMAN	Glutathione peroxidase 3 (GPx-3) (GSHPx-3) (EC 1.11.1.9) (Extracellular glutathione peroxidase) (Plasma glutathione peroxidase) (GPx-P) (GSHPx-P)	7183	8657	11140	7624	12154	1331	2112	1161	3114	1668	20082	20438	17951	14943	17622	0	0	0	0	0
APOF_HUMAN	Apolipoprotein F (Apo-F) (Lipid transfer inhibitor protein) (LTIP)	7162	9228	10693	7416	8662	5114	6235	3822	4489	6270	13451	12739	6848	8650	13931	0	0	0	0	0
HORN_HUMAN	Hornerin	7147	6921	5718	5157	4919	6231	6873	5241	10374	5395	6695	10469	9210	5888	7411	0	0	0	0	0
ESTD_BOVIN	S-formylglutathione hydrolase (FGH) (EC 3.1.2.12) (Esterase D)	7070	7641	8140	3340	4568	4306	7513	3749	7255	3987	0	0	0	0	0	14320	6079	40425	125361	16291
ST1E1_BOVIN	Sulfotransferase 1E1 (ST1E1) (EC 2.8.2.4) (Estrogen sulfotransferase) (Sulfotransferase, estrogen-preferring)	7048	7890	6335	4913	6491	6275	7210	7640	6470	6254	0	0	0	0	0	17280	4503	21015	65832	24371
CO2_HUMAN	Complement C2 (EC 3.4.21.43) (C3/C5 convertase) [Cleaved into: Complement C2b fragment; Complement C2a fragment]	7040	9444	11355	19039	10100	4515	4872	3588	15538	2853	6857	8523	6801	8284	6351	0	0	0	0	0
LRC15_HUMAN	Leucine-rich repeat-containing protein 15 (Leucine-rich repeat protein induced by beta-amyloid homolog) (hLib)	7030	2539	999	1345	1261	1046	18901	1458	991	1456	55678	882	1360	34746	1464	0	0	0	0	0
IGHD_HUMAN	Immunoglobulin heavy constant delta (Ig delta chain C region) (Ig delta chain C region NIG-65) (Ig delta chain C region WAH)	6972	7030	8477	9279	9432	2637	4482	4430	9225	2884	9337	14119	5929	3637	3900	0	0	0	0	0
CO8G_HUMAN	Complement component C8 gamma chain	6945	5718	10270	8344	10336	3121	3618	4786	6440	5523	10468	12959	8243	9353	3384	0	0	0	0	0
LDHA_HUMAN	L-lactate dehydrogenase A chain (LDH-A) (EC 1.1.1.27) (Cell proliferation-inducing gene 19 protein) (LDH muscle subunit) (LDH-M) (Renal carcinoma antigen NY-REN-59)	6923	8889	6552	5797	5488	4609	5730	5115	7023	4949	6686	9314	7950	8011	6575	0	0	0	0	0
CO5A1_HUMAN	Collagen alpha-1(V) chain	6886	4870	5736	5393	5143	7211	5786	6115	3769	8704	2883	2839	2672	3394	2769	0	0	0	0	0
HA1B_BOVIN	BOLA class I histocompatibility antigen, alpha chain BL3-7	6676	3033	3525	4515	6240	7923	5698	7892	6593	3013	0	0	0	0	0	30563	10103	42702	29671	31058
MA2B1_BOVIN	Lysosomal alpha-mannosidase (Laman) (EC 3.2.1.24) (Lysosomal acid alpha-mannosidase) (Mannosidase alpha class 2B member 1) (Mannosidase alpha-B) [Cleaved into: Lysosomal alpha-mannosidase A peptide; Lysosomal alpha-mannosidase B peptide; Lysosomal alpha-mannosidase C peptide; Lysosomal alpha-mannosidase D peptide; Lysosomal alpha-mannosidase E peptide]	6620	4042	4354	7383	8537	15784	7804	5582	9443	5367	0	0	0	0	0	8180	1866	4958	7219	8429
F13A_BOVIN	Coagulation factor XIII A chain (Coagulation factor XIIIa) (EC 2.3.2.13) (Protein-glutamine gamma-glutamyltransferase A chain) (Transglutaminase A chain)	6597	6062	6294	5375	5715	7465	8310	8019	8287	7225	0	0	0	0	0	400119	299750	238376	551729	413712
CHST3_HUMAN	Carbohydrate sulfotransferase 3 (EC 2.8.2.17) (EC 2.8.2.21) (Chondroitin 6-O-sulfotransferase 1) (C6ST-1) (Chondroitin 6-sulfotransferase) (C6ST) (Galactose/N-acetylglucosamine/N-acetylglucosamine 6-O-sulfotransferase 0) (GST-0)	6524	7344	5644	5844	5163	5571	7840	4659	5152	7765	879	628	799	631	819	0	0	0	0	0
DDBX_BOVIN	Dihydrodiol dehydrogenase 3 (EC 1.-.-.-) (Prostaglandin F synthase)	6523	6895	5265	5122	5361	5853	7027	5359	6268	4349	0	0	0	0	0	27381	7573	22808	62569	15435
MIME_BOVIN	Mimecan (Osteoglycin) [Cleaved into: Corneal keratan sulfate proteoglycan 25 core protein (KSPG25 protein); Osteoinductive factor (OIF)]	6491	4195	5235	6542	4408	5327	6071	7520	5276	6336	0	0	0	0	0	78812	22339	61193	37632	52800
SHBG_HUMAN	Sex hormone-binding globulin (SHBG) (Sex steroid-binding protein) (SBP) (Testis-specific androgen-binding protein) (ABP) (Testosterone-estradiol-binding globulin) (TeBG) (Testosterone-estrogen-binding globulin)	6348	5388	6675	3922	3955	2317	1273	912	2467	3005	1422	999	1270	1106	1405	0	0	0	0	0
PGBM_HUMAN	Basement membrane-specific heparan sulfate proteoglycan core protein (HSPG) (Perlecan) (PLC) [Cleaved into: Endorepellin; LG3 peptide]	6300	7030	7136	6366	6281	10900	8562	8761	6890	8835	4394	5416	4575	6158	4065	0	0	0	0	0
MARE1_BOVIN	Microtubule-associated protein RP/EB family member 1 (APC-binding protein EB1) (End-binding protein 1) (EB1)	6277	6261	5788	3810	3415	4016	6009	4148	6253	4431	0	0	0	0	0	2775	4078	16971	29574	2751
GANAB_HUMAN	Neutral alpha-glucosidase AB (EC 3.2.1.207) (Alpha-glucosidase 2) (Glucosidase II subunit alpha)	6156	7886	4400	4005	5231	5177	6979	6482	5830	5165	3642	3787	1749	3349	3053	0	0	0	0	0
IBP1_BOVIN	Insulin-like growth factor-binding protein 1 (IBP-1) (IGF-binding protein 1) (IGFBP-1) (bIGFBP-1)	6154	9632	11600	7766	9445	20598	15706	26446	34562	8884	0	0	0	0	0	6266	3104	6844	11239	6271
URP2_HUMAN	Fermitin family homolog 3 (Kindlin-3) (MIG2-like protein) (Unc-112-related protein 2)	6145	6573	8563	4770	7385	4356	5811	5524	6405	6284	10968	10529	11353	4701	11942	0	0	0	0	0
FCN2_HUMAN	Ficolin-2 (37 kDa elastin-binding protein) (Collagen/fibrinogen domain-containing protein 2) (EBP-37) (Ficolin-B) (Ficolin-beta) (Hucolin) (L-ficolin) (Serum lectin p35)	6013	4008	2319	2566	5812	1571	3299	4034	5100	3146	5257	8674	7086	3901	10314	0	0	0	0	0
CATD_BOVIN	Cathepsin D (EC 3.4.23.5)	5960	10549	7818	6004	5386	14643	11864	11288	6944	10222	0	0	0	0	0	3696	1908	3752	2043	2338
S10AC_BOVIN	Protein S100-A12 (Calcium-binding protein in amniotic fluid 1) (CAAF1) (Calgranulin-C) (CAGC) (Cornea-associated antigen) (CO-AG) (Extracellular newly identified RAGE-binding protein) (EN-RAGE) (RAGE-binding protein) (S100 calcium-binding protein A12)	5842	7593	10773	7140	14017	52625	25223	52027	52885	11581	0	0	0	0	0	20860	4772	34913	29882	30811
OSTP_BOVIN	Osteopontin (Bone sialoprotein 1) (Secreted phosphoprotein 1) (SPP-1)	5824	6851	6277	4161	4572	6425	6097	6081	6659	5769	0	0	0	0	0	4939	3754	3597	5674	3470
TKT_BOVIN	Transketolase (TK) (EC 2.2.1.1)	5808	6278	6075	8360	8015	5385	5647	9460	5942	8245	0	0	0	0	0	18627	6109	15915	63829	72890
MDHC_HUMAN	Malate dehydrogenase, cytoplasmic (EC 1.1.1.37) (Aromatic alpha-keto acid reductase) (KAR) (EC 1.1.1.96) (Cytosolic malate dehydrogenase)	5789	5226	3352	5531	4404	1982	2844	2638	2107	2671	8329	8316	7370	10972	1970	0	0	0	0	0
FBLN3_HUMAN	EGF-containing fibulin-like extracellular matrix protein 1 (Extracellular protein S1-5) (Fibrillin-like protein) (Fibulin-3) (FIBL-3)	5746	5197	5430	5889	5355	5906	8748	9628	6079	9340	5622	3634	4912	4632	4494	0	0	0	0	0
PTX3_BOVIN	Pentraxin-related protein PTX3 (Pentaxin-related protein PTX3)	5721	3675	4049	1797	7289	9060	8223	10469	3386	2916	0	0	0	0	0	1201	932	4340	3509	5576
IDHC_BOVIN	Isocitrate dehydrogenase [NADP] cytoplasmic (IDH) (IDH1) (EC 1.1.1.42) (Cytosolic NADP-isocitrate dehydrogenase) (IDPc) (NADP(+)-specific ICDH) (Oxalosuccinate decarboxylase)	5663	4833	4741	5721	5470	17350	8883	15781	18577	12548	0	0	0	0	0	2787	2212	4591	19795	8610
CO7_HUMAN	Complement component C7	5651	6495	8090	5864	7903	1963	2305	3191	5368	4372	4982	8925	3673	2439	4955	0	0	0	0	0
AK1A1_BOVIN	Aldo-keto reductase family 1 member A1 (EC 1.1.1.2) (EC 1.1.1.33) (EC 1.1.1.372) (EC 1.1.1.54) (Alcohol dehydrogenase [NADP(+)]) (Aldehyde reductase) (Glucuronate reductase) (EC 1.1.1.19) (Glucuronolactone reductase) (EC 1.1.1.20)	5644	5587	3281	4790	6922	13280	6900	7675	8580	6452	0	0	0	0	0	14129	1569	20318	30688	33776
PTPRM_HUMAN	Receptor-type tyrosine-protein phosphatase mu (Protein-tyrosine phosphatase mu) (R-PTP-mu) (EC 3.1.3.48)	5574	6072	5421	3952	4930	8278	7406	7045	5566	5141	1192	673	1258	573	1071	0	0	0	0	0
CAN1_BOVIN	Calpain-1 catalytic subunit (EC 3.4.22.52) (Calcium-activated neutral proteinase 1) (CANP 1) (Calpain mu-type) (Calpain-1 large subunit) (Micromolar-calpain) (muCANP)	5541	5327	6028	3341	6565	8522	6890	6786	16120	6467	0	0	0	0	0	21766	5446	26476	34627	30018
GOLM1_HUMAN	Golgi membrane protein 1 (Golgi membrane protein GP73) (Golgi phosphoprotein 2)	5481	4709	4689	5324	2333	8335	7503	6242	6101	6968	1198	2128	1916	2459	1320	0	0	0	0	0
C4BPB_HUMAN	C4b-binding protein beta chain	5432	5571	9206	11771	5199	2543	1747	2338	7413	3481	8834	17863	12291	4584	8511	0	0	0	0	0
COCA1_HUMAN	Collagen alpha-1(XII) chain	5414	5055	4393	4329	4336	4517	6758	4461	5098	5304	3410	4248	3481	4165	3351	0	0	0	0	0
VIME_HUMAN	Vimentin	5405	4861	6147	2860	6185	5589	3923	5632	4312	5925	7488	7956	6531	10892	6427	0	0	0	0	0
PRDX2_HUMAN	Peroxiredoxin-2 (EC 1.11.1.24) (Natural killer cell-enhancing factor B) (NKEF-B) (PRP) (Thiol-specific antioxidant protein) (TSA) (Thioredoxin peroxidase 1) (Thioredoxin-dependent peroxide reductase 1) (Thioredoxin-dependent peroxiredoxin 2)	5382	6147	8100	6053	6107	3772	5547	6336	8840	4132	8106	13066	1233	4875	4893	0	0	0	0	0
PRDX1_HUMAN	Peroxiredoxin-1 (EC 1.11.1.24) (Natural killer cell-enhancing factor A) (NKEF-A) (Proliferation-associated gene protein) (PAG) (Thioredoxin peroxidase 2) (Thioredoxin-dependent peroxide reductase 2) (Thioredoxin-dependent peroxiredoxin 1)	5312	5275	10056	2985	4772	7362	3519	1266	7029	5404	6434	7607	4941	3824	2301	0	0	0	0	0
LIPC_BOVIN	Hepatic triacylglycerol lipase (HL) (Hepatic lipase) (EC 3.1.1.3) (Lipase member C) (Lysophospholipase) (EC 3.1.1.5) (Phospholipase A1) (EC 3.1.1.32)	5306	3710	2562	4728	5117	9725	6298	8191	7288	8032	0	0	0	0	0	27032	3121	18325	22405	29716
FHR5_HUMAN	Complement factor H-related protein 5 (FHR-5)	5248	9221	10600	6252	5231	3528	8421	5589	8682	13300	26216	37987	36392	30824	40240	0	0	0	0	0
PTGR1_BOVIN	Prostaglandin reductase 1 (PRG-1) (15-oxoprostaglandin 13-reductase) (EC 1.3.1.48) (Dithiolethione-inducible gene 1 protein) (D3T-inducible gene 1 protein) (DIG-1) (Leukotriene B4 12-hydroxydehydrogenase) (NAD(P)H-dependent alkenal/one oxidoreductase) (EC 1.3.1.74)	5224	2781	2677	10993	5919	4901	8222	5098	4691	7002	0	0	0	0	0	5515	1590	7947	19513	8221
CSRP1_BOVIN	Cysteine and glycine-rich protein 1 (Cysteine-rich protein 1) (CRP1)	5206	3852	4080	3150	3054	6077	4746	5706	7426	3381	0	0	0	0	0	1234	1566	1200	1571	1053
DSG1_HUMAN	Desmoglein-1 (Cadherin family member 4) (Desmosomal glycoprotein 1) (DG1) (DGI) (Pemphigus foliaceus antigen)	5192	7500	7009	3861	4948	4505	5865	5253	10153	5312	9389	13195	5975	7091	5515	0	0	0	0	0
MYOC_BOVIN	Myocilin (Myocilin 55 kDa subunit) (Trabecular meshwork-induced glucocorticoid response protein) [Cleaved into: Myocilin, N-terminal fragment (Myocilin 20 kDa N-terminal fragment); Myocilin, C-terminal fragment (Myocilin 35 kDa N-terminal fragment)]	5169	4267	3440	6110	3877	6318	7131	6243	5860	7028	0	0	0	0	0	3586	2056	5793	2630	8341
THIC_HUMAN	Acetyl-CoA acetyltransferase, cytosolic (EC 2.3.1.9) (Acetyl-CoA transferase-like protein) (Cytosolic acetoacetyl-CoA thiolase)	5097	6440	5390	5977	6007	5812	5337	7299	5425	8026	6075	3889	3715	5513	5697	0	0	0	0	0
PA2GA_HUMAN	Phospholipase A2, membrane associated (EC 3.1.1.4) (GIIC sPLA2) (Group IIA phospholipase A2) (Non-pancreatic secretory phospholipase A2) (NPS-PLA2) (Phosphatidylcholine 2-acylhydrolase 2A)	5026	4399	5063	2288	4600	5129	7306	5683	8733	8231	7855	8094	7801	8532	9034	0	0	0	0	0
IGHG3_HUMAN	Immunoglobulin heavy constant gamma 3 (HDC) (Heavy chain disease protein) (Ig gamma-3 chain C region)	4967	2090	2534	2696	7387	3524	8640	9623	43043	14629	37461	23282	1971	2857	2821	0	0	0	0	0
AL9A1_BOVIN	4-trimethylaminobutyraldehyde dehydrogenase (TMABA-DH) (TMABADH) (EC 1.2.1.47) (Aldehyde dehydrogenase family 9 member A1) (EC 1.2.1.3)	4882	5841	5370	5770	5346	8174	8000	8323	4806	7278	0	0	0	0	0	216690	193878	302517	385644	242735
CADH6_BOVIN	Cadherin-6	4882	4332	4052	3607	4243	5572	6324	6298	5202	5514	0	0	0	0	0	1183	1466	1147	1490	1658
WDR1_BOVIN	WD repeat-containing protein 1	4875	4234	5398	2607	6198	3854	6636	5400	5115	5293	0	0	0	0	0	16503	2346	16889	35622	14783
C1R_HUMAN	Complement C1r subcomponent (EC 3.4.21.41) (Complement component 1 subcomponent r) [Cleaved into: Complement C1r subcomponent heavy chain; Complement C1r subcomponent light chain]	4863	5332	8244	7372	6244	6321	6161	5324	16576	5707	11426	10771	8146	6975	6553	0	0	0	0	0
PLEK_HUMAN	Pleckstrin (Platelet 47 kDa protein) (p47)	4848	6047	9432	3415	4862	4842	9832	6218	9484	6529	5466	6014	5736	8220	5821	0	0	0	0	0
CATA_BOVIN	Catalase (EC 1.11.1.6)	4807	4706	4758	3605	3604	6414	4675	4236	4814	3090	0	0	0	0	0	3133	2188	7516	22314	7017
CD14_BOVIN	Monocyte differentiation antigen CD14 (Myeloid cell-specific leucine-rich glycoprotein) (CD antigen CD14)	4733	5065	4912	3957	3872	6194	5249	5917	5192	5540	0	0	0	0	0	11561	5733	13715	10185	14393
HEBP1_BOVIN	Heme-binding protein 1	4683	5424	6506	3880	4306	4544	5150	6423	7976	3149	0	0	0	0	0	7195	735	23239	16654	9046
COBA1_HUMAN	Collagen alpha-1(XI) chain	4655	6219	3818	4529	4696	6583	10226	8180	5213	9895	1797	3015	2162	2664	1998	0	0	0	0	0
ATS2_BOVIN	A disintegrin and metalloproteinase with thrombospondin motifs 2 (ADAM-TS 2) (ADAM-TS2) (ADAMTS-2) (EC 3.4.24.14) (Procollagen I N-proteinase) (PC I-NP) (Procollagen I/II amino propeptide-processing enzyme) (Procollagen N-endopeptidase) (pNPI)	4654	5404	4586	3444	874	3053	5060	3725	1347	1579	0	0	0	0	0	59848	44607	48055	30287	55088
ANXA1_HUMAN	Annexin A1 (Annexin I) (Annexin-1) (Calpactin II) (Calpactin-2) (Chromobindin-9) (Lipocortin I) (Phospholipase A2 inhibitory protein) (p35) [Cleaved into: Annexin Ac2-26]	4643	4670	4408	3060	3915	3117	4445	3671	3575	2704	7120	6205	5799	4637	5935	0	0	0	0	0
LBP_HUMAN	Lipopolysaccharide-binding protein (LBP)	4570	3932	3541	5638	6786	6983	6090	4414	5107	8917	6114	8759	6748	4528	6526	0	0	0	0	0
FA9_HUMAN	Coagulation factor IX (EC 3.4.21.22) (Christmas factor) (Plasma thromboplastin component) (PTC) [Cleaved into: Coagulation factor IXa light chain; Coagulation factor IXa heavy chain]	4462	3121	5992	8693	8598	5672	4326	3545	6946	3215	8228	18407	8543	6232	3446	0	0	0	0	0
GNAI2_HUMAN	Guanine nucleotide-binding protein G(i) subunit alpha-2 (Adenylate cyclase-inhibiting G alpha protein)	4439	2404	3505	3220	3737	2551	4007	3520	4161	4123	3406	5413	2631	3415	3676	0	0	0	0	0
S10A9_BOVIN	Protein S100-A9 (BEE22) (Calgranulin-B) (Neutrophil cytosolic 23 kDa protein) (p23) (S100 calcium-binding protein A9)	4425	3499	5555	4017	7776	35885	20139	43367	52144	7996	0	0	0	0	0	7109	4239	36801	31975	12964
OAF_HUMAN	Out at first protein homolog (HCV NS5A-transactivated protein 13 target protein 2)	4415	2784	2101	1694	4140	5944	4762	3982	6044	3722	1061	1983	1120	1688	1279	0	0	0	0	0
CNDP1_HUMAN	Beta-Ala-His dipeptidase (EC 3.4.13.20) (CNDP dipeptidase 1) (Carnosine dipeptidase 1) (Glutamate carboxypeptidase-like protein 2) (Serum carnosinase)	4364	4568	6296	5060	6406	3498	4127	3503	6702	3721	3050	12486	3696	3278	3411	0	0	0	0	0
MAMC2_HUMAN	MAM domain-containing protein 2 (MAM domain-containing proteoglycan) (Mamcan)	4355	4999	4791	4817	5580	4992	3391	4541	4920	4459	3500	4014	3371	3489	3549	0	0	0	0	0
MOES_BOVIN	Moesin (Membrane-organizing extension spike protein)	4351	5051	4349	3506	3967	4889	5163	5363	3385	4774	0	0	0	0	0	19086	6830	14055	39787	24596
RS14_HUMAN	40S ribosomal protein S14 (Small ribosomal subunit protein uS11)	4347	4061	4465	2309	3273	2656	8243	3424	3564	2116	7637	2530	1016	7505	1822	0	0	0	0	0
ALDOC_HUMAN	Fructose-bisphosphate aldolase C (EC 4.1.2.13) (Brain-type aldolase)	4333	4750	4232	3440	4955	13132	12517	6906	11204	5396	3080	2124	3233	2436	2797	0	0	0	0	0
IBP6_HUMAN	Insulin-like growth factor-binding protein 6 (IBP-6) (IGF-binding protein 6) (IGFBP-6)	4325	4360	4781	4319	4903	14782	44906	52114	83127	38992	5686	4808	5450	5025	6218	0	0	0	0	0
ITIH3_HUMAN	Inter-alpha-trypsin inhibitor heavy chain H3 (ITI heavy chain H3) (ITI-HC3) (Inter-alpha-inhibitor heavy chain 3) (Serum-derived hyaluronan-associated protein) (SHAP)	4315	3690	6398	4898	7732	1624	1624	2671	6490	1397	8271	18055	12100	6518	1879	0	0	0	0	0
COEA1_HUMAN	Collagen alpha-1(XIV) chain (Undulin)	4300	4338	4468	2353	3792	2888	4313	3191	4373	2539	2322	3373	2361	3671	2231	0	0	0	0	0
EZRI_BOVIN	Ezrin (Cytovillin) (Villin-2) (p81)	4248	5016	5465	3513	4074	4675	3025	3998	4192	3044	0	0	0	0	0	23140	4483	18718	34871	41468
EMAL2_HUMAN	Echinoderm microtubule-associated protein-like 2 (EMAP-2) (HuEMAP-2)	4243	3702	6380	5161	5733	4575	5760	7819	7823	4469	946	1336	964	1587	889	0	0	0	0	0
NHRF1_BOVIN	Na(+)/H(+) exchange regulatory cofactor NHE-RF1 (NHERF-1) (Ezrin-radixin-moesin-binding phosphoprotein 50) (EBP50) (Regulatory cofactor of Na(+)/H(+) exchanger) (Sodium-hydrogen exchanger regulatory factor 1) (Solute carrier family 9 isoform A3 regulatory factor 1)	4135	4707	4261	3989	3513	3060	4289	4119	3741	3750	0	0	0	0	0	110317	73686	74291	73330	110371
CALD1_BOVIN	Non-muscle caldesmon (CDM) (L-caldesmon)	4111	6230	6186	5804	5478	1281	3209	3889	4057	1910	0	0	0	0	0	8739	1066	8023	5285	7430
LTBP4_HUMAN	Latent-transforming growth factor beta-binding protein 4 (LTBP-4)	4093	4128	3990	3030	3241	3346	4262	3591	3833	3292	2912	3695	2810	4359	3137	0	0	0	0	0
COFA1_HUMAN	Collagen alpha-1(XV) chain [Cleaved into: Restin (Endostatin-XV) (Related to endostatin) (Restin-I); Restin-2 (Restin-II); Restin-3 (Restin-III); Restin-4 (Restin-IV)]	4070	1561	3954	3309	4701	10736	5290	5501	7421	5545	2939	1573	2786	1848	2666	0	0	0	0	0
PCYOX_HUMAN	Prenylcysteine oxidase 1 (EC 1.8.3.5) (Prenylcysteine lyase)	4008	3026	2881	2706	2266	4775	3059	4032	2701	2362	2129	3563	3037	2076	3290	0	0	0	0	0
PRDX6_HUMAN	Peroxiredoxin-6 (EC 1.11.1.27) (1-Cys peroxiredoxin) (1-Cys PRX) (24 kDa protein) (Acidic calcium-independent phospholipase A2) (aiPLA2) (EC 3.1.1.4) (Antioxidant protein 2) (Glutathione-dependent peroxiredoxin) (Liver 2D page spot 40) (Lysophosphatidylcholine acyltransferase 5) (LPC acyltransferase 5) (LPCAT-5) (Lyso-PC acyltransferase 5) (EC 2.3.1.23) (Non-selenium glutathione peroxidase) (NSGP…	3980	3620	3883	2151	2530	2895	3988	2665	4124	2905	2792	3683	2827	3853	2668	0	0	0	0	0
PLVAP_HUMAN	Plasmalemma vesicle-associated protein (Fenestrated endothelial-linked structure protein) (Plasmalemma vesicle protein 1) (PV-1)	3972	5223	4935	3381	3123	2776	5041	2857	3280	4779	2645	1919	2559	1810	2706	0	0	0	0	0
ATOX1_BOVIN	Copper transport protein ATOX1 (Metal transport protein ATX1)	3949	2285	2204	2516	3173	2905	3274	2546	1672	2839	0	0	0	0	0	31556	8374	31509	17378	32744
PI42A_HUMAN	Phosphatidylinositol 5-phosphate 4-kinase type-2 alpha (EC 2.7.1.149) (1-phosphatidylinositol 5-phosphate 4-kinase 2-alpha) (Diphosphoinositide kinase 2-alpha) (PIP5KIII) (Phosphatidylinositol 5-Phosphate 4-Kinase) (PI5P4Kalpha) (Phosphatidylinositol 5-phosphate 4-kinase type II alpha) (PI(5)P 4-kinase type II alpha) (PIP4KII-alpha) (PtdIns(4)P-5-kinase B isoform) (PtdIns(4)P-5-kinase C isoform) …	3921	2800	4336	893	1199	9284	6670	6425	9418	4030	1001	1238	925	1223	903	0	0	0	0	0
LEG1_BOVIN	Galectin-1 (Gal-1) (14 kDa lectin) (Beta-galactoside-binding lectin L-14-I) (Galaptin) (Lactose-binding lectin 1) (Lectin galactoside-binding soluble 1) (S-Lac lectin 1)	3897	4181	3519	2184	2484	2283	3752	2223	3807	2498	0	0	0	0	0	7186	7546	66450	36585	7653
C1S_BOVIN	Complement C1s subcomponent (EC 3.4.21.42) (C1 esterase) (Complement component 1 subcomponent s) [Cleaved into: Complement C1s subcomponent heavy chain; Complement C1s subcomponent light chain]	3791	4534	4285	4794	5180	6096	4232	5373	3855	5572	0	0	0	0	0	32691	10930	165592	129938	38210
PGM2_HUMAN	Phosphopentomutase (EC 5.4.2.7) (Glucose phosphomutase 2) (Phosphodeoxyribomutase) (Phosphoglucomutase-2) (EC 5.4.2.2)	3769	3345	1819	2806	3059	3328	5046	6020	11140	4230	1262	875	1143	891	645	0	0	0	0	0
MMRN1_HUMAN	Multimerin-1 (EMILIN-4) (Elastin microfibril interface located protein 4) (Elastin microfibril interfacer 4) (Endothelial cell multimerin) [Cleaved into: Platelet glycoprotein Ia*; 155 kDa platelet multimerin (p-155) (p155)]	3755	5450	4240	4146	6244	2591	2981	2945	2807	3514	3459	12929	10596	13502	13838	0	0	0	0	0
GALK1_BOVIN	Galactokinase (EC 2.7.1.6) (Galactose kinase)	3702	5723	4872	4310	4204	5425	5010	5232	3929	4528	0	0	0	0	0	144292	68485	149578	128114	217548
HYES_HUMAN	Bifunctional epoxide hydrolase 2 [Includes: Cytosolic epoxide hydrolase 2 (CEH) (EC 3.3.2.10) (Epoxide hydratase) (Soluble epoxide hydrolase) (SEH); Lipid-phosphate phosphatase (EC 3.1.3.76)]	3695	1640	1599	1468	1285	1330	945	1303	1021	519	998	1076	615	975	867	0	0	0	0	0
QPCT_BOVIN	Glutaminyl-peptide cyclotransferase (EC 2.3.2.5) (Glutaminyl cyclase) (QC) (Glutaminyl-tRNA cyclotransferase)	3683	3079	3283	2462	2151	2819	3606	2535	3544	2496	0	0	0	0	0	21633	12784	25889	33199	34796
SMOC1_HUMAN	SPARC-related modular calcium-binding protein 1 (Secreted modular calcium-binding protein 1) (SMOC-1)	3668	4705	4947	5970	4469	5841	6489	6942	6379	5368	618	1094	717	476	611	0	0	0	0	0
CAN2_BOVIN	Calpain-2 catalytic subunit (EC 3.4.22.53) (Calcium-activated neutral proteinase 2) (CANP 2) (Calpain M-type) (Calpain-2 large subunit) (Millimolar-calpain) (M-calpain)	3634	4735	5201	4069	4854	4126	3270	4087	3264	2891	0	0	0	0	0	10359	4595	39159	38119	30583
PRIO_HUMAN	Major prion protein (PrP) (ASCR) (PrP27-30) (PrP33-35C) (CD antigen CD230)	3517	2210	8745	5357	6150	4716	6594	5885	12358	12019	3719	6264	7788	6678	7582	0	0	0	0	0
NID1_HUMAN	Nidogen-1 (NID-1) (Entactin)	3512	4213	4191	3539	3543	3683	3055	3535	3495	3503	2857	2656	2883	2141	2587	0	0	0	0	0
FILA_HUMAN	Filaggrin	3510	4276	7572	3000	3557	1582	6884	4751	9084	3416	12105	14727	11683	7967	9506	0	0	0	0	0
VCAM1_HUMAN	Vascular cell adhesion protein 1 (V-CAM 1) (VCAM-1) (INCAM-100) (CD antigen CD106) [Cleaved into: Soluble Vascular Cell Adhesion Molecule-1]	3495	2479	2372	5830	4245	12675	5318	2761	3032	5142	734	1300	696	1527	817	0	0	0	0	0
ANXA5_HUMAN	Annexin A5 (Anchorin CII) (Annexin V) (Annexin-5) (Calphobindin I) (CPB-I) (Endonexin II) (Lipocortin V) (Placental anticoagulant protein 4) (PP4) (Placental anticoagulant protein I) (PAP-I) (Thromboplastin inhibitor) (Vascular anticoagulant-alpha) (VAC-alpha)	3449	3984	3716	2418	3146	3095	3022	3037	3758	3126	4077	5247	4121	5107	3872	0	0	0	0	0
BPIB1_BOVIN	BPI fold-containing family B member 1 (Long palate, lung and nasal epithelium carcinoma-associated protein 1) (von Ebner minor salivary gland protein) (VEMSGP)	3435	1933	3524	3073	2943	11424	15565	18387	19644	16569	0	0	0	0	0	1736	1466	1910	4178	3860
RCN3_BOVIN	Reticulocalbin-3	3428	2925	4241	3393	2065	3772	3727	3441	3421	3220	0	0	0	0	0	23799	3757	41540	37965	44876
CASPE_HUMAN	Caspase-14 (CASP-14) (EC 3.4.22.-) [Cleaved into: Caspase-14 subunit p17, mature form; Caspase-14 subunit p10, mature form; Caspase-14 subunit p20, intermediate form; Caspase-14 subunit p8, intermediate form]	3409	7702	6685	3364	1770	1579	3233	1487	3691	1654	8318	11466	6527	9955	8452	0	0	0	0	0
6PGD_HUMAN	6-phosphogluconate dehydrogenase, decarboxylating (EC 1.1.1.44)	3289	4102	4320	4674	2972	3010	4620	3521	4250	3918	2408	3547	2946	3847	2267	0	0	0	0	0
TGM3_HUMAN	Protein-glutamine gamma-glutamyltransferase E (EC 2.3.2.13) (Transglutaminase E) (TG(E)) (TGE) (TGase E) (Transglutaminase-3) (TGase-3) [Cleaved into: Protein-glutamine gamma-glutamyltransferase E 50 kDa catalytic chain; Protein-glutamine gamma-glutamyltransferase E 27 kDa non-catalytic chain]	3283	4941	4508	2657	3505	2833	4170	4609	6777	2203	5472	9131	5055	2878	3518	0	0	0	0	0
LRP1_HUMAN	Prolow-density lipoprotein receptor-related protein 1 (LRP-1) (Alpha-2-macroglobulin receptor) (A2MR) (Apolipoprotein E receptor) (APOER) (CD antigen CD91) [Cleaved into: Low-density lipoprotein receptor-related protein 1 85 kDa subunit (LRP-85); Low-density lipoprotein receptor-related protein 1 515 kDa subunit (LRP-515); Low-density lipoprotein receptor-related protein 1 intracellular domain (L…	3267	2810	3446	5450	5212	6985	3880	5306	4248	5428	3918	2597	3901	2631	3943	0	0	0	0	0
CYTC_BOVIN	Cystatin-C (Colostrum thiol proteinase inhibitor) (Cystatin-3)	3261	3086	6897	4199	4874	3517	9150	6951	7821	3236	0	0	0	0	0	1636	2005	1683	2030	2258
PROF1_BOVIN	Profilin-1 (Profilin I)	3241	3231	3703	6036	5269	5642	3464	5267	3392	5393	0	0	0	0	0	71925	3888	80607	83958	95961
DPYL2_BOVIN	Dihydropyrimidinase-related protein 2 (DRP-2) (Neural-specific protein NSP60)	3225	2272	3397	2908	3044	2407	3042	3169	2928	2989	0	0	0	0	0	5168	1876	3195	5062	6681
NUCL_HUMAN	Nucleolin (Protein C23)	3211	2757	3426	3947	3620	4925	4459	3834	3659	3062	3060	3236	2347	2421	2854	0	0	0	0	0
CAH3_BOVIN	Carbonic anhydrase 3 (EC 4.2.1.1) (Carbonate dehydratase III) (Carbonic anhydrase III) (CA-III)	3162	3119	3076	3434	3102	9600	7907	11390	12881	2194	0	0	0	0	0	833	1527	804	1482	859
HP251_BOVIN	Protein HP-25 homolog 1	3132	1414	6105	6398	5266	32988	16303	19690	14969	16559	0	0	0	0	0	2331	1229	4543	1429	2044
CBG_HUMAN	Corticosteroid-binding globulin (CBG) (Serpin A6) (Transcortin)	3118	3382	6242	7293	6081	2044	1957	3455	6060	3151	6317	13302	5315	2269	2851	0	0	0	0	0
HPPD_BOVIN	4-hydroxyphenylpyruvate dioxygenase (EC 1.13.11.27) (4-hydroxyphenylpyruvic acid oxidase) (4HPPD) (HPD) (HPPDase)	3116	2713	2443	2202	2367	5010	4280	3218	1867	3890	0	0	0	0	0	1036	1723	1093	1910	1866
K1C19_HUMAN	Keratin, type I cytoskeletal 19 (Cytokeratin-19) (CK-19) (Keratin-19) (K19)	3110	3526	2879	2032	2514	1841	2296	1180	3365	2863	1254	2440	3404	4894	898	0	0	0	0	0
VASP_BOVIN	Vasodilator-stimulated phosphoprotein (VASP)	3098	2518	2910	3581	4541	3674	2383	3383	3091	3670	0	0	0	0	0	20626	3595	16358	19744	27069
MIF_BOVIN	Macrophage migration inhibitory factor (MIF) (EC 5.3.2.1) (L-dopachrome isomerase) (L-dopachrome tautomerase) (EC 5.3.3.12) (Phenylpyruvate tautomerase) (p12A)	3066	3511	3129	6886	5192	11573	8185	9626	6761	6698	0	0	0	0	0	2878	31535	97737	64233	2188
GP1BB_HUMAN	Platelet glycoprotein Ib beta chain (GP-Ib beta) (GPIb-beta) (GPIbB) (Antigen CD42b-beta) (CD antigen CD42c)	3006	1778	2291	4479	3308	5110	6313	4550	8180	3506	896	3681	1129	1368	2065	0	0	0	0	0
GDIR1_BOVIN	Rho GDP-dissociation inhibitor 1 (Rho GDI 1) (Rho-GDI alpha)	2998	3019	2351	6026	5492	7698	7605	5167	2644	3027	0	0	0	0	0	5042	2821	8828	6316	3747
VIME_BOVIN	Vimentin	2976	1617	3445	2111	2936	1927	2108	3762	1834	1453	0	0	0	0	0	2433	1476	8633	4212	1432
K2C78_HUMAN	Keratin, type II cytoskeletal 78 (Cytokeratin-78) (CK-78) (Keratin-5b) (Keratin-78) (K78) (Type-II keratin Kb40)	2974	3163	4175	1441	1054	1392	2485	2433	6035	1695	5979	8070	5241	5118	4346	0	0	0	0	0
RNAS1_HUMAN	Ribonuclease pancreatic (EC 4.6.1.18) (HP-RNase) (RIB-1) (RNase UpI-1) (Ribonuclease 1) (RNase 1) (Ribonuclease A) (RNase A)	2969	3647	3519	3548	2356	2116	2916	2899	2733	4237	4888	5303	3843	2879	7846	0	0	0	0	0
PTK7_HUMAN	Inactive tyrosine-protein kinase 7 (Colon carcinoma kinase 4) (CCK-4) (Protein-tyrosine kinase 7) (Pseudo tyrosine kinase receptor 7) (Tyrosine-protein kinase-like 7)	2966	4827	7234	8230	6779	9556	12131	7200	4776	7799	1265	1370	1258	1374	2501	0	0	0	0	0
PUR6_HUMAN	Bifunctional phosphoribosylaminoimidazole carboxylase/phosphoribosylaminoimidazole succinocarboxamide synthetase (PAICS) [Includes: Phosphoribosylaminoimidazole carboxylase (EC 4.1.1.21) (AIR carboxylase) (AIRC); Phosphoribosylaminoimidazole succinocarboxamide synthetase (EC 6.3.2.6) (SAICAR synthetase)]	2919	3977	3135	2894	4256	3435	3030	3284	3442	3062	2389	4882	3182	3263	2223	0	0	0	0	0
FSCN1_HUMAN	Fascin (55 kDa actin-bundling protein) (Singed-like protein) (p55)	2903	1973	2022	1646	3184	2639	3274	3865	1641	2811	2064	1129	2040	1167	2110	0	0	0	0	0
OIT3_BOVIN	Oncoprotein-induced transcript 3 protein	2897	2627	2968	2598	2953	2621	2941	2229	2838	2121	0	0	0	0	0	4002	3362	28295	19601	3292
RAB1A_HUMAN	Ras-related protein Rab-1A (EC 3.6.5.2) (YPT1-related protein)	2872	2233	2237	1667	2210	2444	2797	2978	2810	2215	1225	1481	1141	1360	1103	0	0	0	0	0
C1TC_HUMAN	C-1-tetrahydrofolate synthase, cytoplasmic (C1-THF synthase) (Epididymis secretory sperm binding protein) [Cleaved into: C-1-tetrahydrofolate synthase, cytoplasmic, N-terminally processed] [Includes: Methylenetetrahydrofolate dehydrogenase (EC 1.5.1.5); Methenyltetrahydrofolate cyclohydrolase (EC 3.5.4.9); Formyltetrahydrofolate synthetase (EC 6.3.4.3)]	2830	2239	2328	1934	2354	2255	2920	1987	2784	1843	1993	2693	1858	1825	2517	0	0	0	0	0
PGRP2_HUMAN	N-acetylmuramoyl-L-alanine amidase (EC 3.5.1.28) (Peptidoglycan recognition protein 2) (Peptidoglycan recognition protein long) (PGRP-L)	2790	3756	19913	15488	1343	2188	937	938	1850	990	6223	10279	939	1416	3565	0	0	0	0	0
FA10_HUMAN	Coagulation factor X (EC 3.4.21.6) (Stuart factor) (Stuart-Prower factor) [Cleaved into: Factor X light chain; Factor X heavy chain; Activated factor Xa heavy chain]	2779	3240	5113	3227	4276	3162	4424	4645	4595	3198	5550	7509	3356	6460	7053	0	0	0	0	0
FA7_BOVIN	Coagulation factor VII (EC 3.4.21.21) (Serum prothrombin conversion accelerator) [Cleaved into: Factor VII light chain; Factor VII heavy chain]	2764	2285	3328	3295	2783	4251	4702	4336	3183	4089	0	0	0	0	0	2275	1102	1764	3968	3925
ATL2_HUMAN	ADAMTS-like protein 2 (ADAMTSL-2)	2761	1557	2232	1700	1567	1587	1967	1528	1882	1487	1511	1437	1478	1775	1329	0	0	0	0	0
CMGA_BOVIN	Chromogranin-A (CgA) (Pituitary secretory protein I) (SP-I) [Cleaved into: Vasostatin-1; Chromofungin; Chromostatin; Chromacin; Pancreastatin; WE-14; Catestatin; GE-25; Serpinin-RRG; Serpinin; p-Glu serpinin precursor]	2755	3093	2940	3036	3133	3793	2783	3846	2434	3746	0	0	0	0	0	24627	7187	33623	27286	26076
COR1A_BOVIN	Coronin-1A (Coronin-like protein A) (Clipin-A) (Coronin-like protein p57) (Tryptophan aspartate-containing coat protein) (TACO)	2748	3012	2383	2457	2740	2247	3809	2659	2523	2972	0	0	0	0	0	12503	7679	31476	46530	10485
SPB12_HUMAN	Serpin B12	2710	3387	4241	1570	2905	3346	4841	2581	9713	2430	2896	2860	6349	1560	1922	0	0	0	0	0
ASM_BOVIN	Sphingomyelin phosphodiesterase (EC 3.1.4.12) (EC 3.1.4.3) (Acid sphingomyelinase) (aSMase) [Cleaved into: Sphingomyelin phosphodiesterase, processed form]	2704	2042	2061	3008	2785	4660	3255	4515	3042	4556	0	0	0	0	0	1822	1330	16362	13378	1858
PEPD_HUMAN	Xaa-Pro dipeptidase (X-Pro dipeptidase) (EC 3.4.13.9) (Imidodipeptidase) (Peptidase D) (Proline dipeptidase) (Prolidase)	2688	2146	881	1554	3518	5278	3414	1166	1722	1827	1201	2191	1208	1174	1069	0	0	0	0	0
CUL4B_HUMAN	Cullin-4B (CUL-4B)	2667	1790	1661	941	1659	1341	2384	1316	2334	1290	1343	1442	1235	1261	1213	0	0	0	0	0
SPTN1_HUMAN	Spectrin alpha chain, non-erythrocytic 1 (Alpha-II spectrin) (Fodrin alpha chain) (Spectrin, non-erythroid alpha subunit)	2666	1949	2209	2619	2674	1893	2385	2044	1707	2188	2431	1939	2376	1650	1895	0	0	0	0	0
PUR8_BOVIN	Adenylosuccinate lyase (ADSL) (ASL) (EC 4.3.2.2) (Adenylosuccinase) (ASase)	2649	2164	2867	2016	2067	2797	2931	3814	3097	2893	0	0	0	0	0	18842	4082	13464	30909	35739
SERA_BOVIN	D-3-phosphoglycerate dehydrogenase (3-PGDH) (EC 1.1.1.95) (2-oxoglutarate reductase) (EC 1.1.1.399) (Malate dehydrogenase) (EC 1.1.1.37)	2631	2292	1900	1570	1651	1744	2578	1707	2509	1590	0	0	0	0	0	7249	3605	25093	22829	9124
COL10_HUMAN	Collectin-10 (Collectin liver protein 1) (CL-L1) (Collectin-34) (CL-34)	2583	2612	1793	4682	6604	3329	3234	10665	5856	4954	1047	1037	990	990	885	0	0	0	0	0
CATA_HUMAN	Catalase (EC 1.11.1.6)	2580	3110	3344	1579	2081	1379	2234	2589	5361	1951	5729	6978	4914	4903	2641	0	0	0	0	0
SORCN_HUMAN	Sorcin (22 kDa protein) (CP-22) (CP22) (V19)	2576	3046	2496	1938	2461	2398	2473	3888	3430	3550	1855	2206	1918	2009	2078	0	0	0	0	0
CO9A1_HUMAN	Collagen alpha-1(IX) chain	2545	1664	2520	2376	1599	3022	4406	2185	1585	2678	986	923	920	847	1251	0	0	0	0	0
ANG2_BOVIN	Angiogenin-2 (EC 3.1.27.-)	2514	2985	2146	1397	1441	3137	4406	3145	4100	3601	0	0	0	0	0	818	783	782	1411	945
GNPTG_BOVIN	N-acetylglucosamine-1-phosphotransferase subunit gamma (GlcNAc-1-phosphotransferase subunit gamma) (UDP-N-acetylglucosamine-1-phosphotransferase subunit gamma)	2507	1682	1629	2725	2856	3316	1683	1771	1310	1095	0	0	0	0	0	4133	700	7475	1841	8557
TGBR3_HUMAN	Transforming growth factor beta receptor type 3 (TGF-beta receptor type 3) (TGFR-3) (Betaglycan) (Transforming growth factor beta receptor III) (TGF-beta receptor type III)	2492	2060	2167	2479	1752	2877	1584	2174	2239	1908	708	1295	717	1198	664	0	0	0	0	0
HV372_HUMAN	Immunoglobulin heavy variable 3-72	2488	1949	4509	3908	2729	708	1889	1484	6056	2068	5144	6636	553	677	612	0	0	0	0	0
PRDX5_HUMAN	Peroxiredoxin-5, mitochondrial (EC 1.11.1.24) (Alu corepressor 1) (Antioxidant enzyme B166) (AOEB166) (Liver tissue 2D-page spot 71B) (PLP) (Peroxiredoxin V) (Prx-V) (Peroxisomal antioxidant enzyme) (TPx type VI) (Thioredoxin peroxidase PMP20) (Thioredoxin-dependent peroxiredoxin 5)	2461	2037	2108	881	1566	982	1591	1360	1485	1273	1142	1193	1067	1073	1016	0	0	0	0	0
PAK2_HUMAN	Serine/threonine-protein kinase PAK 2 (EC 2.7.11.1) (Gamma-PAK) (PAK65) (S6/H4 kinase) (p21-activated kinase 2) (PAK-2) (p58) [Cleaved into: PAK-2p27 (p27); PAK-2p34 (p34) (C-t-PAK2)]	2456	1850	1665	1194	1033	1006	1493	932	1749	971	940	1273	705	1201	918	0	0	0	0	0
CALR_HUMAN	Calreticulin (CRP55) (Calregulin) (Endoplasmic reticulum resident protein 60) (ERp60) (HACBP) (grp60)	2441	2176	1470	1051	1917	1209	2167	1193	1296	1127	1430	1438	812	1224	1074	0	0	0	0	0
ULA1_HUMAN	NEDD8-activating enzyme E1 regulatory subunit (Amyloid beta precursor protein-binding protein 1, 59 kDa) (APP-BP1) (Amyloid protein-binding protein 1) (Proto-oncogene protein 1)	2412	1358	1374	1282	1380	1117	1245	1110	1238	1103	1183	1116	1056	1235	1168	0	0	0	0	0
ARLY_BOVIN	Argininosuccinate lyase (ASAL) (EC 4.3.2.1) (Arginosuccinase)	2389	2263	3041	3373	3184	2846	2196	2972	2385	3101	0	0	0	0	0	36500	10058	26099	37560	49881
CLIC1_BOVIN	Chloride intracellular channel protein 1	2381	1181	1529	1491	1972	1301	729	1312	736	1326	0	0	0	0	0	458072	436972	364836	323176	516615
AHNK_HUMAN	Neuroblast differentiation-associated protein AHNAK (Desmoyokin)	2377	2019	1492	2417	2617	2228	2022	2544	2284	1598	1842	1382	1718	1436	1746	0	0	0	0	0
CTHL4_BOVIN	Cathelicidin-4 (Indolicidin)	2348	2468	4802	4006	6018	4972	2979	3521	2998	2622	0	0	0	0	0	21899	3605	65835	45122	26162
IMB1_HUMAN	Importin subunit beta-1 (Importin-90) (Karyopherin subunit beta-1) (Nuclear factor p97) (Pore targeting complex 97 kDa subunit) (PTAC97)	2338	2672	1261	2173	2397	2882	1948	1966	1707	2120	1326	725	1312	719	1301	0	0	0	0	0
F16P1_BOVIN	Fructose-1,6-bisphosphatase 1 (FBPase 1) (EC 3.1.3.11) (D-fructose-1,6-bisphosphate 1-phosphohydrolase 1) (Liver FBPase)	2298	2389	2422	3478	3522	3163	2351	3447	2356	3277	0	0	0	0	0	11929	2840	32322	48198	32363
GOLM2_BOVIN	Protein GOLM2 (Cancer susceptibility candidate gene 4 protein homolog) (CASC4) (Golgi membrane protein 2)	2293	2043	2870	1831	2003	1747	2813	1989	2147	1767	0	0	0	0	0	9738	2798	10157	8522	8602
GSTA1_BOVIN	Glutathione S-transferase A1 (EC 2.5.1.18) (13-hydroperoxyoctadecadienoate peroxidase) (EC 1.11.1.-) (Androst-5-ene-3,17-dione isomerase) (EC 5.3.3.-) (GST class-alpha member 1) (Glutathione S-transferase alpha-1) [Cleaved into: Glutathione S-transferase A1, N-terminally processed]	2290	3856	2436	5257	3965	6401	6860	7595	6687	3172	0	0	0	0	0	42602	995	27744	242207	57191
PARVA_HUMAN	Alpha-parvin (Actopaxin) (CH-ILKBP) (Calponin-like integrin-linked kinase-binding protein) (Matrix-remodeling-associated protein 2)	2288	64973	1361	1300	1238	960	1611	910	1527	863	1251	1044	1117	1155	1236	0	0	0	0	0
HAP28_HUMAN	28 kDa heat- and acid-stable phosphoprotein (PDGF-associated protein) (PAP) (PDGFA-associated protein 1) (PAP1)	2283	4273	6076	4656	5559	1429	2171	1455	2136	1464	1198	1325	1136	1064	1334	0	0	0	0	0
TBCA_BOVIN	Tubulin-specific chaperone A (TCP1-chaperonin cofactor A) (Tubulin-folding cofactor A) (CFA)	2280	1681	1798	901	1027	1224	2141	1188	2064	1152	0	0	0	0	0	1127	1465	2312	2541	2770
SAMP_BOVIN	Serum amyloid P-component (SAP)	2278	1408	2455	2194	2530	3783	3429	3321	2743	1762	0	0	0	0	0	1744	957	1504	1858	1952
CO2_BOVIN	Complement C2 (EC 3.4.21.43) (C3/C5 convertase) [Cleaved into: Complement C2b fragment; Complement C2a fragment]	2270	2361	2172	2941	2499	2686	2750	2326	2477	2653	0	0	0	0	0	14965	3699	9520	24591	22796
MTND_BOVIN	Acireductone dioxygenase (Acireductone dioxygenase (Fe(2+)-requiring)) (ARD') (Fe-ARD) (EC 1.13.11.54) (Acireductone dioxygenase (Ni(2+)-requiring)) (ARD) (Ni-ARD) (EC 1.13.11.53) (Membrane-type 1 matrix metalloproteinase cytoplasmic tail-binding protein 1) (MTCBP-1)	2255	1578	2071	1697	1128	1590	1584	1420	1414	1267	0	0	0	0	0	2941	1063	3918	1478	3324
FHR2_HUMAN	Complement factor H-related protein 2 (FHR-2) (DDESK59) (H factor-like 3) (H factor-like protein 2)	2252	2964	1338	1182	1697	1083	2395	988	2438	3257	14768	8236	1058	9667	9763	0	0	0	0	0
S10AB_HUMAN	Protein S100-A11 (Calgizzarin) (Metastatic lymph node gene 70 protein) (MLN 70) (Protein S100-C) (S100 calcium-binding protein A11) [Cleaved into: Protein S100-A11, N-terminally processed]	2248	1744	1819	1105	971	1298	2179	1231	2065	1166	1022	1848	1011	1735	967	0	0	0	0	0
BIEA_HUMAN	Biliverdin reductase A (BVR A) (EC 1.3.1.24) (Biliverdin-IX alpha-reductase)	2212	1852	1644	764	736	1105	1854	1047	1757	992	962	1776	990	1545	864	0	0	0	0	0
TSP2_BOVIN	Thrombospondin-2 (Corticotropin-induced secreted protein) (CISP)	2211	1512	1208	957	772	1124	2080	1133	2079	1139	0	0	0	0	0	3447	1802	4423	6382	7038
UBP5_HUMAN	Ubiquitin carboxyl-terminal hydrolase 5 (EC 3.4.19.12) (Deubiquitinating enzyme 5) (Isopeptidase T) (Ubiquitin thioesterase 5) (Ubiquitin-specific-processing protease 5)	2201	1306	1592	918	802	1340	1286	1187	1436	1085	961	1236	889	1183	892	0	0	0	0	0
DHSO_BOVIN	Sorbitol dehydrogenase (SDH) (EC 1.1.1.-) (L-iditol 2-dehydrogenase) (EC 1.1.1.14) (Polyol dehydrogenase) (Xylitol dehydrogenase) (XDH) (EC 1.1.1.9)	2177	2304	2983	2740	2797	2266	2554	3160	2893	3068	0	0	0	0	0	13018	4067	21928	31438	22822
HUTU_HUMAN	Urocanate hydratase (Urocanase) (EC 4.2.1.49) (Imidazolonepropionate hydrolase)	2149	1713	1459	944	891	1301	1071	1103	1582	1107	877	1637	925	1394	853	0	0	0	0	0
ASSY_BOVIN	Argininosuccinate synthase (EC 6.3.4.5) (Citrulline--aspartate ligase)	2143	1661	2085	2553	2502	2863	2170	2432	1830	2721	0	0	0	0	0	5116	1578	29330	63406	29666
SNX5_BOVIN	Sorting nexin-5	2143	1387	1689	718	915	1247	2092	1182	1983	1120	0	0	0	0	0	10989	1348	20021	20331	18261
LAMC1_HUMAN	Laminin subunit gamma-1 (Laminin B2 chain) (Laminin-1 subunit gamma) (Laminin-10 subunit gamma) (Laminin-11 subunit gamma) (Laminin-2 subunit gamma) (Laminin-3 subunit gamma) (Laminin-4 subunit gamma) (Laminin-6 subunit gamma) (Laminin-7 subunit gamma) (Laminin-8 subunit gamma) (Laminin-9 subunit gamma) (S-laminin subunit gamma) (S-LAM gamma)	2126	2077	2359	2006	1043	1518	1607	1355	1229	1189	895	1635	1288	1480	816	0	0	0	0	0
KAP2_BOVIN	cAMP-dependent protein kinase type II-alpha regulatory subunit	2109	1925	1428	1103	1073	1770	1554	1759	1544	827	0	0	0	0	0	2171	1338	1596	1334	1794
PHP14_BOVIN	14 kDa phosphohistidine phosphatase (EC 3.9.1.3) (Phosphohistidine phosphatase 1) (PHPT1) (Protein histidine phosphatase) (PHP)	2108	3787	2918	2248	1288	1650	2549	836	2740	788	0	0	0	0	0	1970	3292	49573	14393	1356
PYGL_BOVIN	Glycogen phosphorylase, liver form (EC 2.4.1.1)	2100	1995	2186	1521	1356	2366	1825	1474	1958	1227	0	0	0	0	0	9276	2434	7884	16982	8580
MGAT1_HUMAN	Alpha-1,3-mannosyl-glycoprotein 2-beta-N-acetylglucosaminyltransferase (EC 2.4.1.101) (N-glycosyl-oligosaccharide-glycoprotein N-acetylglucosaminyltransferase I) (GNT-I) (GlcNAc-T I)	2092	1344	992	1368	2295	1274	670	1330	1495	1322	1850	1045	1183	855	1597	0	0	0	0	0
PFKAL_BOVIN	ATP-dependent 6-phosphofructokinase, liver type (ATP-PFK) (PFK-L) (EC 2.7.1.11) (6-phosphofructokinase type B) (Phosphofructo-1-kinase isozyme B) (PFK-B) (Phosphohexokinase)	2063	1850	1386	1281	1399	1585	2116	1429	2069	1526	0	0	0	0	0	6699	1911	3767	7811	8093
SYTC_BOVIN	Threonine--tRNA ligase 1, cytoplasmic (EC 6.1.1.3) (Threonine--tRNA ligase, cytoplasmic) (Threonyl-tRNA synthetase) (ThrRS) (Threonyl-tRNA synthetase 1)	2047	1938	1332	1077	954	1199	2028	990	1930	1088	0	0	0	0	0	1184	1891	1090	5186	8431
GSH0_BOVIN	Glutamate--cysteine ligase regulatory subunit (GCS light chain) (Gamma-ECS regulatory subunit) (Gamma-glutamylcysteine synthetase regulatory subunit) (Glutamate--cysteine ligase modifier subunit)	2046	1563	1578	1101	863	1099	1980	1086	1951	1077	0	0	0	0	0	1269	1339	5924	16626	9255
GSTT1_BOVIN	Glutathione S-transferase theta-1 (EC 2.5.1.18) (GST class-theta-1)	2034	1343	1058	2698	2748	2925	1999	2004	2054	1507	0	0	0	0	0	3114	1188	3776	7160	8016
TBB1_HUMAN	Tubulin beta-1 chain	2030	1855	1772	2143	1882	3623	2134	2581	1863	1926	1257	1750	1247	1654	1392	0	0	0	0	0
CTHL2_BOVIN	Cathelicidin-2 (Bactenecin-5) (Bac5) (PR-42)	2026	1733	1594	1064	1247	1528	1710	1364	1526	1218	0	0	0	0	0	1376	1604	3302	13553	1329
CDC37_BOVIN	Hsp90 co-chaperone Cdc37 (Hsp90 chaperone protein kinase-targeting subunit) (p50Cdc37) [Cleaved into: Hsp90 co-chaperone Cdc37, N-terminally processed]	2021	1045	1307	1263	1620	1181	1524	1110	2036	1112	0	0	0	0	0	7509	5244	5869	6623	4587
COMP_HUMAN	Cartilage oligomeric matrix protein (COMP) (Thrombospondin-5) (TSP5)	2009	1557	864	903	1757	1242	2710	2151	2086	2070	1126	1000	565	851	1590	0	0	0	0	0
SNX6_HUMAN	Sorting nexin-6 (TRAF4-associated factor 2) [Cleaved into: Sorting nexin-6, N-terminally processed]	1994	1561	1794	1547	1664	1583	753	1336	1346	1261	1118	1085	1111	870	891	0	0	0	0	0
TCPZ_BOVIN	T-complex protein 1 subunit zeta (TCP-1-zeta) (CCT-zeta) (CCT-zeta-1)	1990	1404	1393	1299	1141	978	1795	980	1790	1397	0	0	0	0	0	1709	826	4328	10610	1068
NSF_HUMAN	Vesicle-fusing ATPase (EC 3.6.4.6) (N-ethylmaleimide-sensitive fusion protein) (NEM-sensitive fusion protein) (Vesicular-fusion protein NSF)	1988	1498	1366	1776	2263	1880	1919	2087	1615	1712	2012	1313	1622	1327	1821	0	0	0	0	0
STXB2_HUMAN	Syntaxin-binding protein 2 (Protein unc-18 homolog 2) (Unc18-2) (Protein unc-18 homolog B) (Unc-18B)	1976	1677	1643	1338	948	973	617	967	1810	1162	1381	990	1352	1023	1415	0	0	0	0	0
ZA2G_BOVIN	Zinc-alpha-2-glycoprotein (Zn-alpha-2-GP) (Zn-alpha-2-glycoprotein)	1964	1775	2158	4515	4671	6320	4563	3741	2918	2671	0	0	0	0	0	852	784	823	717	548
CASP6_BOVIN	Caspase-6 (CASP-6) (EC 3.4.22.59) [Cleaved into: Caspase-6 subunit p18; Caspase-6 subunit p11]	1958	1160	1767	1609	1750	1482	1547	1473	1537	1464	0	0	0	0	0	1315	1163	1307	2183	821
HSPB1_BOVIN	Heat shock protein beta-1 (HspB1) (Heat shock 27 kDa protein) (HSP 27)	1958	1923	2041	1363	1329	1617	2461	1585	2129	1339	0	0	0	0	0	10029	2759	41286	28114	19070
KRT83_BOVIN	Keratin, type II cuticular Hb3 (Keratin-83) (K83) (Type II hair keratin Hb3) (Type-II keratin Kb23)	1932	1032	1074	1643	3610	1275	1953	1346	1167	1420	0	0	0	0	0	1847	1272	2102	1043	1096
CALX_HUMAN	Calnexin (IP90) (Major histocompatibility complex class I antigen-binding protein p88) (p90)	1916	1027	1111	1016	1770	998	1819	995	1809	993	1515	828	888	799	1442	0	0	0	0	0
PPP5_HUMAN	Serine/threonine-protein phosphatase 5 (PP5) (EC 3.1.3.16) (Protein phosphatase T) (PP-T) (PPT)	1913	1533	1679	1012	869	1118	1876	1060	1778	1004	937	1750	988	1490	841	0	0	0	0	0
RELN_HUMAN	Reelin (EC 3.4.21.-)	1892	1102	859	1697	1840	1344	1986	1346	1541	1421	1483	1113	1482	997	1454	0	0	0	0	0
AT1B1_HUMAN	Sodium/potassium-transporting ATPase subunit beta-1 (Sodium/potassium-dependent ATPase subunit beta-1)	1891	1661	1549	991	798	1091	1831	1034	1735	980	914	1707	964	1453	821	0	0	0	0	0
FLNC_HUMAN	Filamin-C (FLN-C) (FLNc) (ABP-280-like protein) (ABP-L) (Actin-binding-like protein) (Filamin-2) (Gamma-filamin)	1882	1138	1250	1874	1917	2298	2848	1454	1413	1453	1368	752	1368	712	1301	0	0	0	0	0
PTPRC_HUMAN	Receptor-type tyrosine-protein phosphatase C (EC 3.1.3.48) (Leukocyte common antigen) (L-CA) (T200) (CD antigen CD45)	1879	1478	2174	2465	4022	2208	2855	4363	7120	2293	1072	3373	2086	882	813	0	0	0	0	0
DAG1_BOVIN	Dystroglycan 1 (Dystroglycan) (Dystrophin-associated glycoprotein 1) [Cleaved into: Alpha-dystroglycan (Alpha-DG); Beta-dystroglycan (Beta-DG)]	1878	2215	1484	1138	1113	1072	1799	1544	2749	881	0	0	0	0	0	1270	1761	5543	1991	4965
PA2G4_HUMAN	Proliferation-associated protein 2G4 (Cell cycle protein p38-2G4 homolog) (hG4-1) (ErbB3-binding protein 1)	1861	1782	1416	2403	2209	1632	1521	1691	1864	2436	2519	1616	2480	1545	2403	0	0	0	0	0
SC31A_HUMAN	Protein transport protein Sec31A (ABP125) (ABP130) (SEC31-like protein 1) (SEC31-related protein A) (Web1-like protein)	1860	1738	1983	1233	1714	1196	1317	1236	1175	1104	1003	965	943	1652	911	0	0	0	0	0
TETN_BOVIN	Tetranectin (TN) (C-type lectin domain family 3 member B)	1857	1560	1750	2369	2282	6152	5211	3416	3033	3230	0	0	0	0	0	27327	5823	474545	350692	52257
XYLB_BOVIN	Xylulose kinase (Xylulokinase) (EC 2.7.1.17)	1856	1963	1792	1009	1021	890	1754	939	1851	991	0	0	0	0	0	989	1754	8075	7620	1191
K2C7_HUMAN	Keratin, type II cytoskeletal 7 (Cytokeratin-7) (CK-7) (Keratin-7) (K7) (Sarcolectin) (Type-II keratin Kb7)	1853	2356	2354	1495	2042	1926	1861	2150	2374	2385	2267	2512	2068	2274	1679	0	0	0	0	0
PDC10_HUMAN	Programmed cell death protein 10 (Cerebral cavernous malformations 3 protein) (TF-1 cell apoptosis-related protein 15)	1853	1126	1925	2249	1601	1747	3500	1274	2248	2836	1768	1121	1744	975	1773	0	0	0	0	0
DSC1_BOVIN	Desmocollin-1 (Desmosomal glycoprotein 2/3) (DG2/DG3)	1845	2010	2202	956	1180	1442	1590	1433	1580	846	0	0	0	0	0	1364	1284	9277	8198	778
PGK1_BOVIN	Phosphoglycerate kinase 1 (EC 2.7.2.3)	1841	2517	2306	2554	2485	2455	2258	2630	2446	2704	0	0	0	0	0	4384	1788	22002	125639	16247
FHOD1_HUMAN	FH1/FH2 domain-containing protein 1 (Formin homolog overexpressed in spleen 1) (FHOS) (Formin homology 2 domain-containing protein 1)	1841	1280	1523	1363	1393	1250	1907	1051	1908	1234	1367	2016	1363	1096	1381	0	0	0	0	0
SPB5_HUMAN	Serpin B5 (Maspin) (Peptidase inhibitor 5) (PI-5)	1825	877	1505	1729	1326	1520	1585	1212	1538	699	4056	2016	2060	2128	2912	0	0	0	0	0
PLSL_HUMAN	Plastin-2 (L-plastin) (LC64P) (Lymphocyte cytosolic protein 1) (LCP-1)	1819	3145	3833	2610	2810	9512	3351	3473	2328	3257	2723	2046	2742	3065	2654	0	0	0	0	0
K1H1_HUMAN	Keratin, type I cuticular Ha1 (Hair keratin, type I Ha1) (Keratin-31) (K31)	1816	1672	1619	1145	1120	1142	1001	1529	1565	1426	968	1566	987	1487	919	0	0	0	0	0
UBA1_BOVIN	Ubiquitin-like modifier-activating enzyme 1 (EC 6.2.1.45) (Ubiquitin-activating enzyme E1)	1809	1392	1328	804	862	842	1678	1005	1724	968	0	0	0	0	0	25583	5871	17747	23886	27163
LG3BP_HUMAN	Galectin-3-binding protein (Basement membrane autoantigen p105) (Lectin galactoside-binding soluble 3-binding protein) (Mac-2-binding protein) (MAC2BP) (Mac-2 BP) (Tumor-associated antigen 90K)	1807	2115	2977	3148	3590	1506	2060	5024	4177	3541	1712	5539	3187	770	1540	0	0	0	0	0
SOMA_BOVIN	Somatotropin (Growth hormone)	1803	1301	1386	1315	1201	1607	684	1485	1224	1326	0	0	0	0	0	9986	803	9253	8371	12956
CATB_BOVIN	Cathepsin B (EC 3.4.22.1) (BCSB) [Cleaved into: Cathepsin B light chain; Cathepsin B heavy chain]	1795	1475	1563	2711	2404	3575	2947	3704	2083	3438	0	0	0	0	0	4660	1362	38630	18974	1443
PSMD1_HUMAN	26S proteasome non-ATPase regulatory subunit 1 (26S proteasome regulatory subunit RPN2) (26S proteasome regulatory subunit S1) (26S proteasome subunit p112)	1789	1863	1612	1202	1545	1398	1442	1043	1506	1067	1101	1653	1094	1635	1094	0	0	0	0	0
BMP3_BOVIN	Bone morphogenetic protein 3 (BMP-3) (Osteogenin)	1785	1291	972	1051	1665	1230	1330	1149	1256	1079	0	0	0	0	0	8570	652	4239	2919	7058
UPP2_HUMAN	Uridine phosphorylase 2 (UPase 2) (UrdPase 2) (EC 2.4.2.3)	1778	1515	1479	963	846	1022	1768	987	1718	961	917	1700	951	1519	851	0	0	0	0	0
SYYC_BOVIN	Tyrosine--tRNA ligase, cytoplasmic (EC 6.1.1.1) (Tyrosyl-tRNA synthetase) (TyrRS) [Cleaved into: Tyrosine--tRNA ligase, cytoplasmic, N-terminally processed]	1772	1574	2026	868	835	939	1702	932	1704	930	0	0	0	0	0	793	1424	782	4240	745
DYN3_HUMAN	Dynamin-3 (EC 3.6.5.5) (Dynamin, testicular) (T-dynamin)	1771	2504	1540	1422	1463	1339	1410	1265	1311	1188	1170	1159	1111	1089	869	0	0	0	0	0
G6PD_HUMAN	Glucose-6-phosphate 1-dehydrogenase (G6PD) (EC 1.1.1.49)	1770	1539	1276	1130	950	1039	1759	1472	1345	1096	1019	1059	977	1434	881	0	0	0	0	0
MP2K1_HUMAN	Dual specificity mitogen-activated protein kinase kinase 1 (MAP kinase kinase 1) (MAPKK 1) (MKK1) (EC 2.7.12.2) (ERK activator kinase 1) (MAPK/ERK kinase 1) (MEK 1)	1767	1877	1598	2320	2339	2197	2003	2174	1729	1568	1605	1776	1521	2086	1787	0	0	0	0	0
KRT36_HUMAN	Keratin, type I cuticular Ha6 (Hair keratin, type I Ha6) (Keratin-36) (K36)	1766	2523	1491	1410	65324	1047	4585	928	1242	903	5136	1337	937	3123	1394	0	0	0	0	0
PTPRS_HUMAN	Receptor-type tyrosine-protein phosphatase S (R-PTP-S) (EC 3.1.3.48) (Receptor-type tyrosine-protein phosphatase sigma) (R-PTP-sigma)	1765	1844	1392	1222	1628	1355	1702	1338	1660	1278	1033	1309	1031	1398	1173	0	0	0	0	0
DP13A_HUMAN	DCC-interacting protein 13-alpha (Dip13-alpha) (Adapter protein containing PH domain, PTB domain and leucine zipper motif 1)	1763	1173	1371	1580	2446	1604	1380	1475	1283	1363	1338	1133	1267	1101	1141	0	0	0	0	0
XRCC5_HUMAN	X-ray repair cross-complementing protein 5 (EC 3.6.4.-) (86 kDa subunit of Ku antigen) (ATP-dependent DNA helicase 2 subunit 2) (ATP-dependent DNA helicase II 80 kDa subunit) (CTC box-binding factor 85 kDa subunit) (CTC85) (CTCBF) (DNA repair protein XRCC5) (Ku80) (Ku86) (Lupus Ku autoantigen protein p86) (Nuclear factor IV) (Thyroid-lupus autoantigen) (TLAA) (X-ray repair complementing defective…	1760	2009	1115	904	2452	1233	1233	1101	1101	489	1131	1280	1039	552	1075	0	0	0	0	0
NUDC_BOVIN	Nuclear migration protein nudC (Nuclear distribution protein C homolog)	1758	1127	1054	998	1658	901	1776	951	1874	1003	0	0	0	0	0	10227	1823	11980	7848	9375
T132C_HUMAN	Transmembrane protein 132C	1742	1611	841	1470	1173	1716	1779	1277	1244	1243	1452	1222	1357	1185	1290	0	0	0	0	0
UBA1_HUMAN	Ubiquitin-like modifier-activating enzyme 1 (EC 6.2.1.45) (Protein A1S9) (Ubiquitin-activating enzyme E1)	1742	1638	1609	1113	1111	814	1519	829	1238	842	1033	1452	1090	1236	1407	0	0	0	0	0
HIPL1_HUMAN	HHIP-like protein 1	1740	1851	1439	994	1013	1297	1460	1205	1349	1114	876	1579	859	1554	854	0	0	0	0	0
ERP44_BOVIN	Endoplasmic reticulum resident protein 44 (ER protein 44) (ERp44) (Thioredoxin domain-containing protein 4)	1739	1627	1647	1208	821	1363	1257	1266	1168	1183	0	0	0	0	0	1141	1813	1991	1165	4046
G3ST4_BOVIN	Galactose-3-O-sulfotransferase 4 (Gal3ST-4) (EC 2.8.2.-) (Beta-galactose-3-O-sulfotransferase 4) (Gal-beta-1,3-GalNAc 3'-sulfotransferase)	1736	1512	1858	1476	1052	1487	1376	1412	1284	1333	0	0	0	0	0	10142	1436	5504	5540	6509
APLP1_HUMAN	Amyloid beta precursor like protein 1 (Amyloid beta (A4) precursor-like protein 1) (Amyloid-like protein 1) (APLP) (APLP-1) [Cleaved into: C30]	1734	4218	4060	1267	1266	1421	1229	1356	1168	1296	1160	947	1153	759	1678	0	0	0	0	0
MFAP5_BOVIN	Microfibrillar-associated protein 5 (MFAP-5) (MP25) (Microfibril-associated glycoprotein 2) (MAGP-2)	1733	1731	1308	1752	1457	908	1524	1541	1361	1376	0	0	0	0	0	1596	1066	14402	8892	1040
HUTI_BOVIN	Probable imidazolonepropionase (EC 3.5.2.7) (Amidohydrolase domain-containing protein 1)	1733	1606	1382	1090	1055	1193	1671	1137	1578	1084	0	0	0	0	0	10694	1670	4649	12080	12011
PDIA3_BOVIN	Protein disulfide-isomerase A3 (EC 5.3.4.1) (58 kDa glucose-regulated protein) (58 kDa microsomal protein) (p58) (Disulfide isomerase ER-60) (Endoplasmic reticulum resident protein 57) (ER protein 57) (ERp57) (Endoplasmic reticulum resident protein 60) (ER protein 60) (ERp60)	1729	1580	1732	1308	1276	1162	1479	1182	1489	1048	0	0	0	0	0	12839	1823	6881	11237	11654
NMRL1_BOVIN	NmrA-like family domain-containing protein 1	1729	1690	1127	1152	1070	1219	1485	1208	1491	1201	0	0	0	0	0	3191	1146	16664	26338	19254
CORO7_BOVIN	Coronin-7 (Crn7)	1725	1558	1438	802	891	1060	1778	1004	1685	952	0	0	0	0	0	6382	1954	6014	3463	5428
DYHC1_HUMAN	Cytoplasmic dynein 1 heavy chain 1 (Cytoplasmic dynein heavy chain 1) (Dynein heavy chain, cytosolic)	1722	1669	1484	1089	1349	1250	1744	1249	1735	1226	1208	1594	1188	1248	1488	0	0	0	0	0
HTRA1_BOVIN	Serine protease HTRA1 (EC 3.4.21.-) (High-temperature requirement A serine peptidase 1) (Serine protease 11)	1714	1676	1318	1325	1452	921	1545	1184	1333	1348	0	0	0	0	0	1050	894	7495	8358	705
SERPH_BOVIN	Serpin H1 (Collagen-binding protein) (Colligin)	1712	1081	858	1830	1846	1112	1365	1105	1357	1098	0	0	0	0	0	1930	779	9061	16830	9382
FUMH_HUMAN	Fumarate hydratase, mitochondrial (Fumarase) (HsFH) (EC 4.2.1.2)	1702	1711	1634	881	998	893	1541	931	1468	857	800	1480	828	1311	813	0	0	0	0	0
PXDN_HUMAN	Peroxidasin homolog (EC 1.11.2.-) (Melanoma-associated antigen MG50) (Peroxidasin 1) (hsPxd01) (Vascular peroxidase 1) (p53-responsive gene 2 protein) [Cleaved into: PXDN active fragment]	1698	1666	1284	939	1064	1671	1603	972	1695	922	1118	1377	913	1172	891	0	0	0	0	0
RIR1_HUMAN	Ribonucleoside-diphosphate reductase large subunit (EC 1.17.4.1) (Ribonucleoside-diphosphate reductase subunit M1) (Ribonucleotide reductase large subunit)	1688	1642	1474	1040	1030	1254	1705	1063	1714	1074	930	1640	913	1490	998	0	0	0	0	0
EHD3_HUMAN	EH domain-containing protein 3 (PAST homolog 3)	1679	1775	1463	1121	1139	1587	1781	1140	1535	1316	1096	1811	1107	1423	1063	0	0	0	0	0
ADHX_BOVIN	Alcohol dehydrogenase class-3 (EC 1.1.1.1) (Alcohol dehydrogenase 5) (Alcohol dehydrogenase class-III) (Glutathione-dependent formaldehyde dehydrogenase) (FALDH) (FDH) (GSH-FDH) (EC 1.1.1.-) (S-(hydroxymethyl)glutathione dehydrogenase) (EC 1.1.1.284)	1668	1695	1663	1101	916	1042	1560	1024	1557	1008	0	0	0	0	0	961	1511	7065	9271	1617
FBLN4_HUMAN	EGF-containing fibulin-like extracellular matrix protein 2 (Fibulin-4) (FIBL-4) (Protein UPH1)	1660	1319	1853	1000	1189	806	645	763	1391	1101	827	882	794	843	684	0	0	0	0	0
DPYD_BOVIN	Dihydropyrimidine dehydrogenase [NADP(+)] (DHPDHase) (DPD) (EC 1.3.1.2) (Dihydrothymine dehydrogenase) (Dihydrouracil dehydrogenase)	1654	2008	1642	741	1637	2125	1449	1454	699	938	0	0	0	0	0	1277	963	910	1747	1468
NPL_BOVIN	N-acetylneuraminate lyase (NALase) (EC 4.1.3.3) (N-acetylneuraminate pyruvate-lyase) (N-acetylneuraminic acid aldolase) (Sialate lyase) (Sialate-pyruvate lyase) (Sialic acid aldolase) (Sialic acid lyase)	1651	1537	1680	1194	1153	1003	1514	979	1105	916	0	0	0	0	0	3702	1589	6515	8798	2494
PP1R7_BOVIN	Protein phosphatase 1 regulatory subunit 7 (Protein phosphatase 1 regulatory subunit 22)	1648	1521	1333	1422	1328	1581	1351	1328	1197	1250	0	0	0	0	0	1877	822	7175	6369	11198
AT1A3_HUMAN	Sodium/potassium-transporting ATPase subunit alpha-3 (Na(+)/K(+) ATPase alpha-3 subunit) (EC 7.2.2.13) (Na(+)/K(+) ATPase alpha(III) subunit) (Sodium pump subunit alpha-3)	1647	1443	1581	1196	809	1307	1260	1167	1958	1106	1031	1926	1088	1640	926	0	0	0	0	0
SPON1_BOVIN	Spondin-1 (F-spondin) (Vascular smooth muscle cell growth-promoting factor)	1646	2405	1740	869	1078	2179	1421	1076	2754	704	0	0	0	0	0	2044	1464	28223	27825	1015
CASA1_BOVIN	Alpha-S1-casein (allergen Bos d 8) [Cleaved into: Antioxidant peptide]	1641	1130	1212	1157	1458	923	1382	1176	1490	1151	0	0	0	0	0	14695	18490	42477	10974	13583
EF1G_BOVIN	Elongation factor 1-gamma (EF-1-gamma) (eEF-1B gamma)	1641	1536	1562	1405	1246	1565	1603	1479	1431	1321	0	0	0	0	0	875	852	821	7209	919
SYWC_BOVIN	Tryptophan--tRNA ligase, cytoplasmic (EC 6.1.1.2) (Tryptophanyl-tRNA synthetase) (TrpRS) [Cleaved into: T1-TrpRS; T2-TrpRS]	1638	1374	1627	1437	939	1289	1634	1292	2161	1212	0	0	0	0	0	2003	1410	6995	8954	8303
CLIP1_HUMAN	CAP-Gly domain-containing linker protein 1 (Cytoplasmic linker protein 1) (Cytoplasmic linker protein 170 alpha-2) (CLIP-170) (Reed-Sternberg intermediate filament-associated protein) (Restin)	1629	1506	1776	1660	1031	1555	1334	1485	1254	1409	656	1183	1258	1160	631	0	0	0	0	0
XPP1_BOVIN	Xaa-Pro aminopeptidase 1 (EC 3.4.11.9) (Aminoacylproline aminopeptidase) (Cytosolic aminopeptidase P) (Soluble aminopeptidase P) (sAmp) (X-Pro aminopeptidase 1) (X-prolyl aminopeptidase 1, soluble)	1628	1630	1316	1055	846	1033	1460	996	1414	973	0	0	0	0	0	15057	2324	15623	18412	15192
A4_HUMAN	Amyloid-beta precursor protein (APP) (ABPP) (APPI) (Alzheimer disease amyloid A4 protein homolog) (Alzheimer disease amyloid protein) (Amyloid precursor protein) (Amyloid-beta (A4) precursor protein) (Amyloid-beta A4 protein) (Cerebral vascular amyloid peptide) (CVAP) (PreA4) (Protease nexin-II) (PN-II) [Cleaved into: N-APP; Soluble APP-alpha (S-APP-alpha); Soluble APP-beta (S-APP-beta); C99 (Bet…	1628	1652	1557	1121	1081	1382	1502	1130	1630	1138	999	1383	1015	1361	956	0	0	0	0	0
PARK7_BOVIN	Parkinson disease protein 7 homolog (Maillard deglycase) (Parkinsonism-associated deglycase) (Protein DJ-1) (DJ-1) (Protein/nucleic acid deglycase DJ-1) (EC 3.1.2.-, EC 3.5.1.-, EC 3.5.1.124)	1627	1437	1512	2405	1067	3232	2025	893	947	836	0	0	0	0	0	18999	745	13465	11777	21756
TPMT_BOVIN	Thiopurine S-methyltransferase (EC 2.1.1.67) (Thiopurine methyltransferase)	1626	1295	1031	1310	1150	1140	1986	1296	1456	1041	0	0	0	0	0	2021	1000	9519	18740	11276
SCFD1_HUMAN	Sec1 family domain-containing protein 1 (SLY1 homolog) (Sly1p) (Syntaxin-binding protein 1-like 2)	1621	1256	1358	1222	1159	1075	1504	1071	1499	1263	1103	1063	1040	1554	1017	0	0	0	0	0
MATN3_HUMAN	Matrilin-3	1617	2041	2075	1121	1165	2024	1532	1952	1975	1103	1077	1565	1108	1428	1572	0	0	0	0	0
CN37_BOVIN	2',3'-cyclic-nucleotide 3'-phosphodiesterase (CNP) (CNPase) (EC 3.1.4.37) (Elastase 2',3'-cyclic-nucleotide 3'-phosphodiesterase)	1614	1350	1369	1010	837	1042	1542	1090	1533	940	0	0	0	0	0	1314	1245	5357	5168	1524
KT33B_HUMAN	Keratin, type I cuticular Ha3-II (Hair keratin, type I Ha3-II) (Keratin-33B) (K33B)	1610	1714	1331	1111	1388	1010	1831	926	1431	890	1250	1766	1106	1561	1071	0	0	0	0	0
LUM_HUMAN	Lumican (Keratan sulfate proteoglycan lumican) (KSPG lumican)	1607	2715	8192	894	4789	2663	1464	695	2036	1302	2801	5870	1975	1009	983	0	0	0	0	0
UBP14_BOVIN	Ubiquitin carboxyl-terminal hydrolase 14 (EC 3.4.19.12) (Deubiquitinating enzyme 14) (Ubiquitin thioesterase 14) (Ubiquitin-specific-processing protease 14)	1596	2153	1226	1410	2256	1130	1397	1067	1278	1002	0	0	0	0	0	1963	2003	22382	26078	1033
STAB2_HUMAN	Stabilin-2 (FAS1 EGF-like and X-link domain-containing adhesion molecule 2) (Fasciclin, EGF-like, laminin-type EGF-like and link domain-containing scavenger receptor 2) (FEEL-2) (Hyaluronan receptor for endocytosis) [Cleaved into: 190 kDa form stabilin-2 (190 kDa hyaluronan receptor for endocytosis)]	1585	1281	1412	1260	2060	1264	1318	1500	1189	1084	988	1035	982	830	788	0	0	0	0	0
HMCS1_HUMAN	Hydroxymethylglutaryl-CoA synthase, cytoplasmic (HMG-CoA synthase) (EC 2.3.3.10) (3-hydroxy-3-methylglutaryl coenzyme A synthase)	1584	1445	1732	1106	1166	531	2094	878	1730	966	636	1189	671	1012	862	0	0	0	0	0
CPSM_HUMAN	Carbamoyl-phosphate synthase [ammonia], mitochondrial (EC 6.3.4.16) (Carbamoyl-phosphate synthetase I) (CPSase I)	1582	1604	1902	1325	1331	1495	1504	1342	1406	1212	1124	1260	1082	1183	975	0	0	0	0	0
PMM2_BOVIN	Phosphomannomutase 2 (PMM 2) (EC 5.4.2.8)	1580	1684	1626	1053	1435	1146	1575	1086	1537	1036	0	0	0	0	0	4430	2022	16685	15257	13863
APT_BOVIN	Adenine phosphoribosyltransferase (APRT) (EC 2.4.2.7)	1569	1729	1870	1232	1109	3073	1485	971	1219	957	0	0	0	0	0	1687	1414	6301	2936	1086
FRIH_BOVIN	Ferritin heavy chain (Ferritin H subunit) (EC 1.16.3.1) [Cleaved into: Ferritin heavy chain, N-terminally processed]	1554	1418	1305	994	920	2005	1447	1343	1613	968	0	0	0	0	0	1126	1379	3362	2183	4588
ARY1_BOVIN	Arylamine N-acetyltransferase 1 (EC 2.3.1.5) (Arylamide acetylase 1) (N-acetyltransferase type 1) (NAT-1)	1549	1249	1039	1575	1550	1340	1331	1308	1229	1277	0	0	0	0	0	19696	1129	23759	15909	36926
TCPB_BOVIN	T-complex protein 1 subunit beta (TCP-1-beta) (CCT-beta)	1547	1626	1955	1341	1199	1367	1341	1264	1289	1174	0	0	0	0	0	1277	1377	2899	3492	5986
PFKAP_HUMAN	ATP-dependent 6-phosphofructokinase, platelet type (ATP-PFK) (PFK-P) (EC 2.7.1.11) (6-phosphofructokinase type C) (Phosphofructo-1-kinase isozyme C) (PFK-C) (Phosphohexokinase)	1542	1154	1127	1289	1502	1257	1552	1315	969	1305	1637	1002	1308	1081	1746	0	0	0	0	0
TKFC_BOVIN	Triokinase/FMN cyclase (Bifunctional ATP-dependent dihydroxyacetone kinase/FAD-AMP lyase (cyclizing)) [Includes: ATP-dependent dihydroxyacetone kinase (DHA kinase) (EC 2.7.1.28) (EC 2.7.1.29) (Glycerone kinase) (Triokinase) (Triose kinase); FAD-AMP lyase (cyclizing) (EC 4.6.1.15) (FAD-AMP lyase (cyclic FMN forming)) (FMN cyclase)]	1541	1552	1598	893	891	689	1219	719	1392	749	0	0	0	0	0	852	1318	1157	6973	2361
SYRC_BOVIN	Arginine--tRNA ligase, cytoplasmic (EC 6.1.1.19) (Arginyl-tRNA synthetase) (ArgRS)	1540	1834	1696	1281	1382	1238	1312	1152	799	1141	0	0	0	0	0	1559	1238	1284	6068	1652
KRT35_HUMAN	Keratin, type I cuticular Ha5 (Hair keratin, type I Ha5) (Keratin-35) (K35)	1536	1808	1550	946	32711	1328	1436	957	1486	943	904	1649	909	1509	837	0	0	0	0	0
C1QB_BOVIN	Complement C1q subcomponent subunit B	1535	2312	2551	2948	2457	4556	1797	2512	2227	1876	0	0	0	0	0	54108	2250	24942	21304	79378
LYAM3_BOVIN	P-selectin (CD62 antigen-like family member P) (Granule membrane protein 140) (GMP-140) (Leukocyte-endothelial cell adhesion molecule 3) (LECAM3) (Platelet activation dependent granule-external membrane protein) (PADGEM) (CD antigen CD62P)	1534	1255	1553	1276	1064	1146	1481	1098	1879	1054	0	0	0	0	0	755	1236	15367	13100	1473
CHSP1_HUMAN	Calcium-regulated heat-stable protein 1 (Calcium-regulated heat-stable protein of 24 kDa) (CRHSP-24)	1526	2044	1649	1368	1548	1241	1139	1140	1285	1133	1377	1327	1293	1294	1179	0	0	0	0	0
RENR_BOVIN	Renin receptor (ATPase H(+)-transporting lysosomal accessory protein 2) (ATPase H(+)-transporting lysosomal-interacting protein 2) (Renin/prorenin receptor) (Vacuolar ATP synthase membrane sector-associated protein M8-9) (V-ATPase M8.9 subunit) [Cleaved into: Renin receptor extracellular fragment; Renin receptor cytoplasmic fragment]	1525	1820	1318	1010	1289	2182	2060	2472	1980	1092	0	0	0	0	0	9142	1099	8987	4688	12128
SAA2_HUMAN	Serum amyloid A-2 protein (SAA2) [Cleaved into: Amyloid A2 protein (AA2)]	1520	1620	1745	3246	6354	1728	819	927	986	1008	1112	1603	1139	2495	1238	0	0	0	0	0
ERF3A_HUMAN	Eukaryotic peptide chain release factor GTP-binding subunit ERF3A (Eukaryotic peptide chain release factor subunit 3a) (eRF3a) (G1 to S phase transition protein 1 homolog)	1514	1437	1119	1026	1210	2974	1358	869	2000	886	993	1480	951	880	999	0	0	0	0	0
SCLY_BOVIN	Selenocysteine lyase (EC 4.4.1.16)	1509	1882	1619	826	906	1726	1349	722	1423	762	0	0	0	0	0	8306	1571	9532	10632	12626
METK1_BOVIN	S-adenosylmethionine synthase isoform type-1 (AdoMet synthase 1) (EC 2.5.1.6) (Methionine adenosyltransferase 1) (MAT 1)	1503	788	1331	1452	1378	1031	1445	1017	1438	1232	0	0	0	0	0	10374	1050	11484	29985	12699
GLCNE_HUMAN	Bifunctional UDP-N-acetylglucosamine 2-epimerase/N-acetylmannosamine kinase (UDP-GlcNAc-2-epimerase/ManAc kinase) [Includes: UDP-N-acetylglucosamine 2-epimerase (hydrolyzing) (EC 3.2.1.183) (UDP-GlcNAc-2-epimerase) (Uridine diphosphate-N-acetylglucosamine-2-epimerase); N-acetylmannosamine kinase (EC 2.7.1.60) (ManAc kinase)]	1497	1024	820	1778	1567	855	1486	1216	1072	1243	1990	1124	1741	957	1788	0	0	0	0	0
GPX3_BOVIN	Glutathione peroxidase 3 (GPx-3) (GSHPx-3) (EC 1.11.1.9) (Plasma glutathione peroxidase) (GPx-P) (GSHPx-P)	1492	1821	1104	1201	2262	4609	2374	4048	4353	2265	0	0	0	0	0	1464	1310	35966	79009	9499
TSP1_HUMAN	Thrombospondin-1 (Glycoprotein G)	1487	1613	1121	828	1679	908	1264	929	1313	869	1085	1576	1028	785	1208	0	0	0	0	0
GPX1_BOVIN	Glutathione peroxidase 1 (GPx-1) (GSHPx-1) (EC 1.11.1.9) (Cellular glutathione peroxidase)	1482	1466	1637	1657	1414	1800	1314	1215	1901	1553	0	0	0	0	0	10618	1757	56754	68792	14225
ATF6B_HUMAN	Cyclic AMP-dependent transcription factor ATF-6 beta (cAMP-dependent transcription factor ATF-6 beta) (Activating transcription factor 6 beta) (ATF6-beta) (Protein G13) (cAMP response element-binding protein-related protein) (Creb-rp) (cAMP-responsive element-binding protein-like 1) [Cleaved into: Processed cyclic AMP-dependent transcription factor ATF-6 beta]	1481	1217	1187	926	784	863	1497	910	1579	960	981	1542	940	1496	1069	0	0	0	0	0
SPTB2_HUMAN	Spectrin beta chain, non-erythrocytic 1 (Beta-II spectrin) (Fodrin beta chain) (Spectrin, non-erythroid beta chain 1)	1481	1413	1707	904	1019	1294	1981	1239	1915	1187	918	1418	870	1652	1002	0	0	0	0	0
OTUB1_HUMAN	Ubiquitin thioesterase OTUB1 (EC 3.4.19.12) (Deubiquitinating enzyme OTUB1) (OTU domain-containing ubiquitin aldehyde-binding protein 1) (Otubain-1) (hOTU1) (Ubiquitin-specific-processing protease OTUB1)	1480	1338	970	968	1735	954	1394	769	1361	889	1769	1306	859	864	1590	0	0	0	0	0
DCTN1_HUMAN	Dynactin subunit 1 (150 kDa dynein-associated polypeptide) (DAP-150) (DP-150) (p135) (p150-glued)	1478	1365	1420	1155	1383	1302	1489	1337	1526	1383	1120	845	1146	1668	1345	0	0	0	0	0
LAMB1_HUMAN	Laminin subunit beta-1 (Laminin B1 chain) (Laminin-1 subunit beta) (Laminin-10 subunit beta) (Laminin-12 subunit beta) (Laminin-2 subunit beta) (Laminin-6 subunit beta) (Laminin-8 subunit beta)	1477	1579	960	1175	1577	1172	2806	2140	1385	1855	1004	1383	991	1469	1595	0	0	0	0	0
FBN2_HUMAN	Fibrillin-2 [Cleaved into: Placensin]	1477	1398	1397	1196	1115	1183	1372	1147	1608	1046	967	1561	1195	1233	977	0	0	0	0	0
COMT_BOVIN	Catechol O-methyltransferase (EC 2.1.1.6)	1474	1382	1130	785	1014	859	1409	822	1306	788	0	0	0	0	0	7101	1572	14899	11194	16187
CO6A2_HUMAN	Collagen alpha-2(VI) chain	1474	1553	1490	1936	1843	1439	1435	1429	1303	1526	1568	1331	1755	1213	1489	0	0	0	0	0
AL1A1_BOVIN	Aldehyde dehydrogenase 1A1 (EC 1.2.1.19) (EC 1.2.1.28) (EC 1.2.1.3) (EC 1.2.1.36) (3-deoxyglucosone dehydrogenase) (ALDH-E1) (ALHDII) (Aldehyde dehydrogenase family 1 member A1) (Aldehyde dehydrogenase, cytosolic) (Retinal dehydrogenase 1) (RALDH 1) (RalDH1)	1473	1240	1326	928	786	934	1481	939	1569	944	0	0	0	0	0	779	1338	6050	8298	5985
AL1L1_HUMAN	Cytosolic 10-formyltetrahydrofolate dehydrogenase (10-FTHFDH) (FDH) (EC 1.5.1.6) (Aldehyde dehydrogenase family 1 member L1)	1463	1785	1433	1187	1217	1569	1413	1405	1266	1475	1020	1635	1028	1565	983	0	0	0	0	0
SVEP1_HUMAN	Sushi, von Willebrand factor type A, EGF and pentraxin domain-containing protein 1 (CCP module-containing protein 22) (Polydom) (Selectin-like osteoblast-derived protein) (SEL-OB) (Serologically defined breast cancer antigen NY-BR-38)	1458	1380	1481	918	1162	1103	1419	1059	1406	949	956	1220	927	1275	1017	0	0	0	0	0
SAP_BOVIN	Prosaposin (Proactivator polypeptide) [Cleaved into: Saposin-A (Protein A); Saposin-B (Cerebroside sulfate activator) (CSAct) (Dispersin) (Sphingolipid activator protein 1) (SAP-1) (Sulfatide/GM1 activator); Saposin-C (A1 activator) (Co-beta-glucosidase) (Glucosylceramidase activator) (Sphingolipid activator protein 2) (SAP-2); Saposin-D (Component C) (Protein C)]	1455	1280	1424	1216	1314	1919	2021	2946	1509	2173	0	0	0	0	0	1458	627	1254	710	643
NIBA1_HUMAN	Protein Niban 1 (Cell growth-inhibiting gene 39 protein) (Protein FAM129A)	1448	2022	791	1358	1356	1275	1139	1138	1017	1016	1096	1007	1035	966	1746	0	0	0	0	0
PDIA6_HUMAN	Protein disulfide-isomerase A6 (EC 5.3.4.1) (Endoplasmic reticulum protein 5) (ER protein 5) (ERp5) (Protein disulfide isomerase P5) (Thioredoxin domain-containing protein 7)	1435	1605	1765	1415	1199	1591	1416	1462	1311	1341	1246	1185	1184	1731	1111	0	0	0	0	0
CO5_BOVIN	Complement C5a anaphylatoxin	1434	1504	1651	2471	2805	8157	10904	11822	8063	12690	0	0	0	0	0	1177	635	3001	8768	607
COL12_BOVIN	Collectin-12 (Collectin placenta protein 1) (CL-P1)	1434	1497	1926	846	801	950	1179	891	1633	1031	0	0	0	0	0	4568	2338	5854	4701	5334
CAP1_BOVIN	Adenylyl cyclase-associated protein 1 (CAP 1)	1433	1232	1147	1225	1186	1284	1230	1185	1507	1307	0	0	0	0	0	6382	1468	20913	54079	15999
P20D1_BOVIN	N-fatty-acyl-amino acid synthase/hydrolase PM20D1 (EC 3.5.1.114) (EC 3.5.1.14) (Peptidase M20 domain-containing protein 1)	1430	1275	1860	1460	1386	3251	5336	3864	3409	6260	0	0	0	0	0	10485	3667	7134	8307	9120
HSP74_HUMAN	Heat shock 70 kDa protein 4 (HSP70RY) (Heat shock 70-related protein APG-2)	1423	1077	1234	1498	1527	1282	1379	1979	1358	1321	1434	1067	1436	1089	1358	0	0	0	0	0
TTC1_BOVIN	Tetratricopeptide repeat protein 1 (TPR repeat protein 1)	1420	1602	1767	908	899	714	1407	753	1485	795	0	0	0	0	0	1043	1470	2922	3017	1979
SERC_HUMAN	Phosphoserine aminotransferase (EC 2.6.1.52) (Phosphohydroxythreonine aminotransferase) (PSAT)	1412	753	840	830	1278	904	1146	645	1247	1202	1252	967	1256	905	1256	0	0	0	0	0
CPNS1_BOVIN	Calpain small subunit 1 (CSS1) (Calcium-activated neutral proteinase small subunit) (CANP small subunit) (Calcium-dependent protease small subunit) (CDPS) (Calcium-dependent protease small subunit 1) (Calpain regulatory subunit)	1409	1729	1176	984	1103	1291	1394	1011	1321	958	0	0	0	0	0	152509	91259	134812	93006	127154
LEGL_HUMAN	Galectin-related protein (Galectin-like protein) (Lectin galactoside-binding-like protein)	1403	1512	1414	1719	1388	2112	2057	2027	2101	1736	1347	1671	1421	1422	1210	0	0	0	0	0
PRDX5_BOVIN	Peroxiredoxin-5, mitochondrial (EC 1.11.1.24) (Peroxiredoxin V) (Prx-V) (Thioredoxin peroxidase) (Thioredoxin-dependent peroxiredoxin 5)	1400	1594	1478	2521	2405	5080	1335	2145	1715	2925	0	0	0	0	0	39164	1593	48149	35053	60932
PAIRB_HUMAN	Plasminogen activator inhibitor 1 RNA-binding protein (PAI1 RNA-binding protein 1) (PAI-RBP1) (SERPINE1 mRNA-binding protein 1)	1396	1520	999	1295	1610	834	1498	851	532	935	1168	1769	1125	1052	1008	0	0	0	0	0
CNDP2_BOVIN	Cytosolic non-specific dipeptidase (EC 3.4.13.18) (CNDP dipeptidase 2) (Threonyl dipeptidase)	1395	1275	1574	1411	1632	1228	1442	1267	1178	1338	0	0	0	0	0	18588	4331	21059	22955	20104
SEPT9_HUMAN	Septin-9 (MLL septin-like fusion protein MSF-A) (MLL septin-like fusion protein) (Ovarian/Breast septin) (Ov/Br septin) (Septin D1)	1395	1316	1089	1465	1904	1431	1465	2141	1284	1907	1525	1171	1483	1167	1628	0	0	0	0	0
NOTC1_HUMAN	Neurogenic locus notch homolog protein 1 (Notch 1) (hN1) (Translocation-associated notch protein TAN-1) [Cleaved into: Notch 1 extracellular truncation (NEXT); Notch 1 intracellular domain (NICD)]	1392	1915	2217	1677	1709	2103	1485	1126	1091	1046	1439	1318	1352	1239	678	0	0	0	0	0
PSMD9_BOVIN	26S proteasome non-ATPase regulatory subunit 9 (26S proteasome regulatory subunit p27)	1389	1320	773	980	1354	993	1092	952	1012	844	0	0	0	0	0	11636	2497	8259	5118	11317
PARVB_HUMAN	Beta-parvin (Affixin)	1388	1483	1749	942	1260	1284	1509	1379	1719	1241	944	1500	934	1497	973	0	0	0	0	0
FUBP1_HUMAN	Far upstream element-binding protein 1 (FBP) (FUSE-binding protein 1) (DNA helicase V) (hDH V)	1385	1059	933	1462	1904	1576	1121	1407	1001	1256	1643	928	1097	744	1390	0	0	0	0	0
ISK5_HUMAN	Serine protease inhibitor Kazal-type 5 (Lympho-epithelial Kazal-type-related inhibitor) (LEKTI) [Cleaved into: Hemofiltrate peptide HF6478; Hemofiltrate peptide HF7665]	1384	1254	1017	11815	1851	1232	1192	1224	1184	1217	2485	1359	2462	2169	3182	0	0	0	0	0
TICN2_HUMAN	Testican-2 (SPARC/osteonectin, CWCV, and Kazal-like domains proteoglycan 2)	1383	1332	1037	1095	1396	1240	1269	1179	1189	1117	1359	1208	1218	1001	1418	0	0	0	0	0
A16A1_BOVIN	Aldehyde dehydrogenase family 16 member A1	1382	1315	1151	756	764	834	1379	795	1360	773	0	0	0	0	0	10859	1319	11395	15608	19588
SCG1_BOVIN	Secretogranin-1 (Chromogranin-B) (CgB) (Secretogranin I) (SgI) [Cleaved into: PE-11; Secretogranin-1(476-566); Peptide BAM-1745; Secretolytin; CCB peptide]	1382	1488	1703	801	894	1472	1284	857	1452	814	0	0	0	0	0	4203	1696	4063	2840	3637
KS6A3_HUMAN	Ribosomal protein S6 kinase alpha-3 (S6K-alpha-3) (EC 2.7.11.1) (90 kDa ribosomal protein S6 kinase 3) (p90-RSK 3) (p90RSK3) (Insulin-stimulated protein kinase 1) (ISPK-1) (MAP kinase-activated protein kinase 1b) (MAPK-activated protein kinase 1b) (MAPKAP kinase 1b) (MAPKAPK-1b) (Ribosomal S6 kinase 2) (RSK-2) (pp90RSK2)	1381	1408	1689	1222	1354	1376	1508	1278	1401	1182	889	1031	818	944	813	0	0	0	0	0
TSP3_HUMAN	Thrombospondin-3	1369	1026	1437	1312	1434	1297	1081	1572	1166	1459	1376	974	1313	1065	1473	0	0	0	0	0
DCUP_HUMAN	Uroporphyrinogen decarboxylase (UPD) (URO-D) (EC 4.1.1.37)	1362	2163	1709	1249	1140	2244	1337	1330	1329	1322	1019	1903	1075	1620	915	0	0	0	0	0
CADH2_BOVIN	Cadherin-2 (Neural cadherin) (N-cadherin) (CD antigen CD325)	1360	1314	1426	2604	2596	2237	1407	2155	1538	2180	0	0	0	0	0	50356	1398	55501	30585	51523
CA2D1_HUMAN	Voltage-dependent calcium channel subunit alpha-2/delta-1 (Voltage-gated calcium channel subunit alpha-2/delta-1) [Cleaved into: Voltage-dependent calcium channel subunit alpha-2-1; Voltage-dependent calcium channel subunit delta-1]	1353	1451	1761	1884	1227	2185	1387	2047	1265	1438	817	1229	1125	1443	910	0	0	0	0	0
IQGA1_HUMAN	Ras GTPase-activating-like protein IQGAP1 (p195)	1352	1599	1048	1180	1331	1443	1279	1216	1327	889	1131	1488	1096	984	1323	0	0	0	0	0
NP1L4_BOVIN	Nucleosome assembly protein 1-like 4	1348	1794	1419	997	833	1531	1377	800	1152	627	0	0	0	0	0	24703	13162	32851	21300	27287
PGK1_HUMAN	Phosphoglycerate kinase 1 (EC 2.7.2.3) (Cell migration-inducing gene 10 protein) (Primer recognition protein 2) (PRP 2)	1345	1209	1751	899	866	1111	1170	1000	1618	986	1067	1261	961	1210	771	0	0	0	0	0
ELOB_HUMAN	Elongin-B (EloB) (Elongin 18 kDa subunit) (RNA polymerase II transcription factor SIII subunit B) (SIII p18) (Transcription elongation factor B polypeptide 2)	1340	1351	1243	866	792	1369	1468	921	1493	1069	933	1453	884	1707	1039	0	0	0	0	0
CATH_BOVIN	Pro-cathepsin H [Cleaved into: Cathepsin H mini chain; Cathepsin H (EC 3.4.22.16); Cathepsin H heavy chain; Cathepsin H light chain]	1339	1376	940	5353	6258	10918	5816	7996	12706	2212	0	0	0	0	0	1196	1228	1068	1096	1744
TCPA_BOVIN	T-complex protein 1 subunit alpha (TCP-1-alpha) (CCT-alpha)	1334	1511	1407	1009	771	1138	1249	1016	1705	963	0	0	0	0	0	1451	1025	6165	9674	8699
K2C8_HUMAN	Keratin, type II cytoskeletal 8 (Cytokeratin-8) (CK-8) (Keratin-8) (K8) (Type-II keratin Kb8)	1327	1664	1691	1694	1795	2211	1639	1690	1610	1594	2067	2073	1809	1941	2071	0	0	0	0	0
DBNL_BOVIN	Drebrin-like protein	1326	1244	1320	1062	1198	1260	1163	1350	1562	1290	0	0	0	0	0	3580	6309	16829	9308	11350
SNX1_BOVIN	Sorting nexin-1	1321	1548	1652	1246	1342	1263	1454	1167	1352	1073	0	0	0	0	0	1042	1319	2868	4395	3584
ALDR_BOVIN	Aldo-keto reductase family 1 member B1 (EC 1.1.1.21) (EC 1.1.1.300) (EC 1.1.1.372) (EC 1.1.1.54) (20-alpha-hydroxysteroid dehydrogenase) (20-alpha-HSD) (Aldehyde reductase) (Aldose reductase) (AR)	1319	1366	1204	1415	1282	1236	1218	1219	1130	1202	0	0	0	0	0	1393	789	12103	13845	1648
EF1D_BOVIN	Elongation factor 1-delta (EF-1-delta)	1316	1229	788	1113	1266	1154	1317	1089	1235	1034	0	0	0	0	0	24321	882	29379	18867	31815
KPYR_HUMAN	Pyruvate kinase PKLR (EC 2.7.1.40) (Pyruvate kinase 1) (Pyruvate kinase isozymes L/R) (R-type/L-type pyruvate kinase) (Red cell/liver pyruvate kinase)	1304	952	801	1045	1492	1344	1116	1274	1074	1186	1628	962	1648	883	1626	0	0	0	0	0
CAD11_HUMAN	Cadherin-11 (OSF-4) (Osteoblast cadherin) (OB-cadherin)	1303	1028	2278	2150	897	1811	1571	2324	1572	2446	1666	1128	1734	1824	1502	0	0	0	0	0
ANXA1_BOVIN	Annexin A1 (Annexin I) (Annexin-1) (Calpactin II) (Calpactin-2) (Chromobindin-9) (Lipocortin I) (Phospholipase A2 inhibitory protein) (p35) [Cleaved into: Annexin Ac2-26]	1302	976	1079	1964	1373	2012	1233	1794	1390	2047	0	0	0	0	0	3017	1114	9630	20451	8351
MATN1_HUMAN	Cartilage matrix protein (Matrilin-1)	1302	1297	1340	2236	2258	2435	1235	2308	1171	2187	2039	1152	2152	981	1832	0	0	0	0	0
MTNA_BOVIN	Methylthioribose-1-phosphate isomerase (M1Pi) (MTR-1-P isomerase) (EC 5.3.1.23) (S-methyl-5-thioribose-1-phosphate isomerase) (Translation initiation factor eIF-2B subunit alpha/beta/delta-like protein)	1301	1781	1432	1439	1616	2031	1101	2002	1086	985	0	0	0	0	0	2714	1249	2138	1994	3586
BASP1_BOVIN	Brain acid soluble protein 1 (22 kDa neuronal tissue-enriched acidic protein) (Neuronal axonal membrane protein NAP-22)	1298	883	961	1337	1291	1039	1268	957	1055	1370	0	0	0	0	0	8425	6767	6208	6938	10266
SGTA_BOVIN	Small glutamine-rich tetratricopeptide repeat-containing protein alpha (Alpha-SGT)	1289	1655	1258	1827	1653	1569	935	1655	986	1746	0	0	0	0	0	2267	994	6145	4386	6302
OLFL3_BOVIN	Olfactomedin-like protein 3	1287	1411	1294	1396	1351	1501	1440	1524	1772	1416	0	0	0	0	0	4162	2290	15880	19080	1678
HSP72_BOVIN	Heat shock-related 70 kDa protein 2 (Heat shock 70 kDa protein 3) (HSP70.3)	1284	1949	1386	1605	1085	1902	1134	2007	1196	2118	0	0	0	0	0	6768	857	6720	6473	9353
CBR1_BOVIN	Carbonyl reductase [NADPH] 1 (EC 1.1.1.184) (15-hydroxyprostaglandin dehydrogenase [NADP(+)]) (EC 1.1.1.196, EC 1.1.1.197) (20-beta-hydroxysteroid dehydrogenase) (Alcohol dehydrogenase [NAD(P)+] CBR1) (EC 1.1.1.71) (NADPH-dependent carbonyl reductase 1) (Prostaglandin 9-ketoreductase) (PG-9-KR) (Prostaglandin-E(2) 9-reductase) (EC 1.1.1.189)	1283	1533	1315	922	835	1416	1727	1044	1721	1014	0	0	0	0	0	6103	1476	10795	40619	9677
PRS6A_HUMAN	26S proteasome regulatory subunit 6A (26S proteasome AAA-ATPase subunit RPT5) (Proteasome 26S subunit ATPase 3) (Proteasome subunit P50) (Tat-binding protein 1) (TBP-1)	1278	1177	1288	1315	1444	1401	1476	1132	1177	1497	1251	1063	1282	1376	1198	0	0	0	0	0
PTPRD_HUMAN	Receptor-type tyrosine-protein phosphatase delta (Protein-tyrosine phosphatase delta) (R-PTP-delta) (EC 3.1.3.48)	1276	1243	978	775	1223	1487	1288	1482	1214	1329	919	1247	930	1173	1452	0	0	0	0	0
PCBP2_HUMAN	Poly(rC)-binding protein 2 (Alpha-CP2) (Heterogeneous nuclear ribonucleoprotein E2) (hnRNP E2)	1274	1563	1133	891	1104	882	1269	928	1238	690	880	1230	684	1138	1685	0	0	0	0	0
AGRE5_BOVIN	Adhesion G protein-coupled receptor E5 (Leukocyte antigen CD97) (CD antigen CD97) [Cleaved into: Adhesion G protein-coupled receptor E5 subunit alpha; Adhesion G protein-coupled receptor E5 subunit beta]	1270	1177	1114	1686	1469	1444	1061	1541	1124	1592	0	0	0	0	0	33869	7223	34145	31093	33591
PUR9_BOVIN	Bifunctional purine biosynthesis protein ATIC (AICAR transformylase/inosine monophosphate cyclohydrolase) (ATIC) [Includes: Phosphoribosylaminoimidazolecarboxamide formyltransferase (EC 2.1.2.3) (5-aminoimidazole-4-carboxamide ribonucleotide formyltransferase) (AICAR formyltransferase) (AICAR transformylase); Inosine 5'-monophosphate cyclohydrolase (IMP cyclohydrolase) (EC 3.5.4.10) (IMP synthase…	1267	1203	1341	1350	1476	1764	1395	1736	1466	1375	0	0	0	0	0	103201	77350	59385	98902	120951
PKDCC_HUMAN	Extracellular tyrosine-protein kinase PKDCC (EC 2.7.10.2) (Protein kinase domain-containing protein, cytoplasmic) (Protein kinase-like protein SgK493) (Sugen kinase 493) (Vertebrate lonesome kinase)	1265	1290	1466	1422	1055	1123	1056	1518	1398	1451	1250	1315	1209	1142	1066	0	0	0	0	0
NB5R3_BOVIN	NADH-cytochrome b5 reductase 3 (B5R) (Cytochrome b5 reductase) (EC 1.6.2.2) (Diaphorase-1)	1258	1888	1191	2148	1380	1883	1122	895	1063	1882	0	0	0	0	0	1458	889	1989	4619	2058
SBSN_BOVIN	Suprabasin	1243	984	954	1116	1338	1213	1409	1108	1089	1244	0	0	0	0	0	1992	1046	3401	1261	3266
GLOD4_HUMAN	Glyoxalase domain-containing protein 4	1241	1148	1017	1632	1779	2188	1485	1974	1305	1697	2162	1181	2142	1233	1602	0	0	0	0	0
GUAA_HUMAN	GMP synthase [glutamine-hydrolyzing] (EC 6.3.5.2) (GMP synthetase) (Glutamine amidotransferase)	1227	1560	1760	948	897	1179	1331	1097	1262	1039	977	1337	956	1593	1026	0	0	0	0	0
PLA1A_BOVIN	Phospholipase A1 member A (EC 3.1.1.111)	1226	1215	1334	1110	1267	1118	1260	1347	1118	1151	0	0	0	0	0	2029	1704	11770	19421	2525
COR1C_HUMAN	Coronin-1C (Coronin-3) (hCRNN4)	1223	1340	1527	1351	1265	860	1078	1761	1127	1092	1095	938	1089	753	873	0	0	0	0	0
VWF_HUMAN	von Willebrand factor (vWF) [Cleaved into: von Willebrand antigen 2 (von Willebrand antigen II)]	1220	1973	1386	1778	1439	1748	1072	1854	1067	1861	1470	1302	1373	1345	1350	0	0	0	0	0
NOTC2_HUMAN	Neurogenic locus notch homolog protein 2 (Notch 2) (hN2) [Cleaved into: Notch 2 extracellular truncation (N2ECD); Notch 2 intracellular domain (N2ICD)]	1218	1859	1422	1576	1561	1864	1105	1251	1123	1988	1354	1308	1279	1289	1149	0	0	0	0	0
AGM1_HUMAN	Phosphoacetylglucosamine mutase (PAGM) (EC 5.4.2.3) (Acetylglucosamine phosphomutase) (N-acetylglucosamine-phosphate mutase) (Phosphoglucomutase-3) (PGM 3)	1215	1282	1571	939	1110	1693	1026	1118	1383	1081	938	1268	916	1369	981	0	0	0	0	0
PRELP_BOVIN	Prolargin (Proline-arginine-rich end leucine-rich repeat protein)	1212	1321	1854	1228	1030	880	1194	1279	1256	953	0	0	0	0	0	20818	1769	21794	22793	25970
EFHD2_BOVIN	EF-hand domain-containing protein D2 (Swiprosin-1)	1211	1397	1299	1360	1518	1416	1234	1324	1131	1237	0	0	0	0	0	2863	1821	4113	2580	6076
SPRE_BOVIN	Sepiapterin reductase (SPR) (EC 1.1.1.153)	1206	1691	1162	1132	1558	1240	973	1107	869	988	0	0	0	0	0	2079	923	7387	8593	1142
SYAC_HUMAN	Alanine--tRNA ligase, cytoplasmic (EC 6.1.1.7) (Alanyl-tRNA synthetase) (AlaRS) (Renal carcinoma antigen NY-REN-42)	1203	891	1012	1275	1312	1019	1193	992	1139	972	1336	889	1293	930	1394	0	0	0	0	0
LTBP2_BOVIN	Latent-transforming growth factor beta-binding protein 2 (LTBP-2)	1201	1248	1089	1390	1465	1133	1236	1138	1492	1412	0	0	0	0	0	1878	1307	10309	7428	1141
TCPE_HUMAN	T-complex protein 1 subunit epsilon (TCP-1-epsilon) (CCT-epsilon)	1201	1327	1215	1486	1649	1555	1247	1627	1359	1566	1626	1345	1164	1399	1946	0	0	0	0	0
NOTC3_HUMAN	Neurogenic locus notch homolog protein 3 (Notch 3) [Cleaved into: Notch 3 extracellular truncation; Notch 3 intracellular domain]	1199	1260	1259	1520	1355	1373	1333	1569	1480	1564	1180	1293	1492	1085	1261	0	0	0	0	0
MATN4_HUMAN	Matrilin-4	1176	1223	1778	1636	1286	1338	836	1278	1257	1153	973	1009	918	975	721	0	0	0	0	0
VAT1_HUMAN	Synaptic vesicle membrane protein VAT-1 homolog (EC 1.-.-.-)	1173	1088	1045	1805	1403	1197	1205	1671	987	1650	1524	986	1539	949	1353	0	0	0	0	0
PUR2_BOVIN	Trifunctional purine biosynthetic protein adenosine-3 [Includes: Phosphoribosylamine--glycine ligase (EC 6.3.4.13) (Glycinamide ribonucleotide synthetase) (GARS) (Phosphoribosylglycinamide synthetase); Phosphoribosylformylglycinamidine cyclo-ligase (EC 6.3.3.1) (AIR synthase) (AIRS) (Phosphoribosyl-aminoimidazole synthetase); Phosphoribosylglycinamide formyltransferase (EC 2.1.2.2) (5'-phosphorib…	1172	1929	1937	1599	1297	1727	1209	1711	1230	1702	0	0	0	0	0	1381	1585	2169	5635	1982
NSF1C_BOVIN	NSFL1 cofactor p47 (p97 cofactor p47)	1171	824	1059	1172	1245	823	1168	814	1153	810	0	0	0	0	0	13999	13242	15253	11424	17106
OXSR1_HUMAN	Serine/threonine-protein kinase OSR1 (EC 2.7.11.1) (Oxidative stress-responsive 1 protein)	1171	1437	1411	1150	1019	1350	1297	957	1349	1293	1211	1104	960	1545	977	0	0	0	0	0
ACOHC_BOVIN	Cytoplasmic aconitate hydratase (Aconitase) (EC 4.2.1.3) (Citrate hydro-lyase) (Iron-responsive element-binding protein 1) (IRE-BP 1)	1168	1053	1343	1535	1321	2374	1107	2170	3396	1603	0	0	0	0	0	3797	1076	7897	38509	10586
ADK_HUMAN	Adenosine kinase (AK) (EC 2.7.1.20) (Adenosine 5'-phosphotransferase)	1166	1107	1272	1694	1350	1328	1362	1336	1134	1440	1297	1039	1492	1112	1300	0	0	0	0	0
MYPT1_HUMAN	Protein phosphatase 1 regulatory subunit 12A (Myosin phosphatase-targeting subunit 1) (Myosin phosphatase target subunit 1) (Protein phosphatase myosin-binding subunit)	1158	1155	1002	1390	1479	1342	1170	1089	1235	1149	1346	988	1379	922	1277	0	0	0	0	0
AEBP1_HUMAN	Adipocyte enhancer-binding protein 1 (AE-binding protein 1) (Aortic carboxypeptidase-like protein)	1149	989	967	1102	1564	1048	1295	1025	1248	1522	1572	866	1093	1234	1560	0	0	0	0	0
DMKN_BOVIN	Dermokine	1144	1368	1185	1549	1573	1747	1302	1104	1007	1321	0	0	0	0	0	4294	1339	7445	7039	10421
IGDC4_HUMAN	Immunoglobulin superfamily DCC subclass member 4 (Neighbor of punc e11) (Protein DDM36) (hDDM36)	1129	1782	1426	1213	1605	2363	1025	1123	990	917	1346	1378	1337	1105	1072	0	0	0	0	0
MYL9_HUMAN	Myosin regulatory light polypeptide 9 (20 kDa myosin light chain) (LC20) (MLC-2C) (Myosin RLC) (Myosin regulatory light chain 2, smooth muscle isoform) (Myosin regulatory light chain 9) (Myosin regulatory light chain MRLC1)	1125	1126	1191	2461	2018	2164	1009	2245	1204	1646	1427	776	1397	771	1404	0	0	0	0	0
PDC6I_HUMAN	Programmed cell death 6-interacting protein (PDCD6-interacting protein) (ALG-2-interacting protein 1) (ALG-2-interacting protein X) (Hp95)	1106	1275	1502	1667	1617	1928	1286	1493	1071	1488	1640	1155	1606	1339	1103	0	0	0	0	0
UN13D_HUMAN	Protein unc-13 homolog D (Munc13-4)	1105	1236	894	1294	932	1180	1098	1410	1769	1375	1201	1480	1267	1260	1560	0	0	0	0	0
ACSA_HUMAN	Acetyl-coenzyme A synthetase, cytoplasmic (EC 6.2.1.1) (Acetate--CoA ligase) (Acetyl-CoA synthetase) (ACS) (AceCS) (Acetyl-CoA synthetase 1) (AceCS1) (Acyl-CoA synthetase short-chain family member 2) (Acyl-activating enzyme) (Propionate--CoA ligase) (EC 6.2.1.17)	1090	1717	1480	1727	796	1378	1019	1637	1075	1727	658	1073	1570	1296	694	0	0	0	0	0
BIN1_HUMAN	Myc box-dependent-interacting protein 1 (Amphiphysin II) (Amphiphysin-like protein) (Box-dependent myc-interacting protein 1) (Bridging integrator 1)	1074	1205	2450	2319	1192	1763	979	1768	1458	1677	1232	1075	1904	1263	1146	0	0	0	0	0
PSDE_HUMAN	26S proteasome non-ATPase regulatory subunit 14 (EC 3.4.19.-) (26S proteasome regulatory subunit RPN11) (26S proteasome-associated PAD1 homolog 1)	1072	863	904	1509	1673	1656	1455	1414	942	1132	1584	868	1577	839	1531	0	0	0	0	0
CLAP1_HUMAN	CLIP-associating protein 1 (Cytoplasmic linker-associated protein 1) (Multiple asters homolog 1) (Protein Orbit homolog 1) (hOrbit1)	1065	887	1085	1265	1370	910	1046	1479	1021	1477	1255	891	1267	827	1202	0	0	0	0	0
MMP2_BOVIN	72 kDa type IV collagenase (EC 3.4.24.24) (72 kDa gelatinase) (Matrix metalloproteinase-2) (MMP-2) [Cleaved into: PEX]	1063	984	1142	2589	1938	1446	968	1767	958	1733	0	0	0	0	0	1627	871	1716	403	985
ENPL_BOVIN	Endoplasmin (94 kDa glucose-regulated protein) (GRP-94) (Heat shock protein 90 kDa beta member 1)	1060	1224	1754	2102	1391	1378	740	1349	728	1327	0	0	0	0	0	1067	819	1953	2085	1700
MATN2_HUMAN	Matrilin-2	1058	1005	1786	1797	1249	1675	850	1587	805	1504	1643	903	1643	861	746	0	0	0	0	0
EPS15_HUMAN	Epidermal growth factor receptor substrate 15 (Protein Eps15) (Protein AF-1p)	1053	1154	1460	962	1368	968	1624	1474	1449	1316	866	846	773	936	855	0	0	0	0	0
MTAP_BOVIN	S-methyl-5'-thioadenosine phosphorylase (EC 2.4.2.28) (5'-methylthioadenosine phosphorylase) (MTA phosphorylase) (MTAP) (MTAPase)	1051	1276	1239	1372	1482	1931	1081	1716	1091	1519	0	0	0	0	0	1603	949	6271	10046	2359
FKBP4_BOVIN	Peptidyl-prolyl cis-trans isomerase FKBP4 (PPIase FKBP4) (EC 5.2.1.8) (52 kDa FK506-binding protein) (52 kDa FKBP) (FKBP-52) (FK506-binding protein 4) (FKBP-4) (HSP-binding immunophilin) (HBI) (Immunophilin FKBP52) (Rotamase) [Cleaved into: Peptidyl-prolyl cis-trans isomerase FKBP4, N-terminally processed]	1049	1012	1005	1371	1439	1519	1002	1461	1011	1504	0	0	0	0	0	16505	2995	16195	15802	16441
CTHL5_BOVIN	Cathelicidin-5 (Antibacterial peptide BMAP-28) (Myeloid antibacterial peptide 28)	1044	1164	1562	1791	1577	1872	982	1470	1463	1684	0	0	0	0	0	3365	752	3898	6269	2496
MARCS_BOVIN	Myristoylated alanine-rich C-kinase substrate (MARCKS) (ACAMP-81)	1038	1028	1472	1526	1286	1567	1104	1388	960	1615	0	0	0	0	0	22913	13964	22974	24386	20177
ICAL_BOVIN	Calpastatin (Calpain inhibitor)	1029	1907	1232	1195	1090	1639	977	1730	1031	1825	0	0	0	0	0	8765	13695	11098	9348	1444
GSTP1_BOVIN	Glutathione S-transferase P (EC 2.5.1.18) (GST class-pi)	1026	930	1450	1442	1084	1872	1115	1498	1131	1514	0	0	0	0	0	1728	1014	14141	17264	13031
GPDA_BOVIN	Glycerol-3-phosphate dehydrogenase [NAD(+)], cytoplasmic (GPD-C) (GPDH-C) (EC 1.1.1.8)	1024	1496	1228	1535	1778	1599	876	1571	984	1147	0	0	0	0	0	2868	1528	10581	7835	22222
PTN11_HUMAN	Tyrosine-protein phosphatase non-receptor type 11 (EC 3.1.3.48) (Protein-tyrosine phosphatase 1D) (PTP-1D) (Protein-tyrosine phosphatase 2C) (PTP-2C) (SH-PTP2) (SHP-2) (Shp2) (SH-PTP3)	1019	1021	1140	1445	1408	1456	1220	1525	1054	1486	1322	982	1406	1122	1315	0	0	0	0	0
AL8A1_BOVIN	2-aminomuconic semialdehyde dehydrogenase (EC 1.2.1.32) (Aldehyde dehydrogenase family 8 member A1)	1016	1014	1183	1892	1491	1632	910	1539	975	1638	0	0	0	0	0	3773	1037	6760	16259	11077
AMPD2_HUMAN	AMP deaminase 2 (EC 3.5.4.6) (AMP deaminase isoform L)	1014	1135	851	1708	1316	804	1016	1880	978	1813	1680	1208	1701	1213	1618	0	0	0	0	0
K1C18_HUMAN	Keratin, type I cytoskeletal 18 (Cell proliferation-inducing gene 46 protein) (Cytokeratin-18) (CK-18) (Keratin-18) (K18)	1011	1672	1366	899	897	1475	1061	1199	1360	933	880	1316	894	1536	1011	0	0	0	0	0
HNRPU_HUMAN	Heterogeneous nuclear ribonucleoprotein U (hnRNP U) (GRIP120) (Nuclear p120 ribonucleoprotein) (Scaffold-attachment factor A) (SAF-A) (p120) (pp120)	1010	996	962	1636	1524	2075	1103	1998	1044	1899	1876	997	1924	1260	1904	0	0	0	0	0
COR1B_HUMAN	Coronin-1B (Coronin-2)	1003	1052	1577	1584	2009	1786	1525	1707	797	1489	1587	881	1616	797	788	0	0	0	0	0
PRDX3_HUMAN	Thioredoxin-dependent peroxide reductase, mitochondrial (EC 1.11.1.24) (Antioxidant protein 1) (AOP-1) (HBC189) (Peroxiredoxin III) (Prx-III) (Peroxiredoxin-3) (Protein MER5 homolog) (Thioredoxin-dependent peroxiredoxin 3)	1003	963	800	1740	1439	1008	894	963	836	1522	1508	829	1505	800	1459	0	0	0	0	0
GARS_HUMAN	Glycine--tRNA ligase (EC 6.1.1.14) (Diadenosine tetraphosphate synthetase) (Ap4A synthetase) (EC 2.7.7.-) (Glycyl-tRNA synthetase) (GlyRS) (Glycyl-tRNA synthetase 1)	986	979	809	1508	1521	1303	814	1193	826	1376	1767	984	1511	902	1656	0	0	0	0	0
TGFI1_BOVIN	Transforming growth factor beta-1-induced transcript 1 protein (Hydrogen peroxide-inducible clone 5 protein) (Hic-5)	977	2028	2003	1646	1091	1917	1142	2022	1205	2134	0	0	0	0	0	1576	1994	1348	4900	1770
QSPP_BOVIN	Queuosine salvage protein	955	1545	1285	1047	704	1441	2159	1426	962	1387	0	0	0	0	0	9842	2065	11813	11331	11189
CO9A2_BOVIN	Collagen alpha-2(IX) chain (Collagen type IX alpha 2 chain)	954	943	1319	1792	2003	1558	909	1445	947	1690	0	0	0	0	0	14178	911	21802	16553	8616
PBLD_BOVIN	Phenazine biosynthesis-like domain-containing protein (EC 5.1.-.-)	930	1066	1186	1672	1438	1313	868	1352	835	1422	0	0	0	0	0	20068	9106	30380	23773	13105
PDXK_BOVIN	Pyridoxal kinase (EC 2.7.1.35) (Pyridoxine kinase)	926	848	825	1391	1374	1314	920	1335	889	1647	0	0	0	0	0	2008	822	5494	4353	8911
CONG_BOVIN	Conglutinin	919	1314	1359	1380	1255	1278	2353	2148	1624	1390	0	0	0	0	0	1927	1732	8039	8695	5612
PK3CG_HUMAN	Phosphatidylinositol 4,5-bisphosphate 3-kinase catalytic subunit gamma isoform (PI3-kinase subunit gamma) (PI3K-gamma) (PI3Kgamma) (PtdIns-3-kinase subunit gamma) (EC 2.7.1.137) (EC 2.7.1.153) (EC 2.7.1.154) (Phosphatidylinositol 4,5-bisphosphate 3-kinase 110 kDa catalytic subunit gamma) (PtdIns-3-kinase subunit p110-gamma) (p110gamma) (Phosphoinositide-3-kinase catalytic gamma polypeptide) (Seri…	918	1260	1209	1554	1161	1688	856	1600	812	1516	1494	822	1494	1137	1356	0	0	0	0	0
MINP1_HUMAN	Multiple inositol polyphosphate phosphatase 1 (EC 3.1.3.62) (2,3-bisphosphoglycerate 3-phosphatase) (2,3-BPG phosphatase) (EC 3.1.3.80) (Inositol (1,3,4,5)-tetrakisphosphate 3-phosphatase) (Ins(1,3,4,5)P(4) 3-phosphatase)	904	924	878	1605	1484	1535	1095	1701	1047	1462	1676	960	1674	1202	1775	0	0	0	0	0
SEPT6_BOVIN	Septin-6	902	1122	1523	1221	1156	1422	1303	1358	1218	1284	0	0	0	0	0	1610	666	4874	6589	6202
TKT_HUMAN	Transketolase (TK) (EC 2.2.1.1)	901	902	1053	1704	1770	1474	878	1555	927	1640	1617	911	1682	782	1313	0	0	0	0	0
MK03_HUMAN	Mitogen-activated protein kinase 3 (MAP kinase 3) (MAPK 3) (EC 2.7.11.24) (ERT2) (Extracellular signal-regulated kinase 1) (ERK-1) (Insulin-stimulated MAP2 kinase) (MAP kinase isoform p44) (p44-MAPK) (Microtubule-associated protein 2 kinase) (p44-ERK1)	900	1004	973	1918	1783	1514	827	1502	818	1488	1596	901	1683	767	1433	0	0	0	0	0
NPTX1_HUMAN	Neuronal pentraxin-1 (NP1) (Neuronal pentraxin I) (NP-I)	897	966	926	1429	1529	1245	795	1203	764	1247	1363	843	1409	800	1289	0	0	0	0	0
GALK2_HUMAN	N-acetylgalactosamine kinase (EC 2.7.1.157) (GalNAc kinase) (Galactokinase 2)	882	802	732	1626	1397	1453	866	1533	760	1585	1700	910	1611	1069	1892	0	0	0	0	0
CO1A1_BOVIN	Collagen alpha-1(I) chain (Alpha-1 type I collagen)	879	739	1226	1357	1155	1216	2149	1737	964	1349	0	0	0	0	0	9632	3959	10905	7315	15421
TWF2_HUMAN	Twinfilin-2 (A6-related protein) (hA6RP) (Protein tyrosine kinase 9-like) (Twinfilin-1-like protein)	873	1129	1481	1476	1143	1263	874	1263	881	1260	1535	993	1467	1254	1604	0	0	0	0	0
GDIA_BOVIN	Rab GDP dissociation inhibitor alpha (Rab GDI alpha) (Guanosine diphosphate dissociation inhibitor 1) (GDI-1) (SMG p25A GDI)	872	2139	2106	2687	1166	3004	1420	1834	2569	1229	0	0	0	0	0	879	1642	833	2161	937
GFPT1_HUMAN	Glutamine--fructose-6-phosphate aminotransferase [isomerizing] 1 (EC 2.6.1.16) (D-fructose-6-phosphate amidotransferase 1) (Glutamine:fructose-6-phosphate amidotransferase 1) (GFAT 1) (GFAT1) (Hexosephosphate aminotransferase 1)	867	902	1417	1346	1356	1301	931	1344	952	1346	1350	900	1349	982	872	0	0	0	0	0
PNCB_BOVIN	Nicotinate phosphoribosyltransferase (NAPRTase) (EC 6.3.4.21) (Nicotinate phosphoribosyltransferase domain-containing protein 1)	866	953	948	1494	1722	1248	744	1317	785	1390	0	0	0	0	0	1468	786	7974	22148	757
HINT1_BOVIN	Adenosine 5'-monophosphoramidase HINT1 (EC 3.9.1.-) (17 kDa inhibitor of protein kinase C) (Desumoylating isopeptidase HINT1) (EC 3.4.22.-) (Histidine triad nucleotide-binding protein 1) (Protein kinase C inhibitor 1) (Protein kinase C-interacting protein 1) (PKCI-1)	860	1238	1183	1153	1123	1101	858	1464	1553	1153	0	0	0	0	0	1992	1346	15358	18144	932
FADD_BOVIN	FAS-associated death domain protein (FAS-associating death domain-containing protein)	859	874	1067	1497	1579	1387	853	1403	866	1390	0	0	0	0	0	1594	1038	13645	12496	4918
FBN1_BOVIN	Fibrillin-1 (MP340) [Cleaved into: Asprosin]	858	996	999	1410	1270	1340	848	1367	879	1408	0	0	0	0	0	1615	1372	12774	11804	1384
HNRPF_BOVIN	Heterogeneous nuclear ribonucleoprotein F (hnRNP F) [Cleaved into: Heterogeneous nuclear ribonucleoprotein F, N-terminally processed]	857	1002	1073	1657	1814	1567	829	1522	797	1473	0	0	0	0	0	2460	854	2873	3084	3669
PGS2_BOVIN	Decorin (Bone proteoglycan II) (PG-S2)	844	1045	1080	1249	1579	1386	844	1349	846	1305	0	0	0	0	0	8003	1981	16105	13765	9621
CSTN1_HUMAN	Calsyntenin-1 (Alcadein-alpha) (Alc-alpha) (Alzheimer-related cadherin-like protein) (Non-classical cadherin XB31alpha) [Cleaved into: Soluble Alc-alpha (SAlc-alpha); CTF1-alpha (C-terminal fragment 1-alpha)]	829	843	985	1492	1604	1799	903	1583	810	1485	1458	811	1486	991	1361	0	0	0	0	0
UMPS_BOVIN	Uridine 5'-monophosphate synthase (UMP synthase) [Includes: Orotate phosphoribosyltransferase (OPRTase) (EC 2.4.2.10); Orotidine 5'-phosphate decarboxylase (EC 4.1.1.23) (OMPdecase)]	815	874	1129	1381	1399	1150	867	1240	774	1418	0	0	0	0	0	8449	872	7632	14389	17333
STAB1_HUMAN	Stabilin-1 (Fasciclin, EGF-like, laminin-type EGF-like and link domain-containing scavenger receptor 1) (FEEL-1) (MS-1 antigen)	806	782	744	1551	1241	1374	814	1445	942	1517	1593	894	1510	1051	1773	0	0	0	0	0
IPO7_HUMAN	Importin-7 (Imp7) (Ran-binding protein 7) (RanBP7)	800	815	640	1279	1493	1459	792	1391	750	1338	1261	742	1277	744	1187	0	0	0	0	0
HOOK3_HUMAN	Protein Hook homolog 3 (h-hook3) (hHK3)	793	1092	966	1487	1894	1282	802	1353	846	1428	1597	1006	1518	966	1733	0	0	0	0	0
SRCRL_HUMAN	Soluble scavenger receptor cysteine-rich domain-containing protein SSC5D (Soluble scavenger protein with 5 SRCR domains) (SSc5D)	792	1146	1300	1353	1167	1308	800	1476	776	1433	1213	781	1248	985	1085	0	0	0	0	0
NIBA2_HUMAN	Protein Niban 2 (Meg-3) (Melanoma invasion by ERK) (MINERVA) (Niban-like protein 1) (Protein FAM129B)	785	786	911	1426	1322	1388	788	1418	807	1320	1332	823	1399	731	1196	0	0	0	0	0
PDIA1_BOVIN	Protein disulfide-isomerase (PDI) (EC 5.3.4.1) (Cellular thyroid hormone-binding protein) (Prolyl 4-hydroxylase subunit beta) (p55)	733	1339	1775	1261	1149	1354	687	992	1239	1110	0	0	0	0	0	3290	1149	4288	3989	4191
PDLI1_BOVIN	PDZ and LIM domain protein 1 (Elfin)	722	829	745	1248	1134	1318	851	1395	817	1331	0	0	0	0	0	1582	857	12747	5659	12385

## Sheet: GNP
		Medium1h_1	Medium1h_2	Medium1h_3	Medium1h_4	Medium1h_5	Medium24h_1	Medium24h_2	Medium24h_3	Medium24h_4	Medium24h_5	Plasma_1	Plasma_2	Plasma_3	Plasma_4	Plasma_5	Medium_1	Medium_2	Medium_3	Medium_4	Medium_5
Entry	Protein name	Pre1h	Pre1h	Pre1h	Pre1h	Pre1h	Pre24h	Pre24h	Pre24h	Pre24h	Pre24h	Plasma	Plasma	Plasma	Plasma	Plasma	Medium	Medium	Medium	Medium	Medium
ALBU_BOVIN	Albumin (BSA) (allergen Bos d 6)	84173576	92683320	88575600	79101520	63357548	75213200	124033888	75514448	71027728	97504888	0	0	0	0	0	7189674	7125209	8679548	9239183	11524812
A1AT_BOVIN	Alpha-1-antiproteinase (Alpha-1-antitrypsin) (Alpha-1-proteinase inhibitor) (Serpin A1)	59136824	69851488	69177704	61150756	56606812	71694760	90233232	86016944	71544104	77720296	0	0	0	0	0	7083430	5395227	10135706	8443345	12962338
FETUA_BOVIN	Alpha-2-HS-glycoprotein (Asialofetuin) (Fetuin-A)	45582100	47800960	54317536	41363980	40985428	48466680	48418108	53450684	50282620	48010556	0	0	0	0	0	7172076	4972876	6253563	3816285	7124648
ALBU_HUMAN	Albumin	35310828	15474580	13640393	14173507	9755534	5485783	7331724	12355808	4042729	7202226	79066440	76855488	78971992	56626776	202272240	0	0	0	0	0
VTNC_HUMAN	Vitronectin (VN) (S-protein) (Serum-spreading factor) (V75) [Cleaved into: Vitronectin V65 subunit; Vitronectin V10 subunit; Somatomedin-B]	17259176	13057299	9657484	20616922	21011370	6657863	8079776	5430811	5495937	7266052	221732048	206483200	187975200	172598400	146229216	0	0	0	0	0
A2MG_BOVIN	Alpha-2-macroglobulin (Alpha-2-M)	14445473	13960326	13402410	13778664	12315506	15359206	15743507	16475240	16008212	15742651	0	0	0	0	0	958044	1036908	2150896	1407004	1650215
HBA_BOVIN	Hemoglobin subunit alpha (Alpha-globin) (Hemoglobin alpha chain) [Cleaved into: Hemopressin]	12070157	10454771	7866194	9774026	8156516	13968862	15034130	19168368	16622506	20857114	0	0	0	0	0	2003156	2350637	2104991	3866611	2230038
APOA1_BOVIN	Apolipoprotein A-I (Apo-AI) (ApoA-I) (Apolipoprotein A1) [Cleaved into: Proapolipoprotein A-I (ProapoA-I); Truncated apolipoprotein A-I]	11424548	10845820	10804087	11062063	10747741	13156635	17595610	14703630	13337298	14747424	0	0	0	0	0	3136241	3995722	4086339	3723813	9781047
IGKC_HUMAN	Immunoglobulin kappa constant (Ig kappa chain C region) (Ig kappa chain C region AG) (Ig kappa chain C region CUM) (Ig kappa chain C region EU) (Ig kappa chain C region OU) (Ig kappa chain C region ROY) (Ig kappa chain C region TI)	3906104	2075937	1806070	2962785	2383244	1081752	1324223	1508810	897544	1412519	15179227	17952200	12895027	12208597	14899246	0	0	0	0	0
FETA_BOVIN	Alpha-fetoprotein (Alpha-1-fetoprotein) (Alpha-fetoglobulin)	3590112	3837697	3569108	3526282	2731479	2903631	5052443	3213873	3145183	4007477	0	0	0	0	0	187762	192985	290345	243384	347948
MP2K1_HUMAN	Dual specificity mitogen-activated protein kinase kinase 1 (MAP kinase kinase 1) (MAPKK 1) (MKK1) (EC 2.7.12.2) (ERK activator kinase 1) (MAPK/ERK kinase 1) (MEK 1)	3525857	11922548	2858025	2847656	2752837	2872071	6220048	2835522	5328993	2521635	61329	67096	64966	90805	47426	0	0	0	0	0
TRFE_BOVIN	Serotransferrin (Transferrin) (Beta-1 metal-binding globulin) (Siderophilin)	3367453	3913022	3963153	3387483	3074535	3501585	5540368	3794640	3438550	4017791	0	0	0	0	0	213402	174174	223074	201448	290473
FETUB_BOVIN	Fetuin-B	3290731	3130162	3192342	2791784	2786223	3386129	3347945	3233745	3801597	3190043	0	0	0	0	0	273688	229058	1203581	570492	1315674
IGHG1_HUMAN	Immunoglobulin heavy constant gamma 1 (Ig gamma-1 chain C region) (Ig gamma-1 chain C region EU) (Ig gamma-1 chain C region KOL) (Ig gamma-1 chain C region NIE)	3258198	1469264	1151746	1776520	1430626	502307	631413	1059408	367474	676064	5859633	6101589	6766835	7050781	14599721	0	0	0	0	0
APOA1_HUMAN	Apolipoprotein A-I (Apo-AI) (ApoA-I) (Apolipoprotein A1) [Cleaved into: Proapolipoprotein A-I (ProapoA-I); Truncated apolipoprotein A-I (Apolipoprotein A-I(1-242))]	3210656	1846231	1100088	2211638	2314122	682279	985374	1229225	773563	1167476	21294298	26697076	26685156	14397925	14370869	0	0	0	0	0
HEMO_BOVIN	Hemopexin	3184948	3024235	2799671	3150451	2363609	3168004	3095708	3246446	2986643	3501591	0	0	0	0	0	162605	178643	275159	208876	312007
HBBF_BOVIN	Hemoglobin fetal subunit beta (Beta-globin, fetal) (Hemoglobin beta chain, fetal) (Hemoglobin gamma chain)	3016870	2523727	2144441	2872090	2409920	3153474	4286037	3384640	3338656	5003573	0	0	0	0	0	7741395	3840921	9848426	8351331	10589029
ITIH2_HUMAN	Inter-alpha-trypsin inhibitor heavy chain H2 (ITI heavy chain H2) (ITI-HC2) (Inter-alpha-inhibitor heavy chain 2) (Inter-alpha-trypsin inhibitor complex component II) (Serum-derived hyaluronan-associated protein) (SHAP)	2817960	1634107	1320571	2029707	2123462	1132866	928816	1743165	1223448	1160290	2189984	5104129	4835797	4532359	4440621	0	0	0	0	0
TTHY_BOVIN	Transthyretin (Prealbumin)	2136772	2201459	1909526	1521090	1680878	1861240	2791579	2210940	1393650	2995277	0	0	0	0	0	57345	69908	328980	274338	245424
A1AG_BOVIN	Alpha-1-acid glycoprotein (Orosomucoid) (OMD)	2107816	2449233	2164713	1996646	2172257	2218921	2385214	2218830	2245967	2501235	0	0	0	0	0	64245	87247	84375	78460	110578
A2AP_BOVIN	Alpha-2-antiplasmin (Alpha-2-AP) (Alpha-2-plasmin inhibitor) (Alpha-2-PI) (Serpin F2)	2064251	2124569	1755070	1960980	1626298	2102001	2077490	2290966	2755910	2161809	0	0	0	0	0	371518	432540	610853	406399	513104
A1BG_BOVIN	Alpha-1B-glycoprotein (Alpha-1-B glycoprotein)	1906372	2101895	1945014	1902555	1607675	2014891	1906676	2168395	2350275	2053053	0	0	0	0	0	132671	107801	153324	159721	141108
KNG1_HUMAN	Kininogen-1 (Alpha-2-thiol proteinase inhibitor) (Fitzgerald factor) (High molecular weight kininogen) (HMWK) (Williams-Fitzgerald-Flaujeac factor) [Cleaved into: Kininogen-1 heavy chain; T-kinin (Ile-Ser-Bradykinin); Bradykinin (Kallidin I); Lysyl-bradykinin (Kallidin II); Kininogen-1 light chain; Low molecular weight growth-promoting factor]	1880186	1422918	1021645	1612075	1751125	705845	1237081	666709	423090	1151909	18652776	18934090	18516162	16024544	17261870	0	0	0	0	0
SPA37_BOVIN	Serpin A3-7	1766806	1937507	1891985	1831917	1836120	1879858	1899693	2113922	2498268	2164343	0	0	0	0	0	77996	59887	50151	51776	70703
APOE_BOVIN	Apolipoprotein E (Apo-E)	1589268	1071322	763203	1631348	1389293	595997	866449	726185	592368	973630	0	0	0	0	0	5859852	2628590	13238121	13763789	11147076
APOA2_BOVIN	Apolipoprotein A-II (Apo-AII) (ApoA-II) (Antimicrobial peptide BAMP-1) (Apolipoprotein A2) [Cleaved into: Proapolipoprotein A-II (ProapoA-II); Truncated apolipoprotein A-II (Apolipoprotein A-II(1-76))]	1516737	1384207	937168	1066325	858804	893622	945292	1125580	1052992	1186969	0	0	0	0	0	245378	293089	1246887	349720	830053
IGHM_HUMAN	Immunoglobulin heavy constant mu (Ig mu chain C region) (Ig mu chain C region BOT) (Ig mu chain C region GAL) (Ig mu chain C region OU)	1506158	932592	677111	1463978	1220720	514610	684431	512556	420283	775851	8340441	9600023	8720808	9058431	6369265	0	0	0	0	0
K2C1_HUMAN	Keratin, type II cytoskeletal 1 (67 kDa cytokeratin) (Cytokeratin-1) (CK-1) (Hair alpha protein) (Keratin-1) (K1) (Type-II keratin Kb1)	1110737	773216	1195876	906676	746699	314917	943790	250345	760496	550327	4197196	5325463	2963720	3671065	7065190	0	0	0	0	0
CO3_BOVIN	Complement C3 [Cleaved into: Complement C3 beta chain; Complement C3 alpha chain; C3a anaphylatoxin; C3-beta-c (C3bc); Acylation stimulating protein (ASP) (C3adesArg); Complement C3b alpha' chain; Complement C3c alpha' chain fragment 1; Complement C3dg fragment; Complement C3g fragment; Complement C3d fragment; Complement C3f fragment; Complement C3c alpha' chain fragment 2]	1087776	1309259	1200058	1305983	1248118	1324410	1287952	1486112	1543977	1441236	0	0	0	0	0	101946	104018	279306	186362	298653
APOE_HUMAN	Apolipoprotein E (Apo-E)	1061380	571121	403093	899960	661204	200217	470069	381478	380866	627489	7627361	7455060	7605411	5782698	4968319	0	0	0	0	0
VTDB_BOVIN	Vitamin D-binding protein (DBP) (VDB) (Gc-globulin) (Group-specific component)	1033101	1300100	1285012	1003129	914008	1151584	1461541	1129906	1127335	1311392	0	0	0	0	0	167064	180278	201109	192350	263884
ITIH3_BOVIN	Inter-alpha-trypsin inhibitor heavy chain H3 (ITI heavy chain H3) (ITI-HC3) (Inter-alpha-inhibitor heavy chain 3)	902097	1129828	1055710	970210	976077	1191648	1063384	1264927	1319977	1158067	0	0	0	0	0	43259	37454	96774	73841	116898
APOD_BOVIN	Apolipoprotein D (Apo-D) (ApoD)	797859	810388	592604	951458	545735	592936	1049236	669466	580830	1201207	0	0	0	0	0	91575	87121	129875	167749	443341
ANGT_BOVIN	Angiotensinogen (Serpin A8) [Cleaved into: Angiotensin-1 (Angiotensin 1-10) (Angiotensin I) (Ang I); Angiotensin-2 (Angiotensin 1-8) (Angiotensin II) (Ang II); Angiotensin-3 (Angiotensin 2-8) (Angiotensin III) (Ang III) (Des-Asp[1]-angiotensin II); Angiotensin-4 (Angiotensin 3-8) (Angiotensin IV) (Ang IV); Angiotensin 1-9; Angiotensin 1-7; Angiotensin 1-5; Angiotensin 1-4]	772260	809039	746134	767006	705487	870144	827260	957597	1113402	1084441	0	0	0	0	0	119402	88368	121109	96088	119663
AMBP_BOVIN	Protein AMBP [Cleaved into: Alpha-1-microglobulin (EC 1.6.2.-); Inter-alpha-trypsin inhibitor light chain (ITI-LC) (BI-14) (Bikunin) (Cumulus extracellular matrix-stabilizing factor) (ESF) (HI-30); Trypstatin]	756538	934745	840816	776649	584779	629270	865335	578633	640625	806580	0	0	0	0	0	58961	92453	179889	213875	586736
ITIH4_BOVIN	Inter-alpha-trypsin inhibitor heavy chain H4 (ITI heavy chain H4) (ITI-HC4) (Inter-alpha-inhibitor heavy chain 4)	738705	840386	771906	765232	687185	873353	793960	936034	984090	872053	0	0	0	0	0	119733	141225	507124	466434	533183
APOB_HUMAN	Apolipoprotein B-100 (Apo B-100) [Cleaved into: Apolipoprotein B-48 (Apo B-48)]	737305	363054	393808	1070870	645410	112188	122130	211232	287074	204014	8249956	10522381	7300821	10319703	7328724	0	0	0	0	0
APOA_HUMAN	Apolipoprotein(a) (Apo(a)) (Lp(a)) (EC 3.4.21.-)	689704	416567	365527	609264	315815	174224	242275	222403	220697	262662	8166481	8086384	6846176	6630948	10277291	0	0	0	0	0
ADIPO_BOVIN	Adiponectin (30 kDa adipocyte complement-related protein) (Adipocyte complement-related 30 kDa protein) (ACRP30) (Adipocyte, C1q and collagen domain-containing protein) (Adipose most abundant gene transcript 1 protein) (apM-1)	668186	779634	744112	715010	611238	776053	596416	834885	866544	720702	0	0	0	0	0	14179	9924	20927	15469	27990
IGHA1_HUMAN	Immunoglobulin heavy constant alpha 1 (Ig alpha-1 chain C region) (Ig alpha-1 chain C region BUR) (Ig alpha-1 chain C region TRO)	666024	376455	312527	428850	297134	145230	247304	189473	113825	201942	3143569	2482348	2634459	2487415	5385415	0	0	0	0	0
APOH_BOVIN	Beta-2-glycoprotein 1 (Apolipoprotein H) (Apo-H) (Beta-2-glycoprotein I) (B2GPI) (Beta(2)GPI)	663410	944611	921537	709661	487093	738868	1398207	559351	764210	1180985	0	0	0	0	0	258145	249674	191069	244070	545096
A1AT_HUMAN	Alpha-1-antitrypsin (Alpha-1 protease inhibitor) (Alpha-1-antiproteinase) (Serpin A1) [Cleaved into: Short peptide from AAT (SPAAT)]	646252	338712	203128	414578	338354	156766	207771	284432	163342	210422	1917399	1789888	2315501	1436422	2104813	0	0	0	0	0
IGHG2_HUMAN	Immunoglobulin heavy constant gamma 2 (Ig gamma-2 chain C region) (Ig gamma-2 chain C region DOT) (Ig gamma-2 chain C region TIL) (Ig gamma-2 chain C region ZIE)	641076	389966	268108	500762	393593	145152	234686	201189	145563	191808	2123411	3051787	2174585	2234652	3002372	0	0	0	0	0
F12AI_BOVIN	Factor XIIa inhibitor (XIIaINH)	597221	654261	648691	644671	595584	717407	591279	775060	832161	662316	0	0	0	0	0	69122	54115	117883	217626	80344
HBA_HUMAN	Hemoglobin subunit alpha (Alpha-globin) (Hemoglobin alpha chain) [Cleaved into: Hemopressin]	545612	580564	258014	891032	520317	483273	467094	395976	352036	532651	214659	1321647	768597	928352	923831	0	0	0	0	0
APOA2_HUMAN	Apolipoprotein A-II (Apo-AII) (ApoA-II) (Apolipoprotein A2) [Cleaved into: Proapolipoprotein A-II (ProapoA-II); Truncated apolipoprotein A-II (Apolipoprotein A-II(1-76))]	526505	349249	198910	431741	328324	96334	158735	165521	114735	168696	2719816	2989260	3044619	1079983	1846609	0	0	0	0	0
CLUS_HUMAN	Clusterin (Aging-associated gene 4 protein) (Apolipoprotein J) (Apo-J) (Complement cytolysis inhibitor) (CLI) (Complement-associated protein SP-40,40) (Ku70-binding protein 1) (NA1/NA2) (Sulfated glycoprotein 2) (SGP-2) (Testosterone-repressed prostate message 2) (TRPM-2) [Cleaved into: Clusterin beta chain (ApoJalpha) (Complement cytolysis inhibitor a chain); Clusterin alpha chain (ApoJbeta) (Co…	512033	350886	251191	490031	389640	143733	229744	196054	195336	314697	2640742	2619859	3193925	2364679	1755376	0	0	0	0	0
K1C9_HUMAN	Keratin, type I cytoskeletal 9 (Cytokeratin-9) (CK-9) (Keratin-9) (K9)	489946	264569	875328	314623	289656	127052	387691	105833	220953	167970	1153628	2133191	1418487	1048541	2681374	0	0	0	0	0
K1C10_HUMAN	Keratin, type I cytoskeletal 10 (Cytokeratin-10) (CK-10) (Keratin-10) (K10)	470562	516485	230956	391724	257042	124879	519503	103850	351144	251438	1063557	1771962	832150	1660011	2434389	0	0	0	0	0
FIBB_HUMAN	Fibrinogen beta chain [Cleaved into: Fibrinopeptide B; Fibrinogen beta chain]	467030	228530	168990	333292	280153	153369	229530	211938	182995	291440	2567316	2431008	3254452	2526989	2430374	0	0	0	0	0
PLMN_BOVIN	Plasminogen (EC 3.4.21.7) [Cleaved into: Plasmin heavy chain A; Activation peptide; Plasmin heavy chain A, short form; Plasmin light chain B]	454545	544558	542704	443523	379014	418167	795064	394125	400550	556998	0	0	0	0	0	27096	31839	57926	88761	206843
KNG1_BOVIN	Kininogen-1 (Kininogen I) (Thiol proteinase inhibitor) [Cleaved into: Kininogen-1 heavy chain; Bradykinin (Kallidin I); Lysyl-bradykinin (Kallidin II); Kininogen-1 light chain]	414152	548296	500920	396505	365908	326802	448623	385385	396532	463937	0	0	0	0	0	68074	189090	660504	175084	933160
APOC1_HUMAN	Apolipoprotein C-I (Apo-CI) (ApoC-I) (Apolipoprotein C1) [Cleaved into: Truncated apolipoprotein C-I]	399066	228195	122435	287508	245260	69014	71982	93733	78398	101033	2021071	2962927	3205100	2481088	1781962	0	0	0	0	0
APOC3_HUMAN	Apolipoprotein C-III (Apo-CIII) (ApoC-III) (Apolipoprotein C3)	383852	262735	145350	309807	363086	83152	116656	169723	84494	170343	2279014	3525298	2949262	1707669	2197499	0	0	0	0	0
FIBA_HUMAN	Fibrinogen alpha chain [Cleaved into: Fibrinopeptide A; Fibrinogen alpha chain]	370054	211469	154279	276161	265056	115499	167068	169349	136486	211352	2977658	2693370	3652786	2469975	2315720	0	0	0	0	0
CFAB_BOVIN	Complement factor B (EC 3.4.21.47) (C3/C5 convertase) (EC-VMFB) [Cleaved into: Complement factor B Ba fragment; Complement factor B Bb fragment]	369524	413609	449388	415539	348481	378031	400430	417936	473542	379020	0	0	0	0	0	11259	10749	16879	17349	25955
ANT3_BOVIN	Antithrombin-III (ATIII) (Serpin C1)	356358	347601	331781	375173	315743	352710	353334	397105	403537	394730	0	0	0	0	0	222439	51460	149114	191249	202678
FIBG_HUMAN	Fibrinogen gamma chain	355327	186900	123561	250327	201359	123410	192922	166122	150030	258845	1777027	1585412	2446971	1760761	1736998	0	0	0	0	0
KLKB1_BOVIN	Plasma kallikrein (EC 3.4.21.34) (Fletcher factor) (Kininogenin) (Plasma prekallikrein) [Cleaved into: Plasma kallikrein heavy chain; Plasma kallikrein light chain]	352266	245119	196445	389081	353007	139681	212120	134449	133620	210827	0	0	0	0	0	16587	17596	23012	19369	37783
SPA38_BOVIN	Serpin A3-8	324055	388482	391272	335355	298373	408288	340722	443299	464027	358916	0	0	0	0	0	41252	37858	31520	42932	31020
PEDF_BOVIN	Pigment epithelium-derived factor (PEDF) (Serpin F1)	322441	349792	411768	314997	295225	410313	343326	353772	398793	396320	0	0	0	0	0	9521	8138	26362	28762	46425
CO4_BOVIN	Complement C4 [Cleaved into: Complement C4 alpha chain; C4a anaphylatoxin; Complement C4 gamma chain]	307405	344321	328614	320110	288875	337950	376233	368321	423494	392182	0	0	0	0	0	32012	35606	158618	85915	78190
HBB_HUMAN	Hemoglobin subunit beta (Beta-globin) (Hemoglobin beta chain) [Cleaved into: LVV-hemorphin-7; Spinorphin]	305985	271482	143736	405275	312835	181556	245743	180869	133721	273027	839439	1222385	887234	771438	925419	0	0	0	0	0
CO9_BOVIN	Complement component C9	301255	303690	258969	305286	281870	262171	243077	242595	292468	293383	0	0	0	0	0	20724	18350	37673	36343	53732
FBLN1_HUMAN	Fibulin-1 (FIBL-1)	300482	252546	201829	276700	211001	175659	233376	217638	243357	251751	71646	48303	63318	57223	48248	0	0	0	0	0
APOM_HUMAN	Apolipoprotein M (Apo-M) (ApoM) (Protein G3a)	295467	172407	157450	204613	172932	119349	185620	173594	157046	207873	1175655	1302724	1517862	1106392	1281993	0	0	0	0	0
APOC3_BOVIN	Apolipoprotein C-III (Apo-CIII) (ApoC-III) (Apolipoprotein C3)	286389	216361	143000	287555	256950	93472	113320	120616	97043	135328	0	0	0	0	0	543416	457759	760710	1048224	775076
IGJ_HUMAN	Immunoglobulin J chain (Joining chain of multimeric IgA and IgM)	283673	197579	155596	299165	243113	90423	170475	103141	80371	163147	1748896	1334064	1606301	1312674	1630635	0	0	0	0	0
ITIH4_HUMAN	Inter-alpha-trypsin inhibitor heavy chain H4 (ITI heavy chain H4) (ITI-HC4) (Inter-alpha-inhibitor heavy chain 4) (Inter-alpha-trypsin inhibitor family heavy chain-related protein) (IHRP) (Plasma kallikrein sensitive glycoprotein 120) (Gp120) (PK-120) [Cleaved into: 70 kDa inter-alpha-trypsin inhibitor heavy chain H4; 35 kDa inter-alpha-trypsin inhibitor heavy chain H4]	278342	186306	128229	270748	277739	63025	74554	76429	58929	88681	2793300	2902037	2684484	2597114	1763056	0	0	0	0	0
HPT_HUMAN	Haptoglobin (Zonulin) [Cleaved into: Haptoglobin alpha chain; Haptoglobin beta chain]	266297	116794	88599	140001	107237	52722	50406	118402	46407	57635	610543	500844	641302	434682	1598576	0	0	0	0	0
HEP2_HUMAN	Heparin cofactor 2 (Heparin cofactor II) (HC-II) (Protease inhibitor leuserpin-2) (HLS2) (Serpin D1)	262662	132047	103464	207630	253430	70357	53835	119639	96977	57703	679682	667686	702181	834936	725993	0	0	0	0	0
K22E_HUMAN	Keratin, type II cytoskeletal 2 epidermal (Cytokeratin-2e) (CK-2e) (Epithelial keratin-2e) (Keratin-2 epidermis) (Keratin-2e) (K2e) (Type-II keratin Kb2)	254667	248293	146903	325370	165965	104976	184908	63754	256485	124159	666122	967828	616945	1887717	1591326	0	0	0	0	0
TRFE_HUMAN	Serotransferrin (Transferrin) (Beta-1 metal-binding globulin) (Siderophilin)	253827	95779	89463	106201	70037	32401	39222	83565	28510	40453	514947	414991	503350	378888	1176927	0	0	0	0	0
CO9_HUMAN	Complement component C9 [Cleaved into: Complement component C9a; Complement component C9b]	243684	140918	124100	217223	250456	81798	112643	111809	79746	115662	1498130	1560019	1720316	1485555	1298557	0	0	0	0	0
AFAM_BOVIN	Afamin (Alpha-albumin)	243059	278555	255256	232169	192105	230311	276279	231651	235028	252357	0	0	0	0	0	31834	27410	30275	21774	27917
PROS_BOVIN	Vitamin K-dependent protein S	226899	229429	188279	272537	241257	316145	238859	254281	284786	278973	0	0	0	0	0	24242	29399	59825	51600	58215
HEMO_HUMAN	Hemopexin (Beta-1B-glycoprotein)	225089	94377	82742	112920	93279	35729	34920	102407	30786	42104	478502	514796	459847	633474	708386	0	0	0	0	0
A2MG_HUMAN	Alpha-2-macroglobulin (Alpha-2-M) (C3 and PZP-like alpha-2-macroglobulin domain-containing protein 5)	220785	91883	76762	127838	118014	37701	35533	103933	43291	45346	496255	459855	528636	490655	692554	0	0	0	0	0
CO3_HUMAN	Complement C3 (C3 and PZP-like alpha-2-macroglobulin domain-containing protein 1) [Cleaved into: Complement C3 beta chain; C3-beta-c (C3bc); Complement C3 alpha chain; C3a anaphylatoxin; Acylation stimulating protein (ASP) (C3adesArg); Complement C3b alpha' chain; Complement C3c alpha' chain fragment 1; Complement C3dg fragment; Complement C3g fragment; Complement C3d fragment; Complement C3f fra…	218246	123543	93061	184667	196117	58049	65563	75416	62870	62534	1169291	1410325	1284265	1348308	1004716	0	0	0	0	0
APOA4_HUMAN	Apolipoprotein A-IV (Apo-AIV) (ApoA-IV) (Apolipoprotein A4)	212420	130961	85066	185666	166269	42166	62088	75133	54904	80858	1142891	1102235	1430290	835210	808030	0	0	0	0	0
RET4_BOVIN	Retinol-binding protein 4 (Plasma retinol-binding protein) (PRBP) (RBP)	207251	175052	161999	175183	182327	161116	196241	173549	189950	202384	0	0	0	0	0	8376	7953	9317	10974	15914
THBG_BOVIN	Thyroxine-binding globulin (Serpin A7) (T4-binding globulin)	202450	256728	249759	217968	170232	234456	233780	263669	341203	237165	0	0	0	0	0	10655	10352	14245	12760	17344
HRG_HUMAN	Histidine-rich glycoprotein (Histidine-proline-rich glycoprotein) (HPRG)	201812	129151	110108	236307	229405	113974	125743	91989	102221	123272	959060	956156	786363	964732	803682	0	0	0	0	0
KV401_HUMAN	Immunoglobulin kappa variable 4-1 (Ig kappa chain V-IV region B17) (Ig kappa chain V-IV region JI) (Ig kappa chain V-IV region Len) (Ig kappa chain V-IV region STH)	196707	132694	97516	214663	174819	61811	66931	80824	53361	84432	811416	676094	876025	916764	621075	0	0	0	0	0
G3P_BOVIN	Glyceraldehyde-3-phosphate dehydrogenase (GAPDH) (EC 1.2.1.12) (Peptidyl-cysteine S-nitrosylase GAPDH) (EC 2.6.99.-)	193329	132209	103206	125009	150575	202775	230337	244406	214463	281668	0	0	0	0	0	83623	60783	49372	63254	97744
TSP1_BOVIN	Thrombospondin-1 (Glycoprotein G)	187814	132664	109262	207729	198343	57539	63296	60799	67469	83296	0	0	0	0	0	88586	106755	1254078	842642	971613
CLUS_BOVIN	Clusterin (Glycoprotein III) (GpIII) [Cleaved into: Clusterin beta chain; Clusterin alpha chain]	187211	171442	164740	192476	180565	242991	273797	259641	268175	340948	0	0	0	0	0	55369	36540	56838	58923	113314
CO5_HUMAN	Complement C5 (C3 and PZP-like alpha-2-macroglobulin domain-containing protein 4) [Cleaved into: Complement C5 beta chain; Complement C5 alpha chain; C5a anaphylatoxin; Complement C5 alpha' chain]	186905	102087	85967	183333	172787	85598	93113	87248	93188	107421	721860	686372	745954	859359	601774	0	0	0	0	0
APOC2_HUMAN	Apolipoprotein C-II (Apo-CII) (ApoC-II) (Apolipoprotein C2) [Cleaved into: Proapolipoprotein C-II (ProapoC-II)]	176116	89229	59437	138940	91652	32462	50798	48313	36351	53046	1521300	1634398	1797555	752105	1046310	0	0	0	0	0
AACT_HUMAN	Alpha-1-antichymotrypsin (ACT) (Cell growth-inhibiting gene 24/25 protein) (Serpin A3) [Cleaved into: Alpha-1-antichymotrypsin His-Pro-less]	175900	74951	44538	85140	66682	32915	26380	64919	24539	33467	288034	330331	352465	246848	432063	0	0	0	0	0
HBB_BOVIN	Hemoglobin subunit beta (Beta-globin) (Hemoglobin beta chain) [Cleaved into: Spinorphin]	171954	182158	147069	161375	146872	177537	193761	219365	210729	221833	0	0	0	0	0	37967	13984	266056	130692	356508
FINC_BOVIN	Fibronectin (FN) [Cleaved into: Anastellin]	169009	142073	115774	152546	145038	90915	100610	108101	113078	119481	0	0	0	0	0	38711	31368	318375	211676	214682
TTHY_HUMAN	Transthyretin (ATTR) (Prealbumin) (TBPA)	166094	71838	40204	79254	70308	33411	45618	61738	31869	55904	297661	426995	417574	326998	374030	0	0	0	0	0
APOD_HUMAN	Apolipoprotein D (Apo-D) (ApoD)	161572	86468	42326	93326	69965	25245	68927	35611	29027	72865	1127308	932676	992912	816405	865851	0	0	0	0	0
LUM_BOVIN	Lumican (Corneal keratan sulfate proteoglycan 37B core protein) (Keratan sulfate proteoglycan) (KSPG)	160692	172852	171333	156218	132428	170883	135693	176160	214989	161989	0	0	0	0	0	11944	7903	12300	9722	20924
THRB_BOVIN	Prothrombin (EC 3.4.21.5) (Coagulation factor II) [Cleaved into: Activation peptide fragment 1; Activation peptide fragment 2; Thrombin light chain; Thrombin heavy chain]	158426	155626	127715	185250	140863	142484	207343	136644	139616	214306	0	0	0	0	0	305730	203646	841550	694796	895792
TBB1_HUMAN	Tubulin beta-1 chain	146868	119938	91671	174058	156659	104939	176180	150137	135686	177891	22573	26236	30998	32909	22043	0	0	0	0	0
PROZ_BOVIN	Vitamin K-dependent protein Z	138516	84565	61718	158235	147377	127976	145294	152498	124609	145670	0	0	0	0	0	17962	40425	258693	216823	236686
KNG2_BOVIN	Kininogen-2 (Kininogen II) (Thiol proteinase inhibitor) [Cleaved into: Kininogen-2 heavy chain; Bradykinin (Kallidin I); Lysyl-bradykinin (Kallidin II); Kininogen-2 light chain]	135389	146253	161562	148113	145073	145843	148284	158522	197454	163283	0	0	0	0	0	6695	5861	44342	4568	57357
VNN1_BOVIN	Pantetheinase (EC 3.5.1.92) (Pantetheine hydrolase) (Vascular non-inflammatory molecule 1) (Vanin-1)	134821	151174	158495	136700	109652	161503	133950	147056	171909	130623	0	0	0	0	0	4171	3488	3813	3730	6251
APOC4_HUMAN	Apolipoprotein C-IV (Apo-CIV) (ApoC-IV) (Apolipoprotein C4)	130999	81853	57014	123283	107338	31133	33136	39281	37779	48516	1392244	1303361	1652202	1397111	962755	0	0	0	0	0
HRG_BOVIN	Histidine-rich glycoprotein (Histidine-proline-rich glycoprotein) (HPRG)	129978	102072	88235	126347	111106	530530	768936	634705	491203	1008730	0	0	0	0	0	46810	63972	97368	105467	115325
K1C13_HUMAN	Keratin, type I cytoskeletal 13 (Cytokeratin-13) (CK-13) (Keratin-13) (K13)	129367	133946	143482	128212	931251	65214	120483	129946	92602	163434	258109	131995	151997	628120	359556	0	0	0	0	0
FA5_BOVIN	Coagulation factor V (Activated protein C cofactor) [Cleaved into: Coagulation factor V heavy chain; Coagulation factor V light chain]	123664	108321	99706	139366	124841	312335	301302	338825	342368	413021	0	0	0	0	0	41787	42810	93746	81738	99175
KV320_HUMAN	Immunoglobulin kappa variable 3-20 (Ig kappa chain V-III region B6) (Ig kappa chain V-III region GOL) (Ig kappa chain V-III region HAH) (Ig kappa chain V-III region HIC) (Ig kappa chain V-III region IARC/BL41) (Ig kappa chain V-III region NG9) (Ig kappa chain V-III region SIE) (Ig kappa chain V-III region Ti) (Ig kappa chain V-III region WOL)	122908	69115	50103	92454	58505	22905	35789	48448	23306	42191	412869	363829	441918	447291	304216	0	0	0	0	0
A1AG1_HUMAN	Alpha-1-acid glycoprotein 1 (AGP 1) (Orosomucoid-1) (OMD 1)	122724	45355	36635	47202	38097	20533	15991	55468	14636	20499	120113	136051	147349	84003	304600	0	0	0	0	0
CERU_HUMAN	Ceruloplasmin (EC 1.16.3.1) (Ferroxidase)	117743	49105	39254	55554	48025	22752	22195	63754	21414	27251	128244	148997	186486	159066	301968	0	0	0	0	0
ITIH1_BOVIN	Inter-alpha-trypsin inhibitor heavy chain H1 (ITI heavy chain H1) (ITI-HC1) (Inter-alpha-inhibitor heavy chain 1)	117496	138487	137989	134021	122344	148044	110030	154805	176243	114358	0	0	0	0	0	8200	8382	13460	12028	12713
SAA4_HUMAN	Serum amyloid A-4 protein (Constitutively expressed serum amyloid A protein) (C-SAA)	113500	72848	54425	100232	79105	24008	32325	52960	37739	52813	760617	703069	808379	767577	549939	0	0	0	0	0
MYH9_HUMAN	Myosin-9 (Cellular myosin heavy chain, type A) (Myosin heavy chain 9) (Myosin heavy chain, non-muscle IIa) (Non-muscle myosin heavy chain A) (NMMHC-A) (Non-muscle myosin heavy chain IIa) (NMMHC II-a) (NMMHC-IIA)	111759	70620	56376	139970	119376	59019	42285	54934	62040	58798	17977	17175	15797	17758	13770	0	0	0	0	0
PON1_HUMAN	Serum paraoxonase/arylesterase 1 (PON 1) (EC 3.1.1.2) (EC 3.1.1.81) (EC 3.1.8.1) (Aromatic esterase 1) (A-esterase 1) (K-45) (Serum aryldialkylphosphatase 1)	111267	58858	47182	90581	58033	20363	32030	45917	39930	45349	420794	521412	487715	466485	360063	0	0	0	0	0
HV307_HUMAN	Immunoglobulin heavy variable 3-7 (Ig heavy chain V-III region GAL) (Ig heavy chain V-III region GAR) (Ig heavy chain V-III region JON)	111129	56566	44854	79703	74585	19921	25515	44215	23862	33102	392357	350010	413018	385170	337086	0	0	0	0	0
IGHG4_HUMAN	Immunoglobulin heavy constant gamma 4 (Ig gamma-4 chain C region)	110510	47884	36695	56391	31013	21384	15805	43739	19404	23064	285284	251406	272498	189774	478201	0	0	0	0	0
FA9_BOVIN	Coagulation factor IX (EC 3.4.21.22) (Christmas factor) [Cleaved into: Coagulation factor IXa light chain; Coagulation factor IXa heavy chain]	107778	69064	38394	84200	86750	144322	190787	124141	127804	230006	0	0	0	0	0	18415	16437	73905	43202	114099
SPP24_BOVIN	Secreted phosphoprotein 24 (Spp-24) (Secreted phosphoprotein 2)	104889	66179	34578	104035	91801	36512	62892	38812	36273	51101	0	0	0	0	0	34113	35837	574984	304646	562835
FIBA_BOVIN	Fibrinogen alpha chain [Cleaved into: Fibrinopeptide A; Fibrinogen alpha chain]	103647	94228	89916	105925	94251	103137	120054	114355	118860	132723	0	0	0	0	0	33891	45890	508451	397018	481540
IC1_HUMAN	Plasma protease C1 inhibitor (C1 Inh) (C1Inh) (C1 esterase inhibitor) (C1-inhibiting factor) (Serpin G1)	103202	43447	29658	51059	38766	19127	21005	44147	19395	24513	246190	281069	333817	291825	339036	0	0	0	0	0
GELS_BOVIN	Gelsolin (Actin-depolymerizing factor) (ADF) (Brevin)	102675	100595	93159	100810	95501	110964	96088	126967	143611	118266	0	0	0	0	0	269598	128710	235681	484605	244964
GELS_HUMAN	Gelsolin (AGEL) (Actin-depolymerizing factor) (ADF) (Brevin)	102300	60661	40216	89524	98164	32430	32208	38233	34960	38440	458437	510581	488994	447478	362454	0	0	0	0	0
CHIA_BOVIN	Acidic mammalian chitinase (AMCase) (EC 3.2.1.14) (Chitin-binding protein b04) (CBPb04)	101662	98187	106698	89947	80783	114753	99840	138961	120548	111817	0	0	0	0	0	2521	2940	4298	3302	4284
FA11_HUMAN	Coagulation factor XI (FXI) (EC 3.4.21.27) (Plasma thromboplastin antecedent) (PTA) [Cleaved into: Coagulation factor XIa heavy chain; Coagulation factor XIa light chain]	101227	73256	64341	149538	172439	34915	32026	32029	34471	31749	1752324	1567337	869599	1743180	1527523	0	0	0	0	0
FA11_BOVIN	Coagulation factor XI (FXI) (EC 3.4.21.27) (Plasma thromboplastin antecedent) (PTA) [Cleaved into: Coagulation factor XIa heavy chain; Coagulation factor XIa light chain]	100164	70812	51323	103504	103108	30056	45005	31928	28881	50790	0	0	0	0	0	2698	2456	2786	2630	3070
HPTR_HUMAN	Haptoglobin-related protein	93735	60275	39904	78749	67143	29204	46590	26906	29142	44751	429609	425632	449789	460436	381405	0	0	0	0	0
TLN1_HUMAN	Talin-1	91475	83399	56696	102824	84890	102118	144924	117480	131034	187754	49504	51142	53336	49071	42054	0	0	0	0	0
TSP1_HUMAN	Thrombospondin-1 (Glycoprotein G)	85552	62400	57904	92713	103728	25685	40002	29056	28060	36349	22195	21138	31357	27957	37408	0	0	0	0	0
IGHA2_HUMAN	Immunoglobulin heavy constant alpha 2 (Ig alpha-2 chain C region) (Ig alpha-2 chain C region BUT) (Ig alpha-2 chain C region LAN)	83996	31685	34463	41565	37696	27248	18900	27279	15497	28617	337563	345662	357689	355075	542801	0	0	0	0	0
FINC_HUMAN	Fibronectin (FN) (Cold-insoluble globulin) (CIG) [Cleaved into: Anastellin; Ugl-Y1; Ugl-Y2; Ugl-Y3]	83652	13770	26129	28996	14573	7025	10122	9560	11627	15305	51526	61453	79116	57442	77739	0	0	0	0	0
B2MG_BOVIN	Beta-2-microglobulin (Lactollin)	82335	95758	87938	86375	84602	91084	78027	83511	90118	96759	0	0	0	0	0	691	916	54965	23981	56271
S10AC_BOVIN	Protein S100-A12 (Calcium-binding protein in amniotic fluid 1) (CAAF1) (Calgranulin-C) (CAGC) (Cornea-associated antigen) (CO-AG) (Extracellular newly identified RAGE-binding protein) (EN-RAGE) (RAGE-binding protein) (S100 calcium-binding protein A12)	81800	32495	33186	81101	94518	30506	51981	42678	29078	70279	0	0	0	0	0	2608	2389	25321	14875	30803
PLTP_HUMAN	Phospholipid transfer protein (Lipid transfer protein II)	80894	51736	36114	73882	52183	19629	27121	36204	33008	43115	287180	247459	305469	260727	205315	0	0	0	0	0
APOC4_BOVIN	Apolipoprotein C-IV (Apo-CIV) (ApoC-IV) (Apolipoprotein C4)	80874	61074	48149	83471	77740	12536	16572	17218	10494	22489	0	0	0	0	0	4811	7907	12148	16193	11570
HV374_HUMAN	Immunoglobulin heavy variable 3-74	78667	44374	33100	59891	63191	29127	36263	32366	24868	28062	267107	325089	348799	335587	246421	0	0	0	0	0
PROF1_BOVIN	Profilin-1 (Profilin I)	77887	77209	54789	76395	67754	88488	106472	110343	115621	133910	0	0	0	0	0	11728	11324	43960	14410	28629
FLNA_HUMAN	Filamin-A (FLN-A) (Actin-binding protein 280) (ABP-280) (Alpha-filamin) (Endothelial actin-binding protein) (Filamin-1) (Non-muscle filamin)	76721	66142	53999	89435	78749	73195	87076	75781	74714	114318	101002	107139	108074	112891	75862	0	0	0	0	0
LBP_HUMAN	Lipopolysaccharide-binding protein (LBP)	74111	44783	36536	83367	83815	16315	14382	18826	23660	16419	382019	441735	372566	450331	309855	0	0	0	0	0
CO6A1_HUMAN	Collagen alpha-1(VI) chain	73931	80022	73522	70324	71685	76443	74460	78437	81050	80117	7839	6986	8627	8345	5148	0	0	0	0	0
KPYM_HUMAN	Pyruvate kinase PKM (EC 2.7.1.40) (Cytosolic thyroid hormone-binding protein) (CTHBP) (Opa-interacting protein 3) (OIP-3) (Pyruvate kinase 2/3) (Pyruvate kinase muscle isozyme) (Threonine-protein kinase PKM2) (EC 2.7.11.1) (Thyroid hormone-binding protein 1) (THBP1) (Tumor M2-PK) (Tyrosine-protein kinase PKM2) (EC 2.7.10.2) (p58)	73312	66621	52425	83260	81374	87921	98731	94204	102318	118146	51431	55410	49398	66173	49161	0	0	0	0	0
C4BPA_BOVIN	C4b-binding protein alpha chain (C4bp)	72743	73412	57889	82172	55504	63148	111472	56594	63002	127248	0	0	0	0	0	10401	11553	26097	24098	28509
PRDX6_BOVIN	Peroxiredoxin-6 (EC 1.11.1.27) (1-Cys peroxiredoxin) (1-Cys PRX) (Acidic calcium-independent phospholipase A2) (aiPLA2) (EC 3.1.1.4) (Antioxidant protein 2) (Ciliary body glutathione peroxidase) (Glutathione-dependent peroxiredoxin) (Lysophosphatidylcholine acyltransferase 5) (LPC acyltransferase 5) (LPCAT-5) (Lyso-PC acyltransferase 5) (EC 2.3.1.23) (Non-selenium glutathione peroxidase) (NSGPx) …	71715	69249	58451	62279	41467	58171	68856	87236	65878	73654	0	0	0	0	0	11949	11448	22226	25428	66712
FETUA_HUMAN	Alpha-2-HS-glycoprotein (Alpha-2-Z-globulin) (Ba-alpha-2-glycoprotein) (Fetuin-A) [Cleaved into: Alpha-2-HS-glycoprotein chain A; Alpha-2-HS-glycoprotein chain B]	71545	30750	21622	36612	29245	7842	16158	23116	10864	17517	182061	159686	247755	156536	242840	0	0	0	0	0
IPSP_BOVIN	Plasma serine protease inhibitor (Protein C inhibitor) (PCI) (Serpin A5)	69388	93546	96743	93379	75554	102389	67995	99143	118249	81719	0	0	0	0	0	37186	32315	408716	151717	247031
HP20_BOVIN	Protein HP-20 homolog	69309	84146	93949	75768	61728	80981	77361	80752	85379	83812	0	0	0	0	0	6165	5942	7581	5860	12414
TETN_BOVIN	Tetranectin (TN) (C-type lectin domain family 3 member B)	66669	71478	59273	64334	56990	58281	66812	57180	54212	69780	0	0	0	0	0	12980	14493	162359	15285	132614
FIBB_BOVIN	Fibrinogen beta chain [Cleaved into: Fibrinopeptide B; Fibrinogen beta chain]	64190	56193	48159	67197	60741	60556	77018	73283	68836	95479	0	0	0	0	0	22957	27478	304853	159976	267646
CD5L_HUMAN	CD5 antigen-like (Apoptosis inhibitor expressed by macrophages) (hAIM) (CT-2) (IgM-associated peptide) (SP-alpha)	60730	41946	39183	71001	54959	21341	39633	20924	19648	23876	615849	546804	452207	510921	1235321	0	0	0	0	0
F13A_BOVIN	Coagulation factor XIII A chain (Coagulation factor XIIIa) (EC 2.3.2.13) (Protein-glutamine gamma-glutamyltransferase A chain) (Transglutaminase A chain)	59639	40091	43943	76148	67437	83145	56678	66484	55386	68504	0	0	0	0	0	25700	25631	39623	25130	24590
APMAP_HUMAN	Adipocyte plasma membrane-associated protein (Protein BSCv)	58836	84615	22560	61330	49197	47337	23689	25500	21065	39257	212664	72211	196865	85582	110178	0	0	0	0	0
SEPP1_HUMAN	Selenoprotein P (SeP)	58648	38886	30575	57839	53391	20460	26455	21712	17259	31899	247156	201587	242547	229445	169059	0	0	0	0	0
CBG_BOVIN	Corticosteroid-binding globulin (CBG) (Serpin A6) (Transcortin)	58635	57588	66828	61518	49864	67543	58523	68229	77708	61416	0	0	0	0	0	4315	4917	7749	5979	6959
S10A9_BOVIN	Protein S100-A9 (BEE22) (Calgranulin-B) (Neutrophil cytosolic 23 kDa protein) (p23) (S100 calcium-binding protein A9)	56551	29136	19385	57965	62203	28242	42179	29889	21312	62702	0	0	0	0	0	5962	4482	22196	10185	5219
VTDB_HUMAN	Vitamin D-binding protein (DBP) (VDB) (Gc protein-derived macrophage activating factor) (Gc-MAF) (GcMAF) (Gc-globulin) (Group-specific component) (Gc) (Vitamin D-binding protein-macrophage activating factor) (DBP-maf)	55312	22893	18461	29942	22582	9885	9380	27519	9622	12919	116840	104800	137733	85020	221573	0	0	0	0	0
B3AT_HUMAN	Band 3 anion transport protein (Anion exchange protein 1) (AE 1) (Anion exchanger 1) (Solute carrier family 4 member 1) (CD antigen CD233)	55040	26395	27163	75996	57172	33830	30568	38487	30743	47527	254625	202212	207257	280426	166485	0	0	0	0	0
ZA2G_HUMAN	Zinc-alpha-2-glycoprotein (Zn-alpha-2-GP) (Zn-alpha-2-glycoprotein)	54634	19557	17578	21650	13887	9031	8642	21955	9159	12171	91054	72296	98787	56970	167616	0	0	0	0	0
IGHG3_HUMAN	Immunoglobulin heavy constant gamma 3 (HDC) (Heavy chain disease protein) (Ig gamma-3 chain C region)	53595	34047	24367	31862	21542	7644	13531	13381	7045	12688	269123	173184	187123	214896	399312	0	0	0	0	0
FRIL_BOVIN	Ferritin light chain (Ferritin L subunit)	53165	52833	32343	61872	34597	30245	44243	43676	41268	66788	0	0	0	0	0	4944	5037	5771	7154	11108
APOH_HUMAN	Beta-2-glycoprotein 1 (APC inhibitor) (Activated protein C-binding protein) (Anticardiolipin cofactor) (Apolipoprotein H) (Apo-H) (Beta-2-glycoprotein I) (B2GPI) (Beta(2)GPI)	50862	25925	25732	25539	19203	11477	15569	14585	13329	11567	692976	574611	574006	572489	1090608	0	0	0	0	0
ANGT_HUMAN	Angiotensinogen (Serpin A8) [Cleaved into: Angiotensin-1 (Angiotensin 1-10) (Angiotensin I) (Ang I); Angiotensin-2 (Angiotensin 1-8) (Angiotensin II) (Ang II); Angiotensin-3 (Angiotensin 2-8) (Angiotensin III) (Ang III) (Des-Asp[1]-angiotensin II); Angiotensin-4 (Angiotensin 3-8) (Angiotensin IV) (Ang IV); Angiotensin 1-9; Angiotensin 1-7; Angiotensin 1-5; Angiotensin 1-4]	49701	21183	14340	29311	25279	10122	17285	21104	12451	15013	99549	94057	119750	94673	97272	0	0	0	0	0
FIBG_BOVIN	Fibrinogen gamma-B chain (Gamma')	48741	39468	36691	48268	43482	45811	52468	52114	50820	71139	0	0	0	0	0	9578	11205	61729	39319	78013
CO4A_HUMAN	Complement C4-A (Acidic complement C4) (C3 and PZP-like alpha-2-macroglobulin domain-containing protein 2) [Cleaved into: Complement C4 beta chain; Complement C4-A alpha chain; C4a anaphylatoxin; C4b-A; C4d-A; Complement C4 gamma chain]	48675	27661	18467	43152	44173	11873	15998	17574	12450	13043	247889	254777	238002	277773	178192	0	0	0	0	0
QSOX1_HUMAN	Sulfhydryl oxidase 1 (hQSOX) (EC 1.8.3.2) (Quiescin Q6)	48580	37490	32194	65541	51540	23991	34964	27812	37022	28923	61762	40782	52338	51846	78095	0	0	0	0	0
A1BG_HUMAN	Alpha-1B-glycoprotein (Alpha-1-B glycoprotein)	48460	15663	12821	17988	16584	7524	6325	19677	5551	8045	87100	66874	101011	55718	170694	0	0	0	0	0
APOC2_BOVIN	Apolipoprotein C-II (Apo-CII) (ApoC-II) (Apolipoprotein C2) [Cleaved into: Proapolipoprotein C-II (ProapoC-II)]	45192	8666	75145	33680	52200	8942	13971	38232	23161	100340	0	0	0	0	0	5144	6450	14422	15551	19603
C1QB_HUMAN	Complement C1q subcomponent subunit B	44887	27829	18427	36943	30568	7541	9745	8020	12023	10170	165450	246889	219564	335481	206919	0	0	0	0	0
A2AP_HUMAN	Alpha-2-antiplasmin (Alpha-2-AP) (Alpha-2-plasmin inhibitor) (Alpha-2-PI) (Serpin F2)	44418	20901	18919	33028	28668	10829	18125	16283	15577	15777	240490	280692	303444	243929	207260	0	0	0	0	0
LDHB_BOVIN	L-lactate dehydrogenase B chain (LDH-B) (EC 1.1.1.27)	43042	27895	28248	31411	33729	36996	46034	36267	44756	56285	0	0	0	0	0	25919	23885	43773	41135	112136
CFAH_BOVIN	Complement factor H (H factor 1)	42768	61742	75642	85201	88047	48621	28273	23639	66052	15917	0	0	0	0	0	8037	7411	10126	11207	40453
CASK_BOVIN	Kappa-casein [Cleaved into: Casoxin-C; Casoxin-6; Casoxin-A; Casoxin-B; Casoplatelin]	42202	27846	46403	41045	34496	34671	49068	33196	49114	32551	0	0	0	0	0	29217	47569	95246	191330	201114
PROC_BOVIN	Vitamin K-dependent protein C (EC 3.4.21.69) (Anticoagulant protein C) (Autoprothrombin IIA) (Blood coagulation factor XIV) [Cleaved into: Vitamin K-dependent protein C light chain; Vitamin K-dependent protein C heavy chain; Activation peptide]	41878	42463	37663	42424	33884	57925	61971	57579	61079	58687	0	0	0	0	0	5595	4355	8319	6866	10153
HV349_HUMAN	Immunoglobulin heavy variable 3-49	41152	22529	13419	31293	32045	10754	10092	15210	9146	11921	78824	116213	119986	112131	90191	0	0	0	0	0
STOM_HUMAN	Stomatin (Erythrocyte band 7 integral membrane protein) (Erythrocyte membrane protein band 7.2) (Protein 7.2b)	40745	29835	27410	60342	50639	29591	17948	25101	26315	31054	157934	159397	150906	178817	128756	0	0	0	0	0
K1C14_HUMAN	Keratin, type I cytoskeletal 14 (Cytokeratin-14) (CK-14) (Keratin-14) (K14)	40522	37533	58605	33760	46704	15116	56066	17549	21343	24223	128694	173456	138101	149999	210909	0	0	0	0	0
A1AG2_HUMAN	Alpha-1-acid glycoprotein 2 (AGP 2) (Orosomucoid-2) (OMD 2)	39903	21110	17043	22828	14169	8218	10708	19562	5611	9559	59721	56673	61723	38825	105446	0	0	0	0	0
CL43_BOVIN	Collectin-43 (CL-43) (43 kDa collectin)	39345	43041	47252	41242	47042	40251	41837	47040	52266	46627	0	0	0	0	0	2267	1670	9040	7948	12028
CO6_HUMAN	Complement component C6	39090	23047	19030	39008	29988	16126	20603	17396	16422	20653	193516	159415	199643	210465	204476	0	0	0	0	0
C4BPA_HUMAN	C4b-binding protein alpha chain (C4bp) (Proline-rich protein) (PRP)	38974	21028	21165	29528	27665	16482	17169	21576	16696	21240	261276	191821	253667	283845	461023	0	0	0	0	0
KLKB1_HUMAN	Plasma kallikrein (EC 3.4.21.34) (Fletcher factor) (Kininogenin) (Plasma prekallikrein) (PKK) [Cleaved into: Plasma kallikrein heavy chain; Plasma kallikrein light chain]	38744	24120	18228	30912	37569	10533	15446	11974	11925	14357	606965	546589	537544	592834	473222	0	0	0	0	0
C1QC_HUMAN	Complement C1q subcomponent subunit C	38736	27990	22491	39278	36717	6370	7471	10039	9590	7235	245945	332416	263540	439363	307149	0	0	0	0	0
G3P_HUMAN	Glyceraldehyde-3-phosphate dehydrogenase (GAPDH) (EC 1.2.1.12) (Peptidyl-cysteine S-nitrosylase GAPDH) (EC 2.6.99.-)	37772	24600	27705	36609	40780	19804	31936	20501	25844	22019	97418	115555	87239	133460	86833	0	0	0	0	0
K2C78_HUMAN	Keratin, type II cytoskeletal 78 (Cytokeratin-78) (CK-78) (Keratin-5b) (Keratin-78) (K78) (Type-II keratin Kb40)	37540	38610	54494	56007	49174	54458	39631	54403	40049	54514	87597	71492	63237	205542	325372	0	0	0	0	0
ANT3_HUMAN	Antithrombin-III (ATIII) (Serpin C1)	37014	14182	10727	17613	15351	7267	6233	18477	5505	8080	77325	79510	104706	73490	115290	0	0	0	0	0
CO3A1_HUMAN	Collagen alpha-1(III) chain	35844	36269	40013	38191	32592	40658	36454	38868	42726	35405	786	856	1179	1273	1294	0	0	0	0	0
POSTN_HUMAN	Periostin (PN) (Osteoblast-specific factor 2) (OSF-2)	35696	40424	35464	41013	31045	43253	27046	35109	48304	48135	4171	4324	4394	4529	4425	0	0	0	0	0
CO1A2_BOVIN	Collagen alpha-2(I) chain (Alpha-2 type I collagen)	35544	36194	28551	27590	20412	22909	29414	28139	22097	31450	0	0	0	0	0	3341	2586	7400	2602	24067
FA10_BOVIN	Coagulation factor X (EC 3.4.21.6) (Stuart factor) [Cleaved into: Factor X light chain; Factor X heavy chain; Activated factor Xa heavy chain]	35431	31301	29548	37138	36951	37073	56799	42574	34281	59157	0	0	0	0	0	4843	4857	8379	6607	5993
PGRP2_HUMAN	N-acetylmuramoyl-L-alanine amidase (EC 3.5.1.28) (Peptidoglycan recognition protein 2) (Peptidoglycan recognition protein long) (PGRP-L)	35248	21071	13688	22909	16981	7405	9927	13258	8206	9786	101797	80545	108334	87397	111909	0	0	0	0	0
FABPL_BOVIN	Fatty acid-binding protein, liver (Fatty acid-binding protein 1) (Liver-type fatty acid-binding protein) (L-FABP)	35123	37247	38800	38470	27977	33713	30456	39376	43425	36383	0	0	0	0	0	5296	4199	5291	3296	5632
S10A9_HUMAN	Protein S100-A9 (Calgranulin-B) (Calprotectin L1H subunit) (Leukocyte L1 complex heavy chain) (Migration inhibitory factor-related protein 14) (MRP-14) (p14) (S100 calcium-binding protein A9)	35115	26723	16734	38202	33182	22400	28061	17743	18004	28454	136165	152988	157281	129900	98784	0	0	0	0	0
AMBP_HUMAN	Protein AMBP (Protein HC) [Cleaved into: Alpha-1-microglobulin (EC 1.6.2.-) (Alpha-1 microglycoprotein) (Complex-forming glycoprotein heterogeneous in charge); Inter-alpha-trypsin inhibitor light chain (ITI-LC) (Bikunin) (EDC1) (HI-30) (Uronic-acid-rich protein); Trypstatin]	35109	16557	14517	20260	13478	9621	6528	11685	8495	7963	124457	101784	82898	79894	141029	0	0	0	0	0
CFAB_HUMAN	Complement factor B (EC 3.4.21.47) (C3/C5 convertase) (Glycine-rich beta glycoprotein) (GBG) (PBF2) (Properdin factor B) [Cleaved into: Complement factor B Ba fragment; Complement factor B Bb fragment]	34922	15567	12393	17444	14598	6368	6064	13940	6469	6271	123228	106409	112387	105189	143771	0	0	0	0	0
ZPI_HUMAN	Protein Z-dependent protease inhibitor (PZ-dependent protease inhibitor) (PZI) (Serpin A10)	34904	22058	24221	30023	35332	22333	21435	26789	21972	28119	61363	126847	134249	107209	98838	0	0	0	0	0
CO7_BOVIN	Complement component C7	34416	42781	44643	39695	34033	41192	50046	39877	50122	41940	0	0	0	0	0	9592	13638	22848	19506	22224
SAMP_HUMAN	Serum amyloid P-component (SAP) (9.5S alpha-1-glycoprotein) [Cleaved into: Serum amyloid P-component(1-203)]	34037	17553	10423	26992	21516	7708	10660	19991	6780	10795	129008	127964	131942	124395	140719	0	0	0	0	0
CADH5_BOVIN	Cadherin-5 (Vascular endothelial cadherin) (VE-cadherin) (CD antigen CD144)	33817	32552	31402	34491	31860	35641	30560	34688	44076	33984	0	0	0	0	0	2810	2837	2612	2502	3230
THRB_HUMAN	Prothrombin (EC 3.4.21.5) (Coagulation factor II) [Cleaved into: Activation peptide fragment 1; Activation peptide fragment 2; Thrombin light chain; Thrombin heavy chain]	33794	32315	21174	31793	23362	21692	22374	22936	24001	23188	158542	133073	148518	129830	367277	0	0	0	0	0
COMP_BOVIN	Cartilage oligomeric matrix protein (COMP)	32465	36270	33488	32789	24495	26955	35375	26134	26352	33514	0	0	0	0	0	5597	6910	7596	7612	9745
VINC_HUMAN	Vinculin (Metavinculin) (MV)	32337	35947	32346	39496	32442	36426	34655	38357	41805	41114	21838	19477	20926	20806	15239	0	0	0	0	0
CO4B_HUMAN	Complement C4-B (Basic complement C4) (C3 and PZP-like alpha-2-macroglobulin domain-containing protein 3) [Cleaved into: Complement C4 beta chain; Complement C4-B alpha chain; C4a anaphylatoxin; C4b-B; C4d-B; Complement C4 gamma chain]	31691	17849	11453	30394	29205	10106	10846	9916	10199	9792	110319	103335	110446	104626	69673	0	0	0	0	0
F13A_HUMAN	Coagulation factor XIII A chain (Coagulation factor XIIIa) (EC 2.3.2.13) (Protein-glutamine gamma-glutamyltransferase A chain) (Transglutaminase A chain)	31384	23563	16694	43906	25827	15650	16896	15219	22164	17114	33605	57225	48908	36500	34118	0	0	0	0	0
PHLD_BOVIN	Phosphatidylinositol-glycan-specific phospholipase D (PI-G PLD) (EC 3.1.4.50) (Glycoprotein phospholipase D) (Glycosyl-phosphatidylinositol-specific phospholipase D) (GPI-PLD) (GPI-specific phospholipase D)	31267	29726	28842	30063	27540	51206	58616	56720	60514	69504	0	0	0	0	0	3481	4009	5798	4376	6129
CTHL1_BOVIN	Cathelicidin-1 (Bactenecin-1) (Bac1) (Cyclic dodecapeptide)	31259	26118	24423	33219	26218	31987	35302	34634	36406	42977	0	0	0	0	0	3532	7942	427423	380861	463918
LBP_BOVIN	Lipopolysaccharide-binding protein (LBP)	30845	43188	22240	38997	23245	43510	56234	53845	40015	81915	0	0	0	0	0	16722	12917	17725	68861	17218
URP2_BOVIN	Fermitin family homolog 3 (Kindlin-3) (Unc-112-related protein 2)	30760	24346	20714	46342	36461	43177	44854	39942	60063	52983	0	0	0	0	0	32957	104118	827711	484930	229233
APOA4_BOVIN	Apolipoprotein A-IV (Apo-AIV) (ApoA-IV) (Apolipoprotein A4)	29704	30556	26220	30551	30239	28921	27390	28947	35942	35714	0	0	0	0	0	3212	6622	17719	14097	77104
CO8B_HUMAN	Complement component C8 beta chain (Complement component 8 subunit beta)	29636	15593	11249	23435	29001	13774	12880	14673	12020	11561	118476	123733	128977	151379	121881	0	0	0	0	0
REG1_BOVIN	Regakine-1	29348	25601	14091	34404	4137	22244	25013	20656	18838	23971	0	0	0	0	0	1876	1863	1822	837	1372
APOL1_HUMAN	Apolipoprotein L1 (Apolipoprotein L) (Apo-L) (ApoL) (Apolipoprotein L-I) (ApoL-I)	29262	19211	12247	30316	29187	7555	15429	13796	11462	15288	216142	179104	187429	192224	154153	0	0	0	0	0
TFR1_HUMAN	Transferrin receptor protein 1 (TR) (TfR) (TfR1) (Trfr) (T9) (p90) (CD antigen CD71) [Cleaved into: Transferrin receptor protein 1, serum form (sTfR)]	28892	16201	13818	39660	32547	16475	12224	14769	18123	17285	137650	156617	122947	183068	121333	0	0	0	0	0
SAHH_BOVIN	Adenosylhomocysteinase (AdoHcyase) (EC 3.13.2.1) (S-adenosyl-L-homocysteine hydrolase)	28740	30905	18941	20133	27472	34489	50123	39441	51902	54990	0	0	0	0	0	197105	17884	24911	28463	113020
HV551_HUMAN	Immunoglobulin heavy variable 5-51	28229	15342	12301	20762	17999	7455	5794	13616	5632	8013	84959	77031	104166	101610	73533	0	0	0	0	0
CFAI_HUMAN	Complement factor I (EC 3.4.21.45) (C3B/C4B inactivator) [Cleaved into: Complement factor I heavy chain; Complement factor I light chain]	28122	16028	10131	15707	11058	7437	13168	12560	8922	10822	28693	37118	40630	39798	72098	0	0	0	0	0
HGFA_HUMAN	Hepatocyte growth factor activator (HGF activator) (HGFA) (EC 3.4.21.-) [Cleaved into: Hepatocyte growth factor activator short chain; Hepatocyte growth factor activator long chain]	27307	23827	29094	28457	21490	29877	29008	25792	26811	29115	5734	4600	5107	1899	6928	0	0	0	0	0
PRG4_HUMAN	Proteoglycan 4 (Lubricin) (Megakaryocyte-stimulating factor) (Superficial zone proteoglycan) [Cleaved into: Proteoglycan 4 C-terminal part]	27076	19769	18776	22543	21908	15248	15200	17671	20095	16254	102509	109553	110139	104324	94087	0	0	0	0	0
CBPB2_BOVIN	Carboxypeptidase B2 (EC 3.4.17.20) (Carboxypeptidase U) (CPU) (Plasma carboxypeptidase B) (pCPB) (Thrombin-activable fibrinolysis inhibitor) (TAFI)	26000	20962	21446	28338	25662	27719	30476	33847	38140	34045	0	0	0	0	0	4029	3265	63004	7966	20758
IL1AP_HUMAN	Interleukin-1 receptor accessory protein (IL-1 receptor accessory protein) (IL-1RAcP) (EC 3.2.2.6) (Interleukin-1 receptor 3) (IL-1R-3) (IL-1R3)	25899	29015	27455	27317	23531	31265	25751	26779	32028	28271	1329	1505	750	1020	1451	0	0	0	0	0
HV601_HUMAN	Immunoglobulin heavy variable 6-1	25612	13104	10292	20512	16058	5731	5356	10235	4431	8833	78640	62812	93893	79449	70302	0	0	0	0	0
DCD_HUMAN	Dermcidin (EC 3.4.-.-) (Preproteolysin) [Cleaved into: Survival-promoting peptide; DCD-1]	25491	13019	6372	26245	16137	3211	7609	2282	3864	17606	48965	34859	32238	41500	34922	0	0	0	0	0
LG3BP_BOVIN	Galectin-3-binding protein (Lectin galactoside-binding soluble 3-binding protein)	25330	24334	23293	21962	17906	22797	26075	23864	22739	25183	0	0	0	0	0	3644	4524	4195	3765	3785
HABP2_BOVIN	Hyaluronan-binding protein 2 (EC 3.4.21.-) [Cleaved into: Hyaluronan-binding protein 2 50 kDa heavy chain; Hyaluronan-binding protein 2 50 kDa heavy chain alternate form; Hyaluronan-binding protein 2 27 kDa light chain; Hyaluronan-binding protein 2 27 kDa light chain alternate form]	25321	19508	15736	18464	17016	12595	26194	12834	14429	19015	0	0	0	0	0	8463	14622	38041	27513	167547
CATA_BOVIN	Catalase (EC 1.11.1.6)	24923	18012	15135	25379	25410	13612	20036	16285	13017	22778	0	0	0	0	0	5818	4438	32334	28698	50354
COTL1_BOVIN	Coactosin-like protein	24800	25783	27211	23808	25599	30774	29448	29221	29866	28988	0	0	0	0	0	1044	1282	1325	2498	2968
ENOA_BOVIN	Alpha-enolase (EC 4.2.1.11) (2-phospho-D-glycerate hydro-lyase) (Enolase 1) (HAP47) (Non-neural enolase) (NNE) (Phosphopyruvate hydratase)	24617	25036	18559	20461	24250	33043	53844	42283	51807	65579	0	0	0	0	0	13381	3062	107631	152600	169310
THYG_BOVIN	Thyroglobulin (Tg)	24216	25574	27344	24499	18232	27425	18087	32109	33203	23285	0	0	0	0	0	4562	5095	4510	3766	4359
CBPN_BOVIN	Carboxypeptidase N catalytic chain (CPN) (EC 3.4.17.3) (Carboxypeptidase N polypeptide 1) (Carboxypeptidase N small subunit)	23867	29406	31917	29533	27785	38655	45290	49952	52722	49796	0	0	0	0	0	3909	3704	4187	4544	4999
ALS_HUMAN	Insulin-like growth factor-binding protein complex acid labile subunit (ALS)	23618	10887	6947	20542	20250	5341	10167	12055	12398	10336	83839	85550	85386	88962	63122	0	0	0	0	0
ST1E1_BOVIN	Sulfotransferase 1E1 (ST1E1) (EC 2.8.2.4) (Estrogen sulfotransferase) (Sulfotransferase, estrogen-preferring)	22745	30201	19132	29530	18280	51327	66758	66980	58471	99082	0	0	0	0	0	10969	9723	14051	15394	15122
PRDX2_BOVIN	Peroxiredoxin-2 (EC 1.11.1.24) (Thioredoxin-dependent peroxiredoxin 2)	22685	25409	29028	26927	20126	25310	29346	28428	27558	30689	0	0	0	0	0	2385	4550	15689	6236	12136
CO7_HUMAN	Complement component C7	22644	16220	14877	24757	21289	16106	16467	13884	16256	13196	99760	110477	101945	117743	177414	0	0	0	0	0
OMD_BOVIN	Osteomodulin (Keratan sulfate proteoglycan osteomodulin) (KSPG osteomodulin) (Osteoadherin) (OSAD)	21795	26814	26491	21783	19577	27722	26586	30273	31224	29462	0	0	0	0	0	854	657	21140	2056	20396
ITA2B_HUMAN	Integrin alpha-IIb (GPalpha IIb) (GPIIb) (Platelet membrane glycoprotein IIb) (CD antigen CD41) [Cleaved into: Integrin alpha-IIb heavy chain; Integrin alpha-IIb light chain, form 1; Integrin alpha-IIb light chain, form 2]	21431	21356	14777	29809	23543	18369	20562	17745	16500	26773	87006	97454	102331	104143	75399	0	0	0	0	0
PZP_HUMAN	Pregnancy zone protein (C3 and PZP-like alpha-2-macroglobulin domain-containing protein 6)	21424	18812	11486	26590	19062	9010	11923	10479	11789	11159	23269	20522	19460	19432	48981	0	0	0	0	0
BPIB1_HUMAN	BPI fold-containing family B member 1 (Long palate, lung and nasal epithelium carcinoma-associated protein 1) (von Ebner minor salivary gland protein) (VEMSGP)	21372	14660	10114	23214	19711	5310	10641	10495	9858	11635	129703	95780	104493	120293	112206	0	0	0	0	0
S10A8_BOVIN	Protein S100-A8 (BEE11) (Calgranulin-A) (Neutrophil cytosolic 7 kDa protein) (P7) (S100 calcium-binding protein A8)	21229	12470	8001	23960	27022	10355	20259	11764	8180	29346	0	0	0	0	0	2805	4050	45413	52081	32180
HGFL_BOVIN	Hepatocyte growth factor-like protein (Macrophage stimulatory protein) (Macrophage-stimulating protein) (MSP) [Cleaved into: Hepatocyte growth factor-like protein alpha chain; Hepatocyte growth factor-like protein beta chain]	20362	20040	20169	24799	21641	19816	20525	21859	23649	16842	0	0	0	0	0	1950	1714	2623	1440	3888
GSTA1_BOVIN	Glutathione S-transferase A1 (EC 2.5.1.18) (13-hydroperoxyoctadecadienoate peroxidase) (EC 1.11.1.-) (Androst-5-ene-3,17-dione isomerase) (EC 5.3.3.-) (GST class-alpha member 1) (Glutathione S-transferase alpha-1) [Cleaved into: Glutathione S-transferase A1, N-terminally processed]	19888	21954	20561	15937	14828	22485	21313	31801	34026	28021	0	0	0	0	0	5023	19210	24512	13220	14077
FILA_HUMAN	Filaggrin	19858	36030	20731	4567	2464	2475	4171	4112	2907	3774	34698	9558	8853	59761	72223	0	0	0	0	0
ITB3_HUMAN	Integrin beta-3 (Platelet membrane glycoprotein IIIa) (GPIIIa) (CD antigen CD61)	19848	18218	11370	27300	19100	14334	21214	14217	13073	21880	65368	57892	72328	64734	47152	0	0	0	0	0
BLVRB_BOVIN	Flavin reductase (NADPH) (FR) (EC 1.5.1.30) (Biliverdin reductase B) (BVR-B) (EC 1.3.1.24) (Biliverdin-IX beta-reductase) (Green heme-binding protein) (GHBP) (NADPH-dependent diaphorase) (NADPH-flavin reductase) (FLR)	19574	19193	12292	25760	20355	22906	30752	25584	30304	43095	0	0	0	0	0	3629	3033	90662	138573	45843
ATS13_HUMAN	A disintegrin and metalloproteinase with thrombospondin motifs 13 (ADAM-TS 13) (ADAM-TS13) (ADAMTS-13) (EC 3.4.24.87) (von Willebrand factor-cleaving protease) (vWF-CP) (vWF-cleaving protease)	19482	17317	16942	22671	19449	14528	18195	17345	18145	18358	812	857	1219	836	801	0	0	0	0	0
SHBG_HUMAN	Sex hormone-binding globulin (SHBG) (Sex steroid-binding protein) (SBP) (Testis-specific androgen-binding protein) (ABP) (Testosterone-estradiol-binding globulin) (TeBG) (Testosterone-estrogen-binding globulin)	19092	18534	15988	19488	10383	16846	13989	18104	16762	16943	7577	7104	8600	6905	7214	0	0	0	0	0
K2C5_HUMAN	Keratin, type II cytoskeletal 5 (58 kDa cytokeratin) (Cytokeratin-5) (CK-5) (Keratin-5) (K5) (Type-II keratin Kb5)	18942	19074	20531	18367	24446	6378	22431	6541	10388	9336	76811	74782	57905	104167	95474	0	0	0	0	0
KV105_HUMAN	Immunoglobulin kappa variable 1-5 (Ig kappa chain V-I region CAR) (Ig kappa chain V-I region EU) (Ig kappa chain V-I region HK102) (Ig kappa chain V-I region Kue)	18906	11760	6021	12128	11194	4999	7821	10665	4443	8921	55484	45783	56913	62415	59473	0	0	0	0	0
CETP_HUMAN	Cholesteryl ester transfer protein (Lipid transfer protein I)	18605	11954	11093	21458	15384	6382	7319	6072	8994	7703	80716	90731	75734	88121	65920	0	0	0	0	0
PROF1_HUMAN	Profilin-1 (Epididymis tissue protein Li 184a) (Profilin I)	18584	15770	15064	27840	28114	10433	17512	17970	18443	26659	83498	87252	87069	88844	59880	0	0	0	0	0
APOA5_HUMAN	Apolipoprotein A-V (Apo-AV) (ApoA-V) (Apolipoprotein A5) (Regeneration-associated protein 3)	18522	10140	7923	13976	12082	4252	8042	6264	7289	9816	81688	75652	87942	76210	50182	0	0	0	0	0
TRFL_BOVIN	Lactotransferrin (Lactoferrin) (EC 3.4.21.-) [Cleaved into: Lactoferricin-B (Lfcin-B)]	18439	19289	17668	24712	21972	17998	17313	18795	22812	19644	0	0	0	0	0	803	769	683	821	1124
CLIC1_BOVIN	Chloride intracellular channel protein 1	17592	16530	14769	17629	15077	22342	22686	23773	20711	30648	0	0	0	0	0	98655	111675	105598	144091	112518
MPRI_BOVIN	Cation-independent mannose-6-phosphate receptor (CI Man-6-P receptor) (CI-MPR) (M6PR) (300 kDa mannose 6-phosphate receptor) (MPR 300) (Insulin-like growth factor 2 receptor) (Insulin-like growth factor II receptor) (IGF-II receptor) (CD antigen CD222)	17464	17490	17536	17628	15007	17717	17320	20095	23193	18546	0	0	0	0	0	2689	2585	2857	3125	3583
SAA1_HUMAN	Serum amyloid A-1 protein (SAA) [Cleaved into: Amyloid protein A (Amyloid fibril protein AA); Serum amyloid protein A(2-104); Serum amyloid protein A(3-104); Serum amyloid protein A(2-103); Serum amyloid protein A(2-102); Serum amyloid protein A(4-101)]	17215	10046	9550	10730	9919	9077	8693	9894	9851	8462	173276	182971	215257	153637	122062	0	0	0	0	0
CO8G_HUMAN	Complement component C8 gamma chain	17162	9544	7850	14259	13932	7675	8989	8251	7385	8942	64161	69436	53190	60594	55582	0	0	0	0	0
KTDAP_HUMAN	Keratinocyte differentiation-associated protein	17010	16451	6451	9620	23188	4219	5966	4736	5600	4021	3025	2039	7449	1651	2610	0	0	0	0	0
LCAT_HUMAN	Phosphatidylcholine-sterol acyltransferase (EC 2.3.1.43) (1-alkyl-2-acetylglycerophosphocholine esterase) (EC 3.1.1.47) (Lecithin-cholesterol acyltransferase) (Phospholipid-cholesterol acyltransferase) (Platelet-activating factor acetylhydrolase) (PAF acetylhydrolase)	17007	9875	10961	22798	17770	14613	10994	14532	11121	14706	24328	21679	19970	15704	42410	0	0	0	0	0
LG3BP_HUMAN	Galectin-3-binding protein (Basement membrane autoantigen p105) (Lectin galactoside-binding soluble 3-binding protein) (Mac-2-binding protein) (MAC2BP) (Mac-2 BP) (Tumor-associated antigen 90K)	16948	10513	7161	15136	10881	4672	5058	5331	4847	6635	61456	69142	66660	64842	54151	0	0	0	0	0
LUM_HUMAN	Lumican (Keratan sulfate proteoglycan lumican) (KSPG lumican)	16907	5186	7499	11205	12312	5545	4913	8396	4745	5145	33156	28762	45599	18455	45249	0	0	0	0	0
HP252_BOVIN	Protein HP-25 homolog 2	16766	16831	17437	13811	13051	21194	14788	27631	24483	19032	0	0	0	0	0	1755	1999	2532	1559	1454
CFAH_HUMAN	Complement factor H (H factor 1)	16751	8198	8549	11362	8824	5357	5389	6470	5636	5240	228337	176649	176065	213015	303648	0	0	0	0	0
LV151_HUMAN	Immunoglobulin lambda variable 1-51 (Ig lambda chain V-I region BL2) (Ig lambda chain V-I region EPS) (Ig lambda chain V-I region NEW) (Ig lambda chain V-I region NIG-64)	16545	10243	7809	12821	13697	5420	3913	5887	3754	5033	72598	69571	95869	74150	64047	0	0	0	0	0
HBD_HUMAN	Hemoglobin subunit delta (Delta-globin) (Hemoglobin delta chain)	16402	12869	8454	19807	16323	9422	11947	7612	7588	14794	61133	61670	64359	61495	47345	0	0	0	0	0
ANXA5_BOVIN	Annexin A5 (Anchorin CII) (Annexin V) (Annexin-5) (Calphobindin I) (CPB-I) (Endonexin II) (Lipocortin V) (Placental anticoagulant protein 4) (Placental anticoagulant protein I) (PAP-I) (Thromboplastin inhibitor) (Vascular anticoagulant-alpha) (VAC-alpha)	16394	11838	9098	17069	17342	9949	13036	12995	9014	15336	0	0	0	0	0	8956	9009	33864	73080	37088
IGHD_HUMAN	Immunoglobulin heavy constant delta (Ig delta chain C region) (Ig delta chain C region NIG-65) (Ig delta chain C region WAH)	16129	7026	4267	7835	8029	2569	3418	3368	2836	3844	60150	52655	71253	67788	74867	0	0	0	0	0
GGH_BOVIN	Gamma-glutamyl hydrolase (EC 3.4.19.9) (Conjugase) (GH) (Gamma-Glu-X carboxypeptidase)	16120	15666	16251	13972	14365	22130	26353	29154	28529	32274	0	0	0	0	0	5366	5189	5401	8268	6964
GP1BB_HUMAN	Platelet glycoprotein Ib beta chain (GP-Ib beta) (GPIb-beta) (GPIbB) (Antigen CD42b-beta) (CD antigen CD42c)	16048	12989	6803	24674	21633	16317	6395	9820	13987	8864	95040	78149	61040	103347	66297	0	0	0	0	0
CO8A_HUMAN	Complement component C8 alpha chain (Complement component 8 subunit alpha)	16024	10352	9782	14002	10571	7464	9630	8054	6571	8916	45260	38862	40306	41486	57725	0	0	0	0	0
ESTD_BOVIN	S-formylglutathione hydrolase (FGH) (EC 3.1.2.12) (Esterase D)	15986	13852	12273	16113	13323	29056	38511	30936	24534	49779	0	0	0	0	0	11468	6264	9988	8375	11067
VCAM1_HUMAN	Vascular cell adhesion protein 1 (V-CAM 1) (VCAM-1) (INCAM-100) (CD antigen CD106) [Cleaved into: Soluble Vascular Cell Adhesion Molecule-1]	15924	15179	17481	12538	13231	12646	14245	16954	13468	14675	911	927	973	1145	1241	0	0	0	0	0
NCAM1_BOVIN	Neural cell adhesion molecule 1 (N-CAM-1) (NCAM-1)	15920	16610	13628	15827	11071	14337	12936	16414	17175	14410	0	0	0	0	0	2420	2107	1441	1797	1799
BGH3_BOVIN	Transforming growth factor-beta-induced protein ig-h3 (Beta ig-h3) (MP70) (MP78)	15829	24062	32221	38851	37562	28182	8651	13449	42011	11832	0	0	0	0	0	5138	5511	7784	6037	8296
CFAD_BOVIN	Complement factor D (EC 3.4.21.46) (Adipsin) (C3 convertase activator) (Properdin factor D)	15697	17834	15036	14610	13585	15427	14718	17798	19265	18874	0	0	0	0	0	1405	1365	1222	1973	1589
CATD_BOVIN	Cathepsin D (EC 3.4.23.5)	15680	14928	11017	12630	13004	18575	13480	19585	24464	21868	0	0	0	0	0	1145	1435	2779	2144	2275
GOLM1_HUMAN	Golgi membrane protein 1 (Golgi membrane protein GP73) (Golgi phosphoprotein 2)	15592	12061	8423	13092	13120	8765	6427	8618	6251	9448	58117	57645	71069	57827	44240	0	0	0	0	0
FCN1_HUMAN	Ficolin-1 (Collagen/fibrinogen domain-containing protein 1) (Ficolin-A) (Ficolin-alpha) (M-ficolin)	15330	13321	11495	15239	22301	6334	5541	5639	5408	6930	168181	207815	154762	192944	96983	0	0	0	0	0
MGP_BOVIN	Matrix Gla protein (MGP) [Cleaved into: Matrix Gla protein long form; Matrix Gla protein short form]	15215	7715	4636	12683	15733	7202	9926	7473	9091	13571	0	0	0	0	0	979	23456	113981	101266	125726
C1QT3_HUMAN	Complement C1q tumor necrosis factor-related protein 3 (Collagenous repeat-containing sequence 26 kDa protein) (CORS26) (Secretory protein CORS26)	15170	13680	11267	12206	16393	18004	12828	19871	13865	11931	2685	4080	1765	4262	1904	0	0	0	0	0
LV321_HUMAN	Immunoglobulin lambda variable 3-21 (Ig lambda chain V-III region LOI) (Ig lambda chain V-V region DEL) (Ig lambda chain V-VII region MOT)	15041	7243	6017	7692	6619	2328	2587	7074	2975	2953	44863	27840	39394	22532	44407	0	0	0	0	0
PLMN_HUMAN	Plasminogen (EC 3.4.21.7) [Cleaved into: Plasmin heavy chain A; Activation peptide; Angiostatin; Plasmin heavy chain A, short form; Plasmin light chain B]	15024	13234	15894	14438	14725	11471	10930	12976	9878	13180	93012	44345	53775	112420	271068	0	0	0	0	0
AOCX_BOVIN	Primary amine oxidase, liver isozyme (EC 1.4.3.21) (Amine oxidase [copper-containing]) (Copper amine oxidase) (Serum amine oxidase) (SAO)	14932	16668	11922	12276	11776	17005	14812	14667	15196	13742	0	0	0	0	0	1751	1508	1538	1547	1753
ITIH1_HUMAN	Inter-alpha-trypsin inhibitor heavy chain H1 (ITI heavy chain H1) (ITI-HC1) (Inter-alpha-inhibitor heavy chain 1) (Inter-alpha-trypsin inhibitor complex component III) (Serum-derived hyaluronan-associated protein) (SHAP)	14920	5286	4051	8334	10140	2652	2738	5746	3024	2972	25618	27254	29269	26146	43251	0	0	0	0	0
CBG_HUMAN	Corticosteroid-binding globulin (CBG) (Serpin A6) (Transcortin)	14755	5373	6690	6766	8453	3100	3440	7682	2154	2304	27482	26236	32434	19646	43187	0	0	0	0	0
MOES_BOVIN	Moesin (Membrane-organizing extension spike protein)	14737	12408	12934	16622	17234	13956	15233	18175	12616	11477	0	0	0	0	0	1678	1771	1360	1421	1582
CO6A3_HUMAN	Collagen alpha-3(VI) chain	14504	15017	11778	10501	9339	13904	13610	15088	14369	16910	2583	2097	2988	2801	2602	0	0	0	0	0
GNAI2_HUMAN	Guanine nucleotide-binding protein G(i) subunit alpha-2 (Adenylate cyclase-inhibiting G alpha protein)	14286	12972	9948	18024	9248	11159	7312	9419	7129	10801	46181	39661	39762	66671	56575	0	0	0	0	0
RGN_BOVIN	Regucalcin (RC) (Gluconolactonase) (GNL) (EC 3.1.1.17) (Senescence marker protein 30) (SMP-30)	14167	15604	7368	12105	11404	18805	20470	20134	18997	24841	0	0	0	0	0	5781	4482	10342	7185	9854
HGD_HUMAN	Homogentisate 1,2-dioxygenase (EC 1.13.11.5) (Homogentisate oxygenase) (Homogentisic acid oxidase) (Homogentisicase)	13972	10787	7735	16176	6741	23706	29704	27928	24185	34399	1333	1693	1538	1544	1273	0	0	0	0	0
CD14_HUMAN	Monocyte differentiation antigen CD14 (Myeloid cell-specific leucine-rich glycoprotein) (CD antigen CD14) [Cleaved into: Monocyte differentiation antigen CD14, urinary form; Monocyte differentiation antigen CD14, membrane-bound form]	13693	9676	5248	7913	7111	2716	3379	5190	7040	3416	20168	11083	21708	14117	14382	0	0	0	0	0
ALDOA_HUMAN	Fructose-bisphosphate aldolase A (EC 4.1.2.13) (Lung cancer antigen NY-LU-1) (Muscle-type aldolase)	13566	13338	11680	14930	16996	12784	15304	12309	14755	16578	25427	29994	30633	28435	15545	0	0	0	0	0
DDBX_BOVIN	Dihydrodiol dehydrogenase 3 (EC 1.-.-.-) (Prostaglandin F synthase)	13563	13636	11553	14674	12539	22704	31186	28179	27390	39174	0	0	0	0	0	2708	2904	8314	4782	7737
CTHL4_BOVIN	Cathelicidin-4 (Indolicidin)	13409	11151	9189	7006	6379	8392	11191	7703	9321	10912	0	0	0	0	0	3742	3885	58573	61871	61770
VWF_BOVIN	von Willebrand factor (vWF)	13210	14315	15307	14383	10847	16339	15248	17273	17405	14524	0	0	0	0	0	1990	2086	2919	2826	2641
A2GL_HUMAN	Leucine-rich alpha-2-glycoprotein (LRG)	12894	5052	5057	5949	5095	3003	2847	7018	3611	4791	13938	14732	19994	7276	27476	0	0	0	0	0
CAH2_BOVIN	Carbonic anhydrase 2 (EC 4.2.1.1) (Carbonate dehydratase II) (Carbonic anhydrase II) (CA-II)	12863	14654	14121	14000	12246	13205	12922	15743	16420	13492	0	0	0	0	0	1227	1224	1137	1793	2430
MGAT3_HUMAN	Beta-1,4-mannosyl-glycoprotein 4-beta-N-acetylglucosaminyltransferase (EC 2.4.1.144) (N-glycosyl-oligosaccharide-glycoprotein N-acetylglucosaminyltransferase III) (GNT-III) (GlcNAc-T III) (N-acetylglucosaminyltransferase III)	12794	9810	5870	12743	12408	3172	4006	4285	3700	5990	28533	30593	37995	35089	24971	0	0	0	0	0
LRC15_HUMAN	Bleomycin hydrolase (BH) (BLM hydrolase) (BMH) (EC 3.4.22.40)	12767	752	1255	1467	960	974	1239	1512	1213	839	1088	878	1085	653	8509	0	0	0	0	0
AFAM_HUMAN	Afamin (Alpha-albumin) (Alpha-Alb)	12713	4619	3791	5392	3643	2724	1904	4244	1927	2814	17998	16074	18604	14392	41203	0	0	0	0	0
MIME_BOVIN	Mimecan (Osteoglycin) [Cleaved into: Corneal keratan sulfate proteoglycan 25 core protein (KSPG25 protein); Osteoinductive factor (OIF)]	12632	15091	16092	15025	16039	19829	16443	16626	15192	17448	0	0	0	0	0	1383	1557	1293	1698	1443
FCN2_HUMAN	Ficolin-2 (37 kDa elastin-binding protein) (Collagen/fibrinogen domain-containing protein 2) (EBP-37) (Ficolin-B) (Ficolin-beta) (Hucolin) (L-ficolin) (Serum lectin p35)	12532	7450	9925	11613	10590	8295	8327	9946	6478	8504	115600	123378	139819	348673	91302	0	0	0	0	0
EHD3_HUMAN	EH domain-containing protein 3 (PAST homolog 3)	12492	10488	7542	14339	13537	16694	22124	16572	16461	25343	3862	3417	3141	2793	3298	0	0	0	0	0
CATC_BOVIN	Dipeptidyl peptidase 1 (EC 3.4.14.1) (Cathepsin C) (Cathepsin J) (Dipeptidyl peptidase I) (DPP-I) (DPPI) (Dipeptidyl transferase) [Cleaved into: Dipeptidyl peptidase 1 exclusion domain chain (Dipeptidyl peptidase I exclusion domain chain); Dipeptidyl peptidase 1 heavy chain (Dipeptidyl peptidase I heavy chain); Dipeptidyl peptidase 1 light chain (Dipeptidyl peptidase I light chain)]	12484	12894	14289	10818	10102	16299	12808	21575	19195	17069	0	0	0	0	0	2374	2238	2512	2177	1998
SPA35_BOVIN	Serpin A3-5	12428	12656	11996	13327	13213	14317	13779	13331	16134	15676	0	0	0	0	0	1580	1509	1634	1530	1809
FCN2_BOVIN	Ficolin-2 (Collagen/fibrinogen domain-containing protein 2) (Ficolin-B) (Ficolin-beta) (L-ficolin)	12394	6613	5990	12801	12372	11643	13075	12945	6779	20849	0	0	0	0	0	2991	3714	4578	3874	3493
LAMP2_HUMAN	Lysosome-associated membrane glycoprotein 2 (LAMP-2) (Lysosome-associated membrane protein 2) (CD107 antigen-like family member B) (LGP-96) (CD antigen CD107b)	12335	10579	8114	5562	7995	7044	7039	7053	8735	5472	5455	8583	3699	7091	5549	0	0	0	0	0
TPIS_BOVIN	Triosephosphate isomerase (TIM) (EC 5.3.1.1) (Methylglyoxal synthase) (EC 4.2.3.3) (Triose-phosphate isomerase)	12192	15153	15494	13374	12989	15162	14328	18288	18866	13906	0	0	0	0	0	1275	1398	1231	1120	1858
CD9_BOVIN	CD9 antigen (CD antigen CD9)	12100	8596	6891	16472	14172	9605	10072	10006	8824	13200	0	0	0	0	0	1106	24272	98648	136373	68605
CPNS1_BOVIN	Calpain small subunit 1 (CSS1) (Calcium-activated neutral proteinase small subunit) (CANP small subunit) (Calcium-dependent protease small subunit) (CDPS) (Calcium-dependent protease small subunit 1) (Calpain regulatory subunit)	11639	10167	5352	11944	10490	12175	24401	21195	22251	31998	0	0	0	0	0	64545	57804	80698	141617	80274
S10A8_HUMAN	Protein S100-A8 (Calgranulin-A) (Calprotectin L1L subunit) (Cystic fibrosis antigen) (CFAG) (Leukocyte L1 complex light chain) (Migration inhibitory factor-related protein 8) (MRP-8) (p8) (S100 calcium-binding protein A8) (Urinary stone protein band A)	11606	7466	5928	13437	11217	5550	6589	4731	5912	7836	73946	66405	80757	65937	56153	0	0	0	0	0
PTGDS_BOVIN	Prostaglandin-H2 D-isomerase (EC 5.3.99.2) (Glutathione-independent PGD synthase) (Lipocalin-type prostaglandin-D synthase) (Prostaglandin-D2 synthase) (PGD2 synthase) (PGDS) (PGDS2)	11484	11667	12511	10396	7388	13305	6457	12123	11940	7251	0	0	0	0	0	768	655	505	674	458
C1QA_BOVIN	Complement C1q subcomponent subunit A	11466	9940	8237	15998	14632	5498	11548	6630	6057	8643	0	0	0	0	0	291333	458017	530542	474553	451052
HV64D_HUMAN	Immunoglobulin heavy variable 3-64D	11377	7335	17049	10759	12071	3670	4373	4403	2678	4006	12761	10079	16117	17272	20795	0	0	0	0	0
K1C16_HUMAN	Keratin, type I cytoskeletal 16 (Cytokeratin-16) (CK-16) (Keratin-16) (K16)	11320	5093	9270	3773	8290	2531	11189	4139	2856	2670	26115	18099	9836	8372	15971	0	0	0	0	0
PCYOX_HUMAN	Prenylcysteine oxidase 1 (EC 1.8.3.5) (Prenylcysteine lyase)	11201	5715	5893	12300	7070	3825	4457	5994	5826	5867	64930	63943	63475	61368	48898	0	0	0	0	0
URP2_HUMAN	Fermitin family homolog 3 (Kindlin-3) (MIG2-like protein) (Unc-112-related protein 2)	11184	9632	6267	20898	15242	7961	5924	6528	7020	7916	71688	73981	69684	90234	59408	0	0	0	0	0
PEBP1_BOVIN	Phosphatidylethanolamine-binding protein 1 (PEBP-1) (Basic cytosolic 21 kDa protein) (HCNPpp) [Cleaved into: Hippocampal cholinergic neurostimulating peptide (HCNP)]	11180	12344	10722	11068	9286	12624	11737	14243	12568	14798	0	0	0	0	0	1755	1840	4326	3267	3886
APT_BOVIN	Adenine phosphoribosyltransferase (APRT) (EC 2.4.2.7)	11054	9945	8973	12382	9430	9401	14404	7675	12361	15717	0	0	0	0	0	11081	14670	47923	65132	40070
GALK1_BOVIN	Galactokinase (EC 2.7.1.6) (Galactose kinase)	10906	9048	8645	10029	7446	13712	20292	16070	14066	25215	0	0	0	0	0	4476	7708	26089	20442	119499
MA1A1_HUMAN	Mannosyl-oligosaccharide 1,2-alpha-mannosidase IA (EC 3.2.1.113) (Man(9)-alpha-mannosidase) (Man9-mannosidase) (Mannosidase alpha class 1A member 1) (Processing alpha-1,2-mannosidase IA) (Alpha-1,2-mannosidase IA)	10779	6286	4578	9214	4930	4334	4987	6337	4392	5899	3566	9175	10700	8828	5532	0	0	0	0	0
VIME_HUMAN	Vimentin	10681	6267	6034	7681	19640	4189	14310	6578	3502	9252	27594	39772	40560	60503	18061	0	0	0	0	0
PARVB_HUMAN	Beta-parvin (Affixin)	10675	8764	6697	14737	10510	10509	14665	13083	11556	16426	13448	20872	18654	18171	15981	0	0	0	0	0
PLSL_HUMAN	Plastin-2 (L-plastin) (LC64P) (Lymphocyte cytosolic protein 1) (LCP-1)	10672	14264	12097	16454	11322	10573	10226	12722	12330	14062	29391	30345	33424	24471	21505	0	0	0	0	0
PUR8_BOVIN	Adenylosuccinate lyase (ADSL) (ASL) (EC 4.3.2.2) (Adenylosuccinase) (ASase)	10616	8203	4007	7063	5633	10409	17338	11741	14413	20619	0	0	0	0	0	2249	2151	3595	2944	3494
CD14_BOVIN	Monocyte differentiation antigen CD14 (Myeloid cell-specific leucine-rich glycoprotein) (CD antigen CD14)	10585	13132	11882	11982	10978	11131	12329	14317	14408	14786	0	0	0	0	0	7740	6399	9294	23743	18717
PLEK_HUMAN	Pleckstrin (Platelet 47 kDa protein) (p47)	10464	10264	9091	18380	12170	18740	9729	13878	12830	13492	10580	17266	14028	14990	11269	0	0	0	0	0
APOF_HUMAN	Apolipoprotein F (Apo-F) (Lipid transfer inhibitor protein) (LTIP)	10372	7160	4776	10093	7462	2520	3135	3319	2971	3634	55983	60072	62545	33466	37927	0	0	0	0	0
CNTN1_BOVIN	Contactin-1 (Neural cell surface protein F3)	10318	10486	11203	9304	7577	9676	10557	11711	11028	9485	0	0	0	0	0	1277	1430	1399	1694	1319
FRIH_BOVIN	Ferritin heavy chain (Ferritin H subunit) (EC 1.16.3.1) [Cleaved into: Ferritin heavy chain, N-terminally processed]	10182	8196	6259	12288	10443	7087	10728	8517	9406	10255	0	0	0	0	0	1165	1040	1161	891	1249
GPX3_HUMAN	Glutathione peroxidase 3 (GPx-3) (GSHPx-3) (EC 1.11.1.9) (Extracellular glutathione peroxidase) (Plasma glutathione peroxidase) (GPx-P) (GSHPx-P)	10173	6241	4012	7275	5487	2296	2801	2897	1728	3070	43645	38048	43228	39361	28824	0	0	0	0	0
C1S_BOVIN	Complement C1s subcomponent (EC 3.4.21.42) (C1 esterase) (Complement component 1 subcomponent s) [Cleaved into: Complement C1s subcomponent heavy chain; Complement C1s subcomponent light chain]	10085	10591	9793	12175	10092	8376	10859	9923	10646	11945	0	0	0	0	0	3061	6443	101185	98765	99845
S10A6_HUMAN	Protein S100-A6 (Calcyclin) (Growth factor-inducible protein 2A9) (MLN 4) (Prolactin receptor-associated protein) (PRA) (S100 calcium-binding protein A6)	9935	8584	9233	13925	15333	6647	9413	2768	5763	9062	35110	31195	39752	25116	23267	0	0	0	0	0
PGRP1_BOVIN	Peptidoglycan recognition protein 1 (Oligosaccharide-binding protein) (OBP) (Peptidoglycan recognition protein short) (PGRP-S)	9895	9203	8282	11215	11716	15666	5346	12955	16303	6687	0	0	0	0	0	849	967	823	991	822
TPM4_HUMAN	Tropomyosin alpha-4 chain (TM30p1) (Tropomyosin-4)	9842	9006	8471	10604	9089	11690	11994	12270	12753	14175	5361	8691	6694	6962	4892	0	0	0	0	0
TAGL2_BOVIN	Transgelin-2	9783	11722	7476	7510	6591	6948	11253	7627	8972	8216	0	0	0	0	0	3389	4504	4976	8385	65999
CASB_BOVIN	Beta-casein [Cleaved into: Casoparan; Antioxidant peptide; Casohypotensin]	9642	10710	8095	8584	17734	11138	5635	7105	5531	9016	0	0	0	0	0	29200	218734	377381	428527	359398
ECM1_HUMAN	Extracellular matrix protein 1 (Secretory component p85)	9626	9007	5635	8612	6924	6194	3974	5525	4833	6463	5780	21180	8147	5715	9549	0	0	0	0	0
OLFL3_BOVIN	Olfactomedin-like protein 3	9610	7563	6400	14295	8851	5483	5810	4906	5357	6154	0	0	0	0	0	91257	11697	107296	89267	160579
MBP_HUMAN	Myelin basic protein (MBP) (Myelin A1 protein) (Myelin membrane encephalitogenic protein)	9586	9141	6055	9815	22104	9893	13077	9010	5833	10235	49695	63360	58141	75622	23672	0	0	0	0	0
MDHC_BOVIN	Malate dehydrogenase, cytoplasmic (EC 1.1.1.37) (Aromatic alpha-keto acid reductase) (KAR) (EC 1.1.1.96) (Cytosolic malate dehydrogenase)	9503	13624	10914	12600	11320	11070	10596	12367	14062	11331	0	0	0	0	0	1230	887	1904	1655	2249
FA5_HUMAN	Coagulation factor V (Activated protein C cofactor) (Proaccelerin, labile factor) [Cleaved into: Coagulation factor V heavy chain; Coagulation factor V light chain]	9427	6805	5557	10053	9475	4648	5202	4677	5181	5110	74776	64206	68207	72783	56762	0	0	0	0	0
CYTC_BOVIN	Cystatin-C (Colostrum thiol proteinase inhibitor) (Cystatin-3)	9394	8502	11053	9773	6087	10068	6716	12546	10100	6997	0	0	0	0	0	1255	1283	1148	1358	842
ANGL3_HUMAN	Angiopoietin-related protein 3 (Angiopoietin-5) (ANG-5) (Angiopoietin-like protein 3) [Cleaved into: ANGPTL3(17-221); ANGPTL3(17-224)]	9368	7896	7313	7243	6581	6971	7482	9192	9821	8226	6061	5821	6778	4310	5327	0	0	0	0	0
PTGR1_BOVIN	Prostaglandin reductase 1 (PRG-1) (15-oxoprostaglandin 13-reductase) (EC 1.3.1.48) (Dithiolethione-inducible gene 1 protein) (D3T-inducible gene 1 protein) (DIG-1) (Leukotriene B4 12-hydroxydehydrogenase) (NAD(P)H-dependent alkenal/one oxidoreductase) (EC 1.3.1.74)	9296	9208	9103	10369	8761	16520	16934	16466	19413	22054	0	0	0	0	0	2764	2051	2776	1946	2222
NID1_HUMAN	Nidogen-1 (NID-1) (Entactin)	9288	7854	5103	7624	6577	5287	5765	6345	6323	7094	658	696	766	787	771	0	0	0	0	0
EPCR_BOVIN	Endothelial protein C receptor (Activated protein C receptor) (APC receptor) (Endothelial cell protein C receptor) (CD antigen CD201)	9278	6982	6233	5991	5879	5687	5692	6743	5760	5902	0	0	0	0	0	612	625	820	691	510
LYOX_BOVIN	Protein-lysine 6-oxidase (EC 1.4.3.13) (Lysyl oxidase) [Cleaved into: Protein-lysine 6-oxidase, long form; Protein-lysine 6-oxidase, short form]	9244	9187	10637	9642	10686	6708	9095	8886	12873	4224	0	0	0	0	0	1813	2440	2713	2881	2850
PYGL_BOVIN	Glycogen phosphorylase, liver form (EC 2.4.1.1)	9166	9132	7945	14324	14596	19169	12684	15969	23010	15909	0	0	0	0	0	2909	2494	5709	3467	4521
FILA2_HUMAN	Filaggrin-2 (FLG-2) (Intermediate filament-associated and psoriasis-susceptibility protein) (Ifapsoriasin)	9112	10332	5164	4805	3795	3152	5801	2970	5976	4719	7642	17713	12324	22008	32690	0	0	0	0	0
COR1C_HUMAN	Coronin-1C (Coronin-3) (hCRNN4)	9100	7383	6383	12837	13010	16323	14332	17603	20441	17688	4375	6986	5561	10378	5322	0	0	0	0	0
ANXA5_HUMAN	Annexin A5 (Anchorin CII) (Annexin V) (Annexin-5) (Calphobindin I) (CPB-I) (Endonexin II) (Lipocortin V) (Placental anticoagulant protein 4) (PP4) (Placental anticoagulant protein I) (PAP-I) (Thromboplastin inhibitor) (Vascular anticoagulant-alpha) (VAC-alpha)	8927	8246	4024	9654	10415	5934	8185	7567	6013	9815	6425	7621	9419	8692	6929	0	0	0	0	0
ACBP_BOVIN	Acyl-CoA-binding protein (ACBP) (Diazepam-binding inhibitor) (DBI) (Endozepine) (EP)	8907	8346	8621	10993	15045	10214	7853	3422	16736	8887	0	0	0	0	0	4065	3803	3770	4631	4040
LGUL_HUMAN	Lactoylglutathione lyase (EC 4.4.1.5) (Aldoketomutase) (Glyoxalase I) (Glx I) (Ketone-aldehyde mutase) (Methylglyoxalase) (S-D-lactoylglutathione methylglyoxal lyase)	8886	9164	9155	9492	9256	8224	12483	8908	10185	10975	1244	510	1193	346	506	0	0	0	0	0
PLA1A_BOVIN	Phospholipase A1 member A (EC 3.1.1.111)	8752	8067	6230	9427	7405	9442	10589	9711	9449	12197	0	0	0	0	0	2306	988	37490	26975	27367
COL10_HUMAN	Collectin-10 (Collectin liver protein 1) (CL-L1) (Collectin-34) (CL-34)	8636	9000	8359	9975	6694	7759	8188	12544	10167	9207	6139	5298	11708	4757	5007	0	0	0	0	0
CILP2_HUMAN	Cartilage intermediate layer protein 2 (CILP-2) [Cleaved into: Cartilage intermediate layer protein 2 C1; Cartilage intermediate layer protein 2 C2]	8527	10083	9277	8398	8805	12560	13638	14739	19050	14445	787	1006	687	807	835	0	0	0	0	0
LDHA_BOVIN	L-lactate dehydrogenase A chain (LDH-A) (EC 1.1.1.27) (LDH muscle subunit) (LDH-M)	8455	8876	7651	8366	9744	14388	16880	16432	19264	17653	0	0	0	0	0	4612	3004	96047	10609	8015
PGK1_BOVIN	Phosphoglycerate kinase 1 (EC 2.7.2.3)	8450	11092	7628	13048	8840	19736	40063	26892	35593	38883	0	0	0	0	0	106494	15662	141677	142983	134465
PROS_HUMAN	Vitamin K-dependent protein S	8394	3343	3632	4340	4464	2955	2659	3785	2961	3022	37086	33759	50559	43706	49762	0	0	0	0	0
CLC11_HUMAN	C-type lectin domain family 11 member A (C-type lectin superfamily member 3) (Lymphocyte secreted C-type lectin) (Osteolectin) (Stem cell growth factor) (p47)	8357	11823	7711	9417	9522	8848	9401	11879	11836	12156	1463	1446	1306	1279	1752	0	0	0	0	0
B4GT1_BOVIN	Beta-1,4-galactosyltransferase 1 (Beta-1,4-GalTase 1) (Beta4Gal-T1) (b4Gal-T1) (EC 2.4.1.-) (Beta-N-acetylglucosaminyl-glycolipid beta-1,4-galactosyltransferase) (Beta-N-acetylglucosaminylglycopeptide beta-1,4-galactosyltransferase) (EC 2.4.1.38) (Lactose synthase A protein) (EC 2.4.1.22) (N-acetyllactosamine synthase) (EC 2.4.1.90) (Nal synthase) (Neolactotriaosylceramide beta-1,4-galactosyltran…	8324	8228	8547	7384	4081	5510	6885	11035	10046	9083	0	0	0	0	0	2803	2176	2049	2035	2455
FBLN3_HUMAN	EGF-containing fibulin-like extracellular matrix protein 1 (Extracellular protein S1-5) (Fibrillin-like protein) (Fibulin-3) (FIBL-3)	8292	7031	5412	6615	8454	9580	7306	8756	9636	8003	1147	1472	1055	1255	3201	0	0	0	0	0
C1QB_BOVIN	Complement C1q subcomponent subunit B	8218	7937	8893	12045	19901	7356	7082	7151	10706	5734	0	0	0	0	0	1509	1494	2054	1681	1998
VWF_HUMAN	von Willebrand factor (vWF) [Cleaved into: von Willebrand antigen 2 (von Willebrand antigen II)]	8100	5059	5162	7523	6243	4409	3875	4493	4383	4949	42017	45101	44022	44888	33733	0	0	0	0	0
AK1A1_BOVIN	Aldo-keto reductase family 1 member A1 (EC 1.1.1.2) (EC 1.1.1.33) (EC 1.1.1.372) (EC 1.1.1.54) (Alcohol dehydrogenase [NADP(+)]) (Aldehyde reductase) (Glucuronate reductase) (EC 1.1.1.19) (Glucuronolactone reductase) (EC 1.1.1.20)	8085	9182	7472	9382	5483	9991	12201	16559	14812	14956	0	0	0	0	0	1207	1173	925	1664	1717
LEG1_BOVIN	Galectin-1 (Gal-1) (14 kDa lectin) (Beta-galactoside-binding lectin L-14-I) (Galaptin) (Lactose-binding lectin 1) (Lectin galactoside-binding soluble 1) (S-Lac lectin 1)	8080	7243	6083	7480	6782	7029	8118	7155	7796	9692	0	0	0	0	0	854	706	66246	40696	77983
B2MG_HUMAN	Beta-2-microglobulin [Cleaved into: Beta-2-microglobulin form pI 5.3]	7992	5223	3597	9575	8615	2590	3933	4103	1660	4225	36361	32945	38949	35419	21895	0	0	0	0	0
TKT_BOVIN	Transketolase (TK) (EC 2.2.1.1)	7925	7355	6068	6021	6881	9336	9330	10580	9309	10110	0	0	0	0	0	2622	2890	3456	2584	2963
DOPD_BOVIN	D-dopachrome decarboxylase (EC 4.1.1.84) (D-dopachrome tautomerase)	7899	10105	10342	6935	5365	9119	6025	11674	12462	6110	0	0	0	0	0	472	392	581	709	770
SERC_HUMAN	Phosphoserine aminotransferase (EC 2.6.1.52) (Phosphohydroxythreonine aminotransferase) (PSAT)	7848	8030	4732	7355	4985	11620	17644	16672	14979	24007	966	619	771	593	793	0	0	0	0	0
ENOA_HUMAN	Alpha-enolase (EC 4.2.1.11) (2-phospho-D-glycerate hydro-lyase) (C-myc promoter-binding protein) (Enolase 1) (MBP-1) (MPB-1) (Non-neural enolase) (NNE) (Phosphopyruvate hydratase) (Plasminogen-binding protein)	7832	7228	7456	9286	10216	5707	8459	6859	7884	8506	29253	23066	29205	32630	24035	0	0	0	0	0
MASP1_HUMAN	Mannan-binding lectin serine protease 1 (EC 3.4.21.-) (Complement factor MASP-3) (Complement-activating component of Ra-reactive factor) (Mannose-binding lectin-associated serine protease 1) (MASP-1) (Mannose-binding protein-associated serine protease) (Ra-reactive factor serine protease p100) (RaRF) (Serine protease 5) [Cleaved into: Mannan-binding lectin serine protease 1 heavy chain; Mannan-bi…	7808	7089	7558	8669	7909	5631	6190	5803	5407	7237	46187	45196	40146	57952	35156	0	0	0	0	0
PTPRC_HUMAN	Receptor-type tyrosine-protein phosphatase C (EC 3.1.3.48) (Leukocyte common antigen) (L-CA) (T200) (CD antigen CD45)	7794	8555	6481	13247	11767	6845	6321	6810	6902	7498	37607	41917	42214	45241	26539	0	0	0	0	0
PI42A_HUMAN	Phosphatidylinositol 5-phosphate 4-kinase type-2 alpha (EC 2.7.1.149) (1-phosphatidylinositol 5-phosphate 4-kinase 2-alpha) (Diphosphoinositide kinase 2-alpha) (PIP5KIII) (Phosphatidylinositol 5-Phosphate 4-Kinase) (PI5P4Kalpha) (Phosphatidylinositol 5-phosphate 4-kinase type II alpha) (PI(5)P 4-kinase type II alpha) (PIP4KII-alpha) (PtdIns(4)P-5-kinase B isoform) (PtdIns(4)P-5-kinase C isoform) …	7775	6478	5886	10856	8713	10454	10028	10511	9650	14441	2437	2857	2632	2016	2230	0	0	0	0	0
CRP_HUMAN	C-reactive protein [Cleaved into: C-reactive protein(1-205)]	7773	1875	1683	2590	2817	1004	1538	1444	1004	1927	9209	24057	8630	13050	8321	0	0	0	0	0
IQGA1_HUMAN	Ras GTPase-activating-like protein IQGAP1 (p195)	7758	5501	4142	10761	10568	6395	4261	4150	6181	4523	2693	2451	2428	2957	2521	0	0	0	0	0
FA7_BOVIN	Coagulation factor VII (EC 3.4.21.21) (Serum prothrombin conversion accelerator) [Cleaved into: Factor VII light chain; Factor VII heavy chain]	7733	6581	5562	7513	6086	8645	10899	10229	7611	12612	0	0	0	0	0	3731	3025	3065	2483	2694
LIPC_BOVIN	Hepatic triacylglycerol lipase (HL) (Hepatic lipase) (EC 3.1.1.3) (Lipase member C) (Lysophospholipase) (EC 3.1.1.5) (Phospholipase A1) (EC 3.1.1.32)	7681	10117	9264	10970	10584	15549	12159	14971	16176	16091	0	0	0	0	0	3881	1353	2381	1392	2486
EMAL2_HUMAN	Echinoderm microtubule-associated protein-like 2 (EMAP-2) (HuEMAP-2)	7673	6966	5111	8680	6486	24584	25429	23773	28902	30239	2003	2148	1949	1885	1800	0	0	0	0	0
CD36_HUMAN	Platelet glycoprotein 4 (Fatty acid translocase) (FAT) (Glycoprotein IIIb) (GPIIIB) (Leukocyte differentiation antigen CD36) (PAS IV) (PAS-4) (Platelet collagen receptor) (Platelet glycoprotein IV) (GPIV) (Thrombospondin receptor) (CD antigen CD36)	7648	5702	3424	10158	9103	3836	3725	4302	4301	5311	18233	35125	33543	41360	23597	0	0	0	0	0
ASM_BOVIN	Sphingomyelin phosphodiesterase (EC 3.1.4.12) (EC 3.1.4.3) (Acid sphingomyelinase) (aSMase) [Cleaved into: Sphingomyelin phosphodiesterase, processed form]	7630	8015	7009	6986	5663	7353	8370	9820	8714	8612	0	0	0	0	0	934	780	761	993	1087
GPX3_BOVIN	Glutathione peroxidase 3 (GPx-3) (GSHPx-3) (EC 1.11.1.9) (Plasma glutathione peroxidase) (GPx-P) (GSHPx-P)	7540	7037	5246	6641	6677	8583	12773	8934	10872	13276	0	0	0	0	0	1040	1238	7847	9656	1779
CADH1_BOVIN	Cadherin-1 (Epithelial cadherin) (E-cadherin) (CD antigen CD324) [Cleaved into: E-Cad/CTF1; E-Cad/CTF2; E-Cad/CTF3]	7464	8072	7023	8251	9232	9657	10177	8108	8027	10362	0	0	0	0	0	1048	3116	102605	65407	106180
COL11_BOVIN	Collectin-11 (Collectin kidney protein 1) (CL-K1)	7426	7584	7155	7641	6800	6192	7112	8858	6645	7675	0	0	0	0	0	1650	2119	18611	16781	15438
C1S_HUMAN	Complement C1s subcomponent (EC 3.4.21.42) (C1 esterase) (Complement component 1 subcomponent s) [Cleaved into: Complement C1s subcomponent heavy chain; Complement C1s subcomponent light chain]	7333	4045	3285	5137	4457	2176	1851	3198	1989	2824	47378	49280	59274	50755	55114	0	0	0	0	0
TRFL_HUMAN	Lactotransferrin (Lactoferrin) (EC 3.4.21.-) (Growth-inhibiting protein 12) (Talalactoferrin) [Cleaved into: Lactoferricin-H (Lfcin-H); Kaliocin-1; Lactoferroxin-A; Lactoferroxin-B; Lactoferroxin-C]	7315	7933	11312	9528	8672	9572	8326	9876	9251	9605	6730	7905	10200	8448	8355	0	0	0	0	0
ANXA1_BOVIN	Annexin A1 (Annexin I) (Annexin-1) (Calpactin II) (Calpactin-2) (Chromobindin-9) (Lipocortin I) (Phospholipase A2 inhibitory protein) (p35) [Cleaved into: Annexin Ac2-26]	7277	7519	4942	10091	10731	5652	6299	6204	5844	9067	0	0	0	0	0	3072	35549	64834	72788	36296
LRP1_HUMAN	Prolow-density lipoprotein receptor-related protein 1 (LRP-1) (Alpha-2-macroglobulin receptor) (A2MR) (Apolipoprotein E receptor) (APOER) (CD antigen CD91) [Cleaved into: Low-density lipoprotein receptor-related protein 1 85 kDa subunit (LRP-85); Low-density lipoprotein receptor-related protein 1 515 kDa subunit (LRP-515); Low-density lipoprotein receptor-related protein 1 intracellular domain (L…	7244	7117	6746	8848	6742	5939	5169	6940	7168	7068	6463	8418	7465	8834	5377	0	0	0	0	0
GSTA2_BOVIN	Glutathione S-transferase A2 (EC 2.5.1.18) (GST class-alpha member 2) (Glutathione S-transferase alpha-2)	7155	5694	2744	7252	9558	8745	10878	9062	8995	11359	0	0	0	0	0	1151	1544	57360	18814	71347
RCN3_BOVIN	Reticulocalbin-3	7101	8404	8104	5086	7464	8014	5180	5614	7272	7392	0	0	0	0	0	461	707	554	744	810
HV315_HUMAN	Immunoglobulin heavy variable 3-15	7018	3760	1188	4817	5081	1490	1657	1406	1073	2056	11178	24002	23242	20259	10951	0	0	0	0	0
PEPD_HUMAN	Xaa-Pro dipeptidase (X-Pro dipeptidase) (EC 3.4.13.9) (Imidodipeptidase) (Peptidase D) (Proline dipeptidase) (Prolidase)	6948	7324	8178	6229	5935	7955	6754	9480	9153	8777	837	1289	1432	1337	1455	0	0	0	0	0
MBL2_BOVIN	Mannose-binding protein C (MBP-C) (Mannan-binding protein)	6923	7430	7957	7318	5662	7542	7803	7419	9710	8660	0	0	0	0	0	1145	1339	784	702	651
TSP4_BOVIN	Thrombospondin-4	6917	8390	6518	9283	7311	6420	4496	6422	6819	6922	0	0	0	0	0	1783	1736	3140	2563	3212
SODC_BOVIN	Superoxide dismutase [Cu-Zn] (EC 1.15.1.1)	6839	6611	7187	6530	5384	7474	6180	7712	9242	7410	0	0	0	0	0	699	675	649	555	542
AGRE5_BOVIN	Adhesion G protein-coupled receptor E5 (Leukocyte antigen CD97) (CD antigen CD97) [Cleaved into: Adhesion G protein-coupled receptor E5 subunit alpha; Adhesion G protein-coupled receptor E5 subunit beta]	6825	6586	6940	8508	4886	9880	10511	11602	10968	12243	0	0	0	0	0	1403	1264	1421	1231	1919
CASA1_BOVIN	Alpha-S1-casein (allergen Bos d 8) [Cleaved into: Antioxidant peptide]	6720	10029	9500	9019	25692	9525	6416	10658	6229	12480	0	0	0	0	0	461753	598565	799560	1277589	694051
CPN2_HUMAN	Carboxypeptidase N subunit 2 (Carboxypeptidase N 83 kDa chain) (Carboxypeptidase N large subunit) (Carboxypeptidase N polypeptide 2) (Carboxypeptidase N regulatory subunit)	6717	2923	2267	3772	3718	1097	2018	1721	1720	1428	15222	16259	21801	15504	23865	0	0	0	0	0
PRDX6_HUMAN	Peroxiredoxin-6 (EC 1.11.1.27) (1-Cys peroxiredoxin) (1-Cys PRX) (24 kDa protein) (Acidic calcium-independent phospholipase A2) (aiPLA2) (EC 3.1.1.4) (Antioxidant protein 2) (Glutathione-dependent peroxiredoxin) (Liver 2D page spot 40) (Lysophosphatidylcholine acyltransferase 5) (LPC acyltransferase 5) (LPCAT-5) (Lyso-PC acyltransferase 5) (EC 2.3.1.23) (Non-selenium glutathione peroxidase) (NSGP…	6601	6373	6242	9309	9577	7152	6608	8391	6747	8650	14829	11368	10412	9488	12589	0	0	0	0	0
PUR9_BOVIN	Bifunctional purine biosynthesis protein ATIC (AICAR transformylase/inosine monophosphate cyclohydrolase) (ATIC) [Includes: Phosphoribosylaminoimidazolecarboxamide formyltransferase (EC 2.1.2.3) (5-aminoimidazole-4-carboxamide ribonucleotide formyltransferase) (AICAR formyltransferase) (AICAR transformylase); Inosine 5'-monophosphate cyclohydrolase (IMP cyclohydrolase) (EC 3.5.4.10) (IMP synthase…	6541	5060	3271	7034	5158	10811	20562	16171	14363	18593	0	0	0	0	0	11198	6534	53766	165785	24019
ASSY_BOVIN	Argininosuccinate synthase (EC 6.3.4.5) (Citrulline--aspartate ligase)	6497	5883	5154	8593	6482	12154	14610	10329	10447	14884	0	0	0	0	0	1375	2471	68324	17399	57148
RAB10_HUMAN	Ras-related protein Rab-10 (EC 3.6.5.2)	6469	4286	3403	11872	8079	8906	6863	8141	7767	8208	8374	9780	10252	6816	8218	0	0	0	0	0
HLAA_HUMAN	HLA class I histocompatibility antigen, A alpha chain (Human leukocyte antigen A) (HLA-A)	6432	5024	2697	8563	4224	1763	6665	991	2575	3041	13311	7663	12183	13549	5740	0	0	0	0	0
MDHC_HUMAN	CAP-Gly domain-containing linker protein 1 (Cytoplasmic linker protein 1) (Cytoplasmic linker protein 170 alpha-2) (CLIP-170) (Reed-Sternberg intermediate filament-associated protein) (Restin)	6425	2950	2390	1561	1107	1835	3964	3731	2768	4101	11444	15141	13916	15424	7341	0	0	0	0	0
C1R_HUMAN	Complement C1r subcomponent (EC 3.4.21.41) (Complement component 1 subcomponent r) [Cleaved into: Complement C1r subcomponent heavy chain; Complement C1r subcomponent light chain]	6407	4532	4670	5723	4960	3621	3721	3805	3931	3284	35972	39509	44091	41682	67156	0	0	0	0	0
CD109_HUMAN	CD109 antigen (150 kDa TGF-beta-1-binding protein) (C3 and PZP-like alpha-2-macroglobulin domain-containing protein 7) (Platelet-specific Gov antigen) (p180) (r150) (CD antigen CD109)	6375	7560	5674	7140	7738	7808	8782	9101	10056	7414	2889	2509	2498	2335	2682	0	0	0	0	0
ZA2G_BOVIN	Zinc-alpha-2-glycoprotein (Zn-alpha-2-GP) (Zn-alpha-2-glycoprotein)	6323	6271	6129	4038	4891	7080	3961	8505	6582	5918	0	0	0	0	0	862	723	784	606	784
THIC_HUMAN	Acetyl-CoA acetyltransferase, cytosolic (EC 2.3.1.9) (Acetyl-CoA transferase-like protein) (Cytosolic acetoacetyl-CoA thiolase)	6314	7109	6220	7920	6005	8738	14031	11910	12632	13262	1912	1902	2279	2015	2280	0	0	0	0	0
THBG_HUMAN	Thyroxine-binding globulin (Serpin A7) (T4-binding globulin)	6310	4546	4207	4470	5114	5019	3053	5399	3167	3661	3810	3957	5903	5760	8104	0	0	0	0	0
HLAB_HUMAN	HLA class I histocompatibility antigen, B alpha chain (Human leukocyte antigen B) (HLA-B)	6277	6518	3354	9190	6220	3920	6217	4759	4246	9069	31468	41960	40043	39484	18542	0	0	0	0	0
LDHA_HUMAN	L-lactate dehydrogenase A chain (LDH-A) (EC 1.1.1.27) (Cell proliferation-inducing gene 19 protein) (LDH muscle subunit) (LDH-M) (Renal carcinoma antigen NY-REN-59)	6258	5016	4076	10780	13888	5336	6813	5125	5154	7884	31654	34965	36538	35409	22039	0	0	0	0	0
RHOG_HUMAN	Rho-related GTP-binding protein RhoG	6218	2293	4261	6090	5950	4674	6620	5021	5714	5215	11592	9669	8581	11047	6185	0	0	0	0	0
SORCN_HUMAN	Sorcin (22 kDa protein) (CP-22) (CP22) (V19)	6139	5106	5095	10528	6751	4985	8629	4987	5270	8576	11650	11177	12164	7560	12432	0	0	0	0	0
SBP1_BOVIN	Methanethiol oxidase (MTO) (EC 1.8.3.4) (56 kDa selenium-binding protein) (SBP56) (SP56) (Selenium-binding protein 1)	6107	1874	1320	1074	982	978	3988	2165	3218	1241	0	0	0	0	0	665	894	894	1690	691
ADK_HUMAN	Adenosine kinase (AK) (EC 2.7.1.20) (Adenosine 5'-phosphotransferase)	6097	6869	4702	5531	4288	5836	13344	9427	9547	13304	1775	2153	2121	2047	2086	0	0	0	0	0
SERPH_BOVIN	Serpin H1 (Collagen-binding protein) (Colligin)	6052	8235	6532	8727	3915	9133	9054	9033	8832	14915	0	0	0	0	0	65724	3127	2027	2383	27783
CA2D1_HUMAN	Voltage-dependent calcium channel subunit alpha-2/delta-1 (Voltage-gated calcium channel subunit alpha-2/delta-1) [Cleaved into: Voltage-dependent calcium channel subunit alpha-2-1; Voltage-dependent calcium channel subunit delta-1]	6043	6139	6579	6779	4121	6951	5320	8565	9428	7946	620	881	1209	1029	875	0	0	0	0	0
GTR3_BOVIN	Solute carrier family 2, facilitated glucose transporter member 3 (Glucose transporter type 3, brain) (GLUT-3)	5983	3205	2836	8126	5150	2583	3845	3460	2468	4329	0	0	0	0	0	881	1016	27867	462	790
PRDX2_HUMAN	Peroxiredoxin-2 (EC 1.11.1.24) (Natural killer cell-enhancing factor B) (NKEF-B) (PRP) (Thiol-specific antioxidant protein) (TSA) (Thioredoxin peroxidase 1) (Thioredoxin-dependent peroxide reductase 1) (Thioredoxin-dependent peroxiredoxin 2)	5746	3932	3033	7318	6309	2723	5351	3853	3486	5888	30618	31468	31722	27985	24762	0	0	0	0	0
TFG_HUMAN	Protein TFG (TRK-fused gene protein)	5744	5331	3495	8766	3499	4617	3143	5968	3716	4293	1342	4445	1841	1083	3350	0	0	0	0	0
FA12_HUMAN	Coagulation factor XII (EC 3.4.21.38) (Hageman factor) (HAF) [Cleaved into: Coagulation factor XIIa heavy chain; Beta-factor XIIa part 1; Coagulation factor XIIa light chain (Beta-factor XIIa part 2)]	5740	5276	4096	5285	5426	3570	4225	4380	4250	4238	54569	49411	40033	56848	84063	0	0	0	0	0
KAIN_HUMAN	Kallistatin (Kallikrein inhibitor) (Peptidase inhibitor 4) (PI-4) (Serpin A4)	5714	2807	2339	4483	5284	1953	1265	2230	1741	1835	21061	17950	23711	24104	25647	0	0	0	0	0
MFGM_HUMAN	Lactadherin (Breast epithelial antigen BA46) (HMFG) (MFGM) (Milk fat globule-EGF factor 8) (MFG-E8) (SED1) [Cleaved into: Lactadherin short form; Medin]	5695	5230	2378	5830	4539	3199	3787	3708	2735	4066	15621	18297	21278	23881	13116	0	0	0	0	0
PBLD_BOVIN	Phenazine biosynthesis-like domain-containing protein (EC 5.1.-.-)	5577	5897	4448	5162	4697	5460	8306	5000	7058	7529	0	0	0	0	0	13330	4465	21914	66695	23160
AL9A1_BOVIN	4-trimethylaminobutyraldehyde dehydrogenase (TMABA-DH) (TMABADH) (EC 1.2.1.47) (Aldehyde dehydrogenase family 9 member A1) (EC 1.2.1.3)	5567	5231	5161	6711	7253	7704	10918	8166	10177	13866	0	0	0	0	0	4008	6798	105192	11508	99711
SEPP1_BOVIN	Selenoprotein P (SeP) (Selenoprotein P-like protein)	5428	4375	2548	2204	2617	6957	30386	9000	4787	19646	0	0	0	0	0	2502	2604	59901	32695	96670
CAP1_BOVIN	Adenylyl cyclase-associated protein 1 (CAP 1)	5412	6819	4224	4505	3300	3696	6016	4580	5630	7890	0	0	0	0	0	2888	3002	27848	5021	23400
K1H1_HUMAN	Keratin, type I cuticular Ha1 (Hair keratin, type I Ha1) (Keratin-31) (K31)	5395	3181	3375	2865	4919	3553	19394	3696	3018	3741	3783	4554	3192	3100	18329	0	0	0	0	0
LV657_HUMAN	Immunoglobulin lambda variable 6-57 (Ig lambda chain V-VI region AR) (Ig lambda chain V-VI region EB4) (Ig lambda chain V-VI region NIG-48) (Ig lambda chain V-VI region SUT) (Ig lambda chain V-VI region WLT)	5371	1844	1145	3337	2350	1390	484	2510	924	649	10689	9654	16707	10117	13252	0	0	0	0	0
GDIB_BOVIN	Rab GDP dissociation inhibitor beta (Rab GDI beta) (Guanosine diphosphate dissociation inhibitor 2) (GDI-2)	5353	5135	6437	5101	5031	8876	8558	8420	9518	8491	0	0	0	0	0	489	722	664	529	608
CO1A1_BOVIN	Collagen alpha-1(I) chain (Alpha-1 type I collagen)	5347	4741	5129	3575	1736	2795	5291	4014	1749	5371	0	0	0	0	0	1637	3454	2675	3125	7637
MA2B1_BOVIN	Lysosomal alpha-mannosidase (Laman) (EC 3.2.1.24) (Lysosomal acid alpha-mannosidase) (Mannosidase alpha class 2B member 1) (Mannosidase alpha-B) [Cleaved into: Lysosomal alpha-mannosidase A peptide; Lysosomal alpha-mannosidase B peptide; Lysosomal alpha-mannosidase C peptide; Lysosomal alpha-mannosidase D peptide; Lysosomal alpha-mannosidase E peptide]	5324	5643	6404	5502	5330	7211	6560	8117	8075	6818	0	0	0	0	0	1204	1036	1342	1130	778
PCD12_HUMAN	Protocadherin-12 (Vascular cadherin-2) (Vascular endothelial cadherin-2) (VE-cad-2) (VE-cadherin-2) [Cleaved into: Protocadherin-12, secreted form]	5305	5825	4995	4734	4282	5355	4577	5202	3928	4741	873	949	807	1172	481	0	0	0	0	0
GAPR1_HUMAN	Golgi-associated plant pathogenesis-related protein 1 (GAPR-1) (Golgi-associated PR-1 protein) (Glioma pathogenesis-related protein 2) (GliPR 2)	5291	4151	3666	7339	5656	7716	8608	10198	10109	12353	11720	10082	10582	11904	4375	0	0	0	0	0
HV338_HUMAN	Probable non-functional immunoglobulin heavy variable 3-38	5238	3675	2511	5035	3814	1753	2278	2399	2088	2097	14884	6722	14953	14121	12485	0	0	0	0	0
HV372_HUMAN	Immunoglobulin heavy variable 3-72	5217	2982	2090	3411	3108	991	2314	1058	1597	1926	18954	22630	23392	24620	22028	0	0	0	0	0
COMT_BOVIN	Catechol O-methyltransferase (EC 2.1.1.6)	5212	4358	3558	3345	3524	5201	12298	13676	6310	19212	0	0	0	0	0	2109	2494	4907	26321	2730
TETN_HUMAN	Tetranectin (TN) (C-type lectin domain family 3 member B) (Plasminogen kringle 4-binding protein)	5190	3864	1813	3654	2983	1134	857	2255	528	1479	6585	3774	6045	3712	9929	0	0	0	0	0
LV218_HUMAN	Immunoglobulin lambda variable 2-18	5107	1274	1762	3956	2742	1214	690	2018	900	1259	11966	16348	17188	12287	14504	0	0	0	0	0
PTX3_BOVIN	Pentraxin-related protein PTX3 (Pentaxin-related protein PTX3)	5069	4956	5430	4908	4231	4794	4679	6049	5133	3971	0	0	0	0	0	582	1171	752	701	540
GSTP1_BOVIN	Glutathione S-transferase P (EC 2.5.1.18) (GST class-pi)	5066	6409	6261	6955	6700	12215	13475	11584	15370	14430	0	0	0	0	0	1475	1587	3879	2019	4557
HA1B_BOVIN	BOLA class I histocompatibility antigen, alpha chain BL3-7	5065	4672	3673	7748	6146	4320	4858	3692	4781	8731	0	0	0	0	0	2171	2650	82743	66538	61689
DHSO_BOVIN	Sorbitol dehydrogenase (SDH) (EC 1.1.1.-) (L-iditol 2-dehydrogenase) (EC 1.1.1.14) (Polyol dehydrogenase) (Xylitol dehydrogenase) (XDH) (EC 1.1.1.9)	5045	6747	3837	3306	2805	7867	11304	8279	12280	10062	0	0	0	0	0	3491	3606	59813	46256	86760
MOES_HUMAN	Moesin (Membrane-organizing extension spike protein)	4982	6047	3285	10978	9391	4135	4364	5174	4938	5972	40265	45018	37898	45778	24470	0	0	0	0	0
PHLD_HUMAN	Phosphatidylinositol-glycan-specific phospholipase D (PI-G PLD) (EC 3.1.4.50) (Glycoprotein phospholipase D) (Glycosyl-phosphatidylinositol-specific phospholipase D) (GPI-PLD) (GPI-specific phospholipase D)	4976	2077	1776	3087	1779	1443	2089	1808	1908	1336	13849	17517	16915	14013	14896	0	0	0	0	0
C1QA_HUMAN	Complement C1q subcomponent subunit A	4967	3818	1865	4645	5777	1631	1657	1819	1598	1629	11254	45756	27181	50562	28901	0	0	0	0	0
G6PI_BOVIN	Glucose-6-phosphate isomerase (GPI) (EC 5.3.1.9) (Autocrine motility factor) (AMF) (Neuroleukin) (NLK) (Phosphoglucose isomerase) (PGI) (Phosphohexose isomerase) (PHI)	4962	5568	4890	5307	4484	6811	5788	7314	7392	6892	0	0	0	0	0	1006	1086	1075	1170	940
SERA_BOVIN	D-3-phosphoglycerate dehydrogenase (3-PGDH) (EC 1.1.1.95) (2-oxoglutarate reductase) (EC 1.1.1.399) (Malate dehydrogenase) (EC 1.1.1.37)	4826	4371	2913	4741	4333	5584	17577	10874	10157	16999	0	0	0	0	0	29601	18141	184176	216463	266003
MTAP_BOVIN	S-methyl-5'-thioadenosine phosphorylase (EC 2.4.2.28) (5'-methylthioadenosine phosphorylase) (MTA phosphorylase) (MTAP) (MTAPase)	4814	6503	4433	8556	2692	3770	9168	3930	6776	3971	0	0	0	0	0	2642	3989	29561	6715	86373
CDSN_HUMAN	Retinol-binding protein 4 (Plasma retinol-binding protein) (PRBP) (RBP) [Cleaved into: Plasma retinol-binding protein(1-182); Plasma retinol-binding protein(1-181); Plasma retinol-binding protein(1-179); Plasma retinol-binding protein(1-176)]	4767	4641	5038	1535	1024	1212	2257	1273	823	1744	1155	3794	1268	10802	40102	0	0	0	0	0
NP1L4_BOVIN	Nucleosome assembly protein 1-like 4	4715	3782	3602	5351	4501	11507	15025	13434	11680	18725	0	0	0	0	0	416	692	1155	8988	893
ANXA1_HUMAN	Annexin A1 (Annexin I) (Annexin-1) (Calpactin II) (Calpactin-2) (Chromobindin-9) (Lipocortin I) (Phospholipase A2 inhibitory protein) (p35) [Cleaved into: Annexin Ac2-26]	4706	4910	2706	6837	8475	3777	5252	2872	3531	6009	20124	21841	19275	20977	10768	0	0	0	0	0
PAFA_BOVIN	Platelet-activating factor acetylhydrolase (PAF acetylhydrolase) (EC 3.1.1.47) (1-alkyl-2-acetylglycerophosphocholine esterase) (2-acetyl-1-alkylglycerophosphocholine esterase) (LDL-associated phospholipase A2) (LDL-PLA(2)) (PAF 2-acylhydrolase)	4681	4466	3730	4291	3341	5268	5576	6960	6302	5216	0	0	0	0	0	1820	1801	1211	1116	934
PYGB_BOVIN	Glycogen phosphorylase, brain form (EC 2.4.1.1)	4652	3039	4038	5996	5096	6631	5102	8143	8181	6873	0	0	0	0	0	1110	1345	2520	508	2457
LDHB_HUMAN	L-lactate dehydrogenase B chain (LDH-B) (EC 1.1.1.27) (LDH heart subunit) (LDH-H) (Renal carcinoma antigen NY-REN-46)	4626	4514	4732	6494	4746	3059	3996	3151	3869	3765	27186	25206	30735	26903	15160	0	0	0	0	0
NOTC3_HUMAN	Neurogenic locus notch homolog protein 3 (Notch 3) [Cleaved into: Notch 3 extracellular truncation; Notch 3 intracellular domain]	4604	3965	2345	4404	1920	2966	6116	4642	3570	6883	1684	1138	821	904	967	0	0	0	0	0
LAMB1_HUMAN	Laminin subunit beta-1 (Laminin B1 chain) (Laminin-1 subunit beta) (Laminin-10 subunit beta) (Laminin-12 subunit beta) (Laminin-2 subunit beta) (Laminin-6 subunit beta) (Laminin-8 subunit beta)	4600	4493	3878	4928	2621	6058	4906	3641	4738	4879	811	825	723	669	692	0	0	0	0	0
SAA2_HUMAN	Septin-9 (MLL septin-like fusion protein MSF-A) (MLL septin-like fusion protein) (Ovarian/Breast septin) (Ov/Br septin) (Septin D1)	4580	1858	1150	2290	930	941	1049	678	1087	710	25096	18357	21642	17290	15225	0	0	0	0	0
NSF_HUMAN	Vesicle-fusing ATPase (EC 3.6.4.6) (N-ethylmaleimide-sensitive fusion protein) (NEM-sensitive fusion protein) (Vesicular-fusion protein NSF)	4566	4309	1831	2436	3367	4132	2724	3124	3142	4686	723	1194	574	1387	1335	0	0	0	0	0
F16P1_BOVIN	Fructose-1,6-bisphosphatase 1 (FBPase 1) (EC 3.1.3.11) (D-fructose-1,6-bisphosphate 1-phosphohydrolase 1) (Liver FBPase)	4559	4827	1060	4996	5698	7012	9187	8366	6743	11223	0	0	0	0	0	978	1207	17656	1973	5991
CAMP_HUMAN	Cathelicidin antimicrobial peptide (18 kDa cationic antimicrobial protein) (CAP-18) (hCAP-18) [Cleaved into: Antibacterial peptide FALL-39 (FALL-39 peptide antibiotic); Antibacterial peptide LL-37; Antibacterial peptide KR-20; Antibacterial peptide LL-23; Antibacterial peptide LL-29; Antibacterial peptide KS-30; Antibacterial peptide RK-31; Antibacterial peptide FF-33]	4551	4352	5081	6607	7117	4867	4143	6014	4263	5925	69919	60748	60715	68458	84394	0	0	0	0	0
MYL9_HUMAN	Myosin regulatory light polypeptide 9 (20 kDa myosin light chain) (LC20) (MLC-2C) (Myosin RLC) (Myosin regulatory light chain 2, smooth muscle isoform) (Myosin regulatory light chain 9) (Myosin regulatory light chain MRLC1)	4537	3164	2125	4804	3461	1080	1256	2404	1970	2131	1221	883	928	810	589	0	0	0	0	0
VASP_BOVIN	Vasodilator-stimulated phosphoprotein (VASP)	4517	2253	2427	4905	2430	2175	3213	4398	2344	5309	0	0	0	0	0	1425	1816	44232	19967	47307
CAH1_HUMAN	Carbonic anhydrase 1 (EC 4.2.1.1) (Carbonate dehydratase I) (Carbonic anhydrase B) (CAB) (Carbonic anhydrase I) (CA-I) (Cyanamide hydratase CA1) (EC 4.2.1.69)	4513	3962	1932	5777	4783	2358	3146	2711	1548	3898	20110	21518	25770	25393	15297	0	0	0	0	0
ACOHC_BOVIN	Cytoplasmic aconitate hydratase (Aconitase) (EC 4.2.1.3) (Citrate hydro-lyase) (Iron-responsive element-binding protein 1) (IRE-BP 1)	4510	4005	2739	8706	9617	14071	19633	17759	19034	21669	0	0	0	0	0	2543	2121	10453	2263	3928
5MP2_HUMAN	eIF5-mimic protein 2 (Basic leucine zipper and W2 domain-containing protein 1) (Protein Orf)	4464	2843	2572	2948	4675	2952	5210	3428	4040	6740	2128	1679	1519	1681	2426	0	0	0	0	0
K1C17_HUMAN	Keratin, type I cytoskeletal 17 (39.1) (Cytokeratin-17) (CK-17) (Keratin-17) (K17)	4457	2805	6802	4178	4558	1978	7471	1938	2778	2080	29905	24169	14851	18703	18172	0	0	0	0	0
GPIX_HUMAN	Platelet glycoprotein IX (GP-IX) (GPIX) (Glycoprotein 9) (CD antigen CD42a)	4443	4526	2933	5725	3543	3582	3361	3698	2445	5079	21871	18869	18201	14742	17495	0	0	0	0	0
KCD12_HUMAN	BTB/POZ domain-containing protein KCTD12 (Pfetin) (Predominantly fetal expressed T1 domain)	4358	3921	2652	3483	3148	3713	3990	3858	4590	4554	9699	3422	2373	7233	3882	0	0	0	0	0
PLVAP_HUMAN	Plasmalemma vesicle-associated protein (Fenestrated endothelial-linked structure protein) (Plasmalemma vesicle protein 1) (PV-1)	4342	5164	3543	5116	4359	5160	5042	5167	5406	7511	1004	823	882	579	672	0	0	0	0	0
FA10_HUMAN	Coagulation factor X (EC 3.4.21.6) (Stuart factor) (Stuart-Prower factor) [Cleaved into: Factor X light chain; Factor X heavy chain; Activated factor Xa heavy chain]	4339	2299	1865	3656	2801	1180	1210	1296	1249	1250	24199	16042	19137	16551	21621	0	0	0	0	0
CADH1_HUMAN	Cadherin-1 (CAM 120/80) (Epithelial cadherin) (E-cadherin) (Uvomorulin) (CD antigen CD324) [Cleaved into: E-Cad/CTF1; E-Cad/CTF2; E-Cad/CTF3]	4300	3314	2644	4499	6436	2422	3051	2980	1826	3442	126872	99479	104429	112213	95282	0	0	0	0	0
ILEU_BOVIN	Leukocyte elastase inhibitor (LEI) (Serpin B1)	4285	4622	5329	4068	4382	4961	4852	5227	6304	4956	0	0	0	0	0	833	849	825	882	757
6PGD_HUMAN	6-phosphogluconate dehydrogenase, decarboxylating (EC 1.1.1.44)	4272	4424	3109	4370	4307	5407	7513	7027	6803	10705	2310	1995	2286	1783	2376	0	0	0	0	0
PON3_HUMAN	Lysozyme C (EC 3.2.1.17) (1,4-beta-N-acetylmuramidase C)	4261	779	850	2673	911	860	554	911	998	864	14944	13934	14442	12615	9036	0	0	0	0	0
PUR6_HUMAN	Bifunctional phosphoribosylaminoimidazole carboxylase/phosphoribosylaminoimidazole succinocarboxamide synthetase (PAICS) [Includes: Phosphoribosylaminoimidazole carboxylase (EC 4.1.1.21) (AIR carboxylase) (AIRC); Phosphoribosylaminoimidazole succinocarboxamide synthetase (EC 6.3.2.6) (SAICAR synthetase)]	4258	1027	1035	2923	1388	1206	698	1270	1980	1175	755	541	772	827	1049	0	0	0	0	0
PIGR_HUMAN	Polymeric immunoglobulin receptor (PIgR) (Poly-Ig receptor) (Hepatocellular carcinoma-associated protein TB6) [Cleaved into: Secretory component]	4211	3268	2126	4419	4213	1040	1875	1659	1646	2400	24212	25561	27234	23795	14303	0	0	0	0	0
CO5A1_HUMAN	Collagen alpha-1(V) chain	4166	5619	6264	5632	2352	5369	5718	6176	6436	5051	1187	1265	1004	1013	990	0	0	0	0	0
CD9_HUMAN	CD9 antigen (5H9 antigen) (Cell growth-inhibiting gene 2 protein) (Leukocyte antigen MIC3) (Motility-related protein) (MRP-1) (Tetraspanin-29) (Tspan-29) (p24) (CD antigen CD9)	4129	2893	2147	6305	5404	2349	3007	2330	2082	4105	20800	19924	20125	26340	13506	0	0	0	0	0
ITA6_HUMAN	Integrin alpha-6 (CD49 antigen-like family member F) (VLA-6) (CD antigen CD49f) [Cleaved into: Integrin alpha-6 heavy chain; Integrin alpha-6 light chain; Processed integrin alpha-6 (Alpha6p)]	4103	3945	1761	4771	3371	2949	2478	3118	2146	3613	12414	16294	14004	15926	11662	0	0	0	0	0
EF2_BOVIN	Elongation factor 2 (EF-2)	4095	2485	1857	4928	2170	6612	2388	6621	6002	7756	0	0	0	0	0	2121	2872	3394	2149	1573
HSPB1_BOVIN	Heat shock protein beta-1 (HspB1) (Heat shock 27 kDa protein) (HSP 27)	4081	3913	1774	1931	4035	5028	12031	11954	11047	13534	0	0	0	0	0	1251	1028	44886	1706	41604
DPYL2_BOVIN	Dihydropyrimidinase-related protein 2 (DRP-2) (Neural-specific protein NSP60)	4063	3624	2250	2531	3796	3570	5180	3709	4172	5593	0	0	0	0	0	1381	1516	4476	4100	4308
LIMS1_HUMAN	LIM and senescent cell antigen-like-containing domain protein 1 (Particularly interesting new Cys-His protein 1) (PINCH-1) (Renal carcinoma antigen NY-REN-48)	4025	3180	1785	3620	2463	3028	6761	2875	5292	4476	3561	2230	2491	2662	2550	0	0	0	0	0
S10AB_HUMAN	Protein S100-A11 (Calgizzarin) (Metastatic lymph node gene 70 protein) (MLN 70) (Protein S100-C) (S100 calcium-binding protein A11) [Cleaved into: Protein S100-A11, N-terminally processed]	3977	2838	2474	7162	1865	1090	4075	1339	4491	5173	10910	11139	10565	4460	9795	0	0	0	0	0
PEDF_HUMAN	C-type mannose receptor 2 (C-type lectin domain family 13 member E) (Endocytic receptor 180) (Macrophage mannose receptor 2) (Urokinase-type plasminogen activator receptor-associated protein) (UPAR-associated protein) (Urokinase receptor-associated protein) (CD antigen CD280)	3963	1447	1123	1674	1064	1238	683	1265	614	1114	3950	4755	4055	3536	10010	0	0	0	0	0
FHL1_HUMAN	Four and a half LIM domains protein 1 (FHL-1) (Skeletal muscle LIM-protein 1) (SLIM) (SLIM-1)	3955	3066	2004	2982	1671	2254	5911	2099	2012	4545	634	590	541	518	826	0	0	0	0	0
HSP74_HUMAN	Heat shock 70 kDa protein 4 (HSP70RY) (Heat shock 70-related protein APG-2)	3916	2146	1213	3033	3090	6323	4778	2549	2228	5453	641	1132	968	1091	1068	0	0	0	0	0
COR1A_HUMAN	Coronin-1A (Coronin-like protein A) (Clipin-A) (Coronin-like protein p57) (Tryptophan aspartate-containing coat protein) (TACO)	3848	3606	2953	3106	2391	1922	3429	1961	3295	2592	4254	4004	4146	5359	6831	0	0	0	0	0
FNBP1_HUMAN	Formin-binding protein 1 (Formin-binding protein 17) (hFBP17)	3817	3174	2343	4498	3591	3558	3738	2579	2999	4481	443	432	553	869	754	0	0	0	0	0
SAP_BOVIN	Prosaposin (Proactivator polypeptide) [Cleaved into: Saposin-A (Protein A); Saposin-B (Cerebroside sulfate activator) (CSAct) (Dispersin) (Sphingolipid activator protein 1) (SAP-1) (Sulfatide/GM1 activator); Saposin-C (A1 activator) (Co-beta-glucosidase) (Glucosylceramidase activator) (Sphingolipid activator protein 2) (SAP-2); Saposin-D (Component C) (Protein C)]	3789	8203	5638	3775	3437	5391	4232	6094	5902	2083	0	0	0	0	0	1148	997	1293	904	3091
KV116_HUMAN	Immunoglobulin kappa variable 1-16 (Ig kappa chain V-I region BAN)	3739	1590	2221	2425	1750	1340	919	1079	875	1579	11184	9078	13464	14520	12338	0	0	0	0	0
DCTN2_BOVIN	Dynactin subunit 2	3730	4652	2183	5150	3663	19580	28676	21811	14578	34697	0	0	0	0	0	2752	1199	1131	1571	6883
STXB2_HUMAN	Syntaxin-binding protein 2 (Protein unc-18 homolog 2) (Unc18-2) (Protein unc-18 homolog B) (Unc-18B)	3715	3370	2244	4169	3738	3219	5005	4296	3455	4963	1624	2866	3371	2026	3012	0	0	0	0	0
SAMP_BOVIN	Serum amyloid P-component (SAP)	3711	3411	2727	3315	3434	2984	3521	2876	2981	3088	0	0	0	0	0	906	887	903	1015	1288
K2C7_HUMAN	Keratin, type II cytoskeletal 7 (Cytokeratin-7) (CK-7) (Keratin-7) (K7) (Sarcolectin) (Type-II keratin Kb7)	3701	2677	2408	3795	5677	2936	4146	2880	1963	3851	11967	15293	10871	13483	4666	0	0	0	0	0
ARY1_BOVIN	Arylamine N-acetyltransferase 1 (EC 2.3.1.5) (Arylamide acetylase 1) (N-acetyltransferase type 1) (NAT-1)	3698	3438	1693	2466	3373	5718	10011	7627	5114	9140	0	0	0	0	0	1402	892	1586	657	1499
FCN3_HUMAN	Ficolin-3 (Collagen/fibrinogen domain-containing lectin 3 p35) (Collagen/fibrinogen domain-containing protein 3) (Hakata antigen)	3687	1885	1526	2600	2234	1678	1202	1811	1255	1387	20359	17926	22809	14571	19480	0	0	0	0	0
IF5_HUMAN	Eukaryotic translation initiation factor 5 (eIF-5)	3645	1596	1241	3041	3083	2100	894	978	1199	1765	2242	1882	1849	1843	1769	0	0	0	0	0
PGM1_BOVIN	Phosphoglucomutase-1 (PGM 1) (EC 5.4.2.2) (Glucose phosphomutase 1)	3603	4945	4083	6509	5424	17608	31182	27276	31093	37408	0	0	0	0	0	2589	2662	2804	2657	3135
BPIA1_BOVIN	BPI fold-containing family A member 1 (Palate lung and nasal epithelium clone protein)	3583	3495	2087	3375	5872	10592	28781	13681	16598	23768	0	0	0	0	0	1861	2733	2404	2155	5100
K2C6A_HUMAN	Keratin, type II cytoskeletal 6A (Cytokeratin-6A) (CK-6A) (Cytokeratin-6D) (CK-6D) (Keratin-6A) (K6A) (Type-II keratin Kb6) (allergen Hom s 5)	3570	3597	2953	3143	6394	1989	2004	2107	3170	3527	21689	14504	16855	12531	6132	0	0	0	0	0
IMB1_HUMAN	Importin subunit beta-1 (Importin-90) (Karyopherin subunit beta-1) (Nuclear factor p97) (Pore targeting complex 97 kDa subunit) (PTAC97)	3559	3006	2478	3008	3429	8214	12218	9476	8894	12707	2475	2171	2106	1487	1741	0	0	0	0	0
BTD_HUMAN	CD59 glycoprotein (1F5 antigen) (20 kDa homologous restriction factor) (HRF-20) (HRF20) (MAC-inhibitory protein) (MAC-IP) (MEM43 antigen) (Membrane attack complex inhibition factor) (MACIF) (Membrane inhibitor of reactive lysis) (MIRL) (Protectin) (CD antigen CD59)	3558	1779	1177	1593	1301	711	1229	1356	1102	606	7026	558	7950	6424	8936	0	0	0	0	0
G6PD_HUMAN	Glucose-6-phosphate 1-dehydrogenase (G6PD) (EC 1.1.1.49)	3556	3187	2257	2545	2305	3588	4401	3859	3236	5296	2266	2196	2210	2223	1301	0	0	0	0	0
PGBM_HUMAN	Basement membrane-specific heparan sulfate proteoglycan core protein (HSPG) (Perlecan) (PLC) [Cleaved into: Endorepellin; LG3 peptide]	3539	4328	4386	4063	3774	3256	3829	4506	5217	3955	973	1046	834	933	851	0	0	0	0	0
CO6_BOVIN	Complement component C6	3536	4186	4425	4635	3048	6986	2988	5463	6867	5874	0	0	0	0	0	825	863	990	1192	763
ANXA4_BOVIN	Annexin A4 (35-beta calcimedin) (Annexin IV) (Annexin-4) (Carbohydrate-binding protein p33/p41) (Chromobindin-4) (Endonexin I) (Lipocortin IV) (P32.5) (PP4-X) (Placental anticoagulant protein II) (PAP-II) (Protein II)	3534	1422	4150	3546	3060	2335	1841	2120	1344	3960	0	0	0	0	0	645	738	565	1042	789
PARK7_BOVIN	Parkinson disease protein 7 homolog (Maillard deglycase) (Parkinsonism-associated deglycase) (Protein DJ-1) (DJ-1) (Protein/nucleic acid deglycase DJ-1) (EC 3.1.2.-, EC 3.5.1.-, EC 3.5.1.124)	3470	3562	3115	3752	2681	2799	3239	2945	4231	3889	0	0	0	0	0	597	596	653	714	1155
ANXA6_HUMAN	Annexin A6 (67 kDa calelectrin) (Annexin VI) (Annexin-6) (Calphobindin-II) (CPB-II) (Chromobindin-20) (Lipocortin VI) (Protein III) (p68) (p70)	3443	3242	2608	5702	4279	3124	3692	3615	3126	4102	16367	18603	20920	20370	11416	0	0	0	0	0
HPPD_BOVIN	4-hydroxyphenylpyruvate dioxygenase (EC 1.13.11.27) (4-hydroxyphenylpyruvic acid oxidase) (4HPPD) (HPD) (HPPDase)	3434	4591	4243	3739	2942	4621	3536	4037	5310	4330	0	0	0	0	0	419	404	498	700	836
ITIH3_HUMAN	Peptidyl-glycine alpha-amidating monooxygenase (PAM) [Includes: Peptidylglycine alpha-hydroxylating monooxygenase (PHM) (EC 1.14.17.3); Peptidyl-alpha-hydroxyglycine alpha-amidating lyase (EC 4.3.2.5) (Peptidylamidoglycolate lyase) (PAL)]	3434	1565	1126	2203	1273	567	927	805	870	551	5641	3454	8898	5562	8450	0	0	0	0	0
PIP_HUMAN	Prolactin-inducible protein (Gross cystic disease fluid protein 15) (GCDFP-15) (Prolactin-induced protein) (Secretory actin-binding protein) (SABP) (gp17)	3420	1919	2823	4236	3416	1721	3116	1913	1792	4353	3016	2619	3013	3830	15906	0	0	0	0	0
COTL1_HUMAN	Coactosin-like protein	3418	3956	6461	4127	6027	5009	4291	3134	7036	4415	11088	10095	12060	12289	4710	0	0	0	0	0
PRDX1_HUMAN	Peroxiredoxin-1 (EC 1.11.1.24) (Natural killer cell-enhancing factor A) (NKEF-A) (Proliferation-associated gene protein) (PAG) (Thioredoxin peroxidase 2) (Thioredoxin-dependent peroxide reductase 2) (Thioredoxin-dependent peroxiredoxin 1)	3413	2442	3170	4243	5464	1649	2718	2346	1182	2949	17802	1983	16393	18345	12460	0	0	0	0	0
PTK7_HUMAN	Inactive tyrosine-protein kinase 7 (Colon carcinoma kinase 4) (CCK-4) (Protein-tyrosine kinase 7) (Pseudo tyrosine kinase receptor 7) (Tyrosine-protein kinase-like 7)	3411	3213	3759	3234	2943	4096	2872	3434	4688	4131	660	558	588	651	901	0	0	0	0	0
CBR1_BOVIN	Carbonyl reductase [NADPH] 1 (EC 1.1.1.184) (15-hydroxyprostaglandin dehydrogenase [NADP(+)]) (EC 1.1.1.196, EC 1.1.1.197) (20-beta-hydroxysteroid dehydrogenase) (Alcohol dehydrogenase [NAD(P)+] CBR1) (EC 1.1.1.71) (NADPH-dependent carbonyl reductase 1) (Prostaglandin 9-ketoreductase) (PG-9-KR) (Prostaglandin-E(2) 9-reductase) (EC 1.1.1.189)	3410	4899	2776	4303	5053	5821	8022	7621	6806	10332	0	0	0	0	0	1101	3564	134401	132243	96363
ENPP2_BOVIN	Ectonucleotide pyrophosphatase/phosphodiesterase family member 2 (E-NPP 2) (EC 3.1.4.39) (Autotaxin) (Extracellular lysophospholipase D) (LysoPLD)	3372	3337	3484	2675	3142	3195	1698	2120	3658	1425	0	0	0	0	0	840	851	666	407	538
LV319_HUMAN	Immunoglobulin lambda variable 3-19 (Ig lambda chain V-III region SH)	3364	1817	1919	2345	1528	1142	814	1393	703	984	14227	10179	16118	11887	12872	0	0	0	0	0
IBP2_BOVIN	Insulin-like growth factor-binding protein 2 (IBP-2) (IGF-binding protein 2) (IGFBP-2)	3362	4254	5206	3955	4420	4241	8405	3907	2665	4447	0	0	0	0	0	147541	41248	626624	483343	1448757
COBA1_HUMAN	Collagen alpha-1(XI) chain	3362	3574	3096	2525	2453	3278	2922	3604	4472	3623	1086	1296	843	1094	781	0	0	0	0	0
ACE_HUMAN	Angiotensin-converting enzyme (ACE) (EC 3.4.15.1) (Dipeptidyl carboxypeptidase I) (Kininase II) (CD antigen CD143) [Cleaved into: Angiotensin-converting enzyme, soluble form]	3354	3163	3006	2557	2266	3062	2356	3412	3732	3050	1270	1765	1256	985	765	0	0	0	0	0
ALDOC_HUMAN	Fructose-bisphosphate aldolase C (EC 4.1.2.13) (Brain-type aldolase)	3306	3274	4396	3429	4753	3260	5010	4990	3755	4575	3120	1234	2602	1419	1241	0	0	0	0	0
K2C1B_HUMAN	Keratin, type II cytoskeletal 1b (Cytokeratin-1B) (CK-1B) (Keratin-77) (K77) (Type-II keratin Kb39)	3277	3831	3484	2677	3281	2575	3821	2582	4540	4821	4113	12273	3720	5292	10478	0	0	0	0	0
CO2_HUMAN	Complement C2 (EC 3.4.21.43) (C3/C5 convertase) [Cleaved into: Complement C2b fragment; Complement C2a fragment]	3266	1867	1497	2142	1908	1157	1528	1717	1265	1246	10875	10818	12668	9846	11602	0	0	0	0	0
IPSP_HUMAN	Plasma serine protease inhibitor (Acrosomal serine protease inhibitor) (Plasminogen activator inhibitor 3) (PAI-3) (PAI3) (Protein C inhibitor) (PCI) (Serpin A5)	3254	2565	2018	3207	2429	1417	1078	1552	969	1700	32857	18738	28406	37825	21582	0	0	0	0	0
MA2A1_HUMAN	Alpha-mannosidase 2 (EC 3.2.1.114) (Golgi alpha-mannosidase II) (AMan II) (Man II) (Mannosidase alpha class 2A member 1) (Mannosyl-oligosaccharide 1,3-1,6-alpha-mannosidase)	3244	3361	2546	4039	4228	3004	2683	3877	2620	2772	10386	14331	13829	18644	10759	0	0	0	0	0
HEM2_BOVIN	Delta-aminolevulinic acid dehydratase (ALADH) (EC 4.2.1.24) (Porphobilinogen synthase)	3233	2635	3642	2790	2074	4144	4644	4631	5174	4782	0	0	0	0	0	670	734	655	519	530
GPX1_BOVIN	Glutathione peroxidase 1 (GPx-1) (GSHPx-1) (EC 1.11.1.9) (Cellular glutathione peroxidase)	3215	2580	2759	2657	1660	3126	5329	3277	3101	5471	0	0	0	0	0	1303	1148	9100	2439	34411
DESP_HUMAN	Desmoplakin (DP) (250/210 kDa paraneoplastic pemphigus antigen)	3215	2593	1997	1922	1930	1607	1473	1649	1673	1708	4091	4360	2299	3738	11118	0	0	0	0	0
PGM2_HUMAN	Phosphopentomutase (EC 5.4.2.7) (Glucose phosphomutase 2) (Phosphodeoxyribomutase) (Phosphoglucomutase-2) (EC 5.4.2.2)	3195	3306	4824	4022	3182	7240	7223	8763	9572	7664	963	788	1204	467	563	0	0	0	0	0
FLOT1_HUMAN	Flotillin-1	3187	1056	2129	2137	2354	2938	947	701	869	948	6112	7495	6550	7619	4308	0	0	0	0	0
IGLC7_HUMAN	Immunoglobulin lambda constant 7 (Ig lambda-7 chain C region)	3179	1529	783	2215	1460	472	437	1257	728	812	2544	8725	2303	1367	5039	0	0	0	0	0
BPT2_BOVIN	Spleen trypsin inhibitor I (SI-I) [Cleaved into: Spleen trypsin inhibitor II (SI-II); Spleen trypsin inhibitor III (SI-III)]	3156	4746	3559	3784	3212	3054	3194	2478	2055	3170	0	0	0	0	0	909	3026	31755	30483	96943
COR1A_BOVIN	Coronin-1A (Coronin-like protein A) (Clipin-A) (Coronin-like protein p57) (Tryptophan aspartate-containing coat protein) (TACO)	3149	2766	2166	3054	2791	4613	5927	4693	4977	6843	0	0	0	0	0	2365	39371	106892	94957	91002
HEBP1_BOVIN	Heme-binding protein 1	3108	3555	1299	3559	4059	3682	4316	4087	5627	6831	0	0	0	0	0	781	22376	71688	99402	82026
FABP5_HUMAN	Fatty acid-binding protein 5 (Epidermal-type fatty acid-binding protein) (E-FABP) (Fatty acid-binding protein, epidermal) (Psoriasis-associated fatty acid-binding protein homolog) (PA-FABP)	3106	2050	4955	2685	3598	3317	2028	1807	1972	1608	3336	4193	4927	3777	6932	0	0	0	0	0
CYTC_HUMAN	Suprabasin	3103	1552	1974	2219	888	543	988	1456	959	1696	14575	11050	16516	13336	12367	0	0	0	0	0
GP1BA_HUMAN	Platelet glycoprotein Ib alpha chain (GP-Ib alpha) (GPIb-alpha) (GPIbA) (Glycoprotein Ibalpha) (Antigen CD42b-alpha) (CD antigen CD42b) [Cleaved into: Glycocalicin]	3094	2664	2099	4859	3644	3287	1889	3544	2158	3603	15659	19064	15404	23535	12412	0	0	0	0	0
CBPN_HUMAN	Carboxypeptidase N catalytic chain (CPN) (EC 3.4.17.3) (Anaphylatoxin inactivator) (Arginine carboxypeptidase) (Carboxypeptidase N polypeptide 1) (Carboxypeptidase N small subunit) (Kininase-1) (Lysine carboxypeptidase) (Plasma carboxypeptidase B) (Serum carboxypeptidase N) (SCPN)	3072	1987	1289	2192	2674	1633	1404	1378	1975	1250	28166	31608	31258	29062	22780	0	0	0	0	0
APMAP_BOVIN	Adipocyte plasma membrane-associated protein	3019	2802	1771	3476	2212	2979	3733	4951	4407	6137	0	0	0	0	0	1047	920	988	872	952
NUCL_HUMAN	Nucleolin (Protein C23)	3002	3235	2310	4008	4822	3776	3912	3526	3025	4497	8777	12164	8635	8215	4214	0	0	0	0	0
MIS_BOVIN	Muellerian-inhibiting factor (Anti-Muellerian hormone) (AMH) (Muellerian-inhibiting substance) (MIS)	2985	3885	2904	2006	1217	2353	2089	2620	2842	3645	0	0	0	0	0	1083	1342	1277	1126	998
TPMT_BOVIN	Thiopurine S-methyltransferase (EC 2.1.1.67) (Thiopurine methyltransferase)	2968	1994	1292	1710	1786	2628	4443	2575	2845	6062	0	0	0	0	0	1342	1954	83970	63664	76627
AOC3_BOVIN	Membrane primary amine oxidase (EC 1.4.3.21) (Copper amine oxidase) (Semicarbazide-sensitive amine oxidase) (SSAO) (Vascular adhesion protein 1) (VAP-1)	2926	4235	3602	4108	3593	4140	3126	4495	5650	1575	0	0	0	0	0	1243	1105	1043	1247	1761
COMP_HUMAN	Cartilage oligomeric matrix protein (COMP) (Thrombospondin-5) (TSP5)	2905	3977	4063	2589	1697	2010	5723	1327	1805	2297	1065	988	1156	659	419	0	0	0	0	0
PGRP1_HUMAN	Peptidoglycan recognition protein 1 (Peptidoglycan recognition protein short) (PGRP-S)	2896	2313	2220	2153	2245	1930	2491	1920	2398	1842	5280	10562	4674	8261	14303	0	0	0	0	0
NHRF1_BOVIN	Na(+)/H(+) exchange regulatory cofactor NHE-RF1 (NHERF-1) (Ezrin-radixin-moesin-binding phosphoprotein 50) (EBP50) (Regulatory cofactor of Na(+)/H(+) exchanger) (Sodium-hydrogen exchanger regulatory factor 1) (Solute carrier family 9 isoform A3 regulatory factor 1)	2893	3042	2928	3297	1063	3227	2061	1992	2252	4199	0	0	0	0	0	1033	3006	123040	119207	104024
BHMT1_BOVIN	Betaine--homocysteine S-methyltransferase 1 (EC 2.1.1.5)	2874	4736	4570	4291	2900	4814	5107	5106	6909	6478	0	0	0	0	0	1526	1404	1530	1012	1122
LMNA_HUMAN	Prelamin-A/C [Cleaved into: Lamin-A/C (70 kDa lamin) (Renal carcinoma antigen NY-REN-32)]	2859	2341	1975	3005	5072	2183	2094	2093	1493	2727	10534	13213	9015	13781	4860	0	0	0	0	0
TENX_HUMAN	Tenascin-X (TN-X) (Hexabrachion-like protein)	2850	2418	2126	3751	4240	1335	1630	2004	1972	1633	697	451	555	589	524	0	0	0	0	0
IBP2_HUMAN	Insulin-like growth factor-binding protein 2 (IBP-2) (IGF-binding protein 2) (IGFBP-2)	2835	3010	2724	2914	2318	1505	1616	1406	1482	1024	92223	56381	63959	54737	98115	0	0	0	0	0
RETN_HUMAN	Resistin (Adipose tissue-specific secretory factor) (ADSF) (C/EBP-epsilon-regulated myeloid-specific secreted cysteine-rich protein) (Cysteine-rich secreted protein A12-alpha-like 2) (Cysteine-rich secreted protein FIZZ3)	2797	2714	1578	3238	1714	1746	2225	1160	1947	1853	13494	10735	11007	4436	15324	0	0	0	0	0
CALD1_HUMAN	Caldesmon (CDM)	2733	3147	2628	3298	2928	2498	2047	2439	3601	2979	1731	1579	1611	1351	1856	0	0	0	0	0
SEPR_BOVIN	Prolyl endopeptidase FAP (EC 3.4.21.26) (Dipeptidyl peptidase FAP) (EC 3.4.14.5) (Fibroblast activation protein alpha) (FAPalpha) (Gelatine degradation protease FAP) (EC 3.4.21.-) (Integral membrane serine protease) (Post-proline cleaving enzyme) (Serine integral membrane protease) (SIMP) (Surface-expressed protease) (Seprase) (Z-Pro-prolinal insensitive peptidase) (ZIP) [Cleaved into: Antiplasmi…	2724	3153	2992	2634	1794	3151	2639	3643	3558	2404	0	0	0	0	0	1462	1960	925	1068	1095
TGM1_HUMAN	Protein-glutamine gamma-glutamyltransferase K (EC 2.3.2.13) (Epidermal TGase) (Transglutaminase K) (TG(K)) (TGK) (TGase K) (Transglutaminase-1) (TGase-1)	2708	2116	2302	1630	7652	956	1606	11919	1335	745	670	686	687	553	2528	0	0	0	0	0
DCXR_BOVIN	L-xylulose reductase (XR) (EC 1.1.1.10) (Dicarbonyl/L-xylulose reductase)	2694	3682	2196	2433	1933	5791	10998	9823	8390	15502	0	0	0	0	0	1082	1157	1278	1011	1019
SGTA_BOVIN	Small glutamine-rich tetratricopeptide repeat-containing protein alpha (Alpha-SGT)	2684	1379	1220	2060	1360	1198	1835	1554	1596	1994	0	0	0	0	0	1308	1338	27894	27868	56640
S29A1_HUMAN	Equilibrative nucleoside transporter 1 (hENT1) (Equilibrative nitrobenzylmercaptopurine riboside-sensitive nucleoside transporter) (Equilibrative NBMPR-sensitive nucleoside transporter) (es nucleoside transporter) (Nucleoside transporter, es-type) (Solute carrier family 29 member 1)	2681	1509	1648	2050	2793	1672	1340	1536	1069	906	2168	1568	1939	2351	3874	0	0	0	0	0
UBA1_BOVIN	Ubiquitin-like modifier-activating enzyme 1 (EC 6.2.1.45) (Ubiquitin-activating enzyme E1)	2680	1868	1356	2042	1201	4103	4963	5660	6475	7726	0	0	0	0	0	967	1002	21830	30688	22815
S10A4_HUMAN	Protein S100-A4 (Calvasculin) (Metastasin) (Placental calcium-binding protein) (Protein Mts1) (S100 calcium-binding protein A4)	2646	1880	1256	3804	2825	2928	2332	1363	1232	1970	12974	8222	10380	7907	4548	0	0	0	0	0
PECA1_HUMAN	Platelet endothelial cell adhesion molecule (PECAM-1) (EndoCAM) (GPIIA') (PECA1) (CD antigen CD31)	2643	2072	1343	3799	1993	1323	1914	1583	2034	2523	13582	12092	14859	16169	11683	0	0	0	0	0
CONG_BOVIN	Conglutinin	2611	2390	1928	1956	1876	3339	2781	1605	1698	2463	0	0	0	0	0	499	462	934	1272	4783
GDIR2_HUMAN	Rho GDP-dissociation inhibitor 2 (Rho GDI 2) (Ly-GDI) (Rho-GDI beta)	2576	2459	1232	2358	3053	1571	2045	2105	1477	2650	9332	3030	9973	10803	5871	0	0	0	0	0
CATA_HUMAN	Catalase (EC 1.11.1.6)	2530	2941	3151	3653	3734	2386	2094	2673	1785	3515	9746	10911	9923	11233	9599	0	0	0	0	0
VAT1_HUMAN	Synaptic vesicle membrane protein VAT-1 homolog (EC 1.-.-.-)	2513	4003	3153	3761	2770	3157	3151	2951	1702	2857	3389	3278	2150	5599	2777	0	0	0	0	0
BPIA1_HUMAN	BPI fold-containing family A member 1 (Lung-specific protein X) (Nasopharyngeal carcinoma-related protein) (Palate lung and nasal epithelium clone protein) (Secretory protein in upper respiratory tracts) (Short PLUNC1) (SPLUNC1) (Tracheal epithelium-enriched protein) (Von Ebner protein Hl)	2500	2533	2144	3077	2899	1269	3295	2781	3740	2867	9417	12102	7915	10074	7450	0	0	0	0	0
GSTO1_HUMAN	Glutathione S-transferase omega-1 (GSTO-1) (EC 2.5.1.18) (Glutathione S-transferase omega 1-1) (GSTO 1-1) (Glutathione-dependent dehydroascorbate reductase) (EC 1.8.5.1) (Monomethylarsonic acid reductase) (MMA(V) reductase) (EC 1.20.4.2) (S-(Phenacyl)glutathione reductase) (SPG-R)	2499	2507	2012	3217	2621	2511	3229	3005	2364	3917	1972	2597	3425	4636	3638	0	0	0	0	0
SRC_HUMAN	Proto-oncogene tyrosine-protein kinase Src (EC 2.7.10.2) (Proto-oncogene c-Src) (pp60c-src) (p60-Src)	2474	1954	1077	2739	3004	1518	1008	936	1609	1475	5271	6983	5612	6931	2835	0	0	0	0	0
STEA3_HUMAN	Metalloreductase STEAP3 (EC 1.16.1.-) (Dudulin-2) (Six-transmembrane epithelial antigen of prostate 3) (Tumor suppressor-activated pathway protein 6) (hTSAP6) (pHyde) (hpHyde)	2393	1557	2127	3362	2758	2506	781	1959	1528	1703	2611	4372	5500	6237	4804	0	0	0	0	0
NRP1_HUMAN	Neuropilin-1 (Vascular endothelial cell growth factor 165 receptor) (CD antigen CD304)	2384	2173	1951	2014	1633	1879	1668	3500	2664	1568	670	581	1119	935	1021	0	0	0	0	0
PHP14_BOVIN	14 kDa phosphohistidine phosphatase (EC 3.9.1.3) (Phosphohistidine phosphatase 1) (PHPT1) (Protein histidine phosphatase) (PHP)	2381	2308	2363	2521	1535	2939	802	3147	2397	3420	0	0	0	0	0	2009	2227	20813	12352	14216
C4BPB_HUMAN	C4b-binding protein beta chain	2375	1410	1611	2112	2085	1661	1817	2566	1748	1887	16636	12452	12587	10980	26266	0	0	0	0	0
RAP2B_HUMAN	Ras-related protein Rap-2b (EC 3.6.5.2)	2372	2336	1480	2502	2325	1464	2117	1559	1682	2415	9456	8614	10481	10476	7347	0	0	0	0	0
CAVN2_HUMAN	Caveolae-associated protein 2 (Cavin-2) (PS-p68) (Phosphatidylserine-binding protein) (Serum deprivation-response protein)	2346	1704	1756	2242	2897	2498	1663	1794	1587	1968	1367	6036	6570	3966	4268	0	0	0	0	0
ARLY_BOVIN	Argininosuccinate lyase (ASAL) (EC 4.3.2.1) (Arginosuccinase)	2342	2249	1914	3028	2058	3128	4585	3422	3819	5968	0	0	0	0	0	1343	1382	33445	28356	32262
K1C19_HUMAN	Keratin, type I cytoskeletal 19 (Cytokeratin-19) (CK-19) (Keratin-19) (K19)	2328	1469	1378	2124	2580	1725	2180	1769	1583	1865	6458	9422	8641	12297	5807	0	0	0	0	0
PNPH_BOVIN	Purine nucleoside phosphorylase (PNP) (EC 2.4.2.1) (Inosine phosphorylase) (Inosine-guanosine phosphorylase)	2312	2548	1818	2807	1281	4591	8463	5390	5682	7471	0	0	0	0	0	1133	1098	960	1340	1645
DSG1_HUMAN	Desmoglein-1 (Cadherin family member 4) (Desmosomal glycoprotein 1) (DG1) (DGI) (Pemphigus foliaceus antigen)	2283	1784	2347	2075	2094	2042	1819	1614	1716	1417	3597	1900	1774	5569	15559	0	0	0	0	0
MMRN1_HUMAN	Multimerin-1 (EMILIN-4) (Elastin microfibril interface located protein 4) (Elastin microfibril interfacer 4) (Endothelial cell multimerin) [Cleaved into: Platelet glycoprotein Ia*; 155 kDa platelet multimerin (p-155) (p155)]	2274	1420	1321	2830	1998	1621	1198	1700	1333	1715	7015	7708	7044	9048	4705	0	0	0	0	0
HABP2_HUMAN	Hyaluronan-binding protein 2 (EC 3.4.21.-) (Factor VII-activating protease) (Factor seven-activating protease) (FSAP) (Hepatocyte growth factor activator-like protein) (Plasma hyaluronan-binding protein) [Cleaved into: Hyaluronan-binding protein 2 50 kDa heavy chain; Hyaluronan-binding protein 2 50 kDa heavy chain alternate form; Hyaluronan-binding protein 2 27 kDa light chain; Hyaluronan-binding…	2250	1521	1560	1180	1645	875	615	1273	682	1297	5363	2686	6854	4941	5757	0	0	0	0	0
PRDX5_BOVIN	Peroxiredoxin-5, mitochondrial (EC 1.11.1.24) (Peroxiredoxin V) (Prx-V) (Thioredoxin peroxidase) (Thioredoxin-dependent peroxiredoxin 5)	2241	5101	11809	3680	2566	4301	4658	1755	6701	10691	0	0	0	0	0	783	2050	1904	2078	1497
PCDGK_HUMAN	Protocadherin gamma-C3 (PCDH-gamma-C3) (Protocadherin-2) (Protocadherin-43) (PC-43)	2238	2601	2890	3311	2413	2604	3385	2723	2829	2966	1088	921	1000	1148	1253	0	0	0	0	0
CATS_BOVIN	Cathepsin S (EC 3.4.22.27)	2232	2245	1755	2048	1888	2248	2205	2153	2723	1302	0	0	0	0	0	519	622	595	597	489
CNDP1_HUMAN	Coagulation factor IX (EC 3.4.21.22) (Christmas factor) (Plasma thromboplastin component) (PTC) [Cleaved into: Coagulation factor IXa light chain; Coagulation factor IXa heavy chain]	2230	1409	935	1391	1156	814	714	1481	810	1316	3360	4185	5742	2894	4544	0	0	0	0	0
CNDP2_BOVIN	Cytosolic non-specific dipeptidase (EC 3.4.13.18) (CNDP dipeptidase 2) (Threonyl dipeptidase)	2227	1584	1955	2088	1139	2951	4594	4046	4025	4177	0	0	0	0	0	4393	3196	44759	57547	54465
WDR1_BOVIN	WD repeat-containing protein 1	2212	1510	2669	2481	685	4546	3324	4958	3336	4207	0	0	0	0	0	537	512	10048	361	4489
SYNC_BOVIN	Asparagine--tRNA ligase, cytoplasmic (EC 6.1.1.22) (Asparaginyl-tRNA synthetase) (AsnRS)	2188	1453	1523	2467	1378	2609	2530	2667	1954	3014	0	0	0	0	0	548	607	1449	22054	792
IDHC_BOVIN	Isocitrate dehydrogenase [NADP] cytoplasmic (IDH) (IDH1) (EC 1.1.1.42) (Cytosolic NADP-isocitrate dehydrogenase) (IDPc) (NADP(+)-specific ICDH) (Oxalosuccinate decarboxylase)	2181	1105	2574	1059	1031	4930	5755	6772	6589	6512	0	0	0	0	0	632	661	697	865	1348
K2C8_HUMAN	Keratin, type II cytoskeletal 8 (Cytokeratin-8) (CK-8) (Keratin-8) (K8) (Type-II keratin Kb8)	2180	2818	2017	1959	2383	1621	2119	1643	3088	2046	2935	3690	3726	4535	2069	0	0	0	0	0
FETUB_HUMAN	Malate dehydrogenase, cytoplasmic (EC 1.1.1.37) (Aromatic alpha-keto acid reductase) (KAR) (EC 1.1.1.96) (Cytosolic malate dehydrogenase)	2162	854	999	1481	1117	898	1560	1233	1177	952	8660	8959	11139	6016	9310	0	0	0	0	0
IBP3_HUMAN	Insulin-like growth factor-binding protein 3 (IBP-3) (IGF-binding protein 3) (IGFBP-3)	2142	2376	1783	1602	2345	1613	1669	1603	1337	1332	29453	18625	22658	21381	25919	0	0	0	0	0
ENPL_BOVIN	Endoplasmin (94 kDa glucose-regulated protein) (GRP-94) (Heat shock protein 90 kDa beta member 1)	2131	1702	1769	1505	1023	1971	3560	2405	1214	3012	0	0	0	0	0	1194	865	566	629	524
PDIA1_HUMAN	Protein disulfide-isomerase (PDI) (EC 5.3.4.1) (Cellular thyroid hormone-binding protein) (Prolyl 4-hydroxylase subunit beta) (p55)	2126	923	809	2026	2345	874	1913	1489	753	1763	5439	6589	4975	6163	3535	0	0	0	0	0
DAG1_BOVIN	Dystroglycan 1 (Dystroglycan) (Dystrophin-associated glycoprotein 1) [Cleaved into: Alpha-dystroglycan (Alpha-DG); Beta-dystroglycan (Beta-DG)]	2104	3654	3600	2996	3199	2971	2034	2898	4308	4029	0	0	0	0	0	1276	891	1001	1146	1220
GSTT1_BOVIN	Glutathione S-transferase theta-1 (EC 2.5.1.18) (GST class-theta-1)	2100	2498	2454	1995	1472	2925	3325	3219	3316	4820	0	0	0	0	0	720	557	697	906	741
PGK1_HUMAN	Phosphoglycerate kinase 1 (EC 2.7.2.3) (Cell migration-inducing gene 10 protein) (Primer recognition protein 2) (PRP 2)	2096	1936	1768	2167	1571	1387	1382	2065	1539	2327	10436	10842	9530	10213	3947	0	0	0	0	0
LEG3_HUMAN	Galectin-3 (Gal-3) (35 kDa lectin) (Carbohydrate-binding protein 35) (CBP 35) (Galactose-specific lectin 3) (Galactoside-binding protein) (GALBP) (IgE-binding protein) (L-31) (Laminin-binding protein) (Lectin L-29) (Mac-2 antigen)	2095	1753	1803	2286	2773	1502	1177	855	1644	1263	4042	3912	3367	2241	1011	0	0	0	0	0
CAP1_HUMAN	Adenylyl cyclase-associated protein 1 (CAP 1)	2051	2048	2271	2809	1675	1967	1645	2316	2564	3543	13695	15707	17690	18157	12290	0	0	0	0	0
ANTR1_HUMAN	Serum amyloid A-2 protein (SAA2) [Cleaved into: Amyloid A2 protein (AA2)]	2045	1086	1490	1881	949	1260	1205	1224	956	1250	1054	1201	1146	1486	1617	0	0	0	0	0
PCSK9_HUMAN	Ribonucleoside-diphosphate reductase large subunit (EC 1.17.4.1) (Ribonucleoside-diphosphate reductase subunit M1) (Ribonucleotide reductase large subunit)	2036	1967	1601	1765	845	723	1009	2448	1444	802	6087	4283	6056	3093	4513	0	0	0	0	0
PRVA_BOVIN	Parvalbumin alpha	2024	696	1017	1746	3642	1461	1923	1214	595	1494	0	0	0	0	0	499	627	530	661	641
PDC6I_HUMAN	Programmed cell death 6-interacting protein (PDCD6-interacting protein) (ALG-2-interacting protein 1) (ALG-2-interacting protein X) (Hp95)	2023	1453	1751	2668	2618	1478	2758	2840	2171	2969	3108	2409	5478	4187	2976	0	0	0	0	0
PSMD5_BOVIN	26S proteasome non-ATPase regulatory subunit 5	1979	1705	1733	2187	2216	4639	5201	6119	3993	7453	0	0	0	0	0	1483	2404	32157	51354	21137
PNPH_HUMAN	Purine nucleoside phosphorylase (PNP) (EC 2.4.2.1) (Inosine phosphorylase) (Inosine-guanosine phosphorylase)	1973	1532	1652	2211	1393	1036	960	1457	1403	2141	6240	9647	10068	8498	6342	0	0	0	0	0
RAB14_HUMAN	Ras-related protein Rab-14	1966	1610	1297	2273	1697	2196	3047	2861	1903	3440	2997	2232	2508	1624	1752	0	0	0	0	0
KRT85_HUMAN	Sec1 family domain-containing protein 1 (SLY1 homolog) (Sly1p) (Syntaxin-binding protein 1-like 2)	1922	867	1276	1053	699	717	1272	697	1218	677	1196	1406	962	1040	472406	0	0	0	0	0
K1C18_HUMAN	Keratin, type I cytoskeletal 18 (Cell proliferation-inducing gene 46 protein) (Cytokeratin-18) (CK-18) (Keratin-18) (K18)	1911	1372	1804	2599	4355	1742	2995	2466	1477	2547	5160	11369	10197	11829	5154	0	0	0	0	0
CASPE_HUMAN	Keratin, type I cuticular Ha3-II (Hair keratin, type I Ha3-II) (Keratin-33B) (K33B)	1908	1467	1757	1556	1335	1335	1979	1389	1938	1834	1938	3861	1504	1686	8756	0	0	0	0	0
DSC1_HUMAN	Importin-7 (Imp7) (Ran-binding protein 7) (RanBP7)	1898	2232	3655	1525	1235	1252	1950	1328	1467	1351	3372	3827	3409	7132	15077	0	0	0	0	0
ANXA7_HUMAN	Annexin A7 (Annexin VII) (Annexin-7) (Synexin)	1875	1768	1338	2502	2171	1276	1280	1152	1039	2269	8364	8991	7597	8672	4487	0	0	0	0	0
HLAC_HUMAN	Keratin, type I cuticular Ha6 (Hair keratin, type I Ha6) (Keratin-36) (K36)	1860	1811	1305	1434	1047	1814	1588	1630	1533	1215	5160	1567	2529	1438	5133	0	0	0	0	0
PA2G4_HUMAN	Proliferation-associated protein 2G4 (Cell cycle protein p38-2G4 homolog) (hG4-1) (ErbB3-binding protein 1)	1828	2025	2053	2023	3461	2218	2066	2673	2355	3451	3633	3782	3183	2702	1822	0	0	0	0	0
P4HA1_BOVIN	Prolyl 4-hydroxylase subunit alpha-1 (4-PH alpha-1) (EC 1.14.11.2) (Procollagen-proline,2-oxoglutarate-4-dioxygenase subunit alpha-1)	1803	1154	1111	1382	1424	4317	4083	3545	3763	4598	0	0	0	0	0	645	519	577	712	675
PLXB2_HUMAN	Plexin-B2 (MM1)	1800	2241	2118	2451	1608	1867	2107	2225	2673	1752	548	701	751	719	988	0	0	0	0	0
CD59_HUMAN	Inter-alpha-trypsin inhibitor heavy chain H3 (ITI heavy chain H3) (ITI-HC3) (Inter-alpha-inhibitor heavy chain 3) (Serum-derived hyaluronan-associated protein) (SHAP)	1792	1570	904	2060	1284	1028	1659	691	1266	2356	10341	8175	7979	10227	11905	0	0	0	0	0
AHNK_HUMAN	Neuroblast differentiation-associated protein AHNAK (Desmoyokin)	1779	1543	1410	1862	1938	1428	1152	1247	1266	1374	3216	3514	2101	3349	3079	0	0	0	0	0
C1TC_HUMAN	Ankyrin-1 (ANK-1) (Ankyrin-R) (Erythrocyte ankyrin)	1745	1088	1068	1277	1077	1186	5405	1331	1418	5038	756	901	804	995	796	0	0	0	0	0
ATRN_HUMAN	Exportin-1 (Exp1) (Chromosome region maintenance 1 protein homolog)	1740	1180	1201	928	1148	1373	837	2346	1246	935	973	730	870	801	4790	0	0	0	0	0
HNRPU_HUMAN	Heterogeneous nuclear ribonucleoprotein U (hnRNP U) (GRIP120) (Nuclear p120 ribonucleoprotein) (Scaffold-attachment factor A) (SAF-A) (p120) (pp120)	1738	1460	1289	2092	3002	1879	2634	1170	1588	2422	6952	5092	5573	7249	2656	0	0	0	0	0
ANGL6_HUMAN	Angiopoietin-related protein 6 (Angiopoietin-like protein 6) (Angiopoietin-related growth factor) (Angiopoietin-related protein 5)	1728	1236	1061	1687	1680	835	932	1330	689	850	2187	1031	2574	2089	763	0	0	0	0	0
FHR2_HUMAN	Complement factor H-related protein 2 (FHR-2) (DDESK59) (H factor-like 3) (H factor-like protein 2)	1727	1688	1009	820	1466	892	1624	939	1709	989	5274	2041	4460	942	6228	0	0	0	0	0
JAM1_HUMAN	Integrin alpha-M (CD11 antigen-like family member B) (CR-3 alpha chain) (Cell surface glycoprotein MAC-1 subunit alpha) (Leukocyte adhesion receptor MO1) (Neutrophil adherence receptor) (CD antigen CD11b)	1723	1137	1441	2364	1343	1694	1407	1433	915	1477	7469	11364	10464	9341	5633	0	0	0	0	0
FHR4_HUMAN	Transforming growth factor-beta-induced protein ig-h3 (Beta ig-h3) (Kerato-epithelin) (RGD-containing collagen-associated protein) (RGD-CAP)	1707	701	689	871	872	859	824	936	1265	909	13116	6928	8609	6001	12540	0	0	0	0	0
OIT3_BOVIN	Oncoprotein-induced transcript 3 protein	1701	1461	1047	1299	1743	1189	1946	1678	1696	1829	0	0	0	0	0	1176	1074	1712	1218	13903
PDE3A_HUMAN	Pigment epithelium-derived factor (PEDF) (Cell proliferation-inducing gene 35 protein) (EPC-1) (Serpin F1)	1682	1025	813	757	1065	1801	2380	1427	1918	2806	1249	984	700	882	864	0	0	0	0	0
A16A1_BOVIN	Aldehyde dehydrogenase family 16 member A1	1681	1851	1582	1945	1407	3309	3407	3742	3676	5279	0	0	0	0	0	1284	1197	1776	1817	1585
SPB5_HUMAN	Serpin B5 (Maspin) (Peptidase inhibitor 5) (PI-5)	1675	902	752	1048	3428	1023	1517	1425	1039	1156	5223	5928	4398	6950	4229	0	0	0	0	0
CBPB2_HUMAN	Fetuin-B (16G2) (Fetuin-like protein IRL685) (Gugu)	1663	966	994	1174	1126	1084	880	1446	1072	1218	4281	3514	4829	3670	4797	0	0	0	0	0
SNED1_HUMAN	Sushi, nidogen and EGF-like domain-containing protein 1 (Insulin-responsive sequence DNA-binding protein 1) (IRE-BP1)	1657	1681	1395	1510	1626	1386	1206	1475	1236	1567	9766	10855	13059	11346	5253	0	0	0	0	0
ANTR2_HUMAN	Protein-glutamine gamma-glutamyltransferase E (EC 2.3.2.13) (Transglutaminase E) (TG(E)) (TGE) (TGase E) (Transglutaminase-3) (TGase-3) [Cleaved into: Protein-glutamine gamma-glutamyltransferase E 50 kDa catalytic chain; Protein-glutamine gamma-glutamyltransferase E 27 kDa non-catalytic chain]	1642	1802	778	844	1188	792	694	760	657	727	7571	6584	8009	8236	5715	0	0	0	0	0
MRC2_HUMAN	Gasdermin-A (Gasdermin-1) [Cleaved into: Gasdermin-A, N-terminal (GSDMA-NT); Gasdermin-A, C-terminal (GSDMA-CT)]	1642	1492	1656	1142	1057	1453	1123	1542	2042	1367	992	1319	1240	1211	808	0	0	0	0	0
SPL2A_BOVIN	Short palate, lung and nasal epithelium carcinoma-associated protein 2A (BSP30a) (Common salivary protein form a)	1641	1620	2456	2678	2611	4501	8220	5249	3264	5109	0	0	0	0	0	2751	1883	22202	11573	2489
PACN2_HUMAN	Glutamine--fructose-6-phosphate aminotransferase [isomerizing] 1 (EC 2.6.1.16) (D-fructose-6-phosphate amidotransferase 1) (Glutamine:fructose-6-phosphate amidotransferase 1) (GFAT 1) (GFAT1) (Hexosephosphate aminotransferase 1)	1634	1125	1512	1884	1223	2060	2349	2453	1986	3133	630	760	877	931	1282	0	0	0	0	0
CAH2_HUMAN	Carbonic anhydrase 2 (EC 4.2.1.1) (Carbonate dehydratase II) (Carbonic anhydrase C) (CAC) (Carbonic anhydrase II) (CA-II) (Cyanamide hydratase CA2) (EC 4.2.1.69)	1631	1426	1051	1734	1787	1294	1181	1275	869	847	1711	3710	3767	650	3404	0	0	0	0	0
PTCA_HUMAN	Protein tyrosine phosphatase receptor type C-associated protein (PTPRC-associated protein) (CD45-associated protein) (CD45-AP) (Lymphocyte phosphatase-associated phosphoprotein)	1624	1633	1179	2478	1553	1065	1410	1159	1063	2005	7848	6212	7018	3004	4038	0	0	0	0	0
AT1B1_HUMAN	Sodium/potassium-transporting ATPase subunit beta-1 (Sodium/potassium-dependent ATPase subunit beta-1)	1614	1335	1649	2031	2480	1034	1512	640	939	651	1122	744	541	590	535	0	0	0	0	0
KRT83_BOVIN	Keratin, type II cuticular Hb3 (Keratin-83) (K83) (Type II hair keratin Hb3) (Type-II keratin Kb23)	1611	1467	1451	1448	1929	1500	1880	1595	1962	1635	0	0	0	0	0	1502	1380	1458	2067	1582
SL7A1_HUMAN	Junctional adhesion molecule A (JAM-A) (Junctional adhesion molecule 1) (JAM-1) (Platelet F11 receptor) (Platelet adhesion molecule 1) (PAM-1) (CD antigen CD321)	1600	2716	840	2385	1377	1105	965	970	868	697	9699	8694	8074	8231	6746	0	0	0	0	0
KT33B_HUMAN	Biotinidase (Biotinase) (EC 3.5.1.12)	1599	976	1150	1368	1315	1326	1003	1114	703	1064	643	954	1061	1418	6374	0	0	0	0	0
EGFR_HUMAN	Epidermal growth factor receptor (EC 2.7.10.1) (Proto-oncogene c-ErbB-1) (Receptor tyrosine-protein kinase erbB-1)	1570	2547	4024	2632	2648	4424	3135	3725	4497	1856	968	762	1019	629	623	0	0	0	0	0
LACRT_HUMAN	Extracellular glycoprotein lacritin	1557	1276	1338	1247	1407	1319	1525	1099	770	1419	1025	950	1045	997	1036	0	0	0	0	0
MARCS_BOVIN	Myristoylated alanine-rich C-kinase substrate (MARCKS) (ACAMP-81)	1544	995	1047	1179	995	1693	1378	1672	1828	1898	0	0	0	0	0	643	1709	5795	4666	9216
BLMH_HUMAN	Anthrax toxin receptor 1 (Tumor endothelial marker 8)	1536	1793	2576	1562	958	941	1480	756	1814	979	1731	2265	794	3044	7549	0	0	0	0	0
COIA1_HUMAN	Collagen alpha-1(XVIII) chain [Cleaved into: Endostatin; Non-collagenous domain 1 (NC1)]	1526	2241	2071	2983	2070	2342	1602	2280	1697	1927	8711	10958	8459	11236	5635	0	0	0	0	0
TCPE_HUMAN	T-complex protein 1 subunit epsilon (TCP-1-epsilon) (CCT-epsilon)	1525	1127	1459	1332	1606	1777	2549	1861	2043	3108	774	853	1025	1001	1128	0	0	0	0	0
ITAM_HUMAN	Caspase-14 (CASP-14) (EC 3.4.22.-) [Cleaved into: Caspase-14 subunit p17, mature form; Caspase-14 subunit p10, mature form; Caspase-14 subunit p20, intermediate form; Caspase-14 subunit p8, intermediate form]	1495	1376	1296	1489	1342	1222	1116	1631	1038	1542	5006	3889	6225	7174	3381	0	0	0	0	0
F13B_HUMAN	Coagulation factor XIII B chain (Fibrin-stabilizing factor B subunit) (Protein-glutamine gamma-glutamyltransferase B chain) (Transglutaminase B chain)	1487	1050	1587	2021	2215	2188	1282	2112	1244	2264	2015	1640	3672	2495	5195	0	0	0	0	0
ANX11_BOVIN	Annexin A11 (Annexin XI) (Annexin-11) (Calcyclin-associated annexin-50) (CAP-50)	1457	2060	1583	3351	3438	1722	6069	4466	1379	1675	0	0	0	0	0	1300	1332	74783	43519	48332
GFPT1_HUMAN	Glycogen debranching enzyme (Glycogen debrancher) [Includes: 4-alpha-glucanotransferase (EC 2.4.1.25) (Oligo-1,4-1,4-glucantransferase); Amylo-alpha-1,6-glucosidase (Amylo-1,6-glucosidase) (EC 3.2.1.33) (Dextrin 6-alpha-D-glucosidase)]	1457	1336	1048	1155	1220	3145	934	3662	3454	2991	980	784	946	957	889	0	0	0	0	0
BASP1_BOVIN	Brain acid soluble protein 1 (22 kDa neuronal tissue-enriched acidic protein) (Neuronal axonal membrane protein NAP-22)	1455	824	626	646	929	1286	1272	1023	1363	2232	0	0	0	0	0	588	623	576	794	963
MYO1G_HUMAN	Unconventional myosin-Ig [Cleaved into: Minor histocompatibility antigen HA-2 (mHag HA-2)]	1451	1993	1134	2437	1438	1287	1429	1206	1263	1290	1582	2542	1937	1781	2317	0	0	0	0	0
SPTB1_HUMAN	Mammaglobin-B (Lacryglobin) (Lipophilin-C) (Mammaglobin-2) (Secretoglobin family 2A member 1)	1439	1169	1621	1929	859	806	1614	976	1272	1175	5811	5696	5900	5479	1098	0	0	0	0	0
IPO5_HUMAN	Desmocollin-1 (Cadherin family member 1) (Desmosomal glycoprotein 2/3) (DG2/DG3)	1423	1269	915	1156	1252	3840	4351	4026	3578	5152	1018	1192	837	981	973	0	0	0	0	0
PPCE_BOVIN	Prolyl endopeptidase (PE) (EC 3.4.21.26) (Post-proline cleaving enzyme)	1412	1718	1851	1157	1552	2290	4109	2472	1857	2969	0	0	0	0	0	584	615	522	795	703
PRAP1_HUMAN	cGMP-inhibited 3',5'-cyclic phosphodiesterase 3A (EC 3.1.4.17) (Cyclic GMP-inhibited phosphodiesterase A) (CGI-PDE A) (cGMP-inhibited cAMP phosphodiesterase) (cGI-PDE)	1409	1141	1106	864	1069	1366	772	733	917	668	9938	9590	11147	1431	5672	0	0	0	0	0
EZRI_HUMAN	Ezrin (Cytovillin) (Villin-2) (p81)	1390	1324	1217	3244	1385	994	1633	1054	1349	1835	9607	10167	8370	10343	6569	0	0	0	0	0
GSDMA_HUMAN	HLA class I histocompatibility antigen, C alpha chain (HLA-C) (HLA-Cw) (Human leukocyte antigen C)	1384	1001	990	933	1054	946	763	917	1108	882	1079	1084	633	2440	7797	0	0	0	0	0
MUC5B_HUMAN	Protein disulfide-isomerase A3 (EC 5.3.4.1) (58 kDa glucose-regulated protein) (58 kDa microsomal protein) (p58) (Disulfide isomerase ER-60) (Endoplasmic reticulum resident protein 57) (ER protein 57) (ERp57) (Endoplasmic reticulum resident protein 60) (ER protein 60) (ERp60)	1367	1419	931	636	822	744	1354	783	863	779	4727	673	5960	1546	2732	0	0	0	0	0
BLVRB_HUMAN	Flavin reductase (NADPH) (FR) (EC 1.5.1.30) (Biliverdin reductase B) (BVR-B) (EC 1.3.1.24) (Biliverdin-IX beta-reductase) (Green heme-binding protein) (GHBP) (NADPH-dependent diaphorase) (NADPH-flavin reductase) (FLR)	1319	1650	1379	1782	1696	1211	1794	1197	1260	1471	6274	2937	6234	2214	3775	0	0	0	0	0
IPO7_HUMAN	Platelet basic protein (PBP) (C-X-C motif chemokine 7) (Leukocyte-derived growth factor) (LDGF) (Macrophage-derived growth factor) (MDGF) (Small-inducible cytokine B7) [Cleaved into: Connective tissue-activating peptide III (CTAP-III) (LA-PF4) (Low-affinity platelet factor IV); TC-2; Connective tissue-activating peptide III(1-81) (CTAP-III(1-81)); Beta-thromboglobulin (Beta-TG); Neutrophil-activa…	1319	983	923	933	1230	2631	3070	3851	3136	4592	883	967	1075	1164	1163	0	0	0	0	0
PDIA3_HUMAN	Rho-associated protein kinase 1 (EC 2.7.11.1) (Renal carcinoma antigen NY-REN-35) (Rho-associated, coiled-coil-containing protein kinase 1) (Rho-associated, coiled-coil-containing protein kinase I) (ROCK-I) (p160 ROCK-1) (p160ROCK)	1306	1240	1228	2655	814	1173	1399	969	5820	949	871	722	917	610	1191	0	0	0	0	0
TGM3_HUMAN	Beta-Ala-His dipeptidase (EC 3.4.13.20) (CNDP dipeptidase 1) (Carnosine dipeptidase 1) (Glutamate carboxypeptidase-like protein 2) (Serum carnosinase)	1286	1228	1545	1067	1165	1051	581	895	692	816	707	829	682	1019	3330	0	0	0	0	0
USO1_BOVIN	General vesicular transport factor p115 (Protein USO1 homolog) (Transcytosis-associated protein) (TAP) (Vesicle-docking protein)	1251	1201	1547	1097	910	1231	2180	861	1052	1897	0	0	0	0	0	585	790	1429	774	549
FA9_HUMAN	Attractin (DPPT-L) (Mahogany homolog)	1247	1206	1124	1246	1149	904	1424	1083	1359	1006	3922	4295	4242	4304	3747	0	0	0	0	0
KRT81_BOVIN	Keratin, type II cuticular Hb1 (Keratin-81) (K81) (Type II hair keratin Hb1) (Type-II keratin Kb21)	1243	764	1560	1164	1082	1042	652	967	647	967	0	0	0	0	0	956	1019	1102	317543	974
RELN_HUMAN	Keratin, type I cuticular Ha4 (Hair keratin, type I Ha4) (Keratin-34) (K34)	1239	882	1149	1090	1005	886	895	874	741	809	6118	7109	10704	9935	4507	0	0	0	0	0
CALD1_BOVIN	Non-muscle caldesmon (CDM) (L-caldesmon)	1228	1152	1172	833	935	1293	670	577	1044	888	0	0	0	0	0	1652	1568	1263	1311	19876
KRT35_HUMAN	Leucine-rich repeat-containing protein 15 (Leucine-rich repeat protein induced by beta-amyloid homolog) (hLib)	1226	889	1236	1068	964	962	1509	986	1510	1008	1081	1282	956	877	380215	0	0	0	0	0
MBL2_HUMAN	Anthrax toxin receptor 2 (Capillary morphogenesis gene 2 protein) (CMG-2)	1223	826	729	1108	1188	1169	654	1147	640	1119	5540	4481	5801	6227	4953	0	0	0	0	0
BGH3_HUMAN	Platelet-activating factor acetylhydrolase (PAF acetylhydrolase) (EC 3.1.1.47) (1-alkyl-2-acetylglycerophosphocholine esterase) (2-acetyl-1-alkylglycerophosphocholine esterase) (Group-VIIA phospholipase A2) (gVIIA-PLA2) (LDL-associated phospholipase A2) (LDL-PLA(2)) (PAF 2-acylhydrolase)	1223	506	453	1116	860	841	892	836	629	799	3889	883	765	4742	4225	0	0	0	0	0
GSTP1_HUMAN	Mannose-binding protein C (MBP-C) (Collectin-1) (MBP1) (Mannan-binding protein) (Mannose-binding lectin)	1203	1121	1088	1758	1196	777	656	703	1011	1017	3108	1479	1705	2094	1364	0	0	0	0	0
CXCL7_HUMAN	Protein kinase C and casein kinase substrate in neurons protein 2 (Syndapin-2) (Syndapin-II) (SdpII)	1188	893	881	1332	1225	954	968	995	1031	1149	16863	17233	15725	17303	19206	0	0	0	0	0
ROCK1_HUMAN	Dynactin subunit 1 (150 kDa dynein-associated polypeptide) (DAP-150) (DP-150) (p135) (p150-glued)	1147	665	719	1056	786	1340	1527	1172	1243	1666	1014	856	879	687	836	0	0	0	0	0
KRT36_HUMAN	Corneodesmosin (S protein)	1139	821	756	1548	1043	967	680	1029	677	1083	982	1415	1490	1727	30369	0	0	0	0	0
STIP1_BOVIN	Stress-induced-phosphoprotein 1 (STI1) (Hsc70/Hsp90-organizing protein) (Hop)	1137	2408	2649	2492	2382	2375	2022	2717	2415	2896	0	0	0	0	0	533	1925	25156	1700	18737
MASP2_HUMAN	Carboxypeptidase B2 (EC 3.4.17.20) (Carboxypeptidase U) (CPU) (Plasma carboxypeptidase B) (pCPB) (Thrombin-activable fibrinolysis inhibitor) (TAFI)	1121	868	990	1498	1133	1040	1072	1047	1032	1090	34481	31173	33046	48496	18370	0	0	0	0	0
LACB_BOVIN	Beta-lactoglobulin (Beta-LG) (allergen Bos d 5)	1098	985	873	906	1412	1138	855	1023	871	1194	0	0	0	0	0	1264	917	71901	29603	78887
AMD_HUMAN	Kinectin (CG-1 antigen) (Kinesin receptor)	1074	1294	1462	1512	1265	1135	721	1106	720	1074	6752	11131	9877	9246	6010	0	0	0	0	0
SPB3_HUMAN	Complement factor H-related protein 5 (FHR-5)	1073	1066	856	573	923	923	1024	863	947	803	870	751	804	711	3557	0	0	0	0	0
RIR1_HUMAN	Mucin-5B (MUC-5B) (Cervical mucin) (High molecular weight salivary mucin MG1) (Mucin-5 subtype B, tracheobronchial) (Sublingual gland mucin)	1072	775	722	753	828	954	1196	1087	1351	1319	954	1105	982	1054	810	0	0	0	0	0
LYSC_HUMAN	Cystatin-C (Cystatin-3) (Gamma-trace) (Neuroendocrine basic polypeptide) (Post-gamma-globulin)	1050	1026	1061	1106	911	952	1216	1039	1165	875	1116	1837	1321	1240	7606	0	0	0	0	0
CAN2_BOVIN	Calpain-2 catalytic subunit (EC 3.4.22.53) (Calcium-activated neutral proteinase 2) (CANP 2) (Calpain M-type) (Calpain-2 large subunit) (Millimolar-calpain) (M-calpain)	1047	1320	1823	1775	1857	1845	1704	2502	1828	3461	0	0	0	0	0	1439	1570	2129	1588	1942
ANK1_HUMAN	Proline-rich acidic protein 1 (Epididymis tissue protein Li 178) (Uterine-specific proline-rich acidic protein)	1043	1247	736	1435	1074	869	1164	944	920	1166	2891	2985	4201	4691	2654	0	0	0	0	0
HORN_HUMAN	Proprotein convertase subtilisin/kexin type 9 (EC 3.4.21.-) (Neural apoptosis-regulated convertase 1) (NARC-1) (Proprotein convertase 9) (PC9) (Subtilisin/kexin-like protease PC9)	1040	735	995	1062	854	984	807	861	704	813	1092	1316	1065	816	1408	0	0	0	0	0
ITB2_HUMAN	Serum paraoxonase/lactonase 3 (EC 3.1.1.2) (EC 3.1.1.81) (EC 3.1.8.1)	1026	891	612	1039	921	2085	1516	682	1556	900	8584	5230	6091	2625	2592	0	0	0	0	0
SDCB1_HUMAN	Syntenin-1 (Melanoma differentiation-associated protein 9) (MDA-9) (Pro-TGF-alpha cytoplasmic domain-interacting protein 18) (TACIP18) (Scaffold protein Pbp1) (Syndecan-binding protein 1)	1023	1501	1306	1374	1568	1472	922	973	838	1080	5316	6922	5520	7874	2211	0	0	0	0	0
XPO1_HUMAN	Mannan-binding lectin serine protease 2 (EC 3.4.21.104) (MBL-associated serine protease 2) (Mannose-binding protein-associated serine protease 2) (MASP-2) [Cleaved into: Mannan-binding lectin serine protease 2 A chain; Mannan-binding lectin serine protease 2 B chain]	1022	982	834	1495	1141	1933	1862	2266	1283	2609	779	798	870	774	918	0	0	0	0	0
DRA_HUMAN	Keratin, type II cuticular Hb5 (Hair keratin K2.12) (Keratin-85) (K85) (Type II hair keratin Hb5) (Type-II keratin Kb25)	1020	904	970	1104	704	810	1024	759	874	982	2840	1879	4039	1846	2301	0	0	0	0	0
CASA2_BOVIN	Alpha-S2-casein [Cleaved into: Casocidin-1 (Casocidin-I)]	975	851	1012	1423	3008	969	829	963	824	958	0	0	0	0	0	1196	1836	19605	668	695
DCTN1_HUMAN	Calpain-1 catalytic subunit (EC 3.4.22.52) (Calcium-activated neutral proteinase 1) (CANP 1) (Calpain mu-type) (Calpain-1 large subunit) (Cell proliferation-inducing gene 30 protein) (Micromolar-calpain) (muCANP)	963	511	622	948	763	2374	2882	2715	1857	4070	1089	1082	795	774	885	0	0	0	0	0
BPIB1_BOVIN	BPI fold-containing family B member 1 (Long palate, lung and nasal epithelium carcinoma-associated protein 1) (von Ebner minor salivary gland protein) (VEMSGP)	951	1202	1095	1734	1323	2745	2319	3184	3507	3328	0	0	0	0	0	839	882	972	740	765
GSTM1_BOVIN	Glutathione S-transferase Mu 1 (EC 2.5.1.18) (GST class-mu 1) (GSTM1-1)	941	1710	1521	1178	1384	3486	3480	3434	3768	4330	0	0	0	0	0	903	728	741	690	631
MYG_BOVIN	Myoglobin	939	1165	1339	1411	1034	1169	1056	981	1188	1208	0	0	0	0	0	1037	911	673	560	539
PROC_HUMAN	Glutathione S-transferase P (EC 2.5.1.18) (GST class-pi) (GSTP1-1)	938	686	1306	1363	1208	877	815	947	545	1112	4911	6635	4472	4858	4887	0	0	0	0	0
SCFD1_HUMAN		928	1369	1262	1028	686	652	1215	850	991	728	727	601	657	675	686	0	0	0	0	0
GDE_HUMAN	Vitamin K-dependent protein C (EC 3.4.21.69) (Anticoagulant protein C) (Autoprothrombin IIA) (Blood coagulation factor XIV) [Cleaved into: Vitamin K-dependent protein C light chain; Vitamin K-dependent protein C heavy chain; Activation peptide]	905	947	662	1359	1218	1762	2444	2039	1352	2145	862	631	732	1030	838	0	0	0	0	0
SG2A1_HUMAN	Hornerin	904	742	877	795	856	836	1238	879	1272	919	1127	1065	952	697	682	0	0	0	0	0
KRT35_BOVIN	Keratin, type I cuticular Ha5 (Keratin-35) (K35)	890	970	1008	1063	1084	1063	973	1128	825	1054	0	0	0	0	0	946	1058	990	1293	795
RENBP_BOVIN	N-acylglucosamine 2-epimerase (AGE) (EC 5.1.3.8) (GlcNAc 2-epimerase) (N-acetyl-D-glucosamine 2-epimerase) (Renin-binding protein) (RnBP)	880	1035	465	689	953	826	1633	1335	1148	1408	0	0	0	0	0	875	985	44125	41446	37053
EZRI_BOVIN	Ezrin (Cytovillin) (Villin-2) (p81)	840	1321	1335	1087	1053	1078	593	1024	563	973	0	0	0	0	0	1051	963	26573	1528	4385
PAFA_HUMAN	Spectrin beta chain, erythrocytic (Beta-I spectrin)	834	14881	10878	823	860	736	650	701	612	1086	4276	4065	5844	2685	2818	0	0	0	0	0
GNAS3_BOVIN	Neuroendocrine secretory protein 55 (NESP55) [Cleaved into: LSAL tetrapeptide; GAIPIRRH peptide]	805	859	1067	1119	1597	977	819	1165	918	1588	0	0	0	0	0	1274	1544	1697	1013	672
CAN1_HUMAN	HLA class II histocompatibility antigen, DR alpha chain (MHC class II antigen DRA)	796	798	843	917	721	949	660	920	642	843	4306	3978	3959	4437	3499	0	0	0	0	0
CAN1_BOVIN	Calpain-1 catalytic subunit (EC 3.4.22.52) (Calcium-activated neutral proteinase 1) (CANP 1) (Calpain mu-type) (Calpain-1 large subunit) (Micromolar-calpain) (muCANP)	790	1080	1247	1437	1746	1740	1162	1888	2626	3224	0	0	0	0	0	1570	1899	24525	31146	630
SBSN_HUMAN	Complement factor H-related protein 4 (FHR-4)	790	673	874	967	879	950	646	926	574	890	688	984	884	1075	2603	0	0	0	0	0
FAS_BOVIN	Fatty acid synthase (EC 2.3.1.85) [Includes: [Acyl-carrier-protein] S-acetyltransferase (EC 2.3.1.38); [Acyl-carrier-protein] S-malonyltransferase (EC 2.3.1.39); 3-oxoacyl-[acyl-carrier-protein] synthase (EC 2.3.1.41); 3-oxoacyl-[acyl-carrier-protein] reductase (EC 1.1.1.100); 3-hydroxyacyl-[acyl-carrier-protein] dehydratase (EC 4.2.1.59); Enoyl-[acyl-carrier-protein] reductase (EC 1.3.1.39); Acy…	776	1760	493	919	768	1034	1347	928	1884	792	0	0	0	0	0	952	1176	1966	1681	500
IBP3_BOVIN	Insulin-like growth factor-binding protein 3 (IBP-3) (IGF-binding protein 3) (IGFBP-3)	760	769	643	727	645	656	1388	634	1106	920	0	0	0	0	0	1005	22472	24516	15925	106486
SEPT9_HUMAN	Serpin B3 (Protein T4-A) (Squamous cell carcinoma antigen 1) (SCCA-1)	749	1690	598	1243	927	1139	2001	1267	1789	2154	1423	1084	1075	929	977	0	0	0	0	0
RS14_HUMAN	40S ribosomal protein S14 (Small ribosomal subunit protein uS11)	689	1138	950	1122	2390	1033	1501	1446	810	1911	6012	6061	7097	7339	4268	0	0	0	0	0
CLIP1_HUMAN	C-1-tetrahydrofolate synthase, cytoplasmic (C1-THF synthase) (Epididymis secretory sperm binding protein) [Cleaved into: C-1-tetrahydrofolate synthase, cytoplasmic, N-terminally processed] [Includes: Methylenetetrahydrofolate dehydrogenase (EC 1.5.1.5); Methenyltetrahydrofolate cyclohydrolase (EC 3.5.4.9); Formyltetrahydrofolate synthetase (EC 6.3.4.3)]	685	870	1194	929	1094	869	916	1097	575	917	852	866	1126	918	869	0	0	0	0	0
KRT34_HUMAN	Keratin, type I cuticular Ha5 (Hair keratin, type I Ha5) (Keratin-35) (K35)	657	917	570	946	986	932	2626	1292	738	973	959	884	778	1176	3162	0	0	0	0	0
KTN1_HUMAN	Importin-5 (Imp5) (Importin subunit beta-3) (Karyopherin beta-3) (Ran-binding protein 5) (RanBP5)	573	661	630	988	1258	1485	1835	1420	965	1919	1316	1203	866	842	593	0	0	0	0	0
FHR5_HUMAN	Integrin beta-2 (Cell surface adhesion glycoproteins LFA-1/CR3/p150,95 subunit beta) (Complement receptor C3 subunit beta) (CD antigen CD18)	567	545	791	1010	923	923	549	918	543	902	5880	1132	2047	1236	10610	0	0	0	0	0
RET4_HUMAN	Reelin (EC 3.4.21.-)	359	1097	752	2278	1009	1007	568	1006	567	1006	1796	1685	1571	1700	3798	0	0	0	0	0
