# Supplementary material for: Sources of biases in the in vitro testing of nanomaterials: the role of the biomolecular corona
Source: Royal Society of Chemistry journal article supplement (doi:10.1039/d3nh00510k), 2024-01-01
Supplement: d3nh00510k3.xlsx [file d3nh00510k3.xlsx]

## Sheet: GO
Unannotated Feature	Medium_1	Medium_2	Medium_3	Medium_4	Medium_5	Plasma_1	Plasma_2	Plasma_3	Plasma_4	Plasma_5	Medium1h_1	Medium1h_2	Medium1h_3	Medium1h_4	Medium1h_5	Medium24h_1	Medium24h_2	Medium24h_3	Medium24h_4	Medium24h_5
5.3761_680.4818	0	0	0	0	0	4920.48	0	0	0	0	0	0	0	0	5736.77	0	0.3499	0	0	7517.03
5.3681_663.4551	8368.85	10700.1	8731.48	8315.45	7835.11	90533.9	0	0	0	0	0	0	0	0	108864	0	0.4332	0	0	132944
5.5372_663.4541	0	0	0	0	0	0	33004.3	13891	18133.6	32843	42684.6	37734.1	18938.3	36097.4	0	9597.81	41586.4	30447.3	36685.2	0
7.4634_369.3511	0	0	0	0	0	0	3323	0	3914.73	3635.24	0	0	0	0	0	0	0	0	0	0
9.301_369.3519	0	0	0	0	0	4751.21	3679.72	4163.25	4166.59	5422.01	4178.1	4387.11	3591.34	3665.18	3617.34	3992.55	3239.41	4027.13	3319.53	3675.28
9.1898_369.3521	0	0	0	0	0	0	0	0	5983.21	5422.01	4178.1	4387.11	3591.34	0	2952.13	3008.49	0	0	2578.48	2182.19
7.249_369.3523	0	0	0.284	0.4559	0	12197	0	0	0	0	0	0	0	0	5368.56	0	0	0	0	4425.81
6.5841_369.3525	0	0	0	0	0	0	0	0	0	0	0	0	0	0	2706.2	0	0	0	0	10929.6
5.3682_515.4153	0	0	0	0	0	1922.53	0	0	0	0	0	0	0	2.546	2703.48	0	0	0	1.1761	5203
4.5651_531.4076	69.2922	73.33	74.4086	63.5556	78.0095	3045.12	0	0	0	0	0	0	0	0	6039.36	0	0	0	0	11427.2
4.602_570.5468	543.837	0	0	0	0	1817.33	0	0.5411	0	0	0	0	0	0	1837.1	0	0	0	0	2191.37
2.9753_637.3067	0	0	0	0	0	878.534	0	0	0	0	0	0	0	0	1058.86	0	0	0	0	2636.01
9.1845_666.6191	0	0	0	0.0649	0	29439.7	8690.72	10611.6	10942.6	10969.4	7322.74	6310.64	5897.79	5464.93	17506.3	3789.91	3491.18	4431.48	3453.3	11776.3
9.3415_668.6341	0	0	0	0	0	7536.63	2511.03	3414.99	3404.84	3499.8	2606.24	2505.13	2127.47	1900.37	5296.37	2204.17	0	2536.37	2083.44	5146.34
9.2305_675.679	839.406	1095.5	801.689	742.589	678.333	2572.06	0	0	0.3632	0	0.4452	0	0	0	2655.04	0	0	0	0.1763	2678.96
4.8782_703.5754	2033.32	2641.32	0	2083.44	1857.51	38324.8	39126.9	14820.2	44002.9	41673.9	31120.6	30851	10681.5	27644.1	25462.5	14642.9	34585.6	40877	35793.6	30365.8
9.0569_707.6484	0	0.3593	1.7685	0	0	2805.99	0	0	0	0	0	0	0.8862	0	1764.9	0	0	0	0	1424.62
5.5429_721.5085	0.1712	0	0	0	0	0	7931.24	2587.81	5559.74	8204.77	9525.89	8867.18	3525.57	9053.29	0	2833.38	9444.86	7784.29	8550.51	0
5.3881_721.5107	0	0	0	0	0	42645	0	0	0	0	0	0	0	0	45859.4	0	0	0	0	55988.8
7.3524_721.6251	2.4674	0	0	2.2191	0.1516	1098.46	0	0.3986	1.4052	0	0	0	0	0	5058.35	0.4919	0.1064	0	0	7192.77
4.9112_729.5897	0	0	0	0	0	2677.44	0	0	2145.03	2116.93	0	0	0	0	0	0	0	0	0	0
5.2941_731.6043	0	0	0	0	0	4066.41	2223.74	0	2417.96	2563.36	0	0	0	0	2263.61	0	0	2450.24	2046.12	3571.52
5.3575_736.5438	23921.4	28532	24522.4	23760.3	22670.9	2480.33	0	0	0	0	0	0	7.9063	0	2811.28	11.3426	0	0	0	3407.58
6.5874_738.634	0	0	0	0	0	17.1766	0.9361	0	0	0	0	0	0	0	1420.56	0	0	0	0	4905.37
4.865_738.6478	4614.41	7116.69	4744.92	4835.72	4744.57	11452.8	11235.8	3771.98	11379.3	12546.4	12647.4	11697.2	4496.98	11224.7	11000.2	5733.67	12715.8	11901.1	11244.7	10784.1
5.5389_750.558	0	0	0	0	0	0	6663.86	2121.36	4091.6	6923.69	8662.97	7943.85	2944.96	7423.97	0	2038.08	8499.1	6457.96	7372.39	0
5.388_750.5609	0	0	0	0	0	20195.8	0	0	0	0	0	0	0	0	23256.2	0	0	0	0	28305.8
5.037_752.6101	0	0	0	0	0	2757.82	0	0	0	0	0	0	0	0	2491.7	0	0	0	0	3040.88
5.0639_753.614	19293.9	29198.7	21210.4	20506.9	20305.7	65222.6	33543.4	12287.4	33391.4	38285.7	37040.1	38648.3	15285.1	34416.1	57987.7	17991	39323.8	35348	32459.2	67285.5
5.0326_758.5702	0	0	0	0	0	98710.5	49883.2	21691.5	58449.2	58592	32419.7	29339.1	11025.8	29034.5	46510.6	9974.29	25830.5	26155.9	19757.1	41116.3
5.6712_759.6373	0	0	0	0	0	2198.71	0	0	0	0	0	0	0	0	1262.75	0	0	0	0	1799.61
5.3626_760.5849	0	0	0	0	0	48570.1	26536.2	10026.6	28118.4	29200.4	18036.6	17616.9	6860.37	15770.1	24783.6	8364.87	18321.6	23465.8	19490.8	35541.5
5.5371_764.5739	0	0	0	0	0.0514	0	16442.4	4948.51	9615.7	16674.1	21310.2	19567.2	6866.09	17866.2	0	4675.41	21005.4	15534.5	17821.6	0
5.388_764.5764	0	0	0	0	0	65936	0	0	0	0	0	0	0	1.5852	77189.4	0.4974	0	0	0	93566.1
8.7558_768.7072	0	0	0	0	0	2112.06	0	0	0	0	0	0	0	0	1923.57	0	0	0	0	2718.74
4.9671_782.5691	0	0	0	0	0	19999.1	9471.59	4021.85	10636	11087.5	5118.35	4581.63	0	4803.4	6628.76	0	3982.91	3738.99	2803.1	6512.9
5.1083_784.5851	0	0	0	0	0	18697.6	8412.11	2706.59	8698.89	9033.4	4820.99	3796.07	0	4214.48	7769.47	0	3801.14	4178.91	3231.27	7442.09
5.4599_786.6011	0	0	0	0	0	45592.2	23206.7	9073.7	25316.9	26570	15066.7	13421.7	5449.65	13182.8	20424.7	5531.31	12231.8	16460.5	12715.6	23763
6.357_787.6674	0	0	0	0	0	0	1993.43	1076.4	2269.96	2239.39	1843.06	1716.98	869	1553.22	0	1072.23	1798.93	2671.77	2231.28	0
6.1674_787.6682	0	0	0	0	0	3196.98	0	0	0	0	0	0	0	0	2234.74	0	0	0	0	2996.6
5.8609_788.6153	0	0	0	0	0	0	3106.78	1531.02	3539.87	3638.41	3013.68	2906.09	1410.63	2669.47	0	1865.59	3363.78	4819.62	4297.54	0
5.6992_788.6187	0	0	0	0	0	5150.35	0	0	0	0	0	0	0	0	3511.11	0	0	0	0	5987.88
8.9723_794.7224	0	0	0	0	0	0	0	2186.57	2466.69	2366.9	1944.81	1446.34	1329.78	1508.53	0	1336.22	1089.46	2286.56	0	0
8.7688_794.7236	0	51.7024	0	16.5297	0	6328.89	0	0	0	0	0	0	0	0	4531.13	0	0	0	0	5476.6
9.1097_796.7378	0	0	0	0	0	4867.77	1918.95	2300.94	2434.51	2243.7	1954.14	0	0	0	4553.38	0	0	2379.19	0	5533.78
8.9868_796.7391	116.682	175.783	128.058	126.645	170.534	4873.36	0	143.002	0	0	0	0	0	0	4531.65	0	0	0	0	5541.78
4.8635_806.5691	0	0	0	0	0	8508.08	4657.74	1953.94	5540.76	5760.51	2681.03	2345.82	0	2414.58	3299.49	0	2499.92	2315.47	1883.34	2968.08
5.3911_810.5998	0	0	0	0	0	8052.36	4207.57	0	4498.31	4945.24	2608.97	2407.63	0	2306.63	3474.39	0	2305.67	2688.9	2289.08	4078.62
9.0797_810.753	174.932	213.671	159.658	138.278	202.64	1707.73	0	65.3697	32.0538	0	0	0	11.1236	0	2221.8	7.1257	1.5991	13.8734	8.6685	2934.68
5.7153_811.6682	0	0	0	0	0	2930.21	0	0	0	0	0	0	0	0	1653.24	0	0	0	0	2282.08
5.4542_812.6159	0	0	0	0	0	2284.96	0	0	0	0	0	0	0	0	1319.6	0	0	0	0	1889.82
6.3261_813.6826	0	0	0	0	0	0	3877.37	1879.4	4343.96	4095.79	3255.72	2861.7	1406.43	2620.38	0	1663.13	2894.42	4610.15	3964.68	0
6.1429_813.6847	0	0	0	0	0	6586.01	0	0	0	0	0	0	0	0	4207.98	0	0	0	0	5528.5
8.9756_820.7376	0	0	0	0	0	0	4741.16	5393.4	6247.64	6058.62	4228.64	3263.93	2950.06	3070.29	10998.3	2452.79	1958.39	4328.58	3183.98	0
8.7959_820.7397	0	0	0	0	0	17315.4	0	0	0	0	0	0	0	0	11009.6	0	0	0	0	10606.7
9.1328_822.7544	0	0	0	0	0	24465.5	10651.2	12578.8	13970.4	12983.9	10570.2	8804.05	7845.87	7757.58	17548.6	8835.4	6602.8	13174.9	9690.83	19081.7
8.9919_822.7559	106.506	0	92.0433	0	77.4155	24466.1	0	539.865	0	579.778	412.996	313.397	291.264	232.783	17564.4	233.964	177.915	0	307.745	19116.3
9.305_824.7692	0	0	0	0	0	0	2378.08	3196.22	3056.56	3090.36	2827.18	2628.48	2210.32	2202.83	0	2941.74	2210.84	3324.2	2730.47	0
9.1731_824.772	272.107	345.15	291.918	249.179	316.942	5032.98	0	726.635	1120.62	1124.15	764.005	0	449.763	482.882	4606.86	474.336	483.649	831.869	522.416	5180.44
9.1345_829.7981	0	0	0	0	0	0	6962.24	7428.02	7183.6	8586.04	8599.77	8605.41	7376.43	6931.31	19187.2	8893.2	7690.32	7965.94	7147.01	19143.2
8.9813_829.7994	8747.94	11821.2	8508.19	7749.96	7875.89	17709.5	0	0	0	0	0	0	0	0	19186.6	0	0	0	0	19141.1
8.92_834.7547	0	0	0	0	0	3817.75	0	0	0	0	1.4426	0	0	0	2820.62	0	0	0.7384	0	2570.81
9.2479_836.7684	0.7591	0	0	0	0	0	2334.33	2956.27	3029.31	2899.44	2456.87	2211.89	1947.4	1976.76	0	2152.19	1731.36	2887.27	2148.74	0
9.0995_836.7708	95.3788	0	33.6202	24.1124	0	5347.84	0	39.7773	0	0	0	0	15.2398	0	4196.47	0	0	0	0	4566.12
8.9716_846.7537	0	0	0	0	0	31131.6	7877.42	8663.24	10193	10025.2	6220.84	4567.15	4148.85	4381.89	17954.5	2722.09	0	4679.11	3393.75	13048.7
9.146_848.7702	0	0	0	0	0	64312.8	31436.2	37667.5	41614.1	38906.2	30002.8	25463.1	22089.8	21489.1	44690	22630.3	16899.7	32509.7	24030.2	43917
9.3125_850.7854	0	12.6431	0	0	0	0	24982.6	31623.4	31805.1	31011.9	26604	23988.6	20227.8	19612.7	0	25493.7	19276.2	31396.7	24555.8	0
9.1717_850.7879	212.033	300.509	197.972	195.867	196.237	43913.4	732.346	909.912	1001.94	961.921	723.415	903.674	614.886	713.198	34243.6	662.822	272.7	868.51	0	34826.2
9.3651_852.8011	0	0	0	0	0	3625.34	0	776.408	0	475.285	0	0	0	0	2996.94	0	0	815.138	0	3341.53
8.929_860.7699	2.2972	0	0	0	0	4088.29	0	4.6388	0	0	0	1.2023	1.1939	0	2670.07	0	0	0	0	1874.3
9.22_862.7848	0	0	0	0	0	10245	3361.99	4312.54	4445.72	4411.64	3289.95	2810.53	2500.92	2470.23	7286.5	2579.21	0	3750.36	2820.27	7195.94
9.3296_864.8002	0	0	0	0	0	2331.72	0	1795.71	1994.76	1793	0	0	0	0	1765.33	0	0	1835.3	0	1843.16
9.0476_872.7687	0	0	0	0	0	0	15805	19659.1	21687	20875.3	11286.7	8498.33	8068.16	7486.21	0	4031.05	2936.79	5914.49	4086.12	0
8.8577_872.7715	0	25.6062	0	10.3623	5.0518	64180.7	0	90.2241	90.274	86.2591	49.5991	25.7677	30.9333	41.8282	34144	16.8299	9.5659	33.5709	14.8772	18692.8
9.1766_874.7852	0	0	0	0	0	121765	66064.1	80096.1	88015	81951.8	58538.8	51510.3	43367	41591.4	79147.4	35304.3	26751.4	46280.8	34655.8	58425.3
9.3161_876.8007	0	0	0	0	0	0	80899.7	100867	102717	101652	83756.1	76526.6	62535.5	62201.8	0	77087.9	58952.1	94022.4	74504	0
9.1771_876.8031	205.756	262.199	211.562	192.659	204.851	131306	0	0	0	0	0	0	0	0	104376	0	0	0	0	105608
9.404_878.8167	0	0	0	0	0	17470.3	2837.65	5010.16	3772.41	4586.88	3834.06	3258.66	2644.57	3103.07	12983.6	2996.11	2316.57	4774.06	2957.95	11794.5
8.8125_888.7953	0	0	0	0	0	3273.73	6.6875	0	0	10.1571	3.1088	0	0	0	1725.49	0.0731	0	0	0	1242.69
9.1124_888.8027	0	8.7972	0	4.0642	0	4649.12	0	0	0	0	0	0	0	0	3051.68	0	0	0	0	2327.18
9.0163_889.7999	0	0	0	0	0	7065.1	203	238.169	299.62	250.45	211.333	179.187	126.877	151.455	4832.38	103.776	89.5391	0	0	4094.42
9.328_890.8159	0	0	0	0	0	2918.15	0	2084.73	2231.57	2050.31	0	0	0	0	2228.94	0	0	1909.79	0	2217.71
9.1954_891.8159	0	0	0	0	0	5593.94	0	0	0	0	0	0	0	0	3904.95	0	0	0	0	3924.87
9.068_898.7834	0	0	0	0	0	0	4846.6	5718.73	6446.33	6359.1	3431.08	2564.88	2472.41	2406.03	0	1314.18	931.724	1788.28	1286.26	0
8.867_898.787	0	25.8262	4.1291	0	32.7473	16940.2	0	0	50.9482	64.5792	0	0	0	0	8920.07	0	0	65.7226	39.7584	4950.81
9.1912_900.8002	0	0	0	0	0	21578.8	11168.6	13669.6	14905.3	14163.3	9752.05	8698.62	7530.6	7149.4	14145	6076.44	4682.32	7102.36	5408.72	9911.41
9.3193_902.8165	0	0	0	0	0	30736.3	23800.3	28668.8	29474.9	29377.7	24767.6	24039.1	19417	19692.6	29979.6	23536.6	19105.8	23208.6	20056.1	32890.5
9.189_902.8195	203.199	226.857	192.006	228.678	201.726	30817.7	0	0	0	0	0	0	0	0	29991.9	0	0	0	0	36593.3
9.4095_904.8321	0	0	0	0	0	20962.9	6096.12	8356.99	7976.01	7944.15	6276.28	5465.99	4568.92	4570.68	15123.4	4985.51	3768.26	7589.16	5420.25	14002.4
9.4303_906.8486	25.6052	73.9386	30.219	0	19.1429	2929.21	0	0	0	0	0	0	0	0	2286.61	0	0	0	211.288	2139.01
8.8489_913.7982	2.4715	0	0	0	0.2343	3608.75	53.7934	57.3975	74.3787	59.021	22.7361	22.9575	13.6055	14.1887	1788.52	3.5354	0	11.9617	3.0241	0
8.8555_914.811	0	0	0.3885	0	3.7375	5757.26	4.8738	10.5059	0	10.0827	0	1.6662	0	2.293	2941.85	0	0	0	0	1650.96
9.0455_915.8154	0	0	0	0	0	9015.26	252.018	0	363.572	0	0	227.251	207.504	0	5939.56	148.986	0	173.96	0	4191.89
9.1988_916.8261	0	0	0	0	0	0	1741.32	2179.82	2304.28	2191.21	1766.62	1776.98	1398.31	1385.03	0	1386.5	1067.28	1480.63	1173.13	0
9.1771_917.8319	0	0	0	0	0	10096	0	0	705.63	647.038	475.489	0	0	0	6978.81	0	0	380.915	0	7698.25
9.321_918.8431	0	0	0	0	0	0	2345.06	2904.2	3040.52	2923.57	2476.09	2406.07	1876.2	1849.38	0	2578.74	1960.47	2608.93	2128.19	0
9.3176_930.8479	7.4839	12.4719	10.573	9.6981	4.5803	2201.01	0	0	0	0	0	0	0	0	2327.24	0	0	0	0	2335.91
9.1966_943.8459	0	0	0	0	0	2386.46	0	0	0	69.5649	74.0376	0	0	0	2170.87	0	34.9519	0	0	2356.4
9.0444_958.8815	0	0	0	0	0	2332.68	0	0	20.3196	0	0	7.0242	0	0	1745.15	2.4095	0	0	0	1467.75
9.1861_960.8957	1.4802	0	0	0	0	3614.85	26.5112	33.0969	43.7099	13.1242	15.2003	35.0803	0	0	2819.81	21.6919	12.6351	6.4564	13.6907	2864.56
1.1598_339.1995	1840.29	3699.31	2933.27	4324.48	5264.73	0	1461.01	650.49	728.465	3130.11	2587.52	4476.45	686.555	741.925	684.141	3415.57	3059.42	1220.62	2429.54	2358.66
3.3586_255.2324	647.323	903.606	927.712	1047.48	1343.2	0	1372.97	1058.77	1319.97	2996.01	1103.3	4290.27	915.825	822.342	964.241	1444.11	2899.78	857.853	1852.36	1802.15
3.4433_281.2476	0	0	0	0	0	0.2492	480.23	438.027	572.181	672.568	184.667	1214.79	327.045	298.879	420.884	262.236	616.585	239.235	450.421	467.107
3.9722_283.2634	758.38	1165.55	1063.86	1167.24	1836.96	9.2667	1683.17	1324.6	1682.82	3358.01	1641.31	4097.62	1183.49	1041.24	1374.69	1967.88	3189.53	1187.07	2288.65	2077.33
4.2074_297.2793	1697.78	1723	1561.18	1578.13	1767.36	0	4051.82	3522.15	4027.47	4229.33	3946.78	3536.77	3818.25	3455.26	3623.19	3798.76	3804.96	3041.48	4140.59	3582.68
2.8164_303.2319	0	0	0	0	0	0	604.967	1067.85	1286.44	527.554	72.7042	52.3089	523.573	506.168	849.839	91.0671	528.746	362.09	500.129	541.493
2.6441_327.2324	0	0	0	0	0	0	508.904	670.164	920.657	379.113	42.3883	0	435.65	381.75	700.572	43.3043	380.417	284.122	391.632	389.316
1.1534_337.2049	0	0	0	0	0	0	103.555	84.684	172.105	549.175	158.056	407.846	77.0337	159.06	177.298	238.027	459.571	193.613	312.335	249.151
3.2579_465.3031	0	0	0	0	0	0	595.415	573.729	809.347	862.206	932.408	925.645	654.999	443.368	617.259	876.382	808.698	560.17	746.684	736.8
4.177_505.3291	0	0	0	0	0	5.5915	302.975	81.9624	40.7208	326.649	718.059	701.491	72.7523	64.7505	41.1396	723.607	359.929	241.858	303.734	331.429
1.7742_513.3682	658.927	574.452	611.662	626.218	718.987	0	0	0	0	0	0	0	0	0	0	0	0	0	0	0
4.7981_531.3483	0	0	0	4.3576	0	0.394	579.645	552.509	667.881	726.941	888.631	874.394	519.582	479.475	636.654	734.308	716.038	568.775	776.248	737.01
1.4365_540.3298	0	0	0	0	0	0.38	3216.44	3437.81	4047.21	3810.04	5067.92	5093.26	2870.54	2234.54	3378.79	5496.97	3567.46	2549.55	3938.44	3878.36
4.7983_544.3492	0	0	0	0	0	0	983.261	896.611	958.064	1052.58	1262.05	1180.48	800.908	842.221	858.927	1079.54	932.029	927.763	996.951	936.524
4.7989_545.3458	0	0	0.9656	0	0	0	2373.47	2086.91	2265.64	2503.59	3045.59	2761.42	1941.68	2008.85	2001.98	2556.17	2365.56	2197.18	2467.34	2291.73
5.427_555.44	0	0	0	0	0	0	225.833	780.66	914.607	417.607	82.3224	141.683	947.82	704.192	879.446	80.8996	387.31	208.235	363.608	441.775
1.1251_564.3297	0	0	0	0	0	0	652.866	711.668	503.537	537.994	47.7157	236.223	523.343	360.45	596.447	15.6735	540.467	598.659	291.512	638.032
1.6677_566.345	0	0	0	0	0	0	1428.08	1366.32	1690.91	1060.25	360.93	353.728	1134.04	904.755	1335.02	447.393	1046.12	967.568	876.074	1020.57
2.4771_568.3606	0	0	0	0	0	0	2742.55	3304.99	4143.27	3267.91	3861.73	3860.41	3001.79	2226.71	3287.82	4142.14	3299.83	2283.3	3375.73	3348.77
1.7025_573.3891	1107.25	994.513	1006.44	1012.74	1189.38	0	1908.29	1836.65	1955.5	1917.07	1909	1784.93	1978.59	1720.84	1757.74	1790.5	1881.76	1665.13	1962	1969.28
5.499_596.5246	520.452	0	0	0	594.454	0	1477.16	1306.01	1375.67	1466.22	1470.5	1410.95	1315.9	1166.84	1167.73	1344.41	1375.58	1156.49	1554.85	1553.97
4.5717_597.4501	0	0	0	0	0	0.055	92.0781	563.432	831.515	233.693	0	0	761.5	516.808	735.003	2.4766	240.423	62.0625	311.63	307.835
4.5488_609.4511	0	0	3.5214	0	0	0	47.6615	596.94	950.893	212.605	0	28.0593	725.027	432.166	845.947	3.7926	239.368	38.8467	301.021	257.777
4.5145_650.4023	693.077	857.596	519.745	687.738	689.462	0	25.5707	0	0	0	0	0	0	0	0	0	0	0	0	0
1.5533_666.0587	0	0	0	0	0.3175	0.3411	370.09	274.627	985.237	756.002	50.8899	251.44	1347.71	5516.51	394.018	50.3749	694.029	602.2	933.371	910.123
6.7749_666.6027	0	0	0	0	0	0.1744	542.556	520.396	730.409	687.71	840.701	900.828	564.067	305.829	584.432	891.081	744.682	531.619	723.399	690.296
4.329_667.4773	0	0	0	0	0	0	96.4095	0	625.404	227.256	0	0	752.37	460.931	641.146	1.9138	232.224	0	124.625	136.728
7.0468_680.619	0	0	0	0	0	0	482.694	394.76	699.845	643.95	874.051	854.519	570.96	358.063	549.848	958.58	617.587	460.301	694.756	559.998
2.9062_681.2958	0	0	0	0	0	0	443.473	1155.95	823.415	931.155	351.397	2630.95	252.81	462.236	199.514	367.878	942.227	302.207	933.188	1029.43
5.7054_681.5132	0	0	0	0	0	0	1312.56	683.592	652.213	904.329	483.391	498.876	809.75	450.986	580.46	454.184	832.95	1125.26	512.648	527.786
6.1096_683.5273	0	0	0	0	0	0	1830.49	1379.48	1360.2	1175.94	378.586	407.205	2036.08	1075.67	1508.94	373.496	1096.79	1553.26	613.357	574.491
6.7433_692.6191	0	0	0	0	0	0	702.286	676.41	896.624	848.869	1098.31	1090.15	705.076	89.5222	637.169	1176.57	911.603	661.217	934.758	836.538
4.3662_693.4933	0.2713	0	0	0	0	0	284.298	516.816	600.364	334.284	15.0036	0	834.527	458.74	654.759	16.3949	306.86	250.43	134.236	102.973
7.323_694.635	0	4.3399	0	0	0	0	1526.49	1435.16	2045.6	1950.67	2520.11	2743.46	1825.46	1080.2	1670.7	2753.67	1959.55	1456.76	2010.5	1860.82
4.5901_695.507	0	0	0	0	0	0	620.636	300.537	481.741	336.057	0	45.1954	719.434	269.403	464.071	51.4356	294.589	390.11	145.695	149.016
5.7466_707.5315	0	0	0	0	0	0.7473	1195.64	594.43	696.779	811.176	363.288	317.923	850.242	419.192	685.195	367.952	831.223	1075.29	481.545	445.155
6.146_709.5436	0	0.8474	0	0	0	0	1290.94	810.368	846.941	827.51	0	0	1076.18	500.204	817.143	0	744.288	1026.95	401.62	489.865
5.124_709.5506	553.465	518.363	545.813	506.497	584.812	0	528.667	526.172	0	487.59	0	0	505.182	485.689	0	0	503.651	0	503.688	515.844
7.3233_711.6256	0	0	0	0	0	0.6058	384.674	296.707	376.713	413.289	667.885	699.189	241.162	231.375	340.984	682.688	451.267	374.798	417.693	377.906
4.4192_719.5331	0	0	0	0	0	0	1554.69	1623.16	2040.01	1908.9	2244.35	2128.41	1648	1216.01	1614.06	2214.86	1884.86	1535.18	1916.81	1902.25
5.1303_722.5135	0	0	0	0	0	0	327.633	176.252	214.827	336.114	540.848	340.267	201.493	173.495	183.546	505.711	375.832	245.275	412.251	260.25
4.5885_733.5493	0	0	0	0	0	0	1007.74	1195.38	1477.16	1206.96	1365.28	1235.5	1161.52	945.56	1135.24	1329.49	1159.93	906.92	1259.72	1228.48
5.0393_737.5806	627.837	620.714	570.593	576.324	613.703	0	0	0	0	0	0	0	16.9023	10.1925	0	0	0	5.4732	0	5.3158
6.104_737.5964	0	0	0	0	0	13.5795	250.625	504.171	926.796	0	0	204.221	1198.07	553.499	805.089	145.209	422.077	208.85	0	322.045
4.6324_740.5444	3917.42	3624.51	3740.11	3837.64	4333.1	0	3823.02	3701.63	3861.89	3771.89	3484.99	2966.93	3632.62	3380.51	3255.63	3254.43	3618.51	3074.94	3891.82	3727.06
5.7211_741.5684	0	0	0	0	0	0	0	892.152	1375.15	476.788	0	0	1097.09	762.171	1243.09	0	341.713	54.6281	0	361.178
5.4178_742.539	36.1721	0	0	0	0	0	245.673	163.222	170.921	280.183	466.351	472.998	101.048	77.8295	153.619	534.031	245.332	204.65	278.434	366.102
4.4727_745.5487	0	0	0	0	0	0	2162.21	2549.33	3074.02	2617.11	2755.96	2638.34	2460.97	1964.31	2524.37	2574.88	2545.3	2008.92	2695.73	2585.82
4.776_747.5648	554.564	580.988	598.157	598.678	733.577	0	9174.81	10390.6	12775.8	11255.6	12000.6	11970.2	10726.3	8183.34	10914.6	12273.5	10707.1	8405.15	11722.9	11392
4.907_749.5774	0	0	0	0	0	0.3066	225.381	0	377.608	0	105.623	242.173	385.108	0	0	183.37	276.715	147.45	0	214.253
5.5564_750.544	0	0	0	0	0	0	655.555	437.791	467.536	811.71	1166.19	973.558	380.208	302.31	277.502	1184.16	819.748	711.049	777.201	719.496
6.1211_763.6079	0	0	0	0	0	0	648.291	2525.88	3662.79	1433.99	0	0	4447.07	2336.19	3381.13	0	1380.51	473.567	1252.94	1317.27
4.8362_773.5793	16.6448	0	0	0	0	0	589.929	736.192	869.624	707.337	498.414	552.383	699.094	524.807	709.711	630.647	677.356	576.35	705.921	572.461
5.1677_775.5953	0	0	0	0	0	0.2364	2503.69	2783.79	3242.84	2903.19	3036.39	2913.03	2853.37	2294.59	2775.7	3005.6	2804.56	2327.6	2961.71	2843.37
4.8378_782.6364	2081.24	2025.7	2031.8	2006.72	2314.97	0	1264.07	1138.31	1133.55	1184.74	1173.91	1032.49	1209.42	1116.15	1014.37	1085.33	1217.31	1011.85	1272.76	1266.71
5.0793_786.5634	0	0	3.9045	0	0.1604	0	306.514	264.451	305.414	386.371	572.09	451.962	243.605	162.497	227.396	568.118	393.843	366.593	402.747	381.313
6.1631_789.6251	0	0	0	0	0	0	73.862	729.377	1107.66	359.338	0	0	1170.55	701.191	720.13	0	0	97.2206	313.422	375.976
5.0434_796.5966	662.47	674.551	660.931	653.112	661.339	0	0	0	0	0	0	0	0	0	0	0	0	0	0	0
5.0327_797.6028	11754.8	12019.2	11559.3	11671.9	12693	0	8341.08	8547.9	8565.92	8368.39	7553.28	6820.88	8055.96	8018.43	7554.83	7008.86	8008.31	6996.81	8537.52	8537.32
4.6657_800.5424	0	0	0	0	0	0	289.961	123.168	135.299	337.786	563.964	616.044	114.357	30.2135	147.11	602.101	337.307	241.951	344.116	304.166
4.9191_802.5601	0	0	0	65.1764	0	0	14605.1	10707.7	13207.1	16549.7	21881.8	20825.6	11128.6	7878.68	10871.4	21738.3	15694.1	13854.1	17217.2	16726.2
5.6288_803.6276	0	0	0	0	0	0	1423.43	1601.34	1853.55	1731.38	2140.66	2147.91	1629.98	1262.25	1566.52	2143.21	1710.21	1465.34	1875.98	1846.6
5.2162_804.5755	844.393	843.92	846.773	856.925	1119.7	1.4792	9536.98	9630.63	11827	10881.4	12226	11927.4	9529.54	7575.76	9732.85	12128.6	10537.9	9001.22	11215.6	11220.5
5.0776_812.5796	0	0.0863	0	4.8194	0	0.2969	459.085	263.111	351.852	547.899	816.485	731.803	307.804	213.18	236.323	779.025	510.082	432.185	576.382	517.472
5.0994_816.5771	0.4702	0	15.7747	17.4051	9.566	0	351.403	352.207	445.258	517.175	534.091	600.062	258.545	250.834	388.162	561.075	431.71	387.48	515.689	413.622
5.8755_817.6427	0	0	0	0	0	0	739.737	727.291	962.665	859.695	970.132	983.167	801.879	562.069	822.725	939.25	824.785	687.546	739.48	820.512
4.6252_824.5431	0	6.1428	7.1175	0	0	0.0303	237.278	140.897	145.021	371.835	690.194	650.539	87.0869	75.1479	82.4496	662.184	358.638	284.344	375.092	356.218
4.8381_826.56	0	0	0	0	0	0	2942.69	1983.33	2368.38	3475.32	5107.98	4922.51	1948.06	1360.41	1932.5	5090.45	3335.25	2888.54	3635.03	3466.92
4.984_828.5749	0	0	0	0	0	0	3159.42	2220.58	2706.29	3648.02	4967.12	4969.26	1955.25	1274.1	2217.91	5187.49	3578.54	3041.33	3772.77	3483.56
5.6882_829.643	0	0	0	0	0	0	2066.43	2034.61	2568.3	2347.4	2703.93	2557.45	2243.01	1692.52	2144.06	2618.3	2356.8	1988.42	2441.18	2469.25
5.3111_830.5912	0	199.65	193.298	171.64	259.851	0	9866.54	8223.12	10033.8	11595.1	15100.4	14642.5	8394.94	6106.73	8300.67	14867.5	11302.1	9699.25	11921.1	11903
6.1252_831.6596	0	0	0	0	0	0	3054.67	3337.49	4048.08	3528.24	3956.51	4068.77	3472.69	2477.75	3390.02	3965.47	3515.35	2842.32	3669.17	3700.12
5.6521_832.6075	0	0	0	0	700.057	0.0911	3028.03	3498.59	4476.24	3229.06	3004.15	2881.83	3314.72	2655.66	3545.94	2881.07	3218.49	2416.03	3420.98	3509.17
5.925_843.659	0	0	0	14.6796	0	0	1158.41	1285.01	1705.49	1569.6	1530.5	1729.26	1353.49	902.251	1217.76	1650.38	1372.42	1169.24	1463.7	1503.36
6.3782_845.6749	0	0	0	0	0	0.227	1684.23	1786.8	2236.13	1971.07	2214.27	2406.17	1870.13	1258.3	1861.54	2472.74	1875.47	1515.54	2051.96	2063.28
4.4051_850.5429	0	0	0	0	0	0	141.97	70.0779	43.2843	165.408	655.814	815.828	0	0	74.1947	817.194	182.893	115.847	304.346	0
4.7511_850.5602	0	0	0	0	0	0	723.922	615.151	804.672	852.936	1512.84	1397.16	508.849	416.706	531.239	1143.22	840.754	660.978	918.281	849.332
4.8712_852.5756	0	0	0	0	0	0.8187	703.417	846.544	1042.18	883.504	836.755	704.139	575.688	577.688	682.55	701.266	697.148	465.257	989.381	323.969
5.237_854.5914	0	0	0	0	0	0	1891.33	1649.3	2141.25	2523.58	3142.34	2785.58	1385.2	1233.79	1662.91	2969.39	2119.57	2256.98	2333.83	2214.65
5.6746_855.6591	0	0	0	0	0	0	2050.14	2045.85	2441.54	2366.62	2715.96	2611.38	2086.04	1486.88	1992.06	2623.65	2148.8	1995.6	2404.36	2393.44
5.4135_856.6062	0	0	0	0	0	0	1558.4	1506.61	1816.5	1930.18	2166.4	2033.4	1347.14	1077.59	1640.96	2140.65	1770.54	1495.67	1892.13	1745.24
6.0971_857.6752	0	0	0	0	0	0	5365.02	5848.75	7122.62	6299.78	6787.11	7150.5	5937.79	4202.17	5829.01	6757.16	6389.6	5145.23	6648.7	6458.93
6.6397_859.6912	0	0	0	0	0	0	2554.21	2770.12	3396.81	3035.53	3219.93	3278.34	2962.62	2001.8	2802.99	3294.56	2910.91	2305.49	2913.76	3204.97
5.1143_878.5919	0	0	0	0	0	0	754.688	873.787	1135.42	866.405	791.735	731.582	716.116	594.601	785.472	715.21	779.44	472.388	860.407	834.409
Total Area	98835	123951	99349.6	100687	104911	1.4887e+06	759289	658513	893729	914413	751709	705125	477170	571373	1.29964e+06	514650	591478	690710	631671	1.37335e+06
					Avg	SD
				Medium	105547	10561.8
				Plasma	942929	322380
				Medium 1h	761003	320101
				Medium 24h	760372	348592

## Sheet: GNP
	Unannotated Feature	Medium_1	Medium_2	Medium_3	Medium_4	Medium_5	Plasma_1	Plasma_2	Plasma_3	Plasma_4	Plasma_5	Medium1h_1	Medium1h_2	Medium1h_3	Medium1h_4	Medium1h_5	Medium24h_1	Medium24h_2	Medium24h_3	Medium24h_4	Medium24h_5
	5.3539_663.4552	9508.28	8626.02	7926	8172.43	8827.91	20689.8	21113.7	16759.2	19057.1	19725.4	20155.1	23797.9	17013.9	17526.3	19731	31590.5	25226.6	25960	19450.8	20481.8
	6.5227_369.3521	0	0	0	0	0.4752	0	0	0	0	0.0398	0	0	0	0	0	15445.6	10322.3	16156.2	6481.97	11502.9
	5.7771_369.3522	0	24.8324	22.3929	18.1956	25.4175	431.715	359.524	248.931	318.786	311.548	732.919	766.315	505.24	568.406	630.991	2833.68	1430.52	2532.36	1057.92	2077.91
	7.1577_369.3525	0	0	0	2.5231	0	11490.7	9971.25	7416.14	9443.42	10201.3	7057.12	7787.23	5365.26	0	5984.95	0	0	0	0	0
	9.221_369.3526	453.837	399.893	380.853	418.233	387.712	5095.63	4871.04	3941.52	4637.1	5536.78	4785.55	5385.44	4631.65	2928.92	4530.59	4719.69	3943.05	5230.28	2969.51	4057.87
	9.0237_369.3528	0	17.2306	10.4864	9.0975	0	4115.76	3669.1	3017.61	3449.07	4223.17	2996.39	3436.62	2810.7	1638.06	2693.42	1520.24	0	1804.65	969.434	0
	3.7588_391.285	19.1962	19.4862	22.1928	20.9294	24.2971	4909.89	4853.73	3297.88	4151.64	4728.51	2384.39	2559.86	2071.65	1050.73	2145.03	1909.72	1032.33	2041.85	547.857	1243.73
	2.4864_524.3717	0	0	0	0	0	6262.32	6371.56	4578.12	5782.13	6162.25	3234.83	4145.4	3129.38	1780.81	3704.4	4565	4670.08	5850.01	2515.32	4364.65
	4.6047_570.5476	0	0	598.948	0	0	1825.68	2047.98	1495.99	1679.31	1888.39	2152.19	2652.23	1853.3	1791.26	1929.52	2788.87	2017.86	2307.7	1556.92	1737.55
	2.9067_637.3061	241.946	211.418	189.313	236.889	156.258	12450.6	1369.03	749.251	1823.12	1274.42	1153.77	4115.69	1379.82	1039.37	3011.73	915.774	4248.33	2867.42	1282.43	625.722
	9.0287_666.6209	11.4018	21.4932	13.5081	13.898	18.0169	24812	22817	18459.3	21789.9	26057.8	18370.5	20605.5	17768	10205.9	17300.9	8644.01	8246.53	10767.5	4824.36	7879.92
	9.2266_668.6357	61.0339	48.0286	51.9951	47.6269	65.5988	8535.29	8103.54	6455.4	7865.27	9275.32	7475.01	8373.23	7276.31	3968.42	6973.63	6718.91	5566.69	8010.73	3931.75	5884.6
	4.4141_675.5447	15.231	15.4986	19.2988	0	20.1995	2599.74	2798.44	1963.94	2611.47	2622.83	1744.72	2010.02	1343.49	797.97	1659.93	1972.25	1630.09	2014.13	967.237	1377.71
	9.2217_675.6794	915.864	748.631	663.437	762.476	750.258	2278.01	2232.02	1833.76	1834.96	2467.47	2434.57	3179.97	2528.02	2334.91	2232.46	3079.24	2639.16	2696.94	2240.27	2242.5
	4.5877_689.5607	20.6088	18.8181	18.6533	20.8706	22.601	2254.51	2047.53	1550.67	2019.62	2159.22	1579.45	1839.88	1158.39	684.874	1508.04	2269.54	1704.26	2359.27	1052.01	1623.24
	4.7798_703.5767	2280.01	1996.98	1908.41	1988.93	2710.96	96267.7	90956.6	75309.2	93653.6	94588.4	80735.9	81322.3	66427	46978.9	76421	93803.5	79251.8	88451.2	56359.8	69161.1
	8.9016_690.6191	4.288	4.8615	4.5396	4.7832	0	3995.01	3711.06	2887.7	3332.7	4115.23	2704.81	3072.89	2578.47	1584.04	2911.56	1370.72	1787.13	2098	819.927	1455.48
	4.4792_701.5601	44.9138	40.7005	41.7608	40.9106	61.068	4415.67	4169.39	2876.56	3813.1	4133.11	3009.66	3521.87	2306.48	1541.95	3189.94	4339.41	3512.59	4694.82	2278.11	2980.2
	4.9043_705.5918	0	0.1014	0	0	0	412.418	382.72	324.129	559.938	504.986	340.05	0	452.238	182.485	384.153	1057.19	258.856	1131.78	301.957	0
	5.3473_721.5101	161.407	145.216	138.832	146.52	154.584	26521.3	26950.6	22096.2	23924.6	26070.5	24766.5	29944.4	22329.5	22168	24745.7	33677.1	29310.6	29060.9	22789.2	22681.2
	7.2862_721.6262	0	1.8699	0	0	0	1122.93	1167.58	764.515	991.983	0	8289.63	9171.06	6654.85	4597.84	7484.17	11853	7577.88	10746.3	5831.17	8036.79
	7.5798_723.6429	0	0	0	0	1.2614	0	0	0	0	15.0205	0	0	251.944	184.585	401.288	3000.47	2056.31	3056.89	1696.63	2459.42
	4.8323_729.5908	32.8334	23.3595	27.0806	26.7805	38.3315	6853.49	6489.38	4856.44	6269.86	5994.59	5221.78	5740.79	4151.78	2358.11	5387.33	6084.95	5278.05	6256.1	3184.6	4455.58
	5.1796_731.6069	50.1603	54.8373	48.2898	42.8961	62.703	12053.6	11606.8	8626.65	11042.7	11714.8	8421.05	9844.19	6153.05	3476.73	8937.87	11407.7	9094.48	13279.9	5173.68	9047.45
	5.3562_736.5434	26175.9	24407.4	23031	23333.3	24665.6	0	0	0	0	899.1	0	0	0	0	0	0	0	0	0	0
	6.7985_737.6215	0	0	0	0	0	0	0	0	0	0	1174.14	868.276	707.26	644.65	1523.45	4954.86	3554.54	5945.76	2720.85	4814.29
	6.5214_737.6216	0	0	0	0	0	8.3705	0	0.7868	11.8262	2.9451	2052.72	1689.23	1189.89	1161.87	2129.15	9402.95	6462	9421.9	5226.97	7543.21
	4.8166_738.6477	5546.74	4570.63	4204.1	4716.26	5513.65	10110.9	10927.5	8466.5	8091.44	9224.63	10841.2	12765.6	10567.1	11260.9	10935.1	11743.2	10947.4	9952.2	8559.34	7844.66
	6.6_739.6362	0.0317	0	0	0	0	48.2828	60.5287	22.5336	24.9976	40.0035	1954.11	2202.91	1479.98	1102.32	1882.6	7828.38	4727.45	7214.9	3891.16	5341.26
	6.4242_740.6462	0	0	4.1762	0	0	639.828	422.093	335.125	401.097	388.29	1009.58	0	0	539.656	892.087	3266.14	1881.29	2695.45	1530.71	0
	7.1368_740.6499	0	0	0	0	0	2450.13	2665.79	1790.69	2151.54	2420.39	1616.24	0	0	610.578	0	0	556.169	0	0	0
	5.3472_750.5597	215.775	198.172	181.89	172.558	201.062	8056.81	8144.88	6304.89	7057.54	7656.68	8022.74	9466.97	6823.21	7245.64	7635.82	12018.4	9870.96	9601.65	7493.39	7273.53
	4.9999_752.6096	868.946	786.332	750.729	763.786	846.655	2782.24	2901.19	2121.91	2275.57	2658.07	2590.44	3343.59	2274.39	2375.82	2616.27	4819.69	3877.59	4573.2	2645.03	3197.29
	5.0099_753.6145	25184.6	22311.9	21022.7	22558.1	25293.9	65734.5	70876.6	54025.1	56214.7	63383.3	60840.9	78357.7	58053.2	58344.8	65086.4	76403.5	66192.6	74082.4	48961.5	55474.3
	5.2315_757.6222	0	3.6962	3.3535	0	1.8457	2474.73	2338.79	1689.29	2418.02	2431.57	1706.3	1969.66	1158.72	659.063	1713.99	1863.2	1501.52	2168.39	821.076	1390.06
	4.9196_758.5717	38.8467	36.2324	32.4095	32.3973	38.7713	253726	241450	187149	233491	238363	155156	168810	111810	56766.6	135748	102604	79388.3	116250	42214.3	81929.3
	5.6346_759.6382	24.9232	16.6933	21.6965	16.0837	24.335	5624.34	5490.88	3731.27	5242.21	5702.35	3714.15	4332.73	2838.86	1596.33	3899.7	4723.09	3554.73	5182.13	2245.21	3673.01
	5.2142_760.5873	455.163	451.229	420.856	382.866	551.608	113909	111701	87709.8	113278	110973	80669.1	91131.4	64074.6	33952	85663.7	86144.1	70777.6	105062	41644.5	74723.8
	5.3479_764.5763	192.423	172.33	158.687	143.209	158.139	23424.7	23544.7	18672.6	20775.3	22138.6	23932.8	27471.9	20649.7	22090.1	22978.6	35669.9	29798.5	29343.9	23556.4	23097.9
	7.3035_764.6901	0	0	0	0	0	185.26	222.872	128.401	181.106	206.473	2032.49	2277.75	1524.48	1002.34	1789.89	3152.16	1837.59	2879.83	1423.46	2032.3
	4.9993_766.5757	2.1105	0	0	3.4199	0	2418.63	2443.7	1778.78	2386.95	2356.82	1451.91	1661.38	1068.18	656.086	1411.07	1007.86	960.834	1227.52	456.042	722.934
	6.4618_766.6565	0	0	0	0	0.0649	1596.36	1460.01	1025.4	1275.89	1248.18	2294.01	2142.62	1352.77	1369.55	1704.54	9234.7	4700.97	7381.84	3687.48	5590.98
	5.0877_768.5926	0	0	0	0	1.1074	3224.4	3089.13	2169.91	2975.59	3019.66	1783.76	1946.12	0	755.082	1747.1	1190.6	1083.96	1352.13	538.838	802.436
	8.7196_768.7084	46.1968	34.6222	34.5051	39.1087	37.5295	3779.16	3516.16	2779.96	3151.2	3877.07	2603.39	2956.83	1885.02	1178.15	2439.35	3127.09	1818.88	3100.6	1123.44	1903.56
	4.836_782.5717	0	0	0	0	0	74399.3	69883.6	52779.3	71078.9	64858.1	34883.6	38675.7	25714.6	11824.6	35270.6	19289.3	17387.3	22922.6	7992.48	16335.7
	4.9915_784.5873	0	0	0	0	0	47604.5	43644.1	29414	42067.6	43496.3	23042.9	24892.9	15897.4	8553.31	21037	16632.8	14085.9	19307.4	5564.46	11049.7
	5.679_785.6529	32.2511	31.6487	0	27.2417	32.2474	6691.45	6476.6	4333.2	6185.85	6402.81	4963.52	5712.33	3686.61	2125.35	5028.53	6445.95	4849.97	7033.25	2894.26	4741.69
	5.3061_786.6033	0	0	0	0	0	125238	125234	98661.7	128343	125244	75631.4	83168.2	53522.7	26892.7	71574	57176.6	44714.1	65417.7	24954.1	47144.2
	6.1237_787.6695	0	0	89.9159	83.6142	103.954	10420	10405.2	7243.65	9863.62	10337.4	8126.25	10045	6253.94	3460.59	8284.17	10878.8	8342.91	12101	4932.02	8314.15
	5.6572_788.6181	297.661	267.407	245.498	242.239	341.309	12933.8	13085.9	8440.54	12471.1	12875.3	11444.7	13418.6	10396.2	5550.72	14921.6	17190.4	14578.6	22097.3	8594.91	15484.3
	8.385_792.7083	0	0	0	0	2.7474	5348.92	4591.61	3604.78	3998.47	4787.27	2782.71	3336.38	1909.4	1297.22	2631.78	1848.54	1116.86	1918.29	632.059	999.837
	8.7444_794.7244	0	0	11.1232	20.0778	0	11119.3	10565.3	8543.62	9644.79	11431	7796.87	8913.28	5765.97	3289.68	7238.95	8744.18	5193.27	9362.6	3198.04	5668.85
	8.9866_796.7408	191.566	174.876	176.292	142.854	131.501	6857.78	6487.42	5267.39	5798.98	7060.76	5497.72	5904.47	4239.89	2712.8	4916.2	7283.69	5075.64	7034.83	3735.56	5101.16
	6.3676_801.6846	0	18.1993	0	12.5922	12.2337	3308.86	3266.03	2309.43	3260.86	3470.04	2697.59	2810.02	1764.9	1034.22	2541.72	3156.91	2399.69	3186.02	1492.29	2291.43
	4.4116_806.5549	2.0488	2.1562	0	0	0	4712.19	4599.77	3147.14	3956.35	4774.9	902.456	1276.19	1029.33	738.794	890.905	807.842	505.242	504.256	264.567	513.954
	4.7546_806.5715	0	0	0	0	0	17833.8	17021	13066.4	17597.9	17704.2	10034.6	10459.9	7897.21	4495.83	10669	7306.11	7093.03	8338.54	3744.14	5769.05
	6.4498_807.6852	0	0	0	0	0	1148.62	1069.25	719.95	899.423	862.366	1286.17	1316.86	846.464	859.645	1037.07	3661.73	2184.35	2985.07	1613.51	2179.87
	4.8704_808.586	59.9092	56.7026	39.9745	46.4377	56.954	10130.4	10635.3	6798.51	10398.6	10095.8	6967.9	7934.13	5538.92	3000.72	7968.99	6707.71	6597.54	9090.78	3151.55	5936.33
	5.2319_810.6027	0	0	0	0	0	31786.3	31575.5	23536.1	32677.7	31705.6	18024.8	19998.5	13292.1	6863.67	19785.5	13898.4	12096.1	17871.3	5854.05	11759.7
	5.0134_811.6577	0	0	2.5417	4.6986	4.2192	1745.64	1959.12	1433.54	1491.66	1859.19	1617.21	2074.38	0	1405.1	1652.46	1654.4	1585.84	1411.09	948.394	0
	5.6676_811.6689	0	0	0	22.7867	0	8347.28	8202.51	5211.05	7719.22	8040.13	6147.33	6890.81	4520.96	2607.94	6036.15	7475.37	5687.51	8156.46	3419.77	5599.21
	5.4033_812.6179	0	0	0	0	0	5645.6	5204.89	3893.45	5373.64	5326.59	3774.79	4360.14	3037.34	1591.82	4335.76	4518.21	3804.05	5643.82	2064.98	3718.02
	6.0981_813.6857	0	115.963	90.8858	72.5255	85.9303	17446.9	17772	12208.6	16511.1	16852.8	14024.6	16789.2	10981	5987.46	14386.3	18392.3	14111.4	20680	8271.4	13918.5
	5.1207_834.6009	0	54.9291	0	57.6548	80.5576	2768.86	2835.78	1953.35	2724.11	2796.95	2333.51	2668.99	1971.72	1133.33	3208.46	3206.58	3121.7	4379.48	1609.01	2790.46
	4.7452_834.5854	0	0	0	0	0	3952.89	4008.14	2586.32	3445.74	4128.34	767.884	1044.85	850.756	668.289	656.123	597.983	391.491	181.356	0	273.765
	6.6395_815.7001	0	84.8298	66.1338	78.366	88.4994	4940.72	5073.2	3520.62	4751.69	5209.35	4214.77	4818.9	3129.06	2064.67	4287.31	5776.61	4318.25	5645.01	2620.63	4004.6
	4.9095_816.6226	2.5652	0	3.0871	0	0	3223.1	3203.46	2485.52	2953.53	3295.75	2704.67	2953.99	2120.2	1366.42	2438.71	1915.12	1619.33	1880.84	819.376	1266.14
	5.2053_818.6394	0	0	0	0	0	2598.18	2628.09	2032.89	2483.56	2792.52	2081.11	2312	1645.17	899.109	2114.23	1984.69	1756.24	2141.07	901.599	1392.8
	8.4019_818.7242	0	0	0.6401	0	0	7757.67	6578.12	4964.23	5772.32	6765.07	3800.96	4234.12	2343.71	1561.52	3523.87	1753.16	1141.23	2122.89	554.257	975.216
	8.7786_820.7411	0	0	0	0	0	32415.8	30937.6	25239.4	28152.2	33120.5	22709.2	24970.9	17318.5	9887.99	20799.7	18266.6	12482.1	21135.2	7011.85	12583.2
	8.9918_822.7575	0	0	0	0	0	32737.6	31048	26365	28329.4	33216.9	26371.5	28520.3	21030.4	13119.5	23832.9	32270.6	23193.1	32431.9	17219.8	24011.6
	9.1554_824.7727	367.763	352.457	341.971	337.039	307.048	9873.81	9208.88	7754.71	8471.09	10143.6	8067.65	8566.96	6858.59	4565.8	6981.5	10523.1	7872.91	10052.6	6258.69	7910.27
	8.9871_829.7988	9102.78	7836.49	7002.08	7991.55	8426.83	13786.8	13519.1	11434.8	10776.8	14289.2	14868.2	18501.2	14099.6	15819.4	15661.6	18772.4	17091.8	16044.3	14838.2	14630.3
	8.9064_834.7557	0	0	0	0	0	4918.45	4328.31	3635.95	4014.65	5161.65	3740.45	4297.23	3005.74	2004.1	3297.93	3774.21	2717.65	3799.57	1772.38	2354.76
	5.2343_836.6176	0	0	47.188	0	0	1232.02	732.834	543.868	745.471	776.311	1302.66	1551.65	1415.39	764.935	2382.8	2559.18	2395.36	3608.6	1282.73	2323.82
	9.0952_836.7712	82.3867	41.6653	35.83	35.8595	43.6319	6364.74	5833.21	4767.38	5187.51	6628.79	5016.21	5708.92	4151.58	2672.29	4491.49	7021.39	4783.23	6588.84	3558.56	4877.95
	5.2937_844.6555	0	0	0.0557	0.1201	0	2822.23	2820.88	2159.94	2774.4	2936.5	1720.64	1923.52	1125.62	427.819	1554.94	914.486	768.755	1150.08	321.736	756.223
	8.4986_844.7388	0	0	0	0	0	8076.22	7580.6	5529.69	6676.92	7376.53	3958.36	3936.74	2289.48	1155.03	3123.87	1474.32	1170.77	1969.97	497.322	953.089
	8.7975_846.7573	0	0	0	0	0	66786.6	62962.4	53404.9	58082.4	67447.7	47023.5	50655.5	36544.4	22899.5	42743.6	28876.1	22411.2	35232.5	12001.7	20183.4
	8.9993_848.7734	0	0	0	0	0	107735	101953	88968.9	95224.5	108412	84026.4	90492.5	68352.9	43357.6	75581.2	80117.8	61079.1	83704.1	44239.5	61791.2
	9.1627_850.7892	248.394	249.958	213.416	205.919	259.071	67673.3	63381.5	56518	59913.3	67559.5	55734.2	59950.2	48801.2	33221.9	48312.4	67010.7	51572.2	68338.5	42237.2	53494.5
	9.3075_852.8036	186.817	224.996	113.11	131.13	121.171	11746.1	12018.7	10352.6	11293.9	12627	10086.8	11110.7	9080.36	5566.13	9039.74	11337.5	8779.86	11214.6	7476.13	9440.87
	8.685_858.7545	0	0	0	0	0	2989.19	2739.89	2181.11	2442.7	2919.89	1703.16	1922.43	1142.27	701.007	1568.11	600.996	440.144	839.687	194.802	327.826
	8.9223_860.7705	0	3.1132	0	0	5.1654	9103.42	8384.52	7118.62	7637.58	9187.28	6340.79	6855.88	4873.08	2946.34	5446.62	4013.14	2969.41	4651.04	1725.28	2670.87
	8.7624_862.7805	0	0	0	0	0	2382.83	2256.55	1769.55	1814.41	2348.95	1793.8	1801.49	1375.75	835.5	1597.89	1648.69	1182.7	1627.2	855.961	1160
	9.1058_862.7873	57.4845	0	41.9272	32.9956	52.1508	15723	14433.2	11921.9	12879.3	15988.4	11682.9	13169.1	9624.33	6020.69	10049.2	11741.3	8579.12	12508	5944.78	8715.8
	9.2298_864.8021	0	31.4939	0	25.1227	31.5482	4622.63	4428.29	3667.65	3967.83	4755.41	3232.33	3880.98	2824.06	1609.82	2879.88	4434.65	2933.47	4440.03	2261.79	3192.64
	8.5962_870.7553	0	0	0	0	0	38635	35624.6	27282	32435	37060.2	17033.9	18153	10886	5846.84	15010.5	5083.87	4593.79	7859.19	1672.71	3096.66
	8.8377_872.7731	0	0	0	0	0	178748	168443	147896	156281	177966	124667	132660	100218	66545.2	111838	64599.4	57568.2	82342.3	29922.3	48059.5
	9.0158_874.7883	0	0	0	0	0	263578	246716	220467	235286	264520	197766	211015	161099	104812	177032	135529	111679	153742	74972.6	107773
	9.1683_876.804	252.815	277.841	202.32	198.172	233.494	183176	171169	155213	160618	181022	147872	159494	131262	93445.7	129447	158755	126392	165302	104696	130309
	9.3075_878.8196	51.3756	43.1473	48.6297	41.3813	46.7329	42840	43863.1	39768.9	40640.6	45613.3	37734.9	41348.5	33907.2	21238	32757.1	40880	31708.4	41314.6	26287.6	33126.9
	9.4178_880.8342	85.2943	115.607	107.193	111.126	71.6916	10769.3	791.689	821.706	822.574	1067.4	0	692.505	91.5658	0	700.637	7974.04	5787.04	8891.59	277.82	1286.15
	8.9477_886.7865	5.431	0	0	0.316	0	4579.01	4216.94	3539.54	3788.67	4627.14	2971.89	3194.32	2184.24	1317.91	2546.31	1420.37	1164.25	1755.76	559.071	877.616
	8.7896_887.785	0	0	0	0	0	2822.28	2563.26	2065.13	2274.63	2833.7	1771.62	1666.21	1237.9	760.709	1443.58	1180.93	1101.54	1587.22	654.592	803.109
	8.7879_888.7938	0	0	0	0	0	7291.83	6306.24	4873.58	5709.92	6781.03	4821.71	4934.21	3586.69	2183.33	4042.39	3616.99	2863.29	3783.8	1609.47	2165.87
	9.1027_888.8026	3.9342	8.7629	4.9116	0	1.4572	11238.5	10502.9	8603.67	9182.31	11354.8	7604.33	8433.4	6045.41	3695.6	6440.13	5268.47	4153.72	5831.42	2536.64	3595.17
	9.0009_889.8002	0	0	0	0	0	15196.7	2477.94	2137.96	2337.21	2595.87	2646.69	2812.41	2539.75	1520.72	2320.55	10889.7	8039.05	11299.9	5383.02	7609.91
	9.2429_890.8175	0	12.3854	0	7.3253	19.5305	5714.53	5244.26	4581.49	4764.2	5657.8	3918.89	4651.12	3425.62	1930.6	3385.42	4709.28	3247.21	4653.08	2428.22	3368.56
	9.1749_891.8157	0	0	0	0	0	10960.2	10245	8668.45	9188.17	11303.5	8645.78	9695.48	7511.53	4545.11	7283.62	10300	7501.84	9897.44	5701.32	7453.28
	8.4906_892.7968	0	0	0	0	0	0	0	3.4463	0	0	167.283	211.842	110.669	75.7328	128.94	2766.49	1396.88	2511.9	980.226	1832.3
	9.3703_892.8351	0	0	0	20.5763	0	1702.52	1546.88	990.277	1575.28	1855.81	1024.29	1585.96	905.768	575.617	1067.31	1197.21	906.566	1114.04	620.732	812.919
	9.3366_893.836	0	0	0	0	0	1800.78	1768.37	0	0	2104.9	0	1862	0	0	0	0	0	0	896.926	0
	8.2021_894.7541	0	0	0	0	0	2476.94	2658.53	1848.54	2281.3	2666.52	1411.15	1164.81	862.94	381.499	1027.53	601.552	500.526	868.271	184.915	308.275
	8.5815_896.7714	0	0	0	0	0.0496	30890.4	29173.5	22929.1	26268.7	30518.6	13637.6	13628	7961.17	3750.03	11478.1	3243.31	2952.31	5665.48	1150.82	2116.62
	8.8513_898.7887	0	0	0	0	0	99619.8	94014.9	82400.3	87249.2	100296	68095.7	70861.4	52862.3	32016.9	59135.8	31887.9	30555.2	43965.6	15272.8	23924.5
	9.0321_900.8047	45.2945	50.2138	33.0425	27.8779	30.0984	93269.3	87312.8	77612	82273.1	92369.9	67318.9	71184.5	53339.8	32925.2	59100.1	41492.1	35847	50685.4	22233.6	32415.4
	9.1839_902.8201	290.827	234.093	182.21	178.264	221.544	68917.2	64478.7	57764.8	58891.7	66773.5	52717.3	55957.7	45344.8	31496.4	44600	46538.3	38159.6	50847	30205.9	36948.5
	7.0968_904.7608	0	0	0	2.3081	0	2749.38	2507.09	1759.06	2191.92	2451.64	3313.03	2926.79	1907.46	1281.09	2722.33	8735.08	4771.94	8706.17	3949.08	5800.58
	9.3075_904.8355	81.6302	142.109	31.1488	60.8078	58.6894	42720	42244.7	38942.9	39733.6	45347.1	36644.4	39592.9	33390.4	20668.1	31069.8	35590	28182	37440.5	22389.1	28332.1
	7.4991_906.7772	0	0	0	0	0	2370.04	2296.23	1598.21	2062.45	2255.88	3921.9	3725.49	2382.88	1378.31	3153.58	6100.89	2345.97	5852.77	1172.07	2151.92
	9.4235_906.8498	23.3968	19.6757	51.0161	30.7393	28.9638	3986.7	4938.26	4464.89	5257.49	6163.58	3164.62	4892.27	2879.46	507.115	3294.42	3241.35	2121.3	3799.53	1964.57	2925.43
	9.5184_908.865	87.7995	65.6975	91.7305	84.4055	82.2948	5015.16	4711.3	3846.72	4353.69	5192.16	3469.59	4096.58	2945.69	1455.63	3112.9	4000.33	2822.14	3979.93	57.2591	2727.55
	8.5925_911.7846	0	0	0	0	0	3887.48	3593.02	2767.84	3323.11	3845.12	2248.35	2368.13	1549.61	919.531	2015.17	632.946	731.338	998.638	274.135	462.757
	8.8361_913.8009	0	0	0	0	0	18443.2	17309	14307.3	15609.6	18239.9	10659.5	11375.1	7970.32	4791	9186.87	5059.61	4466.85	6534.41	2434.6	3482.55
	9.0152_915.8159	0	0	0	0	0	20523.2	19116.5	17263.2	17688.1	20867.2	17187.3	18681.3	14774.8	10214.4	15258.8	14407.2	11572.5	15220.8	7473.86	10487.2
	9.1727_917.8323	0	0.6975	0	0	0	19591.1	18330.5	16354.2	17150.2	20515.6	16526.5	17652.5	14693	9296.7	14050.5	17772.5	13507.9	17216.9	10684	13741.5
	9.3088_919.8481	0	0	0	0	0	2147.97	2479.52	2012.09	2189.93	2709.05	1684.68	2190.83	1659.55	714.273	1548.14	1893.44	1179.86	2255.32	0	1630.75
	8.6109_920.7684	0	0	0	0	0	1888.44	1742.29	1372.59	1570.32	2047.62	700.267	832.284	486.13	254.342	746.049	200.657	0	363.167	0	143.947
	8.3701_922.7703	0	0	0	0	0	8522.61	8113.88	4902.79	5850.41	6833.27	4083.26	5688.93	2928.41	2767.76	3215.26	2310.75	1177.43	1371.91	540.612	1026.21
	8.7543_922.787	0	0	0	0	0	4894.34	4920.65	3804.09	4303.02	4845.68	2081.79	2213.5	1305.11	509.606	1901.23	193.351	261.892	710.263	78.4907	212.788
	8.6908_924.787	0	0	2.4486	8.3034	9.3698	11571.4	11565.1	7544.8	8492.62	9601.27	6870.21	8653.78	5029.31	4620.9	5534.52	5945.09	2668.92	3405.93	1552.76	2781.84
	8.948_924.8022	13.5241	7.3637	8.8909	0	11.8144	13628.2	12793.3	10880.5	11497.3	14135	7047.89	7569.98	5310.37	2920.99	6386.84	2546.11	2857.51	3883.65	1274.6	1966.46
	9.0996_926.8175	2.5872	0	0	0	0	7002.17	6657.05	5443.64	5643.94	7102.27	3931.68	4397.22	3175.69	0	3325.4	0	1651.99	2094.28	790.314	0
	9.2038_928.8335	1.4445	2.1287	0	0	0	4650.57	4209.82	3003	3640.02	4442.19	2414.09	2779.83	1907.26	1125.69	1888.51	1102.3	1205.03	1671.92	345.856	424.027
	9.3237_930.8486	0	11.9028	0	0	6.2062	5133.1	5127.07	4719.94	4359.11	5524.17	4108.67	4883.55	3833.95	2338.82	3542.75	3143.64	2716.72	3211.66	2126.17	2267.36
	8.0044_931.8103	0	0	0	0	0	0	0.0394	0	75.5043	0	0	0	0	0	0	4172.96	2715.81	3729.67	1957.95	2979.15
	9.4209_932.8645	0	20.7	0	16.0872	5.1939	4323.21	4962.54	3396.03	3745.86	5345.55	2797.25	3624.47	2586.66	1339.74	2590.47	2699.56	2119.09	2909.87	1575.71	1917.1
	8.4955_933.8259	0	0	0	0	0	0	0	0	0	0	211.355	180.639	133.223	95.7098	131.061	2956.85	1798.03	2654.9	1136.13	1714.51
	9.5122_934.8802	0	0	17.2577	2.8696	8.2687	4387.29	3741.08	2944.87	3378.97	4069.52	2752.22	3338.81	2370.04	1184.87	2224.43	3033.02	2195.12	3069.12	1446.93	1923.47
	8.5817_937.7998	0.1717	0	0	0	0	3145.32	3020.11	2277.25	2743.98	3188.62	1927.63	2054.21	1309.72	769.263	1730.96	658.677	740.428	1066.17	308.431	506.513
	8.8431_939.8158	0	0	0	0	0	9237.55	8499.5	7128.34	7821.77	9416.96	5275.57	5764.58	3951.5	2272.24	4479.17	2445.62	2305.79	3410.49	1247.48	1727.03
	9.0316_941.8306	0	0	0	0	0	6863.67	6350.39	5726.88	5801.72	6927.38	5461.66	5958.8	4442.27	2957.87	4754.98	4154.12	3440	4671.12	2103.45	2963.42
	9.1885_943.8469	0	0	0	0	0.4357	6472.48	5954.45	5317.34	5245.78	6666	5222.64	5647	4610.71	3117.8	4379.67	4949.04	3912.94	4836.4	3005.61	3437.42
	7.0937_945.7897	0	0	0	0	0.2482	988.596	1024.22	663.589	873.404	880.11	1382.65	1246.52	799.156	644.725	1320.86	5287.6	3174.92	4899.01	2609.49	3497.04
	9.3091_945.8632	0	0	0	0	0	2458.91	2606.74	2110.84	2316.66	2851.86	1947.73	2117.93	1692.85	905.227	1628.73	2044.54	1253.41	2431.21	1013.03	1652.27
	8.7023_950.8011	0	0	0	3.435	0	3848.67	3862.51	2528.06	2885.24	3587.9	2346.72	3475.92	2014.39	1598.83	1922	1844.75	902.974	1117.04	526.834	964.319
	8.8249_956.8662	0	0	0	0	0	2960.21	2812.91	2318.03	2608.1	3152.42	2213.16	2257.12	1784.56	0	2002.85	0	936.164	1252.55	477.151	690.883
	9.4358_958.88	0	0	1.599	0	0	2269.4	2044.64	1753.36	1979.64	2310.36	1352.59	1755.85	1307.46	706.627	1332.15	959.776	928.274	1135.76	600.596	659.365
	9.5237_960.8961	36.3625	7.2204	27.5808	17.6532	15.5733	3980.34	3808.41	3177.82	3402.5	4297.06	2994.76	3403.82	2492.16	1581.82	2483.53	2752.4	2226.17	2630.82	1640.57	1805.21
	9.1758_960.8967	0	0	0	0.1957	0	2460.89	2204.18	1919.28	2108.17	2599.33	2118.01	2326.71	2070.06	1630.27	1874.55	2404.98	2101.76	2144.2	1686.75	1572.73
	1.1598_339.1995	1840.29	3699.31	2933.27	4324.48	5264.73	4476.45	2587.52	2953	1479.43	3415.57	1220.62	1780.92	1461.01	2447.68	0	686.555	650.49	728.465	741.925	684.141
	3.3586_255.2324	647.323	903.606	927.712	1047.48	1343.2	4290.27	1103.3	1413.75	1010.72	1444.11	857.853	1282.03	1372.97	1251.79	0	915.825	1058.77	1319.97	822.342	964.241
	3.4433_281.2476	0	0	0	0	0	1214.79	184.667	224.191	132.9	262.236	239.235	560.935	480.23	239.91	0.2492	327.045	438.027	572.181	298.879	420.884
	3.9722_283.2634	758.38	1165.55	1063.86	1167.24	1836.96	4097.62	1641.31	1987.51	1421.79	1967.88	1187.07	1674.26	1683.17	1560.19	9.2667	1183.49	1324.6	1682.82	1041.24	1374.69
	4.2074_297.2793	1697.78	1723	1561.18	1578.13	1767.36	3536.77	3946.78	3622.09	3479.65	3798.76	3041.48	3758.09	4051.82	3585.92	0	3818.25	3522.15	4027.47	3455.26	3623.19
	2.8164_303.2319	0	0	0	0	0	52.3089	72.7042	62.6644	65.9189	91.0671	362.09	590.289	604.967	282.496	0	523.573	1067.85	1286.44	506.168	849.839
	2.6441_327.2324	0	0	0	0	0	0	42.3883	48.2707	33.4509	43.3043	284.122	416.342	508.904	239.563	0	435.65	670.164	920.657	381.75	700.572
	1.1534_337.2049	0	0	0	0	0	407.846	158.056	199.972	129.419	238.027	193.613	82.3471	103.555	156.508	0	77.0337	84.684	172.105	159.06	177.298
	3.2579_465.3031	0	0	0	0	0	925.645	932.408	753.275	880.394	876.382	560.17	614.833	595.415	344.274	0	654.999	573.729	809.347	443.368	617.259
	4.177_505.3291	0	0	0	0	0	701.491	718.059	798.014	337.533	723.607	241.858	201.71	302.975	272.146	5.5915	72.7523	81.9624	40.7208	64.7505	41.1396
	1.7742_513.3682	658.927	574.452	611.662	626.218	718.987	0	0	0	0	0	0	0	0	0.2492	0	0	0	0	0	0
	4.7981_531.3483	0	0	0	4.3576	0	874.394	888.631	837.447	881.671	734.308	568.775	591.673	579.645	326.762	0.394	519.582	552.509	667.881	479.475	636.654
	1.4365_540.3298	0	0	0	0	0	5093.26	5067.92	4672.02	5266.16	5496.97	2549.55	2994.38	3216.44	1942.71	0.38	2870.54	3437.81	4047.21	2234.54	3378.79
	4.7983_544.3492	0	0	0	0	0	1180.48	1262.05	1195.21	1217.66	1079.54	927.763	942.544	983.261	716.096	0	800.908	896.611	958.064	842.221	858.927
	4.7989_545.3458	0	0	0.9656	0	0	2761.42	3045.59	2898.88	2864.21	2556.17	2197.18	2279.23	2373.47	1696.84	0	1941.68	2086.91	2265.64	2008.85	2001.98
	5.427_555.44	0	0	0	0	0	141.683	82.3224	91.6336	103.439	80.8996	208.235	241.396	225.833	180.104	0	947.82	780.66	914.607	704.192	879.446
	1.1251_564.3297	0	0	0	0	0	236.223	47.7157	0	552.193	15.6735	598.659	679.468	652.866	373.524	0	523.343	711.668	503.537	360.45	596.447
	1.6677_566.345	0	0	0	0	0	353.728	360.93	328.552	436.654	447.393	967.568	1213.72	1428.08	871.562	0	1134.04	1366.32	1690.91	904.755	1335.02
	2.4771_568.3606	0	0	0	0	0	3860.41	3861.73	3476.63	3843.12	4142.14	2283.3	2708.18	2742.55	1639.57	0	3001.79	3304.99	4143.27	2226.71	3287.82
	1.7025_573.3891	1107.25	994.513	1006.44	1012.74	1189.38	1784.93	1909	1603.58	1610.14	1790.5	1665.13	1921.81	1908.29	1865.32	0	1978.59	1836.65	1955.5	1720.84	1757.74
	5.499_596.5246	520.452	0	0	0	594.454	1410.95	1470.5	1259.32	1347.09	1344.41	1156.49	1426.31	1477.16	1268.57	0	1315.9	1306.01	1375.67	1166.84	1167.73
	4.5717_597.4501	0	0	0	0	0	0	0	8.377	0	2.4766	62.0625	57.9201	92.0781	51.6894	0.055	761.5	563.432	831.515	516.808	735.003
	4.5488_609.4511	0	0	3.5214	0	0	28.0593	0	21.1124	9.612	3.7926	38.8467	33.7478	47.6615	10.2444	0	725.027	596.94	950.893	432.166	845.947
	4.5145_650.4023	693.077	857.596	519.745	687.738	689.462	0	0	0	0	0	0	4.0726	25.5707	0	0	0	0	0	0	0
	1.5533_666.0587	0	0	0	0	0.3175	251.44	50.8899	61.8342	112.014	50.3749	602.2	141.899	370.09	1121.66	0.3411	1347.71	274.627	985.237	5516.51	394.018
	6.7749_666.6027	0	0	0	0	0	900.828	840.701	698.581	890.53	891.081	531.619	565.264	542.556	277.109	0.1744	564.067	520.396	730.409	305.829	584.432
	4.329_667.4773	0	0	0	0	0	0	0	0.0247	0	1.9138	0	80.5355	96.4095	29.4841	0	752.37	0	625.404	460.931	641.146
	7.0468_680.619	0	0	0	0	0	854.519	874.051	793.827	851.208	958.58	460.301	562.391	482.694	267.934	0	570.96	394.76	699.845	358.063	549.848
	2.9062_681.2958	0	0	0	0	0	2630.95	351.397	250.404	544.757	367.878	302.207	974.144	443.473	303.633	0	252.81	1155.95	823.415	462.236	199.514
	5.7054_681.5132	0	0	0	0	0	498.876	483.391	531.33	502.576	454.184	1125.26	1242.03	1312.56	601.912	0	809.75	683.592	652.213	450.986	580.46
	6.1096_683.5273	0	0	0	0	0	407.205	378.586	346.67	447.664	373.496	1553.26	1714.44	1830.49	902.11	0	2036.08	1379.48	1360.2	1075.67	1508.94
	6.7433_692.6191	0	0	0	0	0	1090.15	1098.31	907.283	1273.59	1176.57	661.217	696.487	702.286	352.505	0	705.076	676.41	896.624	89.5222	637.169
	4.3662_693.4933	0.2713	0	0	0	0	0	15.0036	27.233	17.5593	16.3949	250.43	325.683	284.298	108.736	0	834.527	516.816	600.364	458.74	654.759
	7.323_694.635	0	4.3399	0	0	0	2743.46	2520.11	2275.11	2741.78	2753.67	1456.76	1713.94	1526.49	791.791	0	1825.46	1435.16	2045.6	1080.2	1670.7
	4.5901_695.507	0	0	0	0	0	45.1954	0	44.3449	0	51.4356	390.11	448.739	620.636	170.764	0	719.434	300.537	481.741	269.403	464.071
	5.7466_707.5315	0	0	0	0	0	317.923	363.288	311.837	328.897	367.952	1075.29	1113.06	1195.64	593.593	0.7473	850.242	594.43	696.779	419.192	685.195
	6.146_709.5436	0	0.8474	0	0	0	0	0	163.15	0	0	1026.95	1147.63	1290.94	518.989	0	1076.18	810.368	846.941	500.204	817.143
	5.124_709.5506	553.465	518.363	545.813	506.497	584.812	0	0	0	0	0	0	0	528.667	551.487	0	505.182	526.172	0	485.689	0
	7.3233_711.6256	0	0	0	0	0	699.189	667.885	656.808	748.396	682.688	374.798	334.899	384.674	243.725	0.6058	241.162	296.707	376.713	231.375	340.984
	4.4192_719.5331	0	0	0	0	0	2128.41	2244.35	1996.31	2246.77	2214.86	1535.18	1706.74	1554.69	912.135	0	1648	1623.16	2040.01	1216.01	1614.06
	5.1303_722.5135	0	0	0	0	0	340.267	540.848	477.516	551.905	505.711	245.275	321.991	327.633	258.495	0	201.493	176.252	214.827	173.495	183.546
	4.5885_733.5493	0	0	0	0	0	1235.5	1365.28	1167.39	1316.92	1329.49	906.92	1022.78	1007.74	615.129	0	1161.52	1195.38	1477.16	945.56	1135.24
	5.0393_737.5806	627.837	620.714	570.593	576.324	613.703	0	0	20.3529	0	0	5.4732	13.9673	0	0	0	16.9023	0	0	10.1925	0
	6.104_737.5964	0	0	0	0	0	204.221	0	121.474	0	145.209	208.85	166.169	250.625	173.487	13.5795	1198.07	504.171	926.796	553.499	805.089
	4.6324_740.5444	3917.42	3624.51	3740.11	3837.64	4333.1	2966.93	3484.99	3111.25	2921.09	3254.43	3074.94	3520.12	3823.02	3730.71	0	3632.62	3701.63	3861.89	3380.51	3255.63
	5.7211_741.5684	0	0	0	0	0	0	0	0	0	0	54.6281	0	0	0	0	1097.09	892.152	1375.15	762.171	1243.09
	5.4178_742.539	36.1721	0	0	0	0	472.998	466.351	381.766	568.454	534.031	204.65	288.791	245.673	186.022	0	101.048	163.222	170.921	77.8295	153.619
	4.4727_745.5487	0	0	0	0	0	2638.34	2755.96	2379.86	2621.07	2574.88	2008.92	2201.93	2162.21	1267.91	0	2460.97	2549.33	3074.02	1964.31	2524.37
	4.776_747.5648	554.564	580.988	598.157	598.678	733.577	11970.2	12000.6	10626.5	11943.7	12273.5	8405.15	9321.65	9174.81	5812.59	0	10726.3	10390.6	12775.8	8183.34	10914.6
	4.907_749.5774	0	0	0	0	0	242.173	105.623	175.62	230.621	183.37	147.45	118.09	225.381	0	0.3066	385.108	0	377.608	0	0
	5.5564_750.544	0	0	0	0	0	973.558	1166.19	1003.43	1204.48	1184.16	711.049	716.29	655.555	314.488	0	380.208	437.791	467.536	302.31	277.502
	6.1211_763.6079	0	0	0	0	0	0	0	0	0	0	473.567	687.752	648.291	0	0	4447.07	2525.88	3662.79	2336.19	3381.13
	4.8362_773.5793	16.6448	0	0	0	0	552.383	498.414	547.415	649.657	630.647	576.35	630.779	589.929	287.871	0	699.094	736.192	869.624	524.807	709.711
	5.1677_775.5953	0	0	0	0	0	2913.03	3036.39	2775.34	2980.94	3005.6	2327.6	2535.3	2503.69	1747.93	0.2364	2853.37	2783.79	3242.84	2294.59	2775.7
	4.8378_782.6364	2081.24	2025.7	2031.8	2006.72	2314.97	1032.49	1173.91	1077.59	996.033	1085.33	1011.85	1240.61	1264.07	1305.24	0	1209.42	1138.31	1133.55	1116.15	1014.37
	5.0793_786.5634	0	0	3.9045	0	0.1604	451.962	572.09	493.141	552.589	568.118	366.593	403.858	306.514	239.378	0	243.605	264.451	305.414	162.497	227.396
	6.1631_789.6251	0	0	0	0	0	0	0	27.3936	0	0	97.2206	178.14	73.862	0	0	1170.55	729.377	1107.66	701.191	720.13
	5.0434_796.5966	662.47	674.551	660.931	653.112	661.339	0	0	0	0	0	0	0	0	0	0	0	0	0	0	0
	5.0327_797.6028	11754.8	12019.2	11559.3	11671.9	12693	6820.88	7553.28	6977.86	6277.5	7008.86	6996.81	8055.81	8341.08	8703.81	0	8055.96	8547.9	8565.92	8018.43	7554.83
	4.6657_800.5424	0	0	0	0	0	616.044	563.964	531.985	687.754	602.101	241.951	244.25	289.961	125.103	0	114.357	123.168	135.299	30.2135	147.11
	4.9191_802.5601	0	0	0	65.1764	0	20825.6	21881.8	19814.6	21850.7	21738.3	13854.1	14659.6	14605.1	9322.88	0	11128.6	10707.7	13207.1	7878.68	10871.4
	5.6288_803.6276	0	0	0	0	0	2147.91	2140.66	1920.81	2144.6	2143.21	1465.34	1537.62	1423.43	1028.86	0	1629.98	1601.34	1853.55	1262.25	1566.52
	5.2162_804.5755	844.393	843.92	846.773	856.925	1119.7	11927.4	12226	11434.3	12301.8	12128.6	9001.22	9639.11	9536.98	6702.19	1.4792	9529.54	9630.63	11827	7575.76	9732.85
	5.0776_812.5796	0	0.0863	0	4.8194	0	731.803	816.485	614.535	821.219	779.025	432.185	531.313	459.085	313.001	0.2969	307.804	263.111	351.852	213.18	236.323
	5.0994_816.5771	0.4702	0	15.7747	17.4051	9.566	600.062	534.091	565.211	711.656	561.075	387.48	385.673	351.403	206.293	0	258.545	352.207	445.258	250.834	388.162
	5.8755_817.6427	0	0	0	0	0	983.167	970.132	833.886	973.251	939.25	687.546	738.912	739.737	420.782	0	801.879	727.291	962.665	562.069	822.725
	4.6252_824.5431	0	6.1428	7.1175	0	0	650.539	690.194	568.986	697.794	662.184	284.344	290.301	237.278	82.2677	0.0303	87.0869	140.897	145.021	75.1479	82.4496
	4.8381_826.56	0	0	0	0	0	4922.51	5107.98	4625.37	5076.97	5090.45	2888.54	2963	2942.69	1930.42	0	1948.06	1983.33	2368.38	1360.41	1932.5
	4.984_828.5749	0	0	0	0	0	4969.26	4967.12	4664.41	5106.86	5187.49	3041.33	3195.68	3159.42	1866.47	0	1955.25	2220.58	2706.29	1274.1	2217.91
	5.6882_829.643	0	0	0	0	0	2557.45	2703.93	2430.28	2836.24	2618.3	1988.42	1999.72	2066.43	1377.18	0	2243.01	2034.61	2568.3	1692.52	2144.06
	5.3111_830.5912	0	199.65	193.298	171.64	259.851	14642.5	15100.4	13916.2	15027.2	14867.5	9699.25	9879.95	9866.54	6521.96	0	8394.94	8223.12	10033.8	6106.73	8300.67
	6.1252_831.6596	0	0	0	0	0	4068.77	3956.51	3610.55	4112.21	3965.47	2842.32	3101.78	3054.67	2069.72	0	3472.69	3337.49	4048.08	2477.75	3390.02
	5.6521_832.6075	0	0	0	0	700.057	2881.83	3004.15	2615.1	2874.19	2881.07	2416.03	2655.31	3028.03	1996.01	0.0911	3314.72	3498.59	4476.24	2655.66	3545.94
	5.925_843.659	0	0	0	14.6796	0	1729.26	1530.5	1468.82	1823.57	1650.38	1169.24	1286.87	1158.41	756.253	0	1353.49	1285.01	1705.49	902.251	1217.76
	6.3782_845.6749	0	0	0	0	0	2406.17	2214.27	2071.72	2559.1	2472.74	1515.54	1668.44	1684.23	942.636	0.227	1870.13	1786.8	2236.13	1258.3	1861.54
	4.4051_850.5429	0	0	0	0	0	815.828	655.814	665.274	730.086	817.194	115.847	138.373	141.97	66.615	0	0	70.0779	43.2843	0	74.1947
	4.7511_850.5602	0	0	0	0	0	1397.16	1512.84	1086.56	1487.37	1143.22	660.978	684.515	723.922	496.152	0	508.849	615.151	804.672	416.706	531.239
	4.8712_852.5756	0	0	0	0	0	704.139	836.755	160.866	255.759	701.266	465.257	302.434	703.417	441.164	0.8187	575.688	846.544	1042.18	577.688	682.55
	5.237_854.5914	0	0	0	0	0	2785.58	3142.34	2896.87	3536.39	2969.39	2256.98	1921.16	1891.33	1284.7	0	1385.2	1649.3	2141.25	1233.79	1662.91
	5.6746_855.6591	0	0	0	0	0	2611.38	2715.96	2491.33	2560.66	2623.65	1995.6	1905.23	2050.14	1422.65	0	2086.04	2045.85	2441.54	1486.88	1992.06
	5.4135_856.6062	0	0	0	0	0	2033.4	2166.4	1997.45	2207.79	2140.65	1495.67	1552.84	1558.4	940.901	0	1347.14	1506.61	1816.5	1077.59	1640.96
	6.0971_857.6752	0	0	0	0	0	7150.5	6787.11	6166.8	7228.91	6757.16	5145.23	5578.86	5365.02	3610.74	0	5937.79	5848.75	7122.62	4202.17	5829.01
	6.6397_859.6912	0	0	0	0	0	3278.34	3219.93	2810.15	3421.93	3294.56	2305.49	2834.76	2554.21	1740.06	0	2962.62	2770.12	3396.81	2001.8	2802.99
	5.1143_878.5919	0	0	0	0	0	731.582	791.735	627.595	722.124	715.21	472.388	611.395	754.688	446.48	0	716.116	873.787	1135.42	594.601	785.472
	Total Area	113159	107012	100686	105948	119129	3.07587e+06	2.91078e+06	2.41609e+06	2.74546e+06	2.99888e+06	2.19742e+06	2.41393e+06	1.81697e+06	1.19572e+06	1.90711e+06	2.04348e+06	1.66057e+06	2.21051e+06	1.13681e+06	1.57741e+06
					Avg	SD
				Medium	109187	7108.46
				Plasma	2.82942e+06	261707
				Medium 1h	1.90623e+06	462423
				Medium 24h	1.72575e+06	421024
