# Supplementary material for: Sources of biases in the in vitro testing of nanomaterials: the role of the biomolecular corona
Source: Royal Society of Chemistry journal article supplement (doi:10.1039/d3nh00510k), 2024-01-01
Supplement: d3nh00510k4.xlsx [file d3nh00510k4.xlsx]

## Sheet: GNP-Annotated
#NAME	Medium1h_1	Medium1h_2	Medium1h_3	Medium1h_4	Medium1h_5	Medium24h_1	Medium24h_2	Medium24h_3	Medium24h_4	Medium24h_5	Plasma_1	Plasma_2	Plasma_3	Plasma_4	Plasma_5	Medium_1	Medium_2	Medium_3	Medium_4	Medium_5
#CLASS	Pre1h	Pre1h	Pre1h	Pre1h	Pre1h	Pre24h	Pre24h	Pre24h	Pre24h	Pre24h	Plasma	Plasma	Plasma	Plasma	Plasma	Medium	Medium	Medium	Medium	Medium
CAR(10:0) Decanoyl-Carnitine			0.291			0.194								0.267		0	0	0	0	0
CAR(14:1) Trans-2-tetradecenoyl-Carnitine																0	0	0	0	0
CAR(14:0)																0	0	0	0	0
CAR(16:1)																0	0	0	0	0
CAR(16:0)	1.331	2.124	1.013			1.499	2.986	1.083		2.837	0.385		1.147			0	0	0	0	0
CAR(18:2) Elaidic-Carnitine	1.496	1.448					1.408				5.308				1.842	0	0	0	0	0
CAR(18:1)		3.491	7.184	3.104	1.388	2.819	1.424	2.606	2.817	2.484	11.297	9.003	2.306	8.277	10.628	0	0	0	0	0
CAR(18:0) Stearoyl-Carnitine	3.889	6.299	10.226	4.813	14.57	17.847	13.521	4.441	25.232	10.766	26.2	2.471	30.604	34.034	29.541	0	0	0	0	0
Cer (d18:1/16:0)																0	0	0	0	0
Cer (d18:1/20:0)	2.354	1.211	0.924	0.926	1.458	2.157	0.109	2.411	0.533	0.731	1.315	1.895	4.439	0.955	0.762	0	0	0	0	0
Cer (d18:1/22:0)	6.808	4.983	5.662	4.315	3.681	6.687	2.111	5.981	10.866	8.785	11.92	8.9	11.85	9.3	10.599	0	0	0	0	0
Cer (d18:1/24:0)	29.38	15.974	20.677	20.56	10.158	21.858	15.701	18.786	22.446	24.485	36.143	35.237	29.982	29.803	36.854	0	0	0	0	0
Cer (d18:0/24:0)											0.236					0	0	0	0	0
HexCer d18:1/22:0					0.188		0.335	0.707								0	0	0	0	0
HexCer d18:1/24:0																0	0	0	0	0
HexCer d18:1/24:1	8.309	0.353	10.268	7.2	3.706	14.226	9.147	0.437	13.025	9.096	14.93	4.23	9.007	2.805	4.347	0	0	0	0	0
Free Cholesterol [M-H2O+H]+	84866.3	120929	37500.1	34435.2	25008.3	54067.8	24522.9	37025.8	85849.8	38668.7	726566	674649	69510.8	91550.3	543884	0	0	0	0	0
CE(16:0)	8052.84	5900.44	2840.88	3266.99	1468.01	1879.86	532.973	1131.1	3899.23	1028.93	80034.8	53149.5	6240.12	7787.56	53856.4	0	0	0	0	0
CE(18:2)	1557.68	803.404	540.535	404.243	175.277	327.274	113.351	244.44	802.861	113.249	41004.7	40180.8	4523.39	4298.54	23390.5	0	0	0	0	0
DG 34:2 [M+H-H2O]+																0	0	0	0	0
DG34:1 (18:1/16:0)				0.874			0.381							0.994		0	0	0	0	0
DG 34:1 [M+H-H2O]+																0	0	0	0	0
DG 36:3 [M+H-H2O]+	41.512	55.519	30.429	43.371	26.429	31.19	14.728	17.775	32.788	18.455	25.675	35.882	30.276	16.643	11.272	0	0	0	0	0
DG 36:2 [M+H-H2O]+	38.919	60.894	17.52	37.479	16.722	58.416	20.382	20.909	34.282	56.391	24.106	40.956	14.594	33.656	23.107	0	0	0	0	0
DG 36:1 [M+H-H2O]+	3.758	3.694	4.667	5.846	4.17	5.116	4.594	7.137	7.567	7.968	3.722	0.524	4.327	1.82	4.195	0	0	0	0	0
FA 16:1	4.087	13.253		3.94	1.103	10.032	20.88	7.356	33.291	4.375	2.981	0.794	1.85	1.028	1.572	0	0	0	0	0
FA 16:0	324.967	876.042		285.288	332.261	325.086	921.391	334.004	1173.61	220.161	999.674	366.202	300.683	336.989	317.417	0	0	0	0	0
FA 18:3											0.524				0.799	0	0	0	0	0
FA 18:2	33.353	69.942		46.034		43.163	88.449	50.699	130.773	19.934	38.866	12.391	11.314	8.883	10.818	0	0	0	0	0
FA 18:1	94.085	271.585		118.272	60.189	133.4	324.439	131.037	481.36	70.028	253.833	44.248	40.904	45.174	48.469	0	0	0	0	0
FA 18:0	512.082	1299.43		452.907	504.644	578.034	1673.35	524.104	1860.12	356.493	1031.73	611.332	523.126	539.836	493.572	0	0	0	0	0
FA 18:2;O																0	0	0	0	0
FA 20:5	13.689	35.266		6.472	6.361	27.622	56.432	33.33	100.634	11.933	1.266		1.692	0.071	2.111	0	0	0	0	0
FA 20:4	144.205	387.658		133.111	78.22	290.247	591.98	343.039	1178.58	122.785	11.799	23.331	16.476	15.229	15.442	0	0	0	0	0
FA 22:5	18.078	118.194		29.31	14.628	68.21	143.803	74.545	166.338	24.207		2.52				0	0	0	0	0
FA 22:4	5.144	19.777		3.618	2.237	4.01	14.689		26.548	5.043	1.658		1.229			0	0	0	0	0
LPC 16:0	3.659	5.585	5.021	15.416	4.6	12.253	10.208	13.963	16.273	18.53	13.742	14.446	12.921	45.458	20.521	0	0	0	0	0
LPC 17:0	48.905	61.872	62.595	72.972	47.264	76.004	19.327	167.857	87.454	435.738	31.031	76.855	37.686	46.234	44.95	0	0	0	0	0
LPC 18:2																0	0	0	0	0
LPC 18:1	913.837	1447.34		1842.07			677.765	2834.71	1367.84	5170.72	332.111	736.76	299.166		393.183	0	0	0	0	0
LPC 18:0	216.019	55.121	49.009	419.745	33.346	272.83	38.924	157.746	211.317	756.69	248.449	180.494	361.348	194.449	198.434	0	0	0	0	0
LPC 20:1	13.376	20.306	25.668	31.363	5.233	18.627	14.67	60.567	30.162	132.511	2.375		5.262	13.735		0	0	0	0	0
LPC 20:0				0.12											0.753	0	0	0	0	0
LPC 22:6																0	0	0	0	0
LPE 18:0	3809.51	3955.44	543.845	3781.59	2774.65	4952.2	2864.81	4282.62	6971.35	3186.59	5981.48	6216.15	5380.77	5344.97	5548.58	0	0	0	0	0
LPE 20:2	1004.92	891.037		936.9	545.631	884.691	433.719	926.535	975.922	648.839	222.152	246.298	248.123	147.763	101.817	0	0	0	0	0
LPE 20:1	1388.62	1632.1		1450.75	1237.04	1635.15	1195.71	1758.33	2894.09	1284.84	322.263	335.635	394.57	362.029	354.111	0	0	0	0	0
LPE 20:0	3287.23	3258.84		3347.3	2313.57	4700.28	2789.83	4050.9	6976.31	3297.55	4527.74	4463.88	4056.71	3966.55	4091.51	0	0	0	0	0
LPE 24:6	159.61	188.653		73.074	110.541	67.697	56.361	260.998	159.504	103.99	0.382			2.984	11.096	0	0	0	0	0
PE 38:4	2274.5	1838.2		2055.28	1108.34	1438.98	879.304	1192.92	2812.29	1139.08	3911.39	4634.94	4105.2	3995.59	3779.02	0	0	0	0	0
PE 38:3	2325.41	1776.09		2172.51	913.767	1416.26	617.056	1340.58	3088.64	1306.66	3747.1	4480.82	3718.64	3960.95	3727.1	0	0	0	0	0
PE 38:2	7415.7	6105.64		6607.5	3615.94	6142.02	3867.77	4901.74	11536.7	4966.01	11121.4	13182.8	11533.9	11571.6	10551.2	0	0	0	0	0
PE 38:1	1775.02	1877.6		1782.99	1104.92	2580.51	1655.9	2076.05	5210.65	1941.97	2142.64	2540.34	2294.11	2190.95	2004.38	0	0	0	0	0
PC(O-14:0/2:0)	0.089				0.691	0.107				0.22	1.771		2.502			0	0	0	0	0
PC(O-16:0/2:0)	392.926	406.351	429.099	399.076	236.455	532.299	387.341	479.492	592.371	456.307	637.58	686.905	626.78	565.612	688.427	0	0	0	0	0
PC 31:0	18.608	23.58	23.568	18.839	9.386	13.456	17.112	23.013	36.409	32.318	32.577	41.205	34.774	23.108	31.561	0	0	0	0	0
PC(16:0/18:2)	17500.7	13175.4	14297.5	14784.9	6654.29	10153.5	5908.9	8290.98	10910.2	9340.65	26551.2	28512.2	23407	23756.4	25889.8	0	0	0	0	0
PC(16:0/18:1)	8985.65	7450.58	8900.81	7876.08	3927.55	9146.47	5744.75	7300.64	9736.47	7724.11	11780.3	13659.6	10685.6	10976.1	11884.8	0	0	0	0	0
PC(16:0/18:0)	810.165	608.011	790.29	732.08	336.825	754.946	393.891	624.584	892.359	704.536	1091.4	1243.14	985.077	952.784	1122.42	0	0	0	0	0
PC(16:0/20:4)	111.251		57.374	98.044	36.424	8.41	50.324	37.43	30.246	52.589	14.262	27.173	35.214	43.047	62.054	0	0	0	0	0
PC(18:0/18:2)	582.29	158.424	187.861	180.112	79.841	373.239	84.278	476.282	373.689	271.277	1460.25	1783.7	1380.01	321.836	712.004	0	0	0	0	0
PC(18:0/18:1)	1164.3	1181.3	1099.07	291.565	486.087	293.479	1093.06	1422.27	1309.76	695.102	670.885	1073.11	1038.98	788.63	1041.58	0	0	0	0	0
PC(18:0/20:4)	394.815	304.265	428.972	338.952	153.591	286.518	164.452	249.759	328.023	351.76	659.301	800.923	597.229	574.395	889.837	0	0	0	0	0
PC(18:0/20:3)	483.025	380.17	511.593	392.916	210.057	437.004	230.787	397.697	399.043	427.801	699.359	222.056	414.449	86.326	483.08	0	0	0	0	0
PC(16:0/22:6)																0	0	0	0	0
PC(16:0/16:0)	37.459	29.885	39.162	35.662	19.062	21.995	29.856	37.11	24.764	46.015	46.206	25.295	20.872	42.426	52.818	0	0	0	0	0
PC(18:2/20:4)																0	0	0	0	0
PE(16:0/18:0)	44.842	129.205	60.429	78.169	55.157		115.968	126.757	334.111	1064.82	68.768	376.79	260.445		393.076	0	0	0	0	0
PE(18:0/18:2)	260.428	238.154	294.868	326.924	110.043		54.03	186.853	335.245	614.54	943.548	849.661	582.807	391.324	1078.06	0	0	0	0	0
PE(18:0/18:1)	274.405	18.625	476.499	270.826	36.508		137.316	454.543	275.9	194.254	459.053		252.716	51.736	137.491	0	0	0	0	0
PE(18:0/22:4)	92.64	76.345	155.366	189.602	38.512		10.384	24.127	167.408	31.384	525.511	36.807	15.078	34.654	448.21	0	0	0	0	0
PE(18:0/22:6)																0	0	0	0	0
PS-O 38:0	72.645		8.754	276.527	149.852			42.38	39.113		331.589			89.582		0	0	0	0	0
PI 34:2	103.651	43.034	575.947	8.947	1.695	68.857	9.835	67.796	8.604	16					146.027	0	0	0	0	0
PI 36:4																0	0	0	0	0
PI 38:4	758.727	591.732		411.558	277.362	523.938	206.353	2777.34	465.92	224.07					1727.28	0	0	0	0	0
PI 40:6				1.897	1.977	3.692		43.309							5.298	0	0	0	0	0
PS 36:1	1.522				4.118	11.341			5.858	10.361		12.584				0	0	0	0	0
PS 37:1	10419.8	6708.12		7676.37	3906.59	7792.45	3819.95	4940	14100.4	8310.01	12020.2	14739.2	12127	16562.3	12403.6	0	0	0	0	0
PS O-35:2	99.321	61.756		79.372	13.549	6.484	3.975	12.264	9.592	13.285	293.46	188.897	284.558	222.496	236.844	0	0	0	0	0
PS O-38:2	4.331	6.017	461.858			0.666	2.138		7.12	16.384	10.719		11.781	19.518	35.66	0	0	0	0	0
SM 41:1;O2	42.203	732.212		923.308	388.336	1155.5	421.108	808.688	2259.26	1364.67	1381.26	1889.48	1158.86		1435.32	0	0	0	0	0
SM 42:2;O2	9608.73	7972.85		5843.06	2934.61	12081.7	4493.81	67543.2	8783.86	5204.37					73185.9	0	0	0	0	0
SM 42:1;O2	1805.56	1294.34		1459.97	764.87	2135.72	1015.15	1271.95	3895.39	2261.3	2031.13	2449.92	1950.26	2530.72	2028.77	0	0	0	0	0
SM(18:1/16:1)	327.958	191.67	660.56	254.635	84.679	30.471	11.999	386.244	289.66		124946	204.552	25.641	408.04	23.099	0	0	0	0	0
SM(d18:1/16:0)	10254.3	8763.96	32785.4	8794.6	16421.1	31779	9205.18	9904.68	17364.3	15410.4	6.21376e+06	90947.3	11807.5	40260.3	71564.1	0	0	0	0	0
SM(d18:1/18:1)	637.437	531.234	2233.04	599.405	772.355	1974.59	498.671	641.472	1183.06	952.244	428393	5889.6	817.637	2504.18	4367.16	0	0	0	0	0
SM(d18:1/22:1)	624.668	474.047	2120.48	618.333	739.091	2176.1	467.388	596.909	1373.06	1048.45	424402	5865.62	831.736	2294.37	4792.88	0	0	0	0	0
SM(d18:1/22:0)	1026.86	821.236	3541.24	1084.24	1203.75	3788.83	797.616	1042.06	2361.65	1780.03	669522	9588.85	1347.39	3871.76	7725.47	0	0	0	0	0
SM(d18:1/23:0)	337.825	220.534	1080.4	293.488	331.435	1020.21	236.611	294.572	613.97	497.458	210341	3128.95	422.033	1206.17	2600.07	0	0	0	0	0
SM(d18:1/24:1)	1820.56	1489.18	6381.63	1876.1	2144.05	6633.08	1419.29	1795.01	4134.82	3068.14	1.13812e+06	16567.7	2349.99	6683.12	12983.7	0	0	0	0	0
SM(d18:1/24:0)	517.986	404.576	1770.65	508.528	705.706	1800.46	416.569	527.378	1093.91	925.507	312779	4518.49	650.411	1847.5	3863.35	0	0	0	0	0
SM(18:1/20:0)	471.568	372.674	1662.67	465.695	550.455	1630.03	364.351	443.819	1016.08	770.787	362145	5047.91	707.577	1983.85	4262.54	0	0	0	0	0
SM(18:0/18:0)	126.453	93.09	436.064	127.252	140.953	485.351	83.892	112.786	275.404	226.268	93514.8	1309.29	178.754	492.389	1069.14	0	0	0	0	0
SM(18:0/22:0)	111.365	87.247	374.776	111.341	93.351	342.814	65.038	82.697	223.192	161.645	71506.3	1035.77	133.55	377.642	799.145	0	0	0	0	0
TG 48:1; TG(16:0/16:0/16:1)	451187	39531	117496	806712	29130.7	62027	8.18742e+06	21868.9	207968	191070	1.06384e+06	4.21423e+06	6.56082e+06	103149	565554	0	0	0	0	0
TG 48:2; TG(16:0/16:1/16:1)	392650	33091.4	104401	728910	22861.3	33130.2	3.40871e+06	12122.2	135611	109932	1.08184e+07	9.65935e+06	6.65228e+06	100430	1.01435e+06	0	0	0	0	0
TG 48:0; TG(16:0/16:0/16:0)	150701	19539.6	51674.2	378063	11184.6	30252.1	4.25963e+06	11109.5	71449.1	93861	4.92472e+06	3.13529e+06	2.9905e+06	44961.7	468218	0	0	0	0	0
TG 50:2; TG(16:0/18:1/16:1)	1.3955e+06	123735	361076	2.52348e+06	96375.2	153737	2.04747e+07	56383.2	513989	462555	3.40823e+07	3.13583e+07	2.0967e+07	335345	3.2066e+06	0	0	0	0	0
TG 51:2; TG(16:0/17:1/18:1)	177388	15898.2	43870.8	332934	12075.2	19235.8	2.45101e+06	6959.29	68195.8	73198.7	4.561e+06	3.86425e+06	2.70963e+06	41256.3	443093	0	0	0	0	0
TG 52:4; TG(16:0/18:2/18:2)	2.02175e+06	179159	524358	3.62251e+06	145580	119686	1.30129e+07	52565.5	500725	367940	5.54082e+07	5.03951e+07	3.38348e+07	550675	4.6775e+06	0	0	0	0	0
TG 52:3; TG(16:0/18:1/18:2)	3.53401e+06	315403	906424	6.3238e+06	248938	289309	3.6901e+07	110824	1.02649e+06	836412	9.052e+07	8.33179e+07	5.46925e+07	897820	8.36165e+06	0	0	0	0	0
TG 52:3; TG(16:0/16:0/20:3)	3.54908e+06	315403	942133	6.85774e+06	250173	289309	3.70125e+07	111369	1.03074e+06	836412	9.11233e+07	9.22416e+07	5.48795e+07	901795	8.42895e+06	0	0	0	0	0
TG 52:2; TG(16:0/18:1/18:1)	1.32127e+06	123536	327483	2.35304e+06	112744	171070	2.59888e+07	60051.7	528175	1.04795e+06	2.99884e+07	2.70624e+07	1.85369e+07	310959	2.98943e+06	0	0	0	0	0
TG 52:1; TG(16:0/18:0/18:1)	1.43177e+06	137264	351417	2.60271e+06	107500	182850	2.6028e+07	66534.2	597862	531474	3.40665e+07	3.11727e+07	2.08183e+07	341588	3.14418e+06	0	0	0	0	0
TG 52:0; TG(16:0/18:0/18:0)	284884	26898.5	69711.9	550104	18606.8	35492.4	4.96277e+06	13292.5	124747	111730	7.50678e+06	6.79314e+06	4.55236e+06	68036.2	685947	0	0	0	0	0
TG 54:6; TG(18:2/18:2/18:2)	270974	18126.4	65930.2	447063	9871.15	7496.76	660958	3401.36	44170.5	22754.7	1.15139e+07	1.07118e+07	7.02802e+06	104665	1.03672e+06	0	0	0	0	0
TG 54:4; TG(16:0/20:2/18:2)	808075	72411.5	214126	1.49545e+06	55672.3	61626.3	5.5464e+06	24698.9	236119	182946	2.19915e+07	2.00095e+07	1.33301e+07	218938	1.56178e+06	0	0	0	0	0
TG 54:0; TG(18:0/18:0/18:0)	67128.7	5695.33	16577.4	130106	2941.28	7786.02	1.00919e+06	2912.59	27351.6	25784.9	1.80681e+06	1.63921e+06	1.08169e+06	16068.3	170914	0	0	0	0	0
TG 56:8; TG(18:2/20:4/18:2)	15422	1088.71	4293.89	30476.5	725.58	188.291	15615.9	94.594	2100.07	648.16	773938	690816	474997	6870.84	80616.9	0	0	0	0	0

## Sheet: GO_Annotated
#NAME	Medium1h_1	Medium1h_2	Medium1h_3	Medium1h_4	Medium1h_5	Medium24h_1	Medium24h_2	Medium24h_3	Medium24h_4	Medium24h_5	Plasma_1	Plasma_2	Plasma_3	Plasma_4	Plasma_5	Medium_1	Medium_2	Medium_3	Medium_4	Medium_5
#CLASS	Pre1h	Pre1h	Pre1h	Pre1h	Pre1h	Pre24h	Pre24h	Pre24h	Pre24h	Pre24h	Plasma	Plasma	Plasma	Plasma	Plasma	Medium	Medium	Medium	Medium	Medium
CAR(10:0) Decanoyl-Carnitine				1.07	2.345	0.625	6.654	2.106	3.894	1.235	6.824	1.287	0.973	8.702		0	0	0	0	0
CAR(14:1) Trans-2-tetradecenoyl-Carnitine	0.192	0.715	0.092				0.581	1.559	0.115			0.646		1.238		0	0	0	0	0
CAR(14:0)	0.542	1.689	3.302	0.831		1.617	0.814		0.815		0.348	1.211		2.053		0	0	0	0	0
CAR(16:1)			0.517			0.561			2.174			0.472		0.138		0	0	0	0	0
CAR(16:0)	2.067		1.666				1.274							0.294		0	0	0	0	0
CAR(18:2) Elaidic-Carnitine	1.816	1.276	3.062	3.879			17.577	7.151	1.211			0.222	1.904	2.453		0	0	0	0	0
CAR(18:1)		0.332	1.292						0.289	1.295				0.294		0	0	0	0	0
CAR(18:0) Stearoyl-Carnitine			44.668	4.263	1.581	13.659		1.475		9.158	59.994	17.775		39.09	0.176	0	0	0	0	0
Cer (d18:1/16:0)	4.764	5.19	4.77	5.856	9.738	3.891	3.24	4.737	4.481	8.053	4.943	11.741	6.572	5.666	3.869	0	0	0	0	0
Cer (d18:1/20:0)		1.108			10.816				0.537	13.956					4.922	0	0	0	0	0
Cer (d18:1/22:0)		1.681	0.714	4.161	4.711		1.487			9.02		3.643			5.924	0	0	0	0	0
Cer (d18:1/24:0)	6.155	5.541	8.748	15.941	12.002	11.161	14.593	11.87	8.186	11.134	8.792	14.587	11.301	11.656	16.238	0	0	0	0	0
Cer (d18:0/24:0)	3.014	2.9	3.626	6.966	2.349	3.578	4.804	5.485	5.014	5.043	4.58	14.094	3.913	5.331	0.936	0	0	0	0	0
HexCer d18:1/22:0	0.256	3.485				1.496	3.957	0.527	0.095				2.062			0	0	0	0	0
HexCer d18:1/24:0				4.932	6.09	11.066		5.953	2.556	7.22	1.333		4.146			0	0	0	0	0
HexCer d18:1/24:1	0.683	2.08		4.152		2.026	7.444				2.992	6.79	5.21	5.843		0	0	0	0	0
Free Cholesterol [M-H2O+H]+	9883.24	7385.43	4573.58	7952.81		7064.56	7527.04	2818.32	5595.62		5955.92	2350.64	9011.6	4757.74		0	0	0	0	0
CE(16:0)	7477.34	4103.96	1926.73	3988.38	4263.93	1689.67	4575.02	1292.76	1762.7	862.816	6714.1	5570.08	12514.8	5957.53	167405	0	0	0	0	0
CE(18:2)	1256.79	586.044	219.358	221.697	729.738	162.424	124.032		149.925	170.953	1761.81	1025.69	2982.54	1818.66	57464.1	0	0	0	0	0
DG 34:2 [M+H-H2O]+	5.405	20.376	2.513	6.725	3.377	12.099	16.689	5.952	7.554	0.964	15.935	6.449	17.267	15.247	1.49	0	0	0	0	0
DG34:1 (18:1/16:0)	0.3	0.39		2.081	0.895	3.26	1.014		0.582	0.28	1.011		0.221	0.887	0.655	0	0	0	0	0
DG 34:1 [M+H-H2O]+	39.221	39.082	32.057	23.573	7.629	67.319	61.771	26.725	40.028	17.156	45.381	19.299	51.443	41.17	9.308	0	0	0	0	0
DG 36:3 [M+H-H2O]+	5.817	7.164	6.608	6.023	1.399	14.479	6.709	2.207	12.331	1.971	16.182	4.006	19.206	11.133	4.41	0	0	0	0	0
DG 36:2	32.584	42.736	30.61	25.244	5.912	54.686	57.46	24.883	41.394	12.659	48.257	14.49	52.724	42.617	5.472	0	0	0	0	0
DG 36:1 [M+H-H2O]+	1.221	2.571	6.809	2.345	0.268	6.773	12.163	2.587	3.155		5.789	1.72	6.695	3.274		0	0	0	0	0
LPC 16:0	287.205	343.175	224.82	216.15	139.666	261.675	333.946	387.227	552.95	162.896	732.853	1018.04	789.72	1645.92	386.214	0	0	0	0	0
LPC 17:0	7.825	4.668	0.961	4.318	2.878	4.224	20.422	7.663	15.064	10.558	13.146	3.72	18.756	13.334	12.144	0	0	0	0	0
LPC 18:2	4.035	15.729	8.483	14.197		4.376	8.747	10.49	33.236		39.641	26.78	30.93	78.456		0	0	0	0	0
LPC 18:1	81.527	30.549	46.898	44.046	120.337	57.299	56.909	62.613	97.917	73.039	51.67	88.015	73.853	151.702	163.566	0	0	0	0	0
LPC 18:0	716.047	571.859	513.128	351.252	578.752	634.945	1036.47	1131.81	1030.23	560.724	1151.3	899.713	1475.53	2750.76	1845.77	0	0	0	0	0
LPC 20:1	4.78		1.347				0.171	5.853				1.03	1.198	2.397		0	0	0	0	0
LPC 20:0	14.465	4.447	8.153	3.139	2.366	9.51	32.449	11.679	37.524	1.962	0.456		6.191	12.968		0	0	0	0	0
LPC 22:6	3.575							5.213	0.081		4.265		0.435			0	0	0	0	0
PC(O-14:0/2:0)	15.717	18.33	21.248	88.926	9.755	15.742	17.865	32.455	39.576	18.278	44.88	424.27	50.234	58.72	25.654	0	0	0	0	0
PC(O-16:0/2:0)	1.808	0.634	2.162	8.936	27.255	0.992	1.944	2.906		23.495	3.205	16.113	4.281	3.814	97.336	0	0	0	0	0
PC 31:0	16.04	9.85	9.875	13.688	5.588	21.107	20.019	15.217	17.814	0.777	13.531	15.554	15.215	18.109	0.724	0	0	0	0	0
PC(16:0/18:2)	5944.72	5734.58	5160.51	4888.83	5711.03	4135.15	5014.52	3750	4449.57	4305.17	10101.7	11955.9	11868.5	10409.6	11471.1	0	0	0	0	0
PC(16:0/18:1)	3272.73	3063.69	3063.99	3020.88	2999.07	4020.4	4442.36	3121.37	3133.81	3664.4	5309.26	5490.8	5657.94	5127.98	5538.12	0	0	0	0	0
PC(16:0/18:0)	236.998	266.633	204.21	130.63	267.499	146.523	317.917	116.763	5.316	278.199	371.905	254.555	461.068	447.437	485.222	0	0	0	0	0
PC(16:0/20:4)	688.22	740.843	775.744	450.163	24.467	449.68	681.078	582.063	428.281		794.289	743.017	612.926	1007.8		0	0	0	0	0
PC(18:0/18:2)	2743.86	2579.03	2365.36	2424.08	1656.46	2619.37	3108.44	2091.21	2102.69	1553.36	4619.06	5002.1	5091.63	4660.1	3131.7	0	0	0	0	0
PC(18:0/18:1)	540.166	511.784	491.606	620.427	195.506	885.545	905.356	694.414	569.049	382.663	601.195	817.735	676.592	618.391	261.097	0	0	0	0	0
PC(18:0/20:4)	470.345	455.466	416.693	455.996	382.926	455.678	499.951	436.206	398.591	413.032	806.633	988.178	916.376	866.085	810.229	0	0	0	0	0
PC(18:0/20:3)	199.382	197.988	183.072	239.385	12.289	245.034	267.977	227.886	202.988	66.231	299.453	338.639	372.02	302.102	11.131	0	0	0	0	0
PC(16:0/22:6)	410.1	377.957	411.275	404.729	60.625	190.81	423.469	298.253	407.887	2.859	353.041	524.08	173.772	621.288	26.259	0	0	0	0	0
PC(16:0/16:0)	208.835	197.929	207.439	253.667	127.738	313.105	342.972	241.061	219.063	190.926	280.41	365.65	295.525	277.515	164.837	0	0	0	0	0
PC(18:2/20:4)	491.981	472.683	404.842	407.928		394.384	444.372	397.524	433.697		948.974	1083.53	1126	1022.24	978.763	0	0	0	0	0
TG 48:1; TG(16:0/16:0/16:1)	2733.98	2492.52	2334.89	2415.41	5343.37	18222.2	3797.53	2269.62	1970.22	3035.82	3397.45	5935.21	15112	3364.13	1.81284e+06	0	0	0	0	0
TG 48:2; TG(16:0/16:1/16:1)	904.476	792.448	673.687	872.481	3232.6	5110.23	1052.65	623.011	540.867	1677.51	1277.44	1977.2	6493.99	1301.63	1.27649e+06	0	0	0	0	0
TG 48:0; TG(16:0/16:0/16:0)	1165.12	1255.42	958.424	1094.83	2424.04	8909.09	1512.65	1060.82	987.975	1380.45	1464.65	2229.42	6308.93	1404.07	698348	0	0	0	0	0
TG 50:2; TG(16:0/18:1/16:1)	8112.75	7168.93	6831.55	6953.06	13345.8	45639.1	9606.11	5909.4	5234.02	6874.56	10301.9	18626.6	45193.5	10623.7	4.72986e+06	0	0	0	0	0
TG 51:2; TG(16:0/17:1/18:1)	891.772	826.491	795.744	805.118	2086.82	5483.77	1103.68	697.594	598.152	1070.98	1119.47	2153.88	4968.06	1216.11	710717	0	0	0	0	0
TG 52:4; TG(16:0/18:2/18:2)	2952.72	2460.93	2274.94	2481.76	10023.5	7940.4	1700.67	1026.65	887.653	2928.41	5086.22	9556.28	23488.7	5516.68	4.63566e+06	0	0	0	0	0
TG 52:3; TG(16:0/18:1/18:2)	15512.6	13618.1	13928.8	13645.8	24572.5	66226.5	13519.4	9227.82	8096.97	9599.36	21619.4	39089.5	96924.1	21809.4	9.31096e+06	0	0	0	0	0
TG 52:3; TG(16:0/16:0/20:3)	15512.6	13618.1	13928.8	13658.1	25186.6	66226.5	13519.4	9237.27	8096.97	9740.49	21619.4	39089.5	96951.3	21809.4	9.47869e+06	0	0	0	0	0
TG 52:2; TG(16:0/18:1/18:1)	25441	22774	24146.6	21055.7	24234.8	158442	28878	21192.1	18702	12175.7	28521.4	57236.9	138091	31912.9	6.85671e+06	0	0	0	0	0
TG 52:1; TG(16:0/18:0/18:1)	7216.92	6101.62	6539.85	6250.18	12836.9	45102.8	9149.67	4899.46	5158.16	6535.71	8509.56	16094.5	37619.2	8914.52	4.21929e+06	0	0	0	0	0
TG 52:0; TG(16:0/18:0/18:0)	690.249	415.021	499.5	507.196	43.343	4665.77	947.025	461.857	349.315	846.715	562.885	562.797	3151.87	489.133	539428	0	0	0	0	0
TG 54:6; TG(18:2/18:2/18:2)	294.989	291.969	200.204	198.219	413.24	980.322	186.319	139.48	121.545	139.236	531.289	838.366	2244.21	544.154	201997	0	0	0	0	0
TG 54:4; TG(16:0/20:2/18:2)	2672.52	2474.65	2414.34	2412.84	4116.22	10425.9	2061.27	1597.72	1428.09	1552.65	3771.55	6774.7	16824.7	3845.62	1.49411e+06	0	0	0	0	0
TG 54:0; TG(18:0/18:0/18:0)	89.837	117.016	41.987	65.307	305.034	633.767	124.071	77.726	65.434	212.46	64.079	104.072	399.819	99.265	88863.9	0	0	0	0	0
TG 56:8; TG(18:2/20:4/18:2)	20.008	11.863	10.86	13.384	12.667	6.457	3.303	6.372	6.836	1.418	53.742	81.033	268.191	52.818	31884.6	0	0	0	0	0
SM(18:1/16:1)	24.326	59.809	89.586	80.184	143.346	44.851	111.908	102.467	101.932	258.745	72.94	84.251	124.032	125.158	168.128	0	0	0	0	0
SM(d18:1/16:0)	3399.41	3385.83	3705.07	3414.39	6985.79	4369.99	4722.91	3605.8	3796.89	7282.38	4791.72	5841.74	5360.98	4657.98	13111.8	0	0	0	0	0
SM(d18:1/18:1)	125.022	120.928	121.839	123.208	359.681	161.933	186.745	127.393	126.431	403.906	208.801	281.243	241.422	220.774	910.336	0	0	0	0	0
SM(d18:1/22:1)	173.927	165.549	165.875	207.503	500.96	216.831	248.218	175.068	162.19	522.139	204.827	343.279	237.059	215.494	934.725	0	0	0	0	0
SM(d18:1/22:0)	200.951	192.68	207.857	275.352	596.764	272.152	307.763	261.833	195.239	709.588	242.545	401.409	276.415	248.478	1089.25	0	0	0	0	0
SM(d18:1/23:0)	79.039	72.959	82.774	105.419	198.972	102.958	128.617	109.014	72.576	226.587	95.327	178.679	106.59	102.794	352.807	0	0	0	0	0
SM(d18:1/24:1)	362.95	369.379	382.373	503.309	1150.37	433.745	544.903	470.707	328.876	1335.86	458.887	784.698	532.327	479.442	2286.56	0	0	0	0	0
SM(d18:1/24:0)	108.566	107.913	115.806	150.318	333.898	150.807	175.819	161.326	101.403	390.798	114.549	239.803	134.774	122.727	540.127	0	0	0	0	0
SM(18:1/20:0)	116.684	116.83	118.871	140.857	345.418	150.31	170.148	144.727	108.54	428.023	161.086	258.498	169.227	165.637	744.097	0	0	0	0	0
SM(18:0/18:0)	14.726	9.906	15.464	12.812	60.432	19.968	23.146	9.071	8.014	91.745	9.671	25.852	12.857	28.075	198.007	0	0	0	0	0
SM(18:0/22:0)	18.123	13.042	17.117	22.787	30.399	30.316	29.982	5.127	21.098	35.802	27.662	37.159	28.811	28.835	47.83	0	0	0	0	0
PE(16:0/18:0)	119.993	69.853	63.677	78.464	30.399	123.448	148.949	77.015	94.912	35.802	141.226	115.615	1906.19	127.203	47.83	0	0	0	0	0
PE(18:0/18:2)	280.769	183.734	164.443	102.045	824.155	52.233	192.402	103.298	160.134	127.084	447.626	305.893	5265.97	372.82	44.024	0	0	0	0	0
PE(18:0/18:1)	156.904	90.273	244.314	168.026	127.18	344.551	439.961	259.382	300.758	129.995	345.806	230.942	3629.64	200.667	4.588	0	0	0	0	0
PE(18:0/22:4)	164.852	133.882	92.701	69.843	108.432	89.21	79.593	64.047	92.039	32.545	277.864	30.067	4299.2	195.363	160.446	0	0	0	0	0
PE(18:0/22:6)	33.686		15.669	12.878										7.794		0	0	0	0	0
PS-O 38:0	282.274	41.753	90.282	218.838	876.889	70.212	86.503	32.839	240.455	40.2	591.536	626.671	7466.65	465.406	383.883	0	0	0	0	0
FA 16:1					4.473					5.226					0.521	0	0	0	0	0
FA 16:0	55.088	65.276	83.611	50.465	3405.53	486.899	46.539	11.223	84.315	2086.83	93.112	138.614	20.55	61.908	144.932	0	0	0	0	0
FA 18:3	0.042			0.019	2.784	1.054	0.027	0.024			0.182	0.074	0.215			0	0	0	0	0
FA 18:2	0.741	1.759	1.076	0.65	48.205	4.517	0.495	0.158	0.806	36.835	1.26	1.749	0.211	1.405	3.448	0	0	0	0	0
FA 18:1	63.839	101.194	77.363	46.323	6907.41	479.442	61.475	10.59	70.403	4279.32	89.789	95.525	14.408	72.299	313.636	0	0	0	0	0
FA 18:0	81.646	118.7	93.554	54.046	6911.51	554.101	78.903	16.368	73.215	4302.52	107.804	108.648	24.701	88.864	313.878	0	0	0	0	0
FA 18:2;O																0	0	0	0	0
FA 20:5			0.257	0.018				0.161	0.071		0.095		0.081			0	0	0	0	0
FA 20:4	0.019	0.007							0.038							0	0	0	0	0
FA 22:5			0.179													0	0	0	0	0
FA 22:4	0.032	0.092		0.106			0.034	0.015						0.027		0	0	0	0	0
LPE 18:0	252.217	409.074	230.941	227.293	305.435	332.274	253.363	472.999	783.774	306.373	1698.87	1602.82	835.038	1117.45	6133.83	0	0	0	0	0
LPE 20:2			10.514	9.332		18.18	6.152	8.687	57.527		94.216	60.663	16.699	22.597		0	0	0	0	0
LPE 20:1	71.624	43.371	62.971	22.042	27.063	74.308	56.413	59.131	82.761	39.564	69.871	15.336	31.06	74.453	165.863	0	0	0	0	0
LPE 20:0	488.443	640.221	417.282	444.453	490.816	619.373	610.757	751.202	930.961	716.056	2061.4	1797.91	967.879	1043.11	6774.74	0	0	0	0	0
LPE 24:6	4.412						0.304				4.045		2.56	0.479		0	0	0	0	0
PE 38:4	1170.86	1118.28	965.854	977.906	543.202	717.774	893.7	601.847	1162.23	472.758	2179.89	2003.3	2362.01	2371.7	1841.47	0	0	0	0	0
PE 38:3	1247.04	838.283	1102.39	862.974	556.026	916.981	1083.81	511.399	1116.01	482.432	2256.91	1450.61	2186.32	2336.05	1640.39	0	0	0	0	0
PE 38:2	3809.56	3456.91	2946.04	3310.3	1583.12	3550.36	4162.05	2501.01	4060.04	1989.08	5994.99	5411.04	6338.85	6410.52	3851.68	0	0	0	0	0
PE 38:1	910.394	917.279	937.49	1068.12	665.825	1450.18	1619.25	963.456	1449.44	1077.13	1104.91	1144.3	1338.32	1315.05	973.624	0	0	0	0	0
PI 34:2	2.977	4.59	0.864	4.721	1.925	5.518	1.601	7.829	14.4	3.343	30.003	24.277	15.155	3.865	6.23	0	0	0	0	0
PI 36:4										1.772					1.012	0	0	0	0	0
PI 38:4	132.603	182.418	65.602	147.203	96.207	65.456	67.999	5.487	72.43	102.773	303.962	408.408	340.392	266.142	376.66	0	0	0	0	0
PI 40:6		0.56	1.108	0.298			1.03		0.448			0.085	2.345			0	0	0	0	0
PS 36:1	12.652	23.209	9.174	10.321	8.301			7.076	16.787	15.272		64.429	30.389	46.467	55.484	0	0	0	0	0
PS 37:1	4087.8	3843.2	3405.54	4202.56	3750.07	3968.81	3419.75	2819.79	4066.71	3594.12	7021.9	9170.37	8013.4	8235.12	9100.12	0	0	0	0	0
PS O-35:2	109.416	71.859	11.051	64.077	51.424	2.902	10.959	10.331	82.909		271.224	47.405	66.171	222.999	453.683	0	0	0	0	0
PS O-38:2	16.78	34.388	25.344	29.876	6.106	7.155	21.58	21.012	23.996	14.487	123.224	135.27	76.288	101.537	57.508	0	0	0	0	0
SM 41:1;O2	368.887	239.326	267.221	334.27	272.528	524.332	484.665	198.525	258.013	321.44	463.713	609.641	422.408	404.455	428.478	0	0	0	0	0
SM 42:2;O2	2296.34	1711.09	1505.54	1307.73	1066.4	2319.28	2367.18	1586.11	1350.78	1993.55	2706.16	2661.88	2445.32	2328.76	2322.98	0	0	0	0	0
SM 42:1;O2	562.072	334.825	535.779	543.477	423.242	884.032	766.659	441.757	418.992	515.139	630.043	629.996	631.459	781.11	574.102	0	0	0	0	0
