# Supplementary material for: Sources of biases in the in vitro testing of nanomaterials: the role of the biomolecular corona
Source: Royal Society of Chemistry journal article supplement (doi:10.1039/d3nh00510k), 2024-01-01
Supplement: d3nh00510k5.xlsx [file d3nh00510k5.xlsx]

## Sheet: GNP association networks
Feature ID	Label	Entry	Protein names	Gene Names	Organism	Cluster
A1AG1_HUMAN	A1AG1_HUMAN	P02763	Alpha-1-acid glycoprotein 1 (AGP 1) (Orosomucoid-1) (OMD 1)	ORM1 AGP1	Homo sapiens (Human)	1
A1AG2_HUMAN	A1AG2_HUMAN	P19652	Alpha-1-acid glycoprotein 2 (AGP 2) (Orosomucoid-2) (OMD 2)	ORM2 AGP2	Homo sapiens (Human)	1
AMBP_HUMAN	AMBP_HUMAN	P02760	Protein AMBP (Protein HC) [Cleaved into: Alpha-1-microglobulin (EC 1.6.2.-) (Alpha-1 microglycoprotein) (Complex-forming glycoprotein heterogeneous in charge); Inter-alpha-trypsin inhibitor light chain (ITI-LC) (Bikunin) (EDC1) (HI-30) (Uronic-acid-rich protein); Trypstatin]	AMBP HCP ITIL	Homo sapiens (Human)	1
ANT3_HUMAN	ANT3_HUMAN	P01008	Antithrombin-III (ATIII) (Serpin C1)	SERPINC1 AT3 PRO0309	Homo sapiens (Human)	1
ANXA1_BOVIN	ANXA1_BOVIN	P46193	Annexin A1 (Annexin I) (Annexin-1) (Calpactin II) (Calpactin-2) (Chromobindin-9) (Lipocortin I) (Phospholipase A2 inhibitory protein) (p35) [Cleaved into: Annexin Ac2-26]	ANXA1 ANX1	Bos taurus (Bovine)	1
APOA5_HUMAN	APOA5_HUMAN	Q6Q788	Apolipoprotein A-V (Apo-AV) (ApoA-V) (Apolipoprotein A5) (Regeneration-associated protein 3)	APOA5 RAP3 UNQ411/PRO773	Homo sapiens (Human)	1
APOC1_HUMAN	APOC1_HUMAN	P02654	Apolipoprotein C-I (Apo-CI) (ApoC-I) (Apolipoprotein C1) [Cleaved into: Truncated apolipoprotein C-I]	APOC1	Homo sapiens (Human)	1
APOC3_HUMAN	APOC3_HUMAN	P02656	Apolipoprotein C-III (Apo-CIII) (ApoC-III) (Apolipoprotein C3)	APOC3	Homo sapiens (Human)	1
ARY1_BOVIN	ARY1_BOVIN	Q1JPA6	Arylamine N-acetyltransferase 1 (EC 2.3.1.5) (Arylamide acetylase 1) (N-acetyltransferase type 1) (NAT-1)	NAT1	Bos taurus (Bovine)	1
ASSY_BOVIN	ASSY_BOVIN	P14568	Argininosuccinate synthase (EC 6.3.4.5) (Citrulline--aspartate ligase)	ASS1	Bos taurus (Bovine)	1
BPIB1_BOVIN	BPIB1_BOVIN	Q8SPF8	BPI fold-containing family B member 1 (Long palate, lung and nasal epithelium carcinoma-associated protein 1) (von Ebner minor salivary gland protein) (VEMSGP)	BPIFB1 LPLUNC1	Bos taurus (Bovine)	1
BTD_HUMAN	BTD_HUMAN	P43251	Biotinidase (Biotinase) (EC 3.5.1.12)	BTD	Homo sapiens (Human)	1
C1R_HUMAN	C1R_HUMAN	P00736	Complement C1r subcomponent (EC 3.4.21.41) (Complement component 1 subcomponent r) [Cleaved into: Complement C1r subcomponent heavy chain; Complement C1r subcomponent light chain]	C1R	Homo sapiens (Human)	1
CALD1_BOVIN	CALD1_BOVIN	Q27976	Non-muscle caldesmon (CDM) (L-caldesmon)	CALD1	Bos taurus (Bovine)	1
CAN1_BOVIN	CAN1_BOVIN	Q27970	Calpain-1 catalytic subunit (EC 3.4.22.52) (Calcium-activated neutral proteinase 1) (CANP 1) (Calpain mu-type) (Calpain-1 large subunit) (Micromolar-calpain) (muCANP)	CAPN1	Bos taurus (Bovine)	1
CATD_BOVIN	CATD_BOVIN	P80209	Cathepsin D (EC 3.4.23.5)	CTSD	Bos taurus (Bovine)	1
CBR1_BOVIN	CBR1_BOVIN	Q3SZD7	Carbonyl reductase [NADPH] 1 (EC 1.1.1.184) (15-hydroxyprostaglandin dehydrogenase [NADP(+)]) (EC 1.1.1.196, EC 1.1.1.197) (20-beta-hydroxysteroid dehydrogenase) (Alcohol dehydrogenase [NAD(P)+] CBR1) (EC 1.1.1.71) (NADPH-dependent carbonyl reductase 1) (Prostaglandin 9-ketoreductase) (PG-9-KR) (Prostaglandin-E(2) 9-reductase) (EC 1.1.1.189)	CBR1	Bos taurus (Bovine)	1
CD9_HUMAN	CD9_HUMAN	P21926	CD9 antigen (5H9 antigen) (Cell growth-inhibiting gene 2 protein) (Leukocyte antigen MIC3) (Motility-related protein) (MRP-1) (Tetraspanin-29) (Tspan-29) (p24) (CD antigen CD9)	CD9 MIC3 TSPAN29 GIG2	Homo sapiens (Human)	1
CO7_HUMAN	CO7_HUMAN	P10643	Complement component C7	C7	Homo sapiens (Human)	1
CPNS1_BOVIN	CPNS1_BOVIN	P13135	Calpain small subunit 1 (CSS1) (Calcium-activated neutral proteinase small subunit) (CANP small subunit) (Calcium-dependent protease small subunit) (CDPS) (Calcium-dependent protease small subunit 1) (Calpain regulatory subunit)	CAPNS1 CAPN4	Bos taurus (Bovine)	1
ENOA_HUMAN	ENOA_HUMAN	P06733	Alpha-enolase (EC 4.2.1.11) (2-phospho-D-glycerate hydro-lyase) (C-myc promoter-binding protein) (Enolase 1) (MBP-1) (MPB-1) (Non-neural enolase) (NNE) (Phosphopyruvate hydratase) (Plasminogen-binding protein)	ENO1 ENO1L1 MBPB1 MPB1	Homo sapiens (Human)	1
EPCR_BOVIN	EPCR_BOVIN	Q28105	Endothelial protein C receptor (Activated protein C receptor) (APC receptor) (Endothelial cell protein C receptor) (CD antigen CD201)	PROCR EPCR	Bos taurus (Bovine)	1
EZRI_HUMAN	EZRI_HUMAN	P15311	Ezrin (Cytovillin) (Villin-2) (p81)	EZR VIL2	Homo sapiens (Human)	1
F13A_HUMAN	F13A_HUMAN	P00488	Coagulation factor XIII A chain (Coagulation factor XIIIa) (EC 2.3.2.13) (Protein-glutamine gamma-glutamyltransferase A chain) (Transglutaminase A chain)	F13A1 F13A	Homo sapiens (Human)	1
FA12_HUMAN	FA12_HUMAN	P00748	Coagulation factor XII (EC 3.4.21.38) (Hageman factor) (HAF) [Cleaved into: Coagulation factor XIIa heavy chain; Beta-factor XIIa part 1; Coagulation factor XIIa light chain (Beta-factor XIIa part 2)]	F12	Homo sapiens (Human)	1
FIBG_HUMAN	FIBG_HUMAN	P02679	Fibrinogen gamma chain	FGG PRO2061	Homo sapiens (Human)	1
FILA_HUMAN	FILA_HUMAN	P20930	Filaggrin	FLG	Homo sapiens (Human)	1
G3P_HUMAN	G3P_HUMAN	P04406	Glyceraldehyde-3-phosphate dehydrogenase (GAPDH) (EC 1.2.1.12) (Peptidyl-cysteine S-nitrosylase GAPDH) (EC 2.6.99.-)	GAPDH GAPD CDABP0047 OK/SW-cl.12	Homo sapiens (Human)	1
GAPR1_HUMAN	GAPR1_HUMAN	Q9H4G4	Golgi-associated plant pathogenesis-related protein 1 (GAPR-1) (Golgi-associated PR-1 protein) (Glioma pathogenesis-related protein 2) (GliPR 2)	GLIPR2 C9orf19 GAPR1	Homo sapiens (Human)	1
GPX1_BOVIN	GPX1_BOVIN	P00435	Glutathione peroxidase 1 (GPx-1) (GSHPx-1) (EC 1.11.1.9) (Cellular glutathione peroxidase)	GPX1	Bos taurus (Bovine)	1
HBB_HUMAN	HBB_HUMAN	P68871	Hemoglobin subunit beta (Beta-globin) (Hemoglobin beta chain) [Cleaved into: LVV-hemorphin-7; Spinorphin]	HBB	Homo sapiens (Human)	1
HEBP1_BOVIN	HEBP1_BOVIN	Q148C9	Heme-binding protein 1	HEBP1	Bos taurus (Bovine)	1
HPPD_BOVIN	HPPD_BOVIN	Q5EA20	4-hydroxyphenylpyruvate dioxygenase (EC 1.13.11.27) (4-hydroxyphenylpyruvic acid oxidase) (4HPPD) (HPD) (HPPDase)	HPD	Bos taurus (Bovine)	1
HV349_HUMAN	HV349_HUMAN	A0A0A0MS15	Immunoglobulin heavy variable 3-49	IGHV3-49	Homo sapiens (Human)	1
IBP2_HUMAN	IBP2_HUMAN	P18065	Insulin-like growth factor-binding protein 2 (IBP-2) (IGF-binding protein 2) (IGFBP-2)	IGFBP2 BP2 IBP2	Homo sapiens (Human)	1
IBP3_HUMAN	IBP3_HUMAN	P17936	Insulin-like growth factor-binding protein 3 (IBP-3) (IGF-binding protein 3) (IGFBP-3)	IGFBP3 IBP3	Homo sapiens (Human)	1
IGHA2_HUMAN	IGHA2_HUMAN	P01877	Immunoglobulin heavy constant alpha 2 (Ig alpha-2 chain C region) (Ig alpha-2 chain C region BUT) (Ig alpha-2 chain C region LAN)	IGHA2	Homo sapiens (Human)	1
IGHG4_HUMAN	IGHG4_HUMAN	P01861	Immunoglobulin heavy constant gamma 4 (Ig gamma-4 chain C region)	IGHG4	Homo sapiens (Human)	1
K1C14_HUMAN	K1C14_HUMAN	P02533	Keratin, type I cytoskeletal 14 (Cytokeratin-14) (CK-14) (Keratin-14) (K14)	KRT14	Homo sapiens (Human)	1
K2C5_HUMAN	K2C5_HUMAN	P13647	Keratin, type II cytoskeletal 5 (58 kDa cytokeratin) (Cytokeratin-5) (CK-5) (Keratin-5) (K5) (Type-II keratin Kb5)	KRT5	Homo sapiens (Human)	1
K2C6A_HUMAN	K2C6A_HUMAN	P02538	Keratin, type II cytoskeletal 6A (Cytokeratin-6A) (CK-6A) (Cytokeratin-6D) (CK-6D) (Keratin-6A) (K6A) (Type-II keratin Kb6) (allergen Hom s 5)	KRT6A K6A KRT6D	Homo sapiens (Human)	1
MASP1_HUMAN	MASP1_HUMAN	P48740	Mannan-binding lectin serine protease 1 (EC 3.4.21.-) (Complement factor MASP-3) (Complement-activating component of Ra-reactive factor) (Mannose-binding lectin-associated serine protease 1) (MASP-1) (Mannose-binding protein-associated serine protease) (Ra-reactive factor serine protease p100) (RaRF) (Serine protease 5) [Cleaved into: Mannan-binding lectin serine protease 1 heavy chain; Mannan-bi…	MASP1 CRARF CRARF1 PRSS5	Homo sapiens (Human)	1
MDHC_BOVIN	MDHC_BOVIN	Q3T145	Malate dehydrogenase, cytoplasmic (EC 1.1.1.37) (Aromatic alpha-keto acid reductase) (KAR) (EC 1.1.1.96) (Cytosolic malate dehydrogenase)	MDH1	Bos taurus (Bovine)	1
MGAT3_HUMAN	MGAT3_HUMAN	Q09327	Beta-1,4-mannosyl-glycoprotein 4-beta-N-acetylglucosaminyltransferase (EC 2.4.1.144) (N-glycosyl-oligosaccharide-glycoprotein N-acetylglucosaminyltransferase III) (GNT-III) (GlcNAc-T III) (N-acetylglucosaminyltransferase III)	MGAT3 GGNT3	Homo sapiens (Human)	1
NP1L4_BOVIN	NP1L4_BOVIN	Q2TA40	Nucleosome assembly protein 1-like 4	NAP1L4	Bos taurus (Bovine)	1
OMD_BOVIN	OMD_BOVIN	O77742	Osteomodulin (Keratan sulfate proteoglycan osteomodulin) (KSPG osteomodulin) (Osteoadherin) (OSAD)	OMD	Bos taurus (Bovine)	1
PARVB_HUMAN	PARVB_HUMAN	Q9HBI1	Beta-parvin (Affixin)	PARVB CGI-56	Homo sapiens (Human)	1
PGRP1_BOVIN	PGRP1_BOVIN	Q8SPP7	Peptidoglycan recognition protein 1 (Oligosaccharide-binding protein) (OBP) (Peptidoglycan recognition protein short) (PGRP-S)	PGLYRP1 PGLYRP PGRP	Bos taurus (Bovine)	1
PIGR_HUMAN	PIGR_HUMAN	P01833	Polymeric immunoglobulin receptor (PIgR) (Poly-Ig receptor) (Hepatocellular carcinoma-associated protein TB6) [Cleaved into: Secretory component]	PIGR	Homo sapiens (Human)	1
PLEK_HUMAN	PLEK_HUMAN	P08567	Pleckstrin (Platelet 47 kDa protein) (p47)	PLEK P47	Homo sapiens (Human)	1
PPCE_BOVIN	PPCE_BOVIN	Q9XTA2	Prolyl endopeptidase (PE) (EC 3.4.21.26) (Post-proline cleaving enzyme)	PREP	Bos taurus (Bovine)	1
PS O-352	PS O-352	Phosphatidylserine 18:2/O-17:0				1
RAB10_HUMAN	RAB10_HUMAN	P61026	Ras-related protein Rab-10 (EC 3.6.5.2)	RAB10	Homo sapiens (Human)	1
SNED1_HUMAN	SNED1_HUMAN	Q8TER0	Sushi, nidogen and EGF-like domain-containing protein 1 (Insulin-responsive sequence DNA-binding protein 1) (IRE-BP1)	SNED1	Homo sapiens (Human)	1
TETN_HUMAN	TETN_HUMAN	P05452	Tetranectin (TN) (C-type lectin domain family 3 member B) (Plasminogen kringle 4-binding protein)	CLEC3B TNA	Homo sapiens (Human)	1
UBA1_BOVIN	UBA1_BOVIN	A3KMV5	Ubiquitin-like modifier-activating enzyme 1 (EC 6.2.1.45) (Ubiquitin-activating enzyme E1)	UBA1 UBE1	Bos taurus (Bovine)	1
WDR1_BOVIN	WDR1_BOVIN	Q2KJH4	WD repeat-containing protein 1	WDR1	Bos taurus (Bovine)	1
ZA2G_BOVIN	ZA2G_BOVIN	Q3ZCH5	Zinc-alpha-2-glycoprotein (Zn-alpha-2-GP) (Zn-alpha-2-glycoprotein)	AZGP1	Bos taurus (Bovine)	1
ZA2G_HUMAN	ZA2G_HUMAN	P25311	Zinc-alpha-2-glycoprotein (Zn-alpha-2-GP) (Zn-alpha-2-glycoprotein)	AZGP1 ZAG ZNGP1	Homo sapiens (Human)	1
A2AP_HUMAN	A2AP_HUMAN	P08697	Alpha-2-antiplasmin (Alpha-2-AP) (Alpha-2-plasmin inhibitor) (Alpha-2-PI) (Serpin F2)	SERPINF2 AAP PLI	Homo sapiens (Human)	2
ALBU_HUMAN	ALBU_HUMAN	P02768	Albumin	ALB GIG20 GIG42 PRO0903 PRO1708 PRO2044 PRO2619 PRO2675 UNQ696/PRO1341	Homo sapiens (Human)	2
APMAP_HUMAN	APMAP_HUMAN	Q9HDC9	Adipocyte plasma membrane-associated protein (Protein BSCv)	APMAP C20orf3 UNQ1869/PRO4305	Homo sapiens (Human)	2
APOA2_HUMAN	APOA2_HUMAN	P02652	Apolipoprotein A-II (Apo-AII) (ApoA-II) (Apolipoprotein A2) [Cleaved into: Proapolipoprotein A-II (ProapoA-II); Truncated apolipoprotein A-II (Apolipoprotein A-II(1-76))]	APOA2	Homo sapiens (Human)	2
APOH_HUMAN	APOH_HUMAN	P02749	Beta-2-glycoprotein 1 (APC inhibitor) (Activated protein C-binding protein) (Anticardiolipin cofactor) (Apolipoprotein H) (Apo-H) (Beta-2-glycoprotein I) (B2GPI) (Beta(2)GPI)	APOH B2G1	Homo sapiens (Human)	2
BHMT1_BOVIN	BHMT1_BOVIN	Q5I597	Betaine--homocysteine S-methyltransferase 1 (EC 2.1.1.5)	BHMT	Bos taurus (Bovine)	2
BPT2_BOVIN	BPT2_BOVIN	P04815	Spleen trypsin inhibitor I (SI-I) [Cleaved into: Spleen trypsin inhibitor II (SI-II); Spleen trypsin inhibitor III (SI-III)]		Bos taurus (Bovine)	2
C4BPA_HUMAN	C4BPA_HUMAN	P04003	C4b-binding protein alpha chain (C4bp) (Proline-rich protein) (PRP)	C4BPA C4BP	Homo sapiens (Human)	2
CAH1_HUMAN	CAH1_HUMAN	P00915	Carbonic anhydrase 1 (EC 4.2.1.1) (Carbonate dehydratase I) (Carbonic anhydrase B) (CAB) (Carbonic anhydrase I) (CA-I) (Cyanamide hydratase CA1) (EC 4.2.1.69)	CA1	Homo sapiens (Human)	2
CASA2_BOVIN	CASA2_BOVIN	P02663	Alpha-S2-casein [Cleaved into: Casocidin-1 (Casocidin-I)]	CSN1S2	Bos taurus (Bovine)	2
CBG_HUMAN	CBG_HUMAN	P08185	Corticosteroid-binding globulin (CBG) (Serpin A6) (Transcortin)	SERPINA6 CBG	Homo sapiens (Human)	2
CD14_HUMAN	CD14_HUMAN	P08571	Monocyte differentiation antigen CD14 (Myeloid cell-specific leucine-rich glycoprotein) (CD antigen CD14) [Cleaved into: Monocyte differentiation antigen CD14, urinary form; Monocyte differentiation antigen CD14, membrane-bound form]	CD14	Homo sapiens (Human)	2
CO4A_HUMAN	CO4A_HUMAN	P0C0L4	Complement C4-A (Acidic complement C4) (C3 and PZP-like alpha-2-macroglobulin domain-containing protein 2) [Cleaved into: Complement C4 beta chain; Complement C4-A alpha chain; C4a anaphylatoxin; C4b-A; C4d-A; Complement C4 gamma chain]	C4A CO4 CPAMD2	Homo sapiens (Human)	2
CO6_BOVIN	CO6_BOVIN	Q29RU4	Complement component C6	C6	Bos taurus (Bovine)	2
DOPD_BOVIN	DOPD_BOVIN	A5PK65	D-dopachrome decarboxylase (EC 4.1.1.84) (D-dopachrome tautomerase)	DDT	Bos taurus (Bovine)	2
FA10_HUMAN	FA10_HUMAN	P00742	Coagulation factor X (EC 3.4.21.6) (Stuart factor) (Stuart-Prower factor) [Cleaved into: Factor X light chain; Factor X heavy chain; Activated factor Xa heavy chain]	F10	Homo sapiens (Human)	2
FIBA_HUMAN	FIBA_HUMAN	P02671	Fibrinogen alpha chain [Cleaved into: Fibrinopeptide A; Fibrinogen alpha chain]	FGA	Homo sapiens (Human)	2
FILA2_HUMAN	FILA2_HUMAN	Q5D862	Filaggrin-2 (FLG-2) (Intermediate filament-associated and psoriasis-susceptibility protein) (Ifapsoriasin)	FLG2 IFPS	Homo sapiens (Human)	2
FLNA_HUMAN	FLNA_HUMAN	P21333	Filamin-A (FLN-A) (Actin-binding protein 280) (ABP-280) (Alpha-filamin) (Endothelial actin-binding protein) (Filamin-1) (Non-muscle filamin)	FLNA FLN FLN1	Homo sapiens (Human)	2
GNAS3_BOVIN	GNAS3_BOVIN	O18979	Neuroendocrine secretory protein 55 (NESP55) [Cleaved into: LSAL tetrapeptide; GAIPIRRH peptide]	GNAS GNAS1	Bos taurus (Bovine)	2
GSTM1_BOVIN	GSTM1_BOVIN	Q9N0V4	Glutathione S-transferase Mu 1 (EC 2.5.1.18) (GST class-mu 1) (GSTM1-1)	GSTM1 GSTM	Bos taurus (Bovine)	2
HEM2_BOVIN	HEM2_BOVIN	Q58DK5	Delta-aminolevulinic acid dehydratase (ALADH) (EC 4.2.1.24) (Porphobilinogen synthase)	ALAD	Bos taurus (Bovine)	2
HV338_HUMAN	HV338_HUMAN	A0A0C4DH36	Probable non-functional immunoglobulin heavy variable 3-38	IGHV3-38	Homo sapiens (Human)	2
IGHG1_HUMAN	IGHG1_HUMAN	P01857	Immunoglobulin heavy constant gamma 1 (Ig gamma-1 chain C region) (Ig gamma-1 chain C region EU) (Ig gamma-1 chain C region KOL) (Ig gamma-1 chain C region NIE)	IGHG1	Homo sapiens (Human)	2
IGHG2_HUMAN	IGHG2_HUMAN	P01859	Immunoglobulin heavy constant gamma 2 (Ig gamma-2 chain C region) (Ig gamma-2 chain C region DOT) (Ig gamma-2 chain C region TIL) (Ig gamma-2 chain C region ZIE)	IGHG2	Homo sapiens (Human)	2
IGHG3_HUMAN	IGHG3_HUMAN	P01860	Immunoglobulin heavy constant gamma 3 (HDC) (Heavy chain disease protein) (Ig gamma-3 chain C region)	IGHG3	Homo sapiens (Human)	2
ITB3_HUMAN	ITB3_HUMAN	P05106	Integrin beta-3 (Platelet membrane glycoprotein IIIa) (GPIIIa) (CD antigen CD61)	ITGB3 GP3A	Homo sapiens (Human)	2
ITIH2_HUMAN	ITIH2_HUMAN	P19823	Inter-alpha-trypsin inhibitor heavy chain H2 (ITI heavy chain H2) (ITI-HC2) (Inter-alpha-inhibitor heavy chain 2) (Inter-alpha-trypsin inhibitor complex component II) (Serum-derived hyaluronan-associated protein) (SHAP)	ITIH2 IGHEP2	Homo sapiens (Human)	2
ITIH4_HUMAN	ITIH4_HUMAN	Q14624	Inter-alpha-trypsin inhibitor heavy chain H4 (ITI heavy chain H4) (ITI-HC4) (Inter-alpha-inhibitor heavy chain 4) (Inter-alpha-trypsin inhibitor family heavy chain-related protein) (IHRP) (Plasma kallikrein sensitive glycoprotein 120) (Gp120) (PK-120) [Cleaved into: 70 kDa inter-alpha-trypsin inhibitor heavy chain H4; 35 kDa inter-alpha-trypsin inhibitor heavy chain H4]	ITIH4 IHRP ITIHL1 PK120 PRO1851	Homo sapiens (Human)	2
K1C10_HUMAN	K1C10_HUMAN	P13645	Keratin, type I cytoskeletal 10 (Cytokeratin-10) (CK-10) (Keratin-10) (K10)	KRT10 KPP	Homo sapiens (Human)	2
K1C13_HUMAN	K1C13_HUMAN	P13646	Keratin, type I cytoskeletal 13 (Cytokeratin-13) (CK-13) (Keratin-13) (K13)	KRT13	Homo sapiens (Human)	2
K1C9_HUMAN	K1C9_HUMAN	P35527	Keratin, type I cytoskeletal 9 (Cytokeratin-9) (CK-9) (Keratin-9) (K9)	KRT9	Homo sapiens (Human)	2
K2C7_HUMAN	K2C7_HUMAN	P08729	Keratin, type II cytoskeletal 7 (Cytokeratin-7) (CK-7) (Keratin-7) (K7) (Sarcolectin) (Type-II keratin Kb7)	KRT7 SCL	Homo sapiens (Human)	2
LCAT_HUMAN	LCAT_HUMAN	P04180	Phosphatidylcholine-sterol acyltransferase (EC 2.3.1.43) (1-alkyl-2-acetylglycerophosphocholine esterase) (EC 3.1.1.47) (Lecithin-cholesterol acyltransferase) (Phospholipid-cholesterol acyltransferase) (Platelet-activating factor acetylhydrolase) (PAF acetylhydrolase)	LCAT	Homo sapiens (Human)	2
LUM_HUMAN	LUM_HUMAN	P51884	Lumican (Keratan sulfate proteoglycan lumican) (KSPG lumican)	LUM LDC SLRR2D	Homo sapiens (Human)	2
LV151_HUMAN	LV151_HUMAN	P01701	Immunoglobulin lambda variable 1-51 (Ig lambda chain V-I region BL2) (Ig lambda chain V-I region EPS) (Ig lambda chain V-I region NEW) (Ig lambda chain V-I region NIG-64)	IGLV1-51	Homo sapiens (Human)	2
MIS_BOVIN	MIS_BOVIN	P03972	Muellerian-inhibiting factor (Anti-Muellerian hormone) (AMH) (Muellerian-inhibiting substance) (MIS)	AMH	Bos taurus (Bovine)	2
MOES_HUMAN	MOES_HUMAN	P26038	Moesin (Membrane-organizing extension spike protein)	MSN	Homo sapiens (Human)	2
MP2K1_HUMAN	MP2K1_HUMAN	Q02750	Dual specificity mitogen-activated protein kinase kinase 1 (MAP kinase kinase 1) (MAPKK 1) (MKK1) (EC 2.7.12.2) (ERK activator kinase 1) (MAPK/ERK kinase 1) (MEK 1)	MAP2K1 MEK1 PRKMK1	Homo sapiens (Human)	2
P4HA1_BOVIN	P4HA1_BOVIN	Q1RMU3	Prolyl 4-hydroxylase subunit alpha-1 (4-PH alpha-1) (EC 1.14.11.2) (Procollagen-proline,2-oxoglutarate-4-dioxygenase subunit alpha-1)	P4HA1	Bos taurus (Bovine)	2
PC160/182	PC160/182	Phosphatidylcholine 16:0/18:2				2
PE 383	PE 383	Phosphatidylethanolamine 38:3				2
PE 384	PE 384	Phosphatidylethanolamine 38:4				2
PLA1A_BOVIN	PLA1A_BOVIN	Q5E9H0	Phospholipase A1 member A (EC 3.1.1.111)	PLA1A	Bos taurus (Bovine)	2
QSOX1_HUMAN	QSOX1_HUMAN	O00391	Sulfhydryl oxidase 1 (hQSOX) (EC 1.8.3.2) (Quiescin Q6)	QSOX1 QSCN6 UNQ2520/PRO6013	Homo sapiens (Human)	2
REG1_BOVIN	REG1_BOVIN	P82943	Regakine-1		Bos taurus (Bovine)	2
RHOG_HUMAN	RHOG_HUMAN	P84095	Rho-related GTP-binding protein RhoG	RHOG ARHG	Homo sapiens (Human)	2
S10A4_HUMAN	S10A4_HUMAN	P26447	Protein S100-A4 (Calvasculin) (Metastasin) (Placental calcium-binding protein) (Protein Mts1) (S100 calcium-binding protein A4)	S100A4 CAPL MTS1	Homo sapiens (Human)	2
SAA4_HUMAN	SAA4_HUMAN	P35542	Serum amyloid A-4 protein (Constitutively expressed serum amyloid A protein) (C-SAA)	SAA4 CSAA	Homo sapiens (Human)	2
SERPH_BOVIN	SERPH_BOVIN	Q2KJH6	Serpin H1 (Collagen-binding protein) (Colligin)	SERPINH1	Bos taurus (Bovine)	2
SGTA_BOVIN	SGTA_BOVIN	Q32LM2	Small glutamine-rich tetratricopeptide repeat-containing protein alpha (Alpha-SGT)	SGTA	Bos taurus (Bovine)	2
SORCN_HUMAN	SORCN_HUMAN	P30626	Sorcin (22 kDa protein) (CP-22) (CP22) (V19)	SRI	Homo sapiens (Human)	2
SYNC_BOVIN	SYNC_BOVIN	Q2KJG3	Asparagine--tRNA ligase, cytoplasmic (EC 6.1.1.22) (Asparaginyl-tRNA synthetase) (AsnRS)	NARS	Bos taurus (Bovine)	2
AOC3_BOVIN	AOC3_BOVIN	Q9TTK6	Membrane primary amine oxidase (EC 1.4.3.21) (Copper amine oxidase) (Semicarbazide-sensitive amine oxidase) (SSAO) (Vascular adhesion protein 1) (VAP-1)	AOC3	Bos taurus (Bovine)	3
APOA1_HUMAN	APOA1_HUMAN	P02647	Apolipoprotein A-I (Apo-AI) (ApoA-I) (Apolipoprotein A1) [Cleaved into: Proapolipoprotein A-I (ProapoA-I); Truncated apolipoprotein A-I (Apolipoprotein A-I(1-242))]	APOA1	Homo sapiens (Human)	3
APOB_HUMAN	APOB_HUMAN	P04114	Apolipoprotein B-100 (Apo B-100) [Cleaved into: Apolipoprotein B-48 (Apo B-48)]	APOB	Homo sapiens (Human)	3
APOF_HUMAN	APOF_HUMAN	Q13790	Apolipoprotein F (Apo-F) (Lipid transfer inhibitor protein) (LTIP)	APOF	Homo sapiens (Human)	3
HBA_HUMAN	HBA_HUMAN	P69905	Hemoglobin subunit alpha (Alpha-globin) (Hemoglobin alpha chain) [Cleaved into: Hemopressin]	HBA1; HBA2	Homo sapiens (Human)	3
KPYM_HUMAN	KPYM_HUMAN	P14618	Pyruvate kinase PKM (EC 2.7.1.40) (Cytosolic thyroid hormone-binding protein) (CTHBP) (Opa-interacting protein 3) (OIP-3) (Pyruvate kinase 2/3) (Pyruvate kinase muscle isozyme) (Threonine-protein kinase PKM2) (EC 2.7.11.1) (Thyroid hormone-binding protein 1) (THBP1) (Tumor M2-PK) (Tyrosine-protein kinase PKM2) (EC 2.7.10.2) (p58)	PKM OIP3 PK2 PK3 PKM2	Homo sapiens (Human)	3
MYG_BOVIN	MYG_BOVIN	P02192	Myoglobin	MB	Bos taurus (Bovine)	3
NHRF1_BOVIN	NHRF1_BOVIN	Q3SZK8	Na(+)/H(+) exchange regulatory cofactor NHE-RF1 (NHERF-1) (Ezrin-radixin-moesin-binding phosphoprotein 50) (EBP50) (Regulatory cofactor of Na(+)/H(+) exchanger) (Sodium-hydrogen exchanger regulatory factor 1) (Solute carrier family 9 isoform A3 regulatory factor 1)	NHERF1 NHERF SLC9A3R1	Bos taurus (Bovine)	3
PAFA_BOVIN	PAFA_BOVIN	Q28017	Platelet-activating factor acetylhydrolase (PAF acetylhydrolase) (EC 3.1.1.47) (1-alkyl-2-acetylglycerophosphocholine esterase) (2-acetyl-1-alkylglycerophosphocholine esterase) (LDL-associated phospholipase A2) (LDL-PLA(2)) (PAF 2-acylhydrolase)	PLA2G7	Bos taurus (Bovine)	3
PC180/204	PC180/204	Phosphatidylcholine 18:0/20:4				3
PRDX5_BOVIN	PRDX5_BOVIN	Q9BGI1	Peroxiredoxin-5, mitochondrial (EC 1.11.1.24) (Peroxiredoxin V) (Prx-V) (Thioredoxin peroxidase) (Thioredoxin-dependent peroxiredoxin 5)	PRDX5	Bos taurus (Bovine)	3
VTDB_HUMAN	VTDB_HUMAN	P02774	Vitamin D-binding protein (DBP) (VDB) (Gc protein-derived macrophage activating factor) (Gc-MAF) (GcMAF) (Gc-globulin) (Group-specific component) (Gc) (Vitamin D-binding protein-macrophage activating factor) (DBP-maf)	GC	Homo sapiens (Human)	3
ZPI_HUMAN	ZPI_HUMAN	Q9UK55	Protein Z-dependent protease inhibitor (PZ-dependent protease inhibitor) (PZI) (Serpin A10)	SERPINA10 ZPI UNQ707/PRO1358	Homo sapiens (Human)	3
CD9_BOVIN	CD9_BOVIN	P30932	CD9 antigen (CD antigen CD9)	CD9	Bos taurus (Bovine)	4
CTHL4_BOVIN	CTHL4_BOVIN	P33046	Cathelicidin-4 (Indolicidin)	CATHL4	Bos taurus (Bovine)	4
DCXR_BOVIN	DCXR_BOVIN	Q1JP75	L-xylulose reductase (XR) (EC 1.1.1.10) (Dicarbonyl/L-xylulose reductase)	DCXR	Bos taurus (Bovine)	4
FETUA_HUMAN	FETUA_HUMAN	P02765	Alpha-2-HS-glycoprotein (Alpha-2-Z-globulin) (Ba-alpha-2-glycoprotein) (Fetuin-A) [Cleaved into: Alpha-2-HS-glycoprotein chain A; Alpha-2-HS-glycoprotein chain B]	AHSG FETUA PRO2743	Homo sapiens (Human)	4
PC180/182	PC180/182	Phosphatidylcholine 18:0/18:2				4
TG 568 TG182/204/182	TG 568 TG182/204/182	Triacylglycerol 18:2/20:4/18:2				4
TRFL_BOVIN	TRFL_BOVIN	P24627	Lactotransferrin (Lactoferrin) (EC 3.4.21.-) [Cleaved into: Lactoferricin-B (Lfcin-B)]	LTF	Bos taurus (Bovine)	4

## Sheet: GO association networks
Feature ID	Label	Entry	Protein names	Gene Names	Organism	Cluster
CDC37_BOVIN	CDC37_BOVIN	Q5EAC6	Hsp90 co-chaperone Cdc37 (Hsp90 chaperone protein kinase-targeting subunit) (p50Cdc37) [Cleaved into: Hsp90 co-chaperone Cdc37, N-terminally processed]	CDC37	Bos taurus (Bovine)	1
ANXA5_HUMAN	ANXA5_HUMAN	P08758	Annexin A5 (Anchorin CII) (Annexin V) (Annexin-5) (Calphobindin I) (CPB-I) (Endonexin II) (Lipocortin V) (Placental anticoagulant protein 4) (PP4) (Placental anticoagulant protein I) (PAP-I) (Thromboplastin inhibitor) (Vascular anticoagulant-alpha) (VAC-alpha)	ANXA5 ANX5 ENX2 PP4	Homo sapiens (Human)	1
PA2GA_HUMAN	PA2GA_HUMAN	P14555	Phospholipase A2, membrane associated (EC 3.1.1.4) (GIIC sPLA2) (Group IIA phospholipase A2) (Non-pancreatic secretory phospholipase A2) (NPS-PLA2) (Phosphatidylcholine 2-acylhydrolase 2A)	PLA2G2A PLA2B PLA2L RASF-A	Homo sapiens (Human)	1
CD9_BOVIN	CD9_BOVIN	P30932	CD9 antigen (CD antigen CD9)	CD9	Bos taurus (Bovine)	1
B3AT_HUMAN	B3AT_HUMAN	P02730	Band 3 anion transport protein (Anion exchange protein 1) (AE 1) (Anion exchanger 1) (Solute carrier family 4 member 1) (CD antigen CD233)	SLC4A1 AE1 DI EPB3	Homo sapiens (Human)	1
STOM_HUMAN	STOM_HUMAN	P27105	Stomatin (Erythrocyte band 7 integral membrane protein) (Erythrocyte membrane protein band 7.2) (Protein 7.2b)	STOM BND7 EPB72	Homo sapiens (Human)	1
APOA4_BOVIN	APOA4_BOVIN	Q32PJ2	Apolipoprotein A-IV (Apo-AIV) (ApoA-IV) (Apolipoprotein A4)	APOA4	Bos taurus (Bovine)	1
FA11_HUMAN	FA11_HUMAN	P03951	Coagulation factor XI (FXI) (EC 3.4.21.27) (Plasma thromboplastin antecedent) (PTA) [Cleaved into: Coagulation factor XIa heavy chain; Coagulation factor XIa light chain]	F11	Homo sapiens (Human)	1
PC160/181	PC160/181	Phosphatidylcholine 16:0/18:1				1
CASPE_HUMAN	CASPE_HUMAN	P31944	Caspase-14 (CASP-14) (EC 3.4.22.-) [Cleaved into: Caspase-14 subunit p17, mature form; Caspase-14 subunit p10, mature form; Caspase-14 subunit p20, intermediate form; Caspase-14 subunit p8, intermediate form]	CASP14	Homo sapiens (Human)	2
MBP_HUMAN	MBP_HUMAN	P02686	Myelin basic protein (MBP) (Myelin A1 protein) (Myelin membrane encephalitogenic protein)	MBP	Homo sapiens (Human)	2
GPX3_HUMAN	GPX3_HUMAN	P22352	Glutathione peroxidase 3 (GPx-3) (GSHPx-3) (EC 1.11.1.9) (Extracellular glutathione peroxidase) (Plasma glutathione peroxidase) (GPx-P) (GSHPx-P)	GPX3 GPXP	Homo sapiens (Human)	2
IBP2_HUMAN	IBP2_HUMAN	P18065	Insulin-like growth factor-binding protein 2 (IBP-2) (IGF-binding protein 2) (IGFBP-2)	IGFBP2 BP2 IBP2	Homo sapiens (Human)	2
CO6_HUMAN	CO6_HUMAN	P13671	Complement component C6	C6	Homo sapiens (Human)	2
SIAT1_HUMAN	SIAT1_HUMAN	P15907	Beta-galactoside alpha-2,6-sialyltransferase 1 (Alpha 2,6-ST 1) (EC 2.4.3.1) (B-cell antigen CD75) (CMP-N-acetylneuraminate-beta-galactosamide-alpha-2,6-sialyltransferase 1) (ST6Gal I) (ST6GalI) (Sialyltransferase 1)	ST6GAL1 SIAT1	Homo sapiens (Human)	2
FHR5_HUMAN	FHR5_HUMAN	Q9BXR6	Complement factor H-related protein 5 (FHR-5)	CFHR5 CFHL5 FHR5	Homo sapiens (Human)	2
S10A8_HUMAN	S10A8_HUMAN	P05109	Protein S100-A8 (Calgranulin-A) (Calprotectin L1L subunit) (Cystic fibrosis antigen) (CFAG) (Leukocyte L1 complex light chain) (Migration inhibitory factor-related protein 8) (MRP-8) (p8) (S100 calcium-binding protein A8) (Urinary stone protein band A)	S100A8 CAGA CFAG MRP8	Homo sapiens (Human)	2
PEDF_HUMAN	PEDF_HUMAN	P36955	Pigment epithelium-derived factor (PEDF) (Cell proliferation-inducing gene 35 protein) (EPC-1) (Serpin F1)	SERPINF1 PEDF PIG35	Homo sapiens (Human)	2
CAN2_HUMAN	CAN2_HUMAN	P17655	Calpain-2 catalytic subunit (EC 3.4.22.53) (Calcium-activated neutral proteinase 2) (CANP 2) (Calpain M-type) (Calpain large polypeptide L2) (Calpain-2 large subunit) (Millimolar-calpain) (M-calpain)	CAPN2 CANPL2	Homo sapiens (Human)	2
CATG_HUMAN	CATG_HUMAN	P08311	Cathepsin G (CG) (EC 3.4.21.20) [Cleaved into: Cathepsin G, C-terminal truncated form]	CTSG	Homo sapiens (Human)	2
ANTR1_HUMAN	ANTR1_HUMAN	Q9H6X2	Anthrax toxin receptor 1 (Tumor endothelial marker 8)	ANTXR1 ATR TEM8	Homo sapiens (Human)	2
APOA5_HUMAN	APOA5_HUMAN	Q6Q788	Apolipoprotein A-V (Apo-AV) (ApoA-V) (Apolipoprotein A5) (Regeneration-associated protein 3)	APOA5 RAP3 UNQ411/PRO773	Homo sapiens (Human)	2
CFAD_HUMAN	CFAD_HUMAN	P00746	Complement factor D (EC 3.4.21.46) (Adipsin) (C3 convertase activator) (Properdin factor D)	CFD DF PFD	Homo sapiens (Human)	2
ZPI_HUMAN	ZPI_HUMAN	Q9UK55	Protein Z-dependent protease inhibitor (PZ-dependent protease inhibitor) (PZI) (Serpin A10)	SERPINA10 ZPI UNQ707/PRO1358	Homo sapiens (Human)	2
CATS_HUMAN	CATS_HUMAN	P25774	Cathepsin S (EC 3.4.22.27)	CTSS	Homo sapiens (Human)	2
CAN1_HUMAN	CAN1_HUMAN	P07384	Calpain-1 catalytic subunit (EC 3.4.22.52) (Calcium-activated neutral proteinase 1) (CANP 1) (Calpain mu-type) (Calpain-1 large subunit) (Cell proliferation-inducing gene 30 protein) (Micromolar-calpain) (muCANP)	CAPN1 CANPL1 PIG30	Homo sapiens (Human)	2
KAIN_HUMAN	KAIN_HUMAN	P29622	Kallistatin (Kallikrein inhibitor) (Peptidase inhibitor 4) (PI-4) (Serpin A4)	SERPINA4 KST PI4	Homo sapiens (Human)	2
PRG4_HUMAN	PRG4_HUMAN	Q92954	Proteoglycan 4 (Lubricin) (Megakaryocyte-stimulating factor) (Superficial zone proteoglycan) [Cleaved into: Proteoglycan 4 C-terminal part]	PRG4 MSF SZP	Homo sapiens (Human)	2
SAMP_HUMAN	SAMP_HUMAN	P02743	Serum amyloid P-component (SAP) (9.5S alpha-1-glycoprotein) [Cleaved into: Serum amyloid P-component(1-203)]	APCS PTX2	Homo sapiens (Human)	2
APOL1_HUMAN	APOL1_HUMAN	O14791	Apolipoprotein L1 (Apolipoprotein L) (Apo-L) (ApoL) (Apolipoprotein L-I) (ApoL-I)	APOL1 APOL	Homo sapiens (Human)	2
HV307_HUMAN	HV307_HUMAN	P01780	Immunoglobulin heavy variable 3-7 (Ig heavy chain V-III region GAL) (Ig heavy chain V-III region GAR) (Ig heavy chain V-III region JON)	IGHV3-7	Homo sapiens (Human)	2
CLUS_HUMAN	CLUS_HUMAN	P10909	Clusterin (Aging-associated gene 4 protein) (Apolipoprotein J) (Apo-J) (Complement cytolysis inhibitor) (CLI) (Complement-associated protein SP-40,40) (Ku70-binding protein 1) (NA1/NA2) (Sulfated glycoprotein 2) (SGP-2) (Testosterone-repressed prostate message 2) (TRPM-2) [Cleaved into: Clusterin beta chain (ApoJalpha) (Complement cytolysis inhibitor a chain) (SP-40,40 beta-chain); Clusterin alph…	CLU APOJ CLI KUB1 AAG4	Homo sapiens (Human)	2
CBPN_HUMAN	CBPN_HUMAN	P15169	Carboxypeptidase N catalytic chain (CPN) (EC 3.4.17.3) (Anaphylatoxin inactivator) (Arginine carboxypeptidase) (Carboxypeptidase N polypeptide 1) (Carboxypeptidase N small subunit) (Kininase-1) (Lysine carboxypeptidase) (Plasma carboxypeptidase B) (Serum carboxypeptidase N) (SCPN)	CPN1 ACBP	Homo sapiens (Human)	2
ANT3_HUMAN	ANT3_HUMAN	P01008	Antithrombin-III (ATIII) (Serpin C1)	SERPINC1 AT3 PRO0309	Homo sapiens (Human)	2
A2AP_HUMAN	A2AP_HUMAN	P08697	Alpha-2-antiplasmin (Alpha-2-AP) (Alpha-2-plasmin inhibitor) (Alpha-2-PI) (Serpin F2)	SERPINF2 AAP PLI	Homo sapiens (Human)	2
CXCL7_HUMAN	CXCL7_HUMAN	P02775	Platelet basic protein (PBP) (C-X-C motif chemokine 7) (Leukocyte-derived growth factor) (LDGF) (Macrophage-derived growth factor) (MDGF) (Small-inducible cytokine B7) [Cleaved into: Connective tissue-activating peptide III (CTAP-III) (LA-PF4) (Low-affinity platelet factor IV); TC-2; Connective tissue-activating peptide III(1-81) (CTAP-III(1-81)); Beta-thromboglobulin (Beta-TG); Neutrophil-activa…	PPBP CTAP3 CXCL7 SCYB7 TGB1 THBGB1	Homo sapiens (Human)	2
IGJ_HUMAN	IGJ_HUMAN	P01591	Immunoglobulin J chain (Joining chain of multimeric IgA and IgM)	JCHAIN IGCJ IGJ	Homo sapiens (Human)	2
APOD_HUMAN	APOD_HUMAN	P05090	Apolipoprotein D (Apo-D) (ApoD)	APOD	Homo sapiens (Human)	2
FA5_HUMAN	FA5_HUMAN	P12259	Coagulation factor V (Activated protein C cofactor) (Proaccelerin, labile factor) [Cleaved into: Coagulation factor V heavy chain; Coagulation factor V light chain]	F5	Homo sapiens (Human)	2
FCN1_HUMAN	FCN1_HUMAN	O00602	Ficolin-1 (Collagen/fibrinogen domain-containing protein 1) (Ficolin-A) (Ficolin-alpha) (M-ficolin)	FCN1 FCNM	Homo sapiens (Human)	2
MGP_HUMAN	MGP_HUMAN	P08493	Matrix Gla protein (MGP) (Cell growth-inhibiting gene 36 protein)	MGP MGLAP GIG36	Homo sapiens (Human)	2
IC1_HUMAN	IC1_HUMAN	P05155	Plasma protease C1 inhibitor (C1 Inh) (C1Inh) (C1 esterase inhibitor) (C1-inhibiting factor) (Serpin G1)	SERPING1 C1IN C1NH	Homo sapiens (Human)	2
FIBG_HUMAN	FIBG_HUMAN	P02679	Fibrinogen gamma chain	FGG PRO2061	Homo sapiens (Human)	2
SEPP1_HUMAN	SEPP1_HUMAN	P49908	Selenoprotein P (SeP)	SELENOP SELP SEPP1	Homo sapiens (Human)	2
CADH1_HUMAN	CADH1_HUMAN	P12830	Cadherin-1 (CAM 120/80) (Epithelial cadherin) (E-cadherin) (Uvomorulin) (CD antigen CD324) [Cleaved into: E-Cad/CTF1; E-Cad/CTF2; E-Cad/CTF3]	CDH1 CDHE UVO	Homo sapiens (Human)	2
LYSC_HUMAN	LYSC_HUMAN	P61626	Lysozyme C (EC 3.2.1.17) (1,4-beta-N-acetylmuramidase C)	LYZ LZM	Homo sapiens (Human)	2
APOA2_HUMAN	APOA2_HUMAN	P02652	Apolipoprotein A-II (Apo-AII) (ApoA-II) (Apolipoprotein A2) [Cleaved into: Proapolipoprotein A-II (ProapoA-II); Truncated apolipoprotein A-II (Apolipoprotein A-II(1-76))]	APOA2	Homo sapiens (Human)	2
IBP3_HUMAN	IBP3_HUMAN	P17936	Insulin-like growth factor-binding protein 3 (IBP-3) (IGF-binding protein 3) (IGFBP-3)	IGFBP3 IBP3	Homo sapiens (Human)	2
KLKB1_HUMAN	KLKB1_HUMAN	P03952	Plasma kallikrein (EC 3.4.21.34) (Fletcher factor) (Kininogenin) (Plasma prekallikrein) (PKK) [Cleaved into: Plasma kallikrein heavy chain; Plasma kallikrein light chain]	KLKB1 KLK3	Homo sapiens (Human)	2
APOC4_HUMAN	APOC4_HUMAN	P55056	Apolipoprotein C-IV (Apo-CIV) (ApoC-IV) (Apolipoprotein C4)	APOC4	Homo sapiens (Human)	2
FIBB_HUMAN	FIBB_HUMAN	P02675	Fibrinogen beta chain [Cleaved into: Fibrinopeptide B; Fibrinogen beta chain]	FGB	Homo sapiens (Human)	2
IGHM_HUMAN	IGHM_HUMAN	P01871	Immunoglobulin heavy constant mu (Ig mu chain C region) (Ig mu chain C region BOT) (Ig mu chain C region GAL) (Ig mu chain C region OU)	IGHM	Homo sapiens (Human)	2
TTHY_BOVIN	TTHY_BOVIN	O46375	Transthyretin (Prealbumin)	TTR	Bos taurus (Bovine)	2
ITIH4_HUMAN	ITIH4_HUMAN	Q14624	Inter-alpha-trypsin inhibitor heavy chain H4 (ITI heavy chain H4) (ITI-HC4) (Inter-alpha-inhibitor heavy chain 4) (Inter-alpha-trypsin inhibitor family heavy chain-related protein) (IHRP) (Plasma kallikrein sensitive glycoprotein 120) (Gp120) (PK-120) [Cleaved into: 70 kDa inter-alpha-trypsin inhibitor heavy chain H4; 35 kDa inter-alpha-trypsin inhibitor heavy chain H4]	ITIH4 IHRP ITIHL1 PK120 PRO1851	Homo sapiens (Human)	2
APOE_HUMAN	APOE_HUMAN	P02649	Apolipoprotein E (Apo-E)	APOE	Homo sapiens (Human)	2
PC180/204	PC180/204	Phosphatidylcholine 18:0/20:4				2
PC180/182	PC180/182	Phosphatidylcholine 18:0/18:2				2
PC160/182	PC160/182	Phosphatidylcholine 16:0/18:2				2
PE 384	PE 384	Phosphatidylethanolamine 38:4				2
PS 371	PS 371	Phosphatidylserine 37:1				2
PC182/204	PC182/204	Phosphatidylcholine 18:2/20:4				2
PE 383	PE 383	Phosphatidylethanolamine 38:3				2
PI 384	PI 384	Phosphatidylinositol 28:4				2
PS O-382	PS O-382	Phosphatidylserine O-18:0/20:2				2
PC160/180	PC160/180	Phosphatidylcholine 16:0/18:0				2
