# Supplementary material for: Sources of biases in the in vitro testing of nanomaterials: the role of the biomolecular corona
Source: Royal Society of Chemistry journal article supplement (doi:10.1039/d3nh00510k), 2024-01-01
Supplement: d3nh00510k6.xlsx [file d3nh00510k6.xlsx]

## Sheet: GO
Entity	Type	Entry	Entry Name	Protein names	Gene Names	Organism	Length
A1AT_BOVIN	Protein	P34955	A1AT_BOVIN	Alpha-1-antiproteinase (Alpha-1-antitrypsin) (Alpha-1-proteinase inhibitor) (Serpin A1)	SERPINA1 PI	Bos taurus (Bovine)	416
A1AG_BOVIN	Protein	Q3SZR3	A1AG_BOVIN	Alpha-1-acid glycoprotein (Orosomucoid) (OMD)	ORM1 AGP	Bos taurus (Bovine)	202
ANGT_BOVIN	Protein	P01017	ANGT_BOVIN	Angiotensinogen (Serpin A8) [Cleaved into: Angiotensin-1 (Angiotensin 1-10) (Angiotensin I) (Ang I); Angiotensin-2 (Angiotensin 1-8) (Angiotensin II) (Ang II); Angiotensin-3 (Angiotensin 2-8) (Angiotensin III) (Ang III) (Des-Asp[1]-angiotensin II); Angiotensin-4 (Angiotensin 3-8) (Angiotensin IV) (Ang IV); Angiotensin 1-9; Angiotensin 1-7; Angiotensin 1-5; Angiotensin 1-4]	AGT SERPINA8	Bos taurus (Bovine)	476
CFAB_BOVIN	Protein	P81187	CFAB_BOVIN	Complement factor B (EC 3.4.21.47) (C3/C5 convertase) (EC-VMFB) [Cleaved into: Complement factor B Ba fragment; Complement factor B Bb fragment]	CFB BF	Bos taurus (Bovine)	761
A2AP_BOVIN	Protein	P28800	A2AP_BOVIN	Alpha-2-antiplasmin (Alpha-2-AP) (Alpha-2-plasmin inhibitor) (Alpha-2-PI) (Serpin F2)	SERPINF2 PLI	Bos taurus (Bovine)	492
IBP3_BOVIN	Protein	P20959	IBP3_BOVIN	Insulin-like growth factor-binding protein 3 (IBP-3) (IGF-binding protein 3) (IGFBP-3)	IGFBP3	Bos taurus (Bovine)	291
TTHY_BOVIN	Protein	O46375	TTHY_BOVIN	Transthyretin (Prealbumin)	TTR	Bos taurus (Bovine)	147
CBPN_BOVIN	Protein	Q2KJ83	CBPN_BOVIN	Carboxypeptidase N catalytic chain (CPN) (EC 3.4.17.3) (Carboxypeptidase N polypeptide 1) (Carboxypeptidase N small subunit)	CPN1	Bos taurus (Bovine)	462
ITIH3_BOVIN	Protein	P56652	ITIH3_BOVIN	Inter-alpha-trypsin inhibitor heavy chain H3 (ITI heavy chain H3) (ITI-HC3) (Inter-alpha-inhibitor heavy chain 3)	ITIH3	Bos taurus (Bovine)	891
FABPL_BOVIN	Protein	P80425	FABPL_BOVIN	Fatty acid-binding protein, liver (Fatty acid-binding protein 1) (Liver-type fatty acid-binding protein) (L-FABP)	FABP1	Bos taurus (Bovine)	127
IBP6_BOVIN	Protein	Q05718	IBP6_BOVIN	Insulin-like growth factor-binding protein 6 (IBP-6) (IGF-binding protein 6) (IGFBP-6)	IGFBP6	Bos taurus (Bovine)	237
LUM_BOVIN	Protein	Q05443	LUM_BOVIN	Lumican (Corneal keratan sulfate proteoglycan 37B core protein) (Keratan sulfate proteoglycan) (KSPG)	LUM LDC	Bos taurus (Bovine)	342
SPP24_BOVIN	Protein	Q27967	SPP24_BOVIN	Secreted phosphoprotein 24 (Spp-24) (Secreted phosphoprotein 2)	SPP2 SPP24	Bos taurus (Bovine)	203
VWF_BOVIN	Protein	P80012	VWF_BOVIN	von Willebrand factor (vWF)	VWF F8VWF	Bos taurus (Bovine)	937
CHIA_BOVIN	Protein	Q95M17	CHIA_BOVIN	Acidic mammalian chitinase (AMCase) (EC 3.2.1.14) (Chitin-binding protein b04) (CBPb04)	CHIA	Bos taurus (Bovine)	472
KNG2_BOVIN	Protein	P01045	KNG2_BOVIN	Kininogen-2 (Kininogen II) (Thiol proteinase inhibitor) [Cleaved into: Kininogen-2 heavy chain; Bradykinin (Kallidin I); Lysyl-bradykinin (Kallidin II); Kininogen-2 light chain]	KNG2	Bos taurus (Bovine)	619
LECT2_BOVIN	Protein	O62644	LECT2_BOVIN	Leukocyte cell-derived chemotaxin-2 (LECT-2) (bLECT2) (Chondromodulin II) (ChM-II) (bChM-II)	LECT2	Bos taurus (Bovine)	151
CL43_BOVIN	Protein	P42916	CL43_BOVIN	Collectin-43 (CL-43) (43 kDa collectin)	CL43	Bos taurus (Bovine)	321
PTGR1_BOVIN	Protein	Q3SZJ4	PTGR1_BOVIN	Prostaglandin reductase 1 (PRG-1) (15-oxoprostaglandin 13-reductase) (EC 1.3.1.48) (Dithiolethione-inducible gene 1 protein) (D3T-inducible gene 1 protein) (DIG-1) (Leukotriene B4 12-hydroxydehydrogenase) (NAD(P)H-dependent alkenal/one oxidoreductase) (EC 1.3.1.74)	PTGR1 LTB4DH	Bos taurus (Bovine)	329
OSTP_BOVIN	Protein	P31096	OSTP_BOVIN	Osteopontin (Bone sialoprotein 1) (Secreted phosphoprotein 1) (SPP-1)	SPP1 OPN	Bos taurus (Bovine)	278
OMD_BOVIN	Protein	O77742	OMD_BOVIN	Osteomodulin (Keratan sulfate proteoglycan osteomodulin) (KSPG osteomodulin) (Osteoadherin) (OSAD)	OMD	Bos taurus (Bovine)	422
DPYL2_BOVIN	Protein	O02675	DPYL2_BOVIN	Dihydropyrimidinase-related protein 2 (DRP-2) (Neural-specific protein NSP60)	DPYSL2	Bos taurus (Bovine)	572
CATA_BOVIN	Protein	P00432	CATA_BOVIN	Catalase (EC 1.11.1.6)	CAT	Bos taurus (Bovine)	527
CASP6_BOVIN	Protein	Q3T0P5	CASP6_BOVIN	Caspase-6 (CASP-6) (EC 3.4.22.59) [Cleaved into: Caspase-6 subunit p18; Caspase-6 subunit p11]	CASP6	Bos taurus (Bovine)	293
SAMP_BOVIN	Protein	Q3T004	SAMP_BOVIN	Serum amyloid P-component (SAP)	APCS	Bos taurus (Bovine)	224
MA2B1_BOVIN	Protein	Q29451	MA2B1_BOVIN	Lysosomal alpha-mannosidase (Laman) (EC 3.2.1.24) (Lysosomal acid alpha-mannosidase) (Mannosidase alpha class 2B member 1) (Mannosidase alpha-B) [Cleaved into: Lysosomal alpha-mannosidase A peptide; Lysosomal alpha-mannosidase B peptide; Lysosomal alpha-mannosidase C peptide; Lysosomal alpha-mannosidase D peptide; Lysosomal alpha-mannosidase E peptide]	MAN2B1 MANB	Bos taurus (Bovine)	999
GDIR1_BOVIN	Protein	P19803	GDIR1_BOVIN	Rho GDP-dissociation inhibitor 1 (Rho GDI 1) (Rho-GDI alpha)	ARHGDIA	Bos taurus (Bovine)	204
MMP2_BOVIN	Protein	Q9GLE5	MMP2_BOVIN	72 kDa type IV collagenase (EC 3.4.24.24) (72 kDa gelatinase) (Matrix metalloproteinase-2) (MMP-2) [Cleaved into: PEX]	MMP2	Bos taurus (Bovine)	661
KRT83_BOVIN	Protein	A4FUZ0	KRT83_BOVIN	Keratin, type II cuticular Hb3 (Keratin-83) (K83) (Type II hair keratin Hb3) (Type-II keratin Kb23)	KRT83	Bos taurus (Bovine)	493
MYOC_BOVIN	Protein	Q9XTA3	MYOC_BOVIN	Myocilin (Myocilin 55 kDa subunit) (Trabecular meshwork-induced glucocorticoid response protein) [Cleaved into: Myocilin, N-terminal fragment (Myocilin 20 kDa N-terminal fragment); Myocilin, C-terminal fragment (Myocilin 35 kDa N-terminal fragment)]	MYOC TIGR	Bos taurus (Bovine)	490
TGFI1_BOVIN	Protein	Q3MHZ4	TGFI1_BOVIN	Transforming growth factor beta-1-induced transcript 1 protein (Hydrogen peroxide-inducible clone 5 protein) (Hic-5)	TGFB1I1	Bos taurus (Bovine)	456
MTND_BOVIN	Protein	Q3ZBL1	MTND_BOVIN	Acireductone dioxygenase (Acireductone dioxygenase (Fe(2+)-requiring)) (ARD') (Fe-ARD) (EC 1.13.11.54) (Acireductone dioxygenase (Ni(2+)-requiring)) (ARD) (Ni-ARD) (EC 1.13.11.53) (Membrane-type 1 matrix metalloproteinase cytoplasmic tail-binding protein 1) (MTCBP-1)	ADI1 MTCBP1	Bos taurus (Bovine)	179
SBSN_BOVIN	Protein	A6QQF6	SBSN_BOVIN	Suprabasin	SBSN	Bos taurus (Bovine)	557
CALD1_BOVIN	Protein	Q27976	CALD1_BOVIN	Non-muscle caldesmon (CDM) (L-caldesmon)	CALD1	Bos taurus (Bovine)	83
VIME_BOVIN	Protein	P48616	VIME_BOVIN	Vimentin	VIM	Bos taurus (Bovine)	466
SYRC_BOVIN	Protein	A7YW98	SYRC_BOVIN	Arginine--tRNA ligase, cytoplasmic (EC 6.1.1.19) (Arginyl-tRNA synthetase) (ArgRS)	RARS1 RARS	Bos taurus (Bovine)	660
TAGL2_BOVIN	Protein	Q5E9F5	TAGL2_BOVIN	Transgelin-2	TAGLN2	Bos taurus (Bovine)	199
EF1G_BOVIN	Protein	Q3SZV3	EF1G_BOVIN	Elongation factor 1-gamma (EF-1-gamma) (eEF-1B gamma)	EEF1G	Bos taurus (Bovine)	440
COTL1_BOVIN	Protein	Q2HJ57	COTL1_BOVIN	Coactosin-like protein	COTL1	Bos taurus (Bovine)	142
MTNA_BOVIN	Protein	Q2NL31	MTNA_BOVIN	Methylthioribose-1-phosphate isomerase (M1Pi) (MTR-1-P isomerase) (EC 5.3.1.23) (S-methyl-5-thioribose-1-phosphate isomerase) (Translation initiation factor eIF-2B subunit alpha/beta/delta-like protein)	MRI1	Bos taurus (Bovine)	358
DAG1_BOVIN	Protein	O18738	DAG1_BOVIN	Dystroglycan 1 (Dystroglycan) (Dystrophin-associated glycoprotein 1) [Cleaved into: Alpha-dystroglycan (Alpha-DG); Beta-dystroglycan (Beta-DG)]	DAG1	Bos taurus (Bovine)	895
PUR2_BOVIN	Protein	Q59A32	PUR2_BOVIN	Trifunctional purine biosynthetic protein adenosine-3 [Includes: Phosphoribosylamine--glycine ligase (EC 6.3.4.13) (Glycinamide ribonucleotide synthetase) (GARS) (Phosphoribosylglycinamide synthetase); Phosphoribosylformylglycinamidine cyclo-ligase (EC 6.3.3.1) (AIR synthase) (AIRS) (Phosphoribosyl-aminoimidazole synthetase); Phosphoribosylglycinamide formyltransferase (EC 2.1.2.2) (5'-phosphorib…	GART	Bos taurus (Bovine)	1010
FA7_BOVIN	Protein	P22457	FA7_BOVIN	Coagulation factor VII (EC 3.4.21.21) (Serum prothrombin conversion accelerator) [Cleaved into: Factor VII light chain; Factor VII heavy chain]	F7	Bos taurus (Bovine)	447
APT_BOVIN	Protein	Q56JW4	APT_BOVIN	Adenine phosphoribosyltransferase (APRT) (EC 2.4.2.7)	APRT	Bos taurus (Bovine)	180
HPPD_BOVIN	Protein	Q5EA20	HPPD_BOVIN	4-hydroxyphenylpyruvate dioxygenase (EC 1.13.11.27) (4-hydroxyphenylpyruvic acid oxidase) (4HPPD) (HPD) (HPPDase)	HPD	Bos taurus (Bovine)	393
SAP_BOVIN	Protein	P26779	SAP_BOVIN	Prosaposin (Proactivator polypeptide) [Cleaved into: Saposin-A (Protein A); Saposin-B (Cerebroside sulfate activator) (CSAct) (Dispersin) (Sphingolipid activator protein 1) (SAP-1) (Sulfatide/GM1 activator); Saposin-C (A1 activator) (Co-beta-glucosidase) (Glucosylceramidase activator) (Sphingolipid activator protein 2) (SAP-2); Saposin-D (Component C) (Protein C)]	PSAP	Bos taurus (Bovine)	525
PTX3_BOVIN	Protein	Q0VCG9	PTX3_BOVIN	Pentraxin-related protein PTX3 (Pentaxin-related protein PTX3)	PTX3	Bos taurus (Bovine)	382
GDIA_BOVIN	Protein	P21856	GDIA_BOVIN	Rab GDP dissociation inhibitor alpha (Rab GDI alpha) (Guanosine diphosphate dissociation inhibitor 1) (GDI-1) (SMG p25A GDI)	GDI1 RABGDIA	Bos taurus (Bovine)	447
FRIH_BOVIN	Protein	O46414	FRIH_BOVIN	Ferritin heavy chain (Ferritin H subunit) (EC 1.16.3.1) [Cleaved into: Ferritin heavy chain, N-terminally processed]	FTH1 FTH	Bos taurus (Bovine)	181
ENPL_BOVIN	Protein	Q95M18	ENPL_BOVIN	Endoplasmin (94 kDa glucose-regulated protein) (GRP-94) (Heat shock protein 90 kDa beta member 1)	HSP90B1 GRP94 TRA1	Bos taurus (Bovine)	804
ERP44_BOVIN	Protein	Q3T0L2	ERP44_BOVIN	Endoplasmic reticulum resident protein 44 (ER protein 44) (ERp44) (Thioredoxin domain-containing protein 4)	ERP44 TXNDC4	Bos taurus (Bovine)	406
SNX1_BOVIN	Protein	Q05B62	SNX1_BOVIN	Sorting nexin-1	SNX1	Bos taurus (Bovine)	522
DPYD_BOVIN	Protein	Q28007	DPYD_BOVIN	Dihydropyrimidine dehydrogenase [NADP(+)] (DHPDHase) (DPD) (EC 1.3.1.2) (Dihydrothymine dehydrogenase) (Dihydrouracil dehydrogenase)	DPYD	Bos taurus (Bovine)	1025
TTC1_BOVIN	Protein	Q3ZBR5	TTC1_BOVIN	Tetratricopeptide repeat protein 1 (TPR repeat protein 1)	TTC1	Bos taurus (Bovine)	292
TBCA_BOVIN	Protein	P48427	TBCA_BOVIN	Tubulin-specific chaperone A (TCP1-chaperonin cofactor A) (Tubulin-folding cofactor A) (CFA)	TBCA	Bos taurus (Bovine)	108
KAP2_BOVIN	Protein	P00515	KAP2_BOVIN	cAMP-dependent protein kinase type II-alpha regulatory subunit	PRKAR2A	Bos taurus (Bovine)	401
SYYC_BOVIN	Protein	Q29465	SYYC_BOVIN	Tyrosine--tRNA ligase, cytoplasmic (EC 6.1.1.1) (Tyrosyl-tRNA synthetase) (TyrRS) [Cleaved into: Tyrosine--tRNA ligase, cytoplasmic, N-terminally processed]	YARS1 TYRS YARS	Bos taurus (Bovine)	528
NB5R3_BOVIN	Protein	P07514	NB5R3_BOVIN	NADH-cytochrome b5 reductase 3 (B5R) (Cytochrome b5 reductase) (EC 1.6.2.2) (Diaphorase-1)	CYB5R3 DIA1	Bos taurus (Bovine)	301
VTNC_HUMAN	Protein	P04004	VTNC_HUMAN	Vitronectin (VN) (S-protein) (Serum-spreading factor) (V75) [Cleaved into: Vitronectin V65 subunit; Vitronectin V10 subunit; Somatomedin-B]	VTN	Homo sapiens (Human)	478
HRG_HUMAN	Protein	P04196	HRG_HUMAN	Histidine-rich glycoprotein (Histidine-proline-rich glycoprotein) (HPRG)	HRG	Homo sapiens (Human)	525
APOA1_HUMAN	Protein	P02647	APOA1_HUMAN	Apolipoprotein A-I (Apo-AI) (ApoA-I) (Apolipoprotein A1) [Cleaved into: Proapolipoprotein A-I (ProapoA-I); Truncated apolipoprotein A-I (Apolipoprotein A-I(1-242))]	APOA1	Homo sapiens (Human)	267
K2C1_HUMAN	Protein	P04264	K2C1_HUMAN	Keratin, type II cytoskeletal 1 (67 kDa cytokeratin) (Cytokeratin-1) (CK-1) (Hair alpha protein) (Keratin-1) (K1) (Type-II keratin Kb1)	KRT1 KRTA	Homo sapiens (Human)	644
IGHG1_HUMAN	Protein	P01857	IGHG1_HUMAN	Immunoglobulin heavy constant gamma 1 (Ig gamma-1 chain C region) (Ig gamma-1 chain C region EU) (Ig gamma-1 chain C region KOL) (Ig gamma-1 chain C region NIE)	IGHG1	Homo sapiens (Human)	399
KNG1_HUMAN	Protein	P01042	KNG1_HUMAN	Kininogen-1 (Alpha-2-thiol proteinase inhibitor) (Fitzgerald factor) (High molecular weight kininogen) (HMWK) (Williams-Fitzgerald-Flaujeac factor) [Cleaved into: Kininogen-1 heavy chain; T-kinin (Ile-Ser-Bradykinin); Bradykinin (Kallidin I); Lysyl-bradykinin (Kallidin II); Kininogen-1 light chain; Low molecular weight growth-promoting factor]	KNG1 BDK KNG	Homo sapiens (Human)	644
APOC4_HUMAN	Protein	P55056	APOC4_HUMAN	Apolipoprotein C-IV (Apo-CIV) (ApoC-IV) (Apolipoprotein C4)	APOC4	Homo sapiens (Human)	127
FA12_HUMAN	Protein	P00748	FA12_HUMAN	Coagulation factor XII (EC 3.4.21.38) (Hageman factor) (HAF) [Cleaved into: Coagulation factor XIIa heavy chain; Beta-factor XIIa part 1; Coagulation factor XIIa light chain (Beta-factor XIIa part 2)]	F12	Homo sapiens (Human)	615
K22E_HUMAN	Protein	P35908	K22E_HUMAN	Keratin, type II cytoskeletal 2 epidermal (Cytokeratin-2e) (CK-2e) (Epithelial keratin-2e) (Keratin-2 epidermis) (Keratin-2e) (K2e) (Type-II keratin Kb2)	KRT2 KRT2A KRT2E	Homo sapiens (Human)	639
ITIH2_HUMAN	Protein	P19823	ITIH2_HUMAN	Inter-alpha-trypsin inhibitor heavy chain H2 (ITI heavy chain H2) (ITI-HC2) (Inter-alpha-inhibitor heavy chain 2) (Inter-alpha-trypsin inhibitor complex component II) (Serum-derived hyaluronan-associated protein) (SHAP)	ITIH2 IGHEP2	Homo sapiens (Human)	946
K1C13_HUMAN	Protein	P13646	K1C13_HUMAN	Keratin, type I cytoskeletal 13 (Cytokeratin-13) (CK-13) (Keratin-13) (K13)	KRT13	Homo sapiens (Human)	458
TRFE_HUMAN	Protein	P02787	TRFE_HUMAN	Serotransferrin (Transferrin) (Beta-1 metal-binding globulin) (Siderophilin)	TF PRO1400	Homo sapiens (Human)	698
APOB_HUMAN	Protein	P04114	APOB_HUMAN	Apolipoprotein B-100 (Apo B-100) [Cleaved into: Apolipoprotein B-48 (Apo B-48)]	APOB	Homo sapiens (Human)	4563
A1AT_HUMAN	Protein	P01009	A1AT_HUMAN	Alpha-1-antitrypsin (Alpha-1 protease inhibitor) (Alpha-1-antiproteinase) (Serpin A1) [Cleaved into: Short peptide from AAT (SPAAT)]	SERPINA1 AAT PI PRO0684 PRO2209	Homo sapiens (Human)	418
A2MG_HUMAN	Protein	P01023	A2MG_HUMAN	Alpha-2-macroglobulin (Alpha-2-M) (C3 and PZP-like alpha-2-macroglobulin domain-containing protein 5)	A2M CPAMD5 FWP007	Homo sapiens (Human)	1474
K1C10_HUMAN	Protein	P13645	K1C10_HUMAN	Keratin, type I cytoskeletal 10 (Cytokeratin-10) (CK-10) (Keratin-10) (K10)	KRT10 KPP	Homo sapiens (Human)	584
HEMO_HUMAN	Protein	P02790	HEMO_HUMAN	Hemopexin (Beta-1B-glycoprotein)	HPX	Homo sapiens (Human)	462
IGHA1_HUMAN	Protein	P01876	IGHA1_HUMAN	Immunoglobulin heavy constant alpha 1 (Ig alpha-1 chain C region) (Ig alpha-1 chain C region BUR) (Ig alpha-1 chain C region TRO)	IGHA1	Homo sapiens (Human)	398
FCN1_HUMAN	Protein	O00602	FCN1_HUMAN	Ficolin-1 (Collagen/fibrinogen domain-containing protein 1) (Ficolin-A) (Ficolin-alpha) (M-ficolin)	FCN1 FCNM	Homo sapiens (Human)	326
CO3_HUMAN	Protein	P01024	CO3_HUMAN	Complement C3 (C3 and PZP-like alpha-2-macroglobulin domain-containing protein 1) [Cleaved into: Complement C3 beta chain; C3-beta-c (C3bc); Complement C3 alpha chain; C3a anaphylatoxin; Acylation stimulating protein (ASP) (C3adesArg); Complement C3b alpha' chain; Complement C3c alpha' chain fragment 1; Complement C3dg fragment; Complement C3g fragment; Complement C3d fragment; Complement C3f fra…	C3 CPAMD1	Homo sapiens (Human)	1663
APOC2_HUMAN	Protein	P02655	APOC2_HUMAN	Apolipoprotein C-II (Apo-CII) (ApoC-II) (Apolipoprotein C2) [Cleaved into: Proapolipoprotein C-II (ProapoC-II)]	APOC2 APC2	Homo sapiens (Human)	101
IGKC_HUMAN	Protein	P01834	IGKC_HUMAN	Immunoglobulin kappa constant (Ig kappa chain C region) (Ig kappa chain C region AG) (Ig kappa chain C region CUM) (Ig kappa chain C region EU) (Ig kappa chain C region OU) (Ig kappa chain C region ROY) (Ig kappa chain C region TI)	IGKC	Homo sapiens (Human)	107
CLUS_HUMAN	Protein	P10909	CLUS_HUMAN	Clusterin (Aging-associated gene 4 protein) (Apolipoprotein J) (Apo-J) (Complement cytolysis inhibitor) (CLI) (Complement-associated protein SP-40,40) (Ku70-binding protein 1) (NA1/NA2) (Sulfated glycoprotein 2) (SGP-2) (Testosterone-repressed prostate message 2) (TRPM-2) [Cleaved into: Clusterin beta chain (ApoJalpha) (Complement cytolysis inhibitor a chain) (SP-40,40 beta-chain); Clusterin alph…	CLU APOJ CLI KUB1 AAG4	Homo sapiens (Human)	449
APOH_HUMAN	Protein	P02749	APOH_HUMAN	Beta-2-glycoprotein 1 (APC inhibitor) (Activated protein C-binding protein) (Anticardiolipin cofactor) (Apolipoprotein H) (Apo-H) (Beta-2-glycoprotein I) (B2GPI) (Beta(2)GPI)	APOH B2G1	Homo sapiens (Human)	345
AACT_HUMAN	Protein	P01011	AACT_HUMAN	Alpha-1-antichymotrypsin (ACT) (Cell growth-inhibiting gene 24/25 protein) (Serpin A3) [Cleaved into: Alpha-1-antichymotrypsin His-Pro-less]	SERPINA3 AACT GIG24 GIG25	Homo sapiens (Human)	423
CO5_HUMAN	Protein	P01031	CO5_HUMAN	Complement C5 (C3 and PZP-like alpha-2-macroglobulin domain-containing protein 4) [Cleaved into: Complement C5 beta chain; Complement C5 alpha chain; C5a anaphylatoxin; Complement C5 alpha' chain]	C5 CPAMD4	Homo sapiens (Human)	1676
HBB_HUMAN	Protein	P68871	HBB_HUMAN	Hemoglobin subunit beta (Beta-globin) (Hemoglobin beta chain) [Cleaved into: LVV-hemorphin-7; Spinorphin]	HBB	Homo sapiens (Human)	147
CFAB_HUMAN	Protein	P00751	CFAB_HUMAN	Complement factor B (EC 3.4.21.47) (C3/C5 convertase) (Glycine-rich beta glycoprotein) (GBG) (PBF2) (Properdin factor B) [Cleaved into: Complement factor B Ba fragment; Complement factor B Bb fragment]	CFB BF BFD	Homo sapiens (Human)	764
K1C14_HUMAN	Protein	P02533	K1C14_HUMAN	Keratin, type I cytoskeletal 14 (Cytokeratin-14) (CK-14) (Keratin-14) (K14)	KRT14	Homo sapiens (Human)	472
APOL1_HUMAN	Protein	O14791	APOL1_HUMAN	Apolipoprotein L1 (Apolipoprotein L) (Apo-L) (ApoL) (Apolipoprotein L-I) (ApoL-I)	APOL1 APOL	Homo sapiens (Human)	398
QSOX1_HUMAN	Protein	O00391	QSOX1_HUMAN	Sulfhydryl oxidase 1 (hQSOX) (EC 1.8.3.2) (Quiescin Q6)	QSOX1 QSCN6 UNQ2520/PRO6013	Homo sapiens (Human)	747
K2C5_HUMAN	Protein	P13647	K2C5_HUMAN	Keratin, type II cytoskeletal 5 (58 kDa cytokeratin) (Cytokeratin-5) (CK-5) (Keratin-5) (K5) (Type-II keratin Kb5)	KRT5	Homo sapiens (Human)	590
HEP2_HUMAN	Protein	P05546	HEP2_HUMAN	Heparin cofactor 2 (Heparin cofactor II) (HC-II) (Protease inhibitor leuserpin-2) (HLS2) (Serpin D1)	SERPIND1 HCF2	Homo sapiens (Human)	499
SAMP_HUMAN	Protein	P02743	SAMP_HUMAN	Serum amyloid P-component (SAP) (9.5S alpha-1-glycoprotein) [Cleaved into: Serum amyloid P-component(1-203)]	APCS PTX2	Homo sapiens (Human)	223
A1BG_HUMAN	Protein	P04217	A1BG_HUMAN	Alpha-1B-glycoprotein (Alpha-1-B glycoprotein)	A1BG	Homo sapiens (Human)	495
THBG_HUMAN	Protein	P05543	THBG_HUMAN	Thyroxine-binding globulin (Serpin A7) (T4-binding globulin)	SERPINA7 TBG	Homo sapiens (Human)	415
A1AG1_HUMAN	Protein	P02763	A1AG1_HUMAN	Alpha-1-acid glycoprotein 1 (AGP 1) (Orosomucoid-1) (OMD 1)	ORM1 AGP1	Homo sapiens (Human)	201
VTDB_HUMAN	Protein	P02774	VTDB_HUMAN	Vitamin D-binding protein (DBP) (VDB) (Gc protein-derived macrophage activating factor) (Gc-MAF) (GcMAF) (Gc-globulin) (Group-specific component) (Gc) (Vitamin D-binding protein-macrophage activating factor) (DBP-maf)	GC	Homo sapiens (Human)	474
PON1_HUMAN	Protein	P27169	PON1_HUMAN	Serum paraoxonase/arylesterase 1 (PON 1) (EC 3.1.1.2) (EC 3.1.1.81) (EC 3.1.8.1) (Aromatic esterase 1) (A-esterase 1) (K-45) (Serum aryldialkylphosphatase 1)	PON1 PON	Homo sapiens (Human)	355
CO8B_HUMAN	Protein	P07358	CO8B_HUMAN	Complement component C8 beta chain (Complement component 8 subunit beta)	C8B	Homo sapiens (Human)	591
KPYM_HUMAN	Protein	P14618	KPYM_HUMAN	Pyruvate kinase PKM (EC 2.7.1.40) (Cytosolic thyroid hormone-binding protein) (CTHBP) (Opa-interacting protein 3) (OIP-3) (Pyruvate kinase 2/3) (Pyruvate kinase muscle isozyme) (Threonine-protein kinase PKM2) (EC 2.7.11.1) (Thyroid hormone-binding protein 1) (THBP1) (Tumor M2-PK) (Tyrosine-protein kinase PKM2) (EC 2.7.10.2) (p58)	PKM OIP3 PK2 PK3 PKM2	Homo sapiens (Human)	531
ANGT_HUMAN	Protein	P01019	ANGT_HUMAN	Angiotensinogen (Serpin A8) [Cleaved into: Angiotensin-1 (Angiotensin 1-10) (Angiotensin I) (Ang I); Angiotensin-2 (Angiotensin 1-8) (Angiotensin II) (Ang II); Angiotensin-3 (Angiotensin 2-8) (Angiotensin III) (Ang III) (Des-Asp[1]-angiotensin II); Angiotensin-4 (Angiotensin 3-8) (Angiotensin IV) (Ang IV); Angiotensin 1-9; Angiotensin 1-7; Angiotensin 1-5; Angiotensin 1-4]	AGT SERPINA8	Homo sapiens (Human)	485
CERU_HUMAN	Protein	P00450	CERU_HUMAN	Ceruloplasmin (EC 1.16.3.1) (Ferroxidase)	CP	Homo sapiens (Human)	1065
ANGI_HUMAN	Protein	P03950	ANGI_HUMAN	Angiogenin (EC 3.1.27.-) (Ribonuclease 5) (RNase 5)	ANG RNASE5	Homo sapiens (Human)	147
THRB_HUMAN	Protein	P00734	THRB_HUMAN	Prothrombin (EC 3.4.21.5) (Coagulation factor II) [Cleaved into: Activation peptide fragment 1; Activation peptide fragment 2; Thrombin light chain; Thrombin heavy chain]	F2	Homo sapiens (Human)	622
HV374_HUMAN	Protein	A0A0B4J1X5	HV374_HUMAN	Immunoglobulin heavy variable 3-74	IGHV3-74	Homo sapiens (Human)	117
LMNA_HUMAN	Protein	P02545	LMNA_HUMAN	Prelamin-A/C [Cleaved into: Lamin-A/C (70 kDa lamin) (Renal carcinoma antigen NY-REN-32)]	LMNA LMN1	Homo sapiens (Human)	664
ZA2G_HUMAN	Protein	P25311	ZA2G_HUMAN	Zinc-alpha-2-glycoprotein (Zn-alpha-2-GP) (Zn-alpha-2-glycoprotein)	AZGP1 ZAG ZNGP1	Homo sapiens (Human)	298
G3P_HUMAN	Protein	P04406	G3P_HUMAN	Glyceraldehyde-3-phosphate dehydrogenase (GAPDH) (EC 1.2.1.12) (Peptidyl-cysteine S-nitrosylase GAPDH) (EC 2.6.99.-)	GAPDH GAPD CDABP0047 OK/SW-cl.12	Homo sapiens (Human)	335
ITIH1_HUMAN	Protein	P19827	ITIH1_HUMAN	Inter-alpha-trypsin inhibitor heavy chain H1 (ITI heavy chain H1) (ITI-HC1) (Inter-alpha-inhibitor heavy chain 1) (Inter-alpha-trypsin inhibitor complex component III) (Serum-derived hyaluronan-associated protein) (SHAP)	ITIH1 IGHEP1	Homo sapiens (Human)	911
ALS_HUMAN	Protein	P35858	ALS_HUMAN	Insulin-like growth factor-binding protein complex acid labile subunit (ALS)	IGFALS ALS	Homo sapiens (Human)	605
K2C6A_HUMAN	Protein	P02538	K2C6A_HUMAN	Keratin, type II cytoskeletal 6A (Cytokeratin-6A) (CK-6A) (Cytokeratin-6D) (CK-6D) (Keratin-6A) (K6A) (Type-II keratin Kb6) (allergen Hom s 5)	KRT6A K6A KRT6D	Homo sapiens (Human)	564
CAMP_HUMAN	Protein	P49913	CAMP_HUMAN	Cathelicidin antimicrobial peptide (18 kDa cationic antimicrobial protein) (CAP-18) (hCAP-18) [Cleaved into: Antibacterial peptide FALL-39 (FALL-39 peptide antibiotic); Antibacterial peptide LL-37; Antibacterial peptide KR-20; Antibacterial peptide LL-23; Antibacterial peptide LL-29; Antibacterial peptide KS-30; Antibacterial peptide RK-31; Antibacterial peptide FF-33]	CAMP CAP18 FALL39 HSD26	Homo sapiens (Human)	170
SDF1_HUMAN	Protein	P48061	SDF1_HUMAN	Stromal cell-derived factor 1 (SDF-1) (hSDF-1) (C-X-C motif chemokine 12) (Intercrine reduced in hepatomas) (IRH) (hIRH) (Pre-B cell growth-stimulating factor) (PBSF) [Cleaved into: SDF-1-beta(3-72); SDF-1-alpha(3-67)]	CXCL12 SDF1 SDF1A SDF1B	Homo sapiens (Human)	93
CO6A1_HUMAN	Protein	P12109	CO6A1_HUMAN	Collagen alpha-1(VI) chain	COL6A1	Homo sapiens (Human)	1028
CO9_HUMAN	Protein	P02748	CO9_HUMAN	Complement component C9 [Cleaved into: Complement component C9a; Complement component C9b]	C9	Homo sapiens (Human)	559
PLTP_HUMAN	Protein	P55058	PLTP_HUMAN	Phospholipid transfer protein (Lipid transfer protein II)	PLTP	Homo sapiens (Human)	493
CO8A_HUMAN	Protein	P07357	CO8A_HUMAN	Complement component C8 alpha chain (Complement component 8 subunit alpha)	C8A	Homo sapiens (Human)	584
DESP_HUMAN	Protein	P15924	DESP_HUMAN	Desmoplakin (DP) (250/210 kDa paraneoplastic pemphigus antigen)	DSP	Homo sapiens (Human)	2871
LV861_HUMAN	Protein	A0A075B6I0	LV861_HUMAN	Immunoglobulin lambda variable 8-61	IGLV8-61	Homo sapiens (Human)	122
STOM_HUMAN	Protein	P27105	STOM_HUMAN	Stomatin (Erythrocyte band 7 integral membrane protein) (Erythrocyte membrane protein band 7.2) (Protein 7.2b)	STOM BND7 EPB72	Homo sapiens (Human)	288
CFAH_HUMAN	Protein	P08603	CFAH_HUMAN	Complement factor H (H factor 1)	CFH HF HF1 HF2	Homo sapiens (Human)	1231
HV601_HUMAN	Protein	A0A0B4J1U7	HV601_HUMAN	Immunoglobulin heavy variable 6-1	IGHV6-1	Homo sapiens (Human)	121
HBA_HUMAN	Protein	P69905	HBA_HUMAN	Hemoglobin subunit alpha (Alpha-globin) (Hemoglobin alpha chain) [Cleaved into: Hemopressin]	HBA1; HBA2	Homo sapiens (Human)	142
FLNB_HUMAN	Protein	O75369	FLNB_HUMAN	Filamin-B (FLN-B) (ABP-278) (ABP-280 homolog) (Actin-binding-like protein) (Beta-filamin) (Filamin homolog 1) (Fh1) (Filamin-3) (Thyroid autoantigen) (Truncated actin-binding protein) (Truncated ABP)	FLNB FLN1L FLN3 TABP TAP	Homo sapiens (Human)	2602
TLN1_HUMAN	Protein	Q9Y490	TLN1_HUMAN	Talin-1	TLN1 KIAA1027 TLN	Homo sapiens (Human)	2541
C1QC_HUMAN	Protein	P02747	C1QC_HUMAN	Complement C1q subcomponent subunit C	C1QC C1QG	Homo sapiens (Human)	245
ANGL3_HUMAN	Protein	Q9Y5C1	ANGL3_HUMAN	Angiopoietin-related protein 3 (Angiopoietin-5) (ANG-5) (Angiopoietin-like protein 3) [Cleaved into: ANGPTL3(17-221); ANGPTL3(17-224)]	ANGPTL3 ANGPT5 UNQ153/PRO179	Homo sapiens (Human)	460
C1QB_HUMAN	Protein	P02746	C1QB_HUMAN	Complement C1q subcomponent subunit B	C1QB	Homo sapiens (Human)	253
A2GL_HUMAN	Protein	P02750	A2GL_HUMAN	Leucine-rich alpha-2-glycoprotein (LRG)	LRG1 LRG	Homo sapiens (Human)	347
FLNA_HUMAN	Protein	P21333	FLNA_HUMAN	Filamin-A (FLN-A) (Actin-binding protein 280) (ABP-280) (Alpha-filamin) (Endothelial actin-binding protein) (Filamin-1) (Non-muscle filamin)	FLNA FLN FLN1	Homo sapiens (Human)	2647
COIA1_HUMAN	Protein	P39060	COIA1_HUMAN	Collagen alpha-1(XVIII) chain [Cleaved into: Endostatin; Non-collagenous domain 1 (NC1)]	COL18A1	Homo sapiens (Human)	1754
POSTN_HUMAN	Protein	Q15063	POSTN_HUMAN	Periostin (PN) (Osteoblast-specific factor 2) (OSF-2)	POSTN OSF2	Homo sapiens (Human)	836
HABP2_HUMAN	Protein	Q14520	HABP2_HUMAN	Hyaluronan-binding protein 2 (EC 3.4.21.-) (Factor VII-activating protease) (Factor seven-activating protease) (FSAP) (Hepatocyte growth factor activator-like protein) (Plasma hyaluronan-binding protein) [Cleaved into: Hyaluronan-binding protein 2 50 kDa heavy chain; Hyaluronan-binding protein 2 50 kDa heavy chain alternate form; Hyaluronan-binding protein 2 27 kDa light chain; Hyaluronan-binding…	HABP2 HGFAL PHBP	Homo sapiens (Human)	560
AFAM_HUMAN	Protein	P43652	AFAM_HUMAN	Afamin (Alpha-albumin) (Alpha-Alb)	AFM ALB2 ALBA	Homo sapiens (Human)	599
HPTR_HUMAN	Protein	P00739	HPTR_HUMAN	Haptoglobin-related protein	HPR	Homo sapiens (Human)	348
MASP1_HUMAN	Protein	P48740	MASP1_HUMAN	Mannan-binding lectin serine protease 1 (EC 3.4.21.-) (Complement factor MASP-3) (Complement-activating component of Ra-reactive factor) (Mannose-binding lectin-associated serine protease 1) (MASP-1) (Mannose-binding protein-associated serine protease) (Ra-reactive factor serine protease p100) (RaRF) (Serine protease 5) [Cleaved into: Mannan-binding lectin serine protease 1 heavy chain; Mannan-bi…	MASP1 CRARF CRARF1 PRSS5	Homo sapiens (Human)	699
CCL18_HUMAN	Protein	P55774	CCL18_HUMAN	C-C motif chemokine 18 (Alternative macrophage activation-associated CC chemokine 1) (AMAC-1) (CC chemokine PARC) (Dendritic cell chemokine 1) (DC-CK1) (Macrophage inflammatory protein 4) (MIP-4) (Pulmonary and activation-regulated chemokine) (Small-inducible cytokine A18) [Cleaved into: CCL18(1-68); CCL18(3-69); CCL18(4-69)]	CCL18 AMAC1 DCCK1 MIP4 PARC SCYA18	Homo sapiens (Human)	89
APOC3_HUMAN	Protein	P02656	APOC3_HUMAN	Apolipoprotein C-III (Apo-CIII) (ApoC-III) (Apolipoprotein C3)	APOC3	Homo sapiens (Human)	99
PHLD_HUMAN	Protein	P80108	PHLD_HUMAN	Phosphatidylinositol-glycan-specific phospholipase D (PI-G PLD) (EC 3.1.4.50) (Glycoprotein phospholipase D) (Glycosyl-phosphatidylinositol-specific phospholipase D) (GPI-PLD) (GPI-specific phospholipase D)	GPLD1 PIGPLD1	Homo sapiens (Human)	840
CO4B_HUMAN	Protein	P0C0L5	CO4B_HUMAN	Complement C4-B (Basic complement C4) (C3 and PZP-like alpha-2-macroglobulin domain-containing protein 3) [Cleaved into: Complement C4 beta chain; Complement C4-B alpha chain; C4a anaphylatoxin; C4b-B; C4d-B; Complement C4 gamma chain]	C4B CO4 CPAMD3; C4B_2	Homo sapiens (Human)	1744
KPRP_HUMAN	Protein	Q5T749	KPRP_HUMAN	Keratinocyte proline-rich protein (hKPRP)	KPRP C1orf45	Homo sapiens (Human)	579
B3AT_HUMAN	Protein	P02730	B3AT_HUMAN	Band 3 anion transport protein (Anion exchange protein 1) (AE 1) (Anion exchanger 1) (Solute carrier family 4 member 1) (CD antigen CD233)	SLC4A1 AE1 DI EPB3	Homo sapiens (Human)	911
CPN2_HUMAN	Protein	P22792	CPN2_HUMAN	Carboxypeptidase N subunit 2 (Carboxypeptidase N 83 kDa chain) (Carboxypeptidase N large subunit) (Carboxypeptidase N polypeptide 2) (Carboxypeptidase N regulatory subunit)	CPN2 ACBP	Homo sapiens (Human)	545
LV319_HUMAN	Protein	P01714	LV319_HUMAN	Immunoglobulin lambda variable 3-19 (Ig lambda chain V-III region SH)	IGLV3-19	Homo sapiens (Human)	112
TRFL_HUMAN	Protein	P02788	TRFL_HUMAN	Lactotransferrin (Lactoferrin) (EC 3.4.21.-) (Growth-inhibiting protein 12) (Talalactoferrin) [Cleaved into: Lactoferricin-H (Lfcin-H); Kaliocin-1; Lactoferroxin-A; Lactoferroxin-B; Lactoferroxin-C]	LTF GIG12 LF	Homo sapiens (Human)	710
C1QT3_HUMAN	Protein	Q9BXJ4	C1QT3_HUMAN	Complement C1q tumor necrosis factor-related protein 3 (Collagenous repeat-containing sequence 26 kDa protein) (CORS26) (Secretory protein CORS26)	C1QTNF3 CTRP3 UNQ753/PRO1484	Homo sapiens (Human)	246
BPIB1_HUMAN	Protein	Q8TDL5	BPIB1_HUMAN	BPI fold-containing family B member 1 (Long palate, lung and nasal epithelium carcinoma-associated protein 1) (von Ebner minor salivary gland protein) (VEMSGP)	BPIFB1 C20orf114 LPLUNC1 UNQ706/PRO1357	Homo sapiens (Human)	484
5MP2_HUMAN	Protein	Q7L1Q6	5MP2_HUMAN	eIF5-mimic protein 2 (Basic leucine zipper and W2 domain-containing protein 1) (Protein Orf)	BZW1 5MP2 BZAP45 KIAA0005	Homo sapiens (Human)	419
PROS_HUMAN	Protein	P07225	PROS_HUMAN	Vitamin K-dependent protein S	PROS1 PROS	Homo sapiens (Human)	676
CO6A3_HUMAN	Protein	P12111	CO6A3_HUMAN	Collagen alpha-3(VI) chain	COL6A3	Homo sapiens (Human)	3177
ENOA_HUMAN	Protein	P06733	ENOA_HUMAN	Alpha-enolase (EC 4.2.1.11) (2-phospho-D-glycerate hydro-lyase) (C-myc promoter-binding protein) (Enolase 1) (MBP-1) (MPB-1) (Non-neural enolase) (NNE) (Phosphopyruvate hydratase) (Plasminogen-binding protein)	ENO1 ENO1L1 MBPB1 MPB1	Homo sapiens (Human)	434
ATL4_HUMAN	Protein	Q6UY14	ATL4_HUMAN	ADAMTS-like protein 4 (ADAMTSL-4) (Thrombospondin repeat-containing protein 1)	ADAMTSL4 TSRC1 PP1396 UNQ2803/PRO34012	Homo sapiens (Human)	1074
CCL14_HUMAN	Protein	Q16627	CCL14_HUMAN	C-C motif chemokine 14 (Chemokine CC-1/CC-3) (HCC-1/HCC-3) (HCC-1(1-74)) (NCC-2) (Small-inducible cytokine A14) [Cleaved into: HCC-1(3-74); HCC-1(4-74); HCC-1(9-74)]	CCL14 NCC2 SCYA14	Homo sapiens (Human)	93
LCAT_HUMAN	Protein	P04180	LCAT_HUMAN	Phosphatidylcholine-sterol acyltransferase (EC 2.3.1.43) (1-alkyl-2-acetylglycerophosphocholine esterase) (EC 3.1.1.47) (Lecithin-cholesterol acyltransferase) (Phospholipid-cholesterol acyltransferase) (Platelet-activating factor acetylhydrolase) (PAF acetylhydrolase)	LCAT	Homo sapiens (Human)	440
APOF_HUMAN	Protein	Q13790	APOF_HUMAN	Apolipoprotein F (Apo-F) (Lipid transfer inhibitor protein) (LTIP)	APOF	Homo sapiens (Human)	326
K2C1B_HUMAN	Protein	Q7Z794	K2C1B_HUMAN	Keratin, type II cytoskeletal 1b (Cytokeratin-1B) (CK-1B) (Keratin-77) (K77) (Type-II keratin Kb39)	KRT77 KRT1B	Homo sapiens (Human)	578
PROF1_HUMAN	Protein	P07737	PROF1_HUMAN	Profilin-1 (Epididymis tissue protein Li 184a) (Profilin I)	PFN1	Homo sapiens (Human)	140
FILA2_HUMAN	Protein	Q5D862	FILA2_HUMAN	Filaggrin-2 (FLG-2) (Intermediate filament-associated and psoriasis-susceptibility protein) (Ifapsoriasin)	FLG2 IFPS	Homo sapiens (Human)	2391
CETP_HUMAN	Protein	P11597	CETP_HUMAN	Cholesteryl ester transfer protein (Lipid transfer protein I)	CETP	Homo sapiens (Human)	493
C1R_HUMAN	Protein	P00736	C1R_HUMAN	Complement C1r subcomponent (EC 3.4.21.41) (Complement component 1 subcomponent r) [Cleaved into: Complement C1r subcomponent heavy chain; Complement C1r subcomponent light chain]	C1R	Homo sapiens (Human)	705
URP2_HUMAN	Protein	Q86UX7	URP2_HUMAN	Fermitin family homolog 3 (Kindlin-3) (MIG2-like protein) (Unc-112-related protein 2)	FERMT3 KIND3 MIG2B URP2	Homo sapiens (Human)	667
CO8G_HUMAN	Protein	P07360	CO8G_HUMAN	Complement component C8 gamma chain	C8G	Homo sapiens (Human)	202
KV401_HUMAN	Protein	P06312	KV401_HUMAN	Immunoglobulin kappa variable 4-1 (Ig kappa chain V-IV region B17) (Ig kappa chain V-IV region JI) (Ig kappa chain V-IV region Len) (Ig kappa chain V-IV region STH)	IGKV4-1	Homo sapiens (Human)	121
TENX_HUMAN	Protein	P22105	TENX_HUMAN	Tenascin-X (TN-X) (Hexabrachion-like protein)	TNXB HXBL TNX TNXB1 TNXB2 XB	Homo sapiens (Human)	4244
PCOC1_HUMAN	Protein	Q15113	PCOC1_HUMAN	Procollagen C-endopeptidase enhancer 1 (Procollagen COOH-terminal proteinase enhancer 1) (PCPE-1) (Procollagen C-proteinase enhancer 1) (Type 1 procollagen C-proteinase enhancer protein) (Type I procollagen COOH-terminal proteinase enhancer)	PCOLCE PCPE1	Homo sapiens (Human)	449
DSG1_HUMAN	Protein	Q02413	DSG1_HUMAN	Desmoglein-1 (Cadherin family member 4) (Desmosomal glycoprotein 1) (DG1) (DGI) (Pemphigus foliaceus antigen)	DSG1 CDHF4	Homo sapiens (Human)	1049
IGHD_HUMAN	Protein	P01880	IGHD_HUMAN	Immunoglobulin heavy constant delta (Ig delta chain C region) (Ig delta chain C region NIG-65) (Ig delta chain C region WAH)	IGHD	Homo sapiens (Human)	430
TITIN_HUMAN	Protein	Q8WZ42	TITIN_HUMAN	Titin (EC 2.7.11.1) (Connectin) (Rhabdomyosarcoma antigen MU-RMS-40.14)	TTN	Homo sapiens (Human)	34350
PPIP2_HUMAN	Protein	Q9H939	PPIP2_HUMAN	Proline-serine-threonine phosphatase-interacting protein 2 (PEST phosphatase-interacting protein 2)	PSTPIP2	Homo sapiens (Human)	334
ITA2B_HUMAN	Protein	P08514	ITA2B_HUMAN	Integrin alpha-IIb (GPalpha IIb) (GPIIb) (Platelet membrane glycoprotein IIb) (CD antigen CD41) [Cleaved into: Integrin alpha-IIb heavy chain; Integrin alpha-IIb light chain, form 1; Integrin alpha-IIb light chain, form 2]	ITGA2B GP2B ITGAB	Homo sapiens (Human)	1039
FA9_HUMAN	Protein	P00740	FA9_HUMAN	Coagulation factor IX (EC 3.4.21.22) (Christmas factor) (Plasma thromboplastin component) (PTC) [Cleaved into: Coagulation factor IXa light chain; Coagulation factor IXa heavy chain]	F9	Homo sapiens (Human)	461
IPSP_HUMAN	Protein	P05154	IPSP_HUMAN	Plasma serine protease inhibitor (Acrosomal serine protease inhibitor) (Plasminogen activator inhibitor 3) (PAI-3) (PAI3) (Protein C inhibitor) (PCI) (Serpin A5)	SERPINA5 PCI PLANH3 PROCI	Homo sapiens (Human)	406
PRDX2_HUMAN	Protein	P32119	PRDX2_HUMAN	Peroxiredoxin-2 (EC 1.11.1.24) (Natural killer cell-enhancing factor B) (NKEF-B) (PRP) (Thiol-specific antioxidant protein) (TSA) (Thioredoxin peroxidase 1) (Thioredoxin-dependent peroxide reductase 1) (Thioredoxin-dependent peroxiredoxin 2)	PRDX2 NKEFB TDPX1	Homo sapiens (Human)	198
PA2GA_HUMAN	Protein	P14555	PA2GA_HUMAN	Phospholipase A2, membrane associated (EC 3.1.1.4) (GIIC sPLA2) (Group IIA phospholipase A2) (Non-pancreatic secretory phospholipase A2) (NPS-PLA2) (Phosphatidylcholine 2-acylhydrolase 2A)	PLA2G2A PLA2B PLA2L RASF-A	Homo sapiens (Human)	144
RS14_HUMAN	Protein	P62263	RS14_HUMAN	Small ribosomal subunit protein uS11 (40S ribosomal protein S14)	RPS14 PRO2640	Homo sapiens (Human)	151
VIME_HUMAN	Protein	P08670	VIME_HUMAN	Vimentin	VIM	Homo sapiens (Human)	466
ANXA1_HUMAN	Protein	P04083	ANXA1_HUMAN	Annexin A1 (Annexin I) (Annexin-1) (Calpactin II) (Calpactin-2) (Chromobindin-9) (Lipocortin I) (Phospholipase A2 inhibitory protein) (p35) [Cleaved into: Annexin Ac2-26]	ANXA1 ANX1 LPC1	Homo sapiens (Human)	346
CO2_HUMAN	Protein	P06681	CO2_HUMAN	Complement C2 (EC 3.4.21.43) (C3/C5 convertase) [Cleaved into: Complement C2b fragment; Complement C2a fragment]	C2	Homo sapiens (Human)	752
HORN_HUMAN	Protein	Q86YZ3	HORN_HUMAN	Hornerin	HRNR S100A18	Homo sapiens (Human)	2850
LDHA_HUMAN	Protein	P00338	LDHA_HUMAN	L-lactate dehydrogenase A chain (LDH-A) (EC 1.1.1.27) (Cell proliferation-inducing gene 19 protein) (LDH muscle subunit) (LDH-M) (Renal carcinoma antigen NY-REN-59)	LDHA PIG19	Homo sapiens (Human)	332
PRDX1_HUMAN	Protein	Q06830	PRDX1_HUMAN	Peroxiredoxin-1 (EC 1.11.1.24) (Natural killer cell-enhancing factor A) (NKEF-A) (Proliferation-associated gene protein) (PAG) (Thioredoxin peroxidase 2) (Thioredoxin-dependent peroxide reductase 2) (Thioredoxin-dependent peroxiredoxin 1)	PRDX1 PAGA PAGB TDPX2	Homo sapiens (Human)	199
CBG_HUMAN	Protein	P08185	CBG_HUMAN	Corticosteroid-binding globulin (CBG) (Serpin A6) (Transcortin)	SERPINA6 CBG	Homo sapiens (Human)	405
LBP_HUMAN	Protein	P18428	LBP_HUMAN	Lipopolysaccharide-binding protein (LBP)	LBP	Homo sapiens (Human)	481
THIC_HUMAN	Protein	Q9BWD1	THIC_HUMAN	Acetyl-CoA acetyltransferase, cytosolic (EC 2.3.1.9) (Acetyl-CoA transferase-like protein) (Cytosolic acetoacetyl-CoA thiolase)	ACAT2 ACTL	Homo sapiens (Human)	397
SNED1_HUMAN	Protein	Q8TER0	SNED1_HUMAN	Sushi, nidogen and EGF-like domain-containing protein 1 (Insulin-responsive sequence DNA-binding protein 1) (IRE-BP1)	SNED1	Homo sapiens (Human)	1413
CATA_HUMAN	Protein	P04040	CATA_HUMAN	Catalase (EC 1.11.1.6)	CAT	Homo sapiens (Human)	527
FBLN3_HUMAN	Protein	Q12805	FBLN3_HUMAN	EGF-containing fibulin-like extracellular matrix protein 1 (Extracellular protein S1-5) (Fibrillin-like protein) (Fibulin-3) (FIBL-3)	EFEMP1 FBLN3 FBNL	Homo sapiens (Human)	493
FA10_HUMAN	Protein	P00742	FA10_HUMAN	Coagulation factor X (EC 3.4.21.6) (Stuart factor) (Stuart-Prower factor) [Cleaved into: Factor X light chain; Factor X heavy chain; Activated factor Xa heavy chain]	F10	Homo sapiens (Human)	488
TGM3_HUMAN	Protein	Q08188	TGM3_HUMAN	Protein-glutamine gamma-glutamyltransferase E (EC 2.3.2.13) (Transglutaminase E) (TG(E)) (TGE) (TGase E) (Transglutaminase-3) (TGase-3) [Cleaved into: Protein-glutamine gamma-glutamyltransferase E 50 kDa catalytic chain; Protein-glutamine gamma-glutamyltransferase E 27 kDa non-catalytic chain]	TGM3	Homo sapiens (Human)	693
PLEK_HUMAN	Protein	P08567	PLEK_HUMAN	Pleckstrin (Platelet 47 kDa protein) (p47)	PLEK P47	Homo sapiens (Human)	350
FCN2_HUMAN	Protein	Q15485	FCN2_HUMAN	Ficolin-2 (37 kDa elastin-binding protein) (Collagen/fibrinogen domain-containing protein 2) (EBP-37) (Ficolin-B) (Ficolin-beta) (Hucolin) (L-ficolin) (Serum lectin p35)	FCN2 FCNL	Homo sapiens (Human)	313
HV372_HUMAN	Protein	A0A0B4J1Y9	HV372_HUMAN	Immunoglobulin heavy variable 3-72	IGHV3-72	Homo sapiens (Human)	119
RL22_HUMAN	Protein	P35268	RL22_HUMAN	Large ribosomal subunit protein eL22 (60S ribosomal protein L22) (EBER-associated protein) (EAP) (Epstein-Barr virus small RNA-associated protein) (Heparin-binding protein HBp15)	RPL22	Homo sapiens (Human)	128
CO7_HUMAN	Protein	P10643	CO7_HUMAN	Complement component C7	C7	Homo sapiens (Human)	843
RNAS1_HUMAN	Protein	P07998	RNAS1_HUMAN	Ribonuclease pancreatic (EC 4.6.1.18) (HP-RNase) (RIB-1) (RNase UpI-1) (Ribonuclease 1) (RNase 1) (Ribonuclease A) (RNase A)	RNASE1 RIB1 RNS1	Homo sapiens (Human)	156
ITB3_HUMAN	Protein	P05106	ITB3_HUMAN	Integrin beta-3 (Platelet membrane glycoprotein IIIa) (GPIIIa) (CD antigen CD61)	ITGB3 GP3A	Homo sapiens (Human)	788
PGBM_HUMAN	Protein	P98160	PGBM_HUMAN	Basement membrane-specific heparan sulfate proteoglycan core protein (HSPG) (Perlecan) (PLC) [Cleaved into: Endorepellin; LG3 peptide]	HSPG2	Homo sapiens (Human)	4391
TENA_HUMAN	Protein	P24821	TENA_HUMAN	Tenascin (TN) (Cytotactin) (GMEM) (GP 150-225) (Glioma-associated-extracellular matrix antigen) (Hexabrachion) (JI) (Myotendinous antigen) (Neuronectin) (Tenascin-C) (TN-C)	TNC HXB	Homo sapiens (Human)	2201
ANXA5_HUMAN	Protein	P08758	ANXA5_HUMAN	Annexin A5 (Anchorin CII) (Annexin V) (Annexin-5) (Calphobindin I) (CPB-I) (Endonexin II) (Lipocortin V) (Placental anticoagulant protein 4) (PP4) (Placental anticoagulant protein I) (PAP-I) (Thromboplastin inhibitor) (Vascular anticoagulant-alpha) (VAC-alpha)	ANXA5 ANX5 ENX2 PP4	Homo sapiens (Human)	320
SPB5_HUMAN	Protein	P36952	SPB5_HUMAN	Serpin B5 (Maspin) (Peptidase inhibitor 5) (PI-5)	SERPINB5 PI5	Homo sapiens (Human)	375
LRP1_HUMAN	Protein	Q07954	LRP1_HUMAN	Prolow-density lipoprotein receptor-related protein 1 (LRP-1) (Alpha-2-macroglobulin receptor) (A2MR) (Apolipoprotein E receptor) (APOER) (CD antigen CD91) [Cleaved into: Low-density lipoprotein receptor-related protein 1 85 kDa subunit (LRP-85); Low-density lipoprotein receptor-related protein 1 515 kDa subunit (LRP-515); Low-density lipoprotein receptor-related protein 1 intracellular domain (L…	LRP1 A2MR APR	Homo sapiens (Human)	4544
PRIO_HUMAN	Protein	P04156	PRIO_HUMAN	Major prion protein (PrP) (ASCR) (PrP27-30) (PrP33-35C) (CD antigen CD230)	PRNP ALTPRP PRIP PRP	Homo sapiens (Human)	253
GANAB_HUMAN	Protein	Q14697	GANAB_HUMAN	Neutral alpha-glucosidase AB (EC 3.2.1.207) (Alpha-glucosidase 2) (Glucosidase II subunit alpha)	GANAB G2AN KIAA0088	Homo sapiens (Human)	944
MAMC2_HUMAN	Protein	Q7Z304	MAMC2_HUMAN	MAM domain-containing protein 2 (MAM domain-containing proteoglycan) (Mamcan)	MAMDC2	Homo sapiens (Human)	686
COCA1_HUMAN	Protein	Q99715	COCA1_HUMAN	Collagen alpha-1(XII) chain	COL12A1 COL12A1L	Homo sapiens (Human)	3063
GNAI2_HUMAN	Protein	P04899	GNAI2_HUMAN	Guanine nucleotide-binding protein G(i) subunit alpha-2 (Adenylate cyclase-inhibiting G alpha protein)	GNAI2 GNAI2B	Homo sapiens (Human)	355
NUCL_HUMAN	Protein	P19338	NUCL_HUMAN	Nucleolin (Protein C23)	NCL	Homo sapiens (Human)	710
CNDP1_HUMAN	Protein	Q96KN2	CNDP1_HUMAN	Beta-Ala-His dipeptidase (EC 3.4.13.20) (CNDP dipeptidase 1) (Carnosine dipeptidase 1) (Glutamate carboxypeptidase-like protein 2) (Serum carnosinase)	CNDP1 CN1 CPGL2 UNQ1915/PRO4380	Homo sapiens (Human)	507
LTBP4_HUMAN	Protein	Q8N2S1	LTBP4_HUMAN	Latent-transforming growth factor beta-binding protein 4 (LTBP-4)	LTBP4	Homo sapiens (Human)	1624
SPB12_HUMAN	Protein	Q96P63	SPB12_HUMAN	Serpin B12	SERPINB12	Homo sapiens (Human)	405
CO5A1_HUMAN	Protein	P20908	CO5A1_HUMAN	Collagen alpha-1(V) chain	COL5A1	Homo sapiens (Human)	1838
NID1_HUMAN	Protein	P14543	NID1_HUMAN	Nidogen-1 (NID-1) (Entactin)	NID1 NID	Homo sapiens (Human)	1247
LUM_HUMAN	Protein	P51884	LUM_HUMAN	Lumican (Keratan sulfate proteoglycan lumican) (KSPG lumican)	LUM LDC SLRR2D	Homo sapiens (Human)	338
PRDX6_HUMAN	Protein	P30041	PRDX6_HUMAN	Peroxiredoxin-6 (EC 1.11.1.27) (1-Cys peroxiredoxin) (1-Cys PRX) (24 kDa protein) (Acidic calcium-independent phospholipase A2) (aiPLA2) (EC 3.1.1.4) (Antioxidant protein 2) (Glutathione-dependent peroxiredoxin) (Liver 2D page spot 40) (Lysophosphatidylcholine acyltransferase 5) (LPC acyltransferase 5) (LPCAT-5) (Lyso-PC acyltransferase 5) (EC 2.3.1.23) (Non-selenium glutathione peroxidase) (NSGP…	PRDX6 AOP2 KIAA0106	Homo sapiens (Human)	224
PLSL_HUMAN	Protein	P13796	PLSL_HUMAN	Plastin-2 (L-plastin) (LC64P) (Lymphocyte cytosolic protein 1) (LCP-1)	LCP1 PLS2	Homo sapiens (Human)	627
PLVAP_HUMAN	Protein	Q9BX97	PLVAP_HUMAN	Plasmalemma vesicle-associated protein (Fenestrated endothelial-linked structure protein) (Plasmalemma vesicle protein 1) (PV-1)	PLVAP FELS PV1	Homo sapiens (Human)	442
PA2G4_HUMAN	Protein	Q9UQ80	PA2G4_HUMAN	Proliferation-associated protein 2G4 (Cell cycle protein p38-2G4 homolog) (hG4-1) (ErbB3-binding protein 1)	PA2G4 EBP1	Homo sapiens (Human)	394
SPTN1_HUMAN	Protein	Q13813	SPTN1_HUMAN	Spectrin alpha chain, non-erythrocytic 1 (Alpha-II spectrin) (Fodrin alpha chain) (Spectrin, non-erythroid alpha subunit)	SPTAN1 NEAS SPTA2	Homo sapiens (Human)	2472
6PGD_HUMAN	Protein	P52209	6PGD_HUMAN	6-phosphogluconate dehydrogenase, decarboxylating (EC 1.1.1.44)	PGD PGDH	Homo sapiens (Human)	483
PUR6_HUMAN	Protein	P22234	PUR6_HUMAN	Bifunctional phosphoribosylaminoimidazole carboxylase/phosphoribosylaminoimidazole succinocarboxamide synthetase (PAICS) [Includes: Phosphoribosylaminoimidazole carboxylase (EC 4.1.1.21) (AIR carboxylase) (AIRC); Phosphoribosylaminoimidazole succinocarboxamide synthetase (EC 6.3.2.6) (SAICAR synthetase)]	PAICS ADE2 AIRC PAIS	Homo sapiens (Human)	425
COEA1_HUMAN	Protein	Q05707	COEA1_HUMAN	Collagen alpha-1(XIV) chain (Undulin)	COL14A1 UND	Homo sapiens (Human)	1796
K2C7_HUMAN	Protein	P08729	K2C7_HUMAN	Keratin, type II cytoskeletal 7 (Cytokeratin-7) (CK-7) (Keratin-7) (K7) (Sarcolectin) (Type-II keratin Kb7)	KRT7 SCL	Homo sapiens (Human)	469
GLOD4_HUMAN	Protein	Q9HC38	GLOD4_HUMAN	Glyoxalase domain-containing protein 4	GLOD4 C17orf25 CGI-150 My027	Homo sapiens (Human)	313
PCYOX_HUMAN	Protein	Q9UHG3	PCYOX_HUMAN	Prenylcysteine oxidase 1 (EC 1.8.3.5) (Prenylcysteine lyase)	PCYOX1 KIAA0908 PCL1 UNQ597/PRO1183	Homo sapiens (Human)	505
K2C8_HUMAN	Protein	P05787	K2C8_HUMAN	Keratin, type II cytoskeletal 8 (Cytokeratin-8) (CK-8) (Keratin-8) (K8) (Type-II keratin Kb8)	KRT8 CYK8	Homo sapiens (Human)	483
FSCN1_HUMAN	Protein	Q16658	FSCN1_HUMAN	Fascin (55 kDa actin-bundling protein) (Singed-like protein) (p55)	FSCN1 FAN1 HSN SNL	Homo sapiens (Human)	493
MATN1_HUMAN	Protein	P21941	MATN1_HUMAN	Cartilage matrix protein (Matrilin-1)	MATN1 CMP CRTM	Homo sapiens (Human)	496
NSF_HUMAN	Protein	P46459	NSF_HUMAN	Vesicle-fusing ATPase (EC 3.6.4.6) (N-ethylmaleimide-sensitive fusion protein) (NEM-sensitive fusion protein) (Vesicular-fusion protein NSF)	NSF	Homo sapiens (Human)	744
C1TC_HUMAN	Protein	P11586	C1TC_HUMAN	C-1-tetrahydrofolate synthase, cytoplasmic (C1-THF synthase) (Epididymis secretory sperm binding protein) [Cleaved into: C-1-tetrahydrofolate synthase, cytoplasmic, N-terminally processed] [Includes: Methylenetetrahydrofolate dehydrogenase (EC 1.5.1.5); Methenyltetrahydrofolate cyclohydrolase (EC 3.5.4.9); Formyltetrahydrofolate synthetase (EC 6.3.4.3)]	MTHFD1 MTHFC MTHFD	Homo sapiens (Human)	935
GLCNE_HUMAN	Protein	Q9Y223	GLCNE_HUMAN	Bifunctional UDP-N-acetylglucosamine 2-epimerase/N-acetylmannosamine kinase (UDP-GlcNAc-2-epimerase/ManAc kinase) [Includes: UDP-N-acetylglucosamine 2-epimerase (hydrolyzing) (EC 3.2.1.183) (UDP-GlcNAc-2-epimerase) (Uridine diphosphate-N-acetylglucosamine-2-epimerase); N-acetylmannosamine kinase (EC 2.7.1.60) (ManAc kinase)]	GNE GLCNE	Homo sapiens (Human)	722
HNRPU_HUMAN	Protein	Q00839	HNRPU_HUMAN	Heterogeneous nuclear ribonucleoprotein U (hnRNP U) (GRIP120) (Nuclear p120 ribonucleoprotein) (Scaffold-attachment factor A) (SAF-A) (p120) (pp120)	HNRNPU C1orf199 HNRPU SAFA U21.1	Homo sapiens (Human)	825
SORCN_HUMAN	Protein	P30626	SORCN_HUMAN	Sorcin (22 kDa protein) (CP-22) (CP22) (V19)	SRI	Homo sapiens (Human)	198
MGAT1_HUMAN	Protein	P26572	MGAT1_HUMAN	Alpha-1,3-mannosyl-glycoprotein 2-beta-N-acetylglucosaminyltransferase (EC 2.4.1.101) (N-glycosyl-oligosaccharide-glycoprotein N-acetylglucosaminyltransferase I) (GNT-I) (GlcNAc-T I)	MGAT1 GGNT1 GLCT1 GLYT1 MGAT	Homo sapiens (Human)	445
AHNK_HUMAN	Protein	Q09666	AHNK_HUMAN	Neuroblast differentiation-associated protein AHNAK (Desmoyokin)	AHNAK PM227	Homo sapiens (Human)	5890
OTUB1_HUMAN	Protein	Q96FW1	OTUB1_HUMAN	Ubiquitin thioesterase OTUB1 (EC 3.4.19.12) (Deubiquitinating enzyme OTUB1) (OTU domain-containing ubiquitin aldehyde-binding protein 1) (Otubain-1) (hOTU1) (Ubiquitin-specific-processing protease OTUB1)	OTUB1 OTB1 OTU1 HSPC263	Homo sapiens (Human)	271
PDC10_HUMAN	Protein	Q9BUL8	PDC10_HUMAN	Programmed cell death protein 10 (Cerebral cavernous malformations 3 protein) (TF-1 cell apoptosis-related protein 15)	PDCD10 CCM3 TFAR15	Homo sapiens (Human)	212
GARS_HUMAN	Protein	P41250	GARS_HUMAN	Glycine--tRNA ligase (EC 6.1.1.14) (Diadenosine tetraphosphate synthetase) (Ap4A synthetase) (EC 2.7.7.-) (Glycyl-tRNA synthetase) (GlyRS) (Glycyl-tRNA synthetase 1)	GARS1 GARS	Homo sapiens (Human)	739
LG3BP_HUMAN	Protein	Q08380	LG3BP_HUMAN	Galectin-3-binding protein (Basement membrane autoantigen p105) (Lectin galactoside-binding soluble 3-binding protein) (Mac-2-binding protein) (MAC2BP) (Mac-2 BP) (Tumor-associated antigen 90K)	LGALS3BP M2BP	Homo sapiens (Human)	585
GALK2_HUMAN	Protein	Q01415	GALK2_HUMAN	N-acetylgalactosamine kinase (EC 2.7.1.157) (GalNAc kinase) (Galactokinase 2)	GALK2 GK2	Homo sapiens (Human)	458
AMPD2_HUMAN	Protein	Q01433	AMPD2_HUMAN	AMP deaminase 2 (EC 3.5.4.6) (AMP deaminase isoform L)	AMPD2	Homo sapiens (Human)	825
MINP1_HUMAN	Protein	Q9UNW1	MINP1_HUMAN	Multiple inositol polyphosphate phosphatase 1 (EC 3.1.3.62) (2,3-bisphosphoglycerate 3-phosphatase) (2,3-BPG phosphatase) (EC 3.1.3.80) (Inositol (1,3,4,5)-tetrakisphosphate 3-phosphatase) (Ins(1,3,4,5)P(4) 3-phosphatase)	MINPP1 MIPP UNQ900/PRO1917	Homo sapiens (Human)	487
CAD11_HUMAN	Protein	P55287	CAD11_HUMAN	Cadherin-11 (OSF-4) (Osteoblast cadherin) (OB-cadherin)	CDH11	Homo sapiens (Human)	796
FUBP1_HUMAN	Protein	Q96AE4	FUBP1_HUMAN	Far upstream element-binding protein 1 (FBP) (FUSE-binding protein 1) (DNA helicase V) (hDH V)	FUBP1	Homo sapiens (Human)	644
MATN2_HUMAN	Protein	O00339	MATN2_HUMAN	Matrilin-2	MATN2 UNQ193/PRO219	Homo sapiens (Human)	956
PDC6I_HUMAN	Protein	Q8WUM4	PDC6I_HUMAN	Programmed cell death 6-interacting protein (PDCD6-interacting protein) (ALG-2-interacting protein 1) (ALG-2-interacting protein X) (Hp95)	PDCD6IP AIP1 ALIX KIAA1375	Homo sapiens (Human)	868
PFKAP_HUMAN	Protein	Q01813	PFKAP_HUMAN	ATP-dependent 6-phosphofructokinase, platelet type (ATP-PFK) (PFK-P) (EC 2.7.1.11) (6-phosphofructokinase type C) (Phosphofructo-1-kinase isozyme C) (PFK-C) (Phosphohexokinase)	PFKP PFKF	Homo sapiens (Human)	784
KPYR_HUMAN	Protein	P30613	KPYR_HUMAN	Pyruvate kinase PKLR (EC 2.7.1.40) (Pyruvate kinase 1) (Pyruvate kinase isozymes L/R) (R-type/L-type pyruvate kinase) (Red cell/liver pyruvate kinase)	PKLR PK1 PKL	Homo sapiens (Human)	574
TCPE_HUMAN	Protein	P48643	TCPE_HUMAN	T-complex protein 1 subunit epsilon (TCP-1-epsilon) (CCT-epsilon)	CCT5 CCTE KIAA0098	Homo sapiens (Human)	541
TKT_HUMAN	Protein	P29401	TKT_HUMAN	Transketolase (TK) (EC 2.2.1.1)	TKT	Homo sapiens (Human)	623
MP2K1_HUMAN	Protein	Q02750	MP2K1_HUMAN	Dual specificity mitogen-activated protein kinase kinase 1 (MAP kinase kinase 1) (MAPKK 1) (MKK1) (EC 2.7.12.2) (ERK activator kinase 1) (MAPK/ERK kinase 1) (MEK 1)	MAP2K1 MEK1 PRKMK1	Homo sapiens (Human)	393
HOOK3_HUMAN	Protein	Q86VS8	HOOK3_HUMAN	Protein Hook homolog 3 (h-hook3) (hHK3)	HOOK3	Homo sapiens (Human)	718
MK03_HUMAN	Protein	P27361	MK03_HUMAN	Mitogen-activated protein kinase 3 (MAP kinase 3) (MAPK 3) (EC 2.7.11.24) (ERT2) (Extracellular signal-regulated kinase 1) (ERK-1) (Insulin-stimulated MAP2 kinase) (MAP kinase isoform p44) (p44-MAPK) (Microtubule-associated protein 2 kinase) (p44-ERK1)	MAPK3 ERK1 PRKM3	Homo sapiens (Human)	379
STAB1_HUMAN	Protein	Q9NY15	STAB1_HUMAN	Stabilin-1 (Fasciclin, EGF-like, laminin-type EGF-like and link domain-containing scavenger receptor 1) (FEEL-1) (MS-1 antigen)	STAB1 FEEL1 KIAA0246	Homo sapiens (Human)	2570
COR1B_HUMAN	Protein	Q9BR76	COR1B_HUMAN	Coronin-1B (Coronin-2)	CORO1B	Homo sapiens (Human)	489
PSDE_HUMAN	Protein	O00487	PSDE_HUMAN	26S proteasome non-ATPase regulatory subunit 14 (EC 3.4.19.-) (26S proteasome regulatory subunit RPN11) (26S proteasome-associated PAD1 homolog 1)	PSMD14 POH1	Homo sapiens (Human)	310
AEBP1_HUMAN	Protein	Q8IUX7	AEBP1_HUMAN	Adipocyte enhancer-binding protein 1 (AE-binding protein 1) (Aortic carboxypeptidase-like protein)	AEBP1 ACLP	Homo sapiens (Human)	1158
CO6A2_HUMAN	Protein	P12110	CO6A2_HUMAN	Collagen alpha-2(VI) chain	COL6A2	Homo sapiens (Human)	1019
TWF2_HUMAN	Protein	Q6IBS0	TWF2_HUMAN	Twinfilin-2 (A6-related protein) (hA6RP) (Protein tyrosine kinase 9-like) (Twinfilin-1-like protein)	TWF2 PTK9L MSTP011	Homo sapiens (Human)	349
SEPT9_HUMAN	Protein	Q9UHD8	SEPT9_HUMAN	Septin-9 (MLL septin-like fusion protein MSF-A) (MLL septin-like fusion protein) (Ovarian/Breast septin) (Ov/Br septin) (Septin D1)	SEPTIN9 KIAA0991 MSF SEPT9	Homo sapiens (Human)	586
VAT1_HUMAN	Protein	Q99536	VAT1_HUMAN	Synaptic vesicle membrane protein VAT-1 homolog (EC 1.-.-.-)	VAT1	Homo sapiens (Human)	393
CALX_HUMAN	Protein	P27824	CALX_HUMAN	Calnexin (IP90) (Major histocompatibility complex class I antigen-binding protein p88) (p90)	CANX	Homo sapiens (Human)	592
ATL2_HUMAN	Protein	Q86TH1	ATL2_HUMAN	ADAMTS-like protein 2 (ADAMTSL-2)	ADAMTSL2 KIAA0605	Homo sapiens (Human)	951
PRDX3_HUMAN	Protein	P30048	PRDX3_HUMAN	Thioredoxin-dependent peroxide reductase, mitochondrial (EC 1.11.1.24) (Antioxidant protein 1) (AOP-1) (HBC189) (Peroxiredoxin III) (Prx-III) (Peroxiredoxin-3) (Protein MER5 homolog) (Thioredoxin-dependent peroxiredoxin 3)	PRDX3 AOP1	Homo sapiens (Human)	256
PK3CG_HUMAN	Protein	P48736	PK3CG_HUMAN	Phosphatidylinositol 4,5-bisphosphate 3-kinase catalytic subunit gamma isoform (PI3-kinase subunit gamma) (PI3K-gamma) (PI3Kgamma) (PtdIns-3-kinase subunit gamma) (EC 2.7.1.137) (EC 2.7.1.153) (EC 2.7.1.154) (Phosphatidylinositol 4,5-bisphosphate 3-kinase 110 kDa catalytic subunit gamma) (PtdIns-3-kinase subunit p110-gamma) (p110gamma) (Phosphoinositide-3-kinase catalytic gamma polypeptide) (Seri…	PIK3CG	Homo sapiens (Human)	1102
RELN_HUMAN	Protein	P78509	RELN_HUMAN	Reelin (EC 3.4.21.-)	RELN	Homo sapiens (Human)	3460
VWF_HUMAN	Protein	P04275	VWF_HUMAN	von Willebrand factor (vWF) [Cleaved into: von Willebrand antigen 2 (von Willebrand antigen II)]	VWF F8VWF	Homo sapiens (Human)	2813
CSTN1_HUMAN	Protein	O94985	CSTN1_HUMAN	Calsyntenin-1 (Alcadein-alpha) (Alc-alpha) (Alzheimer-related cadherin-like protein) (Non-classical cadherin XB31alpha) [Cleaved into: Soluble Alc-alpha (SAlc-alpha); CTF1-alpha (C-terminal fragment 1-alpha)]	CLSTN1 CS1 KIAA0911	Homo sapiens (Human)	981
T132C_HUMAN	Protein	Q8N3T6	T132C_HUMAN	Transmembrane protein 132C	TMEM132C	Homo sapiens (Human)	1108
NOTC1_HUMAN	Protein	P46531	NOTC1_HUMAN	Neurogenic locus notch homolog protein 1 (Notch 1) (hN1) (Translocation-associated notch protein TAN-1) [Cleaved into: Notch 1 extracellular truncation (NEXT); Notch 1 intracellular domain (NICD)]	NOTCH1 TAN1	Homo sapiens (Human)	2555
HSP74_HUMAN	Protein	P34932	HSP74_HUMAN	Heat shock 70 kDa protein 4 (HSP70RY) (Heat shock 70-related protein APG-2)	HSPA4 APG2	Homo sapiens (Human)	840
CALR_HUMAN	Protein	P27797	CALR_HUMAN	Calreticulin (CRP55) (Calregulin) (Endoplasmic reticulum resident protein 60) (ERp60) (HACBP) (grp60)	CALR CRTC	Homo sapiens (Human)	417
MYL9_HUMAN	Protein	P24844	MYL9_HUMAN	Myosin regulatory light polypeptide 9 (20 kDa myosin light chain) (LC20) (MLC-2C) (Myosin RLC) (Myosin regulatory light chain 2, smooth muscle isoform) (Myosin regulatory light chain 9) (Myosin regulatory light chain MRLC1)	MYL9 MLC2 MRLC1 MYRL2	Homo sapiens (Human)	172
STXB2_HUMAN	Protein	Q15833	STXB2_HUMAN	Syntaxin-binding protein 2 (Protein unc-18 homolog 2) (Unc18-2) (Protein unc-18 homolog B) (Unc-18B)	STXBP2 UNC18B	Homo sapiens (Human)	593
CHSP1_HUMAN	Protein	Q9Y2V2	CHSP1_HUMAN	Calcium-regulated heat-stable protein 1 (Calcium-regulated heat-stable protein of 24 kDa) (CRHSP-24)	CARHSP1	Homo sapiens (Human)	147
TSP3_HUMAN	Protein	P49746	TSP3_HUMAN	Thrombospondin-3	THBS3 TSP3	Homo sapiens (Human)	956
FLNC_HUMAN	Protein	Q14315	FLNC_HUMAN	Filamin-C (FLN-C) (FLNc) (ABP-280-like protein) (ABP-L) (Actin-binding-like protein) (Filamin-2) (Gamma-filamin)	FLNC ABPL FLN2	Homo sapiens (Human)	2725
FHOD1_HUMAN	Protein	Q9Y613	FHOD1_HUMAN	FH1/FH2 domain-containing protein 1 (Formin homolog overexpressed in spleen 1) (FHOS) (Formin homology 2 domain-containing protein 1)	FHOD1 FHOS FHOS1	Homo sapiens (Human)	1164
NPTX1_HUMAN	Protein	Q15818	NPTX1_HUMAN	Neuronal pentraxin-1 (NP1) (Neuronal pentraxin I) (NP-I)	NPTX1	Homo sapiens (Human)	432
TICN2_HUMAN	Protein	Q92563	TICN2_HUMAN	Testican-2 (SPARC/osteonectin, CWCV, and Kazal-like domains proteoglycan 2)	SPOCK2 KIAA0275 TICN2 UNQ269/PRO306	Homo sapiens (Human)	424
NOTC2_HUMAN	Protein	Q04721	NOTC2_HUMAN	Neurogenic locus notch homolog protein 2 (Notch 2) (hN2) [Cleaved into: Notch 2 extracellular truncation (N2ECD); Notch 2 intracellular domain (N2ICD)]	NOTCH2	Homo sapiens (Human)	2471
GFPT1_HUMAN	Protein	Q06210	GFPT1_HUMAN	Glutamine--fructose-6-phosphate aminotransferase [isomerizing] 1 (EC 2.6.1.16) (D-fructose-6-phosphate amidotransferase 1) (Glutamine:fructose-6-phosphate amidotransferase 1) (GFAT 1) (GFAT1) (Hexosephosphate aminotransferase 1)	GFPT1 GFAT GFPT	Homo sapiens (Human)	699
LEGL_HUMAN	Protein	Q3ZCW2	LEGL_HUMAN	Galectin-related protein (Galectin-like protein) (Lectin galactoside-binding-like protein)	LGALSL GRP HSPC159	Homo sapiens (Human)	172
MYPT1_HUMAN	Protein	O14974	MYPT1_HUMAN	Protein phosphatase 1 regulatory subunit 12A (Myosin phosphatase-targeting subunit 1) (Myosin phosphatase target subunit 1) (Protein phosphatase myosin-binding subunit)	PPP1R12A MBS MYPT1	Homo sapiens (Human)	1030
IGDC4_HUMAN	Protein	Q8TDY8	IGDC4_HUMAN	Immunoglobulin superfamily DCC subclass member 4 (Neighbor of punc e11) (Protein DDM36) (hDDM36)	IGDCC4 DDM36 KIAA1628 NOPE	Homo sapiens (Human)	1250
CUL4B_HUMAN	Protein	Q13620	CUL4B_HUMAN	Cullin-4B (CUL-4B)	CUL4B KIAA0695	Homo sapiens (Human)	913
DP13A_HUMAN	Protein	Q9UKG1	DP13A_HUMAN	DCC-interacting protein 13-alpha (Dip13-alpha) (Adapter protein containing PH domain, PTB domain and leucine zipper motif 1)	APPL1 APPL DIP13A KIAA1428	Homo sapiens (Human)	709
SYAC_HUMAN	Protein	P49588	SYAC_HUMAN	Alanine--tRNA ligase, cytoplasmic (EC 6.1.1.7) (Alanyl-tRNA synthetase) (AlaRS) (Renal carcinoma antigen NY-REN-42)	AARS1 AARS	Homo sapiens (Human)	968
NIBA2_HUMAN	Protein	Q96TA1	NIBA2_HUMAN	Protein Niban 2 (Meg-3) (Melanoma invasion by ERK) (MINERVA) (Niban-like protein 1) (Protein FAM129B)	NIBAN2 C9orf88 FAM129B	Homo sapiens (Human)	746
IMB1_HUMAN	Protein	Q14974	IMB1_HUMAN	Importin subunit beta-1 (Importin-90) (Karyopherin subunit beta-1) (Nuclear factor p97) (Pore targeting complex 97 kDa subunit) (PTAC97)	KPNB1 NTF97	Homo sapiens (Human)	876
PTN11_HUMAN	Protein	Q06124	PTN11_HUMAN	Tyrosine-protein phosphatase non-receptor type 11 (EC 3.1.3.48) (Protein-tyrosine phosphatase 1D) (PTP-1D) (Protein-tyrosine phosphatase 2C) (PTP-2C) (SH-PTP2) (SHP-2) (Shp2) (SH-PTP3)	PTPN11 PTP2C SHPTP2	Homo sapiens (Human)	593
ADK_HUMAN	Protein	P55263	ADK_HUMAN	Adenosine kinase (AK) (EC 2.7.1.20) (Adenosine 5'-phosphotransferase)	ADK	Homo sapiens (Human)	362
IPO7_HUMAN	Protein	O95373	IPO7_HUMAN	Importin-7 (Imp7) (Ran-binding protein 7) (RanBP7)	IPO7 RANBP7	Homo sapiens (Human)	1038
TBB1_HUMAN	Protein	Q9H4B7	TBB1_HUMAN	Tubulin beta-1 chain	TUBB1	Homo sapiens (Human)	451
CLAP1_HUMAN	Protein	Q7Z460	CLAP1_HUMAN	CLIP-associating protein 1 (Cytoplasmic linker-associated protein 1) (Multiple asters homolog 1) (Protein Orbit homolog 1) (hOrbit1)	CLASP1 KIAA0622 MAST1	Homo sapiens (Human)	1538
K1C19_HUMAN	Protein	P08727	K1C19_HUMAN	Keratin, type I cytoskeletal 19 (Cytokeratin-19) (CK-19) (Keratin-19) (K19)	KRT19	Homo sapiens (Human)	400
SERC_HUMAN	Protein	Q9Y617	SERC_HUMAN	Phosphoserine aminotransferase (EC 2.6.1.52) (Phosphohydroxythreonine aminotransferase) (PSAT)	PSAT1 PSA	Homo sapiens (Human)	370
PRS6A_HUMAN	Protein	P17980	PRS6A_HUMAN	26S proteasome regulatory subunit 6A (26S proteasome AAA-ATPase subunit RPT5) (Proteasome 26S subunit ATPase 3) (Proteasome subunit P50) (Tat-binding protein 1) (TBP-1)	PSMC3 TBP1	Homo sapiens (Human)	439
KT33B_HUMAN	Protein	Q14525	KT33B_HUMAN	Keratin, type I cuticular Ha3-II (Hair keratin, type I Ha3-II) (Keratin-33B) (K33B)	KRT33B HHA3-II HKA3B KRTHA3B	Homo sapiens (Human)	404
PKDCC_HUMAN	Protein	Q504Y2	PKDCC_HUMAN	Extracellular tyrosine-protein kinase PKDCC (EC 2.7.10.2) (Protein kinase domain-containing protein, cytoplasmic) (Protein kinase-like protein SgK493) (Sugen kinase 493) (Vertebrate lonesome kinase)	PKDCC SGK493 VLK	Homo sapiens (Human)	493
PDIA6_HUMAN	Protein	Q15084	PDIA6_HUMAN	Protein disulfide-isomerase A6 (EC 5.3.4.1) (Endoplasmic reticulum protein 5) (ER protein 5) (ERp5) (Protein disulfide isomerase P5) (Thioredoxin domain-containing protein 7)	PDIA6 ERP5 P5 TXNDC7	Homo sapiens (Human)	440
BIN1_HUMAN	Protein	O00499	BIN1_HUMAN	Myc box-dependent-interacting protein 1 (Amphiphysin II) (Amphiphysin-like protein) (Box-dependent myc-interacting protein 1) (Bridging integrator 1)	BIN1 AMPHL	Homo sapiens (Human)	593
RAB1A_HUMAN	Protein	P62820	RAB1A_HUMAN	Ras-related protein Rab-1A (EC 3.6.5.2) (YPT1-related protein)	RAB1A RAB1	Homo sapiens (Human)	205
SRCRL_HUMAN	Protein	A1L4H1	SRCRL_HUMAN	Soluble scavenger receptor cysteine-rich domain-containing protein SSC5D (Soluble scavenger protein with 5 SRCR domains) (SSc5D)	SSC5D	Homo sapiens (Human)	1573
OXSR1_HUMAN	Protein	O95747	OXSR1_HUMAN	Serine/threonine-protein kinase OSR1 (EC 2.7.11.1) (Oxidative stress-responsive 1 protein)	OXSR1 KIAA1101 OSR1	Homo sapiens (Human)	527
DYHC1_HUMAN	Protein	Q14204	DYHC1_HUMAN	Cytoplasmic dynein 1 heavy chain 1 (Cytoplasmic dynein heavy chain 1) (Dynein heavy chain, cytosolic)	DYNC1H1 DHC1 DNCH1 DNCL DNECL DYHC KIAA0325	Homo sapiens (Human)	4646
PEPD_HUMAN	Protein	P12955	PEPD_HUMAN	Xaa-Pro dipeptidase (X-Pro dipeptidase) (EC 3.4.13.9) (Imidodipeptidase) (Peptidase D) (Proline dipeptidase) (Prolidase)	PEPD PRD	Homo sapiens (Human)	493
UN13D_HUMAN	Protein	Q70J99	UN13D_HUMAN	Protein unc-13 homolog D (Munc13-4)	UNC13D	Homo sapiens (Human)	1090
ULA1_HUMAN	Protein	Q13564	ULA1_HUMAN	NEDD8-activating enzyme E1 regulatory subunit (Amyloid beta precursor protein-binding protein 1, 59 kDa) (APP-BP1) (Amyloid protein-binding protein 1) (Proto-oncogene protein 1)	NAE1 APPBP1 HPP1	Homo sapiens (Human)	534
NOTC3_HUMAN	Protein	Q9UM47	NOTC3_HUMAN	Neurogenic locus notch homolog protein 3 (Notch 3) [Cleaved into: Notch 3 extracellular truncation; Notch 3 intracellular domain]	NOTCH3	Homo sapiens (Human)	2321
DYN3_HUMAN	Protein	Q9UQ16	DYN3_HUMAN	Dynamin-3 (EC 3.6.5.5) (Dynamin, testicular) (T-dynamin)	DNM3 KIAA0820	Homo sapiens (Human)	869
PAIRB_HUMAN	Protein	Q8NC51	SERB1_HUMAN	SERPINE1 mRNA-binding protein 1[...]	SERBP1, PAIRBP1, CGI-55	Homo sapiens (Human)	408 AA
PRDX5_HUMAN	Protein	P30044	PRDX5_HUMAN	Peroxiredoxin-5, mitochondrial (EC 1.11.1.24) (Alu corepressor 1) (Antioxidant enzyme B166) (AOEB166) (Liver tissue 2D-page spot 71B) (PLP) (Peroxiredoxin V) (Prx-V) (Peroxisomal antioxidant enzyme) (TPx type VI) (Thioredoxin peroxidase PMP20) (Thioredoxin-dependent peroxiredoxin 5)	PRDX5 ACR1 SBBI10	Homo sapiens (Human)	214
IQGA1_HUMAN	Protein	P46940	IQGA1_HUMAN	Ras GTPase-activating-like protein IQGAP1 (p195)	IQGAP1 KIAA0051	Homo sapiens (Human)	1657
XRCC5_HUMAN	Protein	P13010	XRCC5_HUMAN	X-ray repair cross-complementing protein 5 (EC 3.6.4.-) (86 kDa subunit of Ku antigen) (ATP-dependent DNA helicase 2 subunit 2) (ATP-dependent DNA helicase II 80 kDa subunit) (CTC box-binding factor 85 kDa subunit) (CTC85) (CTCBF) (DNA repair protein XRCC5) (Ku80) (Ku86) (Lupus Ku autoantigen protein p86) (Nuclear factor IV) (Thyroid-lupus autoantigen) (TLAA) (X-ray repair complementing defective…	XRCC5 G22P2	Homo sapiens (Human)	732
COMP_HUMAN	Protein	P49747	COMP_HUMAN	Cartilage oligomeric matrix protein (COMP) (Thrombospondin-5) (TSP5)	COMP	Homo sapiens (Human)	757
CPSM_HUMAN	Protein	P31327	CPSM_HUMAN	Carbamoyl-phosphate synthase [ammonia], mitochondrial (EC 6.3.4.16) (Carbamoyl-phosphate synthetase I) (CPSase I)	CPS1	Homo sapiens (Human)	1500
DCTN1_HUMAN	Protein	Q14203	DCTN1_HUMAN	Dynactin subunit 1 (150 kDa dynein-associated polypeptide) (DAP-150) (DP-150) (p135) (p150-glued)	DCTN1	Homo sapiens (Human)	1278
PXDN_HUMAN	Protein	Q92626	PXDN_HUMAN	Peroxidasin homolog (EC 1.11.2.-) (Melanoma-associated antigen MG50) (Peroxidasin 1) (hsPxd01) (Vascular peroxidase 1) (p53-responsive gene 2 protein) [Cleaved into: PXDN active fragment]	PXDN KIAA0230 MG50 PRG2 PXD01 VPO VPO1	Homo sapiens (Human)	1479
SNX6_HUMAN	Protein	Q9UNH7	SNX6_HUMAN	Sorting nexin-6 (TRAF4-associated factor 2) [Cleaved into: Sorting nexin-6, N-terminally processed]	SNX6	Homo sapiens (Human)	406
SCFD1_HUMAN	Protein	Q8WVM8	SCFD1_HUMAN	Sec1 family domain-containing protein 1 (SLY1 homolog) (Sly1p) (Syntaxin-binding protein 1-like 2)	SCFD1 C14orf163 KIAA0917 STXBP1L2 FKSG23	Homo sapiens (Human)	642
PSMD1_HUMAN	Protein	Q99460	PSMD1_HUMAN	26S proteasome non-ATPase regulatory subunit 1 (26S proteasome regulatory subunit RPN2) (26S proteasome regulatory subunit S1) (26S proteasome subunit p112)	PSMD1	Homo sapiens (Human)	953
NIBA1_HUMAN	Protein	Q9BZQ8	NIBA1_HUMAN	Protein Niban 1 (Cell growth-inhibiting gene 39 protein) (Protein FAM129A)	NIBAN1 C1orf24 FAM129A NIBAN GIG39	Homo sapiens (Human)	928
EHD3_HUMAN	Protein	Q9NZN3	EHD3_HUMAN	EH domain-containing protein 3 (PAST homolog 3)	EHD3 EHD2 PAST3	Homo sapiens (Human)	535
COR1C_HUMAN	Protein	Q9ULV4	COR1C_HUMAN	Coronin-1C (Coronin-3) (hCRNN4)	CORO1C CRN2 CRNN4	Homo sapiens (Human)	474
TSP1_HUMAN	Protein	P07996	TSP1_HUMAN	Thrombospondin-1 (Glycoprotein G)	THBS1 TSP TSP1	Homo sapiens (Human)	1170
MATN3_HUMAN	Protein	O15232	MATN3_HUMAN	Matrilin-3	MATN3	Homo sapiens (Human)	486
PTPRC_HUMAN	Protein	P08575	PTPRC_HUMAN	Receptor-type tyrosine-protein phosphatase C (EC 3.1.3.48) (Leukocyte common antigen) (L-CA) (T200) (CD antigen CD45)	PTPRC CD45	Homo sapiens (Human)	1306
PGK1_HUMAN	Protein	P00558	PGK1_HUMAN	Phosphoglycerate kinase 1 (EC 2.7.2.3) (Cell migration-inducing gene 10 protein) (Primer recognition protein 2) (PRP 2)	PGK1 PGKA MIG10 OK/SW-cl.110	Homo sapiens (Human)	417
UBA1_HUMAN	Protein	P22314	UBA1_HUMAN	Ubiquitin-like modifier-activating enzyme 1 (EC 6.2.1.45) (Protein A1S9) (Ubiquitin-activating enzyme E1)	UBA1 A1S9T UBE1	Homo sapiens (Human)	1058
PTPRS_HUMAN	Protein	Q13332	PTPRS_HUMAN	Receptor-type tyrosine-protein phosphatase S (R-PTP-S) (EC 3.1.3.48) (Receptor-type tyrosine-protein phosphatase sigma) (R-PTP-sigma)	PTPRS	Homo sapiens (Human)	1948
AT1A3_HUMAN	Protein	P13637	AT1A3_HUMAN	Sodium/potassium-transporting ATPase subunit alpha-3 (Na(+)/K(+) ATPase alpha-3 subunit) (EC 7.2.2.13) (Na(+)/K(+) ATPase alpha(III) subunit) (Sodium pump subunit alpha-3)	ATP1A3	Homo sapiens (Human)	1013
S10AB_HUMAN	Protein	P31949	S10AB_HUMAN	Protein S100-A11 (Calgizzarin) (Metastatic lymph node gene 70 protein) (MLN 70) (Protein S100-C) (S100 calcium-binding protein A11) [Cleaved into: Protein S100-A11, N-terminally processed]	S100A11 MLN70 S100C	Homo sapiens (Human)	105
AL1L1_HUMAN	Protein	O75891	AL1L1_HUMAN	Cytosolic 10-formyltetrahydrofolate dehydrogenase (10-FTHFDH) (FDH) (EC 1.5.1.6) (Aldehyde dehydrogenase family 1 member L1)	ALDH1L1 FTHFD	Homo sapiens (Human)	902
DCUP_HUMAN	Protein	P06132	DCUP_HUMAN	Uroporphyrinogen decarboxylase (UPD) (URO-D) (EC 4.1.1.37)	UROD	Homo sapiens (Human)	367
G6PD_HUMAN	Protein	P11413	G6PD_HUMAN	Glucose-6-phosphate 1-dehydrogenase (G6PD) (EC 1.1.1.49)	G6PD	Homo sapiens (Human)	515
LAMB1_HUMAN	Protein	P07942	LAMB1_HUMAN	Laminin subunit beta-1 (Laminin B1 chain) (Laminin-1 subunit beta) (Laminin-10 subunit beta) (Laminin-12 subunit beta) (Laminin-2 subunit beta) (Laminin-6 subunit beta) (Laminin-8 subunit beta)	LAMB1	Homo sapiens (Human)	1786
SC31A_HUMAN	Protein	O94979	SC31A_HUMAN	Protein transport protein Sec31A (ABP125) (ABP130) (SEC31-like protein 1) (SEC31-related protein A) (Web1-like protein)	SEC31A KIAA0905 SEC31L1 HSPC275 HSPC334	Homo sapiens (Human)	1220
A4_HUMAN	Protein	P05067	A4_HUMAN	Amyloid-beta precursor protein (APP) (ABPP) (APPI) (Alzheimer disease amyloid A4 protein homolog) (Alzheimer disease amyloid protein) (Amyloid precursor protein) (Amyloid-beta (A4) precursor protein) (Amyloid-beta A4 protein) (Cerebral vascular amyloid peptide) (CVAP) (PreA4) (Protease nexin-II) (PN-II) [Cleaved into: N-APP; Soluble APP-alpha (S-APP-alpha); Soluble APP-beta (S-APP-beta); C99 (Bet…	APP A4 AD1	Homo sapiens (Human)	770
ERF3A_HUMAN	Protein	P15170	ERF3A_HUMAN	Eukaryotic peptide chain release factor GTP-binding subunit ERF3A (Eukaryotic peptide chain release factor subunit 3a) (eRF3a) (EC 3.6.5.-) (G1 to S phase transition protein 1 homolog)	GSPT1 ERF3A	Homo sapiens (Human)	499
STAB2_HUMAN	Protein	Q8WWQ8	STAB2_HUMAN	Stabilin-2 (FAS1 EGF-like and X-link domain-containing adhesion molecule 2) (Fasciclin, EGF-like, laminin-type EGF-like and link domain-containing scavenger receptor 2) (FEEL-2) (Hyaluronan receptor for endocytosis) [Cleaved into: 190 kDa form stabilin-2 (190 kDa hyaluronan receptor for endocytosis)]	STAB2 FEEL2 FELL FEX2 HARE	Homo sapiens (Human)	2551
ATF6B_HUMAN	Protein	Q99941	ATF6B_HUMAN	Cyclic AMP-dependent transcription factor ATF-6 beta (cAMP-dependent transcription factor ATF-6 beta) (Activating transcription factor 6 beta) (ATF6-beta) (Protein G13) (cAMP response element-binding protein-related protein) (Creb-rp) (cAMP-responsive element-binding protein-like 1) [Cleaved into: Processed cyclic AMP-dependent transcription factor ATF-6 beta]	ATF6B CREBL1 G13	Homo sapiens (Human)	703
GUAA_HUMAN	Protein	P49915	GUAA_HUMAN	GMP synthase [glutamine-hydrolyzing] (EC 6.3.5.2) (GMP synthetase) (Glutamine amidotransferase)	GMPS	Homo sapiens (Human)	693
MATN4_HUMAN	Protein	O95460	MATN4_HUMAN	Matrilin-4	MATN4	Homo sapiens (Human)	622
K1H1_HUMAN	Protein	Q15323	K1H1_HUMAN	Keratin, type I cuticular Ha1 (Hair keratin, type I Ha1) (Keratin-31) (K31)	KRT31 HHA1 HKA1 KRTHA1	Homo sapiens (Human)	416
FBN2_HUMAN	Protein	P35556	FBN2_HUMAN	Fibrillin-2 [Cleaved into: Placensin]	FBN2	Homo sapiens (Human)	2912
BIEA_HUMAN	Protein	P53004	BIEA_HUMAN	Biliverdin reductase A (BVR A) (EC 1.3.1.24) (Biliverdin-IX alpha-reductase)	BLVRA BLVR BVR	Homo sapiens (Human)	296
UBP5_HUMAN	Protein	P45974	UBP5_HUMAN	Ubiquitin carboxyl-terminal hydrolase 5 (EC 3.4.19.12) (Deubiquitinating enzyme 5) (Isopeptidase T) (Ubiquitin thioesterase 5) (Ubiquitin-specific-processing protease 5)	USP5 ISOT	Homo sapiens (Human)	858
SVEP1_HUMAN	Protein	Q4LDE5	SVEP1_HUMAN	Sushi, von Willebrand factor type A, EGF and pentraxin domain-containing protein 1 (CCP module-containing protein 22) (Polydom) (Selectin-like osteoblast-derived protein) (SEL-OB) (Serologically defined breast cancer antigen NY-BR-38)	SVEP1 C9orf13 CCP22 SELOB	Homo sapiens (Human)	3571
PARVB_HUMAN	Protein	Q9HBI1	PARVB_HUMAN	Beta-parvin (Affixin)	PARVB CGI-56	Homo sapiens (Human)	364
PAK2_HUMAN	Protein	Q13177	PAK2_HUMAN	Serine/threonine-protein kinase PAK 2 (EC 2.7.11.1) (Gamma-PAK) (PAK65) (S6/H4 kinase) (p21-activated kinase 2) (PAK-2) (p58) [Cleaved into: PAK-2p27 (p27); PAK-2p34 (p34) (C-t-PAK2)]	PAK2	Homo sapiens (Human)	524
AGM1_HUMAN	Protein	O95394	AGM1_HUMAN	Phosphoacetylglucosamine mutase (PAGM) (EC 5.4.2.3) (Acetylglucosamine phosphomutase) (N-acetylglucosamine-phosphate mutase) (Phosphoglucomutase-3) (PGM 3)	PGM3 AGM1	Homo sapiens (Human)	542
PPP5_HUMAN	Protein	P53041	PPP5_HUMAN	Serine/threonine-protein phosphatase 5 (PP5) (EC 3.1.3.16) (Protein phosphatase T) (PP-T) (PPT)	PPP5C PPP5	Homo sapiens (Human)	499
ELOB_HUMAN	Protein	Q15370	ELOB_HUMAN	Elongin-B (EloB) (Elongin 18 kDa subunit) (RNA polymerase II transcription factor SIII subunit B) (SIII p18) (Transcription elongation factor B polypeptide 2)	ELOB TCEB2	Homo sapiens (Human)	118
RIR1_HUMAN	Protein	P23921	RIR1_HUMAN	Ribonucleoside-diphosphate reductase large subunit (EC 1.17.4.1) (Ribonucleoside-diphosphate reductase subunit M1) (Ribonucleotide reductase large subunit)	RRM1 RR1	Homo sapiens (Human)	792
PTPRD_HUMAN	Protein	P23468	PTPRD_HUMAN	Receptor-type tyrosine-protein phosphatase delta (Protein-tyrosine phosphatase delta) (R-PTP-delta) (EC 3.1.3.48)	PTPRD	Homo sapiens (Human)	1912
SPTB2_HUMAN	Protein	Q01082	SPTB2_HUMAN	Spectrin beta chain, non-erythrocytic 1 (Beta-II spectrin) (Fodrin beta chain) (Spectrin, non-erythroid beta chain 1)	SPTBN1 SPTB2	Homo sapiens (Human)	2364
UPP2_HUMAN	Protein	O95045	UPP2_HUMAN	Uridine phosphorylase 2 (UPase 2) (UrdPase 2) (EC 2.4.2.3)	UPP2	Homo sapiens (Human)	317
AT1B1_HUMAN	Protein	P05026	AT1B1_HUMAN	Sodium/potassium-transporting ATPase subunit beta-1 (Sodium/potassium-dependent ATPase subunit beta-1)	ATP1B1 ATP1B	Homo sapiens (Human)	303
LAMC1_HUMAN	Protein	P11047	LAMC1_HUMAN	Laminin subunit gamma-1 (Laminin B2 chain) (Laminin-1 subunit gamma) (Laminin-10 subunit gamma) (Laminin-11 subunit gamma) (Laminin-2 subunit gamma) (Laminin-3 subunit gamma) (Laminin-4 subunit gamma) (Laminin-6 subunit gamma) (Laminin-7 subunit gamma) (Laminin-8 subunit gamma) (Laminin-9 subunit gamma) (S-laminin subunit gamma) (S-LAM gamma)	LAMC1 LAMB2	Homo sapiens (Human)	1609
KS6A3_HUMAN	Protein	P51812	KS6A3_HUMAN	Ribosomal protein S6 kinase alpha-3 (S6K-alpha-3) (EC 2.7.11.1) (90 kDa ribosomal protein S6 kinase 3) (p90-RSK 3) (p90RSK3) (Insulin-stimulated protein kinase 1) (ISPK-1) (MAP kinase-activated protein kinase 1b) (MAPK-activated protein kinase 1b) (MAPKAP kinase 1b) (MAPKAPK-1b) (Ribosomal S6 kinase 2) (RSK-2) (pp90RSK2)	RPS6KA3 ISPK1 MAPKAPK1B RSK2	Homo sapiens (Human)	740
K1C18_HUMAN	Protein	P05783	K1C18_HUMAN	Keratin, type I cytoskeletal 18 (Cell proliferation-inducing gene 46 protein) (Cytokeratin-18) (CK-18) (Keratin-18) (K18)	KRT18 CYK18 PIG46	Homo sapiens (Human)	430
PCBP2_HUMAN	Protein	Q15366	PCBP2_HUMAN	Poly(rC)-binding protein 2 (Alpha-CP2) (Heterogeneous nuclear ribonucleoprotein E2) (hnRNP E2)	PCBP2	Homo sapiens (Human)	365
HUTU_HUMAN	Protein	Q96N76	HUTU_HUMAN	Urocanate hydratase (Urocanase) (EC 4.2.1.49) (Imidazolonepropionate hydrolase)	UROC1	Homo sapiens (Human)	676
HIPL1_HUMAN	Protein	Q96JK4	HIPL1_HUMAN	HHIP-like protein 1	HHIPL1 HHIP2 KIAA1822 UNQ9245/PRO34761	Homo sapiens (Human)	782
EPS15_HUMAN	Protein	P42566	EPS15_HUMAN	Epidermal growth factor receptor substrate 15 (Protein Eps15) (Protein AF-1p)	EPS15 AF1P	Homo sapiens (Human)	896
FBLN4_HUMAN	Protein	O95967	FBLN4_HUMAN	EGF-containing fibulin-like extracellular matrix protein 2 (Fibulin-4) (FIBL-4) (Protein UPH1)	EFEMP2 FBLN4 UNQ200/PRO226	Homo sapiens (Human)	443
CA2D1_HUMAN	Protein	P54289	CA2D1_HUMAN	Voltage-dependent calcium channel subunit alpha-2/delta-1 (Voltage-gated calcium channel subunit alpha-2/delta-1) [Cleaved into: Voltage-dependent calcium channel subunit alpha-2-1; Voltage-dependent calcium channel subunit delta-1]	CACNA2D1 CACNL2A CCHL2A MHS3	Homo sapiens (Human)	1103
FUMH_HUMAN	Protein	P07954	FUMH_HUMAN	Fumarate hydratase, mitochondrial (Fumarase) (HsFH) (EC 4.2.1.2)	FH	Homo sapiens (Human)	510
TGBR3_HUMAN	Protein	Q03167	TGBR3_HUMAN	Transforming growth factor beta receptor type 3 (TGF-beta receptor type 3) (TGFR-3) (Betaglycan) (Transforming growth factor beta receptor III) (TGF-beta receptor type III)	TGFBR3	Homo sapiens (Human)	851
ACSA_HUMAN	Protein	Q9NR19	ACSA_HUMAN	Acetyl-coenzyme A synthetase, cytoplasmic (EC 6.2.1.1) (Acetate--CoA ligase) (Acetyl-CoA synthetase) (ACS) (AceCS) (Acetyl-CoA synthetase 1) (AceCS1) (Acyl-CoA synthetase short-chain family member 2) (Acyl-activating enzyme) (Propionate--CoA ligase) (EC 6.2.1.17)	ACSS2 ACAS2	Homo sapiens (Human)	701
CLIP1_HUMAN	Protein	P30622	CLIP1_HUMAN	CAP-Gly domain-containing linker protein 1 (Cytoplasmic linker protein 1) (Cytoplasmic linker protein 170 alpha-2) (CLIP-170) (Reed-Sternberg intermediate filament-associated protein) (Restin)	CLIP1 CYLN1 RSN	Homo sapiens (Human)	1438
HMCS1_HUMAN	Protein	Q01581	HMCS1_HUMAN	Hydroxymethylglutaryl-CoA synthase, cytoplasmic (HMG-CoA synthase) (EC 2.3.3.10) (3-hydroxy-3-methylglutaryl coenzyme A synthase)	HMGCS1 HMGCS	Homo sapiens (Human)	520
CAR(14:1)	Lipid	Carnitine
CAR(14:0)	Lipid	Carnitine
Cer (d18:1/16:0)	Lipid	Ceramide
Cer (d18:1/22:0)	Lipid	Ceramide
Cer (d18:1/24:0)	Lipid	Ceramide
Cer (d18:0/24:0)	Lipid	Ceramide
DG 34:2	Lipid	Diacylglycerol
DG34:1	Lipid	Diacylglycerol
DG 34:1	Lipid	Diacylglycerol
DG 36:3	Lipid	Diacylglycerol
DG 36:2	Lipid	Diacylglycerol
DG 36:1	Lipid	Diacylglycerol
LPC 18:1	Lipid	Lysophosphatidylcholine
LPC 20:1	Lipid	Lysophosphatidylcholine
LPC 22:6	Lipid	Lysophosphatidylcholine
PC 31:0	Lipid	Phosphatidylcholine
PC(16:0/18:1)	Lipid	Phosphatidylcholine
PC(16:0/20:4)	Lipid	Phosphatidylcholine
PC(18:0/18:2)	Lipid	Phosphatidylcholine
PC(18:0/18:1)	Lipid	Phosphatidylcholine
PC(18:0/20:3)	Lipid	Phosphatidylcholine
PC(16:0/22:6)	Lipid	Phosphatidylcholine
PC(16:0/16:0)	Lipid	Phosphatidylcholine
SM(18:1/16:1)	Lipid	Sphingomyelin
SM(d18:1/16:0)	Lipid	Sphingomyelin
SM(d18:1/22:1)	Lipid	Sphingomyelin
SM(d18:1/22:0)	Lipid	Sphingomyelin
SM(d18:1/23:0)	Lipid	Sphingomyelin
SM(d18:1/24:1)	Lipid	Sphingomyelin
SM(d18:1/24:0)	Lipid	Sphingomyelin
SM(18:1/20:0)	Lipid	Sphingomyelin
SM(18:0/22:0)	Lipid	Sphingomyelin
FA 18:2;O	Lipid	Fatty Acid
FA 20:5	Lipid	Fatty Acid
FA 20:4	Lipid	Fatty Acid
FA 22:5	Lipid	Fatty Acid
FA 22:4	Lipid	Fatty Acid
LPE 20:1	Lipid	Lysophosphatidylethanolamine
PE 38:2	Lipid	Phosphatidylinositol
PE 38:1	Lipid	Phosphatidylethanolamine
PI 40:6	Lipid	Phosphatidylethanolamine
SM 41:1;O2	Lipid	Sphingomyelin
SM 42:2;O2	Lipid	Sphingomyelin
SM 42:1;O2	Lipid	Sphingomyelin

## Sheet: GNP
Entity	Type	From	Entry	Entry Name	Protein names	Gene Names	Organism	Length
APOA2_BOVIN	Protein	APOA2_BOVIN	P81644	APOA2_BOVIN	Apolipoprotein A-II (Apo-AII) (ApoA-II) (Antimicrobial peptide BAMP-1) (Apolipoprotein A2) [Cleaved into: Proapolipoprotein A-II (ProapoA-II); Truncated apolipoprotein A-II (Apolipoprotein A-II(1-76))]	APOA2	Bos taurus (Bovine)	100
ITIH4_BOVIN	Protein	ITIH4_BOVIN	Q3T052	ITIH4_BOVIN	Inter-alpha-trypsin inhibitor heavy chain H4 (ITI heavy chain H4) (ITI-HC4) (Inter-alpha-inhibitor heavy chain 4)	ITIH4	Bos taurus (Bovine)	916
KNG1_BOVIN	Protein	KNG1_BOVIN	P01044	KNG1_BOVIN	Kininogen-1 (Kininogen I) (Thiol proteinase inhibitor) [Cleaved into: Kininogen-1 heavy chain; Bradykinin (Kallidin I); Lysyl-bradykinin (Kallidin II); Kininogen-1 light chain]	KNG1	Bos taurus (Bovine)	621
ANT3_BOVIN	Protein	ANT3_BOVIN	P41361	ANT3_BOVIN	Antithrombin-III (ATIII) (Serpin C1)	SERPINC1 AT3	Bos taurus (Bovine)	465
PROZ_BOVIN	Protein	PROZ_BOVIN	P00744	PROZ_BOVIN	Vitamin K-dependent protein Z	PROZ	Bos taurus (Bovine)	396
HBB_BOVIN	Protein	HBB_BOVIN	P02070	HBB_BOVIN	Hemoglobin subunit beta (Beta-globin) (Hemoglobin beta chain) [Cleaved into: Spinorphin]	HBB	Bos taurus (Bovine)	145
FINC_BOVIN	Protein	FINC_BOVIN	P07589	FINC_BOVIN	Fibronectin (FN) [Cleaved into: Anastellin]	FN1	Bos taurus (Bovine)	2478
IPSP_BOVIN	Protein	IPSP_BOVIN	Q9N2I2	IPSP_BOVIN	Plasma serine protease inhibitor (Protein C inhibitor) (PCI) (Serpin A5)	SERPINA5	Bos taurus (Bovine)	404
F13A_BOVIN	Protein	F13A_BOVIN	P12260	F13A_BOVIN	Coagulation factor XIII A chain (Coagulation factor XIIIa) (EC 2.3.2.13) (Protein-glutamine gamma-glutamyltransferase A chain) (Transglutaminase A chain)	F13A1 F13A	Bos taurus (Bovine)	198
TETN_BOVIN	Protein	TETN_BOVIN	Q2KIS7	TETN_BOVIN	Tetranectin (TN) (C-type lectin domain family 3 member B)	CLEC3B	Bos taurus (Bovine)	202
FIBG_BOVIN	Protein	FIBG_BOVIN	P12799	FIBG_BOVIN	Fibrinogen gamma-B chain (Gamma')	FGG	Bos taurus (Bovine)	444
PRDX6_BOVIN	Protein	PRDX6_BOVIN	O77834	PRDX6_BOVIN	Peroxiredoxin-6 (EC 1.11.1.27) (1-Cys peroxiredoxin) (1-Cys PRX) (Acidic calcium-independent phospholipase A2) (aiPLA2) (EC 3.1.1.4) (Antioxidant protein 2) (Ciliary body glutathione peroxidase) (Glutathione-dependent peroxiredoxin) (Lysophosphatidylcholine acyltransferase 5) (LPC acyltransferase 5) (LPCAT-5) (Lyso-PC acyltransferase 5) (EC 2.3.1.23) (Non-selenium glutathione peroxidase) (NSGPx) …	PRDX6 AOP2 GPX PHGPX	Bos taurus (Bovine)	224
CO7_BOVIN	Protein	CO7_BOVIN	Q29RQ1	CO7_BOVIN	Complement component C7	C7	Bos taurus (Bovine)	843
LDHB_BOVIN	Protein	LDHB_BOVIN	Q5E9B1	LDHB_BOVIN	L-lactate dehydrogenase B chain (LDH-B) (EC 1.1.1.27)	LDHB	Bos taurus (Bovine)	334
APOA4_BOVIN	Protein	APOA4_BOVIN	Q32PJ2	APOA4_BOVIN	Apolipoprotein A-IV (Apo-AIV) (ApoA-IV) (Apolipoprotein A4)	APOA4	Bos taurus (Bovine)	380
S10A8_BOVIN	Protein	S10A8_BOVIN	P28782	S10A8_BOVIN	Protein S100-A8 (BEE11) (Calgranulin-A) (Neutrophil cytosolic 7 kDa protein) (P7) (S100 calcium-binding protein A8)	S100A8	Bos taurus (Bovine)	89
CBPB2_BOVIN	Protein	CBPB2_BOVIN	Q2KIG3	CBPB2_BOVIN	Carboxypeptidase B2 (EC 3.4.17.20) (Carboxypeptidase U) (CPU) (Plasma carboxypeptidase B) (pCPB) (Thrombin-activable fibrinolysis inhibitor) (TAFI)	CPB2	Bos taurus (Bovine)	423
CATA_BOVIN	Protein	CATA_BOVIN	P00432	CATA_BOVIN	Catalase (EC 1.11.1.6)	CAT	Bos taurus (Bovine)	527
LBP_BOVIN	Protein	LBP_BOVIN	Q2TBI0	LBP_BOVIN	Lipopolysaccharide-binding protein (LBP)	LBP	Bos taurus (Bovine)	481
ACBP_BOVIN	Protein	ACBP_BOVIN	P07107	ACBP_BOVIN	Acyl-CoA-binding protein (ACBP) (Diazepam-binding inhibitor) (DBI) (Endozepine) (EP)	DBI	Bos taurus (Bovine)	87
GSTA1_BOVIN	Protein	GSTA1_BOVIN	Q28035	GSTA1_BOVIN	Glutathione S-transferase A1 (EC 2.5.1.18) (13-hydroperoxyoctadecadienoate peroxidase) (EC 1.11.1.-) (Androst-5-ene-3,17-dione isomerase) (EC 5.3.3.-) (GST class-alpha member 1) (Glutathione S-transferase alpha-1) [Cleaved into: Glutathione S-transferase A1, N-terminally processed]	GSTA1	Bos taurus (Bovine)	222
CD14_BOVIN	Protein	CD14_BOVIN	Q95122	CD14_BOVIN	Monocyte differentiation antigen CD14 (Myeloid cell-specific leucine-rich glycoprotein) (CD antigen CD14)	CD14	Bos taurus (Bovine)	373
COL11_BOVIN	Protein	COL11_BOVIN	Q17QH6	COL11_BOVIN	Collectin-11 (Collectin kidney protein 1) (CL-K1)	COLEC11	Bos taurus (Bovine)	267
F16P1_BOVIN	Protein	F16P1_BOVIN	Q3SZB7	F16P1_BOVIN	Fructose-1,6-bisphosphatase 1 (FBPase 1) (EC 3.1.3.11) (D-fructose-1,6-bisphosphate 1-phosphohydrolase 1) (Liver FBPase)	FBP1	Bos taurus (Bovine)	338
GTR3_BOVIN	Protein	GTR3_BOVIN	P58352	GTR3_BOVIN	Solute carrier family 2, facilitated glucose transporter member 3 (Glucose transporter type 3, brain) (GLUT-3)	SLC2A3 GLUT3	Bos taurus (Bovine)	494
DPYL2_BOVIN	Protein	DPYL2_BOVIN	O02675	DPYL2_BOVIN	Dihydropyrimidinase-related protein 2 (DRP-2) (Neural-specific protein NSP60)	DPYSL2	Bos taurus (Bovine)	572
KRT83_BOVIN	Protein	KRT83_BOVIN	A4FUZ0	KRT83_BOVIN	Keratin, type II cuticular Hb3 (Keratin-83) (K83) (Type II hair keratin Hb3) (Type-II keratin Kb23)	KRT83	Bos taurus (Bovine)	493
CONG_BOVIN	Protein	CONG_BOVIN	P23805	CONG_BOVIN	Conglutinin	CGN1	Bos taurus (Bovine)	371
CAN2_BOVIN	Protein	CAN2_BOVIN	Q27971	CAN2_BOVIN	Calpain-2 catalytic subunit (EC 3.4.22.53) (Calcium-activated neutral proteinase 2) (CANP 2) (Calpain M-type) (Calpain-2 large subunit) (Millimolar-calpain) (M-calpain)	CAPN2	Bos taurus (Bovine)	700
SEPR_BOVIN	Protein	SEPR_BOVIN	A5D7B7	SEPR_BOVIN	Prolyl endopeptidase FAP (EC 3.4.21.26) (Dipeptidyl peptidase FAP) (EC 3.4.14.5) (Fibroblast activation protein alpha) (FAPalpha) (Gelatine degradation protease FAP) (EC 3.4.21.-) (Integral membrane serine protease) (Post-proline cleaving enzyme) (Serine integral membrane protease) (SIMP) (Surface-expressed protease) (Seprase) (Z-Pro-prolinal insensitive peptidase) (ZIP) [Cleaved into: Antiplasmi…	FAP	Bos taurus (Bovine)	760
CO1A1_BOVIN	Protein	CO1A1_BOVIN	P02453	CO1A1_BOVIN	Collagen alpha-1(I) chain (Alpha-1 type I collagen)	COL1A1	Bos taurus (Bovine)	1463
GNAS3_BOVIN	Protein	GNAS3_BOVIN	O18979	GNAS3_BOVIN	Neuroendocrine secretory protein 55 (NESP55) [Cleaved into: LSAL tetrapeptide; GAIPIRRH peptide]	GNAS GNAS1	Bos taurus (Bovine)	241
MIS_BOVIN	Protein	MIS_BOVIN	P03972	MIS_BOVIN	Muellerian-inhibiting factor (Anti-Muellerian hormone) (AMH) (Muellerian-inhibiting substance) (MIS)	AMH	Bos taurus (Bovine)	575
KRT35_BOVIN	Protein	KRT35_BOVIN	Q0P5J7	KRT35_BOVIN	Keratin, type I cuticular Ha5 (Keratin-35) (K35)	KRT35	Bos taurus (Bovine)	454
MYG_BOVIN	Protein	MYG_BOVIN	P02192	MYG_BOVIN	Myoglobin	MB	Bos taurus (Bovine)	154
SBP1_BOVIN	Protein	SBP1_BOVIN	Q2KJ32	SBP1_BOVIN	Methanethiol oxidase (MTO) (EC 1.8.3.4) (56 kDa selenium-binding protein) (SBP56) (SP56) (Selenium-binding protein 1)	SELENBP1 SBP	Bos taurus (Bovine)	472
BASP1_BOVIN	Protein	BASP1_BOVIN	P80724	BASP1_BOVIN	Brain acid soluble protein 1 (22 kDa neuronal tissue-enriched acidic protein) (Neuronal axonal membrane protein NAP-22)	BASP1 NAP22	Bos taurus (Bovine)	227
USO1_BOVIN	Protein	USO1_BOVIN	P41541	USO1_BOVIN	General vesicular transport factor p115 (Protein USO1 homolog) (Transcytosis-associated protein) (TAP) (Vesicle-docking protein)	USO1 VDP	Bos taurus (Bovine)	961
FAS_BOVIN	Protein	FAS_BOVIN	Q71SP7	FAS_BOVIN	Fatty acid synthase (EC 2.3.1.85) [Includes: [Acyl-carrier-protein] S-acetyltransferase (EC 2.3.1.38); [Acyl-carrier-protein] S-malonyltransferase (EC 2.3.1.39); 3-oxoacyl-[acyl-carrier-protein] synthase (EC 2.3.1.41); 3-oxoacyl-[acyl-carrier-protein] reductase (EC 1.1.1.100); 3-hydroxyacyl-[acyl-carrier-protein] dehydratase (EC 4.2.1.59); Enoyl-[acyl-carrier-protein] reductase (EC 1.3.1.39); Acy…	FASN	Bos taurus (Bovine)	2513
WDR1_BOVIN	Protein	WDR1_BOVIN	Q2KJH4	WDR1_BOVIN	WD repeat-containing protein 1	WDR1	Bos taurus (Bovine)	606
HBA_HUMAN	Protein	HBA_HUMAN	P69905	HBA_HUMAN	Hemoglobin subunit alpha (Alpha-globin) (Hemoglobin alpha chain) [Cleaved into: Hemopressin]	HBA1; HBA2	Homo sapiens (Human)	142
KPYM_HUMAN	Protein	KPYM_HUMAN	P14618	KPYM_HUMAN	Pyruvate kinase PKM (EC 2.7.1.40) (Cytosolic thyroid hormone-binding protein) (CTHBP) (Opa-interacting protein 3) (OIP-3) (Pyruvate kinase 2/3) (Pyruvate kinase muscle isozyme) (Threonine-protein kinase PKM2) (EC 2.7.11.1) (Thyroid hormone-binding protein 1) (THBP1) (Tumor M2-PK) (Tyrosine-protein kinase PKM2) (EC 2.7.10.2) (p58)	PKM OIP3 PK2 PK3 PKM2	Homo sapiens (Human)	531
FLNA_HUMAN	Protein	FLNA_HUMAN	P21333	FLNA_HUMAN	Filamin-A (FLN-A) (Actin-binding protein 280) (ABP-280) (Alpha-filamin) (Endothelial actin-binding protein) (Filamin-1) (Non-muscle filamin)	FLNA FLN FLN1	Homo sapiens (Human)	2647
QSOX1_HUMAN	Protein	QSOX1_HUMAN	O00391	QSOX1_HUMAN	Sulfhydryl oxidase 1 (hQSOX) (EC 1.8.3.2) (Quiescin Q6)	QSOX1 QSCN6 UNQ2520/PRO6013	Homo sapiens (Human)	747
VINC_HUMAN	Protein	VINC_HUMAN	P18206	VINC_HUMAN	Vinculin (Metavinculin) (MV)	VCL	Homo sapiens (Human)	1134
F13A_HUMAN	Protein	F13A_HUMAN	P00488	F13A_HUMAN	Coagulation factor XIII A chain (Coagulation factor XIIIa) (EC 2.3.2.13) (Protein-glutamine gamma-glutamyltransferase A chain) (Transglutaminase A chain)	F13A1 F13A	Homo sapiens (Human)	732
PZP_HUMAN	Protein	PZP_HUMAN	P20742	PZP_HUMAN	Pregnancy zone protein (C3 and PZP-like alpha-2-macroglobulin domain-containing protein 6)	PZP CPAMD6	Homo sapiens (Human)	1482
LCAT_HUMAN	Protein	LCAT_HUMAN	P04180	LCAT_HUMAN	Phosphatidylcholine-sterol acyltransferase (EC 2.3.1.43) (1-alkyl-2-acetylglycerophosphocholine esterase) (EC 3.1.1.47) (Lecithin-cholesterol acyltransferase) (Phospholipid-cholesterol acyltransferase) (Platelet-activating factor acetylhydrolase) (PAF acetylhydrolase)	LCAT	Homo sapiens (Human)	440
ALDOA_HUMAN	Protein	ALDOA_HUMAN	P04075	ALDOA_HUMAN	Fructose-bisphosphate aldolase A (EC 4.1.2.13) (Lung cancer antigen NY-LU-1) (Muscle-type aldolase)	ALDOA ALDA	Homo sapiens (Human)	364
PLEK_HUMAN	Protein	PLEK_HUMAN	P08567	PLEK_HUMAN	Pleckstrin (Platelet 47 kDa protein) (p47)	PLEK P47	Homo sapiens (Human)	350
PARVB_HUMAN	Protein	PARVB_HUMAN	Q9HBI1	PARVB_HUMAN	Beta-parvin (Affixin)	PARVB CGI-56	Homo sapiens (Human)	364
ANXA5_HUMAN	Protein	ANXA5_HUMAN	P08758	ANXA5_HUMAN	Annexin A5 (Anchorin CII) (Annexin V) (Annexin-5) (Calphobindin I) (CPB-I) (Endonexin II) (Lipocortin V) (Placental anticoagulant protein 4) (PP4) (Placental anticoagulant protein I) (PAP-I) (Thromboplastin inhibitor) (Vascular anticoagulant-alpha) (VAC-alpha)	ANXA5 ANX5 ENX2 PP4	Homo sapiens (Human)	320
SHBG_HUMAN	Protein	SHBG_HUMAN	P04278	SHBG_HUMAN	Sex hormone-binding globulin (SHBG) (Sex steroid-binding protein) (SBP) (Testis-specific androgen-binding protein) (ABP) (Testosterone-estradiol-binding globulin) (TeBG) (Testosterone-estrogen-binding globulin)	SHBG	Homo sapiens (Human)	402
PRDX6_HUMAN	Protein	PRDX6_HUMAN	P30041	PRDX6_HUMAN	Peroxiredoxin-6 (EC 1.11.1.27) (1-Cys peroxiredoxin) (1-Cys PRX) (24 kDa protein) (Acidic calcium-independent phospholipase A2) (aiPLA2) (EC 3.1.1.4) (Antioxidant protein 2) (Glutathione-dependent peroxiredoxin) (Liver 2D page spot 40) (Lysophosphatidylcholine acyltransferase 5) (LPC acyltransferase 5) (LPCAT-5) (Lyso-PC acyltransferase 5) (EC 2.3.1.23) (Non-selenium glutathione peroxidase) (NSGP…	PRDX6 AOP2 KIAA0106	Homo sapiens (Human)	224
TPM4_HUMAN	Protein	TPM4_HUMAN	P67936	TPM4_HUMAN	Tropomyosin alpha-4 chain (TM30p1) (Tropomyosin-4)	TPM4	Homo sapiens (Human)	248
TRFL_HUMAN	Protein	TRFL_HUMAN	P02788	TRFL_HUMAN	Lactotransferrin (Lactoferrin) (EC 3.4.21.-) (Growth-inhibiting protein 12) (Talalactoferrin) [Cleaved into: Lactoferricin-H (Lfcin-H); Kaliocin-1; Lactoferroxin-A; Lactoferroxin-B; Lactoferroxin-C]	LTF GIG12 LF	Homo sapiens (Human)	710
RAB10_HUMAN	Protein	RAB10_HUMAN	P61026	RAB10_HUMAN	Ras-related protein Rab-10 (EC 3.6.5.2)	RAB10	Homo sapiens (Human)	200
LAMP2_HUMAN	Protein	LAMP2_HUMAN	P13473	LAMP2_HUMAN	Lysosome-associated membrane glycoprotein 2 (LAMP-2) (Lysosome-associated membrane protein 2) (CD107 antigen-like family member B) (LGP-96) (CD antigen CD107b)	LAMP2	Homo sapiens (Human)	410
ECM1_HUMAN	Protein	ECM1_HUMAN	Q16610	ECM1_HUMAN	Extracellular matrix protein 1 (Secretory component p85)	ECM1	Homo sapiens (Human)	540
SORCN_HUMAN	Protein	SORCN_HUMAN	P30626	SORCN_HUMAN	Sorcin (22 kDa protein) (CP-22) (CP22) (V19)	SRI	Homo sapiens (Human)	198
LRP1_HUMAN	Protein	LRP1_HUMAN	Q07954	LRP1_HUMAN	Prolow-density lipoprotein receptor-related protein 1 (LRP-1) (Alpha-2-macroglobulin receptor) (A2MR) (Apolipoprotein E receptor) (APOER) (CD antigen CD91) [Cleaved into: Low-density lipoprotein receptor-related protein 1 85 kDa subunit (LRP-85); Low-density lipoprotein receptor-related protein 1 515 kDa subunit (LRP-515); Low-density lipoprotein receptor-related protein 1 intracellular domain (L…	LRP1 A2MR APR	Homo sapiens (Human)	4544
COL10_HUMAN	Protein	COL10_HUMAN	Q9Y6Z7	COL10_HUMAN	Collectin-10 (Collectin liver protein 1) (CL-L1) (Collectin-34) (CL-34)	COLEC10 CLL1 UNQ366/PRO702	Homo sapiens (Human)	277
ANGL3_HUMAN	Protein	ANGL3_HUMAN	Q9Y5C1	ANGL3_HUMAN	Angiopoietin-related protein 3 (Angiopoietin-5) (ANG-5) (Angiopoietin-like protein 3) [Cleaved into: ANGPTL3(17-221); ANGPTL3(17-224)]	ANGPTL3 ANGPT5 UNQ153/PRO179	Homo sapiens (Human)	460
RHOG_HUMAN	Protein	RHOG_HUMAN	P84095	RHOG_HUMAN	Rho-related GTP-binding protein RhoG	RHOG ARHG	Homo sapiens (Human)	191
GAPR1_HUMAN	Protein	GAPR1_HUMAN	Q9H4G4	GAPR1_HUMAN	Golgi-associated plant pathogenesis-related protein 1 (GAPR-1) (Golgi-associated PR-1 protein) (Glioma pathogenesis-related protein 2) (GliPR 2)	GLIPR2 C9orf19 GAPR1	Homo sapiens (Human)	154
THBG_HUMAN	Protein	THBG_HUMAN	P05543	THBG_HUMAN	Thyroxine-binding globulin (Serpin A7) (T4-binding globulin)	SERPINA7 TBG	Homo sapiens (Human)	415
MA1A1_HUMAN	Protein	MA1A1_HUMAN	P33908	MA1A1_HUMAN	Mannosyl-oligosaccharide 1,2-alpha-mannosidase IA (EC 3.2.1.113) (Man(9)-alpha-mannosidase) (Man9-mannosidase) (Mannosidase alpha class 1A member 1) (Processing alpha-1,2-mannosidase IA) (Alpha-1,2-mannosidase IA)	MAN1A1	Homo sapiens (Human)	653
K1H1_HUMAN	Protein	K1H1_HUMAN	Q15323	K1H1_HUMAN	Keratin, type I cuticular Ha1 (Hair keratin, type I Ha1) (Keratin-31) (K31)	KRT31 HHA1 HKA1 KRTHA1	Homo sapiens (Human)	416
ALDOC_HUMAN	Protein	ALDOC_HUMAN	P09972	ALDOC_HUMAN	Fructose-bisphosphate aldolase C (EC 4.1.2.13) (Brain-type aldolase)	ALDOC ALDC	Homo sapiens (Human)	364
5MP2_HUMAN	Protein	5MP2_HUMAN	Q7L1Q6	5MP2_HUMAN	eIF5-mimic protein 2 (Basic leucine zipper and W2 domain-containing protein 1) (Protein Orf)	BZW1 5MP2 BZAP45 KIAA0005	Homo sapiens (Human)	419
STXB2_HUMAN	Protein	STXB2_HUMAN	Q15833	STXB2_HUMAN	Syntaxin-binding protein 2 (Protein unc-18 homolog 2) (Unc18-2) (Protein unc-18 homolog B) (Unc-18B)	STXBP2 UNC18B	Homo sapiens (Human)	593
FABP5_HUMAN	Protein	FABP5_HUMAN	Q01469	FABP5_HUMAN	Fatty acid-binding protein 5 (Epidermal-type fatty acid-binding protein) (E-FABP) (Fatty acid-binding protein, epidermal) (Psoriasis-associated fatty acid-binding protein homolog) (PA-FABP)	FABP5	Homo sapiens (Human)	135
TFG_HUMAN	Protein	TFG_HUMAN	Q92734	TFG_HUMAN	Protein TFG (TRK-fused gene protein)	TFG	Homo sapiens (Human)	400
PA2G4_HUMAN	Protein	PA2G4_HUMAN	Q9UQ80	PA2G4_HUMAN	Proliferation-associated protein 2G4 (Cell cycle protein p38-2G4 homolog) (hG4-1) (ErbB3-binding protein 1)	PA2G4 EBP1	Homo sapiens (Human)	394
PIP_HUMAN	Protein	PIP_HUMAN	P12273	PIP_HUMAN	Prolactin-inducible protein (Gross cystic disease fluid protein 15) (GCDFP-15) (Prolactin-induced protein) (Secretory actin-binding protein) (SABP) (gp17)	PIP GCDFP15 GPIP4	Homo sapiens (Human)	146
KCD12_HUMAN	Protein	KCD12_HUMAN	Q96CX2	KCD12_HUMAN	BTB/POZ domain-containing protein KCTD12 (Pfetin) (Predominantly fetal expressed T1 domain)	KCTD12 C13orf2 KIAA1778 PFET1	Homo sapiens (Human)	325
IF5_HUMAN	Protein	IF5_HUMAN	P55010	IF5_HUMAN	Eukaryotic translation initiation factor 5 (eIF-5)	EIF5	Homo sapiens (Human)	431
CALD1_HUMAN	Protein	CALD1_HUMAN	Q05682	CALD1_HUMAN	Caldesmon (CDM)	CALD1 CAD CDM	Homo sapiens (Human)	793
S29A1_HUMAN	Protein	S29A1_HUMAN	Q99808	S29A1_HUMAN	Equilibrative nucleoside transporter 1 (hENT1) (Equilibrative nitrobenzylmercaptopurine riboside-sensitive nucleoside transporter) (Equilibrative NBMPR-sensitive nucleoside transporter) (es nucleoside transporter) (Nucleoside transporter, es-type) (Solute carrier family 29 member 1)	SLC29A1 ENT1	Homo sapiens (Human)	456
LEG3_HUMAN	Protein	LEG3_HUMAN	P17931	LEG3_HUMAN	Galectin-3 (Gal-3) (35 kDa lectin) (Carbohydrate-binding protein 35) (CBP 35) (Galactose-specific lectin 3) (Galactoside-binding protein) (GALBP) (IgE-binding protein) (L-31) (Laminin-binding protein) (Lectin L-29) (Mac-2 antigen)	LGALS3 MAC2	Homo sapiens (Human)	250
VAT1_HUMAN	Protein	VAT1_HUMAN	Q99536	VAT1_HUMAN	Synaptic vesicle membrane protein VAT-1 homolog (EC 1.-.-.-)	VAT1	Homo sapiens (Human)	393
GSTO1_HUMAN	Protein	GSTO1_HUMAN	P78417	GSTO1_HUMAN	Glutathione S-transferase omega-1 (GSTO-1) (EC 2.5.1.18) (Glutathione S-transferase omega 1-1) (GSTO 1-1) (Glutathione-dependent dehydroascorbate reductase) (EC 1.8.5.1) (Monomethylarsonic acid reductase) (MMA(V) reductase) (EC 1.20.4.2) (S-(Phenacyl)glutathione reductase) (SPG-R)	GSTO1 GSTTLP28	Homo sapiens (Human)	241
PDC6I_HUMAN	Protein	PDC6I_HUMAN	Q8WUM4	PDC6I_HUMAN	Programmed cell death 6-interacting protein (PDCD6-interacting protein) (ALG-2-interacting protein 1) (ALG-2-interacting protein X) (Hp95)	PDCD6IP AIP1 ALIX KIAA1375	Homo sapiens (Human)	868
LIMS1_HUMAN	Protein	LIMS1_HUMAN	P48059	LIMS1_HUMAN	LIM and senescent cell antigen-like-containing domain protein 1 (Particularly interesting new Cys-His protein 1) (PINCH-1) (Renal carcinoma antigen NY-REN-48)	LIMS1 PINCH PINCH1	Homo sapiens (Human)	325
COR1A_HUMAN	Protein	COR1A_HUMAN	P31146	COR1A_HUMAN	Coronin-1A (Coronin-like protein A) (Clipin-A) (Coronin-like protein p57) (Tryptophan aspartate-containing coat protein) (TACO)	CORO1A CORO1	Homo sapiens (Human)	461
K2C8_HUMAN	Protein	K2C8_HUMAN	P05787	K2C8_HUMAN	Keratin, type II cytoskeletal 8 (Cytokeratin-8) (CK-8) (Keratin-8) (K8) (Type-II keratin Kb8)	KRT8 CYK8	Homo sapiens (Human)	483
G6PD_HUMAN	Protein	G6PD_HUMAN	P11413	G6PD_HUMAN	Glucose-6-phosphate 1-dehydrogenase (G6PD) (EC 1.1.1.49)	G6PD	Homo sapiens (Human)	515
F13B_HUMAN	Protein	F13B_HUMAN	P05160	F13B_HUMAN	Coagulation factor XIII B chain (Fibrin-stabilizing factor B subunit) (Protein-glutamine gamma-glutamyltransferase B chain) (Transglutaminase B chain)	F13B	Homo sapiens (Human)	661
RAB14_HUMAN	Protein	RAB14_HUMAN	P61106	RAB14_HUMAN	Ras-related protein Rab-14	RAB14	Homo sapiens (Human)	215
ANGL6_HUMAN	Protein	ANGL6_HUMAN	Q8NI99	ANGL6_HUMAN	Angiopoietin-related protein 6 (Angiopoietin-like protein 6) (Angiopoietin-related growth factor) (Angiopoietin-related protein 5)	ANGPTL6 AGF ARP5 UNQ152/PRO178	Homo sapiens (Human)	470
TCPE_HUMAN	Protein	TCPE_HUMAN	P48643	TCPE_HUMAN	T-complex protein 1 subunit epsilon (TCP-1-epsilon) (CCT-epsilon)	CCT5 CCTE KIAA0098	Homo sapiens (Human)	541
MYO1G_HUMAN	Protein	MYO1G_HUMAN	B0I1T2	MYO1G_HUMAN	Unconventional myosin-Ig [Cleaved into: Minor histocompatibility antigen HA-2 (mHag HA-2)]	MYO1G HA2	Homo sapiens (Human)	1018
LACRT_HUMAN	Protein	LACRT_HUMAN	Q9GZZ8	LACRT_HUMAN	Extracellular glycoprotein lacritin	LACRT	Homo sapiens (Human)	138
KT33B_HUMAN	Protein	KT33B_HUMAN	Q14525	KT33B_HUMAN	Keratin, type I cuticular Ha3-II (Hair keratin, type I Ha3-II) (Keratin-33B) (K33B)	KRT33B HHA3-II HKA3B KRTHA3B	Homo sapiens (Human)	404
KTN1_HUMAN	Protein	KTN1_HUMAN	Q86UP2	KTN1_HUMAN	Kinectin (CG-1 antigen) (Kinesin receptor)	KTN1 CG1 KIAA0004	Homo sapiens (Human)	1357
GSTP1_HUMAN	Protein	GSTP1_HUMAN	P09211	GSTP1_HUMAN	Glutathione S-transferase P (EC 2.5.1.18) (GST class-pi) (GSTP1-1)	GSTP1 FAEES3 GST3	Homo sapiens (Human)	210
TGM3_HUMAN	Protein	TGM3_HUMAN	Q08188	TGM3_HUMAN	Protein-glutamine gamma-glutamyltransferase E (EC 2.3.2.13) (Transglutaminase E) (TG(E)) (TGE) (TGase E) (Transglutaminase-3) (TGase-3) [Cleaved into: Protein-glutamine gamma-glutamyltransferase E 50 kDa catalytic chain; Protein-glutamine gamma-glutamyltransferase E 27 kDa non-catalytic chain]	TGM3	Homo sapiens (Human)	693
ATRN_HUMAN	Protein	ATRN_HUMAN	O75882	ATRN_HUMAN	Attractin (DPPT-L) (Mahogany homolog)	ATRN KIAA0548 MGCA	Homo sapiens (Human)	1429
CLIP1_HUMAN	Protein	CLIP1_HUMAN	P30622	CLIP1_HUMAN	CAP-Gly domain-containing linker protein 1 (Cytoplasmic linker protein 1) (Cytoplasmic linker protein 170 alpha-2) (CLIP-170) (Reed-Sternberg intermediate filament-associated protein) (Restin)	CLIP1 CYLN1 RSN	Homo sapiens (Human)	1438
MRC2_HUMAN	Protein	MRC2_HUMAN	Q9UBG0	MRC2_HUMAN	C-type mannose receptor 2 (C-type lectin domain family 13 member E) (Endocytic receptor 180) (Macrophage mannose receptor 2) (Urokinase-type plasminogen activator receptor-associated protein) (UPAR-associated protein) (Urokinase receptor-associated protein) (CD antigen CD280)	MRC2 CLEC13E ENDO180 KIAA0709 UPARAP	Homo sapiens (Human)	1479
KRT34_HUMAN	Protein	KRT34_HUMAN	O76011	KRT34_HUMAN	Keratin, type I cuticular Ha4 (Hair keratin, type I Ha4) (Keratin-34) (K34)	KRT34 HHA4 HKA4 KRTHA4	Homo sapiens (Human)	394
ANTR1_HUMAN	Protein	ANTR1_HUMAN	Q9H6X2	ANTR1_HUMAN	Anthrax toxin receptor 1 (Tumor endothelial marker 8)	ANTXR1 ATR TEM8	Homo sapiens (Human)	564
SEPT9_HUMAN	Protein	SEPT9_HUMAN	Q9UHD8	SEPT9_HUMAN	Septin-9 (MLL septin-like fusion protein MSF-A) (MLL septin-like fusion protein) (Ovarian/Breast septin) (Ov/Br septin) (Septin D1)	SEPTIN9 KIAA0991 MSF SEPT9	Homo sapiens (Human)	586
SPB3_HUMAN	Protein	SPB3_HUMAN	P29508	SPB3_HUMAN	Serpin B3 (Protein T4-A) (Squamous cell carcinoma antigen 1) (SCCA-1)	SERPINB3 SCCA SCCA1	Homo sapiens (Human)	390
SBSN_HUMAN	Protein	SBSN_HUMAN	Q6UWP8	SBSN_HUMAN	Suprabasin	SBSN UNQ698/PRO1343	Homo sapiens (Human)	590
SG2A1_HUMAN	Protein	SG2A1_HUMAN	O75556	SG2A1_HUMAN	Mammaglobin-B (Lacryglobin) (Lipophilin-C) (Mammaglobin-2) (Secretoglobin family 2A member 1)	SCGB2A1 LIPHC MGB2 UGB3	Homo sapiens (Human)	95
HORN_HUMAN	Protein	HORN_HUMAN	Q86YZ3	HORN_HUMAN	Hornerin	HRNR S100A18	Homo sapiens (Human)	2850
RIR1_HUMAN	Protein	RIR1_HUMAN	P23921	RIR1_HUMAN	Ribonucleoside-diphosphate reductase large subunit (EC 1.17.4.1) (Ribonucleoside-diphosphate reductase subunit M1) (Ribonucleotide reductase large subunit)	RRM1 RR1	Homo sapiens (Human)	792
PDIA3_HUMAN	Protein	PDIA3_HUMAN	P30101	PDIA3_HUMAN	Protein disulfide-isomerase A3 (EC 5.3.4.1) (58 kDa glucose-regulated protein) (58 kDa microsomal protein) (p58) (Disulfide isomerase ER-60) (Endoplasmic reticulum resident protein 57) (ER protein 57) (ERp57) (Endoplasmic reticulum resident protein 60) (ER protein 60) (ERp60)	PDIA3 ERP57 ERP60 GRP58	Homo sapiens (Human)	505
ROCK1_HUMAN	Protein	ROCK1_HUMAN	Q13464	ROCK1_HUMAN	Rho-associated protein kinase 1 (EC 2.7.11.1) (Renal carcinoma antigen NY-REN-35) (Rho-associated, coiled-coil-containing protein kinase 1) (Rho-associated, coiled-coil-containing protein kinase I) (ROCK-I) (p160 ROCK-1) (p160ROCK)	ROCK1	Homo sapiens (Human)	1354
SCFD1_HUMAN	Protein	SCFD1_HUMAN	Q8WVM8	SCFD1_HUMAN	Sec1 family domain-containing protein 1 (SLY1 homolog) (Sly1p) (Syntaxin-binding protein 1-like 2)	SCFD1 C14orf163 KIAA0917 STXBP1L2 FKSG23	Homo sapiens (Human)	642
CAR(10:0)	Lipid	Carnitine
CAR(14:1)	Lipid	Carnitine
CAR(14:0)	Lipid	Carnitine
CAR(16:1)	Lipid	Carnitine
Cer (d18:1/16:0)	Lipid	Ceramide
Cer (d18:1/20:0)	Lipid	Ceramide
Cer (d18:1/22:0)	Lipid	Ceramide
Cer (d18:1/24:0)	Lipid	Ceramide
Cer (d18:0/24:0)	Lipid	Ceramide
HexCer d18:1/24:0)	Lipid	Ceramide
HexCer d18:1/24:1)	Lipid	Ceramide
DG 34:2	Lipid	Diacylglycerol
DG34:1 (18:1/16:0)	Lipid	Diacylglycerol
DG 34:1	Lipid	Diacylglycerol
DG 36:3	Lipid	Diacylglycerol
DG 36:2	Lipid	Diacylglycerol
DG 36:1	Lipid	Diacylglycerol
FA 16:0	Lipid	Fatty Acid
FA 18:0	Lipid	Fatty Acid
FA 18:2;O	Lipid	Fatty Acid
LPC 18:2	Lipid	Lysophosphatidylcholine
LPC 18:0	Lipid	Lysophosphatidylcholine
LPC 22:6	Lipid	Lysophosphatidylcholine
LPE 18:0	Lipid	Lysophosphatidylethanolamine
LPE 20:0	Lipid	Lysophosphatidylethanolamine
PE 38:1	Lipid	Phosphatidylethanolamine
PC(O-16:0/2:0)	Lipid	Phosphatidylcholine
PC 31:0	Lipid	Phosphatidylcholine
PC(16:0/18:1)	Lipid	Phosphatidylcholine
PC(16:0/18:0)	Lipid	Phosphatidylcholine
PC(16:0/20:4)	Lipid	Phosphatidylcholine
PC(18:0/18:1)	Lipid	Phosphatidylcholine
PC(18:0/20:3)	Lipid	Phosphatidylcholine
PC(16:0/22:6)	Lipid	Phosphatidylcholine
PC(16:0/16:0)	Lipid	Phosphatidylcholine
PC(18:2/20:4)	Lipid	Phosphatidylcholine
PE(18:0/18:1)	Lipid	Phosphatidylethanolamine
PE(18:0/22:6)	Lipid	Phosphatidylethanolamine
PI 36:4	Lipid	Phosphatidylinositol
SM 42:1;O2	Lipid	Sphingomyelin
