# Supplementary material for: Sources of biases in the in vitro testing of nanomaterials: the role of the biomolecular corona
Source: Royal Society of Chemistry journal article supplement (doi:10.1039/d3nh00510k), 2024-01-01
Supplement: d3nh00510k7.xlsx [file d3nh00510k7.xlsx]

## Sheet: GO
Entity	Type	From	Entry	Entry Name	Protein names	Gene Names	Organism	Length
APOA1_BOVIN	Protein	APOA1_BOVIN	P15497	APOA1_BOVIN	Apolipoprotein A-I (Apo-AI) (ApoA-I) (Apolipoprotein A1) [Cleaved into: Proapolipoprotein A-I (ProapoA-I); Truncated apolipoprotein A-I]	APOA1	Bos taurus (Bovine)	265
A2MG_BOVIN	Protein	A2MG_BOVIN	Q7SIH1	A2MG_BOVIN	Alpha-2-macroglobulin (Alpha-2-M)	A2M	Bos taurus (Bovine)	1510
APOH_BOVIN	Protein	APOH_BOVIN	P17690	APOH_BOVIN	Beta-2-glycoprotein 1 (Apolipoprotein H) (Apo-H) (Beta-2-glycoprotein I) (B2GPI) (Beta(2)GPI)	APOH	Bos taurus (Bovine)	345
HBA_BOVIN	Protein	HBA_BOVIN	P01966	HBA_BOVIN	Hemoglobin subunit alpha (Alpha-globin) (Hemoglobin alpha chain) [Cleaved into: Hemopressin]	HBA	Bos taurus (Bovine)	142
F12AI_BOVIN	Protein	F12AI_BOVIN	P50448	F12AI_BOVIN	Factor XIIa inhibitor (XIIaINH)		Bos taurus (Bovine)	468
HBBF_BOVIN	Protein	HBBF_BOVIN	P02081	HBBF_BOVIN	Hemoglobin fetal subunit beta (Beta-globin, fetal) (Hemoglobin beta chain, fetal) (Hemoglobin gamma chain)		Bos taurus (Bovine)	145
FA5_BOVIN	Protein	FA5_BOVIN	Q28107	FA5_BOVIN	Coagulation factor V (Activated protein C cofactor) [Cleaved into: Coagulation factor V heavy chain; Coagulation factor V light chain]	F5	Bos taurus (Bovine)	2211
CFAH_BOVIN	Protein	CFAH_BOVIN	Q28085	CFAH_BOVIN	Complement factor H (H factor 1)	CFH HF1	Bos taurus (Bovine)	1236
GELS_BOVIN	Protein	GELS_BOVIN	Q3SX14	GELS_BOVIN	Gelsolin (Actin-depolymerizing factor) (ADF) (Brevin)	GSN	Bos taurus (Bovine)	731
THRB_BOVIN	Protein	THRB_BOVIN	P00735	THRB_BOVIN	Prothrombin (EC 3.4.21.5) (Coagulation factor II) [Cleaved into: Activation peptide fragment 1; Activation peptide fragment 2; Thrombin light chain; Thrombin heavy chain]	F2	Bos taurus (Bovine)	625
TSP1_BOVIN	Protein	TSP1_BOVIN	Q28178	TSP1_BOVIN	Thrombospondin-1 (Glycoprotein G)	THBS1 TSP-1 TSP1	Bos taurus (Bovine)	1170
APOE_BOVIN	Protein	APOE_BOVIN	Q03247	APOE_BOVIN	Apolipoprotein E (Apo-E)	APOE	Bos taurus (Bovine)	316
PEDF_BOVIN	Protein	PEDF_BOVIN	Q95121	PEDF_BOVIN	Pigment epithelium-derived factor (PEDF) (Serpin F1)	SERPINF1 PEDF	Bos taurus (Bovine)	416
CASB_BOVIN	Protein	CASB_BOVIN	P02666	CASB_BOVIN	Beta-casein [Cleaved into: Casoparan; Antioxidant peptide; Casohypotensin]	CSN2	Bos taurus (Bovine)	224
HABP2_BOVIN	Protein	HABP2_BOVIN	Q5E9Z2	HABP2_BOVIN	Hyaluronan-binding protein 2 (EC 3.4.21.-) [Cleaved into: Hyaluronan-binding protein 2 50 kDa heavy chain; Hyaluronan-binding protein 2 50 kDa heavy chain alternate form; Hyaluronan-binding protein 2 27 kDa light chain; Hyaluronan-binding protein 2 27 kDa light chain alternate form]	HABP2	Bos taurus (Bovine)	558
ITIH4_BOVIN	Protein	ITIH4_BOVIN	Q3T052	ITIH4_BOVIN	Inter-alpha-trypsin inhibitor heavy chain H4 (ITI heavy chain H4) (ITI-HC4) (Inter-alpha-inhibitor heavy chain 4)	ITIH4	Bos taurus (Bovine)	916
G3P_BOVIN	Protein	G3P_BOVIN	P10096	G3P_BOVIN	Glyceraldehyde-3-phosphate dehydrogenase (GAPDH) (EC 1.2.1.12) (Peptidyl-cysteine S-nitrosylase GAPDH) (EC 2.6.99.-)	GAPDH GAPD	Bos taurus (Bovine)	333
BGH3_BOVIN	Protein	BGH3_BOVIN	P55906	BGH3_BOVIN	Transforming growth factor-beta-induced protein ig-h3 (Beta ig-h3) (MP70) (MP78)	TGFBI BIGH3	Bos taurus (Bovine)	683
FA9_BOVIN	Protein	FA9_BOVIN	P00741	FA9_BOVIN	Coagulation factor IX (EC 3.4.21.22) (Christmas factor) [Cleaved into: Coagulation factor IXa light chain; Coagulation factor IXa heavy chain]	F9	Bos taurus (Bovine)	462
FIBG_BOVIN	Protein	FIBG_BOVIN	P12799	FIBG_BOVIN	Fibrinogen gamma-B chain (Gamma')	FGG	Bos taurus (Bovine)	444
LBP_BOVIN	Protein	LBP_BOVIN	Q2TBI0	LBP_BOVIN	Lipopolysaccharide-binding protein (LBP)	LBP	Bos taurus (Bovine)	481
FRIL_BOVIN	Protein	FRIL_BOVIN	O46415	FRIL_BOVIN	Ferritin light chain (Ferritin L subunit)	FTL	Bos taurus (Bovine)	175
FINC_BOVIN	Protein	FINC_BOVIN	P07589	FINC_BOVIN	Fibronectin (FN) [Cleaved into: Anastellin]	FN1	Bos taurus (Bovine)	2478
PRDX6_BOVIN	Protein	PRDX6_BOVIN	O77834	PRDX6_BOVIN	Peroxiredoxin-6 (EC 1.11.1.27) (1-Cys peroxiredoxin) (1-Cys PRX) (Acidic calcium-independent phospholipase A2) (aiPLA2) (EC 3.1.1.4) (Antioxidant protein 2) (Ciliary body glutathione peroxidase) (Glutathione-dependent peroxiredoxin) (Lysophosphatidylcholine acyltransferase 5) (LPC acyltransferase 5) (LPCAT-5) (Lyso-PC acyltransferase 5) (EC 2.3.1.23) (Non-selenium glutathione peroxidase) (NSGPx) …	PRDX6 AOP2 GPX PHGPX	Bos taurus (Bovine)	224
CFAD_BOVIN	Protein	CFAD_BOVIN	Q3T0A3	CFAD_BOVIN	Complement factor D (EC 3.4.21.46) (Adipsin) (C3 convertase activator) (Properdin factor D)	CFD	Bos taurus (Bovine)	259
URP2_BOVIN	Protein	URP2_BOVIN	Q32LP0	URP2_BOVIN	Fermitin family homolog 3 (Kindlin-3) (Unc-112-related protein 2)	FERMT3 KIND3 URP2	Bos taurus (Bovine)	665
HBB_BOVIN	Protein	HBB_BOVIN	P02070	HBB_BOVIN	Hemoglobin subunit beta (Beta-globin) (Hemoglobin beta chain) [Cleaved into: Spinorphin]	HBB	Bos taurus (Bovine)	145
SAHH_BOVIN	Protein	SAHH_BOVIN	Q3MHL4	SAHH_BOVIN	Adenosylhomocysteinase (AdoHcyase) (EC 3.13.2.1) (S-adenosyl-L-homocysteine hydrolase)	AHCY	Bos taurus (Bovine)	432
PROF1_BOVIN	Protein	PROF1_BOVIN	P02584	PROF1_BOVIN	Profilin-1 (Profilin I)	PFN1	Bos taurus (Bovine)	140
C1S_BOVIN	Protein	C1S_BOVIN	Q0VCX1	C1S_BOVIN	Complement C1s subcomponent (EC 3.4.21.42) (C1 esterase) (Complement component 1 subcomponent s) [Cleaved into: Complement C1s subcomponent heavy chain; Complement C1s subcomponent light chain]	C1S	Bos taurus (Bovine)	689
COL11_BOVIN	Protein	COL11_BOVIN	Q17QH6	COL11_BOVIN	Collectin-11 (Collectin kidney protein 1) (CL-K1)	COLEC11	Bos taurus (Bovine)	267
AL9A1_BOVIN	Protein	AL9A1_BOVIN	Q2KJH9	AL9A1_BOVIN	4-trimethylaminobutyraldehyde dehydrogenase (TMABA-DH) (TMABADH) (EC 1.2.1.47) (Aldehyde dehydrogenase family 9 member A1) (EC 1.2.1.3)	ALDH9A1	Bos taurus (Bovine)	494
GALK1_BOVIN	Protein	GALK1_BOVIN	A6H768	GALK1_BOVIN	Galactokinase (EC 2.7.1.6) (Galactose kinase)	GALK1	Bos taurus (Bovine)	392
F13A_BOVIN	Protein	F13A_BOVIN	P12260	F13A_BOVIN	Coagulation factor XIII A chain (Coagulation factor XIIIa) (EC 2.3.2.13) (Protein-glutamine gamma-glutamyltransferase A chain) (Transglutaminase A chain)	F13A1 F13A	Bos taurus (Bovine)	198
F16P1_BOVIN	Protein	F16P1_BOVIN	Q3SZB7	F16P1_BOVIN	Fructose-1,6-bisphosphatase 1 (FBPase 1) (EC 3.1.3.11) (D-fructose-1,6-bisphosphate 1-phosphohydrolase 1) (Liver FBPase)	FBP1	Bos taurus (Bovine)	338
NHRF1_BOVIN	Protein	NHRF1_BOVIN	Q3SZK8	NHRF1_BOVIN	Na(+)/H(+) exchange regulatory cofactor NHE-RF1 (NHERF-1) (Ezrin-radixin-moesin-binding phosphoprotein 50) (EBP50) (Regulatory cofactor of Na(+)/H(+) exchanger) (Sodium-hydrogen exchanger regulatory factor 1) (Solute carrier family 9 isoform A3 regulatory factor 1)	NHERF1 NHERF SLC9A3R1	Bos taurus (Bovine)	368
ARLY_BOVIN	Protein	ARLY_BOVIN	Q3SZJ0	ARLY_BOVIN	Argininosuccinate lyase (ASAL) (EC 4.3.2.1) (Arginosuccinase)	ASL	Bos taurus (Bovine)	473
CMGA_BOVIN	Protein	CMGA_BOVIN	P05059	CMGA_BOVIN	Chromogranin-A (CgA) (Pituitary secretory protein I) (SP-I) [Cleaved into: Vasostatin-1; Chromofungin; Chromostatin; Chromacin; Pancreastatin; WE-14; Catestatin; GE-25; Serpinin-RRG; Serpinin; p-Glu serpinin precursor]	CHGA	Bos taurus (Bovine)	449
BLVRB_BOVIN	Protein	BLVRB_BOVIN	P52556	BLVRB_BOVIN	Flavin reductase (NADPH) (FR) (EC 1.5.1.30) (Biliverdin reductase B) (BVR-B) (EC 1.3.1.24) (Biliverdin-IX beta-reductase) (Green heme-binding protein) (GHBP) (NADPH-dependent diaphorase) (NADPH-flavin reductase) (FLR)	BLVRB	Bos taurus (Bovine)	206
COR1A_BOVIN	Protein	COR1A_BOVIN	Q92176	COR1A_BOVIN	Coronin-1A (Coronin-like protein A) (Clipin-A) (Coronin-like protein p57) (Tryptophan aspartate-containing coat protein) (TACO)	CORO1A CORO1	Bos taurus (Bovine)	461
ESTD_BOVIN	Protein	ESTD_BOVIN	Q08E20	ESTD_BOVIN	S-formylglutathione hydrolase (FGH) (EC 3.1.2.12) (Esterase D)	ESD	Bos taurus (Bovine)	282
DHSO_BOVIN	Protein	DHSO_BOVIN	Q58D31	DHSO_BOVIN	Sorbitol dehydrogenase (SDH) (EC 1.1.1.-) (L-iditol 2-dehydrogenase) (EC 1.1.1.14) (Polyol dehydrogenase) (Xylitol dehydrogenase) (XDH) (EC 1.1.1.9)	SORD	Bos taurus (Bovine)	356
MIME_BOVIN	Protein	MIME_BOVIN	P19879	MIME_BOVIN	Mimecan (Osteoglycin) [Cleaved into: Corneal keratan sulfate proteoglycan 25 core protein (KSPG25 protein); Osteoinductive factor (OIF)]	OGN OIF	Bos taurus (Bovine)	299
PGK1_BOVIN	Protein	PGK1_BOVIN	Q3T0P6	PGK1_BOVIN	Phosphoglycerate kinase 1 (EC 2.7.2.3)	PGK1	Bos taurus (Bovine)	417
TETN_BOVIN	Protein	TETN_BOVIN	Q2KIS7	TETN_BOVIN	Tetranectin (TN) (C-type lectin domain family 3 member B)	CLEC3B	Bos taurus (Bovine)	202
APOC3_BOVIN	Protein	APOC3_BOVIN	P19035	APOC3_BOVIN	Apolipoprotein C-III (Apo-CIII) (ApoC-III) (Apolipoprotein C3)	APOC3	Bos taurus (Bovine)	96
ATOX1_BOVIN	Protein	ATOX1_BOVIN	Q3T0E0	ATOX1_BOVIN	Copper transport protein ATOX1 (Metal transport protein ATX1)	ATOX1	Bos taurus (Bovine)	68
C1QB_BOVIN	Protein	C1QB_BOVIN	Q2KIV9	C1QB_BOVIN	Complement C1q subcomponent subunit B	C1QB	Bos taurus (Bovine)	247
GSTA1_BOVIN	Protein	GSTA1_BOVIN	Q28035	GSTA1_BOVIN	Glutathione S-transferase A1 (EC 2.5.1.18) (13-hydroperoxyoctadecadienoate peroxidase) (EC 1.11.1.-) (Androst-5-ene-3,17-dione isomerase) (EC 5.3.3.-) (GST class-alpha member 1) (Glutathione S-transferase alpha-1) [Cleaved into: Glutathione S-transferase A1, N-terminally processed]	GSTA1	Bos taurus (Bovine)	222
LEG1_BOVIN	Protein	LEG1_BOVIN	P11116	LEG1_BOVIN	Galectin-1 (Gal-1) (14 kDa lectin) (Beta-galactoside-binding lectin L-14-I) (Galaptin) (Lactose-binding lectin 1) (Lectin galactoside-binding soluble 1) (S-Lac lectin 1)	LGALS1	Bos taurus (Bovine)	135
PRDX5_BOVIN	Protein	PRDX5_BOVIN	Q9BGI1	PRDX5_BOVIN	Peroxiredoxin-5, mitochondrial (EC 1.11.1.24) (Peroxiredoxin V) (Prx-V) (Thioredoxin peroxidase) (Thioredoxin-dependent peroxiredoxin 5)	PRDX5	Bos taurus (Bovine)	219
ASSY_BOVIN	Protein	ASSY_BOVIN	P14568	ASSY_BOVIN	Argininosuccinate synthase (EC 6.3.4.5) (Citrulline--aspartate ligase)	ASS1	Bos taurus (Bovine)	412
RCN3_BOVIN	Protein	RCN3_BOVIN	Q2KJ39	RCN3_BOVIN	Reticulocalbin-3	RCN3	Bos taurus (Bovine)	328
QPCT_BOVIN	Protein	QPCT_BOVIN	Q28120	QPCT_BOVIN	Glutaminyl-peptide cyclotransferase (EC 2.3.2.5) (Glutaminyl cyclase) (QC) (Glutaminyl-tRNA cyclotransferase)	QPCT	Bos taurus (Bovine)	361
CADH2_BOVIN	Protein	CADH2_BOVIN	P19534	CADH2_BOVIN	Cadherin-2 (Neural cadherin) (N-cadherin) (CD antigen CD325)	CDH2	Bos taurus (Bovine)	906
PUR8_BOVIN	Protein	PUR8_BOVIN	A3KN12	PUR8_BOVIN	Adenylosuccinate lyase (ADSL) (ASL) (EC 4.3.2.2) (Adenylosuccinase) (ASase)	ADSL	Bos taurus (Bovine)	490
SAA_BOVIN	Protein	SAA_BOVIN	P35541	SAA_BOVIN	Serum amyloid A protein (SAA) [Cleaved into: Amyloid protein A (Amyloid fibril protein AA)]	SAA1 SAA	Bos taurus (Bovine)	130
CO9A2_BOVIN	Protein	CO9A2_BOVIN	C0HLN2	CO9A2_BOVIN	Collagen alpha-2(IX) chain (Collagen type IX alpha 2 chain)	COL9A2	Bos taurus (Bovine)	688
CNDP2_BOVIN	Protein	CNDP2_BOVIN	Q3ZC84	CNDP2_BOVIN	Cytosolic non-specific dipeptidase (EC 3.4.13.18) (CNDP dipeptidase 2) (Threonyl dipeptidase)	CNDP2	Bos taurus (Bovine)	475
FKBP4_BOVIN	Protein	FKBP4_BOVIN	Q9TRY0	FKBP4_BOVIN	Peptidyl-prolyl cis-trans isomerase FKBP4 (PPIase FKBP4) (EC 5.2.1.8) (52 kDa FK506-binding protein) (52 kDa FKBP) (FKBP-52) (FK506-binding protein 4) (FKBP-4) (HSP-binding immunophilin) (HBI) (Immunophilin FKBP52) (Rotamase) [Cleaved into: Peptidyl-prolyl cis-trans isomerase FKBP4, N-terminally processed]	FKBP4	Bos taurus (Bovine)	459
MARCS_BOVIN	Protein	MARCS_BOVIN	P12624	MARCS_BOVIN	Myristoylated alanine-rich C-kinase substrate (MARCKS) (ACAMP-81)	MARCKS MACS	Bos taurus (Bovine)	333
CAP1_BOVIN	Protein	CAP1_BOVIN	Q3SYV4	CAP1_BOVIN	Adenylyl cyclase-associated protein 1 (CAP 1)	CAP1	Bos taurus (Bovine)	472
AGRE5_BOVIN	Protein	AGRE5_BOVIN	Q8SQA4	AGRE5_BOVIN	Adhesion G protein-coupled receptor E5 (Leukocyte antigen CD97) (CD antigen CD97) [Cleaved into: Adhesion G protein-coupled receptor E5 subunit alpha; Adhesion G protein-coupled receptor E5 subunit beta]	ADGRE5 CD97	Bos taurus (Bovine)	734
CLIC1_BOVIN	Protein	CLIC1_BOVIN	Q5E9B7	CLIC1_BOVIN	Chloride intracellular channel protein 1	CLIC1	Bos taurus (Bovine)	241
ACOHC_BOVIN	Protein	ACOHC_BOVIN	Q0VCU1	ACOHC_BOVIN	Cytoplasmic aconitate hydratase (Aconitase) (EC 4.2.1.3) (Citrate hydro-lyase) (Iron-responsive element-binding protein 1) (IRE-BP 1)	ACO1	Bos taurus (Bovine)	889
PUR9_BOVIN	Protein	PUR9_BOVIN	Q0VCK0	PUR9_BOVIN	Bifunctional purine biosynthesis protein ATIC (AICAR transformylase/inosine monophosphate cyclohydrolase) (ATIC) [Includes: Phosphoribosylaminoimidazolecarboxamide formyltransferase (EC 2.1.2.3) (5-aminoimidazole-4-carboxamide ribonucleotide formyltransferase) (AICAR formyltransferase) (AICAR transformylase); Inosine 5'-monophosphate cyclohydrolase (IMP cyclohydrolase) (EC 3.5.4.10) (IMP synthase…	ATIC PURH	Bos taurus (Bovine)	592
PBLD_BOVIN	Protein	PBLD_BOVIN	Q2HJF4	PBLD_BOVIN	Phenazine biosynthesis-like domain-containing protein (EC 5.1.-.-)	PBLD MAWBP	Bos taurus (Bovine)	288
GSTP1_BOVIN	Protein	GSTP1_BOVIN	P28801	GSTP1_BOVIN	Glutathione S-transferase P (EC 2.5.1.18) (GST class-pi)	GSTP1	Bos taurus (Bovine)	210
ARY1_BOVIN	Protein	ARY1_BOVIN	Q1JPA6	ARY1_BOVIN	Arylamine N-acetyltransferase 1 (EC 2.3.1.5) (Arylamide acetylase 1) (N-acetyltransferase type 1) (NAT-1)	NAT1	Bos taurus (Bovine)	290
HSPB1_BOVIN	Protein	HSPB1_BOVIN	Q3T149	HSPB1_BOVIN	Heat shock protein beta-1 (HspB1) (Heat shock 27 kDa protein) (HSP 27)	HSPB1 HSP27	Bos taurus (Bovine)	201
METK1_BOVIN	Protein	METK1_BOVIN	Q2KJC6	METK1_BOVIN	S-adenosylmethionine synthase isoform type-1 (AdoMet synthase 1) (EC 2.5.1.6) (Methionine adenosyltransferase 1) (MAT 1)	MAT1A	Bos taurus (Bovine)	396
GPX1_BOVIN	Protein	GPX1_BOVIN	P00435	GPX1_BOVIN	Glutathione peroxidase 1 (GPx-1) (GSHPx-1) (EC 1.11.1.9) (Cellular glutathione peroxidase)	GPX1	Bos taurus (Bovine)	205
UBP14_BOVIN	Protein	UBP14_BOVIN	Q0IIF7	UBP14_BOVIN	Ubiquitin carboxyl-terminal hydrolase 14 (EC 3.4.19.12) (Deubiquitinating enzyme 14) (Ubiquitin thioesterase 14) (Ubiquitin-specific-processing protease 14)	USP14	Bos taurus (Bovine)	494
UMPS_BOVIN	Protein	UMPS_BOVIN	P31754	UMPS_BOVIN	Uridine 5'-monophosphate synthase (UMP synthase) [Includes: Orotate phosphoribosyltransferase (OPRTase) (EC 2.4.2.10); Orotidine 5'-phosphate decarboxylase (EC 4.1.1.23) (OMPdecase)]	UMPS	Bos taurus (Bovine)	480
CTHL4_BOVIN	Protein	CTHL4_BOVIN	P33046	CTHL4_BOVIN	Cathelicidin-4 (Indolicidin)	CATHL4	Bos taurus (Bovine)	144
NSF1C_BOVIN	Protein	NSF1C_BOVIN	Q3SZC4	NSF1C_BOVIN	NSFL1 cofactor p47 (p97 cofactor p47)	NSFL1C	Bos taurus (Bovine)	370
CASA1_BOVIN	Protein	CASA1_BOVIN	P02662	CASA1_BOVIN	Alpha-S1-casein (allergen Bos d 8) [Cleaved into: Antioxidant peptide]	CSN1S1	Bos taurus (Bovine)	214
NMRL1_BOVIN	Protein	NMRL1_BOVIN	Q0VCN1	NMRL1_BOVIN	NmrA-like family domain-containing protein 1	NMRAL1	Bos taurus (Bovine)	299
EF1D_BOVIN	Protein	EF1D_BOVIN	A5D989	EF1D_BOVIN	Elongation factor 1-delta (EF-1-delta)	EEF1D	Bos taurus (Bovine)	280
PGS2_BOVIN	Protein	PGS2_BOVIN	P21793	PGS2_BOVIN	Decorin (Bone proteoglycan II) (PG-S2)	DCN	Bos taurus (Bovine)	360
DBNL_BOVIN	Protein	DBNL_BOVIN	A6H7G2	DBNL_BOVIN	Drebrin-like protein	DBNL	Bos taurus (Bovine)	423
COMT_BOVIN	Protein	COMT_BOVIN	A7MBI7	COMT_BOVIN	Catechol O-methyltransferase (EC 2.1.1.6)	COMT	Bos taurus (Bovine)	272
CO1A1_BOVIN	Protein	CO1A1_BOVIN	P02453	CO1A1_BOVIN	Collagen alpha-1(I) chain (Alpha-1 type I collagen)	COL1A1	Bos taurus (Bovine)	1463
PMM2_BOVIN	Protein	PMM2_BOVIN	Q3SZJ9	PMM2_BOVIN	Phosphomannomutase 2 (PMM 2) (EC 5.4.2.8)	PMM2	Bos taurus (Bovine)	246
CPNS1_BOVIN	Protein	CPNS1_BOVIN	P13135	CPNS1_BOVIN	Calpain small subunit 1 (CSS1) (Calcium-activated neutral proteinase small subunit) (CANP small subunit) (Calcium-dependent protease small subunit) (CDPS) (Calcium-dependent protease small subunit 1) (Calpain regulatory subunit)	CAPNS1 CAPN4	Bos taurus (Bovine)	263
QSPP_BOVIN	Protein
XPP1_BOVIN	Protein	XPP1_BOVIN	Q1JPJ2	XPP1_BOVIN	Xaa-Pro aminopeptidase 1 (EC 3.4.11.9) (Aminoacylproline aminopeptidase) (Cytosolic aminopeptidase P) (Soluble aminopeptidase P) (sAmp) (X-Pro aminopeptidase 1) (X-prolyl aminopeptidase 1, soluble)	XPNPEP1	Bos taurus (Bovine)	623
CBR1_BOVIN	Protein	CBR1_BOVIN	Q3SZD7	CBR1_BOVIN	Carbonyl reductase [NADPH] 1 (EC 1.1.1.184) (15-hydroxyprostaglandin dehydrogenase [NADP(+)]) (EC 1.1.1.196, EC 1.1.1.197) (20-beta-hydroxysteroid dehydrogenase) (Alcohol dehydrogenase [NAD(P)+] CBR1) (EC 1.1.1.71) (NADPH-dependent carbonyl reductase 1) (Prostaglandin 9-ketoreductase) (PG-9-KR) (Prostaglandin-E(2) 9-reductase) (EC 1.1.1.189)	CBR1	Bos taurus (Bovine)	277
GPX3_BOVIN	Protein	GPX3_BOVIN	P37141	GPX3_BOVIN	Glutathione peroxidase 3 (GPx-3) (GSHPx-3) (EC 1.11.1.9) (Plasma glutathione peroxidase) (GPx-P) (GSHPx-P)	GPX3	Bos taurus (Bovine)	226
NP1L4_BOVIN	Protein	NP1L4_BOVIN	Q2TA40	NP1L4_BOVIN	Nucleosome assembly protein 1-like 4	NAP1L4	Bos taurus (Bovine)	386
PRELP_BOVIN	Protein	PRELP_BOVIN	Q9GKN8	PRELP_BOVIN	Prolargin (Proline-arginine-rich end leucine-rich repeat protein)	PRELP	Bos taurus (Bovine)	381
PARK7_BOVIN	Protein	PARK7_BOVIN	Q5E946	PARK7_BOVIN	Parkinson disease protein 7 homolog (Maillard deglycase) (Parkinsonism-associated deglycase) (Protein DJ-1) (DJ-1) (Protein/nucleic acid deglycase DJ-1) (EC 3.1.2.-, EC 3.5.1.-, EC 3.5.1.124)	PARK7	Bos taurus (Bovine)	189
PSMD9_BOVIN	Protein	PSMD9_BOVIN	Q3SZ19	PSMD9_BOVIN	26S proteasome non-ATPase regulatory subunit 9 (26S proteasome regulatory subunit p27)	PSMD9	Bos taurus (Bovine)	221
A16A1_BOVIN	Protein	A16A1_BOVIN	A6QR56	A16A1_BOVIN	Aldehyde dehydrogenase family 16 member A1	ALDH16A1	Bos taurus (Bovine)	800
UBA1_BOVIN	Protein	UBA1_BOVIN	A3KMV5	UBA1_BOVIN	Ubiquitin-like modifier-activating enzyme 1 (EC 6.2.1.45) (Ubiquitin-activating enzyme E1)	UBA1 UBE1	Bos taurus (Bovine)	1058
SNX5_BOVIN	Protein	SNX5_BOVIN	Q3ZBM5	SNX5_BOVIN	Sorting nexin-5	SNX5	Bos taurus (Bovine)	404
SPON1_BOVIN	Protein	SPON1_BOVIN	Q9GLX9	SPON1_BOVIN	Spondin-1 (F-spondin) (Vascular smooth muscle cell growth-promoting factor)	SPON1 VSGP	Bos taurus (Bovine)	807
ATS2_BOVIN	Protein	ATS2_BOVIN	P79331	ATS2_BOVIN	A disintegrin and metalloproteinase with thrombospondin motifs 2 (ADAM-TS 2) (ADAM-TS2) (ADAMTS-2) (EC 3.4.24.14) (Procollagen I N-proteinase) (PC I-NP) (Procollagen I/II amino propeptide-processing enzyme) (Procollagen N-endopeptidase) (pNPI)	ADAMTS2 NPI	Bos taurus (Bovine)	1205
CFAI_HUMAN	Protein	CFAI_HUMAN	P05156	CFAI_HUMAN	Complement factor I (EC 3.4.21.45) (C3B/C4B inactivator) [Cleaved into: Complement factor I heavy chain; Complement factor I light chain]	CFI IF	Homo sapiens (Human)	583
IBP6_HUMAN	Protein	IBP6_HUMAN	P24592	IBP6_HUMAN	Insulin-like growth factor-binding protein 6 (IBP-6) (IGF-binding protein 6) (IGFBP-6)	IGFBP6 IBP6	Homo sapiens (Human)	240
KRT36_HUMAN	Protein	KRT36_HUMAN	O76013	KRT36_HUMAN	Keratin, type I cuticular Ha6 (Hair keratin, type I Ha6) (Keratin-36) (K36)	KRT36 HHA6 HKA6 KRTHA6	Homo sapiens (Human)	467
PARVA_HUMAN	Protein	PARVA_HUMAN	Q9NVD7	PARVA_HUMAN	Alpha-parvin (Actopaxin) (CH-ILKBP) (Calponin-like integrin-linked kinase-binding protein) (Matrix-remodeling-associated protein 2)	PARVA MXRA2	Homo sapiens (Human)	372
CE(16:0)	Lipid	Cholesteryl esters
CE(18:2)	Lipid	Cholesteryl esters
TG 48:1; TG(16:0/16:0/16:1)	Lipid	Triacylglycerols
TG 48:2; TG(16:0/16:1/16:1)	Lipid	Triacylglycerols
TG 48:0; TG(16:0/16:0/16:0)	Lipid	Triacylglycerols
TG 50:2; TG(16:0/18:1/16:1)	Lipid	Triacylglycerols
TG 51:2; TG(16:0/17:1/18:1)	Lipid	Triacylglycerols
TG 52:4; TG(16:0/18:2/18:2)	Lipid	Triacylglycerols
TG 52:3; TG(16:0/18:1/18:2)	Lipid	Triacylglycerols
TG 52:3; TG(16:0/16:0/20:3)	Lipid	Triacylglycerols
TG 52:2; TG(16:0/18:1/18:1)	Lipid	Triacylglycerols
TG 52:1; TG(16:0/18:0/18:1)	Lipid	Triacylglycerols
TG 52:0; TG(16:0/18:0/18:0)	Lipid	Triacylglycerols
TG 54:6; TG(18:2/18:2/18:2)	Lipid	Triacylglycerols
TG 54:4; TG(16:0/20:2/18:2)	Lipid	Triacylglycerols
TG 54:0; TG(18:0/18:0/18:0)	Lipid	Triacylglycerols
TG 56:8; TG(18:2/20:4/18:2)	Lipid	Triacylglycerols
PE(18:0/22:4)	Lipid	Phosphatidylethanolamine
PE(18:0/22:6)	Lipid	Phosphatidylethanolamine
PS-O 38:0	Lipid	Phosphatidylserine

## Sheet: GNP
Entity	Type	From	Entry	Entry Name	Protein names	Gene Names	Organism	Length
APOE_BOVIN	Protein	APOE_BOVIN	Q03247	APOE_BOVIN	Apolipoprotein E (Apo-E)	APOE	Bos taurus (Bovine)	316
HRG_BOVIN	Protein	HRG_BOVIN	P33433	HRG_BOVIN	Histidine-rich glycoprotein (Histidine-proline-rich glycoprotein) (HPRG)	HRG	Bos taurus (Bovine)	396
URP2_BOVIN	Protein	URP2_BOVIN	Q32LP0	URP2_BOVIN	Fermitin family homolog 3 (Kindlin-3) (Unc-112-related protein 2)	FERMT3 KIND3 URP2	Bos taurus (Bovine)	665
CTHL1_BOVIN	Protein	CTHL1_BOVIN	P22226	CTHL1_BOVIN	Cathelicidin-1 (Bactenecin-1) (Bac1) (Cyclic dodecapeptide)	CATHL1 BAC1	Bos taurus (Bovine)	155
CASA1_BOVIN	Protein	CASA1_BOVIN	P02662	CASA1_BOVIN	Alpha-S1-casein (allergen Bos d 8) [Cleaved into: Antioxidant peptide]	CSN1S1	Bos taurus (Bovine)	214
CASB_BOVIN	Protein	CASB_BOVIN	P02666	CASB_BOVIN	Beta-casein [Cleaved into: Casoparan; Antioxidant peptide; Casohypotensin]	CSN2	Bos taurus (Bovine)	224
MGP_BOVIN	Protein	MGP_BOVIN	P07507	MGP_BOVIN	Matrix Gla protein (MGP) [Cleaved into: Matrix Gla protein long form; Matrix Gla protein short form]	MGP	Bos taurus (Bovine)	103
C1QA_BOVIN	Protein	C1QA_BOVIN	Q5E9E3	C1QA_BOVIN	Complement C1q subcomponent subunit A	C1QA	Bos taurus (Bovine)	244
OLFL3_BOVIN	Protein	OLFL3_BOVIN	Q0VCP3	OLFL3_BOVIN	Olfactomedin-like protein 3	OLFML3	Bos taurus (Bovine)	406
HA1B_BOVIN	Protein	HA1B_BOVIN	P13753	HA1B_BOVIN	BOLA class I histocompatibility antigen, alpha chain BL3-7		Bos taurus (Bovine)	364
PGM1_BOVIN	Protein	PGM1_BOVIN	Q08DP0	PGM1_BOVIN	Phosphoglucomutase-1 (PGM 1) (EC 5.4.2.2) (Glucose phosphomutase 1)	PGM1	Bos taurus (Bovine)	562
CBR1_BOVIN	Protein	CBR1_BOVIN	Q3SZD7	CBR1_BOVIN	Carbonyl reductase [NADPH] 1 (EC 1.1.1.184) (15-hydroxyprostaglandin dehydrogenase [NADP(+)]) (EC 1.1.1.196, EC 1.1.1.197) (20-beta-hydroxysteroid dehydrogenase) (Alcohol dehydrogenase [NAD(P)+] CBR1) (EC 1.1.1.71) (NADPH-dependent carbonyl reductase 1) (Prostaglandin 9-ketoreductase) (PG-9-KR) (Prostaglandin-E(2) 9-reductase) (EC 1.1.1.189)	CBR1	Bos taurus (Bovine)	277
IBP2_BOVIN	Protein	IBP2_BOVIN	P13384	IBP2_BOVIN	Insulin-like growth factor-binding protein 2 (IBP-2) (IGF-binding protein 2) (IGFBP-2)	IGFBP2	Bos taurus (Bovine)	317
SERA_BOVIN	Protein	SERA_BOVIN	Q5EAD2	SERA_BOVIN	D-3-phosphoglycerate dehydrogenase (3-PGDH) (EC 1.1.1.95) (2-oxoglutarate reductase) (EC 1.1.1.399) (Malate dehydrogenase) (EC 1.1.1.37)	PHGDH	Bos taurus (Bovine)	533
HEBP1_BOVIN	Protein	HEBP1_BOVIN	Q148C9	HEBP1_BOVIN	Heme-binding protein 1	HEBP1	Bos taurus (Bovine)	191
DCTN2_BOVIN	Protein	DCTN2_BOVIN	Q3ZCF0	DCTN2_BOVIN	Dynactin subunit 2	DCTN2	Bos taurus (Bovine)	403
ANX11_BOVIN	Protein	ANX11_BOVIN	P27214	ANX11_BOVIN	Annexin A11 (Annexin XI) (Annexin-11) (Calcyclin-associated annexin-50) (CAP-50)	ANXA11 ANX11	Bos taurus (Bovine)	503
BPT2_BOVIN	Protein	BPT2_BOVIN	P04815	BPT2_BOVIN	Spleen trypsin inhibitor I (SI-I) [Cleaved into: Spleen trypsin inhibitor II (SI-II); Spleen trypsin inhibitor III (SI-III)]		Bos taurus (Bovine)	100
COR1A_BOVIN	Protein	COR1A_BOVIN	Q92176	COR1A_BOVIN	Coronin-1A (Coronin-like protein A) (Clipin-A) (Coronin-like protein p57) (Tryptophan aspartate-containing coat protein) (TACO)	CORO1A CORO1	Bos taurus (Bovine)	461
TPMT_BOVIN	Protein	TPMT_BOVIN	Q17QQ2	TPMT_BOVIN	Thiopurine S-methyltransferase (EC 2.1.1.67) (Thiopurine methyltransferase)	TPMT	Bos taurus (Bovine)	245
CAN1_BOVIN	Protein	CAN1_BOVIN	Q27970	CAN1_BOVIN	Calpain-1 catalytic subunit (EC 3.4.22.52) (Calcium-activated neutral proteinase 1) (CANP 1) (Calpain mu-type) (Calpain-1 large subunit) (Micromolar-calpain) (muCANP)	CAPN1	Bos taurus (Bovine)	716
LACB_BOVIN	Protein	LACB_BOVIN	P02754	LACB_BOVIN	Beta-lactoglobulin (Beta-LG) (allergen Bos d 5)	LGB	Bos taurus (Bovine)	178
SGTA_BOVIN	Protein	SGTA_BOVIN	Q32LM2	SGTA_BOVIN	Small glutamine-rich tetratricopeptide repeat-containing protein alpha (Alpha-SGT)	SGTA	Bos taurus (Bovine)	313
CNDP2_BOVIN	Protein	CNDP2_BOVIN	Q3ZC84	CNDP2_BOVIN	Cytosolic non-specific dipeptidase (EC 3.4.13.18) (CNDP dipeptidase 2) (Threonyl dipeptidase)	CNDP2	Bos taurus (Bovine)	475
KRT81_BOVIN	Protein	KRT81_BOVIN	Q148H4	KRT81_BOVIN	Keratin, type II cuticular Hb1 (Keratin-81) (K81) (Type II hair keratin Hb1) (Type-II keratin Kb21)	KRT81	Bos taurus (Bovine)	500
NHRF1_BOVIN	Protein	NHRF1_BOVIN	Q3SZK8	NHRF1_BOVIN	Na(+)/H(+) exchange regulatory cofactor NHE-RF1 (NHERF-1) (Ezrin-radixin-moesin-binding phosphoprotein 50) (EBP50) (Regulatory cofactor of Na(+)/H(+) exchanger) (Sodium-hydrogen exchanger regulatory factor 1) (Solute carrier family 9 isoform A3 regulatory factor 1)	NHERF1 NHERF SLC9A3R1	Bos taurus (Bovine)	368
EZRI_BOVIN	Protein	EZRI_BOVIN	P31976	EZRI_BOVIN	Ezrin (Cytovillin) (Villin-2) (p81)	EZR VIL2	Bos taurus (Bovine)	581
RENBP_BOVIN	Protein	RENBP_BOVIN	Q2KIS1	RENBP_BOVIN	N-acylglucosamine 2-epimerase (AGE) (EC 5.1.3.8) (GlcNAc 2-epimerase) (N-acetyl-D-glucosamine 2-epimerase) (Renin-binding protein) (RnBP)	RENBP	Bos taurus (Bovine)	422
IBP3_BOVIN	Protein	IBP3_BOVIN	P20959	IBP3_BOVIN	Insulin-like growth factor-binding protein 3 (IBP-3) (IGF-binding protein 3) (IGFBP-3)	IGFBP3	Bos taurus (Bovine)	291
VTNC_HUMAN	Protein	VTNC_HUMAN	P04004	VTNC_HUMAN	Vitronectin (VN) (S-protein) (Serum-spreading factor) (V75) [Cleaved into: Vitronectin V65 subunit; Vitronectin V10 subunit; Somatomedin-B]	VTN	Homo sapiens (Human)	478
ALBU_HUMAN	Protein	ALBU_HUMAN	P02768	ALBU_HUMAN	Albumin	ALB GIG20 GIG42 PRO0903 PRO1708 PRO2044 PRO2619 PRO2675 UNQ696/PRO1341	Homo sapiens (Human)	609
IGKC_HUMAN	Protein	IGKC_HUMAN	P01834	IGKC_HUMAN	Immunoglobulin kappa constant (Ig kappa chain C region) (Ig kappa chain C region AG) (Ig kappa chain C region CUM) (Ig kappa chain C region EU) (Ig kappa chain C region OU) (Ig kappa chain C region ROY) (Ig kappa chain C region TI)	IGKC	Homo sapiens (Human)	107
APOA1_HUMAN	Protein	APOA1_HUMAN	P02647	APOA1_HUMAN	Apolipoprotein A-I (Apo-AI) (ApoA-I) (Apolipoprotein A1) [Cleaved into: Proapolipoprotein A-I (ProapoA-I); Truncated apolipoprotein A-I (Apolipoprotein A-I(1-242))]	APOA1	Homo sapiens (Human)	267
KNG1_HUMAN	Protein	KNG1_HUMAN	P01042	KNG1_HUMAN	Kininogen-1 (Alpha-2-thiol proteinase inhibitor) (Fitzgerald factor) (High molecular weight kininogen) (HMWK) (Williams-Fitzgerald-Flaujeac factor) [Cleaved into: Kininogen-1 heavy chain; T-kinin (Ile-Ser-Bradykinin); Bradykinin (Kallidin I); Lysyl-bradykinin (Kallidin II); Kininogen-1 light chain; Low molecular weight growth-promoting factor]	KNG1 BDK KNG	Homo sapiens (Human)	644
IGHM_HUMAN	Protein	IGHM_HUMAN	P01871	IGHM_HUMAN	Immunoglobulin heavy constant mu (Ig mu chain C region) (Ig mu chain C region BOT) (Ig mu chain C region GAL) (Ig mu chain C region OU)	IGHM	Homo sapiens (Human)	474
APOE_HUMAN	Protein	APOE_HUMAN	P02649	APOE_HUMAN	Apolipoprotein E (Apo-E)	APOE	Homo sapiens (Human)	317
APOB_HUMAN	Protein	APOB_HUMAN	P04114	APOB_HUMAN	Apolipoprotein B-100 (Apo B-100) [Cleaved into: Apolipoprotein B-48 (Apo B-48)]	APOB	Homo sapiens (Human)	4563
IGHG2_HUMAN	Protein	IGHG2_HUMAN	P01859	IGHG2_HUMAN	Immunoglobulin heavy constant gamma 2 (Ig gamma-2 chain C region) (Ig gamma-2 chain C region DOT) (Ig gamma-2 chain C region TIL) (Ig gamma-2 chain C region ZIE)	IGHG2	Homo sapiens (Human)	395
CLUS_HUMAN	Protein	CLUS_HUMAN	P10909	CLUS_HUMAN	Clusterin (Aging-associated gene 4 protein) (Apolipoprotein J) (Apo-J) (Complement cytolysis inhibitor) (CLI) (Complement-associated protein SP-40,40) (Ku70-binding protein 1) (NA1/NA2) (Sulfated glycoprotein 2) (SGP-2) (Testosterone-repressed prostate message 2) (TRPM-2) [Cleaved into: Clusterin beta chain (ApoJalpha) (Complement cytolysis inhibitor a chain) (SP-40,40 beta-chain); Clusterin alph…	CLU APOJ CLI KUB1 AAG4	Homo sapiens (Human)	449
APOC3_HUMAN	Protein	APOC3_HUMAN	P02656	APOC3_HUMAN	Apolipoprotein C-III (Apo-CIII) (ApoC-III) (Apolipoprotein C3)	APOC3	Homo sapiens (Human)	99
APOA2_HUMAN	Protein	APOA2_HUMAN	P02652	APOA2_HUMAN	Apolipoprotein A-II (Apo-AII) (ApoA-II) (Apolipoprotein A2) [Cleaved into: Proapolipoprotein A-II (ProapoA-II); Truncated apolipoprotein A-II (Apolipoprotein A-II(1-76))]	APOA2	Homo sapiens (Human)	100
APOA_HUMAN	Protein	APOA_HUMAN	P08519	APOA_HUMAN	Apolipoprotein(a) (Apo(a)) (Lp(a)) (EC 3.4.21.-)	LPA	Homo sapiens (Human)	2040
IGHA1_HUMAN	Protein	IGHA1_HUMAN	P01876	IGHA1_HUMAN	Immunoglobulin heavy constant alpha 1 (Ig alpha-1 chain C region) (Ig alpha-1 chain C region BUR) (Ig alpha-1 chain C region TRO)	IGHA1	Homo sapiens (Human)	398
FIBB_HUMAN	Protein	FIBB_HUMAN	P02675	FIBB_HUMAN	Fibrinogen beta chain [Cleaved into: Fibrinopeptide B; Fibrinogen beta chain]	FGB	Homo sapiens (Human)	491
ITIH4_HUMAN	Protein	ITIH4_HUMAN	Q14624	ITIH4_HUMAN	Inter-alpha-trypsin inhibitor heavy chain H4 (ITI heavy chain H4) (ITI-HC4) (Inter-alpha-inhibitor heavy chain 4) (Inter-alpha-trypsin inhibitor family heavy chain-related protein) (IHRP) (Plasma kallikrein sensitive glycoprotein 120) (Gp120) (PK-120) [Cleaved into: 70 kDa inter-alpha-trypsin inhibitor heavy chain H4; 35 kDa inter-alpha-trypsin inhibitor heavy chain H4]	ITIH4 IHRP ITIHL1 PK120 PRO1851	Homo sapiens (Human)	930
FIBA_HUMAN	Protein	FIBA_HUMAN	P02671	FIBA_HUMAN	Fibrinogen alpha chain [Cleaved into: Fibrinopeptide A; Fibrinogen alpha chain]	FGA	Homo sapiens (Human)	866
CO9_HUMAN	Protein	CO9_HUMAN	P02748	CO9_HUMAN	Complement component C9 [Cleaved into: Complement component C9a; Complement component C9b]	C9	Homo sapiens (Human)	559
APOC1_HUMAN	Protein	APOC1_HUMAN	P02654	APOC1_HUMAN	Apolipoprotein C-I (Apo-CI) (ApoC-I) (Apolipoprotein C1) [Cleaved into: Truncated apolipoprotein C-I]	APOC1	Homo sapiens (Human)	83
IGJ_HUMAN	Protein	IGJ_HUMAN	P01591	IGJ_HUMAN	Immunoglobulin J chain (Joining chain of multimeric IgA and IgM)	JCHAIN IGCJ IGJ	Homo sapiens (Human)	159
FIBG_HUMAN	Protein	FIBG_HUMAN	P02679	FIBG_HUMAN	Fibrinogen gamma chain	FGG PRO2061	Homo sapiens (Human)	453
CO3_HUMAN	Protein	CO3_HUMAN	P01024	CO3_HUMAN	Complement C3 (C3 and PZP-like alpha-2-macroglobulin domain-containing protein 1) [Cleaved into: Complement C3 beta chain; C3-beta-c (C3bc); Complement C3 alpha chain; C3a anaphylatoxin; Acylation stimulating protein (ASP) (C3adesArg); Complement C3b alpha' chain; Complement C3c alpha' chain fragment 1; Complement C3dg fragment; Complement C3g fragment; Complement C3d fragment; Complement C3f fra…	C3 CPAMD1	Homo sapiens (Human)	1663
APOM_HUMAN	Protein	APOM_HUMAN	O95445	APOM_HUMAN	Apolipoprotein M (Apo-M) (ApoM) (Protein G3a)	APOM G3A NG20 HSPC336	Homo sapiens (Human)	188
FA11_HUMAN	Protein	FA11_HUMAN	P03951	FA11_HUMAN	Coagulation factor XI (FXI) (EC 3.4.21.27) (Plasma thromboplastin antecedent) (PTA) [Cleaved into: Coagulation factor XIa heavy chain; Coagulation factor XIa light chain]	F11	Homo sapiens (Human)	625
APOA4_HUMAN	Protein	APOA4_HUMAN	P06727	APOA4_HUMAN	Apolipoprotein A-IV (Apo-AIV) (ApoA-IV) (Apolipoprotein A4)	APOA4	Homo sapiens (Human)	396
APOC4_HUMAN	Protein	APOC4_HUMAN	P55056	APOC4_HUMAN	Apolipoprotein C-IV (Apo-CIV) (ApoC-IV) (Apolipoprotein C4)	APOC4	Homo sapiens (Human)	127
HPT_HUMAN	Protein	HPT_HUMAN	P00738	HPT_HUMAN	Haptoglobin (Zonulin) [Cleaved into: Haptoglobin alpha chain; Haptoglobin beta chain]	HP	Homo sapiens (Human)	406
GELS_HUMAN	Protein	GELS_HUMAN	P06396	GELS_HUMAN	Gelsolin (AGEL) (Actin-depolymerizing factor) (ADF) (Brevin)	GSN	Homo sapiens (Human)	782
APOC2_HUMAN	Protein	APOC2_HUMAN	P02655	APOC2_HUMAN	Apolipoprotein C-II (Apo-CII) (ApoC-II) (Apolipoprotein C2) [Cleaved into: Proapolipoprotein C-II (ProapoC-II)]	APOC2 APC2	Homo sapiens (Human)	101
LBP_HUMAN	Protein	LBP_HUMAN	P18428	LBP_HUMAN	Lipopolysaccharide-binding protein (LBP)	LBP	Homo sapiens (Human)	481
SAA4_HUMAN	Protein	SAA4_HUMAN	P35542	SAA4_HUMAN	Serum amyloid A-4 protein (Constitutively expressed serum amyloid A protein) (C-SAA)	SAA4 CSAA	Homo sapiens (Human)	130
HV307_HUMAN	Protein	HV307_HUMAN	P01780	HV307_HUMAN	Immunoglobulin heavy variable 3-7 (Ig heavy chain V-III region GAL) (Ig heavy chain V-III region GAR) (Ig heavy chain V-III region JON)	IGHV3-7	Homo sapiens (Human)	117
TRFE_HUMAN	Protein	TRFE_HUMAN	P02787	TRFE_HUMAN	Serotransferrin (Transferrin) (Beta-1 metal-binding globulin) (Siderophilin)	TF PRO1400	Homo sapiens (Human)	698
APOD_HUMAN	Protein	APOD_HUMAN	P05090	APOD_HUMAN	Apolipoprotein D (Apo-D) (ApoD)	APOD	Homo sapiens (Human)	189
HPTR_HUMAN	Protein	HPTR_HUMAN	P00739	HPTR_HUMAN	Haptoglobin-related protein	HPR	Homo sapiens (Human)	348
HV374_HUMAN	Protein	HV374_HUMAN	A0A0B4J1X5	HV374_HUMAN	Immunoglobulin heavy variable 3-74	IGHV3-74	Homo sapiens (Human)	117
KV320_HUMAN	Protein	KV320_HUMAN	P01619	KV320_HUMAN	Immunoglobulin kappa variable 3-20 (Ig kappa chain V-III region B6) (Ig kappa chain V-III region GOL) (Ig kappa chain V-III region HAH) (Ig kappa chain V-III region HIC) (Ig kappa chain V-III region IARC/BL41) (Ig kappa chain V-III region NG9) (Ig kappa chain V-III region SIE) (Ig kappa chain V-III region Ti) (Ig kappa chain V-III region WOL)	IGKV3-20	Homo sapiens (Human)	116
PON1_HUMAN	Protein	PON1_HUMAN	P27169	PON1_HUMAN	Serum paraoxonase/arylesterase 1 (PON 1) (EC 3.1.1.2) (EC 3.1.1.81) (EC 3.1.8.1) (Aromatic esterase 1) (A-esterase 1) (K-45) (Serum aryldialkylphosphatase 1)	PON1 PON	Homo sapiens (Human)	355
CD5L_HUMAN	Protein	CD5L_HUMAN	O43866	CD5L_HUMAN	CD5 antigen-like (Apoptosis inhibitor expressed by macrophages) (hAIM) (CT-2) (IgM-associated peptide) (SP-alpha)	CD5L API6 UNQ203/PRO229	Homo sapiens (Human)	347
CO4A_HUMAN	Protein	CO4A_HUMAN	P0C0L4	CO4A_HUMAN	Complement C4-A (Acidic complement C4) (C3 and PZP-like alpha-2-macroglobulin domain-containing protein 2) [Cleaved into: Complement C4 beta chain; Complement C4-A alpha chain; C4a anaphylatoxin; C4b-A; C4d-A; Complement C4 gamma chain]	C4A CO4 CPAMD2	Homo sapiens (Human)	1744
IC1_HUMAN	Protein	IC1_HUMAN	P05155	IC1_HUMAN	Plasma protease C1 inhibitor (C1 Inh) (C1Inh) (C1 esterase inhibitor) (C1-inhibiting factor) (Serpin G1)	SERPING1 C1IN C1NH	Homo sapiens (Human)	500
IGHA2_HUMAN	Protein	IGHA2_HUMAN	P01877	IGHA2_HUMAN	Immunoglobulin heavy constant alpha 2 (Ig alpha-2 chain C region) (Ig alpha-2 chain C region BUT) (Ig alpha-2 chain C region LAN)	IGHA2	Homo sapiens (Human)	391
KLKB1_HUMAN	Protein	KLKB1_HUMAN	P03952	KLKB1_HUMAN	Plasma kallikrein (EC 3.4.21.34) (Fletcher factor) (Kininogenin) (Plasma prekallikrein) (PKK) [Cleaved into: Plasma kallikrein heavy chain; Plasma kallikrein light chain]	KLKB1 KLK3	Homo sapiens (Human)	638
C1QC_HUMAN	Protein	C1QC_HUMAN	P02747	C1QC_HUMAN	Complement C1q subcomponent subunit C	C1QC C1QG	Homo sapiens (Human)	245
TFR1_HUMAN	Protein	TFR1_HUMAN	P02786	TFR1_HUMAN	Transferrin receptor protein 1 (TR) (TfR) (TfR1) (Trfr) (T9) (p90) (CD antigen CD71) [Cleaved into: Transferrin receptor protein 1, serum form (sTfR)]	TFRC	Homo sapiens (Human)	760
IGHG4_HUMAN	Protein	IGHG4_HUMAN	P01861	IGHG4_HUMAN	Immunoglobulin heavy constant gamma 4 (Ig gamma-4 chain C region)	IGHG4	Homo sapiens (Human)	396
C1QB_HUMAN	Protein	C1QB_HUMAN	P02746	C1QB_HUMAN	Complement C1q subcomponent subunit B	C1QB	Homo sapiens (Human)	253
CO6_HUMAN	Protein	CO6_HUMAN	P13671	CO6_HUMAN	Complement component C6	C6	Homo sapiens (Human)	934
FETUA_HUMAN	Protein	FETUA_HUMAN	P02765	FETUA_HUMAN	Alpha-2-HS-glycoprotein (Alpha-2-Z-globulin) (Ba-alpha-2-glycoprotein) (Fetuin-A) [Cleaved into: Alpha-2-HS-glycoprotein chain A; Alpha-2-HS-glycoprotein chain B]	AHSG FETUA PRO2743	Homo sapiens (Human)	367
APOL1_HUMAN	Protein	APOL1_HUMAN	O14791	APOL1_HUMAN	Apolipoprotein L1 (Apolipoprotein L) (Apo-L) (ApoL) (Apolipoprotein L-I) (ApoL-I)	APOL1 APOL	Homo sapiens (Human)	398
CO8B_HUMAN	Protein	CO8B_HUMAN	P07358	CO8B_HUMAN	Complement component C8 beta chain (Complement component 8 subunit beta)	C8B	Homo sapiens (Human)	591
A2AP_HUMAN	Protein	A2AP_HUMAN	P08697	A2AP_HUMAN	Alpha-2-antiplasmin (Alpha-2-AP) (Alpha-2-plasmin inhibitor) (Alpha-2-PI) (Serpin F2)	SERPINF2 AAP PLI	Homo sapiens (Human)	491
C4BPA_HUMAN	Protein	C4BPA_HUMAN	P04003	C4BPA_HUMAN	C4b-binding protein alpha chain (C4bp) (Proline-rich protein) (PRP)	C4BPA C4BP	Homo sapiens (Human)	597
THRB_HUMAN	Protein	THRB_HUMAN	P00734	THRB_HUMAN	Prothrombin (EC 3.4.21.5) (Coagulation factor II) [Cleaved into: Activation peptide fragment 1; Activation peptide fragment 2; Thrombin light chain; Thrombin heavy chain]	F2	Homo sapiens (Human)	622
FCN1_HUMAN	Protein	FCN1_HUMAN	O00602	FCN1_HUMAN	Ficolin-1 (Collagen/fibrinogen domain-containing protein 1) (Ficolin-A) (Ficolin-alpha) (M-ficolin)	FCN1 FCNM	Homo sapiens (Human)	326
IGHG3_HUMAN	Protein	IGHG3_HUMAN	P01860	IGHG3_HUMAN	Immunoglobulin heavy constant gamma 3 (HDC) (Heavy chain disease protein) (Ig gamma-3 chain C region)	IGHG3	Homo sapiens (Human)	446
SAMP_HUMAN	Protein	SAMP_HUMAN	P02743	SAMP_HUMAN	Serum amyloid P-component (SAP) (9.5S alpha-1-glycoprotein) [Cleaved into: Serum amyloid P-component(1-203)]	APCS PTX2	Homo sapiens (Human)	223
CO7_HUMAN	Protein	CO7_HUMAN	P10643	CO7_HUMAN	Complement component C7	C7	Homo sapiens (Human)	843
BPIB1_HUMAN	Protein	BPIB1_HUMAN	Q8TDL5	BPIB1_HUMAN	BPI fold-containing family B member 1 (Long palate, lung and nasal epithelium carcinoma-associated protein 1) (von Ebner minor salivary gland protein) (VEMSGP)	BPIFB1 C20orf114 LPLUNC1 UNQ706/PRO1357	Homo sapiens (Human)	484
APOH_HUMAN	Protein	APOH_HUMAN	P02749	APOH_HUMAN	Beta-2-glycoprotein 1 (APC inhibitor) (Activated protein C-binding protein) (Anticardiolipin cofactor) (Apolipoprotein H) (Apo-H) (Beta-2-glycoprotein I) (B2GPI) (Beta(2)GPI)	APOH B2G1	Homo sapiens (Human)	345
CETP_HUMAN	Protein	CETP_HUMAN	P11597	CETP_HUMAN	Cholesteryl ester transfer protein (Lipid transfer protein I)	CETP	Homo sapiens (Human)	493
URP2_HUMAN	Protein	URP2_HUMAN	Q86UX7	URP2_HUMAN	Fermitin family homolog 3 (Kindlin-3) (MIG2-like protein) (Unc-112-related protein 2)	FERMT3 KIND3 MIG2B URP2	Homo sapiens (Human)	667
PLMN_HUMAN	Protein	PLMN_HUMAN	P00747	PLMN_HUMAN	Plasminogen (EC 3.4.21.7) [Cleaved into: Plasmin heavy chain A; Activation peptide; Angiostatin; Plasmin heavy chain A, short form; Plasmin light chain B]	PLG	Homo sapiens (Human)	810
CFAB_HUMAN	Protein	CFAB_HUMAN	P00751	CFAB_HUMAN	Complement factor B (EC 3.4.21.47) (C3/C5 convertase) (Glycine-rich beta glycoprotein) (GBG) (PBF2) (Properdin factor B) [Cleaved into: Complement factor B Ba fragment; Complement factor B Bb fragment]	CFB BF BFD	Homo sapiens (Human)	764
LV151_HUMAN	Protein	LV151_HUMAN	P01701	LV151_HUMAN	Immunoglobulin lambda variable 1-51 (Ig lambda chain V-I region BL2) (Ig lambda chain V-I region EPS) (Ig lambda chain V-I region NEW) (Ig lambda chain V-I region NIG-64)	IGLV1-51	Homo sapiens (Human)	117
AMBP_HUMAN	Protein	AMBP_HUMAN	P02760	AMBP_HUMAN	Protein AMBP (Protein HC) [Cleaved into: Alpha-1-microglobulin (EC 1.6.2.-) (Alpha-1 microglycoprotein) (Complex-forming glycoprotein heterogeneous in charge); Inter-alpha-trypsin inhibitor light chain (ITI-LC) (Bikunin) (EDC1) (HI-30) (Uronic-acid-rich protein); Trypstatin]	AMBP HCP ITIL	Homo sapiens (Human)	352
APOA5_HUMAN	Protein	APOA5_HUMAN	Q6Q788	APOA5_HUMAN	Apolipoprotein A-V (Apo-AV) (ApoA-V) (Apolipoprotein A5) (Regeneration-associated protein 3)	APOA5 RAP3 UNQ411/PRO773	Homo sapiens (Human)	366
S10A8_HUMAN	Protein	S10A8_HUMAN	P05109	S10A8_HUMAN	Protein S100-A8 (Calgranulin-A) (Calprotectin L1L subunit) (Cystic fibrosis antigen) (CFAG) (Leukocyte L1 complex light chain) (Migration inhibitory factor-related protein 8) (MRP-8) (p8) (S100 calcium-binding protein A8) (Urinary stone protein band A)	S100A8 CAGA CFAG MRP8	Homo sapiens (Human)	93
LG3BP_HUMAN	Protein	LG3BP_HUMAN	Q08380	LG3BP_HUMAN	Galectin-3-binding protein (Basement membrane autoantigen p105) (Lectin galactoside-binding soluble 3-binding protein) (Mac-2-binding protein) (MAC2BP) (Mac-2 BP) (Tumor-associated antigen 90K)	LGALS3BP M2BP	Homo sapiens (Human)	585
FCN2_HUMAN	Protein	FCN2_HUMAN	Q15485	FCN2_HUMAN	Ficolin-2 (37 kDa elastin-binding protein) (Collagen/fibrinogen domain-containing protein 2) (EBP-37) (Ficolin-B) (Ficolin-beta) (Hucolin) (L-ficolin) (Serum lectin p35)	FCN2 FCNL	Homo sapiens (Human)	313
SAA1_HUMAN	Protein	SAA1_HUMAN	P0DJI8	SAA1_HUMAN	Serum amyloid A-1 protein (SAA) [Cleaved into: Amyloid protein A (Amyloid fibril protein AA); Serum amyloid protein A(2-104); Serum amyloid protein A(3-104); Serum amyloid protein A(2-103); Serum amyloid protein A(2-102); Serum amyloid protein A(4-101)]	SAA1	Homo sapiens (Human)	122
FA5_HUMAN	Protein	FA5_HUMAN	P12259	FA5_HUMAN	Coagulation factor V (Activated protein C cofactor) (Proaccelerin, labile factor) [Cleaved into: Coagulation factor V heavy chain; Coagulation factor V light chain]	F5	Homo sapiens (Human)	2224
CFAH_HUMAN	Protein	CFAH_HUMAN	P08603	CFAH_HUMAN	Complement factor H (H factor 1)	CFH HF HF1 HF2	Homo sapiens (Human)	1231
IGHD_HUMAN	Protein	IGHD_HUMAN	P01880	IGHD_HUMAN	Immunoglobulin heavy constant delta (Ig delta chain C region) (Ig delta chain C region NIG-65) (Ig delta chain C region WAH)	IGHD	Homo sapiens (Human)	430
APOF_HUMAN	Protein	APOF_HUMAN	Q13790	APOF_HUMAN	Apolipoprotein F (Apo-F) (Lipid transfer inhibitor protein) (LTIP)	APOF	Homo sapiens (Human)	326
CAMP_HUMAN	Protein	CAMP_HUMAN	P49913	CAMP_HUMAN	Cathelicidin antimicrobial peptide (18 kDa cationic antimicrobial protein) (CAP-18) (hCAP-18) [Cleaved into: Antibacterial peptide FALL-39 (FALL-39 peptide antibiotic); Antibacterial peptide LL-37; Antibacterial peptide KR-20; Antibacterial peptide LL-23; Antibacterial peptide LL-29; Antibacterial peptide KS-30; Antibacterial peptide RK-31; Antibacterial peptide FF-33]	CAMP CAP18 FALL39 HSD26	Homo sapiens (Human)	170
PCYOX_HUMAN	Protein	PCYOX_HUMAN	Q9UHG3	PCYOX_HUMAN	Prenylcysteine oxidase 1 (EC 1.8.3.5) (Prenylcysteine lyase)	PCYOX1 KIAA0908 PCL1 UNQ597/PRO1183	Homo sapiens (Human)	505
CADH1_HUMAN	Protein	CADH1_HUMAN	P12830	CADH1_HUMAN	Cadherin-1 (CAM 120/80) (Epithelial cadherin) (E-cadherin) (Uvomorulin) (CD antigen CD324) [Cleaved into: E-Cad/CTF1; E-Cad/CTF2; E-Cad/CTF3]	CDH1 CDHE UVO	Homo sapiens (Human)	882
VWF_HUMAN	Protein	VWF_HUMAN	P04275	VWF_HUMAN	von Willebrand factor (vWF) [Cleaved into: von Willebrand antigen 2 (von Willebrand antigen II)]	VWF F8VWF	Homo sapiens (Human)	2813
C1QA_HUMAN	Protein	C1QA_HUMAN	P02745	C1QA_HUMAN	Complement C1q subcomponent subunit A	C1QA	Homo sapiens (Human)	245
GPX3_HUMAN	Protein	GPX3_HUMAN	P22352	GPX3_HUMAN	Glutathione peroxidase 3 (GPx-3) (GSHPx-3) (EC 1.11.1.9) (Extracellular glutathione peroxidase) (Plasma glutathione peroxidase) (GPx-P) (GSHPx-P)	GPX3 GPXP	Homo sapiens (Human)	226
FA12_HUMAN	Protein	FA12_HUMAN	P00748	FA12_HUMAN	Coagulation factor XII (EC 3.4.21.38) (Hageman factor) (HAF) [Cleaved into: Coagulation factor XIIa heavy chain; Beta-factor XIIa part 1; Coagulation factor XIIa light chain (Beta-factor XIIa part 2)]	F12	Homo sapiens (Human)	615
KAIN_HUMAN	Protein	KAIN_HUMAN	P29622	KAIN_HUMAN	Kallistatin (Kallikrein inhibitor) (Peptidase inhibitor 4) (PI-4) (Serpin A4)	SERPINA4 KST PI4	Homo sapiens (Human)	427
C1R_HUMAN	Protein	C1R_HUMAN	P00736	C1R_HUMAN	Complement C1r subcomponent (EC 3.4.21.41) (Complement component 1 subcomponent r) [Cleaved into: Complement C1r subcomponent heavy chain; Complement C1r subcomponent light chain]	C1R	Homo sapiens (Human)	705
PROS_HUMAN	Protein	PROS_HUMAN	P07225	PROS_HUMAN	Vitamin K-dependent protein S	PROS1 PROS	Homo sapiens (Human)	676
C1S_HUMAN	Protein	C1S_HUMAN	P09871	C1S_HUMAN	Complement C1s subcomponent (EC 3.4.21.42) (C1 esterase) (Complement component 1 subcomponent s) [Cleaved into: Complement C1s subcomponent heavy chain; Complement C1s subcomponent light chain]	C1S	Homo sapiens (Human)	688
PIGR_HUMAN	Protein	PIGR_HUMAN	P01833	PIGR_HUMAN	Polymeric immunoglobulin receptor (PIgR) (Poly-Ig receptor) (Hepatocellular carcinoma-associated protein TB6) [Cleaved into: Secretory component]	PIGR	Homo sapiens (Human)	764
CPN2_HUMAN	Protein	CPN2_HUMAN	P22792	CPN2_HUMAN	Carboxypeptidase N subunit 2 (Carboxypeptidase N 83 kDa chain) (Carboxypeptidase N large subunit) (Carboxypeptidase N polypeptide 2) (Carboxypeptidase N regulatory subunit)	CPN2 ACBP	Homo sapiens (Human)	545
HV372_HUMAN	Protein	HV372_HUMAN	A0A0B4J1Y9	HV372_HUMAN	Immunoglobulin heavy variable 3-72	IGHV3-72	Homo sapiens (Human)	119
FA10_HUMAN	Protein	FA10_HUMAN	P00742	FA10_HUMAN	Coagulation factor X (EC 3.4.21.6) (Stuart factor) (Stuart-Prower factor) [Cleaved into: Factor X light chain; Factor X heavy chain; Activated factor Xa heavy chain]	F10	Homo sapiens (Human)	488
LV218_HUMAN	Protein	LV218_HUMAN	A0A075B6J9	LV218_HUMAN	Immunoglobulin lambda variable 2-18	IGLV2-18	Homo sapiens (Human)	118
CBPN_HUMAN	Protein	CBPN_HUMAN	P15169	CBPN_HUMAN	Carboxypeptidase N catalytic chain (CPN) (EC 3.4.17.3) (Anaphylatoxin inactivator) (Arginine carboxypeptidase) (Carboxypeptidase N polypeptide 1) (Carboxypeptidase N small subunit) (Kininase-1) (Lysine carboxypeptidase) (Plasma carboxypeptidase B) (Serum carboxypeptidase N) (SCPN)	CPN1 ACBP	Homo sapiens (Human)	458
IPSP_HUMAN	Protein	IPSP_HUMAN	P05154	IPSP_HUMAN	Plasma serine protease inhibitor (Acrosomal serine protease inhibitor) (Plasminogen activator inhibitor 3) (PAI-3) (PAI3) (Protein C inhibitor) (PCI) (Serpin A5)	SERPINA5 PCI PLANH3 PROCI	Homo sapiens (Human)	406
IBP3_HUMAN	Protein	IBP3_HUMAN	P17936	IBP3_HUMAN	Insulin-like growth factor-binding protein 3 (IBP-3) (IGF-binding protein 3) (IGFBP-3)	IGFBP3 IBP3	Homo sapiens (Human)	291
IBP2_HUMAN	Protein	IBP2_HUMAN	P18065	IBP2_HUMAN	Insulin-like growth factor-binding protein 2 (IBP-2) (IGF-binding protein 2) (IGFBP-2)	IGFBP2 BP2 IBP2	Homo sapiens (Human)	325
FCN3_HUMAN	Protein	FCN3_HUMAN	O75636	FCN3_HUMAN	Ficolin-3 (Collagen/fibrinogen domain-containing lectin 3 p35) (Collagen/fibrinogen domain-containing protein 3) (Hakata antigen)	FCN3 FCNH HAKA1	Homo sapiens (Human)	299
C4BPB_HUMAN	Protein	C4BPB_HUMAN	P20851	C4BPB_HUMAN	C4b-binding protein beta chain	C4BPB	Homo sapiens (Human)	252
PHLD_HUMAN	Protein	PHLD_HUMAN	P80108	PHLD_HUMAN	Phosphatidylinositol-glycan-specific phospholipase D (PI-G PLD) (EC 3.1.4.50) (Glycoprotein phospholipase D) (Glycosyl-phosphatidylinositol-specific phospholipase D) (GPI-PLD) (GPI-specific phospholipase D)	GPLD1 PIGPLD1	Homo sapiens (Human)	840
KV116_HUMAN	Protein	KV116_HUMAN	P04430	KV116_HUMAN	Immunoglobulin kappa variable 1-16 (Ig kappa chain V-I region BAN)	IGKV1-16	Homo sapiens (Human)	117
LV319_HUMAN	Protein	LV319_HUMAN	P01714	LV319_HUMAN	Immunoglobulin lambda variable 3-19 (Ig lambda chain V-III region SH)	IGLV3-19	Homo sapiens (Human)	112
AMD_HUMAN	Protein	AMD_HUMAN	P19021	AMD_HUMAN	Peptidyl-glycine alpha-amidating monooxygenase (PAM) [Includes: Peptidylglycine alpha-hydroxylating monooxygenase (PHM) (EC 1.14.17.3); Peptidyl-alpha-hydroxyglycine alpha-amidating lyase (EC 4.3.2.5) (Peptidylamidoglycolate lyase) (PAL)]	PAM	Homo sapiens (Human)	973
CXCL7_HUMAN	Protein	CXCL7_HUMAN	P02775	CXCL7_HUMAN	Platelet basic protein (PBP) (C-X-C motif chemokine 7) (Leukocyte-derived growth factor) (LDGF) (Macrophage-derived growth factor) (MDGF) (Small-inducible cytokine B7) [Cleaved into: Connective tissue-activating peptide III (CTAP-III) (LA-PF4) (Low-affinity platelet factor IV); TC-2; Connective tissue-activating peptide III(1-81) (CTAP-III(1-81)); Beta-thromboglobulin (Beta-TG); Neutrophil-activa…	PPBP CTAP3 CXCL7 SCYB7 TGB1 THBGB1	Homo sapiens (Human)	128
ANTR2_HUMAN	Protein	ANTR2_HUMAN	P58335	ANTR2_HUMAN	Anthrax toxin receptor 2 (Capillary morphogenesis gene 2 protein) (CMG-2)	ANTXR2 CMG2	Homo sapiens (Human)	489
MASP2_HUMAN	Protein	MASP2_HUMAN	O00187	MASP2_HUMAN	Mannan-binding lectin serine protease 2 (EC 3.4.21.104) (MBL-associated serine protease 2) (Mannose-binding protein-associated serine protease 2) (MASP-2) [Cleaved into: Mannan-binding lectin serine protease 2 A chain; Mannan-binding lectin serine protease 2 B chain]	MASP2	Homo sapiens (Human)	686
FETUB_HUMAN	Protein	FETUB_HUMAN	Q9UGM5	FETUB_HUMAN	Fetuin-B (16G2) (Fetuin-like protein IRL685) (Gugu)	FETUB	Homo sapiens (Human)	382
PRAP1_HUMAN	Protein	PRAP1_HUMAN	Q96NZ9	PRAP1_HUMAN	Proline-rich acidic protein 1 (Epididymis tissue protein Li 178) (Uterine-specific proline-rich acidic protein)	PRAP1 UPA UNQ608/PRO1195	Homo sapiens (Human)	151
KRT36_HUMAN	Protein	KRT36_HUMAN	O76013	KRT36_HUMAN	Keratin, type I cuticular Ha6 (Hair keratin, type I Ha6) (Keratin-36) (K36)	KRT36 HHA6 HKA6 KRTHA6	Homo sapiens (Human)	467
RELN_HUMAN	Protein	RELN_HUMAN	P78509	RELN_HUMAN	Reelin (EC 3.4.21.-)	RELN	Homo sapiens (Human)	3460
KRT35_HUMAN	Protein	KRT35_HUMAN	Q92764	KRT35_HUMAN	Keratin, type I cuticular Ha5 (Hair keratin, type I Ha5) (Keratin-35) (K35)	KRT35 HHA5 HKA5 KRTHA5	Homo sapiens (Human)	455
SAA2_HUMAN	Protein	SAA2_HUMAN	P0DJI9	SAA2_HUMAN	Serum amyloid A-2 protein (SAA2) [Cleaved into: Amyloid A2 protein (AA2)]	SAA2	Homo sapiens (Human)	122
PON3_HUMAN	Protein	PON3_HUMAN	Q15166	PON3_HUMAN	Serum paraoxonase/lactonase 3 (EC 3.1.1.2) (EC 3.1.1.81) (EC 3.1.8.1)	PON3	Homo sapiens (Human)	354
CYTC_HUMAN	Protein	CYTC_HUMAN	P01034	CYTC_HUMAN	Cystatin-C (Cystatin-3) (Gamma-trace) (Neuroendocrine basic polypeptide) (Post-gamma-globulin)	CST3	Homo sapiens (Human)	146
FHR4_HUMAN	Protein	FHR4_HUMAN	Q92496	FHR4_HUMAN	Complement factor H-related protein 4 (FHR-4)	CFHR4 CFHL4 FHR4	Homo sapiens (Human)	578
KRT85_HUMAN	Protein	KRT85_HUMAN	P78386	KRT85_HUMAN	Keratin, type II cuticular Hb5 (Hair keratin K2.12) (Keratin-85) (K85) (Type II hair keratin Hb5) (Type-II keratin Kb25)	KRT85 KRTHB5	Homo sapiens (Human)	507
HexCer d18:1/22:0	Lipid	Ceramide
Free Cholesterol	Lipid	Cholesterol
CE(16:0)	Lipid	Cholesteryl ester
CE(18:2)	Lipid	Cholesteryl ester
FA 18:3	Lipid	Fatty Acid
FA 20:5	Lipid	Fatty Acid
PC(O-14:0/2:0)	Lipid	Phosphatidylcholine
PI 40:6	Lipid	Phosphatidylinositol
PS O-35:2	Lipid	Phosphatidylserine
PS O-38:2	Lipid	Phosphatidylserine
SM(18:1/16:1)	Lipid	Sphingomyelin
SM(d18:1/16:0)	Lipid	Sphingomyelin
SM(d18:1/18:1)	Lipid	Sphingomyelin
SM(d18:1/22:1)	Lipid	Sphingomyelin
SM(d18:1/22:0)	Lipid	Sphingomyelin
SM(d18:1/23:0)	Lipid	Sphingomyelin
SM(d18:1/24:1)	Lipid	Sphingomyelin
SM(d18:1/24:0)	Lipid	Sphingomyelin
SM(18:1/20:0)	Lipid	Sphingomyelin
SM(18:0/18:0)	Lipid	Sphingomyelin
SM(18:0/22:0)	Lipid	Sphingomyelin
TG 48:2; TG(16:0/16:1/16:1)	Lipid	Triacylglycerol
TG 50:2; TG(16:0/18:1/16:1)	Lipid	Triacylglycerol
TG 51:2; TG(16:0/17:1/18:1)	Lipid	Triacylglycerol
TG 52:4; TG(16:0/18:2/18:2)	Lipid	Triacylglycerol
TG 52:3; TG(16:0/18:1/18:2)	Lipid	Triacylglycerol
TG 52:3; TG(16:0/16:0/20:3)	Lipid	Triacylglycerol
TG 54:6; TG(18:2/18:2/18:2)	Lipid	Triacylglycerol
TG 54:4; TG(16:0/20:2/18:2)	Lipid	Triacylglycerol
TG 54:0; TG(18:0/18:0/18:0)	Lipid	Triacylglycerol
TG 56:8; TG(18:2/20:4/18:2)	Lipid	Triacylglycerol
