# Supplementary material for: Sources of biases in the in vitro testing of nanomaterials: the role of the biomolecular corona
Source: Royal Society of Chemistry journal article supplement (doi:10.1039/d3nh00510k), 2024-01-01
Supplement: d3nh00510k8.xlsx [file d3nh00510k8.xlsx]

## Sheet: GO
#term ID	term description	observed gene count	background gene count	strength	false discovery rate	matching proteins in your network (IDs)	matching proteins in your network (labels)
CL:18723	Mixed, incl. Complement and coagulation cascades, and Protein-lipid complex	55	196	1.3	9.55e-47	9606.ENSP00000168148,9606.ENSP00000200676,9606.ENSP00000205948,9606.ENSP00000215727,9606.ENSP00000218099,9606.ENSP00000222381,9606.ENSP00000223642,9606.ENSP00000227667,9606.ENSP00000232003,9606.ENSP00000236850,9606.ENSP00000243077,9606.ENSP00000245907,9606.ENSP00000253496,9606.ENSP00000255040,9606.ENSP00000259396,9606.ENSP00000261405,9606.ENSP00000263408,9606.ENSP00000264005,9606.ENSP00000265983,…	SPP2,CETP,APOH,SERPIND1,F9,PON1,C5,APOC3,HRG,APOA1,LRP1,C3,F12,APCS,ORM1,VWF,C9,LCAT,HPX,FCN2,MASP1,C2,F2,STAB1,C1QB,CLU,APOL1,CPN2,SERPINF2,C7,A2M,SERPINA5,SERPINA6,ITIH2,C8A,CFH,ANGPTL3,C8B,C8G,FCN1,C1QC,F10,F7,PROS1,APOF,TF,RELN,ITIH3,C4B,SERPINA1,CFB,HPR,C1R,APOC2,APOC4
CL:18724	Mixed, incl. Complement and coagulation cascades, and Protein-lipid complex	53	172	1.34	9.55e-47	9606.ENSP00000168148,9606.ENSP00000200676,9606.ENSP00000205948,9606.ENSP00000215727,9606.ENSP00000218099,9606.ENSP00000222381,9606.ENSP00000223642,9606.ENSP00000227667,9606.ENSP00000232003,9606.ENSP00000236850,9606.ENSP00000243077,9606.ENSP00000245907,9606.ENSP00000253496,9606.ENSP00000255040,9606.ENSP00000259396,9606.ENSP00000261405,9606.ENSP00000263408,9606.ENSP00000264005,9606.ENSP00000265983,…	SPP2,CETP,APOH,SERPIND1,F9,PON1,C5,APOC3,HRG,APOA1,LRP1,C3,F12,APCS,ORM1,VWF,C9,LCAT,HPX,FCN2,MASP1,C2,F2,C1QB,CLU,APOL1,CPN2,SERPINF2,C7,A2M,SERPINA5,SERPINA6,ITIH2,C8A,CFH,ANGPTL3,C8B,C8G,FCN1,C1QC,F10,F7,APOF,TF,RELN,ITIH3,C4B,SERPINA1,CFB,HPR,C1R,APOC2,APOC4
CL:18726	Complement and coagulation cascades, and Protein-lipid complex	52	161	1.36	9.55e-47	9606.ENSP00000200676,9606.ENSP00000205948,9606.ENSP00000215727,9606.ENSP00000218099,9606.ENSP00000222381,9606.ENSP00000223642,9606.ENSP00000227667,9606.ENSP00000232003,9606.ENSP00000236850,9606.ENSP00000243077,9606.ENSP00000245907,9606.ENSP00000253496,9606.ENSP00000255040,9606.ENSP00000259396,9606.ENSP00000261405,9606.ENSP00000263408,9606.ENSP00000264005,9606.ENSP00000265983,9606.ENSP00000291744,…	CETP,APOH,SERPIND1,F9,PON1,C5,APOC3,HRG,APOA1,LRP1,C3,F12,APCS,ORM1,VWF,C9,LCAT,HPX,FCN2,MASP1,C2,F2,C1QB,CLU,APOL1,CPN2,SERPINF2,C7,A2M,SERPINA5,SERPINA6,ITIH2,C8A,CFH,ANGPTL3,C8B,C8G,FCN1,C1QC,F10,F7,APOF,TF,RELN,ITIH3,C4B,SERPINA1,CFB,HPR,C1R,APOC2,APOC4
CL:18727	Complement and coagulation cascades, and Positive regulation of opsonization	38	115	1.37	4.2e-34	9606.ENSP00000215727,9606.ENSP00000218099,9606.ENSP00000223642,9606.ENSP00000232003,9606.ENSP00000243077,9606.ENSP00000245907,9606.ENSP00000253496,9606.ENSP00000255040,9606.ENSP00000259396,9606.ENSP00000261405,9606.ENSP00000263408,9606.ENSP00000265983,9606.ENSP00000291744,9606.ENSP00000296280,9606.ENSP00000299367,9606.ENSP00000308541,9606.ENSP00000313967,9606.ENSP00000319464,9606.ENSP00000321853,…	SERPIND1,F9,C5,HRG,LRP1,C3,F12,APCS,ORM1,VWF,C9,HPX,FCN2,MASP1,C2,F2,C1QB,CPN2,SERPINF2,C7,A2M,SERPINA5,SERPINA6,ITIH2,C8A,CFH,C8B,C8G,FCN1,C1QC,F10,F7,TF,ITIH3,C4B,SERPINA1,CFB,C1R
CL:18728	Complement and coagulation cascades, and Positive regulation of opsonization	37	109	1.39	1.41e-33	9606.ENSP00000215727,9606.ENSP00000218099,9606.ENSP00000223642,9606.ENSP00000232003,9606.ENSP00000243077,9606.ENSP00000245907,9606.ENSP00000253496,9606.ENSP00000255040,9606.ENSP00000259396,9606.ENSP00000261405,9606.ENSP00000263408,9606.ENSP00000265983,9606.ENSP00000291744,9606.ENSP00000296280,9606.ENSP00000299367,9606.ENSP00000308541,9606.ENSP00000313967,9606.ENSP00000321853,9606.ENSP00000322061,…	SERPIND1,F9,C5,HRG,LRP1,C3,F12,APCS,ORM1,VWF,C9,HPX,FCN2,MASP1,C2,F2,C1QB,SERPINF2,C7,A2M,SERPINA5,SERPINA6,ITIH2,C8A,CFH,C8B,C8G,FCN1,C1QC,F10,F7,TF,ITIH3,C4B,SERPINA1,CFB,C1R
CL:18846	Complement cascade	18	50	1.41	7.79e-16	9606.ENSP00000223642,9606.ENSP00000245907,9606.ENSP00000255040,9606.ENSP00000263408,9606.ENSP00000291744,9606.ENSP00000296280,9606.ENSP00000299367,9606.ENSP00000313967,9606.ENSP00000322061,9606.ENSP00000354458,9606.ENSP00000356399,9606.ENSP00000360281,9606.ENSP00000360697,9606.ENSP00000360871,9606.ENSP00000363770,9606.ENSP00000415941,9606.ENSP00000416561,9606.ENSP00000444271	C5,C3,APCS,C9,FCN2,MASP1,C2,C1QB,C7,C8A,CFH,C8B,C8G,FCN1,C1QC,C4B,CFB,C1R
CL:18848	Complement cascade	17	40	1.48	7.79e-16	9606.ENSP00000223642,9606.ENSP00000245907,9606.ENSP00000263408,9606.ENSP00000291744,9606.ENSP00000296280,9606.ENSP00000299367,9606.ENSP00000313967,9606.ENSP00000322061,9606.ENSP00000354458,9606.ENSP00000356399,9606.ENSP00000360281,9606.ENSP00000360697,9606.ENSP00000360871,9606.ENSP00000363770,9606.ENSP00000415941,9606.ENSP00000416561,9606.ENSP00000444271	C5,C3,C9,FCN2,MASP1,C2,C1QB,C7,C8A,CFH,C8B,C8G,FCN1,C1QC,C4B,CFB,C1R
CL:18730	Hemostasis, and Dissolution of Fibrin Clot	18	55	1.37	2.57e-15	9606.ENSP00000215727,9606.ENSP00000218099,9606.ENSP00000232003,9606.ENSP00000243077,9606.ENSP00000253496,9606.ENSP00000259396,9606.ENSP00000261405,9606.ENSP00000265983,9606.ENSP00000308541,9606.ENSP00000321853,9606.ENSP00000323929,9606.ENSP00000333203,9606.ENSP00000351190,9606.ENSP00000364709,9606.ENSP00000364731,9606.ENSP00000385834,9606.ENSP00000415769,9606.ENSP00000416066	SERPIND1,F9,HRG,LRP1,F12,ORM1,VWF,HPX,F2,SERPINF2,A2M,SERPINA5,ITIH2,F10,F7,TF,ITIH3,SERPINA1
CL:18731	Hemostasis, and Dissolution of Fibrin Clot	17	50	1.39	1.16e-14	9606.ENSP00000215727,9606.ENSP00000218099,9606.ENSP00000232003,9606.ENSP00000243077,9606.ENSP00000253496,9606.ENSP00000259396,9606.ENSP00000261405,9606.ENSP00000265983,9606.ENSP00000308541,9606.ENSP00000321853,9606.ENSP00000323929,9606.ENSP00000351190,9606.ENSP00000364709,9606.ENSP00000364731,9606.ENSP00000385834,9606.ENSP00000415769,9606.ENSP00000416066	SERPIND1,F9,HRG,LRP1,F12,ORM1,VWF,HPX,F2,SERPINF2,A2M,ITIH2,F10,F7,TF,ITIH3,SERPINA1
CL:19457	Extracellular matrix organization	25	180	1	3.97e-14	9606.ENSP00000212355,9606.ENSP00000222399,9606.ENSP00000223061,9606.ENSP00000226218,9606.ENSP00000258341,9606.ENSP00000260356,9606.ENSP00000262407,9606.ENSP00000264187,9606.ENSP00000265131,9606.ENSP00000266718,9606.ENSP00000295550,9606.ENSP00000297848,9606.ENSP00000300527,9606.ENSP00000309953,9606.ENSP00000311905,9606.ENSP00000325146,9606.ENSP00000346478,9606.ENSP00000352798,9606.ENSP00000355180,…	TGFBR3,LAMB1,PCOLCE,VTN,LAMC1,THBS1,ITGA2B,NID1,TNC,LUM,COL6A3,COL14A1,COL6A2,EFEMP2,LTBP4,COL12A1,ADAMTSL2,COL18A1,COL6A1,THBS3,COL5A1,HSPG2,EFEMP1,FBN2,ITGB3
CL:18962	High-density lipoprotein particle	12	21	1.61	3.82e-12	9606.ENSP00000200676,9606.ENSP00000205948,9606.ENSP00000222381,9606.ENSP00000227667,9606.ENSP00000236850,9606.ENSP00000264005,9606.ENSP00000315130,9606.ENSP00000317674,9606.ENSP00000381250,9606.ENSP00000441828,9606.ENSP00000466775,9606.ENSP00000468236	CETP,APOH,PON1,APOC3,APOA1,LCAT,CLU,APOL1,APOF,HPR,APOC2,APOC4
CL:18956	Lipoprotein particle, and Assembly of active LPL and LIPC lipase complexes	14	46	1.34	2.19e-11	9606.ENSP00000200676,9606.ENSP00000205948,9606.ENSP00000222381,9606.ENSP00000227667,9606.ENSP00000236850,9606.ENSP00000264005,9606.ENSP00000315130,9606.ENSP00000317674,9606.ENSP00000360170,9606.ENSP00000381250,9606.ENSP00000392423,9606.ENSP00000441828,9606.ENSP00000466775,9606.ENSP00000468236	CETP,APOH,PON1,APOC3,APOA1,LCAT,CLU,APOL1,ANGPTL3,APOF,RELN,HPR,APOC2,APOC4
CL:18957	Lipoprotein particle	13	36	1.41	2.48e-11	9606.ENSP00000200676,9606.ENSP00000205948,9606.ENSP00000222381,9606.ENSP00000227667,9606.ENSP00000236850,9606.ENSP00000264005,9606.ENSP00000315130,9606.ENSP00000317674,9606.ENSP00000360170,9606.ENSP00000381250,9606.ENSP00000441828,9606.ENSP00000466775,9606.ENSP00000468236	CETP,APOH,PON1,APOC3,APOA1,LCAT,CLU,APOL1,ANGPTL3,APOF,HPR,APOC2,APOC4
CL:19458	Collagen formation, and Protein complex involved in cell adhesion	18	119	1.03	1.68e-10	9606.ENSP00000222399,9606.ENSP00000226218,9606.ENSP00000258341,9606.ENSP00000260356,9606.ENSP00000262407,9606.ENSP00000264187,9606.ENSP00000265131,9606.ENSP00000266718,9606.ENSP00000295550,9606.ENSP00000297848,9606.ENSP00000300527,9606.ENSP00000325146,9606.ENSP00000352798,9606.ENSP00000355180,9606.ENSP00000357362,9606.ENSP00000360882,9606.ENSP00000363827,9606.ENSP00000452786	LAMB1,VTN,LAMC1,THBS1,ITGA2B,NID1,TNC,LUM,COL6A3,COL14A1,COL6A2,COL12A1,COL18A1,COL6A1,THBS3,COL5A1,HSPG2,ITGB3
CL:18732	Mixed, incl. COVID-19, thrombosis and anticoagulation, and Scavenging of heme from plasma	11	26	1.48	4.62e-10	9606.ENSP00000215727,9606.ENSP00000232003,9606.ENSP00000243077,9606.ENSP00000259396,9606.ENSP00000265983,9606.ENSP00000321853,9606.ENSP00000323929,9606.ENSP00000351190,9606.ENSP00000385834,9606.ENSP00000415769,9606.ENSP00000416066	SERPIND1,HRG,LRP1,ORM1,HPX,SERPINF2,A2M,ITIH2,TF,ITIH3,SERPINA1
CL:18849	Initial triggering of complement, and Regulation of complement activation	11	31	1.41	2.06e-09	9606.ENSP00000245907,9606.ENSP00000291744,9606.ENSP00000296280,9606.ENSP00000299367,9606.ENSP00000313967,9606.ENSP00000356399,9606.ENSP00000360871,9606.ENSP00000363770,9606.ENSP00000415941,9606.ENSP00000416561,9606.ENSP00000444271	C3,FCN2,MASP1,C2,C1QB,CFH,FCN1,C1QC,C4B,CFB,C1R
CL:18966	High-density lipoprotein particle	9	16	1.61	6.33e-09	9606.ENSP00000200676,9606.ENSP00000205948,9606.ENSP00000222381,9606.ENSP00000227667,9606.ENSP00000236850,9606.ENSP00000264005,9606.ENSP00000315130,9606.ENSP00000466775,9606.ENSP00000468236	CETP,APOH,PON1,APOC3,APOA1,LCAT,CLU,APOC2,APOC4
CL:18851	Initial triggering of complement, and Negative regulation of complement activation	9	24	1.43	1.03e-07	9606.ENSP00000245907,9606.ENSP00000291744,9606.ENSP00000296280,9606.ENSP00000299367,9606.ENSP00000313967,9606.ENSP00000360871,9606.ENSP00000363770,9606.ENSP00000415941,9606.ENSP00000444271	C3,FCN2,MASP1,C2,C1QB,FCN1,C1QC,C4B,C1R
CL:18970	Triglyceride-rich lipoprotein particle remodeling, and Spherical high-density lipoprotein particle	7	11	1.66	5.29e-07	9606.ENSP00000200676,9606.ENSP00000222381,9606.ENSP00000227667,9606.ENSP00000236850,9606.ENSP00000264005,9606.ENSP00000315130,9606.ENSP00000466775	CETP,PON1,APOC3,APOA1,LCAT,CLU,APOC2
CL:18733	Mixed, incl. COVID-19, thrombosis and anticoagulation, and Inter-alpha-trypsin inhibitor heavy chain C-terminus	8	21	1.44	8.1e-07	9606.ENSP00000215727,9606.ENSP00000232003,9606.ENSP00000259396,9606.ENSP00000321853,9606.ENSP00000351190,9606.ENSP00000385834,9606.ENSP00000415769,9606.ENSP00000416066	SERPIND1,HRG,ORM1,SERPINF2,ITIH2,TF,ITIH3,SERPINA1
CL:18911	Membrane attack complex	6	7	1.79	2.03e-06	9606.ENSP00000223642,9606.ENSP00000263408,9606.ENSP00000322061,9606.ENSP00000354458,9606.ENSP00000360281,9606.ENSP00000360697	C5,C9,C7,C8A,C8B,C8G
CL:18852	Creation of C4 and C2 activators	7	15	1.52	2.37e-06	9606.ENSP00000291744,9606.ENSP00000296280,9606.ENSP00000299367,9606.ENSP00000313967,9606.ENSP00000360871,9606.ENSP00000363770,9606.ENSP00000444271	FCN2,MASP1,C2,C1QB,FCN1,C1QC,C1R
CL:34187	Desmosome, and Ichthyosis vulgaris	8	27	1.33	3.64e-06	9606.ENSP00000252244,9606.ENSP00000257192,9606.ENSP00000269576,9606.ENSP00000310861,9606.ENSP00000342710,9606.ENSP00000369129,9606.ENSP00000372218,9606.ENSP00000373370	KRT1,DSG1,KRT10,KRT2,KRT77,DSP,SERPINB12,FLG2
CL:19468	Collagen chain trimerization	8	32	1.25	1.08e-05	9606.ENSP00000266718,9606.ENSP00000295550,9606.ENSP00000297848,9606.ENSP00000300527,9606.ENSP00000325146,9606.ENSP00000352798,9606.ENSP00000355180,9606.ENSP00000360882	LUM,COL6A3,COL14A1,COL6A2,COL12A1,COL18A1,COL6A1,COL5A1
CL:34189	Mixed, incl. Ichthyosis vulgaris, and Bullous congenital ichthyosiform erythroderma	6	11	1.59	1.19e-05	9606.ENSP00000252244,9606.ENSP00000257192,9606.ENSP00000269576,9606.ENSP00000310861,9606.ENSP00000342710,9606.ENSP00000373370	KRT1,DSG1,KRT10,KRT2,KRT77,FLG2
CL:19587	Protein complex involved in cell adhesion, and Junctional epidermolysis bullosa	9	53	1.09	2.73e-05	9606.ENSP00000222399,9606.ENSP00000226218,9606.ENSP00000258341,9606.ENSP00000260356,9606.ENSP00000262407,9606.ENSP00000264187,9606.ENSP00000265131,9606.ENSP00000363827,9606.ENSP00000452786	LAMB1,VTN,LAMC1,THBS1,ITGA2B,NID1,TNC,HSPG2,ITGB3
CL:34117	Formation of the cornified envelope, and Serpin, conserved site	11	105	0.88	8.92e-05	9606.ENSP00000167586,9606.ENSP00000252242,9606.ENSP00000252244,9606.ENSP00000257192,9606.ENSP00000269576,9606.ENSP00000310861,9606.ENSP00000342710,9606.ENSP00000369129,9606.ENSP00000369317,9606.ENSP00000372218,9606.ENSP00000373370	KRT14,KRT5,KRT1,DSG1,KRT10,KRT2,KRT77,DSP,KRT6A,SERPINB12,FLG2
CL:18784	Formation of Fibrin Clot (Clotting Cascade)	6	18	1.38	0.0001	9606.ENSP00000218099,9606.ENSP00000253496,9606.ENSP00000261405,9606.ENSP00000308541,9606.ENSP00000364709,9606.ENSP00000364731	F9,F12,VWF,F2,F10,F7
CL:19469	Banded collagen fibril, and FACIT collagen trimer	6	18	1.38	0.0001	9606.ENSP00000266718,9606.ENSP00000295550,9606.ENSP00000297848,9606.ENSP00000300527,9606.ENSP00000355180,9606.ENSP00000360882	LUM,COL6A3,COL14A1,COL6A2,COL6A1,COL5A1
CL:17810	Mixed, incl. Actin filament organization, and CDC42 GTPase cycle	14	193	0.72	0.00015	9606.ENSP00000225655,9606.ENSP00000234313,9606.ENSP00000262428,9606.ENSP00000268182,9606.ENSP00000279227,9606.ENSP00000314067,9606.ENSP00000316029,9606.ENSP00000327145,9606.ENSP00000358866,9606.ENSP00000371798,9606.ENSP00000381581,9606.ENSP00000384515,9606.ENSP00000420213,9606.ENSP00000479322	PFN1,PLEK,COTL1,IQGAP1,FERMT3,PAK2,TLN1,FLNC,FLNA,FSCN1,LCP1,PARVB,FLNB,CLIP1
CL:18755	Mixed, incl. Inter-alpha-trypsin inhibitor heavy chain C-terminus, and Alpha-1-acid glycoprotein	5	10	1.55	0.00016	9606.ENSP00000259396,9606.ENSP00000351190,9606.ENSP00000385834,9606.ENSP00000415769,9606.ENSP00000416066	ORM1,ITIH2,TF,ITIH3,SERPINA1
CL:19696	Elastic fibre formation, and Tolloid/BMP1 peptidase domain	7	34	1.17	0.00016	9606.ENSP00000212355,9606.ENSP00000223061,9606.ENSP00000309953,9606.ENSP00000311905,9606.ENSP00000346478,9606.ENSP00000378058,9606.ENSP00000424571	TGFBR3,PCOLCE,EFEMP2,LTBP4,ADAMTSL2,EFEMP1,FBN2
CL:18786	Hemophilia B, and Blood coagulation, common pathway	5	12	1.47	0.0003	9606.ENSP00000218099,9606.ENSP00000261405,9606.ENSP00000308541,9606.ENSP00000364709,9606.ENSP00000364731	F9,VWF,F2,F10,F7
CL:8465	Carbon metabolism, and Pyruvate metabolism	10	100	0.86	0.00033	9606.ENSP00000270776,9606.ENSP00000320171,9606.ENSP00000355518,9606.ENSP00000362413,9606.ENSP00000370517,9606.ENSP00000377192,9606.ENSP00000380070,9606.ENSP00000391481,9606.ENSP00000445175,9606.ENSP00000495530	PGD,PKM,FH,PGK1,PFKP,G6PD,GAPDH,TKT,LDHA,ENO1
CL:9658	Detoxification of Reactive Oxygen Species, and Copper transport	7	40	1.1	0.00036	9606.ENSP00000241052,9606.ENSP00000262746,9606.ENSP00000264613,9606.ENSP00000298510,9606.ENSP00000301522,9606.ENSP00000342026,9606.ENSP00000385757	CAT,PRDX1,CP,PRDX3,PRDX2,PRDX6,BLVRA
CL:18122	Mixed, incl. Cell-extracellular matrix interactions, and Leukocyte adhesion deficiency 3	6	26	1.22	0.00044	9606.ENSP00000279227,9606.ENSP00000316029,9606.ENSP00000327145,9606.ENSP00000358866,9606.ENSP00000384515,9606.ENSP00000420213	FERMT3,TLN1,FLNC,FLNA,PARVB,FLNB
CL:19697	Elastic fibre formation, and Transforming growth factor beta receptor complex assembly	6	27	1.2	0.00051	9606.ENSP00000212355,9606.ENSP00000309953,9606.ENSP00000311905,9606.ENSP00000346478,9606.ENSP00000378058,9606.ENSP00000424571	TGFBR3,EFEMP2,LTBP4,ADAMTSL2,EFEMP1,FBN2
CL:8463	Carbon metabolism, and Pyruvate metabolism	11	134	0.77	0.00052	9606.ENSP00000270776,9606.ENSP00000320171,9606.ENSP00000355518,9606.ENSP00000362413,9606.ENSP00000365773,9606.ENSP00000370517,9606.ENSP00000377192,9606.ENSP00000380070,9606.ENSP00000391481,9606.ENSP00000445175,9606.ENSP00000495530	PGD,PKM,FH,PGK1,PSAT1,PFKP,G6PD,GAPDH,TKT,LDHA,ENO1
CL:8577	Glycolysis, and Pentose-phosphate shunt	7	44	1.06	0.00056	9606.ENSP00000270776,9606.ENSP00000362413,9606.ENSP00000370517,9606.ENSP00000377192,9606.ENSP00000380070,9606.ENSP00000391481,9606.ENSP00000495530	PGD,PGK1,PFKP,G6PD,GAPDH,TKT,ENO1
CL:20087	Mixed, incl. Mucinous adenocarcinoma, and Apical plasma membrane urothelial plaque	6	29	1.17	0.00068	9606.ENSP00000292401,9606.ENSP00000329243,9606.ENSP00000355124,9606.ENSP00000373489,9606.ENSP00000449404,9606.ENSP00000450540	AZGP1,KRT7,KRT19,KRT18,KRT8,SERPINA3
CL:9660	Detoxification of Reactive Oxygen Species, and Heme catabolic process	6	30	1.16	0.00078	9606.ENSP00000241052,9606.ENSP00000262746,9606.ENSP00000298510,9606.ENSP00000301522,9606.ENSP00000342026,9606.ENSP00000385757	CAT,PRDX1,PRDX3,PRDX2,PRDX6,BLVRA
CL:19654	laminin-1 complex, and G2 nidogen domain and fibulin	4	7	1.61	0.00093	9606.ENSP00000222399,9606.ENSP00000258341,9606.ENSP00000264187,9606.ENSP00000363827	LAMB1,LAMC1,NID1,HSPG2
CL:9662	Detoxification of Reactive Oxygen Species, and mRNA, protein, and metabolite inducation pathway by cyclosporin A	5	24	1.17	0.0034	9606.ENSP00000241052,9606.ENSP00000262746,9606.ENSP00000298510,9606.ENSP00000301522,9606.ENSP00000342026	CAT,PRDX1,PRDX3,PRDX2,PRDX6
CL:18125	Filamin family, and Von Willebrand disease	3	5	1.63	0.0103	9606.ENSP00000327145,9606.ENSP00000358866,9606.ENSP00000420213	FLNC,FLNA,FLNB
CL:18774	Scavenging of heme from plasma	3	5	1.63	0.0103	9606.ENSP00000243077,9606.ENSP00000265983,9606.ENSP00000323929	LRP1,HPX,A2M
CL:19588	Integrin domain superfamily, and Cerebral malaria	5	32	1.05	0.0103	9606.ENSP00000226218,9606.ENSP00000260356,9606.ENSP00000262407,9606.ENSP00000265131,9606.ENSP00000452786	VTN,THBS1,ITGA2B,TNC,ITGB3
CL:20088	Mixed, incl. Signet ring cell adenocarcinoma, and Apical plasma membrane urothelial plaque	4	16	1.25	0.0103	9606.ENSP00000329243,9606.ENSP00000355124,9606.ENSP00000373489,9606.ENSP00000449404	KRT7,KRT19,KRT18,KRT8
CL:34253	Pachyonychia congenita, and Epidermolysis bullosa simplex Dowling-Meara type	3	5	1.63	0.0103	9606.ENSP00000167586,9606.ENSP00000252242,9606.ENSP00000369317	KRT14,KRT5,KRT6A
CL:9688	Thioredoxin peroxidase activity	3	5	1.63	0.0103	9606.ENSP00000262746,9606.ENSP00000298510,9606.ENSP00000301522	PRDX1,PRDX3,PRDX2
CL:18123	Cell-extracellular matrix interactions, and Alpha-catenin/vinculin-like superfamily	4	17	1.23	0.0118	9606.ENSP00000327145,9606.ENSP00000358866,9606.ENSP00000384515,9606.ENSP00000420213	FLNC,FLNA,PARVB,FLNB
CL:9664	Glutathione peroxidase, and Thioredoxin peroxidase activity	4	17	1.23	0.0118	9606.ENSP00000262746,9606.ENSP00000298510,9606.ENSP00000301522,9606.ENSP00000342026	PRDX1,PRDX3,PRDX2,PRDX6
CL:18788	Extrinsic Pathway of Fibrin Clot Formation, and Factor V deficiency	3	6	1.55	0.0133	9606.ENSP00000308541,9606.ENSP00000364709,9606.ENSP00000364731	F2,F10,F7
CL:18854	Cell surface pattern recognition receptor signaling pathway	3	6	1.55	0.0133	9606.ENSP00000291744,9606.ENSP00000296280,9606.ENSP00000360871	FCN2,MASP1,FCN1
CL:18869	Complement component C1 complex	3	6	1.55	0.0133	9606.ENSP00000313967,9606.ENSP00000363770,9606.ENSP00000444271	C1QB,C1QC,C1R
CL:34191	Ichthyosis vulgaris, and Epidermolytic acanthoma	3	6	1.55	0.0133	9606.ENSP00000252244,9606.ENSP00000269576,9606.ENSP00000373370	KRT1,KRT10,FLG2
CL:8619	Phosphoglycerate kinase, and Aerobic glycolysis	3	6	1.55	0.0133	9606.ENSP00000362413,9606.ENSP00000380070,9606.ENSP00000495530	PGK1,GAPDH,ENO1
CL:17883	Mixed, incl. Actin-depolymerising factor homology domain, and Sequestering of actin monomers	4	20	1.16	0.0183	9606.ENSP00000225655,9606.ENSP00000262428,9606.ENSP00000371798,9606.ENSP00000381581	PFN1,COTL1,FSCN1,LCP1
CL:9654	Mixed, incl. Glutathione metabolism, and Detoxification of Reactive Oxygen Species	8	115	0.7	0.0185	9606.ENSP00000241052,9606.ENSP00000262746,9606.ENSP00000264613,9606.ENSP00000298510,9606.ENSP00000301522,9606.ENSP00000342026,9606.ENSP00000347872,9606.ENSP00000385757	CAT,PRDX1,CP,PRDX3,PRDX2,PRDX6,VAT1,BLVRA
CL:18734	COVID-19, thrombosis and anticoagulation, and Negative regulation of fibrinolysis	3	11	1.29	0.0468	9606.ENSP00000215727,9606.ENSP00000232003,9606.ENSP00000321853	SERPIND1,HRG,SERPINF2
CL:24971	Mixed, incl. Hemoglobin complex, and Actin filament capping	5	49	0.86	0.0468	9606.ENSP00000251595,9606.ENSP00000262418,9606.ENSP00000349259,9606.ENSP00000487444,9606.ENSP00000494175	HBA2,SLC4A1,SPTBN1,SPTAN1,HBB
CL:8643	Pentose-phosphate shunt	3	11	1.29	0.0468	9606.ENSP00000270776,9606.ENSP00000377192,9606.ENSP00000391481	PGD,G6PD,TKT

## Sheet: GNP
#term ID	term description	observed gene count	background gene count	strength	false discovery rate	matching proteins in your network (IDs)	matching proteins in your network (labels)
CL:18726	Complement and coagulation cascades, and Protein-lipid complex	62	161	1.93	8.57e-99	9606.ENSP00000200676,9606.ENSP00000205948,9606.ENSP00000222381,9606.ENSP00000227667,9606.ENSP00000236850,9606.ENSP00000243611,9606.ENSP00000245907,9606.ENSP00000252486,9606.ENSP00000253496,9606.ENSP00000255040,9606.ENSP00000261405,9606.ENSP00000263408,9606.ENSP00000263413,9606.ENSP00000264690,9606.ENSP00000265132,9606.ENSP00000270879,9606.ENSP00000273784,9606.ENSP00000278407,9606.ENSP00000291744,…	CETP,APOH,PON1,APOC3,APOA1,C4BPB,C3,APOE,F12,APCS,VWF,C9,C6,KLKB1,AMBP,FCN3,AHSG,SERPING1,FCN2,ALB,FGB,F2,PLG,C1QB,CLU,APOL1,CPN2,LPA,SERPINF2,C7,SERPINA5,FGG,HP,APOA4,C4BPA,CFHR4,CFH,F5,APOA2,CPN1,C8B,FCN1,C1QC,C1QA,F10,APOM,APOF,SAA1,F11,C1S,TF,RELN,C4A,CFB,HPR,C1R,APOA5,SERPINA4,APOC1,APOC2,APOC4,FGA
CL:18723	Mixed, incl. Complement and coagulation cascades, and Protein-lipid complex	63	196	1.85	4.09e-97	9606.ENSP00000200676,9606.ENSP00000205948,9606.ENSP00000222381,9606.ENSP00000227667,9606.ENSP00000236850,9606.ENSP00000243611,9606.ENSP00000245907,9606.ENSP00000252486,9606.ENSP00000253496,9606.ENSP00000255040,9606.ENSP00000261405,9606.ENSP00000263408,9606.ENSP00000263413,9606.ENSP00000264690,9606.ENSP00000265132,9606.ENSP00000270879,9606.ENSP00000273784,9606.ENSP00000278407,9606.ENSP00000291744,…	CETP,APOH,PON1,APOC3,APOA1,C4BPB,C3,APOE,F12,APCS,VWF,C9,C6,KLKB1,AMBP,FCN3,AHSG,SERPING1,FCN2,ALB,FGB,F2,PLG,C1QB,CLU,APOL1,CPN2,LPA,SERPINF2,C7,SERPINA5,FGG,HP,APOA4,C4BPA,CFHR4,CFH,F5,APOA2,CPN1,C8B,FCN1,C1QC,C1QA,F10,APOM,PROS1,APOF,SAA1,F11,C1S,TF,RELN,C4A,CFB,HPR,C1R,APOA5,SERPINA4,APOC1,APOC2,APOC4,FGA
CL:18727	Complement and coagulation cascades, and Positive regulation of opsonization	42	115	1.9	8.81e-63	9606.ENSP00000243611,9606.ENSP00000245907,9606.ENSP00000253496,9606.ENSP00000255040,9606.ENSP00000261405,9606.ENSP00000263408,9606.ENSP00000263413,9606.ENSP00000264690,9606.ENSP00000265132,9606.ENSP00000270879,9606.ENSP00000273784,9606.ENSP00000278407,9606.ENSP00000291744,9606.ENSP00000295897,9606.ENSP00000306099,9606.ENSP00000308541,9606.ENSP00000308938,9606.ENSP00000313967,9606.ENSP00000319464,…	C4BPB,C3,F12,APCS,VWF,C9,C6,KLKB1,AMBP,FCN3,AHSG,SERPING1,FCN2,ALB,FGB,F2,PLG,C1QB,CPN2,SERPINF2,C7,SERPINA5,FGG,HP,C4BPA,CFHR4,CFH,F5,CPN1,C8B,FCN1,C1QC,C1QA,F10,F11,C1S,TF,C4A,CFB,C1R,SERPINA4,FGA
CL:18728	Complement and coagulation cascades, and Positive regulation of opsonization	40	109	1.9	1.33e-59	9606.ENSP00000243611,9606.ENSP00000245907,9606.ENSP00000253496,9606.ENSP00000255040,9606.ENSP00000261405,9606.ENSP00000263408,9606.ENSP00000263413,9606.ENSP00000264690,9606.ENSP00000265132,9606.ENSP00000270879,9606.ENSP00000273784,9606.ENSP00000278407,9606.ENSP00000291744,9606.ENSP00000295897,9606.ENSP00000306099,9606.ENSP00000308541,9606.ENSP00000308938,9606.ENSP00000313967,9606.ENSP00000321853,…	C4BPB,C3,F12,APCS,VWF,C9,C6,KLKB1,AMBP,FCN3,AHSG,SERPING1,FCN2,ALB,FGB,F2,PLG,C1QB,SERPINF2,C7,SERPINA5,FGG,HP,C4BPA,CFHR4,CFH,F5,C8B,FCN1,C1QC,C1QA,F10,F11,C1S,TF,C4A,CFB,C1R,SERPINA4,FGA
CL:18846	Complement cascade	21	50	1.96	1.58e-30	9606.ENSP00000243611,9606.ENSP00000245907,9606.ENSP00000255040,9606.ENSP00000263408,9606.ENSP00000263413,9606.ENSP00000270879,9606.ENSP00000278407,9606.ENSP00000291744,9606.ENSP00000313967,9606.ENSP00000322061,9606.ENSP00000356037,9606.ENSP00000356386,9606.ENSP00000356399,9606.ENSP00000360281,9606.ENSP00000360871,9606.ENSP00000363770,9606.ENSP00000363773,9606.ENSP00000385035,9606.ENSP00000396688,…	C4BPB,C3,APCS,C9,C6,FCN3,SERPING1,FCN2,C1QB,C7,C4BPA,CFHR4,CFH,C8B,FCN1,C1QC,C1QA,C1S,C4A,CFB,C1R
CL:18956	Lipoprotein particle, and Assembly of active LPL and LIPC lipase complexes	20	46	1.98	2.94e-29	9606.ENSP00000200676,9606.ENSP00000205948,9606.ENSP00000222381,9606.ENSP00000227667,9606.ENSP00000236850,9606.ENSP00000252486,9606.ENSP00000315130,9606.ENSP00000317674,9606.ENSP00000321334,9606.ENSP00000350425,9606.ENSP00000356969,9606.ENSP00000365081,9606.ENSP00000381250,9606.ENSP00000384906,9606.ENSP00000392423,9606.ENSP00000441828,9606.ENSP00000445002,9606.ENSP00000465356,9606.ENSP00000466775,…	CETP,APOH,PON1,APOC3,APOA1,APOE,CLU,APOL1,LPA,APOA4,APOA2,APOM,APOF,SAA1,RELN,HPR,APOA5,APOC1,APOC2,APOC4
CL:18960	High-density lipoprotein particle	18	26	2.18	5.4e-29	9606.ENSP00000200676,9606.ENSP00000205948,9606.ENSP00000222381,9606.ENSP00000227667,9606.ENSP00000236850,9606.ENSP00000315130,9606.ENSP00000317674,9606.ENSP00000321334,9606.ENSP00000350425,9606.ENSP00000356969,9606.ENSP00000365081,9606.ENSP00000381250,9606.ENSP00000384906,9606.ENSP00000441828,9606.ENSP00000445002,9606.ENSP00000465356,9606.ENSP00000466775,9606.ENSP00000468236	CETP,APOH,PON1,APOC3,APOA1,CLU,APOL1,LPA,APOA4,APOA2,APOM,APOF,SAA1,HPR,APOA5,APOC1,APOC2,APOC4
CL:18848	Complement cascade	19	40	2.02	2.29e-28	9606.ENSP00000243611,9606.ENSP00000245907,9606.ENSP00000263408,9606.ENSP00000263413,9606.ENSP00000270879,9606.ENSP00000278407,9606.ENSP00000291744,9606.ENSP00000313967,9606.ENSP00000322061,9606.ENSP00000356037,9606.ENSP00000356399,9606.ENSP00000360281,9606.ENSP00000360871,9606.ENSP00000363770,9606.ENSP00000363773,9606.ENSP00000385035,9606.ENSP00000396688,9606.ENSP00000416561,9606.ENSP00000444271	C4BPB,C3,C9,C6,FCN3,SERPING1,FCN2,C1QB,C7,C4BPA,CFH,C8B,FCN1,C1QC,C1QA,C1S,C4A,CFB,C1R
CL:18962	High-density lipoprotein particle	17	21	2.25	3.4e-28	9606.ENSP00000200676,9606.ENSP00000205948,9606.ENSP00000222381,9606.ENSP00000227667,9606.ENSP00000236850,9606.ENSP00000315130,9606.ENSP00000317674,9606.ENSP00000321334,9606.ENSP00000350425,9606.ENSP00000356969,9606.ENSP00000365081,9606.ENSP00000381250,9606.ENSP00000441828,9606.ENSP00000445002,9606.ENSP00000465356,9606.ENSP00000466775,9606.ENSP00000468236	CETP,APOH,PON1,APOC3,APOA1,CLU,APOL1,LPA,APOA4,APOA2,APOM,APOF,HPR,APOA5,APOC1,APOC2,APOC4
CL:18730	Hemostasis, and Dissolution of Fibrin Clot	19	55	1.88	2.57e-26	9606.ENSP00000253496,9606.ENSP00000261405,9606.ENSP00000264690,9606.ENSP00000265132,9606.ENSP00000273784,9606.ENSP00000295897,9606.ENSP00000306099,9606.ENSP00000308541,9606.ENSP00000308938,9606.ENSP00000321853,9606.ENSP00000333203,9606.ENSP00000336829,9606.ENSP00000348170,9606.ENSP00000356771,9606.ENSP00000364709,9606.ENSP00000384957,9606.ENSP00000385834,9606.ENSP00000451172,9606.ENSP00000498441	F12,VWF,KLKB1,AMBP,AHSG,ALB,FGB,F2,PLG,SERPINF2,SERPINA5,FGG,HP,F5,F10,F11,TF,SERPINA4,FGA
CL:18966	High-density lipoprotein particle	14	16	2.28	2.51e-23	9606.ENSP00000200676,9606.ENSP00000205948,9606.ENSP00000222381,9606.ENSP00000227667,9606.ENSP00000236850,9606.ENSP00000315130,9606.ENSP00000321334,9606.ENSP00000350425,9606.ENSP00000356969,9606.ENSP00000365081,9606.ENSP00000445002,9606.ENSP00000465356,9606.ENSP00000466775,9606.ENSP00000468236	CETP,APOH,PON1,APOC3,APOA1,CLU,LPA,APOA4,APOA2,APOM,APOA5,APOC1,APOC2,APOC4
CL:18731	Hemostasis, and Dissolution of Fibrin Clot	17	50	1.87	2.64e-23	9606.ENSP00000253496,9606.ENSP00000261405,9606.ENSP00000264690,9606.ENSP00000265132,9606.ENSP00000273784,9606.ENSP00000295897,9606.ENSP00000306099,9606.ENSP00000308541,9606.ENSP00000308938,9606.ENSP00000321853,9606.ENSP00000336829,9606.ENSP00000348170,9606.ENSP00000356771,9606.ENSP00000364709,9606.ENSP00000384957,9606.ENSP00000385834,9606.ENSP00000498441	F12,VWF,KLKB1,AMBP,AHSG,ALB,FGB,F2,PLG,SERPINF2,FGG,HP,F5,F10,F11,TF,FGA
CL:18849	Initial triggering of complement, and Regulation of complement activation	13	31	1.96	1.91e-18	9606.ENSP00000245907,9606.ENSP00000270879,9606.ENSP00000278407,9606.ENSP00000291744,9606.ENSP00000313967,9606.ENSP00000356399,9606.ENSP00000360871,9606.ENSP00000363770,9606.ENSP00000363773,9606.ENSP00000385035,9606.ENSP00000396688,9606.ENSP00000416561,9606.ENSP00000444271	C3,FCN3,SERPING1,FCN2,C1QB,CFH,FCN1,C1QC,C1QA,C1S,C4A,CFB,C1R
CL:18970	Triglyceride-rich lipoprotein particle remodeling, and Spherical high-density lipoprotein particle	10	11	2.3	2.06e-16	9606.ENSP00000200676,9606.ENSP00000222381,9606.ENSP00000227667,9606.ENSP00000236850,9606.ENSP00000315130,9606.ENSP00000350425,9606.ENSP00000356969,9606.ENSP00000445002,9606.ENSP00000465356,9606.ENSP00000466775	CETP,PON1,APOC3,APOA1,CLU,APOA4,APOA2,APOA5,APOC1,APOC2
CL:18851	Initial triggering of complement, and Negative regulation of complement activation	11	24	2	8.87e-16	9606.ENSP00000245907,9606.ENSP00000270879,9606.ENSP00000278407,9606.ENSP00000291744,9606.ENSP00000313967,9606.ENSP00000360871,9606.ENSP00000363770,9606.ENSP00000363773,9606.ENSP00000385035,9606.ENSP00000396688,9606.ENSP00000444271	C3,FCN3,SERPING1,FCN2,C1QB,FCN1,C1QC,C1QA,C1S,C4A,C1R
CL:18732	Mixed, incl. COVID-19, thrombosis and anticoagulation, and Scavenging of heme from plasma	10	26	1.93	1.26e-13	9606.ENSP00000265132,9606.ENSP00000273784,9606.ENSP00000295897,9606.ENSP00000306099,9606.ENSP00000308938,9606.ENSP00000321853,9606.ENSP00000336829,9606.ENSP00000348170,9606.ENSP00000385834,9606.ENSP00000498441	AMBP,AHSG,ALB,FGB,PLG,SERPINF2,FGG,HP,TF,FGA
CL:18852	Creation of C4 and C2 activators	9	15	2.12	1.56e-13	9606.ENSP00000270879,9606.ENSP00000278407,9606.ENSP00000291744,9606.ENSP00000313967,9606.ENSP00000360871,9606.ENSP00000363770,9606.ENSP00000363773,9606.ENSP00000385035,9606.ENSP00000444271	FCN3,SERPING1,FCN2,C1QB,FCN1,C1QC,C1QA,C1S,C1R
CL:18733	Mixed, incl. COVID-19, thrombosis and anticoagulation, and Inter-alpha-trypsin inhibitor heavy chain C-terminus	9	21	1.97	1.59e-12	9606.ENSP00000265132,9606.ENSP00000273784,9606.ENSP00000295897,9606.ENSP00000306099,9606.ENSP00000308938,9606.ENSP00000321853,9606.ENSP00000336829,9606.ENSP00000385834,9606.ENSP00000498441	AMBP,AHSG,ALB,FGB,PLG,SERPINF2,FGG,TF,FGA
CL:18869	Complement component C1 complex	6	6	2.34	1.4e-09	9606.ENSP00000278407,9606.ENSP00000313967,9606.ENSP00000363770,9606.ENSP00000363773,9606.ENSP00000385035,9606.ENSP00000444271	SERPING1,C1QB,C1QC,C1QA,C1S,C1R
CL:18784	Formation of Fibrin Clot (Clotting Cascade)	7	18	1.93	2.84e-09	9606.ENSP00000253496,9606.ENSP00000261405,9606.ENSP00000264690,9606.ENSP00000308541,9606.ENSP00000356771,9606.ENSP00000364709,9606.ENSP00000384957	F12,VWF,KLKB1,F2,F5,F10,F11
CL:18973	Regulation of very-low-density lipoprotein particle clearance, and Negative regulation of cholesterol import	5	5	2.34	7.88e-08	9606.ENSP00000227667,9606.ENSP00000350425,9606.ENSP00000356969,9606.ENSP00000465356,9606.ENSP00000466775	APOC3,APOA4,APOA2,APOC1,APOC2
CL:18734	COVID-19, thrombosis and anticoagulation, and Negative regulation of fibrinolysis	5	11	2	1.28e-06	9606.ENSP00000306099,9606.ENSP00000308938,9606.ENSP00000321853,9606.ENSP00000336829,9606.ENSP00000498441	FGB,PLG,SERPINF2,FGG,FGA
CL:18786	Hemophilia B, and Blood coagulation, common pathway	5	12	1.96	1.75e-06	9606.ENSP00000261405,9606.ENSP00000308541,9606.ENSP00000356771,9606.ENSP00000364709,9606.ENSP00000384957	VWF,F2,F5,F10,F11
CL:18737	Fibrinogen, and Thrombophilia	4	6	2.16	1.34e-05	9606.ENSP00000306099,9606.ENSP00000308938,9606.ENSP00000336829,9606.ENSP00000498441	FGB,PLG,FGG,FGA
CL:18911	Membrane attack complex	4	7	2.1	2.03e-05	9606.ENSP00000263408,9606.ENSP00000263413,9606.ENSP00000322061,9606.ENSP00000360281	C9,C6,C7,C8B
CL:18755	Mixed, incl. Inter-alpha-trypsin inhibitor heavy chain C-terminus, and Alpha-1-acid glycoprotein	4	10	1.94	5.9e-05	9606.ENSP00000265132,9606.ENSP00000273784,9606.ENSP00000295897,9606.ENSP00000385834	AMBP,AHSG,ALB,TF
CL:18788	Extrinsic Pathway of Fibrin Clot Formation, and Factor V deficiency	3	6	2.04	0.0011	9606.ENSP00000308541,9606.ENSP00000356771,9606.ENSP00000364709	F2,F5,F10
CL:18854	Cell surface pattern recognition receptor signaling pathway	3	6	2.04	0.0011	9606.ENSP00000270879,9606.ENSP00000291744,9606.ENSP00000360871	FCN3,FCN2,FCN1
CL:17209	Immunoglobulin complex, and DNA recombinase complex	3	27	1.39	0.0468	9606.ENSP00000348888,9606.ENSP00000440066,9606.ENSP00000478893	PIGR,JCHAIN,IGHD
