# Supplementary material for: Sources of biases in the in vitro testing of nanomaterials: the role of the biomolecular corona
Source: Royal Society of Chemistry journal article supplement (doi:10.1039/d3nh00510k), 2024-01-01
Supplement: d3nh00510k9.xlsx [file d3nh00510k9.xlsx]

## Sheet: GO
#category	term ID	term description	observed gene count	background gene count	strength	false discovery rate	matching proteins in your network (IDs)	matching proteins in your network (labels)
GO Component	GO:0005576	Extracellular region	224	4175	0.59	2.27e-96	9606.ENSP00000167586,9606.ENSP00000200676,9606.ENSP00000205948,9606.ENSP00000207549,9606.ENSP00000212355,9606.ENSP00000215727,9606.ENSP00000217133,9606.ENSP00000217407,9606.ENSP00000218099,9606.ENSP00000222271,9606.ENSP00000222381,9606.ENSP00000222399,9606.ENSP00000223061,9606.ENSP00000223357,9606.ENSP00000223642,9606.ENSP00000225655,9606.ENSP00000226218,9606.ENSP00000226355,9606.ENSP00000227667,…	KRT14,CETP,APOH,UNC13D,TGFBR3,SERPIND1,TUBB1,LBP,F9,COMP,PON1,LAMB1,PCOLCE,AEBP1,C5,PFN1,VTN,AFM,APOC3,GPLD1,HRG,APOB,APOA1,CAT,PEPD,C3,KRT13,CANX,KRT5,KRT1,PLVAP,PXDN,BPIFB1,F12,MATN2,APCS,NOTCH2,LAMC1,ORM1,THBS1,VWF,AARS1,ITGA2B,SLC4A1,PRDX1,LGALS3BP,A1BG,NOTCH3,C9,NID1,CP,TNC,PRDX5,HPX,LUM,IQGAP1,CDH11,KRT10,PGD,S100A11,ITIH1,ALDH1L1,HABP2,FERMT3,APP,STOM,APPL1,KPNB1,FCN2,AZGP1,PKDCC,COL6A3,CA…
GO Component	GO:0070062	Extracellular exosome	173	2096	0.77	5.85e-92	9606.ENSP00000167586,9606.ENSP00000200676,9606.ENSP00000205948,9606.ENSP00000212355,9606.ENSP00000215727,9606.ENSP00000217133,9606.ENSP00000217407,9606.ENSP00000218099,9606.ENSP00000222271,9606.ENSP00000222381,9606.ENSP00000222399,9606.ENSP00000223061,9606.ENSP00000223357,9606.ENSP00000223642,9606.ENSP00000225655,9606.ENSP00000226218,9606.ENSP00000226355,9606.ENSP00000227667,9606.ENSP00000230036,…	KRT14,CETP,APOH,TGFBR3,SERPIND1,TUBB1,LBP,F9,COMP,PON1,LAMB1,PCOLCE,AEBP1,C5,PFN1,VTN,AFM,APOC3,GPLD1,HRG,APOB,APOA1,CAT,PEPD,C3,KRT13,CANX,KRT5,KRT1,PLVAP,PXDN,BPIFB1,F12,APCS,LAMC1,ORM1,THBS1,VWF,AARS1,ITGA2B,SLC4A1,PRDX1,LGALS3BP,A1BG,C9,NID1,CP,PRDX5,HPX,LUM,IQGAP1,CDH11,KRT10,PGD,S100A11,ITIH1,ALDH1L1,FERMT3,APP,STOM,APPL1,KPNB1,FCN2,AZGP1,COL6A3,CAMP,C2,COL6A2,GLOD4,PRDX2,LRG1,HSPA4,TWF2,F2…
GO Component	GO:1903561	Extracellular vesicle	174	2120	0.77	5.85e-92	9606.ENSP00000167586,9606.ENSP00000200676,9606.ENSP00000205948,9606.ENSP00000212355,9606.ENSP00000215727,9606.ENSP00000217133,9606.ENSP00000217407,9606.ENSP00000218099,9606.ENSP00000222271,9606.ENSP00000222381,9606.ENSP00000222399,9606.ENSP00000223061,9606.ENSP00000223357,9606.ENSP00000223642,9606.ENSP00000225655,9606.ENSP00000226218,9606.ENSP00000226355,9606.ENSP00000227667,9606.ENSP00000230036,…	KRT14,CETP,APOH,TGFBR3,SERPIND1,TUBB1,LBP,F9,COMP,PON1,LAMB1,PCOLCE,AEBP1,C5,PFN1,VTN,AFM,APOC3,GPLD1,HRG,APOB,APOA1,CAT,PEPD,C3,KRT13,CANX,KRT5,KRT1,PLVAP,PXDN,BPIFB1,F12,APCS,LAMC1,ORM1,THBS1,VWF,AARS1,ITGA2B,SLC4A1,PRDX1,LGALS3BP,A1BG,C9,NID1,CP,PRDX5,HPX,LUM,IQGAP1,CDH11,KRT10,PGD,S100A11,ITIH1,ALDH1L1,FERMT3,APP,STOM,APPL1,KPNB1,FCN2,AZGP1,COL6A3,CAMP,C2,COL6A2,GLOD4,PRDX2,LRG1,HSPA4,TWF2,F2…
GO Component	GO:0005615	Extracellular space	198	3247	0.64	2.64e-88	9606.ENSP00000167586,9606.ENSP00000200676,9606.ENSP00000205948,9606.ENSP00000212355,9606.ENSP00000215727,9606.ENSP00000217133,9606.ENSP00000217407,9606.ENSP00000218099,9606.ENSP00000222271,9606.ENSP00000222381,9606.ENSP00000222399,9606.ENSP00000223061,9606.ENSP00000223357,9606.ENSP00000223642,9606.ENSP00000225655,9606.ENSP00000226218,9606.ENSP00000226355,9606.ENSP00000227667,9606.ENSP00000230036,…	KRT14,CETP,APOH,TGFBR3,SERPIND1,TUBB1,LBP,F9,COMP,PON1,LAMB1,PCOLCE,AEBP1,C5,PFN1,VTN,AFM,APOC3,GPLD1,HRG,APOB,APOA1,CAT,PEPD,C3,KRT13,CANX,KRT5,KRT1,PLVAP,PXDN,BPIFB1,F12,APCS,LAMC1,ORM1,THBS1,VWF,AARS1,ITGA2B,SLC4A1,PRDX1,LGALS3BP,A1BG,C9,NID1,CP,TNC,PRDX5,HPX,LUM,IQGAP1,CDH11,KRT10,PGD,S100A11,ITIH1,ALDH1L1,HABP2,FERMT3,APP,STOM,APPL1,KPNB1,FCN2,AZGP1,COL6A3,CAMP,COL14A1,C2,COL6A2,GLOD4,PRDX2,…
GO Component	GO:0031982	Vesicle	200	3957	0.56	2.84e-75	9606.ENSP00000167586,9606.ENSP00000200676,9606.ENSP00000205948,9606.ENSP00000207549,9606.ENSP00000212355,9606.ENSP00000215727,9606.ENSP00000217133,9606.ENSP00000217407,9606.ENSP00000218099,9606.ENSP00000222271,9606.ENSP00000222381,9606.ENSP00000222399,9606.ENSP00000223061,9606.ENSP00000223357,9606.ENSP00000223642,9606.ENSP00000225655,9606.ENSP00000226218,9606.ENSP00000226355,9606.ENSP00000227667,…	KRT14,CETP,APOH,UNC13D,TGFBR3,SERPIND1,TUBB1,LBP,F9,COMP,PON1,LAMB1,PCOLCE,AEBP1,C5,PFN1,VTN,AFM,APOC3,GPLD1,HRG,APOB,APOA1,CAT,PEPD,C3,KRT13,CANX,KRT5,KRT1,PLVAP,PXDN,BPIFB1,F12,APCS,DSG1,LAMC1,ORM1,THBS1,VWF,AARS1,ITGA2B,SLC4A1,PRDX1,LGALS3BP,MAPK3,A1BG,C9,NID1,CP,PRDX5,HPX,LUM,IQGAP1,CDH11,KRT10,PGD,S100A11,ITIH1,ALDH1L1,FERMT3,APP,STOM,APPL1,KPNB1,FCN2,AZGP1,COL6A3,CAMP,PRDX3,C2,COL6A2,GLOD4,…
GO Component	GO:0031012	Extracellular matrix	71	552	0.97	1.27e-42	9606.ENSP00000205948,9606.ENSP00000212355,9606.ENSP00000218099,9606.ENSP00000222271,9606.ENSP00000222399,9606.ENSP00000223357,9606.ENSP00000226218,9606.ENSP00000227667,9606.ENSP00000230036,9606.ENSP00000232003,9606.ENSP00000236850,9606.ENSP00000252244,9606.ENSP00000252804,9606.ENSP00000253496,9606.ENSP00000254898,9606.ENSP00000255040,9606.ENSP00000258341,9606.ENSP00000259396,9606.ENSP00000260356,…	APOH,TGFBR3,F9,COMP,LAMB1,AEBP1,VTN,APOC3,GPLD1,HRG,APOA1,KRT1,PXDN,F12,MATN2,APCS,LAMC1,ORM1,THBS1,VWF,LGALS3BP,A1BG,NID1,TNC,HPX,LUM,ITIH1,FCN2,AZGP1,COL6A3,COL14A1,COL6A2,F2,SNED1,EFEMP2,LTBP4,C1QB,CLU,CPN2,CALR,SPOCK2,A2M,COL12A1,ANG,ADAMTSL2,ITIH2,COL18A1,COL6A1,AGT,THBS3,ADAMTSL4,FCN1,COL5A1,MATN4,MATN1,C1QC,HSPG2,ANXA1,POSTN,SERPINB12,SSC5D,EFEMP1,CXCL12,MATN3,RELN,TNXB,SERPINA1,IGFALS,FBN…
GO Component	GO:0062023	Collagen-containing extracellular matrix	63	407	1.05	8.41e-42	9606.ENSP00000205948,9606.ENSP00000218099,9606.ENSP00000222271,9606.ENSP00000222399,9606.ENSP00000223357,9606.ENSP00000226218,9606.ENSP00000227667,9606.ENSP00000232003,9606.ENSP00000236850,9606.ENSP00000252244,9606.ENSP00000252804,9606.ENSP00000253496,9606.ENSP00000254898,9606.ENSP00000255040,9606.ENSP00000258341,9606.ENSP00000259396,9606.ENSP00000260356,9606.ENSP00000261405,9606.ENSP00000262776,…	APOH,F9,COMP,LAMB1,AEBP1,VTN,APOC3,HRG,APOA1,KRT1,PXDN,F12,MATN2,APCS,LAMC1,ORM1,THBS1,VWF,LGALS3BP,A1BG,NID1,TNC,HPX,LUM,ITIH1,FCN2,AZGP1,COL6A3,COL14A1,COL6A2,F2,EFEMP2,LTBP4,C1QB,CLU,CALR,A2M,COL12A1,ANG,ITIH2,COL18A1,COL6A1,AGT,THBS3,ADAMTSL4,FCN1,COL5A1,MATN4,MATN1,C1QC,HSPG2,ANXA1,POSTN,SERPINB12,SSC5D,EFEMP1,CXCL12,MATN3,TNXB,SERPINA1,FBN2,SERPINA3,KNG1
GO Component	GO:0072562	Blood microparticle	43	118	1.42	3.35e-41	9606.ENSP00000222381,9606.ENSP00000225655,9606.ENSP00000226218,9606.ENSP00000226355,9606.ENSP00000232003,9606.ENSP00000236850,9606.ENSP00000245907,9606.ENSP00000252244,9606.ENSP00000255040,9606.ENSP00000259396,9606.ENSP00000262407,9606.ENSP00000262418,9606.ENSP00000262776,9606.ENSP00000263100,9606.ENSP00000263408,9606.ENSP00000264613,9606.ENSP00000265983,9606.ENSP00000273283,9606.ENSP00000286713,…	PON1,PFN1,VTN,AFM,HRG,APOA1,C3,KRT1,APCS,ORM1,ITGA2B,SLC4A1,LGALS3BP,A1BG,C9,CP,HPX,ITIH1,STOM,FCN2,F2,C1QB,CLU,APOL1,CPN2,A2M,ITIH2,C8A,AGT,CFH,C8G,C1QC,PROS1,TF,C4B,CFB,GC,HPR,C1R,SERPINA3,IGHD,KNG1,HBB
GO Component	GO:0071944	Cell periphery	166	6015	0.3	4e-22	9606.ENSP00000012443,9606.ENSP00000205948,9606.ENSP00000212355,9606.ENSP00000218099,9606.ENSP00000222271,9606.ENSP00000222399,9606.ENSP00000223357,9606.ENSP00000223642,9606.ENSP00000225655,9606.ENSP00000226218,9606.ENSP00000227667,9606.ENSP00000230036,9606.ENSP00000232003,9606.ENSP00000233242,9606.ENSP00000236850,9606.ENSP00000241052,9606.ENSP00000245907,9606.ENSP00000247461,9606.ENSP00000252244,…	PPP5C,APOH,TGFBR3,F9,COMP,LAMB1,AEBP1,C5,PFN1,VTN,APOC3,GPLD1,HRG,APOB,APOA1,CAT,C3,CANX,KRT1,PLVAP,PXDN,F12,MATN2,APCS,NOTCH2,DSG1,LAMC1,ORM1,THBS1,VWF,ITGA2B,SLC4A1,LGALS3BP,MAPK3,A1BG,NOTCH3,C9,CLASP1,NID1,CP,TNC,HPX,LUM,IQGAP1,CDH11,KRT10,ITIH1,MYL9,APP,STOM,APPL1,FCN2,AZGP1,COL6A3,COL14A1,C2,COL6A2,MAP2K1,NPTX1,F2,SNED1,EFEMP2,KRT2,LTBP4,STAB1,GNAI2,C1QB,PAK2,CLU,TLN1,BIN1,NCL,CPN2,IGDCC4,CA…
GO Component	GO:0005788	Endoplasmic reticulum lumen	35	312	0.91	3.62e-18	9606.ENSP00000215727,9606.ENSP00000218099,9606.ENSP00000222399,9606.ENSP00000226218,9606.ENSP00000233242,9606.ENSP00000236850,9606.ENSP00000245907,9606.ENSP00000247461,9606.ENSP00000258341,9606.ENSP00000260356,9606.ENSP00000263025,9606.ENSP00000264613,9606.ENSP00000265131,9606.ENSP00000284981,9606.ENSP00000295550,9606.ENSP00000297848,9606.ENSP00000300527,9606.ENSP00000308541,9606.ENSP00000315130,…	SERPIND1,F9,LAMB1,VTN,APOB,APOA1,C3,CANX,LAMC1,THBS1,MAPK3,CP,TNC,APP,COL6A3,COL14A1,COL6A2,F2,CLU,APOL1,CALR,COL12A1,GANAB,ITIH2,COL18A1,COL6A1,ADAMTSL4,COL5A1,MINPP1,F10,MATN3,PDIA6,TF,SERPINA1,KNG1
GO Component	GO:0032994	Protein-lipid complex	16	41	1.45	5.19e-15	9606.ENSP00000200676,9606.ENSP00000205948,9606.ENSP00000222381,9606.ENSP00000227667,9606.ENSP00000233242,9606.ENSP00000236850,9606.ENSP00000284981,9606.ENSP00000315130,9606.ENSP00000316779,9606.ENSP00000317674,9606.ENSP00000381250,9606.ENSP00000387654,9606.ENSP00000417138,9606.ENSP00000441828,9606.ENSP00000466775,9606.ENSP00000468236	CETP,APOH,PON1,APOC3,APOB,APOA1,APP,CLU,BIN1,APOL1,APOF,PCYOX1,PLTP,HPR,APOC2,APOC4
GO Component	GO:0031983	Vesicle lumen	32	326	0.85	5.24e-15	9606.ENSP00000205948,9606.ENSP00000207549,9606.ENSP00000232003,9606.ENSP00000233242,9606.ENSP00000236850,9606.ENSP00000241052,9606.ENSP00000245907,9606.ENSP00000259396,9606.ENSP00000260356,9606.ENSP00000261405,9606.ENSP00000262776,9606.ENSP00000263100,9606.ENSP00000271638,9606.ENSP00000279227,9606.ENSP00000284981,9606.ENSP00000290158,9606.ENSP00000296435,9606.ENSP00000302621,9606.ENSP00000309474,…	APOH,UNC13D,HRG,APOB,APOA1,CAT,C3,ORM1,THBS1,VWF,LGALS3BP,A1BG,S100A11,FERMT3,APP,KPNB1,CAMP,LRG1,PSMD1,CLU,A2M,DYNC1H1,FCN1,XRCC5,PROS1,TF,PSMD14,SERPINA1,SERPINA3,PSMC3,SPTAN1,KNG1
GO Component	GO:0034774	Secretory granule lumen	31	321	0.84	2.4e-14	9606.ENSP00000205948,9606.ENSP00000207549,9606.ENSP00000232003,9606.ENSP00000236850,9606.ENSP00000241052,9606.ENSP00000245907,9606.ENSP00000259396,9606.ENSP00000260356,9606.ENSP00000261405,9606.ENSP00000262776,9606.ENSP00000263100,9606.ENSP00000271638,9606.ENSP00000279227,9606.ENSP00000284981,9606.ENSP00000290158,9606.ENSP00000296435,9606.ENSP00000302621,9606.ENSP00000309474,9606.ENSP00000315130,…	APOH,UNC13D,HRG,APOA1,CAT,C3,ORM1,THBS1,VWF,LGALS3BP,A1BG,S100A11,FERMT3,APP,KPNB1,CAMP,LRG1,PSMD1,CLU,A2M,DYNC1H1,FCN1,XRCC5,PROS1,TF,PSMD14,SERPINA1,SERPINA3,PSMC3,SPTAN1,KNG1
GO Component	GO:0034364	High-density lipoprotein particle	14	29	1.54	3.48e-14	9606.ENSP00000200676,9606.ENSP00000205948,9606.ENSP00000222381,9606.ENSP00000227667,9606.ENSP00000233242,9606.ENSP00000236850,9606.ENSP00000284981,9606.ENSP00000315130,9606.ENSP00000317674,9606.ENSP00000381250,9606.ENSP00000417138,9606.ENSP00000441828,9606.ENSP00000466775,9606.ENSP00000468236	CETP,APOH,PON1,APOC3,APOB,APOA1,APP,CLU,APOL1,APOF,PLTP,HPR,APOC2,APOC4
GO Component	GO:0034358	Plasma lipoprotein particle	15	38	1.45	3.48e-14	9606.ENSP00000200676,9606.ENSP00000205948,9606.ENSP00000222381,9606.ENSP00000227667,9606.ENSP00000233242,9606.ENSP00000236850,9606.ENSP00000284981,9606.ENSP00000315130,9606.ENSP00000317674,9606.ENSP00000381250,9606.ENSP00000387654,9606.ENSP00000417138,9606.ENSP00000441828,9606.ENSP00000466775,9606.ENSP00000468236	CETP,APOH,PON1,APOC3,APOB,APOA1,APP,CLU,APOL1,APOF,PCYOX1,PLTP,HPR,APOC2,APOC4
GO Component	GO:0030141	Secretory granule	48	873	0.6	1.08e-13	9606.ENSP00000205948,9606.ENSP00000207549,9606.ENSP00000232003,9606.ENSP00000236850,9606.ENSP00000241052,9606.ENSP00000245907,9606.ENSP00000252244,9606.ENSP00000257192,9606.ENSP00000259396,9606.ENSP00000260356,9606.ENSP00000261405,9606.ENSP00000262407,9606.ENSP00000262776,9606.ENSP00000263100,9606.ENSP00000268182,9606.ENSP00000271638,9606.ENSP00000279227,9606.ENSP00000284981,9606.ENSP00000286713,…	APOH,UNC13D,HRG,APOA1,CAT,C3,KRT1,DSG1,ORM1,THBS1,VWF,ITGA2B,LGALS3BP,A1BG,IQGAP1,S100A11,FERMT3,APP,STOM,KPNB1,CAMP,LRG1,PSMD1,PAK2,CLU,CALR,A2M,SERPINA5,DYNC1H1,FCN1,DSP,SERPINB12,FLG2,GARS1,XRCC5,PROS1,PLA2G2A,TF,PSMD14,PTPRC,SERPINA1,SERPINA3,ITGB3,PSMC3,SPTAN1,KNG1,HBB,NOTCH1
GO Component	GO:0099503	Secretory vesicle	50	1047	0.54	4.62e-12	9606.ENSP00000205948,9606.ENSP00000207549,9606.ENSP00000232003,9606.ENSP00000236850,9606.ENSP00000241052,9606.ENSP00000245907,9606.ENSP00000252244,9606.ENSP00000257192,9606.ENSP00000259396,9606.ENSP00000260356,9606.ENSP00000261405,9606.ENSP00000262407,9606.ENSP00000262776,9606.ENSP00000263100,9606.ENSP00000268182,9606.ENSP00000271638,9606.ENSP00000279227,9606.ENSP00000284981,9606.ENSP00000286713,…	APOH,UNC13D,HRG,APOA1,CAT,C3,KRT1,DSG1,ORM1,THBS1,VWF,ITGA2B,LGALS3BP,A1BG,IQGAP1,S100A11,FERMT3,APP,STOM,KPNB1,CAMP,LRG1,PSMD1,PAK2,CLU,BIN1,CALR,A2M,SERPINA5,DYNC1H1,FCN1,DSP,SERPINB12,FLG2,GARS1,XRCC5,PROS1,PLA2G2A,TF,PSMD14,PTPRC,SERPINA1,SERPINA3,ITGB3,PTPRS,PSMC3,SPTAN1,KNG1,HBB,NOTCH1
GO Component	GO:0031091	Platelet alpha granule	16	89	1.11	9.49e-11	9606.ENSP00000232003,9606.ENSP00000259396,9606.ENSP00000260356,9606.ENSP00000261405,9606.ENSP00000262407,9606.ENSP00000263100,9606.ENSP00000279227,9606.ENSP00000284981,9606.ENSP00000315130,9606.ENSP00000323929,9606.ENSP00000333203,9606.ENSP00000377783,9606.ENSP00000416066,9606.ENSP00000450540,9606.ENSP00000452786,9606.ENSP00000493985	HRG,ORM1,THBS1,VWF,ITGA2B,A1BG,FERMT3,APP,CLU,A2M,SERPINA5,PROS1,SERPINA1,SERPINA3,ITGB3,KNG1
GO Component	GO:0043227	Membrane-bounded organelle	234	13188	0.11	3.37e-10	9606.ENSP00000012443,9606.ENSP00000167586,9606.ENSP00000200676,9606.ENSP00000205948,9606.ENSP00000207549,9606.ENSP00000212355,9606.ENSP00000215727,9606.ENSP00000217133,9606.ENSP00000217407,9606.ENSP00000218099,9606.ENSP00000222271,9606.ENSP00000222381,9606.ENSP00000222399,9606.ENSP00000223061,9606.ENSP00000223357,9606.ENSP00000223642,9606.ENSP00000225655,9606.ENSP00000226218,9606.ENSP00000226355,…	PPP5C,KRT14,CETP,APOH,UNC13D,TGFBR3,SERPIND1,TUBB1,LBP,F9,COMP,PON1,LAMB1,PCOLCE,AEBP1,C5,PFN1,VTN,AFM,APOC3,USP5,GPLD1,HRG,APOB,APOA1,CAT,PEPD,C3,UROD,KRT13,CANX,KRT5,KRT1,PLVAP,PXDN,BPIFB1,ACSS2,F12,APCS,NOTCH2,DSG1,FHOD1,LAMC1,ORM1,THBS1,VWF,AARS1,ELOB,ITGA2B,SLC4A1,PRDX1,LGALS3BP,MAPK3,A1BG,NOTCH3,C9,CLASP1,NID1,CP,TNC,PRDX5,HPX,LUM,IQGAP1,CDH11,KRT10,PGD,S100A11,ITIH1,ALDH1L1,FERMT3,APP,STOM…
GO Component	GO:0099512	Supramolecular fiber	45	1000	0.51	6.3e-10	9606.ENSP00000167586,9606.ENSP00000217133,9606.ENSP00000246635,9606.ENSP00000252242,9606.ENSP00000252244,9606.ENSP00000262418,9606.ENSP00000263710,9606.ENSP00000266718,9606.ENSP00000268182,9606.ENSP00000269576,9606.ENSP00000279022,9606.ENSP00000295550,9606.ENSP00000303908,9606.ENSP00000305699,9606.ENSP00000309953,9606.ENSP00000310861,9606.ENSP00000311905,9606.ENSP00000316779,9606.ENSP00000327145,…	KRT14,TUBB1,KRT13,KRT5,KRT1,SLC4A1,CLASP1,LUM,IQGAP1,KRT10,MYL9,COL6A3,TWF2,HOOK3,EFEMP2,KRT2,LTBP4,BIN1,FLNC,KRT7,CORO1B,KRT77,DNM3,DYNC1H1,SPTBN1,DCTN1,KRT19,COL6A1,LMNA,COL5A1,AHNAK,DSP,KRT6A,KRT18,LCP1,PSTPIP2,PPP1R12A,CORO1C,FLNB,FBN2,VIM,TTN,UPP2,HNRNPU,ENO1
GO Component	GO:0031410	Cytoplasmic vesicle	77	2482	0.35	7.62e-10	9606.ENSP00000205948,9606.ENSP00000207549,9606.ENSP00000227667,9606.ENSP00000232003,9606.ENSP00000233242,9606.ENSP00000236850,9606.ENSP00000241052,9606.ENSP00000245907,9606.ENSP00000247461,9606.ENSP00000252244,9606.ENSP00000257192,9606.ENSP00000259396,9606.ENSP00000260356,9606.ENSP00000261405,9606.ENSP00000262407,9606.ENSP00000262746,9606.ENSP00000262776,9606.ENSP00000263025,9606.ENSP00000263100,…	APOH,UNC13D,APOC3,HRG,APOB,APOA1,CAT,C3,CANX,KRT1,DSG1,ORM1,THBS1,VWF,ITGA2B,PRDX1,LGALS3BP,MAPK3,A1BG,PRDX5,HPX,IQGAP1,S100A11,FERMT3,APP,STOM,APPL1,KPNB1,CAMP,PRDX3,MAP2K1,LRG1,NPTX1,PSMD1,STAB1,PAK2,CLU,BIN1,CALR,A2M,EHD3,SERPINA5,ANG,GANAB,DYNC1H1,EPS15,FCN1,ANXA1,CLSTN1,DSP,SERPINB12,FLG2,STAB2,GARS1,XRCC5,PROS1,SEC31A,PLA2G2A,PDIA6,TF,PSMD14,RAB1A,CORO1C,PTPRC,SERPINA1,FLNB,VIM,SERPINA3,ITG…
GO Component	GO:0031093	Platelet alpha granule lumen	13	66	1.15	3.81e-09	9606.ENSP00000232003,9606.ENSP00000259396,9606.ENSP00000260356,9606.ENSP00000261405,9606.ENSP00000263100,9606.ENSP00000279227,9606.ENSP00000284981,9606.ENSP00000315130,9606.ENSP00000323929,9606.ENSP00000377783,9606.ENSP00000416066,9606.ENSP00000450540,9606.ENSP00000493985	HRG,ORM1,THBS1,VWF,A1BG,FERMT3,APP,CLU,A2M,PROS1,SERPINA1,SERPINA3,KNG1
GO Component	GO:0012505	Endomembrane system	115	4721	0.24	3.88e-09	9606.ENSP00000205948,9606.ENSP00000207549,9606.ENSP00000215727,9606.ENSP00000218099,9606.ENSP00000222399,9606.ENSP00000226218,9606.ENSP00000227667,9606.ENSP00000232003,9606.ENSP00000233242,9606.ENSP00000236850,9606.ENSP00000241052,9606.ENSP00000245907,9606.ENSP00000247461,9606.ENSP00000252244,9606.ENSP00000252804,9606.ENSP00000253496,9606.ENSP00000256646,9606.ENSP00000257192,9606.ENSP00000258341,…	APOH,UNC13D,SERPIND1,F9,LAMB1,VTN,APOC3,HRG,APOB,APOA1,CAT,C3,CANX,KRT1,PXDN,F12,NOTCH2,DSG1,LAMC1,ORM1,THBS1,VWF,ITGA2B,LGALS3BP,MAPK3,A1BG,NOTCH3,CLASP1,CP,TNC,LUM,IQGAP1,S100A11,FERMT3,APP,STOM,APPL1,KPNB1,PKDCC,COL6A3,CAMP,COL14A1,PRDX3,COL6A2,MAP2K1,LRG1,HOOK3,NPTX1,F2,PSMD1,PAK2,CLU,BIN1,APOL1,CALR,A2M,COL12A1,EHD3,MGAT1,SERPINA5,GANAB,DNM3,DYNC1H1,CACNA2D1,ITIH2,COL18A1,DCTN1,COL6A1,LMNA,A…
GO Component	GO:0005737	Cytoplasm	218	12056	0.11	4.82e-09	9606.ENSP00000012443,9606.ENSP00000167586,9606.ENSP00000205948,9606.ENSP00000207549,9606.ENSP00000212355,9606.ENSP00000215727,9606.ENSP00000217133,9606.ENSP00000218099,9606.ENSP00000222399,9606.ENSP00000223357,9606.ENSP00000225655,9606.ENSP00000226218,9606.ENSP00000226355,9606.ENSP00000227667,9606.ENSP00000229268,9606.ENSP00000230036,9606.ENSP00000232003,9606.ENSP00000233242,9606.ENSP00000236850,…	PPP5C,KRT14,APOH,UNC13D,TGFBR3,SERPIND1,TUBB1,F9,LAMB1,AEBP1,PFN1,VTN,AFM,APOC3,USP5,GPLD1,HRG,APOB,APOA1,CAT,C3,UROD,KRT13,CANX,KRT5,KRT1,PLVAP,PXDN,ACSS2,F12,NOTCH2,DSG1,FHOD1,LAMC1,ORM1,THBS1,VWF,AARS1,ELOB,ITGA2B,SLC4A1,PRDX1,LGALS3BP,MAPK3,A1BG,NOTCH3,CLASP1,CP,TNC,PRDX5,HPX,LUM,IQGAP1,CDH11,KRT10,PGD,S100A11,ALDH1L1,MYL9,FERMT3,APP,STOM,APPL1,KPNB1,PKDCC,COL6A3,CAMP,COL14A1,PRDX3,COL6A2,GLO…
GO Component	GO:0005829	Cytosol	126	5438	0.22	6.07e-09	9606.ENSP00000012443,9606.ENSP00000167586,9606.ENSP00000207549,9606.ENSP00000225655,9606.ENSP00000229268,9606.ENSP00000233242,9606.ENSP00000236850,9606.ENSP00000241052,9606.ENSP00000246337,9606.ENSP00000246635,9606.ENSP00000252242,9606.ENSP00000252244,9606.ENSP00000253382,9606.ENSP00000257192,9606.ENSP00000258201,9606.ENSP00000261772,9606.ENSP00000262306,9606.ENSP00000262746,9606.ENSP00000263025,…	PPP5C,KRT14,UNC13D,PFN1,USP5,APOB,APOA1,CAT,UROD,KRT13,KRT5,KRT1,ACSS2,DSG1,FHOD1,AARS1,ELOB,PRDX1,MAPK3,NOTCH3,CLASP1,PRDX5,IQGAP1,KRT10,PGD,ALDH1L1,MYL9,APP,APPL1,KPNB1,PRDX3,PRDX2,MAP2K1,HSPA4,HOOK3,PSMD1,KRT2,OXSR1,GNAI2,PAK2,CLU,TLN1,BIN1,CALR,HMGCS1,EHD3,FLNC,KRT7,ANG,UBA1,PKLR,CORO1B,KRT77,RPL22,DYNC1H1,SPTBN1,GFPT1,CNDP1,NAE1,PCBP2,DCTN1,KRT19,FH,AGT,ACAT2,NIBAN1,LMNA,SERBP1,EPS15,NIBAN2,…
GO Component	GO:0034385	Triglyceride-rich plasma lipoprotein particle	9	21	1.49	1.04e-08	9606.ENSP00000205948,9606.ENSP00000227667,9606.ENSP00000233242,9606.ENSP00000236850,9606.ENSP00000284981,9606.ENSP00000317674,9606.ENSP00000387654,9606.ENSP00000466775,9606.ENSP00000468236	APOH,APOC3,APOB,APOA1,APP,APOL1,PCYOX1,APOC2,APOC4
GO Component	GO:0043226	Organelle	239	14017	0.09	1.5e-08	9606.ENSP00000012443,9606.ENSP00000167586,9606.ENSP00000200676,9606.ENSP00000205948,9606.ENSP00000207549,9606.ENSP00000212355,9606.ENSP00000215727,9606.ENSP00000217133,9606.ENSP00000217407,9606.ENSP00000218099,9606.ENSP00000222271,9606.ENSP00000222381,9606.ENSP00000222399,9606.ENSP00000223061,9606.ENSP00000223357,9606.ENSP00000223642,9606.ENSP00000225655,9606.ENSP00000226218,9606.ENSP00000226355,…	PPP5C,KRT14,CETP,APOH,UNC13D,TGFBR3,SERPIND1,TUBB1,LBP,F9,COMP,PON1,LAMB1,PCOLCE,AEBP1,C5,PFN1,VTN,AFM,APOC3,USP5,GPLD1,HRG,APOB,APOA1,CAT,PEPD,C3,UROD,KRT13,CANX,KRT5,KRT1,PLVAP,PXDN,BPIFB1,ACSS2,F12,APCS,NOTCH2,DSG1,FHOD1,LAMC1,ORM1,THBS1,VWF,AARS1,ELOB,ITGA2B,SLC4A1,PRDX1,LGALS3BP,MAPK3,A1BG,NOTCH3,C9,CLASP1,NID1,CP,TNC,PRDX5,HPX,LUM,IQGAP1,CDH11,KRT10,PGD,S100A11,ITIH1,ALDH1L1,MYL9,FERMT3,APP…
GO Component	GO:0030055	Cell-substrate junction	26	426	0.64	4.78e-08	9606.ENSP00000225655,9606.ENSP00000241052,9606.ENSP00000262407,9606.ENSP00000263025,9606.ENSP00000265131,9606.ENSP00000268182,9606.ENSP00000279227,9606.ENSP00000302486,9606.ENSP00000316029,9606.ENSP00000320866,9606.ENSP00000327116,9606.ENSP00000327145,9606.ENSP00000340211,9606.ENSP00000346088,9606.ENSP00000352438,9606.ENSP00000363827,9606.ENSP00000366109,9606.ENSP00000367263,9606.ENSP00000381581,…	PFN1,CAT,ITGA2B,MAPK3,TNC,IQGAP1,FERMT3,MAP2K1,TLN1,CALR,EHD3,FLNC,CORO1B,RPL22,PCBP2,HSPG2,ANXA1,AHNAK,LCP1,RPS14,PPP1R12A,CORO1C,PTPRC,FLNB,VIM,ITGB3
GO Component	GO:0099080	Supramolecular complex	49	1366	0.41	9.02e-08	9606.ENSP00000167586,9606.ENSP00000217133,9606.ENSP00000246635,9606.ENSP00000252242,9606.ENSP00000252244,9606.ENSP00000262418,9606.ENSP00000263710,9606.ENSP00000266718,9606.ENSP00000268182,9606.ENSP00000269576,9606.ENSP00000279022,9606.ENSP00000290158,9606.ENSP00000295550,9606.ENSP00000303908,9606.ENSP00000305699,9606.ENSP00000309953,9606.ENSP00000310861,9606.ENSP00000311905,9606.ENSP00000316779,…	KRT14,TUBB1,KRT13,KRT5,KRT1,SLC4A1,CLASP1,LUM,IQGAP1,KRT10,MYL9,KPNB1,COL6A3,TWF2,HOOK3,EFEMP2,KRT2,LTBP4,BIN1,NCL,FLNC,KRT7,CORO1B,KRT77,DNM3,DYNC1H1,SPTBN1,DCTN1,KRT19,COL6A1,LMNA,COL5A1,AHNAK,DSP,KRT6A,KRT18,CARHSP1,LCP1,PSTPIP2,PPP1R12A,CORO1C,FLNB,FBN2,VIM,TTN,UPP2,PSMC3,HNRNPU,ENO1
GO Component	GO:0005925	Focal adhesion	25	416	0.64	1.31e-07	9606.ENSP00000225655,9606.ENSP00000241052,9606.ENSP00000262407,9606.ENSP00000263025,9606.ENSP00000265131,9606.ENSP00000268182,9606.ENSP00000302486,9606.ENSP00000316029,9606.ENSP00000320866,9606.ENSP00000327116,9606.ENSP00000327145,9606.ENSP00000340211,9606.ENSP00000346088,9606.ENSP00000352438,9606.ENSP00000363827,9606.ENSP00000366109,9606.ENSP00000367263,9606.ENSP00000381581,9606.ENSP00000385958,…	PFN1,CAT,ITGA2B,MAPK3,TNC,IQGAP1,MAP2K1,TLN1,CALR,EHD3,FLNC,CORO1B,RPL22,PCBP2,HSPG2,ANXA1,AHNAK,LCP1,RPS14,PPP1R12A,CORO1C,PTPRC,FLNB,VIM,ITGB3
GO Component	GO:0034361	Very-low-density lipoprotein particle	8	20	1.46	1.5e-07	9606.ENSP00000205948,9606.ENSP00000227667,9606.ENSP00000233242,9606.ENSP00000236850,9606.ENSP00000317674,9606.ENSP00000387654,9606.ENSP00000466775,9606.ENSP00000468236	APOH,APOC3,APOB,APOA1,APOL1,PCYOX1,APOC2,APOC4
GO Component	GO:0001533	Cornified envelope	11	59	1.13	1.5e-07	9606.ENSP00000252244,9606.ENSP00000257192,9606.ENSP00000269576,9606.ENSP00000310861,9606.ENSP00000318195,9606.ENSP00000342710,9606.ENSP00000366109,9606.ENSP00000369129,9606.ENSP00000372218,9606.ENSP00000372221,9606.ENSP00000373370	KRT1,DSG1,KRT10,KRT2,NCL,KRT77,ANXA1,DSP,SERPINB12,SERPINB5,FLG2
GO Component	GO:0005581	Collagen trimer	13	95	0.99	1.51e-07	9606.ENSP00000266718,9606.ENSP00000291744,9606.ENSP00000295550,9606.ENSP00000297848,9606.ENSP00000300527,9606.ENSP00000313967,9606.ENSP00000325146,9606.ENSP00000352798,9606.ENSP00000355180,9606.ENSP00000360871,9606.ENSP00000360882,9606.ENSP00000363770,9606.ENSP00000371497	LUM,FCN2,COL6A3,COL14A1,COL6A2,C1QB,COL12A1,COL18A1,COL6A1,FCN1,COL5A1,C1QC,C1QTNF3
GO Component	GO:0032991	Protein-containing complex	121	5506	0.2	4.76e-07	9606.ENSP00000012443,9606.ENSP00000200676,9606.ENSP00000205948,9606.ENSP00000212355,9606.ENSP00000218099,9606.ENSP00000222271,9606.ENSP00000222381,9606.ENSP00000222399,9606.ENSP00000223642,9606.ENSP00000226218,9606.ENSP00000227667,9606.ENSP00000233242,9606.ENSP00000236850,9606.ENSP00000241052,9606.ENSP00000245907,9606.ENSP00000247461,9606.ENSP00000253496,9606.ENSP00000256646,9606.ENSP00000258341,…	PPP5C,CETP,APOH,TGFBR3,F9,COMP,PON1,LAMB1,C5,VTN,APOC3,APOB,APOA1,CAT,C3,CANX,F12,NOTCH2,LAMC1,THBS1,ELOB,ITGA2B,NOTCH3,C9,NID1,TNC,LUM,IQGAP1,CDH11,MYL9,APP,KPNB1,FCN2,COL6A3,COL14A1,PRDX3,C2,COL6A2,HOOK3,F2,PSMD1,GNAI2,C1QB,CLU,BIN1,APOL1,NCL,CALR,C7,COL12A1,SERPINA5,ANG,GANAB,RPL22,DNM3,DYNC1H1,SPTBN1,CACNA2D1,NAE1,COL18A1,C8A,DCTN1,COL6A1,FH,CFH,ATP1B1,C8B,C8G,EPS15,FCN1,COL5A1,C1QC,HSPG2,ATF…
GO Component	GO:0005579	Membrane attack complex	6	7	1.79	4.87e-07	9606.ENSP00000223642,9606.ENSP00000263408,9606.ENSP00000322061,9606.ENSP00000354458,9606.ENSP00000360281,9606.ENSP00000360697	C5,C9,C7,C8A,C8B,C8G
GO Component	GO:1905370	Serine-type endopeptidase complex	8	26	1.34	7.19e-07	9606.ENSP00000218099,9606.ENSP00000245907,9606.ENSP00000253496,9606.ENSP00000291744,9606.ENSP00000308541,9606.ENSP00000356399,9606.ENSP00000360871,9606.ENSP00000364709	F9,C3,F12,FCN2,F2,CFH,FCN1,F10
GO Component	GO:0034366	Spherical high-density lipoprotein particle	6	8	1.73	7.86e-07	9606.ENSP00000222381,9606.ENSP00000227667,9606.ENSP00000236850,9606.ENSP00000315130,9606.ENSP00000441828,9606.ENSP00000466775	PON1,APOC3,APOA1,CLU,HPR,APOC2
GO Component	GO:0110165	Cellular anatomical entity	273	18293	0.03	1.73e-06	9606.ENSP00000012443,9606.ENSP00000167586,9606.ENSP00000200676,9606.ENSP00000205948,9606.ENSP00000207549,9606.ENSP00000212355,9606.ENSP00000215727,9606.ENSP00000217133,9606.ENSP00000217407,9606.ENSP00000218099,9606.ENSP00000222271,9606.ENSP00000222381,9606.ENSP00000222399,9606.ENSP00000223061,9606.ENSP00000223357,9606.ENSP00000223642,9606.ENSP00000225655,9606.ENSP00000226218,9606.ENSP00000226355,…	PPP5C,KRT14,CETP,APOH,UNC13D,TGFBR3,SERPIND1,TUBB1,LBP,F9,COMP,PON1,LAMB1,PCOLCE,AEBP1,C5,PFN1,VTN,AFM,APOC3,USP5,GPLD1,HRG,APOB,APOA1,CAT,PEPD,C3,UROD,KRT13,CANX,KRT5,KRT1,PLVAP,PXDN,BPIFB1,ACSS2,F12,MATN2,APCS,NOTCH2,DSG1,FHOD1,LAMC1,ORM1,THBS1,VWF,AARS1,ELOB,ITGA2B,SLC4A1,PRDX1,LGALS3BP,MAPK3,A1BG,NOTCH3,C9,CLASP1,NID1,CP,TNC,PRDX5,HPX,LUM,IQGAP1,CDH11,KRT10,PGD,S100A11,ITIH1,ALDH1L1,HABP2,MYL…
GO Component	GO:0009986	Cell surface	34	894	0.44	8.12e-06	9606.ENSP00000205948,9606.ENSP00000212355,9606.ENSP00000217407,9606.ENSP00000232003,9606.ENSP00000245907,9606.ENSP00000252590,9606.ENSP00000252804,9606.ENSP00000256646,9606.ENSP00000260356,9606.ENSP00000262407,9606.ENSP00000263388,9606.ENSP00000269576,9606.ENSP00000284981,9606.ENSP00000291744,9606.ENSP00000292401,9606.ENSP00000315130,9606.ENSP00000316029,9606.ENSP00000320866,9606.ENSP00000333203,…	APOH,TGFBR3,LBP,HRG,C3,PLVAP,PXDN,NOTCH2,THBS1,ITGA2B,NOTCH3,KRT10,APP,FCN2,AZGP1,CLU,TLN1,CALR,SERPINA5,FCN1,F10,ANXA1,CLSTN1,STAB2,CXCL12,TF,PRNP,PTPRC,ITGB3,IGHD,IGHV3-72,HNRNPU,ENO1,NOTCH1
GO Component	GO:0005604	Basement membrane	11	98	0.91	1.32e-05	9606.ENSP00000222399,9606.ENSP00000226218,9606.ENSP00000252804,9606.ENSP00000258341,9606.ENSP00000264187,9606.ENSP00000265131,9606.ENSP00000309953,9606.ENSP00000336762,9606.ENSP00000352798,9606.ENSP00000360882,9606.ENSP00000363827	LAMB1,VTN,PXDN,LAMC1,NID1,TNC,EFEMP2,ANG,COL18A1,COL5A1,HSPG2
GO Component	GO:0005882	Intermediate filament	15	207	0.72	1.92e-05	9606.ENSP00000167586,9606.ENSP00000246635,9606.ENSP00000252242,9606.ENSP00000252244,9606.ENSP00000269576,9606.ENSP00000310861,9606.ENSP00000329243,9606.ENSP00000342710,9606.ENSP00000355124,9606.ENSP00000357283,9606.ENSP00000369129,9606.ENSP00000369317,9606.ENSP00000373489,9606.ENSP00000446007,9606.ENSP00000474090	KRT14,KRT13,KRT5,KRT1,KRT10,KRT2,KRT7,KRT77,KRT19,LMNA,DSP,KRT6A,KRT18,VIM,UPP2
GO Component	GO:1905369	Endopeptidase complex	11	104	0.88	2.19e-05	9606.ENSP00000218099,9606.ENSP00000245907,9606.ENSP00000253496,9606.ENSP00000291744,9606.ENSP00000308541,9606.ENSP00000309474,9606.ENSP00000356399,9606.ENSP00000360871,9606.ENSP00000364709,9606.ENSP00000386541,9606.ENSP00000481029	F9,C3,F12,FCN2,F2,PSMD1,CFH,FCN1,F10,PSMD14,PSMC3
GO Component	GO:0005783	Endoplasmic reticulum	56	2021	0.3	2.27e-05	9606.ENSP00000215727,9606.ENSP00000218099,9606.ENSP00000222399,9606.ENSP00000226218,9606.ENSP00000233242,9606.ENSP00000236850,9606.ENSP00000241052,9606.ENSP00000245907,9606.ENSP00000247461,9606.ENSP00000252804,9606.ENSP00000253496,9606.ENSP00000256646,9606.ENSP00000258341,9606.ENSP00000260356,9606.ENSP00000261405,9606.ENSP00000263025,9606.ENSP00000263388,9606.ENSP00000264613,9606.ENSP00000265131,…	SERPIND1,F9,LAMB1,VTN,APOB,APOA1,CAT,C3,CANX,PXDN,F12,NOTCH2,LAMC1,THBS1,VWF,MAPK3,NOTCH3,CP,TNC,APP,STOM,KPNB1,COL6A3,COL14A1,COL6A2,MAP2K1,F2,CLU,APOL1,CALR,COL12A1,GANAB,CACNA2D1,ITIH2,COL18A1,COL6A1,ADAMTSL4,COL5A1,MINPP1,ATF6B,F10,MAMDC2,CLSTN1,PROS1,SEC31A,PLA2G2A,MATN3,PDIA6,TF,RAB1A,TKT,PRNP,SERPINA1,ATP1A3,KNG1,NOTCH1
GO Component	GO:0070161	Anchoring junction	41	1325	0.35	7.13e-05	9606.ENSP00000225655,9606.ENSP00000241052,9606.ENSP00000257192,9606.ENSP00000258201,9606.ENSP00000262407,9606.ENSP00000263025,9606.ENSP00000265131,9606.ENSP00000268182,9606.ENSP00000268603,9606.ENSP00000271638,9606.ENSP00000279227,9606.ENSP00000284981,9606.ENSP00000302486,9606.ENSP00000314067,9606.ENSP00000316029,9606.ENSP00000320866,9606.ENSP00000327116,9606.ENSP00000327145,9606.ENSP00000340211,…	PFN1,CAT,DSG1,FHOD1,ITGA2B,MAPK3,TNC,IQGAP1,CDH11,S100A11,FERMT3,APP,MAP2K1,PAK2,TLN1,CALR,EHD3,FLNC,CORO1B,RPL22,PCBP2,ATP1B1,NIBAN2,HSPG2,ANXA1,CLSTN1,AHNAK,DSP,FSCN1,KRT18,LCP1,RPS14,PPP1R12A,CORO1C,PTPRC,C4B,FLNB,VIM,ITGB3,PTPRS,NOTCH1
GO Component	GO:0030054	Cell junction	56	2115	0.28	8.83e-05	9606.ENSP00000225655,9606.ENSP00000241052,9606.ENSP00000247461,9606.ENSP00000257192,9606.ENSP00000258201,9606.ENSP00000262407,9606.ENSP00000263025,9606.ENSP00000265131,9606.ENSP00000268182,9606.ENSP00000268603,9606.ENSP00000271638,9606.ENSP00000279227,9606.ENSP00000284981,9606.ENSP00000302486,9606.ENSP00000307549,9606.ENSP00000312999,9606.ENSP00000313967,9606.ENSP00000314067,9606.ENSP00000315130,…	PFN1,CAT,CANX,DSG1,FHOD1,ITGA2B,MAPK3,TNC,IQGAP1,CDH11,S100A11,FERMT3,APP,MAP2K1,NPTX1,GNAI2,C1QB,PAK2,CLU,TLN1,BIN1,CALR,EHD3,FLNC,CORO1B,RPL22,DNM3,SPTBN1,PCBP2,ATP1B1,NIBAN2,C1QC,HSPG2,ANXA1,CLSTN1,AHNAK,RPS6KA3,DSP,PTPRD,FSCN1,KRT18,NSF,LCP1,RPS14,PPP1R12A,CORO1C,PRNP,PTPRC,C4B,FLNB,ATP1A3,VIM,ITGB3,PTPRS,SPTAN1,NOTCH1
GO Component	GO:0045095	Keratin filament	10	100	0.86	0.00011	9606.ENSP00000167586,9606.ENSP00000246635,9606.ENSP00000252242,9606.ENSP00000252244,9606.ENSP00000269576,9606.ENSP00000310861,9606.ENSP00000329243,9606.ENSP00000342710,9606.ENSP00000369317,9606.ENSP00000373489	KRT14,KRT13,KRT5,KRT1,KRT10,KRT2,KRT7,KRT77,KRT6A,KRT18
GO Component	GO:0042627	Chylomicron	5	13	1.44	0.00013	9606.ENSP00000205948,9606.ENSP00000227667,9606.ENSP00000233242,9606.ENSP00000236850,9606.ENSP00000466775	APOH,APOC3,APOB,APOA1,APOC2
GO Component	GO:0101002	ficolin-1-rich granule	13	185	0.7	0.00013	9606.ENSP00000241052,9606.ENSP00000252244,9606.ENSP00000257192,9606.ENSP00000263100,9606.ENSP00000290158,9606.ENSP00000302621,9606.ENSP00000360871,9606.ENSP00000369129,9606.ENSP00000372218,9606.ENSP00000386541,9606.ENSP00000416066,9606.ENSP00000481029,9606.ENSP00000494175	CAT,KRT1,DSG1,A1BG,KPNB1,LRG1,FCN1,DSP,SERPINB12,PSMD14,SERPINA1,PSMC3,HBB
GO Component	GO:0034363	Intermediate-density lipoprotein particle	4	5	1.76	0.00015	9606.ENSP00000227667,9606.ENSP00000233242,9606.ENSP00000284981,9606.ENSP00000466775	APOC3,APOB,APP,APOC2
GO Component	GO:0098637	Protein complex involved in cell-matrix adhesion	5	14	1.41	0.00016	9606.ENSP00000222399,9606.ENSP00000226218,9606.ENSP00000258341,9606.ENSP00000264187,9606.ENSP00000265131	LAMB1,VTN,LAMC1,NID1,TNC
GO Component	GO:0042383	Sarcolemma	11	132	0.78	0.00016	9606.ENSP00000295550,9606.ENSP00000300527,9606.ENSP00000316779,9606.ENSP00000327145,9606.ENSP00000349320,9606.ENSP00000355124,9606.ENSP00000355180,9606.ENSP00000356790,9606.ENSP00000366109,9606.ENSP00000367263,9606.ENSP00000394496	COL6A3,COL6A2,BIN1,FLNC,CACNA2D1,KRT19,COL6A1,ATP1B1,ANXA1,AHNAK,CORO1C
GO Component	GO:0005886	Plasma membrane	112	5544	0.16	0.00016	9606.ENSP00000012443,9606.ENSP00000212355,9606.ENSP00000218099,9606.ENSP00000223642,9606.ENSP00000226218,9606.ENSP00000232003,9606.ENSP00000233242,9606.ENSP00000236850,9606.ENSP00000241052,9606.ENSP00000245907,9606.ENSP00000247461,9606.ENSP00000252244,9606.ENSP00000252590,9606.ENSP00000253496,9606.ENSP00000256646,9606.ENSP00000257192,9606.ENSP00000260356,9606.ENSP00000262407,9606.ENSP00000262418,…	PPP5C,TGFBR3,F9,C5,VTN,HRG,APOB,APOA1,CAT,C3,CANX,KRT1,PLVAP,F12,NOTCH2,DSG1,THBS1,ITGA2B,SLC4A1,MAPK3,NOTCH3,C9,NID1,CP,IQGAP1,CDH11,KRT10,APP,STOM,APPL1,FCN2,AZGP1,COL6A3,C2,COL6A2,MAP2K1,NPTX1,F2,KRT2,STAB1,GNAI2,PAK2,TLN1,BIN1,NCL,IGDCC4,CALR,C7,EHD3,FLNC,SERPINA5,CORO1B,KRT77,DNM3,SPTBN1,CACNA2D1,NAE1,C8A,KRT19,COL6A1,NIBAN1,ATP1B1,C8B,C8G,EPS15,FCN1,NIBAN2,HSPG2,F10,ANXA1,CLSTN1,AHNAK,DSP,P…
GO Component	GO:0099513	Polymeric cytoskeletal fiber	27	757	0.41	0.00037	9606.ENSP00000167586,9606.ENSP00000217133,9606.ENSP00000246635,9606.ENSP00000252242,9606.ENSP00000252244,9606.ENSP00000263710,9606.ENSP00000268182,9606.ENSP00000269576,9606.ENSP00000303908,9606.ENSP00000305699,9606.ENSP00000310861,9606.ENSP00000329243,9606.ENSP00000340211,9606.ENSP00000342710,9606.ENSP00000347457,9606.ENSP00000348965,9606.ENSP00000354791,9606.ENSP00000355124,9606.ENSP00000357283,…	KRT14,TUBB1,KRT13,KRT5,KRT1,CLASP1,IQGAP1,KRT10,TWF2,HOOK3,KRT2,KRT7,CORO1B,KRT77,DNM3,DYNC1H1,DCTN1,KRT19,LMNA,DSP,KRT6A,KRT18,LCP1,PSTPIP2,VIM,UPP2,HNRNPU
GO Component	GO:0009897	External side of plasma membrane	18	388	0.52	0.00044	9606.ENSP00000212355,9606.ENSP00000260356,9606.ENSP00000262407,9606.ENSP00000291744,9606.ENSP00000292401,9606.ENSP00000320866,9606.ENSP00000333203,9606.ENSP00000360871,9606.ENSP00000364709,9606.ENSP00000366109,9606.ENSP00000373539,9606.ENSP00000379140,9606.ENSP00000385834,9606.ENSP00000399376,9606.ENSP00000411355,9606.ENSP00000452786,9606.ENSP00000478893,9606.ENSP00000480035	TGFBR3,THBS1,ITGA2B,FCN2,AZGP1,CALR,SERPINA5,FCN1,F10,ANXA1,STAB2,CXCL12,TF,PRNP,PTPRC,ITGB3,IGHD,IGHV3-72
GO Component	GO:0098636	Protein complex involved in cell adhesion	7	52	0.99	0.00049	9606.ENSP00000222399,9606.ENSP00000226218,9606.ENSP00000258341,9606.ENSP00000262407,9606.ENSP00000264187,9606.ENSP00000265131,9606.ENSP00000452786	LAMB1,VTN,LAMC1,ITGA2B,NID1,TNC,ITGB3
GO Component	GO:1904813	ficolin-1-rich granule lumen	10	124	0.76	0.0005	9606.ENSP00000241052,9606.ENSP00000252244,9606.ENSP00000263100,9606.ENSP00000290158,9606.ENSP00000302621,9606.ENSP00000360871,9606.ENSP00000386541,9606.ENSP00000416066,9606.ENSP00000481029,9606.ENSP00000494175	CAT,KRT1,A1BG,KPNB1,LRG1,FCN1,PSMD14,SERPINA1,PSMC3,HBB
GO Component	GO:0098552	Side of membrane	23	611	0.43	0.00071	9606.ENSP00000212355,9606.ENSP00000247461,9606.ENSP00000257192,9606.ENSP00000260356,9606.ENSP00000262407,9606.ENSP00000262418,9606.ENSP00000268182,9606.ENSP00000291744,9606.ENSP00000292401,9606.ENSP00000312999,9606.ENSP00000320866,9606.ENSP00000333203,9606.ENSP00000360871,9606.ENSP00000364709,9606.ENSP00000366109,9606.ENSP00000373539,9606.ENSP00000379140,9606.ENSP00000385834,9606.ENSP00000399376,…	TGFBR3,CANX,DSG1,THBS1,ITGA2B,SLC4A1,IQGAP1,FCN2,AZGP1,GNAI2,CALR,SERPINA5,FCN1,F10,ANXA1,STAB2,CXCL12,TF,PRNP,PTPRC,ITGB3,IGHD,IGHV3-72
GO Component	GO:0071682	Endocytic vesicle lumen	5	23	1.19	0.0011	9606.ENSP00000233242,9606.ENSP00000236850,9606.ENSP00000265983,9606.ENSP00000320866,9606.ENSP00000494175	APOB,APOA1,HPX,CALR,HBB
GO Component	GO:0005938	Cell cortex	15	304	0.55	0.0011	9606.ENSP00000225655,9606.ENSP00000262418,9606.ENSP00000263710,9606.ENSP00000268182,9606.ENSP00000279022,9606.ENSP00000318195,9606.ENSP00000348965,9606.ENSP00000349259,9606.ENSP00000354791,9606.ENSP00000355124,9606.ENSP00000371798,9606.ENSP00000394496,9606.ENSP00000420213,9606.ENSP00000487444,9606.ENSP00000495530	PFN1,SLC4A1,CLASP1,IQGAP1,MYL9,NCL,DYNC1H1,SPTBN1,DCTN1,KRT19,FSCN1,CORO1C,FLNB,SPTAN1,ENO1
GO Component	GO:0030016	Myofibril	13	237	0.6	0.0013	9606.ENSP00000262418,9606.ENSP00000279022,9606.ENSP00000303908,9606.ENSP00000316779,9606.ENSP00000327145,9606.ENSP00000349259,9606.ENSP00000355124,9606.ENSP00000367263,9606.ENSP00000389168,9606.ENSP00000394496,9606.ENSP00000420213,9606.ENSP00000467141,9606.ENSP00000495530	SLC4A1,MYL9,TWF2,BIN1,FLNC,SPTBN1,KRT19,AHNAK,PPP1R12A,CORO1C,FLNB,TTN,ENO1
GO Component	GO:0015629	Actin cytoskeleton	19	482	0.45	0.0019	9606.ENSP00000263388,9606.ENSP00000268182,9606.ENSP00000279022,9606.ENSP00000279227,9606.ENSP00000303908,9606.ENSP00000316779,9606.ENSP00000336762,9606.ENSP00000340211,9606.ENSP00000349259,9606.ENSP00000355124,9606.ENSP00000367263,9606.ENSP00000371798,9606.ENSP00000381581,9606.ENSP00000387261,9606.ENSP00000389168,9606.ENSP00000394496,9606.ENSP00000420213,9606.ENSP00000467141,9606.ENSP00000487444	NOTCH3,IQGAP1,MYL9,FERMT3,TWF2,BIN1,ANG,CORO1B,SPTBN1,KRT19,AHNAK,FSCN1,LCP1,PSTPIP2,PPP1R12A,CORO1C,FLNB,TTN,SPTAN1
GO Component	GO:0005601	Classical-complement-pathway C3/C5 convertase complex	3	4	1.73	0.0024	9606.ENSP00000299367,9606.ENSP00000415941,9606.ENSP00000416561	C2,C4B,CFB
GO Component	GO:0005602	Complement component C1 complex	3	5	1.63	0.0037	9606.ENSP00000313967,9606.ENSP00000363770,9606.ENSP00000444271	C1QB,C1QC,C1R
GO Component	GO:0070820	Tertiary granule	10	164	0.64	0.004	9606.ENSP00000257192,9606.ENSP00000259396,9606.ENSP00000286713,9606.ENSP00000296435,9606.ENSP00000302621,9606.ENSP00000369129,9606.ENSP00000372218,9606.ENSP00000373370,9606.ENSP00000487444,9606.ENSP00000494175	DSG1,ORM1,STOM,CAMP,LRG1,DSP,SERPINB12,FLG2,SPTAN1,HBB
GO Component	GO:0005796	Golgi lumen	8	106	0.73	0.0047	9606.ENSP00000218099,9606.ENSP00000226218,9606.ENSP00000266718,9606.ENSP00000284981,9606.ENSP00000308541,9606.ENSP00000363827,9606.ENSP00000364709,9606.ENSP00000377783	F9,VTN,LUM,APP,F2,HSPG2,F10,PROS1
GO Component	GO:1904724	Tertiary granule lumen	6	55	0.89	0.0049	9606.ENSP00000259396,9606.ENSP00000296435,9606.ENSP00000302621,9606.ENSP00000373370,9606.ENSP00000487444,9606.ENSP00000494175	ORM1,CAMP,LRG1,FLG2,SPTAN1,HBB
GO Component	GO:0098797	Plasma membrane protein complex	20	589	0.39	0.0078	9606.ENSP00000212355,9606.ENSP00000223642,9606.ENSP00000226218,9606.ENSP00000262407,9606.ENSP00000263408,9606.ENSP00000268603,9606.ENSP00000312999,9606.ENSP00000322061,9606.ENSP00000349320,9606.ENSP00000354458,9606.ENSP00000356790,9606.ENSP00000360281,9606.ENSP00000360697,9606.ENSP00000360798,9606.ENSP00000363827,9606.ENSP00000367263,9606.ENSP00000385834,9606.ENSP00000394496,9606.ENSP00000444688,…	TGFBR3,C5,VTN,ITGA2B,C9,CDH11,GNAI2,C7,CACNA2D1,C8A,ATP1B1,C8B,C8G,EPS15,HSPG2,AHNAK,TF,CORO1C,ATP1A3,ITGB3
GO Component	GO:0030017	Sarcomere	11	217	0.56	0.0084	9606.ENSP00000262418,9606.ENSP00000279022,9606.ENSP00000316779,9606.ENSP00000327145,9606.ENSP00000349259,9606.ENSP00000355124,9606.ENSP00000389168,9606.ENSP00000394496,9606.ENSP00000420213,9606.ENSP00000467141,9606.ENSP00000495530	SLC4A1,MYL9,BIN1,FLNC,SPTBN1,KRT19,PPP1R12A,CORO1C,FLNB,TTN,ENO1
GO Component	GO:0031232	Extrinsic component of external side of plasma membrane	3	9	1.38	0.013	9606.ENSP00000360871,9606.ENSP00000366109,9606.ENSP00000385834	FCN1,ANXA1,TF
GO Component	GO:0030018	Z disc	8	131	0.64	0.0169	9606.ENSP00000262418,9606.ENSP00000279022,9606.ENSP00000316779,9606.ENSP00000327145,9606.ENSP00000355124,9606.ENSP00000389168,9606.ENSP00000420213,9606.ENSP00000467141	SLC4A1,MYL9,BIN1,FLNC,KRT19,PPP1R12A,FLNB,TTN
GO Component	GO:0048471	Perinuclear region of cytoplasm	22	727	0.34	0.0171	9606.ENSP00000222399,9606.ENSP00000252590,9606.ENSP00000265462,9606.ENSP00000284981,9606.ENSP00000286713,9606.ENSP00000303908,9606.ENSP00000314067,9606.ENSP00000315130,9606.ENSP00000320866,9606.ENSP00000327116,9606.ENSP00000332073,9606.ENSP00000340211,9606.ENSP00000347457,9606.ENSP00000357283,9606.ENSP00000357362,9606.ENSP00000360034,9606.ENSP00000373489,9606.ENSP00000378721,9606.ENSP00000380070,…	LAMB1,PLVAP,PRDX5,APP,STOM,TWF2,PAK2,CLU,CALR,EHD3,MGAT1,CORO1B,DNM3,LMNA,THBS3,SERBP1,KRT18,SEC31A,GAPDH,LCP1,PLA2G2A,TF
GO Component	GO:0005911	Cell-cell junction	17	499	0.39	0.02	9606.ENSP00000257192,9606.ENSP00000258201,9606.ENSP00000268182,9606.ENSP00000268603,9606.ENSP00000271638,9606.ENSP00000284981,9606.ENSP00000314067,9606.ENSP00000316029,9606.ENSP00000356790,9606.ENSP00000362409,9606.ENSP00000366109,9606.ENSP00000367263,9606.ENSP00000369129,9606.ENSP00000371798,9606.ENSP00000373489,9606.ENSP00000452786,9606.ENSP00000498587	DSG1,FHOD1,IQGAP1,CDH11,S100A11,APP,PAK2,TLN1,ATP1B1,NIBAN2,ANXA1,AHNAK,DSP,FSCN1,KRT18,ITGB3,NOTCH1
GO Component	GO:0005769	Early endosome	15	411	0.42	0.0205	9606.ENSP00000227667,9606.ENSP00000233242,9606.ENSP00000236850,9606.ENSP00000263025,9606.ENSP00000284981,9606.ENSP00000288266,9606.ENSP00000298510,9606.ENSP00000302486,9606.ENSP00000327116,9606.ENSP00000360798,9606.ENSP00000366109,9606.ENSP00000385834,9606.ENSP00000387286,9606.ENSP00000466775,9606.ENSP00000498872	APOC3,APOB,APOA1,MAPK3,APP,APPL1,PRDX3,MAP2K1,EHD3,EPS15,ANXA1,TF,RAB1A,APOC2,SNX6
GO Component	GO:0016020	Membrane	159	9523	0.08	0.0209	9606.ENSP00000012443,9606.ENSP00000207549,9606.ENSP00000212355,9606.ENSP00000217407,9606.ENSP00000218099,9606.ENSP00000222399,9606.ENSP00000223642,9606.ENSP00000225655,9606.ENSP00000226218,9606.ENSP00000230036,9606.ENSP00000232003,9606.ENSP00000233242,9606.ENSP00000236850,9606.ENSP00000241052,9606.ENSP00000245907,9606.ENSP00000247461,9606.ENSP00000252242,9606.ENSP00000252244,9606.ENSP00000252590,…	PPP5C,UNC13D,TGFBR3,LBP,F9,LAMB1,C5,PFN1,VTN,GPLD1,HRG,APOB,APOA1,CAT,C3,CANX,KRT5,KRT1,PLVAP,F12,NOTCH2,DSG1,FHOD1,THBS1,AARS1,ITGA2B,SLC4A1,LGALS3BP,MAPK3,NOTCH3,C9,CLASP1,NID1,CP,TNC,IQGAP1,CDH11,KRT10,FERMT3,APP,STOM,APPL1,KPNB1,FCN2,AZGP1,COL6A3,C2,COL6A2,MAP2K1,LRG1,NPTX1,F2,PSMD1,KRT2,STAB1,GNAI2,PAK2,CLU,TLN1,BIN1,APOL1,NCL,IGDCC4,CALR,C7,EHD3,FLNC,HHIPL1,MGAT1,SERPINA5,CORO1B,GANAB,KRT77…
GO Component	GO:0005614	Interstitial matrix	3	12	1.25	0.0241	9606.ENSP00000265131,9606.ENSP00000297848,9606.ENSP00000358035	TNC,COL14A1,ADAMTSL4
GO Component	GO:0034362	Low-density lipoprotein particle	3	12	1.25	0.0241	9606.ENSP00000233242,9606.ENSP00000381250,9606.ENSP00000466775	APOB,APOF,APOC2
GO Component	GO:0005775	Vacuolar lumen	9	175	0.57	0.0241	9606.ENSP00000207549,9606.ENSP00000233242,9606.ENSP00000245907,9606.ENSP00000266718,9606.ENSP00000309474,9606.ENSP00000348965,9606.ENSP00000363827,9606.ENSP00000421725,9606.ENSP00000450540	UNC13D,APOB,C3,LUM,PSMD1,DYNC1H1,HSPG2,GC,SERPINA3
GO Component	GO:0098978	Glutamatergic synapse	13	334	0.45	0.0243	9606.ENSP00000225655,9606.ENSP00000247461,9606.ENSP00000268603,9606.ENSP00000307549,9606.ENSP00000314067,9606.ENSP00000316779,9606.ENSP00000346088,9606.ENSP00000347457,9606.ENSP00000349259,9606.ENSP00000366513,9606.ENSP00000370593,9606.ENSP00000452786,9606.ENSP00000467537	PFN1,CANX,CDH11,NPTX1,PAK2,BIN1,RPL22,DNM3,SPTBN1,CLSTN1,PTPRD,ITGB3,PTPRS
GO Component	GO:0005589	Collagen type VI trimer	2	2	1.86	0.0249	9606.ENSP00000295550,9606.ENSP00000355180	COL6A3,COL6A1
GO Component	GO:0005790	Smooth endoplasmic reticulum	4	30	0.98	0.0249	9606.ENSP00000233242,9606.ENSP00000247461,9606.ENSP00000284981,9606.ENSP00000320866	APOB,CANX,APP,CALR
GO Component	GO:0042470	Melanosome	7	109	0.66	0.0249	9606.ENSP00000247461,9606.ENSP00000262746,9606.ENSP00000286713,9606.ENSP00000340466,9606.ENSP00000385385,9606.ENSP00000387286,9606.ENSP00000452786	CANX,PRDX1,STOM,GANAB,PDIA6,RAB1A,ITGB3
GO Component	GO:0005856	Cytoskeleton	51	2369	0.19	0.0249	9606.ENSP00000167586,9606.ENSP00000217133,9606.ENSP00000225655,9606.ENSP00000246635,9606.ENSP00000252242,9606.ENSP00000252244,9606.ENSP00000258201,9606.ENSP00000262418,9606.ENSP00000263025,9606.ENSP00000263388,9606.ENSP00000263710,9606.ENSP00000268182,9606.ENSP00000269576,9606.ENSP00000279022,9606.ENSP00000279227,9606.ENSP00000284981,9606.ENSP00000286713,9606.ENSP00000302486,9606.ENSP00000303908,…	KRT14,TUBB1,PFN1,KRT13,KRT5,KRT1,FHOD1,SLC4A1,MAPK3,NOTCH3,CLASP1,IQGAP1,KRT10,MYL9,FERMT3,APP,STOM,MAP2K1,TWF2,HOOK3,KRT2,GNAI2,TLN1,BIN1,FLNC,KRT7,ANG,CORO1B,KRT77,DNM3,DYNC1H1,SPTBN1,DCTN1,KRT19,LMNA,AHNAK,DSP,KRT6A,FSCN1,KRT18,GAPDH,LCP1,PSTPIP2,PPP1R12A,CORO1C,FLNB,VIM,TTN,UPP2,SPTAN1,HNRNPU
GO Component	GO:0001527	Microfibril	3	13	1.22	0.0264	9606.ENSP00000309953,9606.ENSP00000311905,9606.ENSP00000424571	EFEMP2,LTBP4,FBN2
GO Component	GO:0070013	Intracellular organelle lumen	102	5660	0.11	0.0327	9606.ENSP00000012443,9606.ENSP00000205948,9606.ENSP00000207549,9606.ENSP00000215727,9606.ENSP00000218099,9606.ENSP00000222399,9606.ENSP00000226218,9606.ENSP00000232003,9606.ENSP00000233242,9606.ENSP00000236850,9606.ENSP00000241052,9606.ENSP00000245907,9606.ENSP00000246337,9606.ENSP00000247461,9606.ENSP00000252244,9606.ENSP00000253382,9606.ENSP00000256646,9606.ENSP00000258201,9606.ENSP00000258341,…	PPP5C,APOH,UNC13D,SERPIND1,F9,LAMB1,VTN,HRG,APOB,APOA1,CAT,C3,UROD,CANX,KRT1,ACSS2,NOTCH2,FHOD1,LAMC1,ORM1,THBS1,VWF,ELOB,LGALS3BP,MAPK3,A1BG,NOTCH3,CP,TNC,PRDX5,HPX,LUM,S100A11,FERMT3,APP,KPNB1,COL6A3,CAMP,COL14A1,PRDX3,COL6A2,LRG1,F2,PSMD1,GNAI2,CLU,APOL1,NCL,CALR,A2M,COL12A1,ANG,UBA1,GANAB,DYNC1H1,SPTBN1,ITIH2,PCBP2,COL18A1,COL6A1,FH,LMNA,ADAMTSL4,FUBP1,FCN1,COL5A1,MINPP1,NIBAN2,HSPG2,F10,ANXA…
GO Component	GO:0005606	laminin-1 complex	2	3	1.68	0.0366	9606.ENSP00000222399,9606.ENSP00000258341	LAMB1,LAMC1
GO Component	GO:0030934	Anchoring collagen complex	2	3	1.68	0.0366	9606.ENSP00000297848,9606.ENSP00000325146	COL14A1,COL12A1
GO Component	GO:0043259	laminin-10 complex	2	3	1.68	0.0366	9606.ENSP00000222399,9606.ENSP00000258341	LAMB1,LAMC1
GO Component	GO:0062167	Complement component C1q complex	2	3	1.68	0.0366	9606.ENSP00000313967,9606.ENSP00000363770	C1QB,C1QC
GO Component	GO:0071062	alphav-beta3 integrin-vitronectin complex	2	3	1.68	0.0366	9606.ENSP00000226218,9606.ENSP00000452786	VTN,ITGB3
GO Component	GO:0043034	Costamere	3	16	1.13	0.0402	9606.ENSP00000327145,9606.ENSP00000355124,9606.ENSP00000367263	FLNC,KRT19,AHNAK
GO Component	GO:0005764	Lysosome	21	746	0.31	0.0409	9606.ENSP00000207549,9606.ENSP00000229268,9606.ENSP00000230036,9606.ENSP00000232003,9606.ENSP00000233242,9606.ENSP00000241052,9606.ENSP00000245907,9606.ENSP00000264613,9606.ENSP00000266718,9606.ENSP00000286713,9606.ENSP00000309474,9606.ENSP00000320866,9606.ENSP00000348965,9606.ENSP00000355180,9606.ENSP00000363827,9606.ENSP00000367263,9606.ENSP00000381293,9606.ENSP00000387654,9606.ENSP00000421725,…	UNC13D,USP5,GPLD1,HRG,APOB,CAT,C3,CP,LUM,STOM,PSMD1,CALR,DYNC1H1,COL6A1,HSPG2,AHNAK,NSF,PCYOX1,GC,SERPINA3,SNX6
GO Component	GO:0035580	Specific granule lumen	5	62	0.76	0.0421	9606.ENSP00000259396,9606.ENSP00000290158,9606.ENSP00000296435,9606.ENSP00000302621,9606.ENSP00000487444	ORM1,KPNB1,CAMP,LRG1,SPTAN1
GO Component	GO:0031672	A band	4	38	0.88	0.0475	9606.ENSP00000349259,9606.ENSP00000389168,9606.ENSP00000467141,9606.ENSP00000495530	SPTBN1,PPP1R12A,TTN,ENO1
GO Function	GO:0050839	Cell adhesion molecule binding	46	560	0.77	1.03e-17	9606.ENSP00000222271,9606.ENSP00000222399,9606.ENSP00000225655,9606.ENSP00000226218,9606.ENSP00000260356,9606.ENSP00000261405,9606.ENSP00000262407,9606.ENSP00000262746,9606.ENSP00000263388,9606.ENSP00000268182,9606.ENSP00000268603,9606.ENSP00000271638,9606.ENSP00000279227,9606.ENSP00000284981,9606.ENSP00000301329,9606.ENSP00000303908,9606.ENSP00000311905,9606.ENSP00000314067,9606.ENSP00000316029,…	COMP,LAMB1,PFN1,VTN,THBS1,VWF,ITGA2B,PRDX1,NOTCH3,IQGAP1,CDH11,S100A11,FERMT3,APP,GLOD4,TWF2,LTBP4,PAK2,TLN1,CALR,CORO1B,SPTBN1,SERBP1,EPS15,COL5A1,NIBAN2,HSPG2,ANXA1,AHNAK,POSTN,DSP,PFKP,PTPRD,FSCN1,KRT18,CXCL12,LCP1,PAICS,RAB1A,TNXB,FLNB,LDHA,ITGB3,SPTAN1,PTPN11,ENO1
GO Function	GO:0005509	Calcium ion binding	50	717	0.7	5.67e-17	9606.ENSP00000218099,9606.ENSP00000222271,9606.ENSP00000222381,9606.ENSP00000247461,9606.ENSP00000253496,9606.ENSP00000254898,9606.ENSP00000255040,9606.ENSP00000256646,9606.ENSP00000257192,9606.ENSP00000260356,9606.ENSP00000263388,9606.ENSP00000264187,9606.ENSP00000268182,9606.ENSP00000268603,9606.ENSP00000271638,9606.ENSP00000273283,9606.ENSP00000277903,9606.ENSP00000279022,9606.ENSP00000308541,…	F9,COMP,PON1,CANX,F12,MATN2,APCS,NOTCH2,DSG1,THBS1,NOTCH3,NID1,IQGAP1,CDH11,S100A11,ITIH1,HABP2,MYL9,F2,SNED1,EFEMP2,LTBP4,STAB1,CALR,SPOCK2,EHD3,THBS3,EPS15,MATN4,MATN1,SVEP1,HSPG2,F10,ANXA1,CLSTN1,FLG2,STAB2,PROS1,EFEMP1,LCP1,PLA2G2A,MATN3,TKT,PRNP,CPS1,FBN2,C1R,TTN,SPTAN1,NOTCH1
GO Function	GO:0005198	Structural molecule activity	51	776	0.67	1.66e-16	9606.ENSP00000167586,9606.ENSP00000217133,9606.ENSP00000222271,9606.ENSP00000222399,9606.ENSP00000226218,9606.ENSP00000246635,9606.ENSP00000252242,9606.ENSP00000252244,9606.ENSP00000252804,9606.ENSP00000254898,9606.ENSP00000258341,9606.ENSP00000260356,9606.ENSP00000264187,9606.ENSP00000265131,9606.ENSP00000266718,9606.ENSP00000269576,9606.ENSP00000279022,9606.ENSP00000295550,9606.ENSP00000297848,…	KRT14,TUBB1,COMP,LAMB1,VTN,KRT13,KRT5,KRT1,PXDN,MATN2,LAMC1,THBS1,NID1,TNC,LUM,KRT10,MYL9,COL6A3,COL14A1,COL6A2,EFEMP2,KRT2,LTBP4,TLN1,COL12A1,KRT7,KRT77,RPL22,DNM3,SPTBN1,COL18A1,KRT19,COL6A1,LMNA,COL5A1,MATN1,HSPG2,AHNAK,DSP,KRT6A,PTPRD,FLG2,KRT18,SEC31A,MATN3,RPS14,TNXB,FBN2,VIM,TTN,SPTAN1
GO Function	GO:0005539	Glycosaminoglycan binding	31	245	0.96	2.04e-16	9606.ENSP00000205948,9606.ENSP00000212355,9606.ENSP00000215727,9606.ENSP00000222271,9606.ENSP00000223061,9606.ENSP00000226218,9606.ENSP00000232003,9606.ENSP00000233242,9606.ENSP00000260356,9606.ENSP00000273283,9606.ENSP00000277903,9606.ENSP00000284981,9606.ENSP00000308541,9606.ENSP00000309953,9606.ENSP00000311905,9606.ENSP00000312946,9606.ENSP00000321108,9606.ENSP00000333203,9606.ENSP00000336762,…	APOH,TGFBR3,SERPIND1,COMP,PCOLCE,VTN,HRG,APOB,THBS1,ITIH1,HABP2,APP,F2,EFEMP2,LTBP4,STAB1,SPOCK2,SERPINA5,ANG,RPL22,ITIH2,CFH,THBS3,COL5A1,POSTN,STAB2,PRNP,TNXB,PTPRC,PTPRS,KNG1
GO Function	GO:0005515	Protein binding	175	7242	0.24	2.04e-16	9606.ENSP00000012443,9606.ENSP00000205948,9606.ENSP00000207549,9606.ENSP00000212355,9606.ENSP00000217407,9606.ENSP00000222271,9606.ENSP00000222381,9606.ENSP00000222399,9606.ENSP00000223357,9606.ENSP00000223642,9606.ENSP00000225655,9606.ENSP00000226218,9606.ENSP00000227667,9606.ENSP00000229268,9606.ENSP00000232003,9606.ENSP00000233242,9606.ENSP00000236850,9606.ENSP00000241052,9606.ENSP00000245907,…	PPP5C,APOH,UNC13D,TGFBR3,LBP,COMP,PON1,LAMB1,AEBP1,C5,PFN1,VTN,APOC3,USP5,HRG,APOB,APOA1,CAT,C3,CANX,KRT5,KRT1,PLVAP,PXDN,F12,APCS,NOTCH2,DSG1,FHOD1,THBS1,VWF,ELOB,ITGA2B,SLC4A1,PRDX1,MAPK3,NOTCH3,CLASP1,NID1,CP,TNC,PRDX5,IQGAP1,CDH11,KRT10,S100A11,MYL9,FERMT3,APP,STOM,APPL1,KPNB1,FCN2,PRDX3,GLOD4,MAP2K1,LRG1,TWF2,HOOK3,F2,SNED1,PSMD1,EFEMP2,KRT2,OXSR1,LTBP4,GNAI2,C1QB,PAK2,CLU,TLN1,BIN1,NCL,CALR…
GO Function	GO:0005201	Extracellular matrix structural constituent	24	131	1.12	1.09e-15	9606.ENSP00000222271,9606.ENSP00000222399,9606.ENSP00000226218,9606.ENSP00000252804,9606.ENSP00000254898,9606.ENSP00000258341,9606.ENSP00000260356,9606.ENSP00000264187,9606.ENSP00000265131,9606.ENSP00000266718,9606.ENSP00000295550,9606.ENSP00000297848,9606.ENSP00000300527,9606.ENSP00000309953,9606.ENSP00000311905,9606.ENSP00000325146,9606.ENSP00000352798,9606.ENSP00000355180,9606.ENSP00000360882,…	COMP,LAMB1,VTN,PXDN,MATN2,LAMC1,THBS1,NID1,TNC,LUM,COL6A3,COL14A1,COL6A2,EFEMP2,LTBP4,COL12A1,COL18A1,COL6A1,COL5A1,MATN1,HSPG2,MATN3,TNXB,FBN2
GO Function	GO:0005488	Binding	242	12838	0.13	1.89e-15	9606.ENSP00000012443,9606.ENSP00000167586,9606.ENSP00000200676,9606.ENSP00000205948,9606.ENSP00000207549,9606.ENSP00000212355,9606.ENSP00000215727,9606.ENSP00000217133,9606.ENSP00000217407,9606.ENSP00000218099,9606.ENSP00000222271,9606.ENSP00000222381,9606.ENSP00000222399,9606.ENSP00000223061,9606.ENSP00000223357,9606.ENSP00000223642,9606.ENSP00000225655,9606.ENSP00000226218,9606.ENSP00000226355,…	PPP5C,KRT14,CETP,APOH,UNC13D,TGFBR3,SERPIND1,TUBB1,LBP,F9,COMP,PON1,LAMB1,PCOLCE,AEBP1,C5,PFN1,VTN,AFM,APOC3,USP5,HRG,APOB,APOA1,LGALSL,CAT,PEPD,C3,CANX,KRT5,KRT1,PLVAP,PXDN,BPIFB1,ACSS2,F12,MATN2,APCS,NOTCH2,DSG1,FHOD1,THBS1,VWF,AARS1,ELOB,ITGA2B,SLC4A1,PRDX1,MAPK3,NOTCH3,CLASP1,NID1,CP,TNC,PRDX5,HPX,LUM,IQGAP1,CDH11,KRT10,PGD,S100A11,ITIH1,HABP2,MYL9,FERMT3,APP,STOM,APPL1,KPNB1,FCN2,PKDCC,CAMP,…
GO Function	GO:0061135	Endopeptidase regulator activity	27	191	1.01	2e-15	9606.ENSP00000215727,9606.ENSP00000223642,9606.ENSP00000232003,9606.ENSP00000245907,9606.ENSP00000265462,9606.ENSP00000273283,9606.ENSP00000284981,9606.ENSP00000295550,9606.ENSP00000298510,9606.ENSP00000316779,9606.ENSP00000321108,9606.ENSP00000323929,9606.ENSP00000333203,9606.ENSP00000342850,9606.ENSP00000351190,9606.ENSP00000355627,9606.ENSP00000368884,9606.ENSP00000372218,9606.ENSP00000372221,…	SERPIND1,C5,HRG,C3,PRDX5,ITIH1,APP,COL6A3,PRDX3,BIN1,SPOCK2,A2M,SERPINA5,SERPINA6,ITIH2,AGT,RPS6KA3,SERPINB12,SERPINB5,PROS1,GAPDH,PSMD14,PRNP,C4B,SERPINA1,SERPINA3,KNG1
GO Function	GO:0004866	Endopeptidase inhibitor activity	26	177	1.02	3.21e-15	9606.ENSP00000215727,9606.ENSP00000223642,9606.ENSP00000232003,9606.ENSP00000245907,9606.ENSP00000265462,9606.ENSP00000273283,9606.ENSP00000284981,9606.ENSP00000295550,9606.ENSP00000298510,9606.ENSP00000316779,9606.ENSP00000321108,9606.ENSP00000323929,9606.ENSP00000333203,9606.ENSP00000342850,9606.ENSP00000351190,9606.ENSP00000355627,9606.ENSP00000368884,9606.ENSP00000372218,9606.ENSP00000372221,…	SERPIND1,C5,HRG,C3,PRDX5,ITIH1,APP,COL6A3,PRDX3,BIN1,SPOCK2,A2M,SERPINA5,SERPINA6,ITIH2,AGT,RPS6KA3,SERPINB12,SERPINB5,PROS1,GAPDH,PRNP,C4B,SERPINA1,SERPINA3,KNG1
GO Function	GO:0044877	Protein-containing complex binding	62	1261	0.55	3.21e-15	9606.ENSP00000167586,9606.ENSP00000212355,9606.ENSP00000222271,9606.ENSP00000222399,9606.ENSP00000223061,9606.ENSP00000223357,9606.ENSP00000226218,9606.ENSP00000232003,9606.ENSP00000236850,9606.ENSP00000255040,9606.ENSP00000258201,9606.ENSP00000260356,9606.ENSP00000261405,9606.ENSP00000262407,9606.ENSP00000264187,9606.ENSP00000266718,9606.ENSP00000268182,9606.ENSP00000279227,9606.ENSP00000284981,…	KRT14,TGFBR3,COMP,LAMB1,PCOLCE,AEBP1,VTN,HRG,APOA1,APCS,FHOD1,THBS1,VWF,ITGA2B,NID1,LUM,IQGAP1,FERMT3,APP,APPL1,COL14A1,COL6A2,TWF2,LTBP4,STAB1,GNAI2,CLU,TLN1,BIN1,CALR,FLNC,CORO1B,SPTBN1,C8A,COL6A1,ATP1B1,SERBP1,C8B,COL5A1,HSPG2,PFKP,FSCN1,STAB2,XRCC5,CXCL12,NSF,LCP1,PSMD14,PSTPIP2,CORO1C,PRNP,CPS1,TNXB,PTPRC,PLTP,FLNB,VIM,ITGB3,TTN,SPTAN1,PTPN11,HNRNPU
GO Function	GO:0061134	Peptidase regulator activity	28	227	0.95	7.79e-15	9606.ENSP00000215727,9606.ENSP00000223061,9606.ENSP00000223642,9606.ENSP00000232003,9606.ENSP00000245907,9606.ENSP00000265462,9606.ENSP00000273283,9606.ENSP00000284981,9606.ENSP00000295550,9606.ENSP00000298510,9606.ENSP00000316779,9606.ENSP00000321108,9606.ENSP00000323929,9606.ENSP00000333203,9606.ENSP00000342850,9606.ENSP00000351190,9606.ENSP00000355627,9606.ENSP00000368884,9606.ENSP00000372218,…	SERPIND1,PCOLCE,C5,HRG,C3,PRDX5,ITIH1,APP,COL6A3,PRDX3,BIN1,SPOCK2,A2M,SERPINA5,SERPINA6,ITIH2,AGT,RPS6KA3,SERPINB12,SERPINB5,PROS1,GAPDH,PSMD14,PRNP,C4B,SERPINA1,SERPINA3,KNG1
GO Function	GO:0008201	Heparin binding	23	173	0.98	1.39e-12	9606.ENSP00000205948,9606.ENSP00000212355,9606.ENSP00000215727,9606.ENSP00000222271,9606.ENSP00000223061,9606.ENSP00000226218,9606.ENSP00000232003,9606.ENSP00000233242,9606.ENSP00000260356,9606.ENSP00000284981,9606.ENSP00000308541,9606.ENSP00000309953,9606.ENSP00000333203,9606.ENSP00000336762,9606.ENSP00000346088,9606.ENSP00000356399,9606.ENSP00000357362,9606.ENSP00000360882,9606.ENSP00000369071,…	APOH,TGFBR3,SERPIND1,COMP,PCOLCE,VTN,HRG,APOB,THBS1,APP,F2,EFEMP2,SERPINA5,ANG,RPL22,CFH,THBS3,COL5A1,POSTN,TNXB,PTPRC,PTPRS,KNG1
GO Function	GO:0004857	Enzyme inhibitor activity	32	396	0.76	2.25e-12	9606.ENSP00000215727,9606.ENSP00000223642,9606.ENSP00000227667,9606.ENSP00000232003,9606.ENSP00000245907,9606.ENSP00000265462,9606.ENSP00000268182,9606.ENSP00000273283,9606.ENSP00000284981,9606.ENSP00000295550,9606.ENSP00000298510,9606.ENSP00000316779,9606.ENSP00000321108,9606.ENSP00000323929,9606.ENSP00000333203,9606.ENSP00000342850,9606.ENSP00000351190,9606.ENSP00000355627,9606.ENSP00000366109,…	SERPIND1,C5,APOC3,HRG,C3,PRDX5,IQGAP1,ITIH1,APP,COL6A3,PRDX3,BIN1,SPOCK2,A2M,SERPINA5,SERPINA6,ITIH2,AGT,ANXA1,RPS6KA3,SERPINB12,SERPINB5,PROS1,GAPDH,PPP1R12A,PRNP,C4B,SERPINA1,SERPINA3,APOC2,KNG1,NOTCH1
GO Function	GO:0005102	Signaling receptor binding	59	1499	0.45	1.84e-10	9606.ENSP00000212355,9606.ENSP00000217407,9606.ENSP00000222271,9606.ENSP00000222399,9606.ENSP00000223642,9606.ENSP00000226218,9606.ENSP00000227667,9606.ENSP00000232003,9606.ENSP00000233242,9606.ENSP00000236850,9606.ENSP00000245907,9606.ENSP00000247461,9606.ENSP00000252804,9606.ENSP00000260356,9606.ENSP00000261405,9606.ENSP00000262407,9606.ENSP00000265462,9606.ENSP00000279227,9606.ENSP00000284981,…	TGFBR3,LBP,COMP,LAMB1,C5,VTN,APOC3,HRG,APOB,APOA1,C3,CANX,PXDN,THBS1,VWF,ITGA2B,PRDX5,FERMT3,APP,FCN2,LRG1,F2,SNED1,LTBP4,GNAI2,CLU,TLN1,CALR,A2M,ANG,DNM3,AGT,FCN1,COL5A1,HSPG2,ANXA1,PTPRD,EFEMP1,CXCL12,APOF,NSF,LCP1,TF,RELN,PRNP,TNXB,PTPRC,PIK3CG,FBN2,ATP1A3,ITGB3,IGHD,CCL14,CCL18,IGHV3-72,PTPN11,KNG1,NOTCH1,SNX6
GO Function	GO:0045296	Cadherin binding	27	334	0.76	2.88e-10	9606.ENSP00000225655,9606.ENSP00000262746,9606.ENSP00000263388,9606.ENSP00000268182,9606.ENSP00000268603,9606.ENSP00000271638,9606.ENSP00000301329,9606.ENSP00000303908,9606.ENSP00000314067,9606.ENSP00000316029,9606.ENSP00000340211,9606.ENSP00000349259,9606.ENSP00000360034,9606.ENSP00000360798,9606.ENSP00000362409,9606.ENSP00000366109,9606.ENSP00000367263,9606.ENSP00000370517,9606.ENSP00000371798,…	PFN1,PRDX1,NOTCH3,IQGAP1,CDH11,S100A11,GLOD4,TWF2,PAK2,TLN1,CORO1B,SPTBN1,SERBP1,EPS15,NIBAN2,ANXA1,AHNAK,PFKP,FSCN1,KRT18,PAICS,RAB1A,FLNB,LDHA,SPTAN1,PTPN11,ENO1
GO Function	GO:0097367	Carbohydrate derivative binding	75	2278	0.37	3.42e-10	9606.ENSP00000012443,9606.ENSP00000205948,9606.ENSP00000212355,9606.ENSP00000215727,9606.ENSP00000217133,9606.ENSP00000217407,9606.ENSP00000222271,9606.ENSP00000223061,9606.ENSP00000226218,9606.ENSP00000232003,9606.ENSP00000233242,9606.ENSP00000253382,9606.ENSP00000260356,9606.ENSP00000261772,9606.ENSP00000263025,9606.ENSP00000264187,9606.ENSP00000265131,9606.ENSP00000273283,9606.ENSP00000277903,…	PPP5C,APOH,TGFBR3,SERPIND1,TUBB1,LBP,COMP,PCOLCE,VTN,HRG,APOB,ACSS2,THBS1,AARS1,MAPK3,NID1,TNC,ITIH1,HABP2,APP,FCN2,PKDCC,CAMP,MAP2K1,HSPA4,TWF2,F2,EFEMP2,OXSR1,LTBP4,STAB1,GNAI2,PAK2,SPOCK2,EHD3,SERPINA5,ANG,UBA1,PKLR,RPL22,DNM3,DYNC1H1,GFPT1,ITIH2,CFH,THBS3,FCN1,COL5A1,PGK1,RPS6KA3,POSTN,PFKP,STAB2,GARS1,XRCC5,GNE,NSF,PAICS,RAB1A,GSPT1,PRNP,CPS1,TNXB,PTPRC,PIK3CG,GMPS,ADK,ATP1A3,GALK2,TTN,PTPRS…
GO Function	GO:1901681	Sulfur compound binding	24	272	0.8	9.03e-10	9606.ENSP00000205948,9606.ENSP00000212355,9606.ENSP00000215727,9606.ENSP00000222271,9606.ENSP00000223061,9606.ENSP00000226218,9606.ENSP00000232003,9606.ENSP00000233242,9606.ENSP00000260356,9606.ENSP00000284981,9606.ENSP00000308541,9606.ENSP00000309953,9606.ENSP00000333203,9606.ENSP00000336762,9606.ENSP00000346088,9606.ENSP00000356399,9606.ENSP00000357362,9606.ENSP00000360882,9606.ENSP00000369071,…	APOH,TGFBR3,SERPIND1,COMP,PCOLCE,VTN,HRG,APOB,THBS1,APP,F2,EFEMP2,SERPINA5,ANG,RPL22,CFH,THBS3,COL5A1,POSTN,TKT,TNXB,PTPRC,PTPRS,KNG1
GO Function	GO:0043394	Proteoglycan binding	11	37	1.33	9.92e-09	9606.ENSP00000222271,9606.ENSP00000232003,9606.ENSP00000260356,9606.ENSP00000264187,9606.ENSP00000265131,9606.ENSP00000284981,9606.ENSP00000291744,9606.ENSP00000356399,9606.ENSP00000360882,9606.ENSP00000411355,9606.ENSP00000467537	COMP,HRG,THBS1,NID1,TNC,APP,FCN2,CFH,COL5A1,PTPRC,PTPRS
GO Function	GO:0005178	Integrin binding	17	159	0.89	8.7e-08	9606.ENSP00000222271,9606.ENSP00000222399,9606.ENSP00000226218,9606.ENSP00000260356,9606.ENSP00000261405,9606.ENSP00000262407,9606.ENSP00000279227,9606.ENSP00000284981,9606.ENSP00000311905,9606.ENSP00000316029,9606.ENSP00000320866,9606.ENSP00000360882,9606.ENSP00000363827,9606.ENSP00000379140,9606.ENSP00000381581,9606.ENSP00000407685,9606.ENSP00000452786	COMP,LAMB1,VTN,THBS1,VWF,ITGA2B,FERMT3,APP,LTBP4,TLN1,CALR,COL5A1,HSPG2,CXCL12,LCP1,TNXB,ITGB3
GO Function	GO:0004867	Serine-type endopeptidase inhibitor activity	14	98	1.01	1.02e-07	9606.ENSP00000215727,9606.ENSP00000232003,9606.ENSP00000273283,9606.ENSP00000284981,9606.ENSP00000295550,9606.ENSP00000323929,9606.ENSP00000333203,9606.ENSP00000342850,9606.ENSP00000351190,9606.ENSP00000355627,9606.ENSP00000372218,9606.ENSP00000372221,9606.ENSP00000416066,9606.ENSP00000450540	SERPIND1,HRG,ITIH1,APP,COL6A3,A2M,SERPINA5,SERPINA6,ITIH2,AGT,SERPINB12,SERPINB5,SERPINA1,SERPINA3
GO Function	GO:0005518	Collagen binding	12	66	1.12	1.49e-07	9606.ENSP00000222271,9606.ENSP00000223061,9606.ENSP00000223357,9606.ENSP00000226218,9606.ENSP00000260356,9606.ENSP00000261405,9606.ENSP00000264187,9606.ENSP00000266718,9606.ENSP00000297848,9606.ENSP00000300527,9606.ENSP00000355180,9606.ENSP00000407685	COMP,PCOLCE,AEBP1,VTN,THBS1,VWF,NID1,LUM,COL14A1,COL6A2,COL6A1,TNXB
GO Function	GO:0042802	Identical protein binding	66	2144	0.35	1.49e-07	9606.ENSP00000012443,9606.ENSP00000205948,9606.ENSP00000222381,9606.ENSP00000226218,9606.ENSP00000236850,9606.ENSP00000241052,9606.ENSP00000252590,9606.ENSP00000255040,9606.ENSP00000258201,9606.ENSP00000260356,9606.ENSP00000261405,9606.ENSP00000262407,9606.ENSP00000262418,9606.ENSP00000262746,9606.ENSP00000263025,9606.ENSP00000263388,9606.ENSP00000271638,9606.ENSP00000284981,9606.ENSP00000286713,…	PPP5C,APOH,PON1,VTN,APOA1,CAT,PLVAP,APCS,FHOD1,THBS1,VWF,ITGA2B,SLC4A1,PRDX1,MAPK3,NOTCH3,S100A11,APP,STOM,APPL1,FCN2,PRDX3,HOOK3,EFEMP2,OXSR1,C1QB,PAK2,BIN1,NCL,HMGCS1,A2M,FLNC,ANG,CORO1B,RPL22,DNM3,COL18A1,CFH,LMNA,ADAMTSL4,PSAT1,AHNAK,PFKP,C1QTNF3,GARS1,PDCD10,GAPDH,PAICS,TKT,PRNP,SERPINA1,PIK3CG,FLNB,C1R,LDHA,VIM,ITGB3,APOC2,TTN,UPP2,PSMC3,HNRNPU,ENO1,NOTCH1,SNX6,AMPD2
GO Function	GO:0008289	Lipid binding	34	796	0.49	2.63e-06	9606.ENSP00000012443,9606.ENSP00000200676,9606.ENSP00000205948,9606.ENSP00000217407,9606.ENSP00000222381,9606.ENSP00000225655,9606.ENSP00000226355,9606.ENSP00000227667,9606.ENSP00000233242,9606.ENSP00000236850,9606.ENSP00000253354,9606.ENSP00000260356,9606.ENSP00000268182,9606.ENSP00000288266,9606.ENSP00000296435,9606.ENSP00000303908,9606.ENSP00000308541,9606.ENSP00000316029,9606.ENSP00000316779,…	PPP5C,CETP,APOH,LBP,PON1,PFN1,AFM,APOC3,APOB,APOA1,BPIFB1,THBS1,IQGAP1,APPL1,CAMP,TWF2,F2,TLN1,BIN1,APOL1,SERPINA5,SERPINA6,SPTBN1,C8G,F10,ANXA1,APOF,PLA2G2A,CPS1,PLTP,GC,ATP1A3,APOC2,SNX6
GO Function	GO:0005200	Structural constituent of cytoskeleton	12	107	0.91	1.78e-05	9606.ENSP00000167586,9606.ENSP00000217133,9606.ENSP00000252242,9606.ENSP00000310861,9606.ENSP00000316029,9606.ENSP00000349259,9606.ENSP00000355124,9606.ENSP00000357283,9606.ENSP00000369129,9606.ENSP00000369317,9606.ENSP00000446007,9606.ENSP00000487444	KRT14,TUBB1,KRT5,KRT2,TLN1,SPTBN1,KRT19,LMNA,DSP,KRT6A,VIM,SPTAN1
GO Function	GO:0043169	Cation binding	99	4335	0.22	1.78e-05	9606.ENSP00000012443,9606.ENSP00000200676,9606.ENSP00000207549,9606.ENSP00000218099,9606.ENSP00000222271,9606.ENSP00000222381,9606.ENSP00000223357,9606.ENSP00000226355,9606.ENSP00000229268,9606.ENSP00000232003,9606.ENSP00000236850,9606.ENSP00000241052,9606.ENSP00000244137,9606.ENSP00000247461,9606.ENSP00000252804,9606.ENSP00000253382,9606.ENSP00000253496,9606.ENSP00000254898,9606.ENSP00000255040,…	PPP5C,CETP,UNC13D,F9,COMP,PON1,AEBP1,AFM,USP5,HRG,APOA1,CAT,PEPD,CANX,PXDN,ACSS2,F12,MATN2,APCS,NOTCH2,DSG1,THBS1,AARS1,ITGA2B,NOTCH3,NID1,CP,HPX,IQGAP1,CDH11,S100A11,ITIH1,HABP2,MYL9,APP,KPNB1,FCN2,C2,NPTX1,F2,SNED1,EFEMP2,OXSR1,LTBP4,STAB1,GNAI2,CALR,SPOCK2,EHD3,MGAT1,SERPINA5,ANG,PKLR,CACNA2D1,CNDP1,COL18A1,THBS3,EPS15,FCN1,COL5A1,MATN4,MATN1,SVEP1,HSPG2,F10,ANXA1,CLSTN1,RPS6KA3,POSTN,PFKP,FLG…
GO Function	GO:0030234	Enzyme regulator activity	42	1239	0.39	2.33e-05	9606.ENSP00000205948,9606.ENSP00000215727,9606.ENSP00000223061,9606.ENSP00000223642,9606.ENSP00000227667,9606.ENSP00000232003,9606.ENSP00000236850,9606.ENSP00000245907,9606.ENSP00000265462,9606.ENSP00000268182,9606.ENSP00000273283,9606.ENSP00000284981,9606.ENSP00000295550,9606.ENSP00000298510,9606.ENSP00000302486,9606.ENSP00000309474,9606.ENSP00000314067,9606.ENSP00000316779,9606.ENSP00000319464,…	APOH,SERPIND1,PCOLCE,C5,APOC3,HRG,APOA1,C3,PRDX5,IQGAP1,ITIH1,APP,COL6A3,PRDX3,MAP2K1,PSMD1,PAK2,BIN1,CPN2,SPOCK2,A2M,SERPINA5,SERPINA6,ITIH2,AGT,ANXA1,RPS6KA3,IPO7,SERPINB12,SERPINB5,XRCC5,PROS1,GAPDH,PSMD14,PPP1R12A,PRNP,C4B,SERPINA1,SERPINA3,APOC2,KNG1,NOTCH1
GO Function	GO:0001848	Complement binding	7	26	1.29	4.7e-05	9606.ENSP00000255040,9606.ENSP00000320866,9606.ENSP00000354458,9606.ENSP00000356399,9606.ENSP00000360697,9606.ENSP00000415941,9606.ENSP00000416561	APCS,CALR,C8A,CFH,C8G,C4B,CFB
GO Function	GO:0043167	Ion binding	124	6033	0.17	5.27e-05	9606.ENSP00000012443,9606.ENSP00000200676,9606.ENSP00000207549,9606.ENSP00000217133,9606.ENSP00000218099,9606.ENSP00000222271,9606.ENSP00000222381,9606.ENSP00000223357,9606.ENSP00000225655,9606.ENSP00000226355,9606.ENSP00000229268,9606.ENSP00000232003,9606.ENSP00000236850,9606.ENSP00000241052,9606.ENSP00000244137,9606.ENSP00000247461,9606.ENSP00000252804,9606.ENSP00000253382,9606.ENSP00000253496,…	PPP5C,CETP,UNC13D,TUBB1,F9,COMP,PON1,AEBP1,PFN1,AFM,USP5,HRG,APOA1,CAT,PEPD,CANX,PXDN,ACSS2,F12,MATN2,APCS,NOTCH2,DSG1,THBS1,AARS1,ITGA2B,MAPK3,NOTCH3,NID1,CP,HPX,IQGAP1,CDH11,S100A11,ITIH1,HABP2,MYL9,APP,KPNB1,FCN2,PKDCC,C2,MAP2K1,HSPA4,TWF2,NPTX1,F2,SNED1,EFEMP2,OXSR1,LTBP4,STAB1,GNAI2,PAK2,CALR,SPOCK2,EHD3,MGAT1,SERPINA5,ANG,UBA1,PKLR,DNM3,DYNC1H1,CACNA2D1,CNDP1,COL18A1,THBS3,EPS15,FCN1,COL5A1…
GO Function	GO:0070325	Lipoprotein particle receptor binding	7	30	1.22	0.0001	9606.ENSP00000227667,9606.ENSP00000233242,9606.ENSP00000236850,9606.ENSP00000284981,9606.ENSP00000315130,9606.ENSP00000363827,9606.ENSP00000392423	APOC3,APOB,APOA1,APP,CLU,HSPG2,RELN
GO Function	GO:0051015	Actin filament binding	15	213	0.7	0.0001	9606.ENSP00000258201,9606.ENSP00000268182,9606.ENSP00000303908,9606.ENSP00000316029,9606.ENSP00000316779,9606.ENSP00000327145,9606.ENSP00000340211,9606.ENSP00000349259,9606.ENSP00000371798,9606.ENSP00000381581,9606.ENSP00000387261,9606.ENSP00000394496,9606.ENSP00000420213,9606.ENSP00000467141,9606.ENSP00000487444	FHOD1,IQGAP1,TWF2,TLN1,BIN1,FLNC,CORO1B,SPTBN1,FSCN1,LCP1,PSTPIP2,CORO1C,FLNB,TTN,SPTAN1
GO Function	GO:0019899	Enzyme binding	57	2084	0.29	0.0001	9606.ENSP00000207549,9606.ENSP00000222271,9606.ENSP00000225655,9606.ENSP00000233242,9606.ENSP00000236850,9606.ENSP00000241052,9606.ENSP00000256646,9606.ENSP00000261405,9606.ENSP00000262306,9606.ENSP00000263025,9606.ENSP00000263388,9606.ENSP00000268182,9606.ENSP00000284981,9606.ENSP00000286713,9606.ENSP00000288266,9606.ENSP00000290158,9606.ENSP00000298510,9606.ENSP00000303908,9606.ENSP00000309474,…	UNC13D,COMP,PFN1,APOB,APOA1,CAT,NOTCH2,VWF,ELOB,MAPK3,NOTCH3,IQGAP1,APP,STOM,APPL1,KPNB1,PRDX3,TWF2,PSMD1,OXSR1,PAK2,CLU,BIN1,NCL,CALR,A2M,SERPINA5,DNM3,SPTBN1,NAE1,PCBP2,DCTN1,ATP1B1,ADAMTSL4,RPS6KA3,IPO7,DSP,SERPINB12,XRCC5,PDCD10,CARHSP1,NSF,LCP1,CUL4B,PPP1R12A,CORO1C,PRNP,PTPRC,SERPINA1,OTUB1,ITGB3,APOC2,TTN,PTPN11,HNRNPU,ENO1,NOTCH1
GO Function	GO:0043395	Heparan sulfate proteoglycan binding	6	19	1.36	0.00013	9606.ENSP00000222271,9606.ENSP00000232003,9606.ENSP00000284981,9606.ENSP00000356399,9606.ENSP00000411355,9606.ENSP00000467537	COMP,HRG,APP,CFH,PTPRC,PTPRS
GO Function	GO:0046872	Metal ion binding	94	4250	0.2	0.00015	9606.ENSP00000012443,9606.ENSP00000207549,9606.ENSP00000218099,9606.ENSP00000222271,9606.ENSP00000222381,9606.ENSP00000223357,9606.ENSP00000226355,9606.ENSP00000229268,9606.ENSP00000232003,9606.ENSP00000241052,9606.ENSP00000244137,9606.ENSP00000247461,9606.ENSP00000252804,9606.ENSP00000253496,9606.ENSP00000254898,9606.ENSP00000255040,9606.ENSP00000256646,9606.ENSP00000257192,9606.ENSP00000260356,…	PPP5C,UNC13D,F9,COMP,PON1,AEBP1,AFM,USP5,HRG,CAT,PEPD,CANX,PXDN,F12,MATN2,APCS,NOTCH2,DSG1,THBS1,AARS1,ITGA2B,NOTCH3,NID1,CP,HPX,IQGAP1,CDH11,S100A11,ITIH1,HABP2,MYL9,APP,KPNB1,FCN2,C2,NPTX1,F2,SNED1,EFEMP2,OXSR1,LTBP4,STAB1,GNAI2,CALR,SPOCK2,EHD3,MGAT1,ANG,PKLR,CACNA2D1,CNDP1,COL18A1,THBS3,EPS15,FCN1,COL5A1,MATN4,MATN1,SVEP1,HSPG2,F10,ANXA1,CLSTN1,RPS6KA3,POSTN,PFKP,FLG2,STAB2,PROS1,EFEMP1,GNE,N…
GO Function	GO:0030280	Structural constituent of skin epidermis	7	37	1.13	0.0003	9606.ENSP00000252242,9606.ENSP00000252244,9606.ENSP00000269576,9606.ENSP00000310861,9606.ENSP00000329243,9606.ENSP00000342710,9606.ENSP00000369317	KRT5,KRT1,KRT10,KRT2,KRT7,KRT77,KRT6A
GO Function	GO:0008092	Cytoskeletal protein binding	34	1002	0.39	0.00031	9606.ENSP00000012443,9606.ENSP00000225655,9606.ENSP00000258201,9606.ENSP00000262418,9606.ENSP00000263710,9606.ENSP00000268182,9606.ENSP00000279022,9606.ENSP00000288266,9606.ENSP00000303908,9606.ENSP00000305699,9606.ENSP00000310861,9606.ENSP00000315130,9606.ENSP00000316029,9606.ENSP00000316779,9606.ENSP00000327145,9606.ENSP00000336762,9606.ENSP00000340211,9606.ENSP00000347457,9606.ENSP00000349259,…	PPP5C,PFN1,FHOD1,SLC4A1,CLASP1,IQGAP1,MYL9,APPL1,TWF2,HOOK3,KRT2,CLU,TLN1,BIN1,FLNC,ANG,CORO1B,DNM3,SPTBN1,DCTN1,CLSTN1,FSCN1,GAPDH,LCP1,PSTPIP2,CORO1C,PRNP,PTPRC,FLNB,GC,TTN,SPTAN1,HNRNPU,SNX6
GO Function	GO:0050840	Extracellular matrix binding	8	56	1.01	0.00033	9606.ENSP00000226218,9606.ENSP00000252804,9606.ENSP00000260356,9606.ENSP00000262407,9606.ENSP00000264187,9606.ENSP00000321108,9606.ENSP00000374274,9606.ENSP00000452786	VTN,PXDN,THBS1,ITGA2B,NID1,SPOCK2,SSC5D,ITGB3
GO Function	GO:0098772	Molecular function regulator activity	53	1960	0.29	0.00033	9606.ENSP00000205948,9606.ENSP00000215727,9606.ENSP00000223061,9606.ENSP00000223642,9606.ENSP00000225655,9606.ENSP00000227667,9606.ENSP00000230036,9606.ENSP00000232003,9606.ENSP00000236850,9606.ENSP00000245907,9606.ENSP00000252804,9606.ENSP00000265462,9606.ENSP00000268182,9606.ENSP00000273283,9606.ENSP00000284981,9606.ENSP00000295550,9606.ENSP00000298510,9606.ENSP00000302486,9606.ENSP00000308541,…	APOH,SERPIND1,PCOLCE,C5,PFN1,APOC3,GPLD1,HRG,APOA1,C3,PXDN,PRDX5,IQGAP1,ITIH1,APP,COL6A3,PRDX3,MAP2K1,F2,PSMD1,PAK2,BIN1,CPN2,SPOCK2,A2M,SERPINA5,SERPINA6,ITIH2,AGT,ATP1B1,ANXA1,RPS6KA3,IPO7,SERPINB12,SERPINB5,XRCC5,PROS1,EFEMP1,CXCL12,GAPDH,PSMD14,RAB1A,PPP1R12A,PRNP,C4B,SERPINA1,FBN2,SERPINA3,APOC2,CCL14,CCL18,KNG1,NOTCH1
GO Function	GO:0005543	Phospholipid binding	21	464	0.51	0.00049	9606.ENSP00000200676,9606.ENSP00000205948,9606.ENSP00000222381,9606.ENSP00000225655,9606.ENSP00000227667,9606.ENSP00000233242,9606.ENSP00000236850,9606.ENSP00000260356,9606.ENSP00000268182,9606.ENSP00000288266,9606.ENSP00000303908,9606.ENSP00000316029,9606.ENSP00000316779,9606.ENSP00000333203,9606.ENSP00000349259,9606.ENSP00000364709,9606.ENSP00000366109,9606.ENSP00000383364,9606.ENSP00000402608,…	CETP,APOH,PON1,PFN1,APOC3,APOB,APOA1,THBS1,IQGAP1,APPL1,TWF2,TLN1,BIN1,SERPINA5,SPTBN1,F10,ANXA1,PLA2G2A,CPS1,PLTP,SNX6
GO Function	GO:0030020	Extracellular matrix structural constituent conferring tensile strength	6	28	1.19	0.00076	9606.ENSP00000295550,9606.ENSP00000297848,9606.ENSP00000300527,9606.ENSP00000325146,9606.ENSP00000355180,9606.ENSP00000360882	COL6A3,COL14A1,COL6A2,COL12A1,COL6A1,COL5A1
GO Function	GO:0008379	Thioredoxin peroxidase activity	4	7	1.61	0.0013	9606.ENSP00000262746,9606.ENSP00000265462,9606.ENSP00000298510,9606.ENSP00000301522	PRDX1,PRDX5,PRDX3,PRDX2
GO Function	GO:0003779	Actin binding	19	448	0.48	0.003	9606.ENSP00000225655,9606.ENSP00000258201,9606.ENSP00000268182,9606.ENSP00000303908,9606.ENSP00000316029,9606.ENSP00000316779,9606.ENSP00000327145,9606.ENSP00000336762,9606.ENSP00000340211,9606.ENSP00000349259,9606.ENSP00000371798,9606.ENSP00000381581,9606.ENSP00000387261,9606.ENSP00000394496,9606.ENSP00000420213,9606.ENSP00000421725,9606.ENSP00000467141,9606.ENSP00000487444,9606.ENSP00000491215	PFN1,FHOD1,IQGAP1,TWF2,TLN1,BIN1,FLNC,ANG,CORO1B,SPTBN1,FSCN1,LCP1,PSTPIP2,CORO1C,FLNB,GC,TTN,SPTAN1,HNRNPU
GO Function	GO:0002020	Protease binding	10	135	0.73	0.0036	9606.ENSP00000222271,9606.ENSP00000261405,9606.ENSP00000316779,9606.ENSP00000323929,9606.ENSP00000333203,9606.ENSP00000358035,9606.ENSP00000399376,9606.ENSP00000416066,9606.ENSP00000452786,9606.ENSP00000467141	COMP,VWF,BIN1,A2M,SERPINA5,ADAMTSL4,PRNP,SERPINA1,ITGB3,TTN
GO Function	GO:0004601	Peroxidase activity	6	41	1.02	0.0046	9606.ENSP00000241052,9606.ENSP00000252804,9606.ENSP00000262746,9606.ENSP00000265462,9606.ENSP00000298510,9606.ENSP00000301522	CAT,PXDN,PRDX1,PRDX5,PRDX3,PRDX2
GO Function	GO:0071813	Lipoprotein particle binding	5	28	1.11	0.0085	9606.ENSP00000236850,9606.ENSP00000260356,9606.ENSP00000312946,9606.ENSP00000373539,9606.ENSP00000417138	APOA1,THBS1,STAB1,STAB2,PLTP
GO Function	GO:0005044	Scavenger receptor activity	6	48	0.95	0.0094	9606.ENSP00000226218,9606.ENSP00000262776,9606.ENSP00000312946,9606.ENSP00000330601,9606.ENSP00000373539,9606.ENSP00000374274	VTN,LGALS3BP,STAB1,HHIPL1,STAB2,SSC5D
GO Function	GO:0030169	Low-density lipoprotein particle binding	4	17	1.23	0.017	9606.ENSP00000260356,9606.ENSP00000312946,9606.ENSP00000373539,9606.ENSP00000417138	THBS1,STAB1,STAB2,PLTP
GO Function	GO:0051087	Chaperone binding	8	108	0.73	0.0194	9606.ENSP00000261405,9606.ENSP00000264613,9606.ENSP00000284981,9606.ENSP00000315130,9606.ENSP00000316779,9606.ENSP00000320866,9606.ENSP00000399376,9606.ENSP00000444688	VWF,CP,APP,CLU,BIN1,CALR,PRNP,ATP1A3
GO Function	GO:0030506	Ankyrin binding	4	19	1.18	0.0237	9606.ENSP00000262418,9606.ENSP00000327145,9606.ENSP00000349259,9606.ENSP00000411355	SLC4A1,FLNC,SPTBN1,PTPRC
GO Function	GO:0019828	Aspartic-type endopeptidase inhibitor activity	3	7	1.49	0.0266	9606.ENSP00000316779,9606.ENSP00000380070,9606.ENSP00000399376	BIN1,GAPDH,PRNP
GO Function	GO:0016667	Oxidoreductase activity, acting on a sulfur group of donors	6	60	0.86	0.0266	9606.ENSP00000298510,9606.ENSP00000312946,9606.ENSP00000362413,9606.ENSP00000373539,9606.ENSP00000385385,9606.ENSP00000387654	PRDX3,STAB1,PGK1,STAB2,PDIA6,PCYOX1
GO Function	GO:0050997	Quaternary ammonium group binding	5	39	0.96	0.0295	9606.ENSP00000200676,9606.ENSP00000236850,9606.ENSP00000333203,9606.ENSP00000391481,9606.ENSP00000417138	CETP,APOA1,SERPINA5,TKT,PLTP
GO Function	GO:0097493	Structural molecule activity conferring elasticity	3	8	1.43	0.0342	9606.ENSP00000367263,9606.ENSP00000424571,9606.ENSP00000467141	AHNAK,FBN2,TTN
GO Function	GO:0120020	Cholesterol transfer activity	4	23	1.1	0.041	9606.ENSP00000200676,9606.ENSP00000233242,9606.ENSP00000236850,9606.ENSP00000417138	CETP,APOB,APOA1,PLTP
GO Function	GO:0030492	Hemoglobin binding	3	9	1.38	0.0436	9606.ENSP00000262418,9606.ENSP00000441828,9606.ENSP00000494175	SLC4A1,HPR,HBB
GO Function	GO:0008236	Serine-type peptidase activity	10	194	0.57	0.0448	9606.ENSP00000218099,9606.ENSP00000253496,9606.ENSP00000277903,9606.ENSP00000299367,9606.ENSP00000308541,9606.ENSP00000364709,9606.ENSP00000392423,9606.ENSP00000416561,9606.ENSP00000441828,9606.ENSP00000444271	F9,F12,HABP2,C2,F2,F10,RELN,CFB,HPR,C1R
GO Function	GO:0019838	Growth factor binding	8	127	0.66	0.0452	9606.ENSP00000212355,9606.ENSP00000252804,9606.ENSP00000260356,9606.ENSP00000311905,9606.ENSP00000323929,9606.ENSP00000355180,9606.ENSP00000360882,9606.ENSP00000416683	TGFBR3,PXDN,THBS1,LTBP4,A2M,COL6A1,COL5A1,IGFALS
GO Function	GO:0050750	Low-density lipoprotein particle receptor binding	4	25	1.06	0.0496	9606.ENSP00000233242,9606.ENSP00000284981,9606.ENSP00000315130,9606.ENSP00000363827	APOB,APP,CLU,HSPG2
GO Process	GO:0006950	Response to stress	115	3358	0.39	1.16e-17	9606.ENSP00000012443,9606.ENSP00000205948,9606.ENSP00000207549,9606.ENSP00000212355,9606.ENSP00000215727,9606.ENSP00000217407,9606.ENSP00000218099,9606.ENSP00000222271,9606.ENSP00000223642,9606.ENSP00000232003,9606.ENSP00000241052,9606.ENSP00000245907,9606.ENSP00000246635,9606.ENSP00000247461,9606.ENSP00000252244,9606.ENSP00000252804,9606.ENSP00000253354,9606.ENSP00000253496,9606.ENSP00000255040,…	PPP5C,APOH,UNC13D,TGFBR3,SERPIND1,LBP,F9,COMP,C5,HRG,CAT,C3,KRT13,CANX,KRT1,PXDN,BPIFB1,F12,APCS,NOTCH2,ORM1,THBS1,VWF,SLC4A1,PRDX1,LGALS3BP,MAPK3,C9,TNC,PRDX5,HPX,MYL9,FERMT3,APP,FCN2,CAMP,PRDX3,C2,PRDX2,MAP2K1,LRG1,HSPA4,F2,OXSR1,STAB1,C1QB,CLU,TLN1,APOL1,CALR,C7,A2M,ANG,UBA1,PKLR,CORO1B,PCBP2,C8A,FH,AGT,CFH,NIBAN1,ATP1B1,LMNA,C8B,C8G,FCN1,COL5A1,PGK1,C1QC,HSPG2,ATF6B,F10,ANXA1,RPS6KA3,IPO7,DSP…
GO Process	GO:0006959	Humoral immune response	33	268	0.95	1.77e-16	9606.ENSP00000223642,9606.ENSP00000232003,9606.ENSP00000245907,9606.ENSP00000252244,9606.ENSP00000256646,9606.ENSP00000263408,9606.ENSP00000284981,9606.ENSP00000291744,9606.ENSP00000296435,9606.ENSP00000299367,9606.ENSP00000308541,9606.ENSP00000313967,9606.ENSP00000315130,9606.ENSP00000322061,9606.ENSP00000336762,9606.ENSP00000354458,9606.ENSP00000356399,9606.ENSP00000360281,9606.ENSP00000360697,…	C5,HRG,C3,KRT1,NOTCH2,C9,APP,FCN2,CAMP,C2,F2,C1QB,CLU,C7,ANG,C8A,CFH,C8B,C8G,FCN1,C1QC,KRT6A,CXCL12,GAPDH,TF,C4B,CFB,C1R,IGHD,CCL18,IGHV3-72,KNG1,NOTCH1
GO Process	GO:0006956	Complement activation	20	60	1.38	2.46e-16	9606.ENSP00000223642,9606.ENSP00000245907,9606.ENSP00000252244,9606.ENSP00000263408,9606.ENSP00000291744,9606.ENSP00000299367,9606.ENSP00000313967,9606.ENSP00000315130,9606.ENSP00000322061,9606.ENSP00000354458,9606.ENSP00000356399,9606.ENSP00000360281,9606.ENSP00000360697,9606.ENSP00000360871,9606.ENSP00000363770,9606.ENSP00000415941,9606.ENSP00000416561,9606.ENSP00000444271,9606.ENSP00000478893,…	C5,C3,KRT1,C9,FCN2,C2,C1QB,CLU,C7,C8A,CFH,C8B,C8G,FCN1,C1QC,C4B,CFB,C1R,IGHD,IGHV3-72
GO Process	GO:0098542	Defense response to other organism	57	989	0.62	5.56e-16	9606.ENSP00000207549,9606.ENSP00000217407,9606.ENSP00000223642,9606.ENSP00000232003,9606.ENSP00000245907,9606.ENSP00000252244,9606.ENSP00000253354,9606.ENSP00000253496,9606.ENSP00000255040,9606.ENSP00000256646,9606.ENSP00000262746,9606.ENSP00000263025,9606.ENSP00000263408,9606.ENSP00000265983,9606.ENSP00000284981,9606.ENSP00000291744,9606.ENSP00000296435,9606.ENSP00000299367,9606.ENSP00000308541,…	UNC13D,LBP,C5,HRG,C3,KRT1,BPIFB1,F12,APCS,NOTCH2,PRDX1,MAPK3,C9,HPX,APP,FCN2,CAMP,C2,F2,STAB1,C1QB,CLU,APOL1,C7,ANG,PCBP2,C8A,CFH,ATP1B1,C8B,C8G,FCN1,C1QC,ANXA1,IPO7,KRT6A,STAB2,SSC5D,XRCC5,CXCL12,GAPDH,RNASE1,PLA2G2A,TF,RAB1A,PTPRC,C4B,CFB,PIK3CG,FLNB,C1R,VIM,IGHD,CCL14,CCL18,IGHV3-72,KNG1
GO Process	GO:0006952	Defense response	68	1394	0.54	5.56e-16	9606.ENSP00000207549,9606.ENSP00000217407,9606.ENSP00000223642,9606.ENSP00000232003,9606.ENSP00000245907,9606.ENSP00000252244,9606.ENSP00000253354,9606.ENSP00000253496,9606.ENSP00000255040,9606.ENSP00000256646,9606.ENSP00000259396,9606.ENSP00000260356,9606.ENSP00000262746,9606.ENSP00000262776,9606.ENSP00000263025,9606.ENSP00000263408,9606.ENSP00000265462,9606.ENSP00000265983,9606.ENSP00000284981,…	UNC13D,LBP,C5,HRG,C3,KRT1,BPIFB1,F12,APCS,NOTCH2,ORM1,THBS1,PRDX1,LGALS3BP,MAPK3,C9,PRDX5,HPX,APP,FCN2,CAMP,C2,PRDX2,F2,STAB1,C1QB,CLU,APOL1,C7,A2M,ANG,PCBP2,C8A,CFH,ATP1B1,C8B,C8G,FCN1,C1QC,HSPG2,ANXA1,IPO7,KRT6A,STAB2,SSC5D,XRCC5,CXCL12,GAPDH,RNASE1,PLA2G2A,TF,RAB1A,PTPRC,C4B,SERPINA1,CFB,PIK3CG,FLNB,HPR,C1R,VIM,SERPINA3,IGHD,CCL14,CCL18,IGHV3-72,KNG1,NOTCH1
GO Process	GO:0051707	Response to other organism	66	1328	0.55	5.8e-16	9606.ENSP00000207549,9606.ENSP00000217407,9606.ENSP00000223642,9606.ENSP00000232003,9606.ENSP00000233242,9606.ENSP00000245907,9606.ENSP00000252244,9606.ENSP00000253354,9606.ENSP00000253496,9606.ENSP00000255040,9606.ENSP00000256646,9606.ENSP00000262746,9606.ENSP00000263025,9606.ENSP00000263408,9606.ENSP00000265983,9606.ENSP00000284981,9606.ENSP00000291744,9606.ENSP00000296435,9606.ENSP00000298510,…	UNC13D,LBP,C5,HRG,APOB,C3,KRT1,BPIFB1,F12,APCS,NOTCH2,PRDX1,MAPK3,C9,HPX,APP,FCN2,CAMP,PRDX3,C2,PRDX2,LRG1,F2,STAB1,C1QB,CLU,APOL1,CALR,C7,ANG,PCBP2,C8A,CFH,ATP1B1,C8B,C8G,FCN1,C1QC,ANXA1,RPS6KA3,IPO7,KRT6A,STAB2,SSC5D,XRCC5,CXCL12,GAPDH,RNASE1,PLA2G2A,TF,RAB1A,CPS1,PTPRC,C4B,CFB,PIK3CG,FLNB,C1R,VIM,IGHD,CCL14,CCL18,IGHV3-72,KNG1,ENO1,NOTCH1
GO Process	GO:0009607	Response to biotic stimulus	67	1375	0.54	5.8e-16	9606.ENSP00000207549,9606.ENSP00000217407,9606.ENSP00000223642,9606.ENSP00000232003,9606.ENSP00000233242,9606.ENSP00000245907,9606.ENSP00000252244,9606.ENSP00000253354,9606.ENSP00000253496,9606.ENSP00000255040,9606.ENSP00000256646,9606.ENSP00000262746,9606.ENSP00000263025,9606.ENSP00000263408,9606.ENSP00000265983,9606.ENSP00000284981,9606.ENSP00000291744,9606.ENSP00000296435,9606.ENSP00000298510,…	UNC13D,LBP,C5,HRG,APOB,C3,KRT1,BPIFB1,F12,APCS,NOTCH2,PRDX1,MAPK3,C9,HPX,APP,FCN2,CAMP,PRDX3,C2,PRDX2,LRG1,F2,STAB1,C1QB,PAK2,CLU,APOL1,CALR,C7,ANG,PCBP2,C8A,CFH,ATP1B1,C8B,C8G,FCN1,C1QC,ANXA1,RPS6KA3,IPO7,KRT6A,STAB2,SSC5D,XRCC5,CXCL12,GAPDH,RNASE1,PLA2G2A,TF,RAB1A,CPS1,PTPRC,C4B,CFB,PIK3CG,FLNB,C1R,VIM,IGHD,CCL14,CCL18,IGHV3-72,KNG1,ENO1,NOTCH1
GO Process	GO:0044419	Biological process involved in interspecies interaction between organisms	70	1490	0.53	5.8e-16	9606.ENSP00000207549,9606.ENSP00000217407,9606.ENSP00000223642,9606.ENSP00000232003,9606.ENSP00000233242,9606.ENSP00000245907,9606.ENSP00000252244,9606.ENSP00000253354,9606.ENSP00000253496,9606.ENSP00000255040,9606.ENSP00000256646,9606.ENSP00000262746,9606.ENSP00000263025,9606.ENSP00000263408,9606.ENSP00000265983,9606.ENSP00000284981,9606.ENSP00000286713,9606.ENSP00000291744,9606.ENSP00000296435,…	UNC13D,LBP,C5,HRG,APOB,C3,KRT1,BPIFB1,F12,APCS,NOTCH2,PRDX1,MAPK3,C9,HPX,APP,STOM,FCN2,CAMP,PRDX3,C2,PRDX2,LRG1,F2,STAB1,C1QB,CLU,APOL1,CALR,C7,ANG,PCBP2,C8A,CFH,ATP1B1,C8B,C8G,EPS15,FCN1,C1QC,ANXA1,RPS6KA3,IPO7,KRT6A,STAB2,SSC5D,XRCC5,CXCL12,GAPDH,RNASE1,PLA2G2A,TF,RAB1A,CPS1,PTPRC,C4B,CFB,PIK3CG,FLNB,C1R,VIM,ITGB3,IGHD,CCL14,CCL18,IGHV3-72,PSMC3,KNG1,ENO1,NOTCH1
GO Process	GO:0051346	Negative regulation of hydrolase activity	34	354	0.84	1.07e-14	9606.ENSP00000215727,9606.ENSP00000223642,9606.ENSP00000226218,9606.ENSP00000227667,9606.ENSP00000232003,9606.ENSP00000236850,9606.ENSP00000245907,9606.ENSP00000255040,9606.ENSP00000260356,9606.ENSP00000265462,9606.ENSP00000273283,9606.ENSP00000284981,9606.ENSP00000295550,9606.ENSP00000298510,9606.ENSP00000312999,9606.ENSP00000314067,9606.ENSP00000316779,9606.ENSP00000321108,9606.ENSP00000323929,…	SERPIND1,C5,VTN,APOC3,HRG,APOA1,C3,APCS,THBS1,PRDX5,ITIH1,APP,COL6A3,PRDX3,GNAI2,PAK2,BIN1,SPOCK2,A2M,SERPINA5,SERPINA6,ITIH2,AGT,ANXA1,RPS6KA3,SERPINB12,SERPINB5,PROS1,GAPDH,PRNP,C4B,SERPINA1,SERPINA3,KNG1
GO Process	GO:0010951	Negative regulation of endopeptidase activity	29	240	0.94	1.16e-14	9606.ENSP00000215727,9606.ENSP00000223642,9606.ENSP00000226218,9606.ENSP00000232003,9606.ENSP00000245907,9606.ENSP00000260356,9606.ENSP00000265462,9606.ENSP00000273283,9606.ENSP00000284981,9606.ENSP00000295550,9606.ENSP00000298510,9606.ENSP00000314067,9606.ENSP00000316779,9606.ENSP00000321108,9606.ENSP00000323929,9606.ENSP00000333203,9606.ENSP00000342850,9606.ENSP00000351190,9606.ENSP00000355627,…	SERPIND1,C5,VTN,HRG,C3,THBS1,PRDX5,ITIH1,APP,COL6A3,PRDX3,PAK2,BIN1,SPOCK2,A2M,SERPINA5,SERPINA6,ITIH2,AGT,RPS6KA3,SERPINB12,SERPINB5,PROS1,GAPDH,PRNP,C4B,SERPINA1,SERPINA3,KNG1
GO Process	GO:0007155	Cell adhesion	53	965	0.6	3.47e-14	9606.ENSP00000222271,9606.ENSP00000222399,9606.ENSP00000226218,9606.ENSP00000252804,9606.ENSP00000257192,9606.ENSP00000258341,9606.ENSP00000260356,9606.ENSP00000261405,9606.ENSP00000262407,9606.ENSP00000262776,9606.ENSP00000264187,9606.ENSP00000265131,9606.ENSP00000268603,9606.ENSP00000271638,9606.ENSP00000277903,9606.ENSP00000279022,9606.ENSP00000279227,9606.ENSP00000284981,9606.ENSP00000292401,…	COMP,LAMB1,VTN,PXDN,DSG1,LAMC1,THBS1,VWF,ITGA2B,LGALS3BP,NID1,TNC,CDH11,S100A11,HABP2,MYL9,FERMT3,APP,AZGP1,COL6A3,COL14A1,COL6A2,LRG1,SNED1,STAB1,TLN1,IGDCC4,COL12A1,COL18A1,COL6A1,ATP1B1,THBS3,COL5A1,SVEP1,ANXA1,CLSTN1,POSTN,DSP,PTPRD,FLG2,KRT18,STAB2,CXCL12,GNE,RAB1A,RELN,TNXB,PTPRC,IGFALS,PIK3CG,ITGB3,PTPRS,HBB
GO Process	GO:0009605	Response to external stimulus	84	2355	0.41	3.53e-13	9606.ENSP00000207549,9606.ENSP00000215727,9606.ENSP00000217407,9606.ENSP00000222381,9606.ENSP00000223642,9606.ENSP00000232003,9606.ENSP00000233242,9606.ENSP00000236850,9606.ENSP00000241052,9606.ENSP00000245907,9606.ENSP00000252242,9606.ENSP00000252244,9606.ENSP00000253354,9606.ENSP00000253496,9606.ENSP00000255040,9606.ENSP00000256646,9606.ENSP00000260356,9606.ENSP00000262746,9606.ENSP00000263025,…	UNC13D,SERPIND1,LBP,PON1,C5,HRG,APOB,APOA1,CAT,C3,KRT5,KRT1,BPIFB1,F12,APCS,NOTCH2,THBS1,PRDX1,MAPK3,NOTCH3,C9,HPX,APP,FCN2,CAMP,PRDX3,C2,PRDX2,MAP2K1,LRG1,F2,STAB1,GNAI2,C1QB,CLU,APOL1,CALR,C7,A2M,ANG,PKLR,CORO1B,PCBP2,C8A,AGT,CFH,ATP1B1,C8B,C8G,FCN1,NIBAN2,C1QC,ANXA1,RPS6KA3,IPO7,POSTN,KRT6A,STAB2,SSC5D,XRCC5,CXCL12,GAPDH,RNASE1,PLA2G2A,TF,RAB1A,RELN,CPS1,PTPRC,C4B,CFB,PIK3CG,FLNB,C1R,VIM,ITGB3…
GO Process	GO:0006958	Complement activation, classical pathway	15	40	1.43	5.95e-13	9606.ENSP00000223642,9606.ENSP00000245907,9606.ENSP00000263408,9606.ENSP00000299367,9606.ENSP00000313967,9606.ENSP00000315130,9606.ENSP00000322061,9606.ENSP00000354458,9606.ENSP00000360281,9606.ENSP00000360697,9606.ENSP00000363770,9606.ENSP00000415941,9606.ENSP00000444271,9606.ENSP00000478893,9606.ENSP00000480035	C5,C3,C9,C2,C1QB,CLU,C7,C8A,C8B,C8G,C1QC,C4B,C1R,IGHD,IGHV3-72
GO Process	GO:0045861	Negative regulation of proteolysis	30	339	0.8	4.73e-12	9606.ENSP00000215727,9606.ENSP00000223642,9606.ENSP00000226218,9606.ENSP00000232003,9606.ENSP00000245907,9606.ENSP00000260356,9606.ENSP00000265462,9606.ENSP00000273283,9606.ENSP00000284981,9606.ENSP00000295550,9606.ENSP00000298510,9606.ENSP00000308541,9606.ENSP00000314067,9606.ENSP00000316779,9606.ENSP00000321108,9606.ENSP00000323929,9606.ENSP00000333203,9606.ENSP00000342850,9606.ENSP00000351190,…	SERPIND1,C5,VTN,HRG,C3,THBS1,PRDX5,ITIH1,APP,COL6A3,PRDX3,F2,PAK2,BIN1,SPOCK2,A2M,SERPINA5,SERPINA6,ITIH2,AGT,RPS6KA3,SERPINB12,SERPINB5,PROS1,GAPDH,PRNP,C4B,SERPINA1,SERPINA3,KNG1
GO Process	GO:0097435	Supramolecular fiber organization	38	570	0.68	4.73e-12	9606.ENSP00000167586,9606.ENSP00000222271,9606.ENSP00000246635,9606.ENSP00000252242,9606.ENSP00000252244,9606.ENSP00000252804,9606.ENSP00000258201,9606.ENSP00000263710,9606.ENSP00000266718,9606.ENSP00000279022,9606.ENSP00000284981,9606.ENSP00000290158,9606.ENSP00000297848,9606.ENSP00000303908,9606.ENSP00000305699,9606.ENSP00000309953,9606.ENSP00000310861,9606.ENSP00000311905,9606.ENSP00000325146,…	KRT14,COMP,KRT13,KRT5,KRT1,PXDN,FHOD1,CLASP1,LUM,MYL9,APP,KPNB1,COL14A1,TWF2,HOOK3,EFEMP2,KRT2,LTBP4,COL12A1,FLNC,KRT7,ANG,CORO1B,KRT77,DYNC1H1,DCTN1,KRT19,COL5A1,DSP,KRT6A,FSCN1,LCP1,TF,PSTPIP2,CORO1C,TNXB,VIM,TTN
GO Process	GO:0043086	Negative regulation of catalytic activity	44	771	0.61	4.81e-12	9606.ENSP00000215727,9606.ENSP00000223642,9606.ENSP00000226218,9606.ENSP00000227667,9606.ENSP00000232003,9606.ENSP00000236850,9606.ENSP00000245907,9606.ENSP00000255040,9606.ENSP00000260356,9606.ENSP00000262418,9606.ENSP00000265462,9606.ENSP00000268182,9606.ENSP00000273283,9606.ENSP00000284981,9606.ENSP00000295550,9606.ENSP00000298510,9606.ENSP00000312999,9606.ENSP00000314067,9606.ENSP00000316779,…	SERPIND1,C5,VTN,APOC3,HRG,APOA1,C3,APCS,THBS1,SLC4A1,PRDX5,IQGAP1,ITIH1,APP,COL6A3,PRDX3,GNAI2,PAK2,BIN1,SPOCK2,A2M,SERPINA5,SERPINA6,ITIH2,AGT,ANXA1,RPS6KA3,IPO7,SERPINB12,SERPINB5,PROS1,GAPDH,PPP1R12A,CORO1C,PRNP,PTPRC,C4B,SERPINA1,SERPINA3,APOC2,HNRNPU,KNG1,NOTCH1,SNX6
GO Process	GO:0006955	Immune response	58	1321	0.5	8.34e-12	9606.ENSP00000207549,9606.ENSP00000212355,9606.ENSP00000217407,9606.ENSP00000223642,9606.ENSP00000226218,9606.ENSP00000232003,9606.ENSP00000245907,9606.ENSP00000252244,9606.ENSP00000252804,9606.ENSP00000253354,9606.ENSP00000253496,9606.ENSP00000255040,9606.ENSP00000256646,9606.ENSP00000260356,9606.ENSP00000262746,9606.ENSP00000263408,9606.ENSP00000265983,9606.ENSP00000284981,9606.ENSP00000291744,…	UNC13D,TGFBR3,LBP,C5,VTN,HRG,C3,KRT1,PXDN,BPIFB1,F12,APCS,NOTCH2,THBS1,PRDX1,C9,HPX,APP,FCN2,CAMP,C2,F2,C1QB,CLU,APOL1,C7,A2M,ANG,PCBP2,C8A,CFH,ATP1B1,C8B,C8G,FCN1,C1QC,ANXA1,IPO7,KRT6A,SSC5D,XRCC5,CXCL12,GAPDH,LCP1,TF,C4B,CFB,PIK3CG,FLNB,C1R,OTUB1,VIM,IGHD,CCL14,CCL18,IGHV3-72,KNG1,NOTCH1
GO Process	GO:0045087	Innate immune response	43	754	0.61	9.44e-12	9606.ENSP00000207549,9606.ENSP00000217407,9606.ENSP00000223642,9606.ENSP00000245907,9606.ENSP00000252244,9606.ENSP00000253354,9606.ENSP00000253496,9606.ENSP00000255040,9606.ENSP00000262746,9606.ENSP00000263408,9606.ENSP00000265983,9606.ENSP00000284981,9606.ENSP00000291744,9606.ENSP00000296435,9606.ENSP00000299367,9606.ENSP00000313967,9606.ENSP00000315130,9606.ENSP00000317674,9606.ENSP00000322061,…	UNC13D,LBP,C5,C3,KRT1,BPIFB1,F12,APCS,PRDX1,C9,HPX,APP,FCN2,CAMP,C2,C1QB,CLU,APOL1,C7,ANG,PCBP2,C8A,CFH,ATP1B1,C8B,C8G,FCN1,C1QC,ANXA1,IPO7,SSC5D,XRCC5,GAPDH,C4B,CFB,PIK3CG,FLNB,C1R,VIM,IGHD,CCL14,CCL18,IGHV3-72
GO Process	GO:0002376	Immune system process	74	2121	0.4	7.56e-11	9606.ENSP00000207549,9606.ENSP00000212355,9606.ENSP00000217407,9606.ENSP00000223642,9606.ENSP00000226218,9606.ENSP00000230036,9606.ENSP00000232003,9606.ENSP00000245907,9606.ENSP00000252244,9606.ENSP00000252804,9606.ENSP00000253354,9606.ENSP00000253496,9606.ENSP00000255040,9606.ENSP00000256646,9606.ENSP00000260356,9606.ENSP00000262418,9606.ENSP00000262746,9606.ENSP00000263025,9606.ENSP00000263408,…	UNC13D,TGFBR3,LBP,C5,VTN,GPLD1,HRG,C3,KRT1,PXDN,BPIFB1,F12,APCS,NOTCH2,THBS1,SLC4A1,PRDX1,MAPK3,C9,HPX,APP,FCN2,AZGP1,CAMP,PRDX3,C2,PRDX2,MAP2K1,F2,C1QB,PAK2,CLU,APOL1,CALR,C7,A2M,ANG,RPL22,PCBP2,C8A,CFH,ATP1B1,C8B,C8G,FCN1,C1QC,ANXA1,IPO7,KRT6A,SERPINB12,SSC5D,XRCC5,CXCL12,GAPDH,LCP1,TF,RPS14,PTPRC,C4B,CFB,PIK3CG,FLNB,PGM3,C1R,OTUB1,VIM,IGHD,CCL14,CCL18,IGHV3-72,PTPN11,KNG1,MTHFD1,NOTCH1
GO Process	GO:0002252	Immune effector process	29	375	0.75	2.46e-10	9606.ENSP00000207549,9606.ENSP00000217407,9606.ENSP00000223642,9606.ENSP00000245907,9606.ENSP00000252244,9606.ENSP00000256646,9606.ENSP00000262746,9606.ENSP00000263408,9606.ENSP00000284981,9606.ENSP00000291744,9606.ENSP00000299367,9606.ENSP00000301522,9606.ENSP00000308541,9606.ENSP00000313967,9606.ENSP00000315130,9606.ENSP00000322061,9606.ENSP00000354458,9606.ENSP00000356399,9606.ENSP00000360281,…	UNC13D,LBP,C5,C3,KRT1,NOTCH2,PRDX1,C9,APP,FCN2,C2,PRDX2,F2,C1QB,CLU,C7,C8A,CFH,C8B,C8G,FCN1,C1QC,LCP1,C4B,CFB,PIK3CG,C1R,IGHD,IGHV3-72
GO Process	GO:0052548	Regulation of endopeptidase activity	30	414	0.72	4.3e-10	9606.ENSP00000215727,9606.ENSP00000223642,9606.ENSP00000226218,9606.ENSP00000232003,9606.ENSP00000245907,9606.ENSP00000260356,9606.ENSP00000265462,9606.ENSP00000273283,9606.ENSP00000284981,9606.ENSP00000295550,9606.ENSP00000298510,9606.ENSP00000314067,9606.ENSP00000316779,9606.ENSP00000321108,9606.ENSP00000323929,9606.ENSP00000333203,9606.ENSP00000342850,9606.ENSP00000351190,9606.ENSP00000355627,…	SERPIND1,C5,VTN,HRG,C3,THBS1,PRDX5,ITIH1,APP,COL6A3,PRDX3,PAK2,BIN1,SPOCK2,A2M,SERPINA5,SERPINA6,ITIH2,AGT,RPS6KA3,SERPINB12,SERPINB5,PROS1,GAPDH,PSMD14,PRNP,C4B,SERPINA1,SERPINA3,KNG1
GO Process	GO:0052547	Regulation of peptidase activity	31	446	0.7	4.63e-10	9606.ENSP00000215727,9606.ENSP00000223061,9606.ENSP00000223642,9606.ENSP00000226218,9606.ENSP00000232003,9606.ENSP00000245907,9606.ENSP00000260356,9606.ENSP00000265462,9606.ENSP00000273283,9606.ENSP00000284981,9606.ENSP00000295550,9606.ENSP00000298510,9606.ENSP00000314067,9606.ENSP00000316779,9606.ENSP00000321108,9606.ENSP00000323929,9606.ENSP00000333203,9606.ENSP00000342850,9606.ENSP00000351190,…	SERPIND1,PCOLCE,C5,VTN,HRG,C3,THBS1,PRDX5,ITIH1,APP,COL6A3,PRDX3,PAK2,BIN1,SPOCK2,A2M,SERPINA5,SERPINA6,ITIH2,AGT,RPS6KA3,SERPINB12,SERPINB5,PROS1,GAPDH,PSMD14,PRNP,C4B,SERPINA1,SERPINA3,KNG1
GO Process	GO:0030198	Extracellular matrix organization	25	278	0.81	4.67e-10	9606.ENSP00000222271,9606.ENSP00000222399,9606.ENSP00000226218,9606.ENSP00000252804,9606.ENSP00000254898,9606.ENSP00000258341,9606.ENSP00000264187,9606.ENSP00000266718,9606.ENSP00000284981,9606.ENSP00000297848,9606.ENSP00000309953,9606.ENSP00000311905,9606.ENSP00000321108,9606.ENSP00000325146,9606.ENSP00000346478,9606.ENSP00000352798,9606.ENSP00000358035,9606.ENSP00000360882,9606.ENSP00000361842,…	COMP,LAMB1,VTN,PXDN,MATN2,LAMC1,NID1,LUM,APP,COL14A1,EFEMP2,LTBP4,SPOCK2,COL12A1,ADAMTSL2,COL18A1,ADAMTSL4,COL5A1,MATN4,MATN1,POSTN,SERPINB5,LCP1,MATN3,TNXB
GO Process	GO:0044092	Negative regulation of molecular function	50	1143	0.5	6.4e-10	9606.ENSP00000215727,9606.ENSP00000223642,9606.ENSP00000226218,9606.ENSP00000227667,9606.ENSP00000232003,9606.ENSP00000236850,9606.ENSP00000241052,9606.ENSP00000245907,9606.ENSP00000252804,9606.ENSP00000255040,9606.ENSP00000260356,9606.ENSP00000262418,9606.ENSP00000263025,9606.ENSP00000265462,9606.ENSP00000268182,9606.ENSP00000273283,9606.ENSP00000284981,9606.ENSP00000295550,9606.ENSP00000298510,…	SERPIND1,C5,VTN,APOC3,HRG,APOA1,CAT,C3,PXDN,APCS,THBS1,SLC4A1,MAPK3,PRDX5,IQGAP1,ITIH1,APP,COL6A3,PRDX3,PRDX2,OXSR1,GNAI2,PAK2,BIN1,SPOCK2,A2M,SERPINA5,SERPINA6,ITIH2,AGT,ANXA1,RPS6KA3,IPO7,SERPINB12,SERPINB5,PROS1,GAPDH,PPP1R12A,CORO1C,PRNP,PTPRC,C4B,SERPINA1,SERPINA3,ITGB3,APOC2,HNRNPU,KNG1,NOTCH1,SNX6
GO Process	GO:0030162	Regulation of proteolysis	39	739	0.58	1.28e-09	9606.ENSP00000215727,9606.ENSP00000223061,9606.ENSP00000223642,9606.ENSP00000226218,9606.ENSP00000229268,9606.ENSP00000230036,9606.ENSP00000232003,9606.ENSP00000245907,9606.ENSP00000253496,9606.ENSP00000260356,9606.ENSP00000262306,9606.ENSP00000265462,9606.ENSP00000273283,9606.ENSP00000284981,9606.ENSP00000295550,9606.ENSP00000298510,9606.ENSP00000308541,9606.ENSP00000314067,9606.ENSP00000315130,…	SERPIND1,PCOLCE,C5,VTN,USP5,GPLD1,HRG,C3,F12,THBS1,ELOB,PRDX5,ITIH1,APP,COL6A3,PRDX3,F2,PAK2,CLU,BIN1,SPOCK2,A2M,SERPINA5,SERPINA6,ITIH2,AGT,RPS6KA3,SERPINB12,SERPINB5,PROS1,GAPDH,PSMD14,PRNP,C4B,SERPINA1,SERPINA3,PSMC3,KNG1,ENO1
GO Process	GO:0002253	Activation of immune response	24	271	0.8	1.52e-09	9606.ENSP00000223642,9606.ENSP00000230036,9606.ENSP00000245907,9606.ENSP00000252244,9606.ENSP00000263408,9606.ENSP00000291744,9606.ENSP00000299367,9606.ENSP00000313967,9606.ENSP00000314067,9606.ENSP00000315130,9606.ENSP00000322061,9606.ENSP00000354458,9606.ENSP00000356399,9606.ENSP00000360281,9606.ENSP00000360697,9606.ENSP00000360871,9606.ENSP00000363770,9606.ENSP00000375978,9606.ENSP00000411355,…	C5,GPLD1,C3,KRT1,C9,FCN2,C2,C1QB,PAK2,CLU,C7,C8A,CFH,C8B,C8G,FCN1,C1QC,XRCC5,PTPRC,C4B,CFB,C1R,IGHD,IGHV3-72
GO Process	GO:0051336	Regulation of hydrolase activity	46	1011	0.51	1.52e-09	9606.ENSP00000205948,9606.ENSP00000215727,9606.ENSP00000223061,9606.ENSP00000223642,9606.ENSP00000226218,9606.ENSP00000227667,9606.ENSP00000230036,9606.ENSP00000232003,9606.ENSP00000236850,9606.ENSP00000245907,9606.ENSP00000255040,9606.ENSP00000260356,9606.ENSP00000265462,9606.ENSP00000268182,9606.ENSP00000273283,9606.ENSP00000284981,9606.ENSP00000295550,9606.ENSP00000298510,9606.ENSP00000312999,…	APOH,SERPIND1,PCOLCE,C5,VTN,APOC3,GPLD1,HRG,APOA1,C3,APCS,THBS1,PRDX5,IQGAP1,ITIH1,APP,COL6A3,PRDX3,GNAI2,PAK2,BIN1,SPOCK2,A2M,SERPINA5,ANG,SERPINA6,ITIH2,AGT,ANXA1,RPS6KA3,SERPINB12,SERPINB5,PROS1,GAPDH,PSMD14,PPP1R12A,CORO1C,PRNP,PTPRC,C4B,SERPINA1,SERPINA3,APOC2,CCL14,CCL18,KNG1
GO Process	GO:0042060	Wound healing	26	336	0.75	3e-09	9606.ENSP00000205948,9606.ENSP00000215727,9606.ENSP00000218099,9606.ENSP00000222271,9606.ENSP00000232003,9606.ENSP00000253496,9606.ENSP00000256646,9606.ENSP00000261405,9606.ENSP00000262418,9606.ENSP00000279022,9606.ENSP00000279227,9606.ENSP00000302621,9606.ENSP00000308541,9606.ENSP00000316029,9606.ENSP00000340211,9606.ENSP00000360882,9606.ENSP00000364709,9606.ENSP00000369129,9606.ENSP00000369317,…	APOH,SERPIND1,F9,COMP,HRG,F12,NOTCH2,VWF,SLC4A1,MYL9,FERMT3,LRG1,F2,TLN1,CORO1B,COL5A1,F10,DSP,KRT6A,PDCD10,PROS1,SERPINA1,PIK3CG,ITGB3,KNG1,HBB
GO Process	GO:0048518	Positive regulation of biological process	141	6207	0.21	3.91e-09	9606.ENSP00000012443,9606.ENSP00000200676,9606.ENSP00000205948,9606.ENSP00000207549,9606.ENSP00000212355,9606.ENSP00000217407,9606.ENSP00000222271,9606.ENSP00000222381,9606.ENSP00000222399,9606.ENSP00000223061,9606.ENSP00000223642,9606.ENSP00000225655,9606.ENSP00000226218,9606.ENSP00000229268,9606.ENSP00000230036,9606.ENSP00000232003,9606.ENSP00000233242,9606.ENSP00000236850,9606.ENSP00000241052,…	PPP5C,CETP,APOH,UNC13D,TGFBR3,LBP,COMP,PON1,LAMB1,PCOLCE,C5,PFN1,VTN,USP5,GPLD1,HRG,APOB,APOA1,CAT,C3,KRT1,PLVAP,F12,NOTCH2,FHOD1,LAMC1,ORM1,THBS1,VWF,ELOB,MAPK3,NOTCH3,C9,CLASP1,NID1,TNC,PRDX5,HPX,LUM,IQGAP1,KRT10,S100A11,FERMT3,APP,STOM,APPL1,FCN2,PKDCC,CAMP,PRDX3,C2,PRDX2,MAP2K1,LRG1,TWF2,F2,EFEMP2,KRT2,OXSR1,GNAI2,C1QB,PAK2,CLU,BIN1,NCL,CALR,SPOCK2,C7,EHD3,ANG,CORO1B,DNM3,DYNC1H1,SPTBN1,CACNA…
GO Process	GO:0051239	Regulation of multicellular organismal process	82	2749	0.33	5.06e-09	9606.ENSP00000205948,9606.ENSP00000212355,9606.ENSP00000217407,9606.ENSP00000222271,9606.ENSP00000223642,9606.ENSP00000225655,9606.ENSP00000226218,9606.ENSP00000227667,9606.ENSP00000230036,9606.ENSP00000232003,9606.ENSP00000236850,9606.ENSP00000245907,9606.ENSP00000252244,9606.ENSP00000253496,9606.ENSP00000255040,9606.ENSP00000256646,9606.ENSP00000259396,9606.ENSP00000260356,9606.ENSP00000263025,…	APOH,TGFBR3,LBP,COMP,C5,PFN1,VTN,APOC3,GPLD1,HRG,APOA1,C3,KRT1,F12,APCS,NOTCH2,ORM1,THBS1,MAPK3,CLASP1,LUM,IQGAP1,MYL9,APP,APPL1,PKDCC,CAMP,PRDX2,MAP2K1,LRG1,TWF2,HOOK3,NPTX1,F2,STAB1,GNAI2,CLU,BIN1,CALR,EHD3,DYNC1H1,SPTBN1,CACNA2D1,FH,AGT,ATP1B1,LMNA,FCN1,NIBAN2,PGK1,MATN1,C1QC,HSPG2,ANXA1,CLSTN1,DSP,PTPRD,C1QTNF3,SSC5D,XRCC5,PDCD10,PROS1,EFEMP1,CXCL12,GAPDH,TF,RAB1A,RELN,CORO1C,PRNP,PTPRC,PIK3C…
GO Process	GO:0051246	Regulation of protein metabolic process	79	2622	0.34	8.51e-09	9606.ENSP00000215727,9606.ENSP00000223061,9606.ENSP00000223642,9606.ENSP00000226218,9606.ENSP00000229268,9606.ENSP00000230036,9606.ENSP00000232003,9606.ENSP00000236850,9606.ENSP00000245907,9606.ENSP00000246635,9606.ENSP00000253496,9606.ENSP00000255040,9606.ENSP00000260356,9606.ENSP00000261772,9606.ENSP00000262306,9606.ENSP00000263025,9606.ENSP00000265462,9606.ENSP00000265983,9606.ENSP00000268182,…	SERPIND1,PCOLCE,C5,VTN,USP5,GPLD1,HRG,APOA1,C3,KRT13,F12,APCS,THBS1,AARS1,ELOB,MAPK3,PRDX5,HPX,IQGAP1,ITIH1,APP,COL6A3,CAMP,PRDX3,MAP2K1,F2,PSMD1,GNAI2,PAK2,CLU,BIN1,NCL,CALR,SPOCK2,A2M,SERPINA5,ANG,SERPINA6,RPL22,ITIH2,FH,AGT,NIBAN1,LMNA,HSPG2,RPS6KA3,IPO7,SERPINB12,SERPINB5,XRCC5,PDCD10,PROS1,GAPDH,NSF,CUL4B,RPS14,PSMD14,RAB1A,PPP1R12A,RELN,CORO1C,GSPT1,PRNP,TNXB,PTPRC,C4B,SERPINA1,PIK3CG,OTUB1…
GO Process	GO:0007596	Blood coagulation	19	173	0.9	8.74e-09	9606.ENSP00000205948,9606.ENSP00000215727,9606.ENSP00000218099,9606.ENSP00000222271,9606.ENSP00000232003,9606.ENSP00000253496,9606.ENSP00000261405,9606.ENSP00000262418,9606.ENSP00000279022,9606.ENSP00000279227,9606.ENSP00000308541,9606.ENSP00000316029,9606.ENSP00000364709,9606.ENSP00000377783,9606.ENSP00000416066,9606.ENSP00000419260,9606.ENSP00000452786,9606.ENSP00000493985,9606.ENSP00000494175	APOH,SERPIND1,F9,COMP,HRG,F12,VWF,SLC4A1,MYL9,FERMT3,F2,TLN1,F10,PROS1,SERPINA1,PIK3CG,ITGB3,KNG1,HBB
GO Process	GO:0006957	Complement activation, alternative pathway	9	16	1.61	1.02e-08	9606.ENSP00000223642,9606.ENSP00000245907,9606.ENSP00000263408,9606.ENSP00000322061,9606.ENSP00000354458,9606.ENSP00000356399,9606.ENSP00000360281,9606.ENSP00000360697,9606.ENSP00000416561	C5,C3,C9,C7,C8A,CFH,C8B,C8G,CFB
GO Process	GO:0051248	Negative regulation of protein metabolic process	45	1038	0.49	1.02e-08	9606.ENSP00000215727,9606.ENSP00000223642,9606.ENSP00000226218,9606.ENSP00000232003,9606.ENSP00000245907,9606.ENSP00000255040,9606.ENSP00000260356,9606.ENSP00000265462,9606.ENSP00000273283,9606.ENSP00000284981,9606.ENSP00000295550,9606.ENSP00000298510,9606.ENSP00000308541,9606.ENSP00000312999,9606.ENSP00000314067,9606.ENSP00000315130,9606.ENSP00000316779,9606.ENSP00000318195,9606.ENSP00000320866,…	SERPIND1,C5,VTN,HRG,C3,APCS,THBS1,PRDX5,ITIH1,APP,COL6A3,PRDX3,F2,GNAI2,PAK2,CLU,BIN1,NCL,CALR,SPOCK2,A2M,SERPINA5,ANG,SERPINA6,ITIH2,FH,AGT,NIBAN1,HSPG2,RPS6KA3,IPO7,SERPINB12,SERPINB5,PROS1,GAPDH,CORO1C,PRNP,PTPRC,C4B,SERPINA1,OTUB1,SERPINA3,ITGB3,KNG1,SNX6
GO Process	GO:0009888	Tissue development	60	1723	0.4	1.72e-08	9606.ENSP00000167586,9606.ENSP00000212355,9606.ENSP00000222271,9606.ENSP00000222399,9606.ENSP00000225655,9606.ENSP00000226218,9606.ENSP00000230036,9606.ENSP00000241052,9606.ENSP00000245907,9606.ENSP00000246635,9606.ENSP00000252242,9606.ENSP00000252244,9606.ENSP00000256646,9606.ENSP00000258341,9606.ENSP00000263025,9606.ENSP00000265131,9606.ENSP00000268182,9606.ENSP00000269576,9606.ENSP00000294964,…	KRT14,TGFBR3,COMP,LAMB1,PFN1,VTN,GPLD1,CAT,C3,KRT13,KRT5,KRT1,NOTCH2,LAMC1,MAPK3,TNC,IQGAP1,KRT10,PKDCC,MAP2K1,LRG1,EFEMP2,KRT2,CALR,COL12A1,KRT7,KRT77,ADAMTSL2,COL18A1,KRT19,COL6A1,AGT,LMNA,THBS3,ADAMTSL4,COL5A1,MINPP1,PGK1,MATN1,SVEP1,HSPG2,ANXA1,POSTN,DSP,KRT6A,SERPINB5,FLG2,PDCD10,MATN3,CORO1C,CPS1,PTPRC,FLNB,VIM,ITGB3,TTN,PTPRS,HNRNPU,MTHFD1,NOTCH1
GO Process	GO:0050896	Response to stimulus	163	7835	0.17	1.73e-08	9606.ENSP00000012443,9606.ENSP00000205948,9606.ENSP00000207549,9606.ENSP00000212355,9606.ENSP00000215727,9606.ENSP00000217407,9606.ENSP00000218099,9606.ENSP00000222271,9606.ENSP00000222381,9606.ENSP00000223642,9606.ENSP00000226218,9606.ENSP00000227667,9606.ENSP00000230036,9606.ENSP00000232003,9606.ENSP00000233242,9606.ENSP00000236850,9606.ENSP00000241052,9606.ENSP00000245907,9606.ENSP00000246635,…	PPP5C,APOH,UNC13D,TGFBR3,SERPIND1,LBP,F9,COMP,PON1,C5,VTN,APOC3,GPLD1,HRG,APOB,APOA1,CAT,C3,KRT13,CANX,KRT5,KRT1,PLVAP,PXDN,BPIFB1,F12,APCS,NOTCH2,DSG1,ORM1,THBS1,VWF,ITGA2B,SLC4A1,PRDX1,LGALS3BP,MAPK3,NOTCH3,C9,TNC,PRDX5,HPX,IQGAP1,S100A11,MYL9,FERMT3,APP,APPL1,KPNB1,FCN2,AZGP1,CAMP,PRDX3,C2,COL6A2,PRDX2,MAP2K1,LRG1,HSPA4,TWF2,NPTX1,F2,OXSR1,LTBP4,STAB1,GNAI2,C1QB,PAK2,CLU,TLN1,APOL1,NCL,CALR,SP…
GO Process	GO:0032101	Regulation of response to external stimulus	42	964	0.5	3.78e-08	9606.ENSP00000205948,9606.ENSP00000217407,9606.ENSP00000223642,9606.ENSP00000226218,9606.ENSP00000232003,9606.ENSP00000236850,9606.ENSP00000245907,9606.ENSP00000252244,9606.ENSP00000253496,9606.ENSP00000255040,9606.ENSP00000260356,9606.ENSP00000263025,9606.ENSP00000263710,9606.ENSP00000265131,9606.ENSP00000265983,9606.ENSP00000284981,9606.ENSP00000288266,9606.ENSP00000291744,9606.ENSP00000301522,…	APOH,LBP,C5,VTN,HRG,APOA1,C3,KRT1,F12,APCS,THBS1,MAPK3,CLASP1,TNC,HPX,APP,APPL1,FCN2,PRDX2,MAP2K1,F2,OXSR1,PAK2,CALR,A2M,CORO1B,PCBP2,AGT,CFH,FCN1,ANXA1,C1QTNF3,XRCC5,PROS1,CXCL12,PLA2G2A,PTPRC,PIK3CG,PTPRS,PTPN11,KNG1,NOTCH1
GO Process	GO:0050878	Regulation of body fluid levels	25	371	0.69	8.55e-08	9606.ENSP00000205948,9606.ENSP00000215727,9606.ENSP00000218099,9606.ENSP00000222271,9606.ENSP00000226218,9606.ENSP00000232003,9606.ENSP00000252244,9606.ENSP00000253496,9606.ENSP00000260356,9606.ENSP00000261405,9606.ENSP00000262418,9606.ENSP00000279022,9606.ENSP00000279227,9606.ENSP00000301522,9606.ENSP00000308541,9606.ENSP00000312999,9606.ENSP00000316029,9606.ENSP00000364709,9606.ENSP00000373370,…	APOH,SERPIND1,F9,COMP,VTN,HRG,KRT1,F12,THBS1,VWF,SLC4A1,MYL9,FERMT3,PRDX2,F2,GNAI2,TLN1,F10,FLG2,PROS1,SERPINA1,PIK3CG,ITGB3,KNG1,HBB
GO Process	GO:0065008	Regulation of biological quality	95	3654	0.27	8.71e-08	9606.ENSP00000200676,9606.ENSP00000205948,9606.ENSP00000212355,9606.ENSP00000215727,9606.ENSP00000218099,9606.ENSP00000222271,9606.ENSP00000225655,9606.ENSP00000226218,9606.ENSP00000226355,9606.ENSP00000227667,9606.ENSP00000230036,9606.ENSP00000232003,9606.ENSP00000233242,9606.ENSP00000236850,9606.ENSP00000252244,9606.ENSP00000252590,9606.ENSP00000253496,9606.ENSP00000257192,9606.ENSP00000258341,…	CETP,APOH,TGFBR3,SERPIND1,F9,COMP,PFN1,VTN,AFM,APOC3,GPLD1,HRG,APOB,APOA1,KRT1,PLVAP,F12,DSG1,LAMC1,THBS1,VWF,AARS1,SLC4A1,PRDX1,MAPK3,CP,PRDX5,HPX,MYL9,FERMT3,APP,AZGP1,PRDX3,PRDX2,TWF2,NPTX1,F2,LTBP4,GNAI2,CLU,TLN1,BIN1,CPN2,CALR,EHD3,ANG,DNM3,DYNC1H1,SPTBN1,CACNA2D1,DCTN1,FH,AGT,ATP1B1,LMNA,SERBP1,NIBAN2,F10,ANXA1,CLSTN1,DSP,PTPRD,C1QTNF3,FLG2,PDCD10,PROS1,CXCL12,CARHSP1,GAPDH,PLA2G2A,TF,RPS14…
GO Process	GO:0002684	Positive regulation of immune system process	39	874	0.51	9.27e-08	9606.ENSP00000207549,9606.ENSP00000217407,9606.ENSP00000223642,9606.ENSP00000230036,9606.ENSP00000232003,9606.ENSP00000245907,9606.ENSP00000252244,9606.ENSP00000252590,9606.ENSP00000256646,9606.ENSP00000260356,9606.ENSP00000263025,9606.ENSP00000263408,9606.ENSP00000265983,9606.ENSP00000284981,9606.ENSP00000291744,9606.ENSP00000299367,9606.ENSP00000311713,9606.ENSP00000313967,9606.ENSP00000314067,…	UNC13D,LBP,C5,GPLD1,HRG,C3,KRT1,PLVAP,NOTCH2,THBS1,MAPK3,C9,HPX,APP,FCN2,C2,OXSR1,C1QB,PAK2,CLU,CALR,C7,C8A,CFH,C8B,C8G,FCN1,C1QC,ANXA1,XRCC5,CXCL12,PTPRC,C4B,CFB,C1R,ITGB3,IGHD,IGHV3-72,PTPN11
GO Process	GO:0002449	Lymphocyte mediated immunity	17	159	0.89	1.11e-07	9606.ENSP00000207549,9606.ENSP00000223642,9606.ENSP00000245907,9606.ENSP00000262746,9606.ENSP00000263408,9606.ENSP00000299367,9606.ENSP00000313967,9606.ENSP00000315130,9606.ENSP00000322061,9606.ENSP00000354458,9606.ENSP00000360281,9606.ENSP00000360697,9606.ENSP00000363770,9606.ENSP00000415941,9606.ENSP00000444271,9606.ENSP00000478893,9606.ENSP00000480035	UNC13D,C5,C3,PRDX1,C9,C2,C1QB,CLU,C7,C8A,C8B,C8G,C1QC,C4B,C1R,IGHD,IGHV3-72
GO Process	GO:0050776	Regulation of immune response	38	844	0.51	1.22e-07	9606.ENSP00000207549,9606.ENSP00000217407,9606.ENSP00000223642,9606.ENSP00000230036,9606.ENSP00000232003,9606.ENSP00000245907,9606.ENSP00000252244,9606.ENSP00000253354,9606.ENSP00000263408,9606.ENSP00000265983,9606.ENSP00000284981,9606.ENSP00000288266,9606.ENSP00000291744,9606.ENSP00000299367,9606.ENSP00000313967,9606.ENSP00000314067,9606.ENSP00000315130,9606.ENSP00000322061,9606.ENSP00000323929,…	UNC13D,LBP,C5,GPLD1,HRG,C3,KRT1,BPIFB1,C9,HPX,APP,APPL1,FCN2,C2,C1QB,PAK2,CLU,C7,A2M,C8A,CFH,C8B,C8G,FCN1,C1QC,ANXA1,RPS6KA3,PTPRD,XRCC5,PRNP,PTPRC,C4B,CFB,C1R,PTPRS,IGHD,IGHV3-72,PTPN11
GO Process	GO:0009611	Response to wounding	27	444	0.64	1.23e-07	9606.ENSP00000205948,9606.ENSP00000215727,9606.ENSP00000218099,9606.ENSP00000222271,9606.ENSP00000232003,9606.ENSP00000253496,9606.ENSP00000256646,9606.ENSP00000261405,9606.ENSP00000262418,9606.ENSP00000265131,9606.ENSP00000279022,9606.ENSP00000279227,9606.ENSP00000302621,9606.ENSP00000308541,9606.ENSP00000316029,9606.ENSP00000340211,9606.ENSP00000360882,9606.ENSP00000364709,9606.ENSP00000369129,…	APOH,SERPIND1,F9,COMP,HRG,F12,NOTCH2,VWF,SLC4A1,TNC,MYL9,FERMT3,LRG1,F2,TLN1,CORO1B,COL5A1,F10,DSP,KRT6A,PDCD10,PROS1,SERPINA1,PIK3CG,ITGB3,KNG1,HBB
GO Process	GO:0016043	Cellular component organization	124	5436	0.21	1.33e-07	9606.ENSP00000167586,9606.ENSP00000200676,9606.ENSP00000212355,9606.ENSP00000217133,9606.ENSP00000222271,9606.ENSP00000222399,9606.ENSP00000225655,9606.ENSP00000226218,9606.ENSP00000227667,9606.ENSP00000233242,9606.ENSP00000236850,9606.ENSP00000245907,9606.ENSP00000246635,9606.ENSP00000252242,9606.ENSP00000252244,9606.ENSP00000252804,9606.ENSP00000254898,9606.ENSP00000255040,9606.ENSP00000256646,…	KRT14,CETP,TGFBR3,TUBB1,COMP,LAMB1,PFN1,VTN,APOC3,APOB,APOA1,C3,KRT13,KRT5,KRT1,PXDN,MATN2,APCS,NOTCH2,DSG1,FHOD1,LAMC1,THBS1,ELOB,SLC4A1,NOTCH3,C9,CLASP1,NID1,TNC,LUM,IQGAP1,CDH11,KRT10,MYL9,FERMT3,APP,KPNB1,COL14A1,PRDX3,HSPA4,TWF2,HOOK3,NPTX1,EFEMP2,KRT2,LTBP4,C1QB,PAK2,CLU,TLN1,BIN1,CALR,SPOCK2,COL12A1,EHD3,FLNC,KRT7,SERPINA5,ANG,CORO1B,KRT77,ADAMTSL2,DNM3,DYNC1H1,SPTBN1,COL18A1,DCTN1,KRT19,A…
GO Process	GO:0002443	Leukocyte mediated immunity	19	211	0.81	1.36e-07	9606.ENSP00000207549,9606.ENSP00000223642,9606.ENSP00000245907,9606.ENSP00000262746,9606.ENSP00000263408,9606.ENSP00000299367,9606.ENSP00000308541,9606.ENSP00000313967,9606.ENSP00000315130,9606.ENSP00000322061,9606.ENSP00000354458,9606.ENSP00000360281,9606.ENSP00000360697,9606.ENSP00000363770,9606.ENSP00000415941,9606.ENSP00000419260,9606.ENSP00000444271,9606.ENSP00000478893,9606.ENSP00000480035	UNC13D,C5,C3,PRDX1,C9,C2,F2,C1QB,CLU,C7,C8A,C8B,C8G,C1QC,C4B,PIK3CG,C1R,IGHD,IGHV3-72
GO Process	GO:0002460	Adaptive immune response based on somatic recombination of immune receptors built from immunoglobulin superfamily domains	17	169	0.86	2.38e-07	9606.ENSP00000207549,9606.ENSP00000223642,9606.ENSP00000245907,9606.ENSP00000263408,9606.ENSP00000299367,9606.ENSP00000313967,9606.ENSP00000315130,9606.ENSP00000322061,9606.ENSP00000354458,9606.ENSP00000360281,9606.ENSP00000360697,9606.ENSP00000363770,9606.ENSP00000415941,9606.ENSP00000444271,9606.ENSP00000478893,9606.ENSP00000480035,9606.ENSP00000498587	UNC13D,C5,C3,C9,C2,C1QB,CLU,C7,C8A,C8B,C8G,C1QC,C4B,C1R,IGHD,IGHV3-72,NOTCH1
GO Process	GO:0051050	Positive regulation of transport	39	915	0.49	2.81e-07	9606.ENSP00000200676,9606.ENSP00000207549,9606.ENSP00000222381,9606.ENSP00000226218,9606.ENSP00000230036,9606.ENSP00000236850,9606.ENSP00000245907,9606.ENSP00000263710,9606.ENSP00000284981,9606.ENSP00000286713,9606.ENSP00000288266,9606.ENSP00000291744,9606.ENSP00000299367,9606.ENSP00000308541,9606.ENSP00000312999,9606.ENSP00000315130,9606.ENSP00000316779,9606.ENSP00000320866,9606.ENSP00000327116,…	CETP,UNC13D,PON1,VTN,GPLD1,APOA1,C3,CLASP1,APP,STOM,APPL1,FCN2,C2,F2,GNAI2,CLU,BIN1,CALR,EHD3,ANG,DNM3,DYNC1H1,CACNA2D1,AGT,ATP1B1,FCN1,ANXA1,C1QTNF3,PDCD10,CXCL12,TF,RELN,PRNP,PTPRC,C4B,CFB,PLTP,TTN,PTPN11
GO Process	GO:0002682	Regulation of immune system process	51	1438	0.41	2.81e-07	9606.ENSP00000207549,9606.ENSP00000217407,9606.ENSP00000223642,9606.ENSP00000230036,9606.ENSP00000232003,9606.ENSP00000236850,9606.ENSP00000245907,9606.ENSP00000252244,9606.ENSP00000252590,9606.ENSP00000253354,9606.ENSP00000255040,9606.ENSP00000256646,9606.ENSP00000259396,9606.ENSP00000260356,9606.ENSP00000263025,9606.ENSP00000263408,9606.ENSP00000265983,9606.ENSP00000284981,9606.ENSP00000288266,…	UNC13D,LBP,C5,GPLD1,HRG,APOA1,C3,KRT1,PLVAP,BPIFB1,APCS,NOTCH2,ORM1,THBS1,MAPK3,C9,HPX,APP,APPL1,FCN2,C2,PRDX2,OXSR1,C1QB,PAK2,CLU,CALR,C7,A2M,C8A,CFH,C8B,C8G,FCN1,C1QC,ANXA1,RPS6KA3,PTPRD,XRCC5,CXCL12,PLA2G2A,PRNP,PTPRC,C4B,CFB,C1R,ITGB3,PTPRS,IGHD,IGHV3-72,PTPN11
GO Process	GO:0050778	Positive regulation of immune response	28	502	0.6	3.25e-07	9606.ENSP00000217407,9606.ENSP00000223642,9606.ENSP00000230036,9606.ENSP00000232003,9606.ENSP00000245907,9606.ENSP00000252244,9606.ENSP00000263408,9606.ENSP00000265983,9606.ENSP00000291744,9606.ENSP00000299367,9606.ENSP00000313967,9606.ENSP00000314067,9606.ENSP00000315130,9606.ENSP00000322061,9606.ENSP00000354458,9606.ENSP00000356399,9606.ENSP00000360281,9606.ENSP00000360697,9606.ENSP00000360871,…	LBP,C5,GPLD1,HRG,C3,KRT1,C9,HPX,FCN2,C2,C1QB,PAK2,CLU,C7,C8A,CFH,C8B,C8G,FCN1,C1QC,ANXA1,XRCC5,PTPRC,C4B,CFB,C1R,IGHD,IGHV3-72
GO Process	GO:0006954	Inflammatory response	29	538	0.59	3.34e-07	9606.ENSP00000207549,9606.ENSP00000217407,9606.ENSP00000223642,9606.ENSP00000245907,9606.ENSP00000253496,9606.ENSP00000255040,9606.ENSP00000256646,9606.ENSP00000259396,9606.ENSP00000260356,9606.ENSP00000265462,9606.ENSP00000284981,9606.ENSP00000296435,9606.ENSP00000301522,9606.ENSP00000308541,9606.ENSP00000312946,9606.ENSP00000315130,9606.ENSP00000323929,9606.ENSP00000363827,9606.ENSP00000366109,…	UNC13D,LBP,C5,C3,F12,APCS,NOTCH2,ORM1,THBS1,PRDX5,APP,CAMP,PRDX2,F2,STAB1,CLU,A2M,HSPG2,ANXA1,PLA2G2A,C4B,SERPINA1,PIK3CG,HPR,SERPINA3,CCL14,CCL18,KNG1,NOTCH1
GO Process	GO:0048584	Positive regulation of response to stimulus	65	2131	0.34	3.5e-07	9606.ENSP00000012443,9606.ENSP00000205948,9606.ENSP00000212355,9606.ENSP00000217407,9606.ENSP00000222399,9606.ENSP00000223642,9606.ENSP00000226218,9606.ENSP00000230036,9606.ENSP00000232003,9606.ENSP00000236850,9606.ENSP00000241052,9606.ENSP00000245907,9606.ENSP00000252244,9606.ENSP00000253496,9606.ENSP00000256646,9606.ENSP00000258341,9606.ENSP00000260356,9606.ENSP00000261405,9606.ENSP00000263025,…	PPP5C,APOH,TGFBR3,LBP,LAMB1,C5,VTN,GPLD1,HRG,APOA1,CAT,C3,KRT1,F12,NOTCH2,LAMC1,THBS1,VWF,MAPK3,C9,NID1,HPX,IQGAP1,APP,FCN2,C2,PRDX2,MAP2K1,LRG1,F2,OXSR1,GNAI2,C1QB,PAK2,CLU,CALR,C7,C8A,FH,AGT,CFH,C8B,C8G,FCN1,C1QC,F10,ANXA1,XRCC5,PDCD10,CXCL12,GAPDH,PLA2G2A,RELN,PTPRC,C4B,CFB,PIK3CG,C1R,ITGB3,IGHD,CCL14,CCL18,IGHV3-72,PTPN11,NOTCH1
GO Process	GO:1903053	Regulation of extracellular matrix organization	11	56	1.15	4.44e-07	9606.ENSP00000222399,9606.ENSP00000223357,9606.ENSP00000258341,9606.ENSP00000263710,9606.ENSP00000264187,9606.ENSP00000309953,9606.ENSP00000355627,9606.ENSP00000371798,9606.ENSP00000407685,9606.ENSP00000452786,9606.ENSP00000498587	LAMB1,AEBP1,LAMC1,CLASP1,NID1,EFEMP2,AGT,FSCN1,TNXB,ITGB3,NOTCH1
GO Process	GO:0048856	Anatomical structure development	117	5117	0.22	4.87e-07	9606.ENSP00000167586,9606.ENSP00000207549,9606.ENSP00000212355,9606.ENSP00000222271,9606.ENSP00000222399,9606.ENSP00000223642,9606.ENSP00000225655,9606.ENSP00000226218,9606.ENSP00000230036,9606.ENSP00000232003,9606.ENSP00000233242,9606.ENSP00000236850,9606.ENSP00000241052,9606.ENSP00000245907,9606.ENSP00000246635,9606.ENSP00000252242,9606.ENSP00000252244,9606.ENSP00000252804,9606.ENSP00000256646,…	KRT14,UNC13D,TGFBR3,COMP,LAMB1,C5,PFN1,VTN,GPLD1,HRG,APOB,APOA1,CAT,C3,KRT13,KRT5,KRT1,PXDN,NOTCH2,LAMC1,THBS1,AARS1,ITGA2B,SLC4A1,PRDX1,MAPK3,NOTCH3,NID1,TNC,IQGAP1,CDH11,KRT10,MYL9,FERMT3,APP,PKDCC,COL6A3,PRDX3,PRDX2,MAP2K1,LRG1,HOOK3,NPTX1,EFEMP2,KRT2,C1QB,PAK2,CLU,BIN1,NCL,CALR,SPOCK2,A2M,COL12A1,FLNC,KRT7,MGAT1,ANG,KRT77,RPL22,ADAMTSL2,DNM3,SPTBN1,COL18A1,DCTN1,KRT19,COL6A1,AGT,LMNA,THBS3,AD…
GO Process	GO:0048583	Regulation of response to stimulus	96	3931	0.24	1.39e-06	9606.ENSP00000012443,9606.ENSP00000205948,9606.ENSP00000207549,9606.ENSP00000212355,9606.ENSP00000217407,9606.ENSP00000222399,9606.ENSP00000223642,9606.ENSP00000226218,9606.ENSP00000227667,9606.ENSP00000230036,9606.ENSP00000232003,9606.ENSP00000236850,9606.ENSP00000241052,9606.ENSP00000245907,9606.ENSP00000252244,9606.ENSP00000252804,9606.ENSP00000253354,9606.ENSP00000253496,9606.ENSP00000255040,…	PPP5C,APOH,UNC13D,TGFBR3,LBP,LAMB1,C5,VTN,APOC3,GPLD1,HRG,APOA1,CAT,C3,KRT1,PXDN,BPIFB1,F12,APCS,NOTCH2,LAMC1,THBS1,VWF,PRDX1,MAPK3,C9,CLASP1,NID1,TNC,HPX,IQGAP1,APP,APPL1,FCN2,C2,PRDX2,MAP2K1,LRG1,NPTX1,F2,OXSR1,LTBP4,GNAI2,C1QB,PAK2,CLU,CALR,C7,A2M,CORO1B,ADAMTSL2,SPTBN1,PCBP2,C8A,FH,AGT,CFH,LMNA,C8B,C8G,FCN1,NIBAN2,C1QC,ATF6B,F10,ANXA1,RPS6KA3,POSTN,PTPRD,C1QTNF3,XRCC5,PDCD10,PROS1,CXCL12,GAPD…
GO Process	GO:0051241	Negative regulation of multicellular organismal process	40	1035	0.44	2.13e-06	9606.ENSP00000205948,9606.ENSP00000217407,9606.ENSP00000226218,9606.ENSP00000227667,9606.ENSP00000232003,9606.ENSP00000236850,9606.ENSP00000252244,9606.ENSP00000253496,9606.ENSP00000255040,9606.ENSP00000259396,9606.ENSP00000260356,9606.ENSP00000284981,9606.ENSP00000301522,9606.ENSP00000305699,9606.ENSP00000308541,9606.ENSP00000312946,9606.ENSP00000312999,9606.ENSP00000316779,9606.ENSP00000320866,…	APOH,LBP,VTN,APOC3,HRG,APOA1,KRT1,F12,APCS,ORM1,THBS1,APP,PRDX2,HOOK3,F2,STAB1,GNAI2,BIN1,CALR,AGT,LMNA,NIBAN2,PGK1,C1QC,HSPG2,ANXA1,C1QTNF3,SSC5D,PDCD10,PROS1,EFEMP1,CORO1C,PRNP,PTPRC,PIK3CG,APOC2,PTPRS,PTPN11,KNG1,NOTCH1
GO Process	GO:0045109	Intermediate filament organization	11	69	1.06	2.86e-06	9606.ENSP00000167586,9606.ENSP00000246635,9606.ENSP00000252242,9606.ENSP00000252244,9606.ENSP00000310861,9606.ENSP00000329243,9606.ENSP00000342710,9606.ENSP00000355124,9606.ENSP00000369129,9606.ENSP00000369317,9606.ENSP00000446007	KRT14,KRT13,KRT5,KRT1,KRT2,KRT7,KRT77,KRT19,DSP,KRT6A,VIM
GO Process	GO:0051240	Positive regulation of multicellular organismal process	50	1505	0.38	2.86e-06	9606.ENSP00000205948,9606.ENSP00000212355,9606.ENSP00000217407,9606.ENSP00000223642,9606.ENSP00000226218,9606.ENSP00000230036,9606.ENSP00000232003,9606.ENSP00000245907,9606.ENSP00000253496,9606.ENSP00000256646,9606.ENSP00000259396,9606.ENSP00000260356,9606.ENSP00000266718,9606.ENSP00000284981,9606.ENSP00000288266,9606.ENSP00000294964,9606.ENSP00000296435,9606.ENSP00000301522,9606.ENSP00000302486,…	APOH,TGFBR3,LBP,C5,VTN,GPLD1,HRG,C3,F12,NOTCH2,ORM1,THBS1,LUM,APP,APPL1,PKDCC,CAMP,PRDX2,MAP2K1,LRG1,TWF2,F2,GNAI2,CLU,BIN1,DYNC1H1,SPTBN1,CACNA2D1,FH,AGT,FCN1,NIBAN2,ANXA1,CLSTN1,PTPRD,C1QTNF3,XRCC5,CXCL12,GAPDH,RAB1A,RELN,PTPRC,PIK3CG,FBN2,ITGB3,APOC2,IGHD,PTPN11,ENO1,NOTCH1
GO Process	GO:0045104	Intermediate filament cytoskeleton organization	12	88	0.99	2.9e-06	9606.ENSP00000167586,9606.ENSP00000246635,9606.ENSP00000252242,9606.ENSP00000252244,9606.ENSP00000310861,9606.ENSP00000329243,9606.ENSP00000342710,9606.ENSP00000355124,9606.ENSP00000369129,9606.ENSP00000369317,9606.ENSP00000373489,9606.ENSP00000446007	KRT14,KRT13,KRT5,KRT1,KRT2,KRT7,KRT77,KRT19,DSP,KRT6A,KRT18,VIM
GO Process	GO:1900046	Regulation of hemostasis	11	72	1.04	4e-06	9606.ENSP00000205948,9606.ENSP00000222271,9606.ENSP00000226218,9606.ENSP00000232003,9606.ENSP00000252244,9606.ENSP00000253496,9606.ENSP00000260356,9606.ENSP00000301522,9606.ENSP00000308541,9606.ENSP00000377783,9606.ENSP00000493985	APOH,COMP,VTN,HRG,KRT1,F12,THBS1,PRDX2,F2,PROS1,KNG1
GO Process	GO:0032501	Multicellular organismal process	135	6490	0.17	4.69e-06	9606.ENSP00000167586,9606.ENSP00000200676,9606.ENSP00000205948,9606.ENSP00000212355,9606.ENSP00000215727,9606.ENSP00000218099,9606.ENSP00000222271,9606.ENSP00000222399,9606.ENSP00000223642,9606.ENSP00000225655,9606.ENSP00000226218,9606.ENSP00000227667,9606.ENSP00000230036,9606.ENSP00000232003,9606.ENSP00000233242,9606.ENSP00000236850,9606.ENSP00000241052,9606.ENSP00000245907,9606.ENSP00000252242,…	KRT14,CETP,APOH,TGFBR3,SERPIND1,F9,COMP,LAMB1,C5,PFN1,VTN,APOC3,GPLD1,HRG,APOB,APOA1,CAT,C3,KRT5,KRT1,PLVAP,PXDN,F12,NOTCH2,DSG1,LAMC1,THBS1,VWF,AARS1,ITGA2B,SLC4A1,PRDX1,MAPK3,NOTCH3,NID1,TNC,PRDX5,LUM,IQGAP1,CDH11,MYL9,FERMT3,APP,AZGP1,PKDCC,PRDX3,PRDX2,MAP2K1,LRG1,HOOK3,NPTX1,F2,EFEMP2,KRT2,GNAI2,PAK2,CLU,TLN1,BIN1,NCL,CALR,SPOCK2,A2M,COL12A1,KRT7,MGAT1,SERPINA5,ANG,CORO1B,KRT77,RPL22,ADAMTSL2…
GO Process	GO:1903034	Regulation of response to wounding	15	162	0.82	5.1e-06	9606.ENSP00000205948,9606.ENSP00000226218,9606.ENSP00000232003,9606.ENSP00000252244,9606.ENSP00000253496,9606.ENSP00000255040,9606.ENSP00000260356,9606.ENSP00000263710,9606.ENSP00000301522,9606.ENSP00000302486,9606.ENSP00000308541,9606.ENSP00000366109,9606.ENSP00000377783,9606.ENSP00000467537,9606.ENSP00000493985	APOH,VTN,HRG,KRT1,F12,APCS,THBS1,CLASP1,PRDX2,MAP2K1,F2,ANXA1,PROS1,PTPRS,KNG1
GO Process	GO:0009617	Response to bacterium	30	663	0.51	6.29e-06	9606.ENSP00000217407,9606.ENSP00000233242,9606.ENSP00000245907,9606.ENSP00000256646,9606.ENSP00000263025,9606.ENSP00000284981,9606.ENSP00000291744,9606.ENSP00000296435,9606.ENSP00000298510,9606.ENSP00000299367,9606.ENSP00000301522,9606.ENSP00000302621,9606.ENSP00000308541,9606.ENSP00000312946,9606.ENSP00000336762,9606.ENSP00000368884,9606.ENSP00000369317,9606.ENSP00000373539,9606.ENSP00000374274,…	LBP,APOB,C3,NOTCH2,MAPK3,APP,FCN2,CAMP,PRDX3,C2,PRDX2,LRG1,F2,STAB1,ANG,RPS6KA3,KRT6A,STAB2,SSC5D,RNASE1,PLA2G2A,TF,RAB1A,CPS1,C4B,CFB,VIM,IGHD,IGHV3-72,NOTCH1
GO Process	GO:0034369	Plasma lipoprotein particle remodeling	8	29	1.3	6.57e-06	9606.ENSP00000200676,9606.ENSP00000227667,9606.ENSP00000233242,9606.ENSP00000236850,9606.ENSP00000355627,9606.ENSP00000383364,9606.ENSP00000417138,9606.ENSP00000466775	CETP,APOC3,APOB,APOA1,AGT,PLA2G2A,PLTP,APOC2
GO Process	GO:0060627	Regulation of vesicle-mediated transport	27	551	0.55	6.65e-06	9606.ENSP00000207549,9606.ENSP00000226218,9606.ENSP00000227667,9606.ENSP00000236850,9606.ENSP00000245907,9606.ENSP00000263025,9606.ENSP00000263710,9606.ENSP00000284981,9606.ENSP00000288266,9606.ENSP00000291744,9606.ENSP00000294964,9606.ENSP00000299367,9606.ENSP00000302486,9606.ENSP00000312999,9606.ENSP00000315130,9606.ENSP00000316779,9606.ENSP00000320866,9606.ENSP00000360871,9606.ENSP00000366109,…	UNC13D,VTN,APOC3,APOA1,C3,MAPK3,CLASP1,APP,APPL1,FCN2,PKDCC,C2,MAP2K1,GNAI2,CLU,BIN1,CALR,FCN1,ANXA1,NSF,TF,PTPRC,C4B,CFB,ITGB3,APOC2,NOTCH1
GO Process	GO:2000147	Positive regulation of cell motility	27	555	0.54	7.56e-06	9606.ENSP00000217407,9606.ENSP00000222399,9606.ENSP00000225655,9606.ENSP00000226218,9606.ENSP00000230036,9606.ENSP00000252590,9606.ENSP00000260356,9606.ENSP00000263025,9606.ENSP00000263710,9606.ENSP00000271638,9606.ENSP00000279227,9606.ENSP00000284981,9606.ENSP00000311713,9606.ENSP00000312999,9606.ENSP00000320866,9606.ENSP00000321108,9606.ENSP00000355627,9606.ENSP00000364709,9606.ENSP00000366109,…	LBP,LAMB1,PFN1,VTN,GPLD1,PLVAP,THBS1,MAPK3,CLASP1,S100A11,FERMT3,APP,OXSR1,GNAI2,CALR,SPOCK2,AGT,F10,ANXA1,PDCD10,CXCL12,TF,RELN,PTPRC,PIK3CG,ITGB3,NOTCH1
GO Process	GO:0071825	Protein-lipid complex subunit organization	9	45	1.16	9.41e-06	9606.ENSP00000200676,9606.ENSP00000227667,9606.ENSP00000233242,9606.ENSP00000236850,9606.ENSP00000316779,9606.ENSP00000355627,9606.ENSP00000383364,9606.ENSP00000417138,9606.ENSP00000466775	CETP,APOC3,APOB,APOA1,BIN1,AGT,PLA2G2A,PLTP,APOC2
GO Process	GO:0032502	Developmental process	121	5657	0.19	9.7e-06	9606.ENSP00000167586,9606.ENSP00000207549,9606.ENSP00000212355,9606.ENSP00000222271,9606.ENSP00000222399,9606.ENSP00000223642,9606.ENSP00000225655,9606.ENSP00000226218,9606.ENSP00000230036,9606.ENSP00000232003,9606.ENSP00000233242,9606.ENSP00000236850,9606.ENSP00000241052,9606.ENSP00000245907,9606.ENSP00000246635,9606.ENSP00000247461,9606.ENSP00000252242,9606.ENSP00000252244,9606.ENSP00000252590,…	KRT14,UNC13D,TGFBR3,COMP,LAMB1,C5,PFN1,VTN,GPLD1,HRG,APOB,APOA1,CAT,C3,KRT13,CANX,KRT5,KRT1,PLVAP,PXDN,NOTCH2,LAMC1,THBS1,AARS1,ITGA2B,SLC4A1,PRDX1,MAPK3,NOTCH3,NID1,TNC,IQGAP1,CDH11,KRT10,MYL9,FERMT3,APP,PKDCC,COL6A3,PRDX3,PRDX2,MAP2K1,LRG1,HOOK3,NPTX1,EFEMP2,KRT2,C1QB,PAK2,CLU,BIN1,NCL,CALR,SPOCK2,A2M,COL12A1,FLNC,KRT7,MGAT1,SERPINA5,ANG,KRT77,RPL22,ADAMTSL2,DNM3,SPTBN1,COL18A1,DCTN1,KRT19,COL6…
GO Process	GO:0065007	Biological regulation	214	12385	0.09	1.01e-05	9606.ENSP00000012443,9606.ENSP00000200676,9606.ENSP00000205948,9606.ENSP00000207549,9606.ENSP00000212355,9606.ENSP00000215727,9606.ENSP00000217407,9606.ENSP00000218099,9606.ENSP00000222271,9606.ENSP00000222381,9606.ENSP00000222399,9606.ENSP00000223061,9606.ENSP00000223357,9606.ENSP00000223642,9606.ENSP00000225655,9606.ENSP00000226218,9606.ENSP00000226355,9606.ENSP00000227667,9606.ENSP00000229268,…	PPP5C,CETP,APOH,UNC13D,TGFBR3,SERPIND1,LBP,F9,COMP,PON1,LAMB1,PCOLCE,AEBP1,C5,PFN1,VTN,AFM,APOC3,USP5,GPLD1,HRG,APOB,APOA1,CAT,C3,KRT13,KRT5,KRT1,PLVAP,PXDN,BPIFB1,F12,APCS,NOTCH2,DSG1,FHOD1,LAMC1,ORM1,THBS1,VWF,AARS1,ELOB,ITGA2B,SLC4A1,PRDX1,LGALS3BP,MAPK3,NOTCH3,C9,CLASP1,NID1,CP,TNC,PRDX5,HPX,LUM,IQGAP1,CDH11,KRT10,S100A11,ITIH1,MYL9,FERMT3,APP,STOM,APPL1,KPNB1,FCN2,AZGP1,PKDCC,COL6A3,CAMP,PRD…
GO Process	GO:1900047	Negative regulation of hemostasis	9	47	1.14	1.23e-05	9606.ENSP00000205948,9606.ENSP00000222271,9606.ENSP00000226218,9606.ENSP00000232003,9606.ENSP00000252244,9606.ENSP00000253496,9606.ENSP00000308541,9606.ENSP00000377783,9606.ENSP00000493985	APOH,COMP,VTN,HRG,KRT1,F12,F2,PROS1,KNG1
GO Process	GO:0051128	Regulation of cellular component organization	65	2365	0.3	1.32e-05	9606.ENSP00000222399,9606.ENSP00000223357,9606.ENSP00000225655,9606.ENSP00000226218,9606.ENSP00000227667,9606.ENSP00000232003,9606.ENSP00000236850,9606.ENSP00000245907,9606.ENSP00000256646,9606.ENSP00000258201,9606.ENSP00000258341,9606.ENSP00000260356,9606.ENSP00000263025,9606.ENSP00000263710,9606.ENSP00000264187,9606.ENSP00000265131,9606.ENSP00000268182,9606.ENSP00000284981,9606.ENSP00000288266,…	LAMB1,AEBP1,PFN1,VTN,APOC3,HRG,APOA1,C3,NOTCH2,FHOD1,LAMC1,THBS1,MAPK3,CLASP1,NID1,TNC,IQGAP1,APP,APPL1,MAP2K1,TWF2,NPTX1,F2,EFEMP2,LTBP4,PAK2,CLU,TLN1,BIN1,CALR,EHD3,CORO1B,DNM3,DYNC1H1,SPTBN1,DCTN1,AGT,LMNA,COL5A1,HSPG2,ANXA1,CLSTN1,AHNAK,RPS6KA3,PTPRD,FSCN1,XRCC5,PDCD10,CXCL12,LCP1,TF,RELN,CORO1C,GSPT1,PRNP,TNXB,VIM,ITGB3,APOC2,PTPRS,SPTAN1,PTPN11,HNRNPU,ENO1,NOTCH1
GO Process	GO:2000145	Regulation of cell motility	37	988	0.43	1.36e-05	9606.ENSP00000205948,9606.ENSP00000217407,9606.ENSP00000222399,9606.ENSP00000223642,9606.ENSP00000225655,9606.ENSP00000226218,9606.ENSP00000230036,9606.ENSP00000232003,9606.ENSP00000252242,9606.ENSP00000252590,9606.ENSP00000260356,9606.ENSP00000263025,9606.ENSP00000263710,9606.ENSP00000265131,9606.ENSP00000271638,9606.ENSP00000279227,9606.ENSP00000284981,9606.ENSP00000288266,9606.ENSP00000311713,…	APOH,LBP,LAMB1,C5,PFN1,VTN,GPLD1,HRG,KRT5,PLVAP,THBS1,MAPK3,CLASP1,TNC,S100A11,FERMT3,APP,APPL1,OXSR1,GNAI2,CALR,SPOCK2,CORO1B,AGT,LMNA,F10,ANXA1,PDCD10,CXCL12,TF,RELN,CORO1C,PTPRC,PIK3CG,FBN2,ITGB3,NOTCH1
GO Process	GO:0065009	Regulation of molecular function	78	3085	0.26	1.36e-05	9606.ENSP00000205948,9606.ENSP00000212355,9606.ENSP00000215727,9606.ENSP00000222381,9606.ENSP00000223061,9606.ENSP00000223642,9606.ENSP00000225655,9606.ENSP00000226218,9606.ENSP00000227667,9606.ENSP00000230036,9606.ENSP00000232003,9606.ENSP00000236850,9606.ENSP00000241052,9606.ENSP00000245907,9606.ENSP00000252804,9606.ENSP00000255040,9606.ENSP00000260356,9606.ENSP00000262418,9606.ENSP00000263025,…	APOH,TGFBR3,SERPIND1,PON1,PCOLCE,C5,PFN1,VTN,APOC3,GPLD1,HRG,APOA1,CAT,C3,PXDN,APCS,THBS1,SLC4A1,MAPK3,PRDX5,IQGAP1,ITIH1,APP,STOM,COL6A3,PRDX3,PRDX2,MAP2K1,NPTX1,F2,PSMD1,OXSR1,GNAI2,PAK2,CLU,BIN1,CPN2,SPOCK2,A2M,EHD3,SERPINA5,ANG,SERPINA6,CACNA2D1,ITIH2,AGT,ATP1B1,NIBAN2,ANXA1,AHNAK,RPS6KA3,IPO7,SERPINB12,SERPINB5,XRCC5,PDCD10,PROS1,GAPDH,PSMD14,PPP1R12A,RELN,CORO1C,PRNP,TNXB,PTPRC,C4B,SERPINA1…
GO Process	GO:1903035	Negative regulation of response to wounding	11	85	0.97	1.5e-05	9606.ENSP00000205948,9606.ENSP00000226218,9606.ENSP00000232003,9606.ENSP00000252244,9606.ENSP00000253496,9606.ENSP00000255040,9606.ENSP00000263710,9606.ENSP00000308541,9606.ENSP00000377783,9606.ENSP00000467537,9606.ENSP00000493985	APOH,VTN,HRG,KRT1,F12,APCS,CLASP1,F2,PROS1,PTPRS,KNG1
GO Process	GO:0061041	Regulation of wound healing	13	130	0.86	1.6e-05	9606.ENSP00000205948,9606.ENSP00000226218,9606.ENSP00000232003,9606.ENSP00000252244,9606.ENSP00000253496,9606.ENSP00000255040,9606.ENSP00000260356,9606.ENSP00000263710,9606.ENSP00000301522,9606.ENSP00000308541,9606.ENSP00000366109,9606.ENSP00000377783,9606.ENSP00000493985	APOH,VTN,HRG,KRT1,F12,APCS,THBS1,CLASP1,PRDX2,F2,ANXA1,PROS1,KNG1
GO Process	GO:0007010	Cytoskeleton organization	42	1229	0.39	1.8e-05	9606.ENSP00000167586,9606.ENSP00000217133,9606.ENSP00000225655,9606.ENSP00000246635,9606.ENSP00000252242,9606.ENSP00000252244,9606.ENSP00000258201,9606.ENSP00000263710,9606.ENSP00000279022,9606.ENSP00000290158,9606.ENSP00000303908,9606.ENSP00000305699,9606.ENSP00000310861,9606.ENSP00000316029,9606.ENSP00000316779,9606.ENSP00000320866,9606.ENSP00000327145,9606.ENSP00000329243,9606.ENSP00000336762,…	KRT14,TUBB1,PFN1,KRT13,KRT5,KRT1,FHOD1,CLASP1,MYL9,KPNB1,TWF2,HOOK3,KRT2,TLN1,BIN1,CALR,FLNC,KRT7,ANG,CORO1B,KRT77,DYNC1H1,SPTBN1,DCTN1,KRT19,LMNA,ANXA1,DSP,KRT6A,FSCN1,KRT18,GAPDH,LCP1,TF,PSTPIP2,PPP1R12A,CORO1C,TNXB,FLNB,VIM,TTN,SPTAN1
GO Process	GO:0051049	Regulation of transport	53	1763	0.33	1.8e-05	9606.ENSP00000200676,9606.ENSP00000207549,9606.ENSP00000222381,9606.ENSP00000226218,9606.ENSP00000227667,9606.ENSP00000230036,9606.ENSP00000236850,9606.ENSP00000245907,9606.ENSP00000260356,9606.ENSP00000263025,9606.ENSP00000263710,9606.ENSP00000284981,9606.ENSP00000286713,9606.ENSP00000288266,9606.ENSP00000291744,9606.ENSP00000294964,9606.ENSP00000299367,9606.ENSP00000302486,9606.ENSP00000308541,…	CETP,UNC13D,PON1,VTN,APOC3,GPLD1,APOA1,C3,THBS1,MAPK3,CLASP1,APP,STOM,APPL1,FCN2,PKDCC,C2,MAP2K1,F2,OXSR1,GNAI2,CLU,BIN1,CALR,EHD3,ANG,DNM3,DYNC1H1,CACNA2D1,AGT,ATP1B1,FCN1,ANXA1,AHNAK,C1QTNF3,PDCD10,CXCL12,NSF,LCP1,TF,PPP1R12A,RELN,PRNP,PTPRC,C4B,CFB,PLTP,PIK3CG,ITGB3,APOC2,TTN,PTPN11,NOTCH1
GO Process	GO:0009653	Anatomical structure morphogenesis	62	2229	0.3	1.8e-05	9606.ENSP00000207549,9606.ENSP00000212355,9606.ENSP00000222271,9606.ENSP00000222399,9606.ENSP00000225655,9606.ENSP00000226218,9606.ENSP00000230036,9606.ENSP00000232003,9606.ENSP00000233242,9606.ENSP00000252804,9606.ENSP00000256646,9606.ENSP00000258341,9606.ENSP00000260356,9606.ENSP00000262407,9606.ENSP00000263025,9606.ENSP00000263388,9606.ENSP00000265131,9606.ENSP00000268182,9606.ENSP00000268603,…	UNC13D,TGFBR3,COMP,LAMB1,PFN1,VTN,GPLD1,HRG,APOB,PXDN,NOTCH2,LAMC1,THBS1,ITGA2B,MAPK3,NOTCH3,TNC,IQGAP1,CDH11,KRT10,MYL9,FERMT3,APP,PKDCC,MAP2K1,LRG1,NPTX1,EFEMP2,CLU,NCL,COL12A1,FLNC,ANG,SPTBN1,COL18A1,KRT19,COL6A1,THBS3,COL5A1,NIBAN2,MATN1,SVEP1,HSPG2,DSP,KRT6A,SERPINB5,FLG2,KRT18,STAB2,PDCD10,EFEMP1,CXCL12,RAB1A,RELN,PIK3CG,FLNB,FBN2,ITGB3,TTN,PTPN11,MTHFD1,NOTCH1
GO Process	GO:0050789	Regulation of biological process	204	11655	0.1	1.8e-05	9606.ENSP00000012443,9606.ENSP00000200676,9606.ENSP00000205948,9606.ENSP00000207549,9606.ENSP00000212355,9606.ENSP00000215727,9606.ENSP00000217407,9606.ENSP00000222271,9606.ENSP00000222381,9606.ENSP00000222399,9606.ENSP00000223061,9606.ENSP00000223357,9606.ENSP00000223642,9606.ENSP00000225655,9606.ENSP00000226218,9606.ENSP00000227667,9606.ENSP00000229268,9606.ENSP00000230036,9606.ENSP00000232003,…	PPP5C,CETP,APOH,UNC13D,TGFBR3,SERPIND1,LBP,COMP,PON1,LAMB1,PCOLCE,AEBP1,C5,PFN1,VTN,APOC3,USP5,GPLD1,HRG,APOB,APOA1,CAT,C3,KRT13,KRT5,KRT1,PLVAP,PXDN,BPIFB1,F12,APCS,NOTCH2,FHOD1,LAMC1,ORM1,THBS1,VWF,AARS1,ELOB,ITGA2B,SLC4A1,PRDX1,LGALS3BP,MAPK3,NOTCH3,C9,CLASP1,NID1,TNC,PRDX5,HPX,LUM,IQGAP1,CDH11,KRT10,S100A11,ITIH1,MYL9,FERMT3,APP,STOM,APPL1,KPNB1,FCN2,AZGP1,PKDCC,COL6A3,CAMP,PRDX3,C2,PRDX2,MAP…
GO Process	GO:0080134	Regulation of response to stress	45	1373	0.37	1.83e-05	9606.ENSP00000205948,9606.ENSP00000217407,9606.ENSP00000226218,9606.ENSP00000232003,9606.ENSP00000236850,9606.ENSP00000245907,9606.ENSP00000252244,9606.ENSP00000253496,9606.ENSP00000255040,9606.ENSP00000260356,9606.ENSP00000262746,9606.ENSP00000263025,9606.ENSP00000263710,9606.ENSP00000265131,9606.ENSP00000265983,9606.ENSP00000284981,9606.ENSP00000288266,9606.ENSP00000291744,9606.ENSP00000301522,…	APOH,LBP,VTN,HRG,APOA1,C3,KRT1,F12,APCS,THBS1,PRDX1,MAPK3,CLASP1,TNC,HPX,APP,APPL1,FCN2,PRDX2,MAP2K1,F2,PAK2,CLU,A2M,PCBP2,FH,AGT,CFH,LMNA,FCN1,ATF6B,ANXA1,C1QTNF3,XRCC5,PDCD10,PROS1,CXCL12,PLA2G2A,PTPRC,PIK3CG,OTUB1,PTPRS,PTPN11,KNG1,ENO1
GO Process	GO:0061045	Negative regulation of wound healing	10	69	1.02	2.09e-05	9606.ENSP00000205948,9606.ENSP00000226218,9606.ENSP00000232003,9606.ENSP00000252244,9606.ENSP00000253496,9606.ENSP00000255040,9606.ENSP00000263710,9606.ENSP00000308541,9606.ENSP00000377783,9606.ENSP00000493985	APOH,VTN,HRG,KRT1,F12,APCS,CLASP1,F2,PROS1,KNG1
GO Process	GO:0019835	Cytolysis	7	23	1.34	2.17e-05	9606.ENSP00000223642,9606.ENSP00000263408,9606.ENSP00000322061,9606.ENSP00000354458,9606.ENSP00000360281,9606.ENSP00000360697,9606.ENSP00000383364	C5,C9,C7,C8A,C8B,C8G,PLA2G2A
GO Process	GO:0030193	Regulation of blood coagulation	10	70	1.01	2.32e-05	9606.ENSP00000205948,9606.ENSP00000226218,9606.ENSP00000232003,9606.ENSP00000252244,9606.ENSP00000253496,9606.ENSP00000260356,9606.ENSP00000301522,9606.ENSP00000308541,9606.ENSP00000377783,9606.ENSP00000493985	APOH,VTN,HRG,KRT1,F12,THBS1,PRDX2,F2,PROS1,KNG1
GO Process	GO:0030334	Regulation of cell migration	35	927	0.43	2.32e-05	9606.ENSP00000205948,9606.ENSP00000217407,9606.ENSP00000222399,9606.ENSP00000223642,9606.ENSP00000225655,9606.ENSP00000226218,9606.ENSP00000230036,9606.ENSP00000232003,9606.ENSP00000252242,9606.ENSP00000252590,9606.ENSP00000260356,9606.ENSP00000263025,9606.ENSP00000263710,9606.ENSP00000265131,9606.ENSP00000271638,9606.ENSP00000279227,9606.ENSP00000284981,9606.ENSP00000288266,9606.ENSP00000311713,…	APOH,LBP,LAMB1,C5,PFN1,VTN,GPLD1,HRG,KRT5,PLVAP,THBS1,MAPK3,CLASP1,TNC,S100A11,FERMT3,APP,APPL1,OXSR1,GNAI2,CALR,CORO1B,AGT,LMNA,F10,ANXA1,PDCD10,CXCL12,RELN,CORO1C,PTPRC,PIK3CG,FBN2,ITGB3,NOTCH1
GO Process	GO:0048519	Negative regulation of biological process	114	5313	0.19	2.35e-05	9606.ENSP00000200676,9606.ENSP00000205948,9606.ENSP00000212355,9606.ENSP00000215727,9606.ENSP00000217407,9606.ENSP00000222271,9606.ENSP00000223357,9606.ENSP00000223642,9606.ENSP00000225655,9606.ENSP00000226218,9606.ENSP00000227667,9606.ENSP00000230036,9606.ENSP00000232003,9606.ENSP00000236850,9606.ENSP00000241052,9606.ENSP00000245907,9606.ENSP00000252244,9606.ENSP00000252804,9606.ENSP00000253354,…	CETP,APOH,TGFBR3,SERPIND1,LBP,COMP,AEBP1,C5,PFN1,VTN,APOC3,GPLD1,HRG,APOA1,CAT,C3,KRT1,PXDN,BPIFB1,F12,APCS,NOTCH2,ORM1,THBS1,AARS1,SLC4A1,NOTCH3,CLASP1,PRDX5,IQGAP1,S100A11,ITIH1,APP,APPL1,AZGP1,PKDCC,COL6A3,PRDX3,PRDX2,MAP2K1,TWF2,HOOK3,F2,EFEMP2,OXSR1,STAB1,GNAI2,PAK2,CLU,BIN1,NCL,CALR,SPOCK2,A2M,SERPINA5,ANG,CORO1B,SERPINA6,ADAMTSL2,DNM3,SPTBN1,ITIH2,NAE1,PCBP2,COL18A1,FH,AGT,NIBAN1,LMNA,FCN1…
GO Process	GO:0032879	Regulation of localization	59	2103	0.3	2.72e-05	9606.ENSP00000200676,9606.ENSP00000207549,9606.ENSP00000222381,9606.ENSP00000226218,9606.ENSP00000227667,9606.ENSP00000230036,9606.ENSP00000233242,9606.ENSP00000236850,9606.ENSP00000245907,9606.ENSP00000252242,9606.ENSP00000260356,9606.ENSP00000263025,9606.ENSP00000263710,9606.ENSP00000284981,9606.ENSP00000286713,9606.ENSP00000288266,9606.ENSP00000291744,9606.ENSP00000294964,9606.ENSP00000299367,…	CETP,UNC13D,PON1,VTN,APOC3,GPLD1,APOB,APOA1,C3,KRT5,THBS1,MAPK3,CLASP1,APP,STOM,APPL1,FCN2,PKDCC,C2,MAP2K1,F2,OXSR1,GNAI2,CLU,BIN1,CALR,EHD3,ANG,DNM3,DYNC1H1,SPTBN1,CACNA2D1,AGT,ATP1B1,LMNA,FCN1,ANXA1,AHNAK,C1QTNF3,PDCD10,CXCL12,NSF,LCP1,TF,PPP1R12A,RELN,PRNP,PTPRC,C4B,CFB,PLTP,PIK3CG,ITGB3,APOC2,TTN,APOC4,PTPN11,HNRNPU,NOTCH1
GO Process	GO:0050790	Regulation of catalytic activity	64	2370	0.29	2.72e-05	9606.ENSP00000205948,9606.ENSP00000215727,9606.ENSP00000223061,9606.ENSP00000223642,9606.ENSP00000226218,9606.ENSP00000227667,9606.ENSP00000230036,9606.ENSP00000232003,9606.ENSP00000236850,9606.ENSP00000245907,9606.ENSP00000255040,9606.ENSP00000260356,9606.ENSP00000262418,9606.ENSP00000263025,9606.ENSP00000265462,9606.ENSP00000268182,9606.ENSP00000273283,9606.ENSP00000284981,9606.ENSP00000295550,…	APOH,SERPIND1,PCOLCE,C5,VTN,APOC3,GPLD1,HRG,APOA1,C3,APCS,THBS1,SLC4A1,MAPK3,PRDX5,IQGAP1,ITIH1,APP,COL6A3,PRDX3,MAP2K1,F2,PSMD1,GNAI2,PAK2,CLU,BIN1,CPN2,SPOCK2,A2M,SERPINA5,ANG,SERPINA6,ITIH2,AGT,ANXA1,RPS6KA3,IPO7,SERPINB12,SERPINB5,XRCC5,PDCD10,PROS1,GAPDH,PSMD14,PPP1R12A,RELN,CORO1C,PRNP,TNXB,PTPRC,C4B,SERPINA1,PIK3CG,SERPINA3,ITGB3,APOC2,TTN,CCL14,CCL18,HNRNPU,KNG1,NOTCH1,SNX6
GO Process	GO:0048646	Anatomical structure formation involved in morphogenesis	35	938	0.43	2.92e-05	9606.ENSP00000207549,9606.ENSP00000212355,9606.ENSP00000222399,9606.ENSP00000225655,9606.ENSP00000226218,9606.ENSP00000230036,9606.ENSP00000232003,9606.ENSP00000252804,9606.ENSP00000256646,9606.ENSP00000260356,9606.ENSP00000262407,9606.ENSP00000263025,9606.ENSP00000263388,9606.ENSP00000279022,9606.ENSP00000302486,9606.ENSP00000318195,9606.ENSP00000325146,9606.ENSP00000327145,9606.ENSP00000336762,…	UNC13D,TGFBR3,LAMB1,PFN1,VTN,GPLD1,HRG,PXDN,NOTCH2,THBS1,ITGA2B,MAPK3,NOTCH3,MYL9,MAP2K1,NCL,COL12A1,FLNC,ANG,SPTBN1,COL18A1,KRT19,COL6A1,THBS3,HSPG2,STAB2,PDCD10,RELN,PIK3CG,FBN2,ITGB3,TTN,PTPN11,MTHFD1,NOTCH1
GO Process	GO:0030335	Positive regulation of cell migration	25	529	0.53	3.16e-05	9606.ENSP00000217407,9606.ENSP00000222399,9606.ENSP00000225655,9606.ENSP00000226218,9606.ENSP00000230036,9606.ENSP00000252590,9606.ENSP00000260356,9606.ENSP00000263025,9606.ENSP00000263710,9606.ENSP00000271638,9606.ENSP00000279227,9606.ENSP00000284981,9606.ENSP00000311713,9606.ENSP00000312999,9606.ENSP00000320866,9606.ENSP00000355627,9606.ENSP00000364709,9606.ENSP00000366109,9606.ENSP00000376506,…	LBP,LAMB1,PFN1,VTN,GPLD1,PLVAP,THBS1,MAPK3,CLASP1,S100A11,FERMT3,APP,OXSR1,GNAI2,CALR,AGT,F10,ANXA1,PDCD10,CXCL12,RELN,PTPRC,PIK3CG,ITGB3,NOTCH1
GO Process	GO:0042744	Hydrogen peroxide catabolic process	7	25	1.3	3.19e-05	9606.ENSP00000241052,9606.ENSP00000252804,9606.ENSP00000262746,9606.ENSP00000265462,9606.ENSP00000298510,9606.ENSP00000301522,9606.ENSP00000494175	CAT,PXDN,PRDX1,PRDX5,PRDX3,PRDX2,HBB
GO Process	GO:0042592	Homeostatic process	45	1406	0.36	3.19e-05	9606.ENSP00000200676,9606.ENSP00000212355,9606.ENSP00000222271,9606.ENSP00000227667,9606.ENSP00000233242,9606.ENSP00000236850,9606.ENSP00000252244,9606.ENSP00000258341,9606.ENSP00000262418,9606.ENSP00000262746,9606.ENSP00000263025,9606.ENSP00000264613,9606.ENSP00000265462,9606.ENSP00000265983,9606.ENSP00000284981,9606.ENSP00000292401,9606.ENSP00000298510,9606.ENSP00000301522,9606.ENSP00000307549,…	CETP,TGFBR3,COMP,APOC3,APOB,APOA1,KRT1,LAMC1,SLC4A1,PRDX1,MAPK3,CP,PRDX5,HPX,APP,AZGP1,PRDX3,PRDX2,NPTX1,F2,CALR,ANG,DCTN1,FH,AGT,ATP1B1,ANXA1,C1QTNF3,FLG2,CXCL12,PLA2G2A,TF,RPS14,PRNP,CPS1,FBN2,ATP1A3,SERPINA3,APOC2,APOC4,CCL14,PTPN11,MTHFD1,NOTCH1,AMPD2
GO Process	GO:0032102	Negative regulation of response to external stimulus	21	387	0.59	3.55e-05	9606.ENSP00000205948,9606.ENSP00000223642,9606.ENSP00000226218,9606.ENSP00000232003,9606.ENSP00000236850,9606.ENSP00000252244,9606.ENSP00000253496,9606.ENSP00000255040,9606.ENSP00000260356,9606.ENSP00000263710,9606.ENSP00000301522,9606.ENSP00000308541,9606.ENSP00000323929,9606.ENSP00000340211,9606.ENSP00000352438,9606.ENSP00000371497,9606.ENSP00000377783,9606.ENSP00000411355,9606.ENSP00000467537,…	APOH,C5,VTN,HRG,APOA1,KRT1,F12,APCS,THBS1,CLASP1,PRDX2,F2,A2M,CORO1B,PCBP2,C1QTNF3,PROS1,PTPRC,PTPRS,KNG1,NOTCH1
GO Process	GO:0002250	Adaptive immune response	20	359	0.6	4.59e-05	9606.ENSP00000207549,9606.ENSP00000223642,9606.ENSP00000245907,9606.ENSP00000263408,9606.ENSP00000299367,9606.ENSP00000313967,9606.ENSP00000315130,9606.ENSP00000322061,9606.ENSP00000354458,9606.ENSP00000360281,9606.ENSP00000360697,9606.ENSP00000363770,9606.ENSP00000366109,9606.ENSP00000415941,9606.ENSP00000419260,9606.ENSP00000444271,9606.ENSP00000444357,9606.ENSP00000478893,9606.ENSP00000480035,…	UNC13D,C5,C3,C9,C2,C1QB,CLU,C7,C8A,C8B,C8G,C1QC,ANXA1,C4B,PIK3CG,C1R,OTUB1,IGHD,IGHV3-72,NOTCH1
GO Process	GO:0048522	Positive regulation of cellular process	117	5584	0.18	4.72e-05	9606.ENSP00000012443,9606.ENSP00000207549,9606.ENSP00000212355,9606.ENSP00000217407,9606.ENSP00000222271,9606.ENSP00000222399,9606.ENSP00000225655,9606.ENSP00000226218,9606.ENSP00000229268,9606.ENSP00000230036,9606.ENSP00000232003,9606.ENSP00000233242,9606.ENSP00000236850,9606.ENSP00000241052,9606.ENSP00000245907,9606.ENSP00000252590,9606.ENSP00000256646,9606.ENSP00000258201,9606.ENSP00000258341,…	PPP5C,UNC13D,TGFBR3,LBP,COMP,LAMB1,PFN1,VTN,USP5,GPLD1,HRG,APOB,APOA1,CAT,C3,PLVAP,NOTCH2,FHOD1,LAMC1,THBS1,VWF,ELOB,MAPK3,NOTCH3,CLASP1,NID1,TNC,HPX,LUM,IQGAP1,S100A11,FERMT3,APP,STOM,APPL1,FCN2,PKDCC,CAMP,PRDX3,C2,PRDX2,MAP2K1,LRG1,TWF2,F2,EFEMP2,OXSR1,GNAI2,PAK2,CLU,BIN1,NCL,CALR,SPOCK2,EHD3,ANG,CORO1B,DNM3,DYNC1H1,SPTBN1,CACNA2D1,PCBP2,DCTN1,FH,AGT,NIBAN1,ATP1B1,LMNA,ADAMTSL4,FCN1,NIBAN2,ATF6…
GO Process	GO:0010628	Positive regulation of gene expression	39	1146	0.39	4.95e-05	9606.ENSP00000217407,9606.ENSP00000223642,9606.ENSP00000233242,9606.ENSP00000245907,9606.ENSP00000253496,9606.ENSP00000259396,9606.ENSP00000260356,9606.ENSP00000263025,9606.ENSP00000265131,9606.ENSP00000265983,9606.ENSP00000266718,9606.ENSP00000284981,9606.ENSP00000288266,9606.ENSP00000296435,9606.ENSP00000302486,9606.ENSP00000315130,9606.ENSP00000318195,9606.ENSP00000320866,9606.ENSP00000349259,…	LBP,C5,APOB,C3,F12,ORM1,THBS1,MAPK3,TNC,HPX,LUM,APP,APPL1,CAMP,MAP2K1,CLU,NCL,CALR,SPTBN1,AGT,NIBAN1,LMNA,FUBP1,FCN1,ANXA1,C1QTNF3,PDCD10,GAPDH,RAB1A,PTPRC,PIK3CG,VIM,ITGB3,TTN,IGHD,PTPN11,HNRNPU,ENO1,NOTCH1
GO Process	GO:1903028	Positive regulation of opsonization	6	16	1.43	5.48e-05	9606.ENSP00000245907,9606.ENSP00000291744,9606.ENSP00000299367,9606.ENSP00000360871,9606.ENSP00000415941,9606.ENSP00000416561	C3,FCN2,C2,FCN1,C4B,CFB
GO Process	GO:0030194	Positive regulation of blood coagulation	7	28	1.25	5.69e-05	9606.ENSP00000205948,9606.ENSP00000226218,9606.ENSP00000232003,9606.ENSP00000253496,9606.ENSP00000260356,9606.ENSP00000301522,9606.ENSP00000308541	APOH,VTN,HRG,F12,THBS1,PRDX2,F2
GO Process	GO:0030195	Negative regulation of blood coagulation	8	46	1.1	9.23e-05	9606.ENSP00000205948,9606.ENSP00000226218,9606.ENSP00000232003,9606.ENSP00000252244,9606.ENSP00000253496,9606.ENSP00000308541,9606.ENSP00000377783,9606.ENSP00000493985	APOH,VTN,HRG,KRT1,F12,F2,PROS1,KNG1
GO Process	GO:0051917	Regulation of fibrinolysis	6	18	1.38	9.25e-05	9606.ENSP00000205948,9606.ENSP00000226218,9606.ENSP00000232003,9606.ENSP00000253496,9606.ENSP00000260356,9606.ENSP00000308541	APOH,VTN,HRG,F12,THBS1,F2
GO Process	GO:0010033	Response to organic substance	68	2692	0.26	9.58e-05	9606.ENSP00000012443,9606.ENSP00000212355,9606.ENSP00000217407,9606.ENSP00000222271,9606.ENSP00000222381,9606.ENSP00000230036,9606.ENSP00000233242,9606.ENSP00000241052,9606.ENSP00000247461,9606.ENSP00000252590,9606.ENSP00000253496,9606.ENSP00000256646,9606.ENSP00000257192,9606.ENSP00000260356,9606.ENSP00000263025,9606.ENSP00000265983,9606.ENSP00000268182,9606.ENSP00000284981,9606.ENSP00000288266,…	PPP5C,TGFBR3,LBP,COMP,PON1,GPLD1,APOB,CAT,CANX,PLVAP,F12,NOTCH2,DSG1,THBS1,MAPK3,HPX,IQGAP1,APP,APPL1,CAMP,PRDX3,COL6A2,PRDX2,HSPA4,TWF2,NPTX1,OXSR1,LTBP4,GNAI2,PAK2,CLU,NCL,CALR,SPOCK2,A2M,ANG,PKLR,CORO1B,CACNA2D1,KRT19,COL6A1,AGT,ATF6B,ANXA1,RPS6KA3,POSTN,PFKP,KRT18,SSC5D,XRCC5,PDCD10,CXCL12,GAPDH,PSMD14,PRNP,CPS1,C4B,PIK3CG,FLNB,ATP1A3,VIM,ITGB3,CCL14,CCL18,PTPN11,HNRNPU,NOTCH1,SNX6
GO Process	GO:0009987	Cellular process	239	14826	0.06	0.0001	9606.ENSP00000012443,9606.ENSP00000167586,9606.ENSP00000200676,9606.ENSP00000205948,9606.ENSP00000207549,9606.ENSP00000212355,9606.ENSP00000217133,9606.ENSP00000217407,9606.ENSP00000222271,9606.ENSP00000222381,9606.ENSP00000222399,9606.ENSP00000223642,9606.ENSP00000225655,9606.ENSP00000226218,9606.ENSP00000226355,9606.ENSP00000227667,9606.ENSP00000229268,9606.ENSP00000230036,9606.ENSP00000232003,…	PPP5C,KRT14,CETP,APOH,UNC13D,TGFBR3,TUBB1,LBP,COMP,PON1,LAMB1,C5,PFN1,VTN,AFM,APOC3,USP5,GPLD1,HRG,APOB,APOA1,CAT,PEPD,C3,UROD,KRT13,CANX,KRT5,KRT1,PLVAP,PXDN,ACSS2,MATN2,APCS,NOTCH2,DSG1,FHOD1,LAMC1,THBS1,VWF,AARS1,ELOB,ITGA2B,SLC4A1,PRDX1,LGALS3BP,MAPK3,NOTCH3,C9,CLASP1,NID1,CP,TNC,PRDX5,HPX,LUM,IQGAP1,CDH11,KRT10,PGD,S100A11,ALDH1L1,HABP2,MYL9,FERMT3,APP,APPL1,KPNB1,FCN2,AZGP1,PKDCC,COL6A3,CAM…
GO Process	GO:1901564	Organonitrogen compound metabolic process	106	4981	0.18	0.00011	9606.ENSP00000012443,9606.ENSP00000200676,9606.ENSP00000205948,9606.ENSP00000212355,9606.ENSP00000218099,9606.ENSP00000222271,9606.ENSP00000222381,9606.ENSP00000223061,9606.ENSP00000223357,9606.ENSP00000227667,9606.ENSP00000229268,9606.ENSP00000230036,9606.ENSP00000233242,9606.ENSP00000236850,9606.ENSP00000241052,9606.ENSP00000244137,9606.ENSP00000245907,9606.ENSP00000246337,9606.ENSP00000247461,…	PPP5C,CETP,APOH,TGFBR3,F9,COMP,PON1,PCOLCE,AEBP1,APOC3,USP5,GPLD1,APOB,APOA1,CAT,PEPD,C3,UROD,CANX,KRT1,PXDN,ACSS2,F12,THBS1,AARS1,ELOB,MAPK3,HPX,KRT10,ITIH1,ALDH1L1,HABP2,APP,FCN2,PKDCC,PRDX3,C2,MAP2K1,F2,PSMD1,KRT2,OXSR1,PAK2,CLU,APOL1,CALR,SPOCK2,HMGCS1,MGAT1,UBA1,PKLR,GANAB,RPL22,SPTBN1,GFPT1,ITIH2,CNDP1,NAE1,PCBP2,FH,CFH,ATP1B1,FCN1,PGK1,F10,PSAT1,ANXA1,RPS6KA3,DSP,PFKP,PTPRD,UROC1,GARS1,EFE…
GO Process	GO:0050793	Regulation of developmental process	64	2492	0.27	0.00013	9606.ENSP00000200676,9606.ENSP00000205948,9606.ENSP00000207549,9606.ENSP00000212355,9606.ENSP00000222271,9606.ENSP00000222399,9606.ENSP00000223642,9606.ENSP00000232003,9606.ENSP00000233242,9606.ENSP00000236850,9606.ENSP00000245907,9606.ENSP00000252244,9606.ENSP00000255040,9606.ENSP00000256646,9606.ENSP00000258341,9606.ENSP00000260356,9606.ENSP00000263388,9606.ENSP00000263710,9606.ENSP00000264187,…	CETP,APOH,UNC13D,TGFBR3,COMP,LAMB1,C5,HRG,APOB,APOA1,C3,KRT1,APCS,NOTCH2,LAMC1,THBS1,NOTCH3,CLASP1,NID1,KRT10,APP,PKDCC,CAMP,PRDX2,MAP2K1,LRG1,TWF2,HOOK3,F2,EFEMP2,KRT2,STAB1,PAK2,BIN1,CALR,SPOCK2,CORO1B,DNM3,AGT,COL5A1,NIBAN2,PGK1,MATN1,C1QC,HSPG2,ANXA1,CLSTN1,RPS6KA3,PTPRD,XRCC5,PDCD10,EFEMP1,CXCL12,PLA2G2A,RELN,CORO1C,TNXB,PTPRC,FBN2,ITGB3,PTPRS,PTPN11,HNRNPU,NOTCH1
GO Process	GO:0030216	Keratinocyte differentiation	12	138	0.8	0.00014	9606.ENSP00000252242,9606.ENSP00000252244,9606.ENSP00000269576,9606.ENSP00000302486,9606.ENSP00000310861,9606.ENSP00000329243,9606.ENSP00000342710,9606.ENSP00000366109,9606.ENSP00000369129,9606.ENSP00000369317,9606.ENSP00000420213,9606.ENSP00000498587	KRT5,KRT1,KRT10,MAP2K1,KRT2,KRT7,KRT77,ANXA1,DSP,KRT6A,FLNB,NOTCH1
GO Process	GO:1905952	Regulation of lipid localization	13	167	0.75	0.00016	9606.ENSP00000200676,9606.ENSP00000222381,9606.ENSP00000227667,9606.ENSP00000233242,9606.ENSP00000236850,9606.ENSP00000245907,9606.ENSP00000260356,9606.ENSP00000355627,9606.ENSP00000417138,9606.ENSP00000452786,9606.ENSP00000466775,9606.ENSP00000468236,9606.ENSP00000489597	CETP,PON1,APOC3,APOB,APOA1,C3,THBS1,AGT,PLTP,ITGB3,APOC2,APOC4,PTPN11
GO Process	GO:0072359	Circulatory system development	32	901	0.41	0.00023	9606.ENSP00000212355,9606.ENSP00000222271,9606.ENSP00000230036,9606.ENSP00000232003,9606.ENSP00000233242,9606.ENSP00000252804,9606.ENSP00000256646,9606.ENSP00000260356,9606.ENSP00000262407,9606.ENSP00000263025,9606.ENSP00000263388,9606.ENSP00000302486,9606.ENSP00000309953,9606.ENSP00000318195,9606.ENSP00000320866,9606.ENSP00000336762,9606.ENSP00000352798,9606.ENSP00000355627,9606.ENSP00000357283,…	TGFBR3,COMP,GPLD1,HRG,APOB,PXDN,NOTCH2,THBS1,ITGA2B,MAPK3,NOTCH3,MAP2K1,EFEMP2,NCL,CALR,ANG,COL18A1,AGT,LMNA,COL5A1,SVEP1,HSPG2,DSP,STAB2,PDCD10,PIK3CG,ITGB3,TTN,PTPN11,HNRNPU,MTHFD1,NOTCH1
GO Process	GO:0051094	Positive regulation of developmental process	41	1332	0.34	0.00025	9606.ENSP00000207549,9606.ENSP00000212355,9606.ENSP00000222399,9606.ENSP00000223642,9606.ENSP00000233242,9606.ENSP00000236850,9606.ENSP00000245907,9606.ENSP00000256646,9606.ENSP00000258341,9606.ENSP00000260356,9606.ENSP00000263710,9606.ENSP00000264187,9606.ENSP00000269576,9606.ENSP00000284981,9606.ENSP00000294964,9606.ENSP00000296435,9606.ENSP00000302486,9606.ENSP00000302621,9606.ENSP00000303908,…	UNC13D,TGFBR3,LAMB1,C5,APOB,APOA1,C3,NOTCH2,LAMC1,THBS1,CLASP1,NID1,KRT10,APP,PKDCC,CAMP,MAP2K1,LRG1,TWF2,EFEMP2,KRT2,BIN1,CALR,CORO1B,AGT,NIBAN2,ANXA1,CLSTN1,RPS6KA3,PTPRD,XRCC5,CXCL12,PLA2G2A,RELN,CORO1C,TNXB,PTPRC,FBN2,ITGB3,HNRNPU,NOTCH1
GO Process	GO:0018149	Peptide cross-linking	7	37	1.13	0.00026	9606.ENSP00000252244,9606.ENSP00000260356,9606.ENSP00000269576,9606.ENSP00000310861,9606.ENSP00000321108,9606.ENSP00000366109,9606.ENSP00000369129	KRT1,THBS1,KRT10,KRT2,SPOCK2,ANXA1,DSP
GO Process	GO:0030168	Platelet activation	10	97	0.87	0.00026	9606.ENSP00000222271,9606.ENSP00000232003,9606.ENSP00000261405,9606.ENSP00000279022,9606.ENSP00000279227,9606.ENSP00000308541,9606.ENSP00000316029,9606.ENSP00000419260,9606.ENSP00000452786,9606.ENSP00000494175	COMP,HRG,VWF,MYL9,FERMT3,F2,TLN1,PIK3CG,ITGB3,HBB
GO Process	GO:0006897	Endocytosis	21	447	0.53	0.00026	9606.ENSP00000226218,9606.ENSP00000247461,9606.ENSP00000260356,9606.ENSP00000262776,9606.ENSP00000263025,9606.ENSP00000284981,9606.ENSP00000291744,9606.ENSP00000312946,9606.ENSP00000316779,9606.ENSP00000327116,9606.ENSP00000330601,9606.ENSP00000347457,9606.ENSP00000360798,9606.ENSP00000360871,9606.ENSP00000363827,9606.ENSP00000373539,9606.ENSP00000374274,9606.ENSP00000387286,9606.ENSP00000419260,…	VTN,CANX,THBS1,LGALS3BP,MAPK3,APP,FCN2,STAB1,BIN1,EHD3,HHIPL1,DNM3,EPS15,FCN1,HSPG2,STAB2,SSC5D,RAB1A,PIK3CG,IGHD,IGHV3-72
GO Process	GO:0050766	Positive regulation of phagocytosis	9	75	0.94	0.00027	9606.ENSP00000236850,9606.ENSP00000245907,9606.ENSP00000291744,9606.ENSP00000299367,9606.ENSP00000320866,9606.ENSP00000360871,9606.ENSP00000411355,9606.ENSP00000415941,9606.ENSP00000416561	APOA1,C3,FCN2,C2,CALR,FCN1,PTPRC,C4B,CFB
GO Process	GO:0001944	Vasculature development	23	527	0.5	0.00028	9606.ENSP00000212355,9606.ENSP00000222271,9606.ENSP00000230036,9606.ENSP00000232003,9606.ENSP00000233242,9606.ENSP00000252804,9606.ENSP00000256646,9606.ENSP00000260356,9606.ENSP00000262407,9606.ENSP00000263388,9606.ENSP00000302486,9606.ENSP00000309953,9606.ENSP00000318195,9606.ENSP00000336762,9606.ENSP00000352798,9606.ENSP00000360882,9606.ENSP00000363593,9606.ENSP00000363827,9606.ENSP00000373539,…	TGFBR3,COMP,GPLD1,HRG,APOB,PXDN,NOTCH2,THBS1,ITGA2B,NOTCH3,MAP2K1,EFEMP2,NCL,ANG,COL18A1,COL5A1,SVEP1,HSPG2,STAB2,PDCD10,PIK3CG,ITGB3,NOTCH1
GO Process	GO:0048513	Animal organ development	76	3246	0.23	0.00028	9606.ENSP00000212355,9606.ENSP00000222271,9606.ENSP00000222399,9606.ENSP00000226218,9606.ENSP00000230036,9606.ENSP00000236850,9606.ENSP00000241052,9606.ENSP00000252242,9606.ENSP00000252244,9606.ENSP00000252804,9606.ENSP00000256646,9606.ENSP00000258341,9606.ENSP00000261772,9606.ENSP00000262418,9606.ENSP00000263025,9606.ENSP00000263388,9606.ENSP00000264187,9606.ENSP00000265131,9606.ENSP00000268182,…	TGFBR3,COMP,LAMB1,VTN,GPLD1,APOA1,CAT,KRT5,KRT1,PXDN,NOTCH2,LAMC1,AARS1,SLC4A1,MAPK3,NOTCH3,NID1,TNC,IQGAP1,KRT10,APP,PKDCC,COL6A3,PRDX3,PRDX2,MAP2K1,HOOK3,EFEMP2,KRT2,C1QB,CALR,A2M,KRT7,ANG,KRT77,RPL22,ADAMTSL2,COL18A1,DCTN1,KRT19,AGT,LMNA,THBS3,COL5A1,MINPP1,MATN1,HSPG2,ANXA1,DSP,KRT6A,SERPINB12,SERPINB5,FLG2,XRCC5,EFEMP1,CXCL12,LCP1,MATN3,TF,RPS14,RELN,CORO1C,CPS1,PTPRC,FLNB,FBN2,PGM3,ATP1A3,L…
GO Process	GO:0051838	Cytolysis by host of symbiont cells	5	12	1.48	0.00029	9606.ENSP00000232003,9606.ENSP00000296435,9606.ENSP00000308541,9606.ENSP00000317674,9606.ENSP00000369317	HRG,CAMP,F2,APOL1,KRT6A
GO Process	GO:0042742	Defense response to bacterium	17	306	0.6	0.00029	9606.ENSP00000217407,9606.ENSP00000256646,9606.ENSP00000284981,9606.ENSP00000291744,9606.ENSP00000296435,9606.ENSP00000308541,9606.ENSP00000312946,9606.ENSP00000336762,9606.ENSP00000369317,9606.ENSP00000373539,9606.ENSP00000374274,9606.ENSP00000381057,9606.ENSP00000383364,9606.ENSP00000385834,9606.ENSP00000387286,9606.ENSP00000478893,9606.ENSP00000480035	LBP,NOTCH2,APP,FCN2,CAMP,F2,STAB1,ANG,KRT6A,STAB2,SSC5D,RNASE1,PLA2G2A,TF,RAB1A,IGHD,IGHV3-72
GO Process	GO:0034330	Cell junction organization	22	492	0.51	0.00031	9606.ENSP00000225655,9606.ENSP00000245907,9606.ENSP00000257192,9606.ENSP00000258341,9606.ENSP00000265131,9606.ENSP00000268603,9606.ENSP00000284981,9606.ENSP00000313967,9606.ENSP00000314067,9606.ENSP00000316029,9606.ENSP00000321108,9606.ENSP00000347457,9606.ENSP00000354791,9606.ENSP00000363593,9606.ENSP00000363770,9606.ENSP00000369129,9606.ENSP00000370593,9606.ENSP00000371798,9606.ENSP00000392423,…	PFN1,C3,DSG1,LAMC1,TNC,CDH11,APP,C1QB,PAK2,TLN1,SPOCK2,DNM3,DCTN1,SVEP1,C1QC,DSP,PTPRD,FSCN1,RELN,PRNP,ITGB3,PTPRS
GO Process	GO:0010035	Response to inorganic substance	23	532	0.49	0.00031	9606.ENSP00000012443,9606.ENSP00000222381,9606.ENSP00000230036,9606.ENSP00000233242,9606.ENSP00000241052,9606.ENSP00000260356,9606.ENSP00000262746,9606.ENSP00000263025,9606.ENSP00000268182,9606.ENSP00000284981,9606.ENSP00000298510,9606.ENSP00000301522,9606.ENSP00000307549,9606.ENSP00000320866,9606.ENSP00000339933,9606.ENSP00000366109,9606.ENSP00000376506,9606.ENSP00000378721,9606.ENSP00000385834,…	PPP5C,PON1,GPLD1,APOB,CAT,THBS1,PRDX1,MAPK3,IQGAP1,APP,PRDX3,PRDX2,NPTX1,CALR,PKLR,ANXA1,PDCD10,SEC31A,TF,PRNP,CPS1,TTN,HBB
GO Process	GO:0022603	Regulation of anatomical structure morphogenesis	32	920	0.4	0.00031	9606.ENSP00000205948,9606.ENSP00000207549,9606.ENSP00000223642,9606.ENSP00000232003,9606.ENSP00000236850,9606.ENSP00000245907,9606.ENSP00000252244,9606.ENSP00000260356,9606.ENSP00000263710,9606.ENSP00000296435,9606.ENSP00000302486,9606.ENSP00000302621,9606.ENSP00000303908,9606.ENSP00000308541,9606.ENSP00000312946,9606.ENSP00000314067,9606.ENSP00000320866,9606.ENSP00000340211,9606.ENSP00000347457,…	APOH,UNC13D,C5,HRG,APOA1,C3,KRT1,THBS1,CLASP1,CAMP,MAP2K1,LRG1,TWF2,F2,STAB1,PAK2,CALR,CORO1B,DNM3,AGT,NIBAN2,PGK1,HSPG2,ANXA1,PTPRD,PDCD10,CXCL12,RELN,CORO1C,ITGB3,PTPRS,NOTCH1
GO Process	GO:0048514	Blood vessel morphogenesis	20	419	0.54	0.00034	9606.ENSP00000212355,9606.ENSP00000222271,9606.ENSP00000230036,9606.ENSP00000232003,9606.ENSP00000233242,9606.ENSP00000252804,9606.ENSP00000256646,9606.ENSP00000260356,9606.ENSP00000262407,9606.ENSP00000263388,9606.ENSP00000309953,9606.ENSP00000318195,9606.ENSP00000336762,9606.ENSP00000352798,9606.ENSP00000363827,9606.ENSP00000373539,9606.ENSP00000376506,9606.ENSP00000419260,9606.ENSP00000452786,…	TGFBR3,COMP,GPLD1,HRG,APOB,PXDN,NOTCH2,THBS1,ITGA2B,NOTCH3,EFEMP2,NCL,ANG,COL18A1,HSPG2,STAB2,PDCD10,PIK3CG,ITGB3,NOTCH1
GO Process	GO:0009892	Negative regulation of metabolic process	71	2982	0.23	0.00036	9606.ENSP00000215727,9606.ENSP00000217407,9606.ENSP00000223357,9606.ENSP00000223642,9606.ENSP00000226218,9606.ENSP00000227667,9606.ENSP00000230036,9606.ENSP00000232003,9606.ENSP00000236850,9606.ENSP00000245907,9606.ENSP00000255040,9606.ENSP00000256646,9606.ENSP00000259396,9606.ENSP00000260356,9606.ENSP00000262418,9606.ENSP00000263388,9606.ENSP00000265462,9606.ENSP00000268182,9606.ENSP00000271638,…	SERPIND1,LBP,AEBP1,C5,VTN,APOC3,GPLD1,HRG,APOA1,C3,APCS,NOTCH2,ORM1,THBS1,SLC4A1,NOTCH3,PRDX5,IQGAP1,S100A11,ITIH1,APP,COL6A3,PRDX3,F2,GNAI2,PAK2,CLU,BIN1,NCL,CALR,SPOCK2,A2M,SERPINA5,ANG,SERPINA6,ITIH2,FH,AGT,NIBAN1,LMNA,NIBAN2,HSPG2,ANXA1,RPS6KA3,IPO7,C1QTNF3,SERPINB12,SERPINB5,SSC5D,XRCC5,PDCD10,PROS1,GAPDH,RPS14,CORO1C,GSPT1,PRNP,PTPRC,C4B,SERPINA1,PIK3CG,OTUB1,SERPINA3,ITGB3,APOC2,PTPRS,HNRN…
GO Process	GO:0051918	Negative regulation of fibrinolysis	5	13	1.44	0.00038	9606.ENSP00000205948,9606.ENSP00000226218,9606.ENSP00000232003,9606.ENSP00000260356,9606.ENSP00000308541	APOH,VTN,HRG,THBS1,F2
GO Process	GO:0031638	Zymogen activation	8	59	0.99	0.0004	9606.ENSP00000205948,9606.ENSP00000218099,9606.ENSP00000253496,9606.ENSP00000308541,9606.ENSP00000362413,9606.ENSP00000364709,9606.ENSP00000441828,9606.ENSP00000444271	APOH,F9,F12,F2,PGK1,F10,HPR,C1R
GO Process	GO:0002526	Acute inflammatory response	9	80	0.91	0.0004	9606.ENSP00000217407,9606.ENSP00000253496,9606.ENSP00000255040,9606.ENSP00000259396,9606.ENSP00000308541,9606.ENSP00000323929,9606.ENSP00000416066,9606.ENSP00000441828,9606.ENSP00000450540	LBP,F12,APCS,ORM1,F2,A2M,SERPINA1,HPR,SERPINA3
GO Process	GO:0098609	Cell-cell adhesion	23	542	0.48	0.0004	9606.ENSP00000222271,9606.ENSP00000222399,9606.ENSP00000257192,9606.ENSP00000262407,9606.ENSP00000268603,9606.ENSP00000271638,9606.ENSP00000279022,9606.ENSP00000279227,9606.ENSP00000297848,9606.ENSP00000302621,9606.ENSP00000316029,9606.ENSP00000319623,9606.ENSP00000366109,9606.ENSP00000366513,9606.ENSP00000369129,9606.ENSP00000370593,9606.ENSP00000373489,9606.ENSP00000407685,9606.ENSP00000411355,…	COMP,LAMB1,DSG1,ITGA2B,CDH11,S100A11,MYL9,FERMT3,COL14A1,LRG1,TLN1,IGDCC4,ANXA1,CLSTN1,DSP,PTPRD,KRT18,TNXB,PTPRC,PIK3CG,ITGB3,PTPRS,HBB
GO Process	GO:0050764	Regulation of phagocytosis	10	104	0.84	0.00042	9606.ENSP00000236850,9606.ENSP00000245907,9606.ENSP00000288266,9606.ENSP00000291744,9606.ENSP00000299367,9606.ENSP00000320866,9606.ENSP00000360871,9606.ENSP00000411355,9606.ENSP00000415941,9606.ENSP00000416561	APOA1,C3,APPL1,FCN2,C2,CALR,FCN1,PTPRC,C4B,CFB
GO Process	GO:0010810	Regulation of cell-substrate adhesion	14	217	0.67	0.00042	9606.ENSP00000207549,9606.ENSP00000226218,9606.ENSP00000232003,9606.ENSP00000236850,9606.ENSP00000260356,9606.ENSP00000263710,9606.ENSP00000264187,9606.ENSP00000309953,9606.ENSP00000316029,9606.ENSP00000320866,9606.ENSP00000321108,9606.ENSP00000394496,9606.ENSP00000452786,9606.ENSP00000498587	UNC13D,VTN,HRG,APOA1,THBS1,CLASP1,NID1,EFEMP2,TLN1,CALR,SPOCK2,CORO1C,ITGB3,NOTCH1
GO Process	GO:0034109	Homotypic cell-cell adhesion	8	60	0.98	0.00043	9606.ENSP00000222271,9606.ENSP00000279022,9606.ENSP00000279227,9606.ENSP00000316029,9606.ENSP00000369129,9606.ENSP00000419260,9606.ENSP00000452786,9606.ENSP00000494175	COMP,MYL9,FERMT3,TLN1,DSP,PIK3CG,ITGB3,HBB
GO Process	GO:0090303	Positive regulation of wound healing	8	60	0.98	0.00043	9606.ENSP00000205948,9606.ENSP00000226218,9606.ENSP00000232003,9606.ENSP00000253496,9606.ENSP00000260356,9606.ENSP00000301522,9606.ENSP00000308541,9606.ENSP00000366109	APOH,VTN,HRG,F12,THBS1,PRDX2,F2,ANXA1
GO Process	GO:0001568	Blood vessel development	22	505	0.5	0.00043	9606.ENSP00000212355,9606.ENSP00000222271,9606.ENSP00000230036,9606.ENSP00000232003,9606.ENSP00000233242,9606.ENSP00000252804,9606.ENSP00000256646,9606.ENSP00000260356,9606.ENSP00000262407,9606.ENSP00000263388,9606.ENSP00000302486,9606.ENSP00000309953,9606.ENSP00000318195,9606.ENSP00000336762,9606.ENSP00000352798,9606.ENSP00000360882,9606.ENSP00000363827,9606.ENSP00000373539,9606.ENSP00000376506,…	TGFBR3,COMP,GPLD1,HRG,APOB,PXDN,NOTCH2,THBS1,ITGA2B,NOTCH3,MAP2K1,EFEMP2,NCL,ANG,COL18A1,COL5A1,HSPG2,STAB2,PDCD10,PIK3CG,ITGB3,NOTCH1
GO Process	GO:0006953	Acute-phase response	7	42	1.08	0.00046	9606.ENSP00000217407,9606.ENSP00000255040,9606.ENSP00000259396,9606.ENSP00000308541,9606.ENSP00000323929,9606.ENSP00000416066,9606.ENSP00000450540	LBP,APCS,ORM1,F2,A2M,SERPINA1,SERPINA3
GO Process	GO:0010896	Regulation of triglyceride catabolic process	5	14	1.41	0.00048	9606.ENSP00000227667,9606.ENSP00000230036,9606.ENSP00000236850,9606.ENSP00000419260,9606.ENSP00000466775	APOC3,GPLD1,APOA1,PIK3CG,APOC2
GO Process	GO:0070527	Platelet aggregation	7	43	1.07	0.00052	9606.ENSP00000222271,9606.ENSP00000279022,9606.ENSP00000279227,9606.ENSP00000316029,9606.ENSP00000419260,9606.ENSP00000452786,9606.ENSP00000494175	COMP,MYL9,FERMT3,TLN1,PIK3CG,ITGB3,HBB
GO Process	GO:0006793	Phosphorus metabolic process	51	1902	0.29	0.00052	9606.ENSP00000012443,9606.ENSP00000200676,9606.ENSP00000212355,9606.ENSP00000222381,9606.ENSP00000230036,9606.ENSP00000236850,9606.ENSP00000252804,9606.ENSP00000253382,9606.ENSP00000263025,9606.ENSP00000265983,9606.ENSP00000270776,9606.ENSP00000284981,9606.ENSP00000294964,9606.ENSP00000302486,9606.ENSP00000311713,9606.ENSP00000314067,9606.ENSP00000322706,9606.ENSP00000332073,9606.ENSP00000339933,…	PPP5C,CETP,TGFBR3,PON1,GPLD1,APOA1,PXDN,ACSS2,MAPK3,HPX,PGD,APP,PKDCC,MAP2K1,OXSR1,PAK2,HMGCS1,MGAT1,PKLR,SPTBN1,GFPT1,ATP1B1,MINPP1,PGK1,RPS6KA3,PFKP,PTPRD,GARS1,EFEMP1,GNE,GAPDH,PAICS,PLA2G2A,PPP1R12A,TKT,RELN,CPS1,PTPRC,PIK3CG,GMPS,PGM3,ADK,LDHA,GALK2,TTN,PTPRS,UPP2,PTPN11,ENO1,MTHFD1,AMPD2
GO Process	GO:0031347	Regulation of defense response	25	638	0.45	0.00053	9606.ENSP00000217407,9606.ENSP00000236850,9606.ENSP00000245907,9606.ENSP00000252244,9606.ENSP00000253496,9606.ENSP00000255040,9606.ENSP00000263025,9606.ENSP00000265131,9606.ENSP00000265983,9606.ENSP00000284981,9606.ENSP00000288266,9606.ENSP00000291744,9606.ENSP00000314067,9606.ENSP00000323929,9606.ENSP00000352438,9606.ENSP00000355627,9606.ENSP00000356399,9606.ENSP00000360871,9606.ENSP00000366109,…	LBP,APOA1,C3,KRT1,F12,APCS,MAPK3,TNC,HPX,APP,APPL1,FCN2,PAK2,A2M,PCBP2,AGT,CFH,FCN1,ANXA1,C1QTNF3,XRCC5,PLA2G2A,PTPRC,PIK3CG,PTPN11
GO Process	GO:0016477	Cell migration	31	903	0.39	0.00053	9606.ENSP00000212355,9606.ENSP00000217407,9606.ENSP00000222399,9606.ENSP00000223642,9606.ENSP00000226218,9606.ENSP00000230036,9606.ENSP00000236850,9606.ENSP00000258341,9606.ENSP00000260356,9606.ENSP00000268182,9606.ENSP00000302621,9606.ENSP00000310861,9606.ENSP00000336762,9606.ENSP00000340211,9606.ENSP00000360882,9606.ENSP00000366109,9606.ENSP00000371798,9606.ENSP00000376506,9606.ENSP00000379140,…	TGFBR3,LBP,LAMB1,C5,VTN,GPLD1,APOA1,LAMC1,THBS1,IQGAP1,LRG1,KRT2,ANG,CORO1B,COL5A1,ANXA1,FSCN1,PDCD10,CXCL12,LCP1,PSTPIP2,RAB1A,RELN,CORO1C,PTPRC,PIK3CG,ITGB3,CCL14,CCL18,PTPN11,NOTCH1
GO Process	GO:2000026	Regulation of multicellular organismal development	41	1389	0.33	0.00056	9606.ENSP00000205948,9606.ENSP00000212355,9606.ENSP00000222271,9606.ENSP00000223642,9606.ENSP00000232003,9606.ENSP00000245907,9606.ENSP00000252244,9606.ENSP00000255040,9606.ENSP00000256646,9606.ENSP00000260356,9606.ENSP00000263710,9606.ENSP00000294964,9606.ENSP00000296435,9606.ENSP00000301522,9606.ENSP00000302486,9606.ENSP00000302621,9606.ENSP00000303908,9606.ENSP00000305699,9606.ENSP00000308541,…	APOH,TGFBR3,COMP,C5,HRG,C3,KRT1,APCS,NOTCH2,THBS1,CLASP1,PKDCC,CAMP,PRDX2,MAP2K1,LRG1,TWF2,HOOK3,F2,STAB1,BIN1,AGT,NIBAN2,PGK1,MATN1,C1QC,HSPG2,ANXA1,CLSTN1,PTPRD,XRCC5,PDCD10,EFEMP1,CXCL12,RELN,PTPRC,FBN2,ITGB3,PTPRS,PTPN11,NOTCH1
GO Process	GO:0048731	System development	85	3867	0.2	0.00058	9606.ENSP00000212355,9606.ENSP00000222271,9606.ENSP00000222399,9606.ENSP00000225655,9606.ENSP00000226218,9606.ENSP00000230036,9606.ENSP00000232003,9606.ENSP00000233242,9606.ENSP00000236850,9606.ENSP00000241052,9606.ENSP00000245907,9606.ENSP00000252804,9606.ENSP00000256646,9606.ENSP00000260356,9606.ENSP00000261772,9606.ENSP00000262407,9606.ENSP00000262418,9606.ENSP00000262746,9606.ENSP00000263025,…	TGFBR3,COMP,LAMB1,PFN1,VTN,GPLD1,HRG,APOB,APOA1,CAT,C3,PXDN,NOTCH2,THBS1,AARS1,ITGA2B,SLC4A1,PRDX1,MAPK3,NOTCH3,NID1,TNC,IQGAP1,CDH11,APP,PKDCC,PRDX3,PRDX2,MAP2K1,HOOK3,NPTX1,EFEMP2,PAK2,CLU,NCL,CALR,SPOCK2,A2M,ANG,RPL22,ADAMTSL2,DNM3,SPTBN1,COL18A1,DCTN1,KRT19,AGT,LMNA,THBS3,COL5A1,NIBAN2,MATN1,SVEP1,HSPG2,ANXA1,RPS6KA3,DSP,PTPRD,SERPINB12,SERPINB5,STAB2,XRCC5,PDCD10,EFEMP1,CXCL12,MATN3,CUL4B,TF…
GO Process	GO:0051647	Nucleus localization	6	28	1.19	0.0006	9606.ENSP00000258201,9606.ENSP00000305699,9606.ENSP00000316779,9606.ENSP00000348965,9606.ENSP00000354791,9606.ENSP00000357283	FHOD1,HOOK3,BIN1,DYNC1H1,DCTN1,LMNA
GO Process	GO:0001819	Positive regulation of cytokine production	21	482	0.5	0.00065	9606.ENSP00000217407,9606.ENSP00000223642,9606.ENSP00000245907,9606.ENSP00000259396,9606.ENSP00000260356,9606.ENSP00000266718,9606.ENSP00000284981,9606.ENSP00000288266,9606.ENSP00000296435,9606.ENSP00000315130,9606.ENSP00000349259,9606.ENSP00000355627,9606.ENSP00000360871,9606.ENSP00000366109,9606.ENSP00000371497,9606.ENSP00000380070,9606.ENSP00000387286,9606.ENSP00000411355,9606.ENSP00000419260,…	LBP,C5,C3,ORM1,THBS1,LUM,APP,APPL1,CAMP,CLU,SPTBN1,AGT,FCN1,ANXA1,C1QTNF3,GAPDH,RAB1A,PTPRC,PIK3CG,IGHD,PTPN11
GO Process	GO:0010632	Regulation of epithelial cell migration	14	229	0.64	0.00069	9606.ENSP00000205948,9606.ENSP00000225655,9606.ENSP00000230036,9606.ENSP00000232003,9606.ENSP00000260356,9606.ENSP00000263710,9606.ENSP00000320866,9606.ENSP00000355627,9606.ENSP00000366109,9606.ENSP00000376506,9606.ENSP00000394496,9606.ENSP00000419260,9606.ENSP00000452786,9606.ENSP00000498587	APOH,PFN1,GPLD1,HRG,THBS1,CLASP1,CALR,AGT,ANXA1,PDCD10,CORO1C,PIK3CG,ITGB3,NOTCH1
GO Process	GO:0042221	Response to chemical	87	4010	0.19	0.00069	9606.ENSP00000012443,9606.ENSP00000212355,9606.ENSP00000215727,9606.ENSP00000217407,9606.ENSP00000222271,9606.ENSP00000222381,9606.ENSP00000223642,9606.ENSP00000230036,9606.ENSP00000232003,9606.ENSP00000233242,9606.ENSP00000236850,9606.ENSP00000241052,9606.ENSP00000247461,9606.ENSP00000252590,9606.ENSP00000252804,9606.ENSP00000253496,9606.ENSP00000256646,9606.ENSP00000257192,9606.ENSP00000260356,…	PPP5C,TGFBR3,SERPIND1,LBP,COMP,PON1,C5,GPLD1,HRG,APOB,APOA1,CAT,CANX,PLVAP,PXDN,F12,NOTCH2,DSG1,THBS1,PRDX1,MAPK3,NOTCH3,PRDX5,HPX,IQGAP1,APP,APPL1,AZGP1,CAMP,PRDX3,COL6A2,PRDX2,MAP2K1,HSPA4,TWF2,NPTX1,OXSR1,LTBP4,GNAI2,PAK2,CLU,NCL,CALR,SPOCK2,A2M,ANG,PKLR,CORO1B,CACNA2D1,KRT19,COL6A1,AGT,LMNA,NIBAN2,PGK1,ATF6B,ANXA1,RPS6KA3,POSTN,PFKP,KRT18,SSC5D,XRCC5,PDCD10,SEC31A,CXCL12,GAPDH,TF,PSMD14,PPP1R…
GO Process	GO:0051873	Killing by host of symbiont cells	6	29	1.17	0.0007	9606.ENSP00000232003,9606.ENSP00000296435,9606.ENSP00000308541,9606.ENSP00000317674,9606.ENSP00000369317,9606.ENSP00000380070	HRG,CAMP,F2,APOL1,KRT6A,GAPDH
GO Process	GO:0001817	Regulation of cytokine production	27	739	0.42	0.00071	9606.ENSP00000217407,9606.ENSP00000223642,9606.ENSP00000236850,9606.ENSP00000245907,9606.ENSP00000259396,9606.ENSP00000260356,9606.ENSP00000266718,9606.ENSP00000268182,9606.ENSP00000284981,9606.ENSP00000288266,9606.ENSP00000296435,9606.ENSP00000308541,9606.ENSP00000315130,9606.ENSP00000349259,9606.ENSP00000355627,9606.ENSP00000360871,9606.ENSP00000366109,9606.ENSP00000371497,9606.ENSP00000374274,…	LBP,C5,APOA1,C3,ORM1,THBS1,LUM,IQGAP1,APP,APPL1,CAMP,F2,CLU,SPTBN1,AGT,FCN1,ANXA1,C1QTNF3,SSC5D,GAPDH,RAB1A,PRNP,PTPRC,PIK3CG,PTPRS,IGHD,PTPN11
GO Process	GO:0048870	Cell motility	34	1061	0.36	0.00071	9606.ENSP00000212355,9606.ENSP00000217407,9606.ENSP00000222399,9606.ENSP00000223642,9606.ENSP00000226218,9606.ENSP00000230036,9606.ENSP00000233242,9606.ENSP00000236850,9606.ENSP00000258341,9606.ENSP00000260356,9606.ENSP00000268182,9606.ENSP00000302486,9606.ENSP00000302621,9606.ENSP00000310861,9606.ENSP00000336762,9606.ENSP00000340211,9606.ENSP00000360882,9606.ENSP00000366109,9606.ENSP00000371798,…	TGFBR3,LBP,LAMB1,C5,VTN,GPLD1,APOB,APOA1,LAMC1,THBS1,IQGAP1,MAP2K1,LRG1,KRT2,ANG,CORO1B,COL5A1,ANXA1,FSCN1,PDCD10,CXCL12,LCP1,PSTPIP2,RAB1A,RELN,CORO1C,PTPRC,PLTP,PIK3CG,ITGB3,CCL14,CCL18,PTPN11,NOTCH1
GO Process	GO:0061844	Antimicrobial humoral immune response mediated by antimicrobial peptide	10	113	0.8	0.00072	9606.ENSP00000232003,9606.ENSP00000284981,9606.ENSP00000296435,9606.ENSP00000308541,9606.ENSP00000336762,9606.ENSP00000369317,9606.ENSP00000379140,9606.ENSP00000380070,9606.ENSP00000479955,9606.ENSP00000493985	HRG,APP,CAMP,F2,ANG,KRT6A,CXCL12,GAPDH,CCL18,KNG1
GO Process	GO:0030155	Regulation of cell adhesion	28	784	0.41	0.00072	9606.ENSP00000207549,9606.ENSP00000222399,9606.ENSP00000226218,9606.ENSP00000232003,9606.ENSP00000236850,9606.ENSP00000258341,9606.ENSP00000260356,9606.ENSP00000263710,9606.ENSP00000264187,9606.ENSP00000265131,9606.ENSP00000279227,9606.ENSP00000301522,9606.ENSP00000309953,9606.ENSP00000316029,9606.ENSP00000320866,9606.ENSP00000321108,9606.ENSP00000366109,9606.ENSP00000379140,9606.ENSP00000389168,…	UNC13D,LAMB1,VTN,HRG,APOA1,LAMC1,THBS1,CLASP1,NID1,TNC,FERMT3,PRDX2,EFEMP2,TLN1,CALR,SPOCK2,ANXA1,CXCL12,PPP1R12A,CORO1C,PRNP,TNXB,PTPRC,PIK3CG,ITGB3,PTPN11,KNG1,NOTCH1
GO Process	GO:0043588	Skin development	15	266	0.61	0.00079	9606.ENSP00000222271,9606.ENSP00000252242,9606.ENSP00000252244,9606.ENSP00000269576,9606.ENSP00000302486,9606.ENSP00000310861,9606.ENSP00000329243,9606.ENSP00000342710,9606.ENSP00000360882,9606.ENSP00000366109,9606.ENSP00000369129,9606.ENSP00000369317,9606.ENSP00000373370,9606.ENSP00000420213,9606.ENSP00000498587	COMP,KRT5,KRT1,KRT10,MAP2K1,KRT2,KRT7,KRT77,COL5A1,ANXA1,DSP,KRT6A,FLG2,FLNB,NOTCH1
GO Process	GO:0060429	Epithelium development	34	1069	0.36	0.0008	9606.ENSP00000167586,9606.ENSP00000225655,9606.ENSP00000241052,9606.ENSP00000245907,9606.ENSP00000246635,9606.ENSP00000252242,9606.ENSP00000252244,9606.ENSP00000256646,9606.ENSP00000265131,9606.ENSP00000268182,9606.ENSP00000269576,9606.ENSP00000302486,9606.ENSP00000302621,9606.ENSP00000310861,9606.ENSP00000329243,9606.ENSP00000342710,9606.ENSP00000346478,9606.ENSP00000352798,9606.ENSP00000355124,…	KRT14,PFN1,CAT,C3,KRT13,KRT5,KRT1,NOTCH2,TNC,IQGAP1,KRT10,MAP2K1,LRG1,KRT2,KRT7,KRT77,ADAMTSL2,COL18A1,KRT19,ADAMTSL4,COL5A1,PGK1,ANXA1,DSP,KRT6A,SERPINB5,FLG2,PDCD10,CPS1,FLNB,VIM,PTPRS,MTHFD1,NOTCH1
GO Process	GO:0032103	Positive regulation of response to external stimulus	20	453	0.5	0.00085	9606.ENSP00000205948,9606.ENSP00000217407,9606.ENSP00000226218,9606.ENSP00000232003,9606.ENSP00000245907,9606.ENSP00000260356,9606.ENSP00000263025,9606.ENSP00000265983,9606.ENSP00000284981,9606.ENSP00000291744,9606.ENSP00000308541,9606.ENSP00000311713,9606.ENSP00000314067,9606.ENSP00000320866,9606.ENSP00000355627,9606.ENSP00000360871,9606.ENSP00000375978,9606.ENSP00000379140,9606.ENSP00000383364,…	APOH,LBP,VTN,HRG,C3,THBS1,MAPK3,HPX,APP,FCN2,F2,OXSR1,PAK2,CALR,AGT,FCN1,XRCC5,CXCL12,PLA2G2A,PIK3CG
GO Process	GO:0006641	Triglyceride metabolic process	8	68	0.93	0.00087	9606.ENSP00000200676,9606.ENSP00000205948,9606.ENSP00000227667,9606.ENSP00000233242,9606.ENSP00000241052,9606.ENSP00000402608,9606.ENSP00000407685,9606.ENSP00000489597	CETP,APOH,APOC3,APOB,CAT,CPS1,TNXB,PTPN11
GO Process	GO:0045595	Regulation of cell differentiation	44	1582	0.3	0.00096	9606.ENSP00000200676,9606.ENSP00000207549,9606.ENSP00000222399,9606.ENSP00000233242,9606.ENSP00000236850,9606.ENSP00000255040,9606.ENSP00000256646,9606.ENSP00000258341,9606.ENSP00000263388,9606.ENSP00000263710,9606.ENSP00000264187,9606.ENSP00000284981,9606.ENSP00000294964,9606.ENSP00000301522,9606.ENSP00000302486,9606.ENSP00000302621,9606.ENSP00000303908,9606.ENSP00000305699,9606.ENSP00000308541,…	CETP,UNC13D,LAMB1,APOB,APOA1,APCS,NOTCH2,LAMC1,NOTCH3,CLASP1,NID1,APP,PKDCC,PRDX2,MAP2K1,LRG1,TWF2,HOOK3,F2,EFEMP2,BIN1,CALR,SPOCK2,AGT,COL5A1,NIBAN2,C1QC,ANXA1,RPS6KA3,PTPRD,XRCC5,EFEMP1,CXCL12,PLA2G2A,RELN,CORO1C,TNXB,PTPRC,FBN2,ITGB3,PTPRS,PTPN11,HNRNPU,NOTCH1
GO Process	GO:1902903	Regulation of supramolecular fiber organization	18	382	0.53	0.001	9606.ENSP00000223357,9606.ENSP00000225655,9606.ENSP00000236850,9606.ENSP00000258201,9606.ENSP00000263710,9606.ENSP00000284981,9606.ENSP00000303908,9606.ENSP00000309953,9606.ENSP00000314067,9606.ENSP00000315130,9606.ENSP00000316779,9606.ENSP00000340211,9606.ENSP00000349259,9606.ENSP00000354791,9606.ENSP00000363827,9606.ENSP00000379140,9606.ENSP00000407685,9606.ENSP00000487444	AEBP1,PFN1,APOA1,FHOD1,CLASP1,APP,TWF2,EFEMP2,PAK2,CLU,BIN1,CORO1B,SPTBN1,DCTN1,HSPG2,CXCL12,TNXB,SPTAN1
GO Process	GO:0043691	Reverse cholesterol transport	5	18	1.3	0.0012	9606.ENSP00000200676,9606.ENSP00000227667,9606.ENSP00000236850,9606.ENSP00000315130,9606.ENSP00000466775	CETP,APOC3,APOA1,CLU,APOC2
GO Process	GO:0006639	Acylglycerol metabolic process	9	95	0.83	0.0012	9606.ENSP00000200676,9606.ENSP00000205948,9606.ENSP00000227667,9606.ENSP00000233242,9606.ENSP00000241052,9606.ENSP00000336762,9606.ENSP00000402608,9606.ENSP00000407685,9606.ENSP00000489597	CETP,APOH,APOC3,APOB,CAT,ANG,CPS1,TNXB,PTPN11
GO Process	GO:0019730	Antimicrobial humoral response	11	149	0.72	0.0012	9606.ENSP00000232003,9606.ENSP00000284981,9606.ENSP00000296435,9606.ENSP00000308541,9606.ENSP00000336762,9606.ENSP00000369317,9606.ENSP00000379140,9606.ENSP00000380070,9606.ENSP00000385834,9606.ENSP00000479955,9606.ENSP00000493985	HRG,APP,CAMP,F2,ANG,KRT6A,CXCL12,GAPDH,TF,CCL18,KNG1
GO Process	GO:1901700	Response to oxygen-containing compound	43	1547	0.3	0.0012	9606.ENSP00000012443,9606.ENSP00000212355,9606.ENSP00000217407,9606.ENSP00000222381,9606.ENSP00000230036,9606.ENSP00000233242,9606.ENSP00000241052,9606.ENSP00000257192,9606.ENSP00000260356,9606.ENSP00000262746,9606.ENSP00000263025,9606.ENSP00000265462,9606.ENSP00000284981,9606.ENSP00000288266,9606.ENSP00000296435,9606.ENSP00000298510,9606.ENSP00000300527,9606.ENSP00000301522,9606.ENSP00000303908,…	PPP5C,TGFBR3,LBP,PON1,GPLD1,APOB,CAT,DSG1,THBS1,PRDX1,MAPK3,PRDX5,APP,APPL1,CAMP,PRDX3,COL6A2,PRDX2,TWF2,NPTX1,GNAI2,CALR,A2M,PKLR,CACNA2D1,COL6A1,AGT,ANXA1,RPS6KA3,POSTN,XRCC5,PDCD10,CXCL12,PSMD14,PRNP,CPS1,PIK3CG,ATP1A3,VIM,ITGB3,HBB,NOTCH1,SNX6
GO Process	GO:0010605	Negative regulation of macromolecule metabolic process	65	2760	0.23	0.0012	9606.ENSP00000215727,9606.ENSP00000217407,9606.ENSP00000223357,9606.ENSP00000223642,9606.ENSP00000226218,9606.ENSP00000232003,9606.ENSP00000236850,9606.ENSP00000245907,9606.ENSP00000255040,9606.ENSP00000256646,9606.ENSP00000259396,9606.ENSP00000260356,9606.ENSP00000263388,9606.ENSP00000265462,9606.ENSP00000271638,9606.ENSP00000273283,9606.ENSP00000284981,9606.ENSP00000295550,9606.ENSP00000298510,…	SERPIND1,LBP,AEBP1,C5,VTN,HRG,APOA1,C3,APCS,NOTCH2,ORM1,THBS1,NOTCH3,PRDX5,S100A11,ITIH1,APP,COL6A3,PRDX3,F2,GNAI2,PAK2,CLU,BIN1,NCL,CALR,SPOCK2,A2M,SERPINA5,ANG,SERPINA6,ITIH2,FH,AGT,NIBAN1,LMNA,NIBAN2,HSPG2,ANXA1,RPS6KA3,IPO7,C1QTNF3,SERPINB12,SERPINB5,SSC5D,XRCC5,PDCD10,PROS1,GAPDH,RPS14,CORO1C,GSPT1,PRNP,PTPRC,C4B,SERPINA1,OTUB1,SERPINA3,ITGB3,PTPRS,HNRNPU,KNG1,ENO1,NOTCH1,SNX6
GO Process	GO:0051130	Positive regulation of cellular component organization	33	1049	0.35	0.0013	9606.ENSP00000225655,9606.ENSP00000226218,9606.ENSP00000232003,9606.ENSP00000236850,9606.ENSP00000245907,9606.ENSP00000258201,9606.ENSP00000263025,9606.ENSP00000263710,9606.ENSP00000284981,9606.ENSP00000288266,9606.ENSP00000302486,9606.ENSP00000303908,9606.ENSP00000309953,9606.ENSP00000315130,9606.ENSP00000316779,9606.ENSP00000340211,9606.ENSP00000347457,9606.ENSP00000348965,9606.ENSP00000354791,…	PFN1,VTN,HRG,APOA1,C3,FHOD1,MAPK3,CLASP1,APP,APPL1,MAP2K1,TWF2,EFEMP2,CLU,BIN1,CORO1B,DNM3,DYNC1H1,DCTN1,AGT,ANXA1,CLSTN1,AHNAK,PTPRD,FSCN1,XRCC5,CXCL12,LCP1,TF,RELN,CORO1C,TNXB,APOC2
GO Process	GO:0007275	Multicellular organism development	89	4209	0.18	0.0013	9606.ENSP00000212355,9606.ENSP00000222271,9606.ENSP00000222399,9606.ENSP00000223642,9606.ENSP00000225655,9606.ENSP00000226218,9606.ENSP00000230036,9606.ENSP00000232003,9606.ENSP00000233242,9606.ENSP00000236850,9606.ENSP00000241052,9606.ENSP00000245907,9606.ENSP00000252804,9606.ENSP00000256646,9606.ENSP00000260356,9606.ENSP00000261772,9606.ENSP00000262407,9606.ENSP00000262418,9606.ENSP00000262746,…	TGFBR3,COMP,LAMB1,C5,PFN1,VTN,GPLD1,HRG,APOB,APOA1,CAT,C3,PXDN,NOTCH2,THBS1,AARS1,ITGA2B,SLC4A1,PRDX1,MAPK3,NOTCH3,NID1,TNC,IQGAP1,CDH11,APP,PKDCC,PRDX3,PRDX2,MAP2K1,HOOK3,NPTX1,EFEMP2,PAK2,CLU,NCL,CALR,SPOCK2,A2M,COL12A1,MGAT1,ANG,RPL22,ADAMTSL2,DNM3,SPTBN1,COL18A1,DCTN1,KRT19,COL6A1,AGT,LMNA,THBS3,COL5A1,NIBAN2,MATN1,SVEP1,HSPG2,ANXA1,RPS6KA3,DSP,PTPRD,SERPINB12,SERPINB5,STAB2,XRCC5,PDCD10,EFEM…
GO Process	GO:0042730	Fibrinolysis	5	19	1.28	0.0014	9606.ENSP00000232003,9606.ENSP00000252244,9606.ENSP00000253496,9606.ENSP00000308541,9606.ENSP00000377783	HRG,KRT1,F12,F2,PROS1
GO Process	GO:0006796	Phosphate-containing compound metabolic process	49	1877	0.27	0.0014	9606.ENSP00000012443,9606.ENSP00000200676,9606.ENSP00000212355,9606.ENSP00000222381,9606.ENSP00000230036,9606.ENSP00000236850,9606.ENSP00000252804,9606.ENSP00000253382,9606.ENSP00000263025,9606.ENSP00000265983,9606.ENSP00000270776,9606.ENSP00000284981,9606.ENSP00000294964,9606.ENSP00000302486,9606.ENSP00000311713,9606.ENSP00000314067,9606.ENSP00000322706,9606.ENSP00000339933,9606.ENSP00000349259,…	PPP5C,CETP,TGFBR3,PON1,GPLD1,APOA1,PXDN,ACSS2,MAPK3,HPX,PGD,APP,PKDCC,MAP2K1,OXSR1,PAK2,HMGCS1,PKLR,SPTBN1,GFPT1,ATP1B1,MINPP1,PGK1,RPS6KA3,PFKP,PTPRD,GARS1,EFEMP1,GNE,GAPDH,PAICS,PLA2G2A,PPP1R12A,TKT,RELN,CPS1,PTPRC,PIK3CG,GMPS,ADK,LDHA,GALK2,TTN,PTPRS,UPP2,PTPN11,ENO1,MTHFD1,AMPD2
GO Process	GO:0070887	Cellular response to chemical stimulus	62	2609	0.23	0.0015	9606.ENSP00000212355,9606.ENSP00000217407,9606.ENSP00000222271,9606.ENSP00000223642,9606.ENSP00000230036,9606.ENSP00000233242,9606.ENSP00000241052,9606.ENSP00000252590,9606.ENSP00000252804,9606.ENSP00000256646,9606.ENSP00000260356,9606.ENSP00000262746,9606.ENSP00000263025,9606.ENSP00000265462,9606.ENSP00000265983,9606.ENSP00000268182,9606.ENSP00000284981,9606.ENSP00000288266,9606.ENSP00000296435,…	TGFBR3,LBP,COMP,C5,GPLD1,APOB,CAT,PLVAP,PXDN,NOTCH2,THBS1,PRDX1,MAPK3,PRDX5,HPX,IQGAP1,APP,APPL1,CAMP,PRDX3,PRDX2,TWF2,NPTX1,OXSR1,LTBP4,GNAI2,PAK2,NCL,CALR,SPOCK2,PKLR,CORO1B,CACNA2D1,COL6A1,AGT,LMNA,PGK1,ATF6B,ANXA1,POSTN,PFKP,KRT18,XRCC5,PDCD10,CXCL12,GAPDH,TF,PPP1R12A,PRNP,CPS1,PIK3CG,FLNB,ATP1A3,VIM,ITGB3,CCL14,CCL18,PTPN11,HNRNPU,HBB,NOTCH1,SNX6
GO Process	GO:0051129	Negative regulation of cellular component organization	25	691	0.42	0.0016	9606.ENSP00000225655,9606.ENSP00000227667,9606.ENSP00000232003,9606.ENSP00000236850,9606.ENSP00000260356,9606.ENSP00000263710,9606.ENSP00000284981,9606.ENSP00000303908,9606.ENSP00000314067,9606.ENSP00000315130,9606.ENSP00000340211,9606.ENSP00000347457,9606.ENSP00000349259,9606.ENSP00000357283,9606.ENSP00000363827,9606.ENSP00000375978,9606.ENSP00000394496,9606.ENSP00000399376,9606.ENSP00000446007,…	PFN1,APOC3,HRG,APOA1,THBS1,CLASP1,APP,TWF2,PAK2,CLU,CORO1B,DNM3,SPTBN1,LMNA,HSPG2,XRCC5,CORO1C,PRNP,VIM,ITGB3,APOC2,PTPRS,SPTAN1,HNRNPU,NOTCH1
GO Process	GO:0045765	Regulation of angiogenesis	15	288	0.57	0.0017	9606.ENSP00000205948,9606.ENSP00000223642,9606.ENSP00000232003,9606.ENSP00000245907,9606.ENSP00000252244,9606.ENSP00000260356,9606.ENSP00000296435,9606.ENSP00000302621,9606.ENSP00000312946,9606.ENSP00000355627,9606.ENSP00000362409,9606.ENSP00000362413,9606.ENSP00000363827,9606.ENSP00000376506,9606.ENSP00000452786	APOH,C5,HRG,C3,KRT1,THBS1,CAMP,LRG1,STAB1,AGT,NIBAN2,PGK1,HSPG2,PDCD10,ITGB3
GO Process	GO:0045597	Positive regulation of cell differentiation	29	876	0.38	0.0017	9606.ENSP00000207549,9606.ENSP00000222399,9606.ENSP00000233242,9606.ENSP00000236850,9606.ENSP00000256646,9606.ENSP00000258341,9606.ENSP00000264187,9606.ENSP00000284981,9606.ENSP00000294964,9606.ENSP00000302486,9606.ENSP00000302621,9606.ENSP00000303908,9606.ENSP00000309953,9606.ENSP00000316779,9606.ENSP00000320866,9606.ENSP00000355627,9606.ENSP00000362409,9606.ENSP00000366109,9606.ENSP00000368884,…	UNC13D,LAMB1,APOB,APOA1,NOTCH2,LAMC1,NID1,APP,PKDCC,MAP2K1,LRG1,TWF2,EFEMP2,BIN1,CALR,AGT,NIBAN2,ANXA1,RPS6KA3,PTPRD,XRCC5,CXCL12,PLA2G2A,RELN,PTPRC,FBN2,ITGB3,HNRNPU,NOTCH1
GO Process	GO:0008228	Opsonization	4	9	1.5	0.0018	9606.ENSP00000217407,9606.ENSP00000245907,9606.ENSP00000291744,9606.ENSP00000415941	LBP,C3,FCN2,C4B
GO Process	GO:0001525	Angiogenesis	16	325	0.55	0.0018	9606.ENSP00000230036,9606.ENSP00000232003,9606.ENSP00000252804,9606.ENSP00000256646,9606.ENSP00000260356,9606.ENSP00000262407,9606.ENSP00000263388,9606.ENSP00000318195,9606.ENSP00000336762,9606.ENSP00000352798,9606.ENSP00000363827,9606.ENSP00000373539,9606.ENSP00000376506,9606.ENSP00000419260,9606.ENSP00000452786,9606.ENSP00000498587	GPLD1,HRG,PXDN,NOTCH2,THBS1,ITGA2B,NOTCH3,NCL,ANG,COL18A1,HSPG2,STAB2,PDCD10,PIK3CG,ITGB3,NOTCH1
GO Process	GO:0035295	Tube development	29	880	0.37	0.0018	9606.ENSP00000212355,9606.ENSP00000222271,9606.ENSP00000225655,9606.ENSP00000230036,9606.ENSP00000232003,9606.ENSP00000233242,9606.ENSP00000241052,9606.ENSP00000245907,9606.ENSP00000252804,9606.ENSP00000256646,9606.ENSP00000260356,9606.ENSP00000262407,9606.ENSP00000263025,9606.ENSP00000263388,9606.ENSP00000294964,9606.ENSP00000302486,9606.ENSP00000309953,9606.ENSP00000318195,9606.ENSP00000336762,…	TGFBR3,COMP,PFN1,GPLD1,HRG,APOB,CAT,C3,PXDN,NOTCH2,THBS1,ITGA2B,MAPK3,NOTCH3,PKDCC,MAP2K1,EFEMP2,NCL,ANG,ADAMTSL2,COL18A1,HSPG2,STAB2,PDCD10,CPS1,PIK3CG,ITGB3,MTHFD1,NOTCH1
GO Process	GO:0050830	Defense response to Gram-positive bacterium	10	130	0.74	0.0019	9606.ENSP00000217407,9606.ENSP00000284981,9606.ENSP00000291744,9606.ENSP00000296435,9606.ENSP00000336762,9606.ENSP00000369317,9606.ENSP00000373539,9606.ENSP00000374274,9606.ENSP00000381057,9606.ENSP00000383364	LBP,APP,FCN2,CAMP,ANG,KRT6A,STAB2,SSC5D,RNASE1,PLA2G2A
GO Process	GO:0055086	Nucleobase-containing small molecule metabolic process	22	567	0.45	0.0019	9606.ENSP00000252804,9606.ENSP00000253382,9606.ENSP00000322706,9606.ENSP00000332073,9606.ENSP00000339933,9606.ENSP00000349860,9606.ENSP00000356790,9606.ENSP00000362413,9606.ENSP00000370517,9606.ENSP00000373918,9606.ENSP00000379839,9606.ENSP00000380070,9606.ENSP00000382595,9606.ENSP00000402608,9606.ENSP00000419851,9606.ENSP00000425809,9606.ENSP00000443965,9606.ENSP00000445175,9606.ENSP00000474090,…	PXDN,ACSS2,HMGCS1,MGAT1,PKLR,GFPT1,ATP1B1,PGK1,PFKP,GARS1,GNE,GAPDH,PAICS,CPS1,GMPS,PGM3,ADK,LDHA,UPP2,ENO1,MTHFD1,AMPD2
GO Process	GO:0055001	Muscle cell development	11	160	0.69	0.002	9606.ENSP00000222271,9606.ENSP00000279022,9606.ENSP00000309953,9606.ENSP00000316779,9606.ENSP00000327145,9606.ENSP00000355124,9606.ENSP00000355627,9606.ENSP00000357283,9606.ENSP00000467141,9606.ENSP00000491215,9606.ENSP00000498587	COMP,MYL9,EFEMP2,BIN1,FLNC,KRT19,AGT,LMNA,TTN,HNRNPU,NOTCH1
GO Process	GO:0006869	Lipid transport	16	329	0.54	0.002	9606.ENSP00000200676,9606.ENSP00000205948,9606.ENSP00000217407,9606.ENSP00000227667,9606.ENSP00000233242,9606.ENSP00000236850,9606.ENSP00000262418,9606.ENSP00000315130,9606.ENSP00000317674,9606.ENSP00000333203,9606.ENSP00000366109,9606.ENSP00000381250,9606.ENSP00000383364,9606.ENSP00000417138,9606.ENSP00000466775,9606.ENSP00000468236	CETP,APOH,LBP,APOC3,APOB,APOA1,SLC4A1,CLU,APOL1,SERPINA5,ANXA1,APOF,PLA2G2A,PLTP,APOC2,APOC4
GO Process	GO:0022607	Cellular component assembly	59	2467	0.24	0.002	9606.ENSP00000167586,9606.ENSP00000212355,9606.ENSP00000217133,9606.ENSP00000222271,9606.ENSP00000222399,9606.ENSP00000226218,9606.ENSP00000227667,9606.ENSP00000233242,9606.ENSP00000236850,9606.ENSP00000252242,9606.ENSP00000252244,9606.ENSP00000252804,9606.ENSP00000255040,9606.ENSP00000257192,9606.ENSP00000258341,9606.ENSP00000262306,9606.ENSP00000263408,9606.ENSP00000263710,9606.ENSP00000268603,…	KRT14,TGFBR3,TUBB1,COMP,LAMB1,VTN,APOC3,APOB,APOA1,KRT5,KRT1,PXDN,APCS,DSG1,LAMC1,ELOB,C9,CLASP1,CDH11,KRT10,MYL9,FERMT3,APP,KPNB1,HSPA4,EFEMP2,LTBP4,PAK2,CLU,TLN1,BIN1,CALR,SPOCK2,EHD3,FLNC,ANG,CORO1B,DNM3,DYNC1H1,SPTBN1,DCTN1,KRT19,LMNA,EPS15,MATN1,PTPRD,FSCN1,XRCC5,PDCD10,CXCL12,LCP1,RPS14,PSTPIP2,RAB1A,PRNP,TNXB,ITGB3,TTN,NOTCH1
GO Process	GO:0030855	Epithelial cell differentiation	23	617	0.43	0.0021	9606.ENSP00000167586,9606.ENSP00000246635,9606.ENSP00000252242,9606.ENSP00000252244,9606.ENSP00000256646,9606.ENSP00000268182,9606.ENSP00000269576,9606.ENSP00000302486,9606.ENSP00000310861,9606.ENSP00000329243,9606.ENSP00000342710,9606.ENSP00000352798,9606.ENSP00000355124,9606.ENSP00000358035,9606.ENSP00000362413,9606.ENSP00000366109,9606.ENSP00000369129,9606.ENSP00000369317,9606.ENSP00000402608,…	KRT14,KRT13,KRT5,KRT1,NOTCH2,IQGAP1,KRT10,MAP2K1,KRT2,KRT7,KRT77,COL18A1,KRT19,ADAMTSL4,PGK1,ANXA1,DSP,KRT6A,CPS1,FLNB,VIM,PTPRS,NOTCH1
GO Process	GO:0044281	Small molecule metabolic process	44	1645	0.28	0.0021	9606.ENSP00000200676,9606.ENSP00000222381,9606.ENSP00000233242,9606.ENSP00000236850,9606.ENSP00000241052,9606.ENSP00000244137,9606.ENSP00000245907,9606.ENSP00000252804,9606.ENSP00000253382,9606.ENSP00000261772,9606.ENSP00000270776,9606.ENSP00000273450,9606.ENSP00000284981,9606.ENSP00000317674,9606.ENSP00000322706,9606.ENSP00000332073,9606.ENSP00000339933,9606.ENSP00000349860,9606.ENSP00000355518,…	CETP,PON1,APOB,APOA1,CAT,PEPD,C3,PXDN,ACSS2,AARS1,PGD,ALDH1L1,APP,APOL1,HMGCS1,MGAT1,PKLR,GFPT1,FH,ACAT2,ATP1B1,MINPP1,PGK1,PSAT1,PFKP,UROC1,GARS1,GNE,GAPDH,APOF,PAICS,CPS1,TNXB,PLTP,GMPS,GC,PGM3,ADK,LDHA,GALK2,UPP2,ENO1,MTHFD1,AMPD2
GO Process	GO:0070328	Triglyceride homeostasis	6	38	1.06	0.0022	9606.ENSP00000200676,9606.ENSP00000227667,9606.ENSP00000236850,9606.ENSP00000371497,9606.ENSP00000466775,9606.ENSP00000468236	CETP,APOC3,APOA1,C1QTNF3,APOC2,APOC4
GO Process	GO:0031589	Cell-substrate adhesion	12	195	0.65	0.0024	9606.ENSP00000222399,9606.ENSP00000226218,9606.ENSP00000258341,9606.ENSP00000261405,9606.ENSP00000262407,9606.ENSP00000264187,9606.ENSP00000279227,9606.ENSP00000308893,9606.ENSP00000357362,9606.ENSP00000387286,9606.ENSP00000407685,9606.ENSP00000452786	LAMB1,VTN,LAMC1,VWF,ITGA2B,NID1,FERMT3,SNED1,THBS3,RAB1A,TNXB,ITGB3
GO Process	GO:0030199	Collagen fibril organization	7	59	0.93	0.0025	9606.ENSP00000222271,9606.ENSP00000252804,9606.ENSP00000266718,9606.ENSP00000297848,9606.ENSP00000325146,9606.ENSP00000360882,9606.ENSP00000407685	COMP,PXDN,LUM,COL14A1,COL12A1,COL5A1,TNXB
GO Process	GO:0051702	Biological process involved in interaction with symbiont	9	108	0.78	0.0026	9606.ENSP00000232003,9606.ENSP00000255040,9606.ENSP00000286713,9606.ENSP00000296435,9606.ENSP00000308541,9606.ENSP00000317674,9606.ENSP00000369317,9606.ENSP00000380070,9606.ENSP00000481029	HRG,APCS,STOM,CAMP,F2,APOL1,KRT6A,GAPDH,PSMC3
GO Process	GO:0007097	Nuclear migration	5	23	1.19	0.0027	9606.ENSP00000258201,9606.ENSP00000305699,9606.ENSP00000348965,9606.ENSP00000354791,9606.ENSP00000357283	FHOD1,HOOK3,DYNC1H1,DCTN1,LMNA
GO Process	GO:0090207	Regulation of triglyceride metabolic process	6	40	1.03	0.0028	9606.ENSP00000227667,9606.ENSP00000230036,9606.ENSP00000236850,9606.ENSP00000245907,9606.ENSP00000419260,9606.ENSP00000466775	APOC3,GPLD1,APOA1,C3,PIK3CG,APOC2
GO Process	GO:0019220	Regulation of phosphate metabolic process	39	1405	0.3	0.0028	9606.ENSP00000226218,9606.ENSP00000230036,9606.ENSP00000232003,9606.ENSP00000236850,9606.ENSP00000245907,9606.ENSP00000260356,9606.ENSP00000262418,9606.ENSP00000263025,9606.ENSP00000265983,9606.ENSP00000268182,9606.ENSP00000284981,9606.ENSP00000296435,9606.ENSP00000298510,9606.ENSP00000302486,9606.ENSP00000308541,9606.ENSP00000312999,9606.ENSP00000314067,9606.ENSP00000315130,9606.ENSP00000336762,…	VTN,GPLD1,HRG,APOA1,C3,THBS1,SLC4A1,MAPK3,HPX,IQGAP1,APP,CAMP,PRDX3,MAP2K1,F2,GNAI2,PAK2,CLU,ANG,AGT,NIBAN1,IPO7,XRCC5,PDCD10,TF,PPP1R12A,RELN,CORO1C,PRNP,TNXB,PTPRC,PIK3CG,ITGB3,APOC2,TTN,PTPN11,HNRNPU,ENO1,SNX6
GO Process	GO:0048708	Astrocyte differentiation	7	61	0.92	0.003	9606.ENSP00000263025,9606.ENSP00000284981,9606.ENSP00000302486,9606.ENSP00000384109,9606.ENSP00000446007,9606.ENSP00000489597,9606.ENSP00000498587	MAPK3,APP,MAP2K1,CUL4B,VIM,PTPN11,NOTCH1
GO Process	GO:0032368	Regulation of lipid transport	10	139	0.71	0.003	9606.ENSP00000200676,9606.ENSP00000222381,9606.ENSP00000227667,9606.ENSP00000236850,9606.ENSP00000260356,9606.ENSP00000355627,9606.ENSP00000417138,9606.ENSP00000452786,9606.ENSP00000466775,9606.ENSP00000489597	CETP,PON1,APOC3,APOA1,THBS1,AGT,PLTP,ITGB3,APOC2,PTPN11
GO Process	GO:0010594	Regulation of endothelial cell migration	11	169	0.67	0.003	9606.ENSP00000205948,9606.ENSP00000230036,9606.ENSP00000232003,9606.ENSP00000260356,9606.ENSP00000320866,9606.ENSP00000355627,9606.ENSP00000366109,9606.ENSP00000376506,9606.ENSP00000419260,9606.ENSP00000452786,9606.ENSP00000498587	APOH,GPLD1,HRG,THBS1,CALR,AGT,ANXA1,PDCD10,PIK3CG,ITGB3,NOTCH1
GO Process	GO:0030036	Actin cytoskeleton organization	21	547	0.44	0.003	9606.ENSP00000225655,9606.ENSP00000258201,9606.ENSP00000279022,9606.ENSP00000303908,9606.ENSP00000316029,9606.ENSP00000320866,9606.ENSP00000327145,9606.ENSP00000336762,9606.ENSP00000340211,9606.ENSP00000349259,9606.ENSP00000355124,9606.ENSP00000366109,9606.ENSP00000371798,9606.ENSP00000381581,9606.ENSP00000385834,9606.ENSP00000387261,9606.ENSP00000394496,9606.ENSP00000407685,9606.ENSP00000420213,…	PFN1,FHOD1,MYL9,TWF2,TLN1,CALR,FLNC,ANG,CORO1B,SPTBN1,KRT19,ANXA1,FSCN1,LCP1,TF,PSTPIP2,CORO1C,TNXB,FLNB,TTN,SPTAN1
GO Process	GO:0060020	Bergmann glial cell differentiation	4	11	1.42	0.0031	9606.ENSP00000263025,9606.ENSP00000302486,9606.ENSP00000446007,9606.ENSP00000489597	MAPK3,MAP2K1,VIM,PTPN11
GO Process	GO:0110011	Regulation of basement membrane organization	4	11	1.42	0.0031	9606.ENSP00000222399,9606.ENSP00000258341,9606.ENSP00000263710,9606.ENSP00000264187	LAMB1,LAMC1,CLASP1,NID1
GO Process	GO:1990535	Neuron projection maintenance	4	11	1.42	0.0031	9606.ENSP00000284981,9606.ENSP00000354791,9606.ENSP00000399376,9606.ENSP00000444688	APP,DCTN1,PRNP,ATP1A3
GO Process	GO:0072378	Blood coagulation, fibrin clot formation	5	24	1.18	0.0031	9606.ENSP00000205948,9606.ENSP00000218099,9606.ENSP00000253496,9606.ENSP00000308541,9606.ENSP00000364709	APOH,F9,F12,F2,F10
GO Process	GO:0043933	Protein-containing complex organization	40	1465	0.29	0.0031	9606.ENSP00000200676,9606.ENSP00000212355,9606.ENSP00000222271,9606.ENSP00000226218,9606.ENSP00000227667,9606.ENSP00000233242,9606.ENSP00000236850,9606.ENSP00000252242,9606.ENSP00000252244,9606.ENSP00000252804,9606.ENSP00000255040,9606.ENSP00000258341,9606.ENSP00000262306,9606.ENSP00000263408,9606.ENSP00000263710,9606.ENSP00000269576,9606.ENSP00000279227,9606.ENSP00000284981,9606.ENSP00000302961,…	CETP,TGFBR3,COMP,VTN,APOC3,APOB,APOA1,KRT5,KRT1,PXDN,APCS,LAMC1,ELOB,C9,CLASP1,KRT10,FERMT3,APP,HSPA4,TWF2,CLU,TLN1,BIN1,CALR,EHD3,ANG,AGT,EPS15,MATN1,XRCC5,CXCL12,NSF,PLA2G2A,RPS14,PSTPIP2,GSPT1,PRNP,PLTP,APOC2,TTN
GO Process	GO:0071363	Cellular response to growth factor stimulus	19	473	0.46	0.0038	9606.ENSP00000212355,9606.ENSP00000222271,9606.ENSP00000241052,9606.ENSP00000256646,9606.ENSP00000260356,9606.ENSP00000263025,9606.ENSP00000268182,9606.ENSP00000284981,9606.ENSP00000288266,9606.ENSP00000303908,9606.ENSP00000311905,9606.ENSP00000314067,9606.ENSP00000318195,9606.ENSP00000340211,9606.ENSP00000366109,9606.ENSP00000402608,9606.ENSP00000452786,9606.ENSP00000489597,9606.ENSP00000498587	TGFBR3,COMP,CAT,NOTCH2,THBS1,MAPK3,IQGAP1,APP,APPL1,TWF2,LTBP4,PAK2,NCL,CORO1B,ANXA1,CPS1,ITGB3,PTPN11,NOTCH1
GO Process	GO:0030029	Actin filament-based process	22	609	0.41	0.0045	9606.ENSP00000225655,9606.ENSP00000258201,9606.ENSP00000279022,9606.ENSP00000303908,9606.ENSP00000316029,9606.ENSP00000320866,9606.ENSP00000327145,9606.ENSP00000336762,9606.ENSP00000340211,9606.ENSP00000349259,9606.ENSP00000349320,9606.ENSP00000355124,9606.ENSP00000366109,9606.ENSP00000371798,9606.ENSP00000381581,9606.ENSP00000385834,9606.ENSP00000387261,9606.ENSP00000394496,9606.ENSP00000407685,…	PFN1,FHOD1,MYL9,TWF2,TLN1,CALR,FLNC,ANG,CORO1B,SPTBN1,CACNA2D1,KRT19,ANXA1,FSCN1,LCP1,TF,PSTPIP2,CORO1C,TNXB,FLNB,TTN,SPTAN1
GO Process	GO:0008544	Epidermis development	15	320	0.53	0.0046	9606.ENSP00000167586,9606.ENSP00000252242,9606.ENSP00000252244,9606.ENSP00000269576,9606.ENSP00000302486,9606.ENSP00000310861,9606.ENSP00000329243,9606.ENSP00000342710,9606.ENSP00000363593,9606.ENSP00000366109,9606.ENSP00000369129,9606.ENSP00000369317,9606.ENSP00000373370,9606.ENSP00000420213,9606.ENSP00000498587	KRT14,KRT5,KRT1,KRT10,MAP2K1,KRT2,KRT7,KRT77,SVEP1,ANXA1,DSP,KRT6A,FLG2,FLNB,NOTCH1
GO Process	GO:0030154	Cell differentiation	75	3507	0.19	0.0047	9606.ENSP00000167586,9606.ENSP00000212355,9606.ENSP00000222271,9606.ENSP00000222399,9606.ENSP00000226218,9606.ENSP00000230036,9606.ENSP00000241052,9606.ENSP00000245907,9606.ENSP00000246635,9606.ENSP00000252242,9606.ENSP00000252244,9606.ENSP00000256646,9606.ENSP00000258341,9606.ENSP00000262418,9606.ENSP00000263025,9606.ENSP00000263388,9606.ENSP00000265131,9606.ENSP00000268182,9606.ENSP00000268603,…	KRT14,TGFBR3,COMP,LAMB1,VTN,GPLD1,CAT,C3,KRT13,KRT5,KRT1,NOTCH2,LAMC1,SLC4A1,MAPK3,NOTCH3,TNC,IQGAP1,CDH11,KRT10,MYL9,FERMT3,APP,PKDCC,PRDX3,MAP2K1,LRG1,NPTX1,EFEMP2,KRT2,PAK2,CLU,BIN1,CALR,A2M,COL12A1,FLNC,KRT7,ANG,KRT77,RPL22,COL18A1,KRT19,COL6A1,AGT,LMNA,ADAMTSL4,NIBAN2,PGK1,MATN1,HSPG2,ANXA1,DSP,KRT6A,PTPRD,C1QTNF3,SERPINB12,XRCC5,CXCL12,CUL4B,TF,RPS14,RAB1A,RELN,CORO1C,CPS1,PTPRC,FLNB,VIM,IT…
GO Process	GO:0008203	Cholesterol metabolic process	9	119	0.74	0.0048	9606.ENSP00000200676,9606.ENSP00000222381,9606.ENSP00000233242,9606.ENSP00000236850,9606.ENSP00000241052,9606.ENSP00000284981,9606.ENSP00000317674,9606.ENSP00000322706,9606.ENSP00000381250	CETP,PON1,APOB,APOA1,CAT,APP,APOL1,HMGCS1,APOF
GO Process	GO:0070374	Positive regulation of ERK1 and ERK2 cascade	12	213	0.61	0.0048	9606.ENSP00000256646,9606.ENSP00000263025,9606.ENSP00000284981,9606.ENSP00000302486,9606.ENSP00000312999,9606.ENSP00000383364,9606.ENSP00000411355,9606.ENSP00000452786,9606.ENSP00000479097,9606.ENSP00000479955,9606.ENSP00000489597,9606.ENSP00000498587	NOTCH2,MAPK3,APP,MAP2K1,GNAI2,PLA2G2A,PTPRC,ITGB3,CCL14,CCL18,PTPN11,NOTCH1
GO Process	GO:0048468	Cell development	44	1719	0.26	0.0051	9606.ENSP00000212355,9606.ENSP00000222271,9606.ENSP00000222399,9606.ENSP00000245907,9606.ENSP00000256646,9606.ENSP00000258341,9606.ENSP00000262418,9606.ENSP00000263025,9606.ENSP00000263388,9606.ENSP00000265131,9606.ENSP00000268182,9606.ENSP00000268603,9606.ENSP00000279022,9606.ENSP00000279227,9606.ENSP00000284981,9606.ENSP00000307549,9606.ENSP00000309953,9606.ENSP00000310861,9606.ENSP00000314067,…	TGFBR3,COMP,LAMB1,C3,NOTCH2,LAMC1,SLC4A1,MAPK3,NOTCH3,TNC,IQGAP1,CDH11,MYL9,FERMT3,APP,NPTX1,EFEMP2,KRT2,PAK2,CLU,BIN1,FLNC,ANG,COL18A1,KRT19,AGT,LMNA,ADAMTSL4,NIBAN2,MATN1,CXCL12,CUL4B,RAB1A,RELN,CORO1C,PTPRC,FLNB,VIM,ITGB3,TTN,PTPRS,PTPN11,HNRNPU,NOTCH1
GO Process	GO:0006096	Glycolytic process	6	46	0.97	0.0052	9606.ENSP00000339933,9606.ENSP00000362413,9606.ENSP00000370517,9606.ENSP00000380070,9606.ENSP00000445175,9606.ENSP00000495530	PKLR,PGK1,PFKP,GAPDH,LDHA,ENO1
GO Process	GO:0048585	Negative regulation of response to stimulus	42	1612	0.27	0.0052	9606.ENSP00000205948,9606.ENSP00000212355,9606.ENSP00000223642,9606.ENSP00000226218,9606.ENSP00000232003,9606.ENSP00000236850,9606.ENSP00000252244,9606.ENSP00000252804,9606.ENSP00000253354,9606.ENSP00000253496,9606.ENSP00000255040,9606.ENSP00000260356,9606.ENSP00000263710,9606.ENSP00000284981,9606.ENSP00000288266,9606.ENSP00000301522,9606.ENSP00000308541,9606.ENSP00000312999,9606.ENSP00000315130,…	APOH,TGFBR3,C5,VTN,HRG,APOA1,KRT1,PXDN,BPIFB1,F12,APCS,THBS1,CLASP1,APP,APPL1,PRDX2,F2,GNAI2,CLU,CALR,A2M,CORO1B,ADAMTSL2,PCBP2,AGT,LMNA,NIBAN2,ATF6B,ANXA1,PTPRD,C1QTNF3,PROS1,CXCL12,PRNP,PTPRC,FBN2,OTUB1,PTPRS,KNG1,ENO1,NOTCH1,SNX6
GO Process	GO:0032956	Regulation of actin cytoskeleton organization	16	365	0.5	0.0054	9606.ENSP00000225655,9606.ENSP00000232003,9606.ENSP00000236850,9606.ENSP00000256646,9606.ENSP00000258201,9606.ENSP00000263710,9606.ENSP00000268182,9606.ENSP00000303908,9606.ENSP00000314067,9606.ENSP00000316779,9606.ENSP00000340211,9606.ENSP00000349259,9606.ENSP00000371798,9606.ENSP00000379140,9606.ENSP00000452786,9606.ENSP00000487444	PFN1,HRG,APOA1,NOTCH2,FHOD1,CLASP1,IQGAP1,TWF2,PAK2,BIN1,CORO1B,SPTBN1,FSCN1,CXCL12,ITGB3,SPTAN1
GO Process	GO:1903055	Positive regulation of extracellular matrix organization	5	28	1.11	0.0055	9606.ENSP00000263710,9606.ENSP00000309953,9606.ENSP00000355627,9606.ENSP00000371798,9606.ENSP00000407685	CLASP1,EFEMP2,AGT,FSCN1,TNXB
GO Process	GO:0032970	Regulation of actin filament-based process	17	406	0.48	0.0055	9606.ENSP00000225655,9606.ENSP00000232003,9606.ENSP00000236850,9606.ENSP00000256646,9606.ENSP00000258201,9606.ENSP00000263710,9606.ENSP00000268182,9606.ENSP00000303908,9606.ENSP00000314067,9606.ENSP00000316779,9606.ENSP00000340211,9606.ENSP00000349259,9606.ENSP00000369129,9606.ENSP00000371798,9606.ENSP00000379140,9606.ENSP00000452786,9606.ENSP00000487444	PFN1,HRG,APOA1,NOTCH2,FHOD1,CLASP1,IQGAP1,TWF2,PAK2,BIN1,CORO1B,SPTBN1,DSP,FSCN1,CXCL12,ITGB3,SPTAN1
GO Process	GO:0051172	Negative regulation of nitrogen compound metabolic process	56	2403	0.22	0.0056	9606.ENSP00000215727,9606.ENSP00000223357,9606.ENSP00000223642,9606.ENSP00000226218,9606.ENSP00000232003,9606.ENSP00000245907,9606.ENSP00000255040,9606.ENSP00000256646,9606.ENSP00000260356,9606.ENSP00000262418,9606.ENSP00000263388,9606.ENSP00000265462,9606.ENSP00000271638,9606.ENSP00000273283,9606.ENSP00000284981,9606.ENSP00000295550,9606.ENSP00000298510,9606.ENSP00000308541,9606.ENSP00000312999,…	SERPIND1,AEBP1,C5,VTN,HRG,C3,APCS,NOTCH2,THBS1,SLC4A1,NOTCH3,PRDX5,S100A11,ITIH1,APP,COL6A3,PRDX3,F2,GNAI2,PAK2,CLU,BIN1,NCL,CALR,SPOCK2,A2M,SERPINA5,ANG,SERPINA6,ITIH2,FH,AGT,NIBAN1,NIBAN2,HSPG2,RPS6KA3,IPO7,SERPINB12,SERPINB5,XRCC5,PROS1,GAPDH,RPS14,CORO1C,PRNP,PTPRC,C4B,SERPINA1,OTUB1,SERPINA3,ITGB3,HNRNPU,KNG1,ENO1,NOTCH1,SNX6
GO Process	GO:2001027	Negative regulation of endothelial cell chemotaxis	3	4	1.73	0.0057	9606.ENSP00000232003,9606.ENSP00000260356,9606.ENSP00000498587	HRG,THBS1,NOTCH1
GO Process	GO:0006810	Transport	79	3785	0.18	0.0059	9606.ENSP00000200676,9606.ENSP00000205948,9606.ENSP00000207549,9606.ENSP00000217407,9606.ENSP00000222271,9606.ENSP00000226218,9606.ENSP00000226355,9606.ENSP00000227667,9606.ENSP00000230036,9606.ENSP00000232003,9606.ENSP00000233242,9606.ENSP00000236850,9606.ENSP00000247461,9606.ENSP00000258201,9606.ENSP00000260356,9606.ENSP00000262418,9606.ENSP00000262776,9606.ENSP00000263025,9606.ENSP00000263710,…	CETP,APOH,UNC13D,LBP,COMP,VTN,AFM,APOC3,GPLD1,HRG,APOB,APOA1,CANX,FHOD1,THBS1,SLC4A1,LGALS3BP,MAPK3,CLASP1,CP,HPX,APP,APPL1,KPNB1,FCN2,AZGP1,PKDCC,HSPA4,HOOK3,NPTX1,LTBP4,STAB1,CLU,BIN1,APOL1,CALR,EHD3,HHIPL1,SERPINA5,DNM3,DYNC1H1,SPTBN1,CACNA2D1,DCTN1,AGT,ATP1B1,LMNA,EPS15,FCN1,NIBAN2,HSPG2,ANXA1,CLSTN1,IPO7,KRT18,STAB2,SSC5D,SEC31A,APOF,NSF,PLA2G2A,TF,RAB1A,PCYOX1,CORO1C,PTPRC,PLTP,PIK3CG,GC,AT…
GO Process	GO:0006047	UDP-N-acetylglucosamine metabolic process	4	14	1.31	0.006	9606.ENSP00000332073,9606.ENSP00000349860,9606.ENSP00000379839,9606.ENSP00000425809	MGAT1,GFPT1,GNE,PGM3
GO Process	GO:0009719	Response to endogenous stimulus	37	1363	0.29	0.0062	9606.ENSP00000212355,9606.ENSP00000222271,9606.ENSP00000230036,9606.ENSP00000233242,9606.ENSP00000241052,9606.ENSP00000256646,9606.ENSP00000257192,9606.ENSP00000260356,9606.ENSP00000263025,9606.ENSP00000268182,9606.ENSP00000284981,9606.ENSP00000288266,9606.ENSP00000296435,9606.ENSP00000311905,9606.ENSP00000314067,9606.ENSP00000318195,9606.ENSP00000320866,9606.ENSP00000323929,9606.ENSP00000336762,…	TGFBR3,COMP,GPLD1,APOB,CAT,NOTCH2,DSG1,THBS1,MAPK3,IQGAP1,APP,APPL1,CAMP,LTBP4,PAK2,NCL,CALR,A2M,ANG,PKLR,CORO1B,CACNA2D1,KRT19,COL6A1,AGT,ANXA1,CXCL12,PRNP,CPS1,PIK3CG,ATP1A3,VIM,ITGB3,PTPN11,HNRNPU,NOTCH1,SNX6
GO Process	GO:0071310	Cellular response to organic substance	49	2019	0.24	0.0065	9606.ENSP00000212355,9606.ENSP00000217407,9606.ENSP00000222271,9606.ENSP00000230036,9606.ENSP00000233242,9606.ENSP00000241052,9606.ENSP00000252590,9606.ENSP00000256646,9606.ENSP00000260356,9606.ENSP00000263025,9606.ENSP00000265983,9606.ENSP00000268182,9606.ENSP00000284981,9606.ENSP00000288266,9606.ENSP00000296435,9606.ENSP00000303908,9606.ENSP00000307549,9606.ENSP00000311713,9606.ENSP00000311905,…	TGFBR3,LBP,COMP,GPLD1,APOB,CAT,PLVAP,NOTCH2,THBS1,MAPK3,HPX,IQGAP1,APP,APPL1,CAMP,TWF2,NPTX1,OXSR1,LTBP4,PAK2,NCL,CALR,SPOCK2,PKLR,CORO1B,CACNA2D1,COL6A1,AGT,ATF6B,ANXA1,PFKP,KRT18,XRCC5,PDCD10,CXCL12,GAPDH,PRNP,CPS1,PIK3CG,FLNB,ATP1A3,VIM,ITGB3,CCL14,CCL18,PTPN11,HNRNPU,NOTCH1,SNX6
GO Process	GO:0051493	Regulation of cytoskeleton organization	20	541	0.42	0.0066	9606.ENSP00000225655,9606.ENSP00000232003,9606.ENSP00000236850,9606.ENSP00000256646,9606.ENSP00000258201,9606.ENSP00000263025,9606.ENSP00000263710,9606.ENSP00000268182,9606.ENSP00000303908,9606.ENSP00000314067,9606.ENSP00000316779,9606.ENSP00000340211,9606.ENSP00000348965,9606.ENSP00000349259,9606.ENSP00000354791,9606.ENSP00000371798,9606.ENSP00000379140,9606.ENSP00000452786,9606.ENSP00000487444,…	PFN1,HRG,APOA1,NOTCH2,FHOD1,MAPK3,CLASP1,IQGAP1,TWF2,PAK2,BIN1,CORO1B,DYNC1H1,SPTBN1,DCTN1,FSCN1,CXCL12,ITGB3,SPTAN1,HNRNPU
GO Process	GO:0045937	Positive regulation of phosphate metabolic process	28	912	0.34	0.0066	9606.ENSP00000226218,9606.ENSP00000230036,9606.ENSP00000245907,9606.ENSP00000260356,9606.ENSP00000263025,9606.ENSP00000265983,9606.ENSP00000268182,9606.ENSP00000284981,9606.ENSP00000296435,9606.ENSP00000302486,9606.ENSP00000308541,9606.ENSP00000314067,9606.ENSP00000315130,9606.ENSP00000336762,9606.ENSP00000355627,9606.ENSP00000356481,9606.ENSP00000375978,9606.ENSP00000376506,9606.ENSP00000385834,…	VTN,GPLD1,C3,THBS1,MAPK3,HPX,IQGAP1,APP,CAMP,MAP2K1,F2,PAK2,CLU,ANG,AGT,NIBAN1,XRCC5,PDCD10,TF,PPP1R12A,RELN,PRNP,PTPRC,PIK3CG,ITGB3,APOC2,PTPN11,ENO1
GO Process	GO:0019637	Organophosphate metabolic process	28	914	0.34	0.0068	9606.ENSP00000200676,9606.ENSP00000222381,9606.ENSP00000230036,9606.ENSP00000236850,9606.ENSP00000252804,9606.ENSP00000253382,9606.ENSP00000270776,9606.ENSP00000322706,9606.ENSP00000339933,9606.ENSP00000349860,9606.ENSP00000356790,9606.ENSP00000361064,9606.ENSP00000362413,9606.ENSP00000370517,9606.ENSP00000373918,9606.ENSP00000380070,9606.ENSP00000382595,9606.ENSP00000383364,9606.ENSP00000391481,…	CETP,PON1,GPLD1,APOA1,PXDN,ACSS2,PGD,HMGCS1,PKLR,GFPT1,ATP1B1,MINPP1,PGK1,PFKP,GARS1,GAPDH,PAICS,PLA2G2A,TKT,CPS1,PIK3CG,GMPS,ADK,LDHA,UPP2,ENO1,MTHFD1,AMPD2
GO Process	GO:0032369	Negative regulation of lipid transport	5	30	1.08	0.0069	9606.ENSP00000227667,9606.ENSP00000260356,9606.ENSP00000452786,9606.ENSP00000466775,9606.ENSP00000489597	APOC3,THBS1,ITGB3,APOC2,PTPN11
GO Process	GO:0061097	Regulation of protein tyrosine kinase activity	8	99	0.76	0.0073	9606.ENSP00000284981,9606.ENSP00000314067,9606.ENSP00000355627,9606.ENSP00000392423,9606.ENSP00000399376,9606.ENSP00000411355,9606.ENSP00000452786,9606.ENSP00000498872	APP,PAK2,AGT,RELN,PRNP,PTPRC,ITGB3,SNX6
GO Process	GO:0010811	Positive regulation of cell-substrate adhesion	9	128	0.7	0.0074	9606.ENSP00000207549,9606.ENSP00000226218,9606.ENSP00000232003,9606.ENSP00000236850,9606.ENSP00000264187,9606.ENSP00000309953,9606.ENSP00000320866,9606.ENSP00000321108,9606.ENSP00000452786	UNC13D,VTN,HRG,APOA1,NID1,EFEMP2,CALR,SPOCK2,ITGB3
GO Process	GO:0010743	Regulation of macrophage derived foam cell differentiation	5	31	1.06	0.0077	9606.ENSP00000200676,9606.ENSP00000233242,9606.ENSP00000355627,9606.ENSP00000383364,9606.ENSP00000452786	CETP,APOB,AGT,PLA2G2A,ITGB3
GO Process	GO:0001906	Cell killing	9	129	0.7	0.0077	9606.ENSP00000207549,9606.ENSP00000245907,9606.ENSP00000262746,9606.ENSP00000263408,9606.ENSP00000308541,9606.ENSP00000379140,9606.ENSP00000380070,9606.ENSP00000479955,9606.ENSP00000493985	UNC13D,C3,PRDX1,C9,F2,CXCL12,GAPDH,CCL18,KNG1
GO Process	GO:0044087	Regulation of cellular component biogenesis	29	971	0.33	0.0077	9606.ENSP00000225655,9606.ENSP00000232003,9606.ENSP00000236850,9606.ENSP00000258201,9606.ENSP00000260356,9606.ENSP00000263710,9606.ENSP00000284981,9606.ENSP00000303908,9606.ENSP00000307549,9606.ENSP00000314067,9606.ENSP00000315130,9606.ENSP00000316029,9606.ENSP00000316779,9606.ENSP00000347457,9606.ENSP00000348965,9606.ENSP00000349259,9606.ENSP00000354791,9606.ENSP00000355627,9606.ENSP00000366513,…	PFN1,HRG,APOA1,FHOD1,THBS1,CLASP1,APP,TWF2,NPTX1,PAK2,CLU,TLN1,BIN1,DNM3,DYNC1H1,SPTBN1,DCTN1,AGT,CLSTN1,PTPRD,FSCN1,XRCC5,LCP1,CORO1C,PTPRS,SPTAN1,PTPN11,HNRNPU,NOTCH1
GO Process	GO:0010897	Negative regulation of triglyceride catabolic process	3	5	1.63	0.0084	9606.ENSP00000227667,9606.ENSP00000230036,9606.ENSP00000419260	APOC3,GPLD1,PIK3CG
GO Process	GO:0034374	Low-density lipoprotein particle remodeling	4	16	1.25	0.0087	9606.ENSP00000200676,9606.ENSP00000233242,9606.ENSP00000355627,9606.ENSP00000383364	CETP,APOB,AGT,PLA2G2A
GO Process	GO:0034375	High-density lipoprotein particle remodeling	4	16	1.25	0.0087	9606.ENSP00000200676,9606.ENSP00000227667,9606.ENSP00000236850,9606.ENSP00000417138	CETP,APOC3,APOA1,PLTP
GO Process	GO:0016525	Negative regulation of angiogenesis	8	103	0.75	0.009	9606.ENSP00000205948,9606.ENSP00000232003,9606.ENSP00000260356,9606.ENSP00000312946,9606.ENSP00000355627,9606.ENSP00000362409,9606.ENSP00000362413,9606.ENSP00000363827	APOH,HRG,THBS1,STAB1,AGT,NIBAN2,PGK1,HSPG2
GO Process	GO:0001775	Cell activation	23	693	0.38	0.009	9606.ENSP00000207549,9606.ENSP00000217407,9606.ENSP00000222271,9606.ENSP00000232003,9606.ENSP00000256646,9606.ENSP00000261405,9606.ENSP00000262746,9606.ENSP00000279022,9606.ENSP00000279227,9606.ENSP00000284981,9606.ENSP00000296435,9606.ENSP00000301522,9606.ENSP00000308541,9606.ENSP00000310861,9606.ENSP00000315130,9606.ENSP00000316029,9606.ENSP00000346088,9606.ENSP00000366109,9606.ENSP00000381581,…	UNC13D,LBP,COMP,HRG,NOTCH2,VWF,PRDX1,MYL9,FERMT3,APP,CAMP,PRDX2,F2,KRT2,CLU,TLN1,RPL22,ANXA1,LCP1,PTPRC,PIK3CG,ITGB3,HBB
GO Process	GO:0006935	Chemotaxis	19	516	0.42	0.0096	9606.ENSP00000215727,9606.ENSP00000217407,9606.ENSP00000223642,9606.ENSP00000232003,9606.ENSP00000236850,9606.ENSP00000256646,9606.ENSP00000263388,9606.ENSP00000284981,9606.ENSP00000302486,9606.ENSP00000340211,9606.ENSP00000362409,9606.ENSP00000366109,9606.ENSP00000379140,9606.ENSP00000392423,9606.ENSP00000419260,9606.ENSP00000452786,9606.ENSP00000479097,9606.ENSP00000479955,9606.ENSP00000498587	SERPIND1,LBP,C5,HRG,APOA1,NOTCH2,NOTCH3,APP,MAP2K1,CORO1B,NIBAN2,ANXA1,CXCL12,RELN,PIK3CG,ITGB3,CCL14,CCL18,NOTCH1
GO Process	GO:0034248	Regulation of cellular amide metabolic process	19	516	0.42	0.0096	9606.ENSP00000246635,9606.ENSP00000260356,9606.ENSP00000261772,9606.ENSP00000262306,9606.ENSP00000284981,9606.ENSP00000315130,9606.ENSP00000316779,9606.ENSP00000318195,9606.ENSP00000320866,9606.ENSP00000336762,9606.ENSP00000346088,9606.ENSP00000356481,9606.ENSP00000368884,9606.ENSP00000380070,9606.ENSP00000385958,9606.ENSP00000398131,9606.ENSP00000399376,9606.ENSP00000446007,9606.ENSP00000491215	KRT13,THBS1,AARS1,ELOB,APP,CLU,BIN1,NCL,CALR,ANG,RPL22,NIBAN1,RPS6KA3,GAPDH,RPS14,GSPT1,PRNP,VIM,HNRNPU
GO Process	GO:0033043	Regulation of organelle organization	33	1190	0.3	0.0096	9606.ENSP00000225655,9606.ENSP00000232003,9606.ENSP00000236850,9606.ENSP00000256646,9606.ENSP00000258201,9606.ENSP00000263025,9606.ENSP00000263710,9606.ENSP00000268182,9606.ENSP00000284981,9606.ENSP00000302486,9606.ENSP00000303908,9606.ENSP00000307549,9606.ENSP00000314067,9606.ENSP00000315130,9606.ENSP00000316779,9606.ENSP00000320866,9606.ENSP00000327116,9606.ENSP00000340211,9606.ENSP00000348965,…	PFN1,HRG,APOA1,NOTCH2,FHOD1,MAPK3,CLASP1,IQGAP1,APP,MAP2K1,TWF2,NPTX1,PAK2,CLU,BIN1,CALR,EHD3,CORO1B,DYNC1H1,SPTBN1,DCTN1,LMNA,ANXA1,PTPRD,FSCN1,XRCC5,PDCD10,CXCL12,LCP1,ITGB3,PTPRS,SPTAN1,HNRNPU
GO Process	GO:0016192	Vesicle-mediated transport	35	1298	0.29	0.01	9606.ENSP00000207549,9606.ENSP00000226218,9606.ENSP00000247461,9606.ENSP00000260356,9606.ENSP00000262776,9606.ENSP00000263025,9606.ENSP00000263710,9606.ENSP00000284981,9606.ENSP00000291744,9606.ENSP00000305699,9606.ENSP00000312946,9606.ENSP00000316779,9606.ENSP00000327116,9606.ENSP00000330601,9606.ENSP00000347457,9606.ENSP00000349259,9606.ENSP00000354791,9606.ENSP00000360798,9606.ENSP00000360871,…	UNC13D,VTN,CANX,THBS1,LGALS3BP,MAPK3,CLASP1,APP,FCN2,HOOK3,STAB1,BIN1,EHD3,HHIPL1,DNM3,SPTBN1,DCTN1,EPS15,FCN1,HSPG2,ANXA1,CLSTN1,KRT18,STAB2,SSC5D,SEC31A,NSF,RAB1A,CORO1C,PIK3CG,ITGB3,IGHD,IGHV3-72,NOTCH1,SNX6
GO Process	GO:0044085	Cellular component biogenesis	60	2702	0.2	0.01	9606.ENSP00000167586,9606.ENSP00000212355,9606.ENSP00000217133,9606.ENSP00000222271,9606.ENSP00000222399,9606.ENSP00000226218,9606.ENSP00000227667,9606.ENSP00000233242,9606.ENSP00000236850,9606.ENSP00000252242,9606.ENSP00000252244,9606.ENSP00000252804,9606.ENSP00000255040,9606.ENSP00000257192,9606.ENSP00000258341,9606.ENSP00000262306,9606.ENSP00000263408,9606.ENSP00000263710,9606.ENSP00000268603,…	KRT14,TGFBR3,TUBB1,COMP,LAMB1,VTN,APOC3,APOB,APOA1,KRT5,KRT1,PXDN,APCS,DSG1,LAMC1,ELOB,C9,CLASP1,CDH11,KRT10,MYL9,FERMT3,APP,KPNB1,HSPA4,EFEMP2,LTBP4,PAK2,CLU,TLN1,BIN1,CALR,SPOCK2,EHD3,FLNC,ANG,CORO1B,DNM3,DYNC1H1,SPTBN1,DCTN1,KRT19,LMNA,EPS15,MATN1,PTPRD,FSCN1,XRCC5,PDCD10,CXCL12,LCP1,CUL4B,RPS14,PSTPIP2,RAB1A,PRNP,TNXB,ITGB3,TTN,NOTCH1
GO Process	GO:1903358	Regulation of Golgi organization	4	17	1.23	0.0101	9606.ENSP00000263025,9606.ENSP00000302486,9606.ENSP00000327116,9606.ENSP00000376506	MAPK3,MAP2K1,EHD3,PDCD10
GO Process	GO:1901888	Regulation of cell junction assembly	11	201	0.59	0.0102	9606.ENSP00000232003,9606.ENSP00000260356,9606.ENSP00000263710,9606.ENSP00000284981,9606.ENSP00000307549,9606.ENSP00000316029,9606.ENSP00000355627,9606.ENSP00000366513,9606.ENSP00000370593,9606.ENSP00000394496,9606.ENSP00000467537	HRG,THBS1,CLASP1,APP,NPTX1,TLN1,AGT,CLSTN1,PTPRD,CORO1C,PTPRS
GO Process	GO:0042325	Regulation of phosphorylation	34	1251	0.29	0.0106	9606.ENSP00000226218,9606.ENSP00000232003,9606.ENSP00000236850,9606.ENSP00000245907,9606.ENSP00000260356,9606.ENSP00000262418,9606.ENSP00000263025,9606.ENSP00000265983,9606.ENSP00000268182,9606.ENSP00000284981,9606.ENSP00000296435,9606.ENSP00000298510,9606.ENSP00000302486,9606.ENSP00000308541,9606.ENSP00000314067,9606.ENSP00000315130,9606.ENSP00000336762,9606.ENSP00000355627,9606.ENSP00000356481,…	VTN,HRG,APOA1,C3,THBS1,SLC4A1,MAPK3,HPX,IQGAP1,APP,CAMP,PRDX3,MAP2K1,F2,PAK2,CLU,ANG,AGT,NIBAN1,IPO7,XRCC5,PDCD10,TF,RELN,CORO1C,PRNP,TNXB,PTPRC,PIK3CG,ITGB3,TTN,PTPN11,HNRNPU,SNX6
GO Process	GO:0009156	Ribonucleoside monophosphate biosynthetic process	5	34	1.02	0.0107	9606.ENSP00000382595,9606.ENSP00000419851,9606.ENSP00000443965,9606.ENSP00000474090,9606.ENSP00000499465	PAICS,GMPS,ADK,UPP2,AMPD2
GO Process	GO:0090287	Regulation of cellular response to growth factor stimulus	14	314	0.51	0.0108	9606.ENSP00000212355,9606.ENSP00000226218,9606.ENSP00000232003,9606.ENSP00000256646,9606.ENSP00000260356,9606.ENSP00000302621,9606.ENSP00000311905,9606.ENSP00000346478,9606.ENSP00000355627,9606.ENSP00000362409,9606.ENSP00000424571,9606.ENSP00000452786,9606.ENSP00000498587,9606.ENSP00000498872	TGFBR3,VTN,HRG,NOTCH2,THBS1,LRG1,LTBP4,ADAMTSL2,AGT,NIBAN2,FBN2,ITGB3,NOTCH1,SNX6
GO Process	GO:1901652	Response to peptide	17	437	0.45	0.0109	9606.ENSP00000212355,9606.ENSP00000230036,9606.ENSP00000241052,9606.ENSP00000284981,9606.ENSP00000288266,9606.ENSP00000339933,9606.ENSP00000349320,9606.ENSP00000355627,9606.ENSP00000366109,9606.ENSP00000379140,9606.ENSP00000399376,9606.ENSP00000402608,9606.ENSP00000444688,9606.ENSP00000446007,9606.ENSP00000452786,9606.ENSP00000498587,9606.ENSP00000498872	TGFBR3,GPLD1,CAT,APP,APPL1,PKLR,CACNA2D1,AGT,ANXA1,CXCL12,PRNP,CPS1,ATP1A3,VIM,ITGB3,NOTCH1,SNX6
GO Process	GO:0010901	Regulation of very-low-density lipoprotein particle remodeling	3	6	1.56	0.0115	9606.ENSP00000227667,9606.ENSP00000236850,9606.ENSP00000466775	APOC3,APOA1,APOC2
GO Process	GO:0034097	Response to cytokine	25	804	0.35	0.0115	9606.ENSP00000233242,9606.ENSP00000252590,9606.ENSP00000260356,9606.ENSP00000263025,9606.ENSP00000265983,9606.ENSP00000284981,9606.ENSP00000288266,9606.ENSP00000296435,9606.ENSP00000311713,9606.ENSP00000318195,9606.ENSP00000321108,9606.ENSP00000366109,9606.ENSP00000370517,9606.ENSP00000373489,9606.ENSP00000375978,9606.ENSP00000376506,9606.ENSP00000379140,9606.ENSP00000380070,9606.ENSP00000420213,…	APOB,PLVAP,THBS1,MAPK3,HPX,APP,APPL1,CAMP,OXSR1,NCL,SPOCK2,ANXA1,PFKP,KRT18,XRCC5,PDCD10,CXCL12,GAPDH,FLNB,VIM,CCL14,CCL18,PTPN11,HNRNPU,NOTCH1
GO Process	GO:0051004	Regulation of lipoprotein lipase activity	4	18	1.2	0.0118	9606.ENSP00000205948,9606.ENSP00000227667,9606.ENSP00000236850,9606.ENSP00000466775	APOH,APOC3,APOA1,APOC2
GO Process	GO:0085029	Extracellular matrix assembly	5	35	1.01	0.0118	9606.ENSP00000222399,9606.ENSP00000252804,9606.ENSP00000309953,9606.ENSP00000311905,9606.ENSP00000407685	LAMB1,PXDN,EFEMP2,LTBP4,TNXB
GO Process	GO:0007492	Endoderm development	7	81	0.79	0.0118	9606.ENSP00000222399,9606.ENSP00000226218,9606.ENSP00000258341,9606.ENSP00000302486,9606.ENSP00000325146,9606.ENSP00000355180,9606.ENSP00000498587	LAMB1,VTN,LAMC1,MAP2K1,COL12A1,COL6A1,NOTCH1
GO Process	GO:0048259	Regulation of receptor-mediated endocytosis	8	109	0.72	0.0118	9606.ENSP00000226218,9606.ENSP00000227667,9606.ENSP00000245907,9606.ENSP00000284981,9606.ENSP00000315130,9606.ENSP00000385834,9606.ENSP00000452786,9606.ENSP00000466775	VTN,APOC3,C3,APP,CLU,TF,ITGB3,APOC2
GO Process	GO:0071345	Cellular response to cytokine stimulus	23	711	0.37	0.0118	9606.ENSP00000233242,9606.ENSP00000252590,9606.ENSP00000260356,9606.ENSP00000263025,9606.ENSP00000265983,9606.ENSP00000288266,9606.ENSP00000296435,9606.ENSP00000311713,9606.ENSP00000318195,9606.ENSP00000321108,9606.ENSP00000370517,9606.ENSP00000373489,9606.ENSP00000375978,9606.ENSP00000376506,9606.ENSP00000379140,9606.ENSP00000380070,9606.ENSP00000420213,9606.ENSP00000446007,9606.ENSP00000479097,…	APOB,PLVAP,THBS1,MAPK3,HPX,APPL1,CAMP,OXSR1,NCL,SPOCK2,PFKP,KRT18,XRCC5,PDCD10,CXCL12,GAPDH,FLNB,VIM,CCL14,CCL18,PTPN11,HNRNPU,NOTCH1
GO Process	GO:0048878	Chemical homeostasis	27	904	0.33	0.0118	9606.ENSP00000200676,9606.ENSP00000227667,9606.ENSP00000233242,9606.ENSP00000236850,9606.ENSP00000252244,9606.ENSP00000262418,9606.ENSP00000263025,9606.ENSP00000264613,9606.ENSP00000265983,9606.ENSP00000284981,9606.ENSP00000307549,9606.ENSP00000308541,9606.ENSP00000320866,9606.ENSP00000355627,9606.ENSP00000356790,9606.ENSP00000371497,9606.ENSP00000373370,9606.ENSP00000379140,9606.ENSP00000385834,…	CETP,APOC3,APOB,APOA1,KRT1,SLC4A1,MAPK3,CP,HPX,APP,NPTX1,F2,CALR,AGT,ATP1B1,C1QTNF3,FLG2,CXCL12,TF,PRNP,CPS1,FBN2,ATP1A3,APOC2,APOC4,CCL14,PTPN11
GO Process	GO:0051234	Establishment of localization	80	3946	0.16	0.0118	9606.ENSP00000200676,9606.ENSP00000205948,9606.ENSP00000207549,9606.ENSP00000217407,9606.ENSP00000222271,9606.ENSP00000226218,9606.ENSP00000226355,9606.ENSP00000227667,9606.ENSP00000230036,9606.ENSP00000232003,9606.ENSP00000233242,9606.ENSP00000236850,9606.ENSP00000247461,9606.ENSP00000258201,9606.ENSP00000260356,9606.ENSP00000262418,9606.ENSP00000262776,9606.ENSP00000263025,9606.ENSP00000263710,…	CETP,APOH,UNC13D,LBP,COMP,VTN,AFM,APOC3,GPLD1,HRG,APOB,APOA1,CANX,FHOD1,THBS1,SLC4A1,LGALS3BP,MAPK3,CLASP1,CP,HPX,APP,APPL1,KPNB1,FCN2,AZGP1,PKDCC,HSPA4,HOOK3,NPTX1,LTBP4,STAB1,CLU,BIN1,APOL1,CALR,EHD3,HHIPL1,SERPINA5,DNM3,DYNC1H1,SPTBN1,CACNA2D1,DCTN1,AGT,ATP1B1,LMNA,EPS15,FCN1,NIBAN2,HSPG2,ANXA1,CLSTN1,IPO7,KRT18,STAB2,SSC5D,PDCD10,SEC31A,APOF,NSF,PLA2G2A,TF,RAB1A,PCYOX1,CORO1C,PTPRC,PLTP,PIK3C…
GO Process	GO:0015918	Sterol transport	7	82	0.79	0.0124	9606.ENSP00000200676,9606.ENSP00000227667,9606.ENSP00000233242,9606.ENSP00000236850,9606.ENSP00000315130,9606.ENSP00000417138,9606.ENSP00000466775	CETP,APOC3,APOB,APOA1,CLU,PLTP,APOC2
GO Process	GO:0023056	Positive regulation of signaling	42	1698	0.25	0.0125	9606.ENSP00000012443,9606.ENSP00000212355,9606.ENSP00000217407,9606.ENSP00000222399,9606.ENSP00000226218,9606.ENSP00000230036,9606.ENSP00000236850,9606.ENSP00000241052,9606.ENSP00000245907,9606.ENSP00000256646,9606.ENSP00000258341,9606.ENSP00000260356,9606.ENSP00000261405,9606.ENSP00000263025,9606.ENSP00000264187,9606.ENSP00000265983,9606.ENSP00000268182,9606.ENSP00000284981,9606.ENSP00000301522,…	PPP5C,TGFBR3,LBP,LAMB1,VTN,GPLD1,APOA1,CAT,C3,NOTCH2,LAMC1,THBS1,VWF,MAPK3,NID1,HPX,IQGAP1,APP,PRDX2,MAP2K1,LRG1,F2,GNAI2,PAK2,CLU,CALR,AGT,F10,CLSTN1,C1QTNF3,PDCD10,GAPDH,NSF,PLA2G2A,RELN,PTPRC,PIK3CG,ITGB3,CCL14,CCL18,PTPN11,NOTCH1
GO Process	GO:0002831	Regulation of response to biotic stimulus	15	361	0.48	0.0127	9606.ENSP00000217407,9606.ENSP00000232003,9606.ENSP00000245907,9606.ENSP00000263025,9606.ENSP00000265983,9606.ENSP00000288266,9606.ENSP00000291744,9606.ENSP00000301522,9606.ENSP00000314067,9606.ENSP00000323929,9606.ENSP00000352438,9606.ENSP00000356399,9606.ENSP00000360871,9606.ENSP00000375978,9606.ENSP00000489597	LBP,HRG,C3,MAPK3,HPX,APPL1,FCN2,PRDX2,PAK2,A2M,PCBP2,CFH,FCN1,XRCC5,PTPN11
GO Process	GO:0035239	Tube morphogenesis	22	669	0.37	0.0128	9606.ENSP00000212355,9606.ENSP00000222271,9606.ENSP00000225655,9606.ENSP00000230036,9606.ENSP00000232003,9606.ENSP00000233242,9606.ENSP00000252804,9606.ENSP00000256646,9606.ENSP00000260356,9606.ENSP00000262407,9606.ENSP00000263388,9606.ENSP00000309953,9606.ENSP00000318195,9606.ENSP00000336762,9606.ENSP00000352798,9606.ENSP00000363827,9606.ENSP00000373539,9606.ENSP00000376506,9606.ENSP00000419260,…	TGFBR3,COMP,PFN1,GPLD1,HRG,APOB,PXDN,NOTCH2,THBS1,ITGA2B,NOTCH3,EFEMP2,NCL,ANG,COL18A1,HSPG2,STAB2,PDCD10,PIK3CG,ITGB3,MTHFD1,NOTCH1
GO Process	GO:0010038	Response to metal ion	15	362	0.47	0.013	9606.ENSP00000012443,9606.ENSP00000230036,9606.ENSP00000241052,9606.ENSP00000260356,9606.ENSP00000263025,9606.ENSP00000268182,9606.ENSP00000284981,9606.ENSP00000307549,9606.ENSP00000320866,9606.ENSP00000339933,9606.ENSP00000378721,9606.ENSP00000385834,9606.ENSP00000399376,9606.ENSP00000402608,9606.ENSP00000467141	PPP5C,GPLD1,CAT,THBS1,MAPK3,IQGAP1,APP,NPTX1,CALR,PKLR,SEC31A,TF,PRNP,CPS1,TTN
GO Process	GO:1902905	Positive regulation of supramolecular fiber organization	10	175	0.61	0.0134	9606.ENSP00000225655,9606.ENSP00000236850,9606.ENSP00000258201,9606.ENSP00000263710,9606.ENSP00000284981,9606.ENSP00000309953,9606.ENSP00000315130,9606.ENSP00000316779,9606.ENSP00000354791,9606.ENSP00000407685	PFN1,APOA1,FHOD1,CLASP1,APP,EFEMP2,CLU,BIN1,DCTN1,TNXB
GO Process	GO:0019725	Cellular homeostasis	21	628	0.38	0.0141	9606.ENSP00000262418,9606.ENSP00000262746,9606.ENSP00000263025,9606.ENSP00000264613,9606.ENSP00000265462,9606.ENSP00000265983,9606.ENSP00000284981,9606.ENSP00000298510,9606.ENSP00000301522,9606.ENSP00000307549,9606.ENSP00000308541,9606.ENSP00000320866,9606.ENSP00000354791,9606.ENSP00000355627,9606.ENSP00000356790,9606.ENSP00000371497,9606.ENSP00000379140,9606.ENSP00000385834,9606.ENSP00000399376,…	SLC4A1,PRDX1,MAPK3,CP,PRDX5,HPX,APP,PRDX3,PRDX2,NPTX1,F2,CALR,DCTN1,AGT,ATP1B1,C1QTNF3,CXCL12,TF,PRNP,ATP1A3,CCL14
GO Process	GO:0019538	Protein metabolic process	79	3910	0.16	0.0141	9606.ENSP00000012443,9606.ENSP00000205948,9606.ENSP00000212355,9606.ENSP00000218099,9606.ENSP00000222271,9606.ENSP00000223061,9606.ENSP00000223357,9606.ENSP00000227667,9606.ENSP00000229268,9606.ENSP00000230036,9606.ENSP00000233242,9606.ENSP00000236850,9606.ENSP00000241052,9606.ENSP00000244137,9606.ENSP00000245907,9606.ENSP00000247461,9606.ENSP00000252244,9606.ENSP00000253496,9606.ENSP00000260356,…	PPP5C,APOH,TGFBR3,F9,COMP,PCOLCE,AEBP1,APOC3,USP5,GPLD1,APOB,APOA1,CAT,PEPD,C3,CANX,KRT1,F12,THBS1,AARS1,ELOB,MAPK3,HPX,KRT10,HABP2,APP,FCN2,PKDCC,PRDX3,C2,MAP2K1,F2,PSMD1,KRT2,OXSR1,PAK2,CLU,APOL1,CALR,SPOCK2,MGAT1,UBA1,GANAB,RPL22,SPTBN1,GFPT1,CNDP1,NAE1,PCBP2,CFH,FCN1,PGK1,F10,ANXA1,RPS6KA3,DSP,PTPRD,GARS1,EFEMP1,GAPDH,CUL4B,RPS14,PSMD14,PCYOX1,PPP1R12A,RELN,GSPT1,PTPRC,CFB,PIK3CG,PGM3,HPR,C1R…
GO Process	GO:0042063	Gliogenesis	12	248	0.54	0.0142	9606.ENSP00000222399,9606.ENSP00000226218,9606.ENSP00000263025,9606.ENSP00000284981,9606.ENSP00000302486,9606.ENSP00000315130,9606.ENSP00000366109,9606.ENSP00000384109,9606.ENSP00000392423,9606.ENSP00000446007,9606.ENSP00000489597,9606.ENSP00000498587	LAMB1,VTN,MAPK3,APP,MAP2K1,CLU,ANXA1,CUL4B,RELN,VIM,PTPN11,NOTCH1
GO Process	GO:0035051	Cardiocyte differentiation	8	113	0.71	0.0143	9606.ENSP00000212355,9606.ENSP00000263025,9606.ENSP00000320866,9606.ENSP00000355627,9606.ENSP00000357283,9606.ENSP00000467141,9606.ENSP00000491215,9606.ENSP00000498587	TGFBR3,MAPK3,CALR,AGT,LMNA,TTN,HNRNPU,NOTCH1
GO Process	GO:0061024	Membrane organization	24	773	0.35	0.0147	9606.ENSP00000200676,9606.ENSP00000233242,9606.ENSP00000236850,9606.ENSP00000260356,9606.ENSP00000262418,9606.ENSP00000302961,9606.ENSP00000315130,9606.ENSP00000316779,9606.ENSP00000333203,9606.ENSP00000349259,9606.ENSP00000354791,9606.ENSP00000356790,9606.ENSP00000357283,9606.ENSP00000360882,9606.ENSP00000370593,9606.ENSP00000378721,9606.ENSP00000381293,9606.ENSP00000387286,9606.ENSP00000392423,…	CETP,APOB,APOA1,THBS1,SLC4A1,HSPA4,CLU,BIN1,SERPINA5,SPTBN1,DCTN1,ATP1B1,LMNA,COL5A1,PTPRD,SEC31A,NSF,RAB1A,RELN,CORO1C,PTPRC,PLTP,IGHD,IGHV3-72
GO Process	GO:1904026	Regulation of collagen fibril organization	3	7	1.49	0.0151	9606.ENSP00000223357,9606.ENSP00000309953,9606.ENSP00000407685	AEBP1,EFEMP2,TNXB
GO Process	GO:0032677	Regulation of interleukin-8 production	7	86	0.77	0.0155	9606.ENSP00000217407,9606.ENSP00000296435,9606.ENSP00000360871,9606.ENSP00000366109,9606.ENSP00000374274,9606.ENSP00000387286,9606.ENSP00000411355	LBP,CAMP,FCN1,ANXA1,SSC5D,RAB1A,PTPRC
GO Process	GO:0009168	Purine ribonucleoside monophosphate biosynthetic process	4	20	1.16	0.0156	9606.ENSP00000382595,9606.ENSP00000419851,9606.ENSP00000443965,9606.ENSP00000499465	PAICS,GMPS,ADK,AMPD2
GO Process	GO:0042127	Regulation of cell population proliferation	41	1669	0.25	0.0164	9606.ENSP00000205948,9606.ENSP00000212355,9606.ENSP00000222271,9606.ENSP00000222399,9606.ENSP00000230036,9606.ENSP00000232003,9606.ENSP00000256646,9606.ENSP00000258341,9606.ENSP00000260356,9606.ENSP00000263025,9606.ENSP00000263388,9606.ENSP00000265131,9606.ENSP00000271638,9606.ENSP00000284981,9606.ENSP00000292401,9606.ENSP00000296435,9606.ENSP00000298510,9606.ENSP00000302486,9606.ENSP00000302621,…	APOH,TGFBR3,COMP,LAMB1,GPLD1,HRG,NOTCH2,LAMC1,THBS1,MAPK3,NOTCH3,TNC,S100A11,APP,AZGP1,CAMP,PRDX3,MAP2K1,LRG1,F2,EFEMP2,GNAI2,CLU,CALR,ANG,COL18A1,AGT,LMNA,NIBAN2,ANXA1,KRT6A,SERPINB5,XRCC5,PDCD10,CXCL12,PRNP,PTPRC,ITGB3,CCL14,HNRNPU,NOTCH1
GO Process	GO:0060191	Regulation of lipase activity	7	88	0.76	0.0175	9606.ENSP00000205948,9606.ENSP00000227667,9606.ENSP00000236850,9606.ENSP00000336762,9606.ENSP00000355627,9606.ENSP00000366109,9606.ENSP00000466775	APOH,APOC3,APOA1,ANG,AGT,ANXA1,APOC2
GO Process	GO:0051093	Negative regulation of developmental process	27	933	0.32	0.0178	9606.ENSP00000200676,9606.ENSP00000205948,9606.ENSP00000232003,9606.ENSP00000255040,9606.ENSP00000260356,9606.ENSP00000263388,9606.ENSP00000284981,9606.ENSP00000301522,9606.ENSP00000305699,9606.ENSP00000308541,9606.ENSP00000312946,9606.ENSP00000320866,9606.ENSP00000347457,9606.ENSP00000355627,9606.ENSP00000360882,9606.ENSP00000362409,9606.ENSP00000362413,9606.ENSP00000363770,9606.ENSP00000363827,…	CETP,APOH,HRG,APCS,THBS1,NOTCH3,APP,PRDX2,HOOK3,F2,STAB1,CALR,DNM3,AGT,COL5A1,NIBAN2,PGK1,C1QC,HSPG2,ANXA1,EFEMP1,CORO1C,ITGB3,PTPRS,PTPN11,HNRNPU,NOTCH1
GO Process	GO:0051247	Positive regulation of protein metabolic process	38	1512	0.26	0.0179	9606.ENSP00000223061,9606.ENSP00000226218,9606.ENSP00000229268,9606.ENSP00000230036,9606.ENSP00000245907,9606.ENSP00000253496,9606.ENSP00000260356,9606.ENSP00000262306,9606.ENSP00000263025,9606.ENSP00000265983,9606.ENSP00000268182,9606.ENSP00000284981,9606.ENSP00000296435,9606.ENSP00000302486,9606.ENSP00000308541,9606.ENSP00000314067,9606.ENSP00000315130,9606.ENSP00000336762,9606.ENSP00000355627,…	PCOLCE,VTN,USP5,GPLD1,C3,F12,THBS1,ELOB,MAPK3,HPX,IQGAP1,APP,CAMP,MAP2K1,F2,PAK2,CLU,ANG,AGT,NIBAN1,LMNA,XRCC5,PDCD10,NSF,CUL4B,PSMD14,RAB1A,PPP1R12A,RELN,PRNP,PTPRC,PIK3CG,VIM,ITGB3,PSMC3,PTPN11,HNRNPU,ENO1
GO Process	GO:0048872	Homeostasis of number of cells	12	256	0.53	0.0181	9606.ENSP00000212355,9606.ENSP00000262418,9606.ENSP00000262746,9606.ENSP00000265462,9606.ENSP00000301522,9606.ENSP00000355518,9606.ENSP00000366109,9606.ENSP00000383364,9606.ENSP00000385958,9606.ENSP00000489597,9606.ENSP00000498336,9606.ENSP00000498587	TGFBR3,SLC4A1,PRDX1,PRDX5,PRDX2,FH,ANXA1,PLA2G2A,RPS14,PTPN11,MTHFD1,NOTCH1
GO Process	GO:0034614	Cellular response to reactive oxygen species	8	118	0.69	0.0182	9606.ENSP00000241052,9606.ENSP00000262746,9606.ENSP00000263025,9606.ENSP00000265462,9606.ENSP00000298510,9606.ENSP00000301522,9606.ENSP00000366109,9606.ENSP00000376506	CAT,PRDX1,MAPK3,PRDX5,PRDX3,PRDX2,ANXA1,PDCD10
GO Process	GO:0010634	Positive regulation of epithelial cell migration	9	150	0.63	0.0183	9606.ENSP00000225655,9606.ENSP00000230036,9606.ENSP00000260356,9606.ENSP00000263710,9606.ENSP00000320866,9606.ENSP00000355627,9606.ENSP00000366109,9606.ENSP00000419260,9606.ENSP00000452786	PFN1,GPLD1,THBS1,CLASP1,CALR,AGT,ANXA1,PIK3CG,ITGB3
GO Process	GO:0019693	Ribose phosphate metabolic process	16	419	0.44	0.0183	9606.ENSP00000253382,9606.ENSP00000322706,9606.ENSP00000339933,9606.ENSP00000356790,9606.ENSP00000362413,9606.ENSP00000370517,9606.ENSP00000380070,9606.ENSP00000382595,9606.ENSP00000391481,9606.ENSP00000419851,9606.ENSP00000443965,9606.ENSP00000445175,9606.ENSP00000474090,9606.ENSP00000495530,9606.ENSP00000498336,9606.ENSP00000499465	ACSS2,HMGCS1,PKLR,ATP1B1,PGK1,PFKP,GAPDH,PAICS,TKT,GMPS,ADK,LDHA,UPP2,ENO1,MTHFD1,AMPD2
GO Process	GO:0060284	Regulation of cell development	18	506	0.41	0.0183	9606.ENSP00000207549,9606.ENSP00000236850,9606.ENSP00000256646,9606.ENSP00000302486,9606.ENSP00000303908,9606.ENSP00000305699,9606.ENSP00000308541,9606.ENSP00000316779,9606.ENSP00000320866,9606.ENSP00000362409,9606.ENSP00000370593,9606.ENSP00000375978,9606.ENSP00000379140,9606.ENSP00000392423,9606.ENSP00000394496,9606.ENSP00000452786,9606.ENSP00000467537,9606.ENSP00000498587	UNC13D,APOA1,NOTCH2,MAP2K1,TWF2,HOOK3,F2,BIN1,CALR,NIBAN2,PTPRD,XRCC5,CXCL12,RELN,CORO1C,ITGB3,PTPRS,NOTCH1
GO Process	GO:1904646	Cellular response to amyloid-beta	5	40	0.95	0.0185	9606.ENSP00000284981,9606.ENSP00000349320,9606.ENSP00000399376,9606.ENSP00000444688,9606.ENSP00000498872	APP,CACNA2D1,PRNP,ATP1A3,SNX6
GO Process	GO:0060249	Anatomical structure homeostasis	13	296	0.5	0.0185	9606.ENSP00000222271,9606.ENSP00000252244,9606.ENSP00000258341,9606.ENSP00000262746,9606.ENSP00000265462,9606.ENSP00000284981,9606.ENSP00000292401,9606.ENSP00000354791,9606.ENSP00000355518,9606.ENSP00000385834,9606.ENSP00000450540,9606.ENSP00000489597,9606.ENSP00000498587	COMP,KRT1,LAMC1,PRDX1,PRDX5,APP,AZGP1,DCTN1,FH,TF,SERPINA3,PTPN11,NOTCH1
GO Process	GO:0055006	Cardiac cell development	6	63	0.84	0.0186	9606.ENSP00000212355,9606.ENSP00000355627,9606.ENSP00000357283,9606.ENSP00000467141,9606.ENSP00000491215,9606.ENSP00000498587	TGFBR3,AGT,LMNA,TTN,HNRNPU,NOTCH1
GO Process	GO:0002687	Positive regulation of leukocyte migration	9	151	0.63	0.0188	9606.ENSP00000217407,9606.ENSP00000252590,9606.ENSP00000260356,9606.ENSP00000263025,9606.ENSP00000284981,9606.ENSP00000311713,9606.ENSP00000320866,9606.ENSP00000379140,9606.ENSP00000452786	LBP,PLVAP,THBS1,MAPK3,APP,OXSR1,CALR,CXCL12,ITGB3
GO Process	GO:0099175	Regulation of postsynapse organization	7	90	0.75	0.019	9606.ENSP00000284981,9606.ENSP00000307549,9606.ENSP00000347457,9606.ENSP00000370593,9606.ENSP00000392423,9606.ENSP00000399376,9606.ENSP00000467537	APP,NPTX1,DNM3,PTPRD,RELN,PRNP,PTPRS
GO Process	GO:2000427	Positive regulation of apoptotic cell clearance	3	8	1.43	0.0193	9606.ENSP00000245907,9606.ENSP00000299367,9606.ENSP00000415941	C3,C2,C4B
GO Process	GO:0050730	Regulation of peptidyl-tyrosine phosphorylation	12	259	0.52	0.0193	9606.ENSP00000226218,9606.ENSP00000232003,9606.ENSP00000265983,9606.ENSP00000284981,9606.ENSP00000314067,9606.ENSP00000355627,9606.ENSP00000392423,9606.ENSP00000399376,9606.ENSP00000411355,9606.ENSP00000452786,9606.ENSP00000489597,9606.ENSP00000498872	VTN,HRG,HPX,APP,PAK2,AGT,RELN,PRNP,PTPRC,ITGB3,PTPN11,SNX6
GO Process	GO:0050808	Synapse organization	13	298	0.5	0.0193	9606.ENSP00000225655,9606.ENSP00000245907,9606.ENSP00000265131,9606.ENSP00000284981,9606.ENSP00000313967,9606.ENSP00000321108,9606.ENSP00000347457,9606.ENSP00000354791,9606.ENSP00000363770,9606.ENSP00000370593,9606.ENSP00000392423,9606.ENSP00000399376,9606.ENSP00000467537	PFN1,C3,TNC,APP,C1QB,SPOCK2,DNM3,DCTN1,C1QC,PTPRD,RELN,PRNP,PTPRS
GO Process	GO:0032374	Regulation of cholesterol transport	6	64	0.83	0.0196	9606.ENSP00000200676,9606.ENSP00000222381,9606.ENSP00000227667,9606.ENSP00000236850,9606.ENSP00000417138,9606.ENSP00000466775	CETP,PON1,APOC3,APOA1,PLTP,APOC2
GO Process	GO:0098869	Cellular oxidant detoxification	7	91	0.74	0.0199	9606.ENSP00000241052,9606.ENSP00000252804,9606.ENSP00000262746,9606.ENSP00000265462,9606.ENSP00000298510,9606.ENSP00000301522,9606.ENSP00000494175	CAT,PXDN,PRDX1,PRDX5,PRDX3,PRDX2,HBB
GO Process	GO:0009967	Positive regulation of signal transduction	38	1525	0.25	0.0199	9606.ENSP00000012443,9606.ENSP00000212355,9606.ENSP00000217407,9606.ENSP00000222399,9606.ENSP00000226218,9606.ENSP00000236850,9606.ENSP00000241052,9606.ENSP00000245907,9606.ENSP00000256646,9606.ENSP00000258341,9606.ENSP00000260356,9606.ENSP00000261405,9606.ENSP00000263025,9606.ENSP00000264187,9606.ENSP00000265983,9606.ENSP00000268182,9606.ENSP00000284981,9606.ENSP00000301522,9606.ENSP00000302486,…	PPP5C,TGFBR3,LBP,LAMB1,VTN,APOA1,CAT,C3,NOTCH2,LAMC1,THBS1,VWF,MAPK3,NID1,HPX,IQGAP1,APP,PRDX2,MAP2K1,LRG1,F2,GNAI2,PAK2,CLU,CALR,AGT,F10,PDCD10,GAPDH,PLA2G2A,RELN,PTPRC,PIK3CG,ITGB3,CCL14,CCL18,PTPN11,NOTCH1
GO Process	GO:0001934	Positive regulation of protein phosphorylation	23	747	0.35	0.0202	9606.ENSP00000226218,9606.ENSP00000245907,9606.ENSP00000260356,9606.ENSP00000263025,9606.ENSP00000265983,9606.ENSP00000268182,9606.ENSP00000284981,9606.ENSP00000296435,9606.ENSP00000302486,9606.ENSP00000308541,9606.ENSP00000314067,9606.ENSP00000315130,9606.ENSP00000336762,9606.ENSP00000355627,9606.ENSP00000356481,9606.ENSP00000375978,9606.ENSP00000376506,9606.ENSP00000392423,9606.ENSP00000399376,…	VTN,C3,THBS1,MAPK3,HPX,IQGAP1,APP,CAMP,MAP2K1,F2,PAK2,CLU,ANG,AGT,NIBAN1,XRCC5,PDCD10,RELN,PRNP,PTPRC,PIK3CG,ITGB3,PTPN11
GO Process	GO:0010647	Positive regulation of cell communication	41	1693	0.24	0.0202	9606.ENSP00000012443,9606.ENSP00000212355,9606.ENSP00000217407,9606.ENSP00000222399,9606.ENSP00000226218,9606.ENSP00000230036,9606.ENSP00000236850,9606.ENSP00000241052,9606.ENSP00000245907,9606.ENSP00000256646,9606.ENSP00000258341,9606.ENSP00000260356,9606.ENSP00000261405,9606.ENSP00000263025,9606.ENSP00000264187,9606.ENSP00000265983,9606.ENSP00000268182,9606.ENSP00000284981,9606.ENSP00000301522,…	PPP5C,TGFBR3,LBP,LAMB1,VTN,GPLD1,APOA1,CAT,C3,NOTCH2,LAMC1,THBS1,VWF,MAPK3,NID1,HPX,IQGAP1,APP,PRDX2,MAP2K1,LRG1,F2,GNAI2,PAK2,CLU,CALR,AGT,F10,CLSTN1,C1QTNF3,PDCD10,GAPDH,PLA2G2A,RELN,PTPRC,PIK3CG,ITGB3,CCL14,CCL18,PTPN11,NOTCH1
GO Process	GO:0010001	Glial cell differentiation	10	188	0.58	0.0204	9606.ENSP00000226218,9606.ENSP00000263025,9606.ENSP00000284981,9606.ENSP00000302486,9606.ENSP00000315130,9606.ENSP00000384109,9606.ENSP00000392423,9606.ENSP00000446007,9606.ENSP00000489597,9606.ENSP00000498587	VTN,MAPK3,APP,MAP2K1,CLU,CUL4B,RELN,VIM,PTPN11,NOTCH1
GO Process	GO:0002697	Regulation of immune effector process	15	383	0.45	0.0204	9606.ENSP00000207549,9606.ENSP00000217407,9606.ENSP00000236850,9606.ENSP00000245907,9606.ENSP00000265983,9606.ENSP00000288266,9606.ENSP00000291744,9606.ENSP00000299367,9606.ENSP00000323929,9606.ENSP00000356399,9606.ENSP00000360871,9606.ENSP00000366109,9606.ENSP00000411355,9606.ENSP00000415941,9606.ENSP00000416561	UNC13D,LBP,APOA1,C3,HPX,APPL1,FCN2,C2,A2M,CFH,FCN1,ANXA1,PTPRC,C4B,CFB
GO Process	GO:0043436	Oxoacid metabolic process	25	846	0.33	0.0204	9606.ENSP00000222381,9606.ENSP00000244137,9606.ENSP00000245907,9606.ENSP00000253382,9606.ENSP00000261772,9606.ENSP00000270776,9606.ENSP00000273450,9606.ENSP00000339933,9606.ENSP00000349860,9606.ENSP00000355518,9606.ENSP00000356015,9606.ENSP00000361064,9606.ENSP00000362413,9606.ENSP00000365773,9606.ENSP00000370517,9606.ENSP00000373073,9606.ENSP00000373918,9606.ENSP00000379839,9606.ENSP00000380070,…	PON1,PEPD,C3,ACSS2,AARS1,PGD,ALDH1L1,PKLR,GFPT1,FH,ACAT2,MINPP1,PGK1,PSAT1,PFKP,UROC1,GARS1,GNE,GAPDH,CPS1,TNXB,GMPS,LDHA,ENO1,MTHFD1
GO Process	GO:1902533	Positive regulation of intracellular signal transduction	28	997	0.31	0.0204	9606.ENSP00000012443,9606.ENSP00000236850,9606.ENSP00000241052,9606.ENSP00000256646,9606.ENSP00000260356,9606.ENSP00000261405,9606.ENSP00000263025,9606.ENSP00000268182,9606.ENSP00000284981,9606.ENSP00000301522,9606.ENSP00000302486,9606.ENSP00000308541,9606.ENSP00000312999,9606.ENSP00000315130,9606.ENSP00000320866,9606.ENSP00000355627,9606.ENSP00000364709,9606.ENSP00000376506,9606.ENSP00000380070,…	PPP5C,APOA1,CAT,NOTCH2,THBS1,VWF,MAPK3,IQGAP1,APP,PRDX2,MAP2K1,F2,GNAI2,CLU,CALR,AGT,F10,PDCD10,GAPDH,PLA2G2A,RELN,PTPRC,PIK3CG,ITGB3,CCL14,CCL18,PTPN11,NOTCH1
GO Process	GO:0030301	Cholesterol transport	6	65	0.82	0.0205	9606.ENSP00000200676,9606.ENSP00000227667,9606.ENSP00000233242,9606.ENSP00000236850,9606.ENSP00000315130,9606.ENSP00000466775	CETP,APOC3,APOB,APOA1,CLU,APOC2
GO Process	GO:0071495	Cellular response to endogenous stimulus	30	1103	0.29	0.0209	9606.ENSP00000212355,9606.ENSP00000222271,9606.ENSP00000230036,9606.ENSP00000233242,9606.ENSP00000256646,9606.ENSP00000263025,9606.ENSP00000268182,9606.ENSP00000284981,9606.ENSP00000288266,9606.ENSP00000296435,9606.ENSP00000311905,9606.ENSP00000314067,9606.ENSP00000318195,9606.ENSP00000320866,9606.ENSP00000339933,9606.ENSP00000340211,9606.ENSP00000349320,9606.ENSP00000355180,9606.ENSP00000355627,…	TGFBR3,COMP,GPLD1,APOB,NOTCH2,MAPK3,IQGAP1,APP,APPL1,CAMP,LTBP4,PAK2,NCL,CALR,PKLR,CORO1B,CACNA2D1,COL6A1,AGT,ANXA1,PRNP,CPS1,PIK3CG,ATP1A3,VIM,ITGB3,PTPN11,HNRNPU,NOTCH1,SNX6
GO Process	GO:0044093	Positive regulation of molecular function	39	1587	0.25	0.0209	9606.ENSP00000205948,9606.ENSP00000222381,9606.ENSP00000223061,9606.ENSP00000225655,9606.ENSP00000226218,9606.ENSP00000230036,9606.ENSP00000236850,9606.ENSP00000241052,9606.ENSP00000260356,9606.ENSP00000263025,9606.ENSP00000268182,9606.ENSP00000284981,9606.ENSP00000298510,9606.ENSP00000302486,9606.ENSP00000308541,9606.ENSP00000312999,9606.ENSP00000314067,9606.ENSP00000315130,9606.ENSP00000316779,…	APOH,PON1,PCOLCE,PFN1,VTN,GPLD1,APOA1,CAT,THBS1,MAPK3,IQGAP1,APP,PRDX3,MAP2K1,F2,GNAI2,PAK2,CLU,BIN1,EHD3,ANG,CACNA2D1,AGT,ATP1B1,NIBAN2,XRCC5,PDCD10,PSMD14,PPP1R12A,RELN,CORO1C,PRNP,PTPRC,PIK3CG,ITGB3,APOC2,CCL14,CCL18,HNRNPU
GO Process	GO:0010720	Positive regulation of cell development	13	304	0.49	0.0218	9606.ENSP00000207549,9606.ENSP00000236850,9606.ENSP00000302486,9606.ENSP00000303908,9606.ENSP00000316779,9606.ENSP00000320866,9606.ENSP00000362409,9606.ENSP00000370593,9606.ENSP00000375978,9606.ENSP00000379140,9606.ENSP00000392423,9606.ENSP00000452786,9606.ENSP00000498587	UNC13D,APOA1,MAP2K1,TWF2,BIN1,CALR,NIBAN2,PTPRD,XRCC5,CXCL12,RELN,ITGB3,NOTCH1
GO Process	GO:0050920	Regulation of chemotaxis	11	227	0.54	0.022	9606.ENSP00000217407,9606.ENSP00000223642,9606.ENSP00000232003,9606.ENSP00000260356,9606.ENSP00000263025,9606.ENSP00000284981,9606.ENSP00000311713,9606.ENSP00000320866,9606.ENSP00000340211,9606.ENSP00000379140,9606.ENSP00000498587	LBP,C5,HRG,THBS1,MAPK3,APP,OXSR1,CALR,CORO1B,CXCL12,NOTCH1
GO Process	GO:0001932	Regulation of protein phosphorylation	30	1108	0.29	0.0221	9606.ENSP00000226218,9606.ENSP00000232003,9606.ENSP00000236850,9606.ENSP00000245907,9606.ENSP00000260356,9606.ENSP00000263025,9606.ENSP00000265983,9606.ENSP00000268182,9606.ENSP00000284981,9606.ENSP00000296435,9606.ENSP00000302486,9606.ENSP00000308541,9606.ENSP00000314067,9606.ENSP00000315130,9606.ENSP00000336762,9606.ENSP00000355627,9606.ENSP00000356481,9606.ENSP00000369042,9606.ENSP00000375978,…	VTN,HRG,APOA1,C3,THBS1,MAPK3,HPX,IQGAP1,APP,CAMP,MAP2K1,F2,PAK2,CLU,ANG,AGT,NIBAN1,IPO7,XRCC5,PDCD10,RELN,CORO1C,PRNP,TNXB,PTPRC,PIK3CG,ITGB3,TTN,PTPN11,SNX6
GO Process	GO:1901701	Cellular response to oxygen-containing compound	29	1057	0.3	0.0223	9606.ENSP00000217407,9606.ENSP00000230036,9606.ENSP00000241052,9606.ENSP00000262746,9606.ENSP00000263025,9606.ENSP00000265462,9606.ENSP00000284981,9606.ENSP00000288266,9606.ENSP00000296435,9606.ENSP00000298510,9606.ENSP00000301522,9606.ENSP00000303908,9606.ENSP00000307549,9606.ENSP00000312999,9606.ENSP00000339933,9606.ENSP00000349320,9606.ENSP00000355180,9606.ENSP00000355627,9606.ENSP00000366109,…	LBP,GPLD1,CAT,PRDX1,MAPK3,PRDX5,APP,APPL1,CAMP,PRDX3,PRDX2,TWF2,NPTX1,GNAI2,PKLR,CACNA2D1,COL6A1,AGT,ANXA1,POSTN,XRCC5,PDCD10,PRNP,CPS1,PIK3CG,ATP1A3,VIM,ITGB3,SNX6
GO Process	GO:0051924	Regulation of calcium ion transport	12	266	0.51	0.0225	9606.ENSP00000308541,9606.ENSP00000312999,9606.ENSP00000316779,9606.ENSP00000327116,9606.ENSP00000349320,9606.ENSP00000355627,9606.ENSP00000356790,9606.ENSP00000367263,9606.ENSP00000379140,9606.ENSP00000399376,9606.ENSP00000419260,9606.ENSP00000452786	F2,GNAI2,BIN1,EHD3,CACNA2D1,AGT,ATP1B1,AHNAK,CXCL12,PRNP,PIK3CG,ITGB3
GO Process	GO:0034372	Very-low-density lipoprotein particle remodeling	3	9	1.38	0.0237	9606.ENSP00000200676,9606.ENSP00000236850,9606.ENSP00000466775	CETP,APOA1,APOC2
GO Process	GO:0051006	Positive regulation of lipoprotein lipase activity	3	9	1.38	0.0237	9606.ENSP00000205948,9606.ENSP00000236850,9606.ENSP00000466775	APOH,APOA1,APOC2
GO Process	GO:0010633	Negative regulation of epithelial cell migration	6	68	0.8	0.0245	9606.ENSP00000205948,9606.ENSP00000232003,9606.ENSP00000260356,9606.ENSP00000376506,9606.ENSP00000394496,9606.ENSP00000498587	APOH,HRG,THBS1,PDCD10,CORO1C,NOTCH1
GO Process	GO:0050731	Positive regulation of peptidyl-tyrosine phosphorylation	10	194	0.57	0.0245	9606.ENSP00000226218,9606.ENSP00000265983,9606.ENSP00000284981,9606.ENSP00000314067,9606.ENSP00000355627,9606.ENSP00000392423,9606.ENSP00000399376,9606.ENSP00000411355,9606.ENSP00000452786,9606.ENSP00000489597	VTN,HPX,APP,PAK2,AGT,RELN,PRNP,PTPRC,ITGB3,PTPN11
GO Process	GO:0002685	Regulation of leukocyte migration	11	231	0.53	0.0245	9606.ENSP00000217407,9606.ENSP00000223642,9606.ENSP00000252590,9606.ENSP00000260356,9606.ENSP00000263025,9606.ENSP00000284981,9606.ENSP00000311713,9606.ENSP00000320866,9606.ENSP00000366109,9606.ENSP00000379140,9606.ENSP00000452786	LBP,C5,PLVAP,THBS1,MAPK3,APP,OXSR1,CALR,ANXA1,CXCL12,ITGB3
GO Process	GO:0042692	Muscle cell differentiation	12	269	0.51	0.0245	9606.ENSP00000222271,9606.ENSP00000279022,9606.ENSP00000309953,9606.ENSP00000316779,9606.ENSP00000320866,9606.ENSP00000327145,9606.ENSP00000355124,9606.ENSP00000355627,9606.ENSP00000357283,9606.ENSP00000467141,9606.ENSP00000491215,9606.ENSP00000498587	COMP,MYL9,EFEMP2,BIN1,CALR,FLNC,KRT19,AGT,LMNA,TTN,HNRNPU,NOTCH1
GO Process	GO:0051179	Localization	87	4512	0.14	0.0245	9606.ENSP00000200676,9606.ENSP00000205948,9606.ENSP00000207549,9606.ENSP00000217407,9606.ENSP00000222271,9606.ENSP00000226218,9606.ENSP00000226355,9606.ENSP00000227667,9606.ENSP00000230036,9606.ENSP00000232003,9606.ENSP00000233242,9606.ENSP00000236850,9606.ENSP00000247461,9606.ENSP00000258201,9606.ENSP00000260356,9606.ENSP00000262418,9606.ENSP00000262776,9606.ENSP00000263025,9606.ENSP00000263710,…	CETP,APOH,UNC13D,LBP,COMP,VTN,AFM,APOC3,GPLD1,HRG,APOB,APOA1,CANX,FHOD1,THBS1,SLC4A1,LGALS3BP,MAPK3,CLASP1,CP,HPX,APP,APPL1,KPNB1,FCN2,AZGP1,PKDCC,HSPA4,TWF2,HOOK3,NPTX1,LTBP4,STAB1,PAK2,CLU,BIN1,APOL1,CALR,EHD3,HHIPL1,SERPINA5,CORO1B,DNM3,DYNC1H1,SPTBN1,CACNA2D1,DCTN1,AGT,ATP1B1,LMNA,EPS15,FCN1,NIBAN2,HSPG2,ANXA1,CLSTN1,IPO7,DSP,KRT18,STAB2,SSC5D,XRCC5,PDCD10,SEC31A,APOF,NSF,PLA2G2A,TF,RAB1A,PCY…
GO Process	GO:0034381	Plasma lipoprotein particle clearance	4	24	1.08	0.0246	9606.ENSP00000227667,9606.ENSP00000233242,9606.ENSP00000236850,9606.ENSP00000466775	APOC3,APOB,APOA1,APOC2
GO Process	GO:0035987	Endodermal cell differentiation	5	44	0.91	0.0246	9606.ENSP00000222399,9606.ENSP00000226218,9606.ENSP00000302486,9606.ENSP00000325146,9606.ENSP00000355180	LAMB1,VTN,MAP2K1,COL12A1,COL6A1
GO Process	GO:0043277	Apoptotic cell clearance	5	44	0.91	0.0246	9606.ENSP00000260356,9606.ENSP00000291744,9606.ENSP00000360871,9606.ENSP00000366109,9606.ENSP00000452786	THBS1,FCN2,FCN1,ANXA1,ITGB3
GO Process	GO:0043410	Positive regulation of MAPK cascade	17	481	0.4	0.0247	9606.ENSP00000256646,9606.ENSP00000260356,9606.ENSP00000263025,9606.ENSP00000268182,9606.ENSP00000284981,9606.ENSP00000301522,9606.ENSP00000302486,9606.ENSP00000312999,9606.ENSP00000376506,9606.ENSP00000383364,9606.ENSP00000411355,9606.ENSP00000419260,9606.ENSP00000452786,9606.ENSP00000479097,9606.ENSP00000479955,9606.ENSP00000489597,9606.ENSP00000498587	NOTCH2,THBS1,MAPK3,IQGAP1,APP,PRDX2,MAP2K1,GNAI2,PDCD10,PLA2G2A,PTPRC,PIK3CG,ITGB3,CCL14,CCL18,PTPN11,NOTCH1
GO Process	GO:0002688	Regulation of leukocyte chemotaxis	8	128	0.65	0.0262	9606.ENSP00000217407,9606.ENSP00000223642,9606.ENSP00000260356,9606.ENSP00000263025,9606.ENSP00000284981,9606.ENSP00000311713,9606.ENSP00000320866,9606.ENSP00000379140	LBP,C5,THBS1,MAPK3,APP,OXSR1,CALR,CXCL12
GO Process	GO:0035265	Organ growth	7	98	0.71	0.0272	9606.ENSP00000212355,9606.ENSP00000222271,9606.ENSP00000355627,9606.ENSP00000357362,9606.ENSP00000362870,9606.ENSP00000489597,9606.ENSP00000498587	TGFBR3,COMP,AGT,THBS3,MATN1,PTPN11,NOTCH1
GO Process	GO:0019752	Carboxylic acid metabolic process	24	819	0.32	0.0273	9606.ENSP00000222381,9606.ENSP00000244137,9606.ENSP00000245907,9606.ENSP00000253382,9606.ENSP00000261772,9606.ENSP00000270776,9606.ENSP00000273450,9606.ENSP00000339933,9606.ENSP00000349860,9606.ENSP00000355518,9606.ENSP00000356015,9606.ENSP00000362413,9606.ENSP00000365773,9606.ENSP00000370517,9606.ENSP00000373073,9606.ENSP00000373918,9606.ENSP00000379839,9606.ENSP00000380070,9606.ENSP00000402608,…	PON1,PEPD,C3,ACSS2,AARS1,PGD,ALDH1L1,PKLR,GFPT1,FH,ACAT2,PGK1,PSAT1,PFKP,UROC1,GARS1,GNE,GAPDH,CPS1,TNXB,GMPS,LDHA,ENO1,MTHFD1
GO Process	GO:0060255	Regulation of macromolecule metabolic process	113	6249	0.11	0.0273	9606.ENSP00000215727,9606.ENSP00000217407,9606.ENSP00000222271,9606.ENSP00000223061,9606.ENSP00000223357,9606.ENSP00000223642,9606.ENSP00000225655,9606.ENSP00000226218,9606.ENSP00000229268,9606.ENSP00000230036,9606.ENSP00000232003,9606.ENSP00000233242,9606.ENSP00000236850,9606.ENSP00000241052,9606.ENSP00000245907,9606.ENSP00000246635,9606.ENSP00000253496,9606.ENSP00000255040,9606.ENSP00000256646,…	SERPIND1,LBP,COMP,PCOLCE,AEBP1,C5,PFN1,VTN,USP5,GPLD1,HRG,APOB,APOA1,CAT,C3,KRT13,F12,APCS,NOTCH2,FHOD1,ORM1,THBS1,AARS1,ELOB,MAPK3,NOTCH3,TNC,PRDX5,HPX,LUM,IQGAP1,S100A11,ITIH1,APP,APPL1,COL6A3,CAMP,PRDX3,PRDX2,MAP2K1,F2,PSMD1,GNAI2,PAK2,CLU,BIN1,NCL,CALR,SPOCK2,A2M,SERPINA5,ANG,SERPINA6,RPL22,SPTBN1,GFPT1,ITIH2,PCBP2,FH,AGT,NIBAN1,ATP1B1,LMNA,FUBP1,SERBP1,FCN1,NIBAN2,HSPG2,ATF6B,ANXA1,AHNAK,RPS…
GO Process	GO:0090257	Regulation of muscle system process	11	236	0.53	0.0281	9606.ENSP00000279022,9606.ENSP00000316779,9606.ENSP00000327116,9606.ENSP00000349320,9606.ENSP00000355627,9606.ENSP00000356790,9606.ENSP00000357283,9606.ENSP00000369129,9606.ENSP00000419260,9606.ENSP00000495530,9606.ENSP00000498587	MYL9,BIN1,EHD3,CACNA2D1,AGT,ATP1B1,LMNA,DSP,PIK3CG,ENO1,NOTCH1
GO Process	GO:0046486	Glycerolipid metabolic process	14	357	0.45	0.0283	9606.ENSP00000200676,9606.ENSP00000205948,9606.ENSP00000222381,9606.ENSP00000227667,9606.ENSP00000230036,9606.ENSP00000233242,9606.ENSP00000236850,9606.ENSP00000241052,9606.ENSP00000336762,9606.ENSP00000383364,9606.ENSP00000402608,9606.ENSP00000407685,9606.ENSP00000419260,9606.ENSP00000489597	CETP,APOH,PON1,APOC3,GPLD1,APOB,APOA1,CAT,ANG,PLA2G2A,CPS1,TNXB,PIK3CG,PTPN11
GO Process	GO:0002690	Positive regulation of leukocyte chemotaxis	7	99	0.71	0.0284	9606.ENSP00000217407,9606.ENSP00000260356,9606.ENSP00000263025,9606.ENSP00000284981,9606.ENSP00000311713,9606.ENSP00000320866,9606.ENSP00000379140	LBP,THBS1,MAPK3,APP,OXSR1,CALR,CXCL12
GO Process	GO:0010769	Regulation of cell morphogenesis involved in differentiation	7	99	0.71	0.0284	9606.ENSP00000207549,9606.ENSP00000236850,9606.ENSP00000320866,9606.ENSP00000370593,9606.ENSP00000392423,9606.ENSP00000394496,9606.ENSP00000452786	UNC13D,APOA1,CALR,PTPRD,RELN,CORO1C,ITGB3
GO Process	GO:0045807	Positive regulation of endocytosis	7	99	0.71	0.0284	9606.ENSP00000226218,9606.ENSP00000245907,9606.ENSP00000284981,9606.ENSP00000288266,9606.ENSP00000315130,9606.ENSP00000316779,9606.ENSP00000385834	VTN,C3,APP,APPL1,CLU,BIN1,TF
GO Process	GO:0001867	Complement activation, lectin pathway	3	10	1.33	0.0285	9606.ENSP00000252244,9606.ENSP00000291744,9606.ENSP00000360871	KRT1,FCN2,FCN1
GO Process	GO:0033622	Integrin activation	3	10	1.33	0.0285	9606.ENSP00000279227,9606.ENSP00000316029,9606.ENSP00000379140	FERMT3,TLN1,CXCL12
GO Process	GO:0002920	Regulation of humoral immune response	5	46	0.89	0.0285	9606.ENSP00000245907,9606.ENSP00000265983,9606.ENSP00000323929,9606.ENSP00000356399,9606.ENSP00000411355	C3,HPX,A2M,CFH,PTPRC
GO Process	GO:1902904	Negative regulation of supramolecular fiber organization	9	164	0.6	0.0285	9606.ENSP00000225655,9606.ENSP00000263710,9606.ENSP00000303908,9606.ENSP00000314067,9606.ENSP00000315130,9606.ENSP00000340211,9606.ENSP00000349259,9606.ENSP00000363827,9606.ENSP00000487444	PFN1,CLASP1,TWF2,PAK2,CLU,CORO1B,SPTBN1,HSPG2,SPTAN1
GO Process	GO:0001894	Tissue homeostasis	11	238	0.52	0.029	9606.ENSP00000222271,9606.ENSP00000252244,9606.ENSP00000258341,9606.ENSP00000262746,9606.ENSP00000265462,9606.ENSP00000292401,9606.ENSP00000355518,9606.ENSP00000385834,9606.ENSP00000450540,9606.ENSP00000489597,9606.ENSP00000498587	COMP,KRT1,LAMC1,PRDX1,PRDX5,AZGP1,FH,TF,SERPINA3,PTPN11,NOTCH1
GO Process	GO:0045088	Regulation of innate immune response	11	238	0.52	0.029	9606.ENSP00000217407,9606.ENSP00000245907,9606.ENSP00000265983,9606.ENSP00000288266,9606.ENSP00000291744,9606.ENSP00000314067,9606.ENSP00000323929,9606.ENSP00000356399,9606.ENSP00000360871,9606.ENSP00000375978,9606.ENSP00000489597	LBP,C3,HPX,APPL1,FCN2,PAK2,A2M,CFH,FCN1,XRCC5,PTPN11
GO Process	GO:0042327	Positive regulation of phosphorylation	24	826	0.32	0.0293	9606.ENSP00000226218,9606.ENSP00000245907,9606.ENSP00000260356,9606.ENSP00000263025,9606.ENSP00000265983,9606.ENSP00000268182,9606.ENSP00000284981,9606.ENSP00000296435,9606.ENSP00000302486,9606.ENSP00000308541,9606.ENSP00000314067,9606.ENSP00000315130,9606.ENSP00000336762,9606.ENSP00000355627,9606.ENSP00000356481,9606.ENSP00000375978,9606.ENSP00000376506,9606.ENSP00000385834,9606.ENSP00000392423,…	VTN,C3,THBS1,MAPK3,HPX,IQGAP1,APP,CAMP,MAP2K1,F2,PAK2,CLU,ANG,AGT,NIBAN1,XRCC5,PDCD10,TF,RELN,PRNP,PTPRC,PIK3CG,ITGB3,PTPN11
GO Process	GO:0006163	Purine nucleotide metabolic process	15	403	0.43	0.0295	9606.ENSP00000252804,9606.ENSP00000253382,9606.ENSP00000322706,9606.ENSP00000339933,9606.ENSP00000356790,9606.ENSP00000362413,9606.ENSP00000370517,9606.ENSP00000380070,9606.ENSP00000382595,9606.ENSP00000419851,9606.ENSP00000443965,9606.ENSP00000445175,9606.ENSP00000495530,9606.ENSP00000498336,9606.ENSP00000499465	PXDN,ACSS2,HMGCS1,PKLR,ATP1B1,PGK1,PFKP,GAPDH,PAICS,GMPS,ADK,LDHA,ENO1,MTHFD1,AMPD2
GO Process	GO:0033993	Response to lipid	24	827	0.32	0.0296	9606.ENSP00000012443,9606.ENSP00000217407,9606.ENSP00000222381,9606.ENSP00000230036,9606.ENSP00000233242,9606.ENSP00000241052,9606.ENSP00000257192,9606.ENSP00000260356,9606.ENSP00000263025,9606.ENSP00000296435,9606.ENSP00000298510,9606.ENSP00000301522,9606.ENSP00000303908,9606.ENSP00000320866,9606.ENSP00000323929,9606.ENSP00000355627,9606.ENSP00000366109,9606.ENSP00000368884,9606.ENSP00000375978,…	PPP5C,LBP,PON1,GPLD1,APOB,CAT,DSG1,THBS1,MAPK3,CAMP,PRDX3,PRDX2,TWF2,CALR,A2M,AGT,ANXA1,RPS6KA3,XRCC5,CPS1,ATP1A3,VIM,HNRNPU,NOTCH1
GO Process	GO:0006910	Phagocytosis, recognition	4	26	1.04	0.0299	9606.ENSP00000291744,9606.ENSP00000360871,9606.ENSP00000478893,9606.ENSP00000480035	FCN2,FCN1,IGHD,IGHV3-72
GO Process	GO:0065005	Protein-lipid complex assembly	4	26	1.04	0.0299	9606.ENSP00000227667,9606.ENSP00000233242,9606.ENSP00000236850,9606.ENSP00000316779	APOC3,APOB,APOA1,BIN1
GO Process	GO:0009117	Nucleotide metabolic process	17	493	0.39	0.0299	9606.ENSP00000252804,9606.ENSP00000253382,9606.ENSP00000322706,9606.ENSP00000339933,9606.ENSP00000356790,9606.ENSP00000362413,9606.ENSP00000370517,9606.ENSP00000373918,9606.ENSP00000380070,9606.ENSP00000382595,9606.ENSP00000419851,9606.ENSP00000443965,9606.ENSP00000445175,9606.ENSP00000474090,9606.ENSP00000495530,9606.ENSP00000498336,9606.ENSP00000499465	PXDN,ACSS2,HMGCS1,PKLR,ATP1B1,PGK1,PFKP,GARS1,GAPDH,PAICS,GMPS,ADK,LDHA,UPP2,ENO1,MTHFD1,AMPD2
GO Process	GO:0043549	Regulation of kinase activity	23	778	0.33	0.0299	9606.ENSP00000260356,9606.ENSP00000268182,9606.ENSP00000284981,9606.ENSP00000298510,9606.ENSP00000302486,9606.ENSP00000308541,9606.ENSP00000314067,9606.ENSP00000315130,9606.ENSP00000336762,9606.ENSP00000355627,9606.ENSP00000369042,9606.ENSP00000375978,9606.ENSP00000376506,9606.ENSP00000392423,9606.ENSP00000394496,9606.ENSP00000399376,9606.ENSP00000407685,9606.ENSP00000411355,9606.ENSP00000419260,…	THBS1,IQGAP1,APP,PRDX3,MAP2K1,F2,PAK2,CLU,ANG,AGT,IPO7,XRCC5,PDCD10,RELN,CORO1C,PRNP,TNXB,PTPRC,PIK3CG,ITGB3,TTN,HNRNPU,SNX6
GO Process	GO:0032760	Positive regulation of tumor necrosis factor production	7	101	0.7	0.03	9606.ENSP00000217407,9606.ENSP00000259396,9606.ENSP00000260356,9606.ENSP00000284981,9606.ENSP00000315130,9606.ENSP00000411355,9606.ENSP00000489597	LBP,ORM1,THBS1,APP,CLU,PTPRC,PTPN11
GO Process	GO:0010959	Regulation of metal ion transport	15	405	0.43	0.0303	9606.ENSP00000286713,9606.ENSP00000308541,9606.ENSP00000311713,9606.ENSP00000312999,9606.ENSP00000316779,9606.ENSP00000327116,9606.ENSP00000349320,9606.ENSP00000355627,9606.ENSP00000356790,9606.ENSP00000367263,9606.ENSP00000379140,9606.ENSP00000385834,9606.ENSP00000399376,9606.ENSP00000419260,9606.ENSP00000452786	STOM,F2,OXSR1,GNAI2,BIN1,EHD3,CACNA2D1,AGT,ATP1B1,AHNAK,CXCL12,TF,PRNP,PIK3CG,ITGB3
GO Process	GO:0006508	Proteolysis	32	1247	0.27	0.0306	9606.ENSP00000205948,9606.ENSP00000218099,9606.ENSP00000222271,9606.ENSP00000223061,9606.ENSP00000223357,9606.ENSP00000229268,9606.ENSP00000244137,9606.ENSP00000245907,9606.ENSP00000247461,9606.ENSP00000253496,9606.ENSP00000277903,9606.ENSP00000291744,9606.ENSP00000299367,9606.ENSP00000308541,9606.ENSP00000309474,9606.ENSP00000320866,9606.ENSP00000338413,9606.ENSP00000351682,9606.ENSP00000352438,…	APOH,F9,COMP,PCOLCE,AEBP1,USP5,PEPD,C3,CANX,F12,HABP2,FCN2,C2,F2,PSMD1,CALR,UBA1,CNDP1,PCBP2,CFH,FCN1,PGK1,F10,CUL4B,PSMD14,PCYOX1,RELN,CFB,HPR,C1R,OTUB1,PSMC3
GO Process	GO:0000302	Response to reactive oxygen species	9	169	0.58	0.0331	9606.ENSP00000241052,9606.ENSP00000262746,9606.ENSP00000263025,9606.ENSP00000265462,9606.ENSP00000298510,9606.ENSP00000301522,9606.ENSP00000366109,9606.ENSP00000376506,9606.ENSP00000494175	CAT,PRDX1,MAPK3,PRDX5,PRDX3,PRDX2,ANXA1,PDCD10,HBB
GO Process	GO:0033344	Cholesterol efflux	4	27	1.03	0.0332	9606.ENSP00000227667,9606.ENSP00000233242,9606.ENSP00000236850,9606.ENSP00000466775	APOC3,APOB,APOA1,APOC2
GO Process	GO:0007166	Cell surface receptor signaling pathway	46	2040	0.21	0.0332	9606.ENSP00000212355,9606.ENSP00000217407,9606.ENSP00000222271,9606.ENSP00000223642,9606.ENSP00000230036,9606.ENSP00000236850,9606.ENSP00000245907,9606.ENSP00000252590,9606.ENSP00000256646,9606.ENSP00000262407,9606.ENSP00000263025,9606.ENSP00000263388,9606.ENSP00000265983,9606.ENSP00000268182,9606.ENSP00000279227,9606.ENSP00000284981,9606.ENSP00000288266,9606.ENSP00000291744,9606.ENSP00000301522,…	TGFBR3,LBP,COMP,C5,GPLD1,APOA1,C3,PLVAP,NOTCH2,ITGA2B,MAPK3,NOTCH3,HPX,IQGAP1,FERMT3,APP,APPL1,FCN2,PRDX2,F2,OXSR1,LTBP4,GNAI2,PAK2,TLN1,SPTBN1,KRT19,AGT,FCN1,SVEP1,ANXA1,PTPRD,KRT18,EFEMP1,CXCL12,TF,RELN,PTPRC,VIM,ITGB3,IGHD,CCL14,CCL18,IGHV3-72,PTPN11,NOTCH1
GO Process	GO:0046349	Amino sugar biosynthetic process	3	11	1.29	0.0337	9606.ENSP00000349860,9606.ENSP00000379839,9606.ENSP00000425809	GFPT1,GNE,PGM3
GO Process	GO:0097084	Vascular associated smooth muscle cell development	3	11	1.29	0.0337	9606.ENSP00000222271,9606.ENSP00000309953,9606.ENSP00000498587	COMP,EFEMP2,NOTCH1
GO Process	GO:0098883	Synapse pruning	3	11	1.29	0.0337	9606.ENSP00000245907,9606.ENSP00000313967,9606.ENSP00000363770	C3,C1QB,C1QC
GO Process	GO:0009259	Ribonucleotide metabolic process	15	410	0.42	0.0337	9606.ENSP00000253382,9606.ENSP00000322706,9606.ENSP00000339933,9606.ENSP00000356790,9606.ENSP00000362413,9606.ENSP00000370517,9606.ENSP00000380070,9606.ENSP00000382595,9606.ENSP00000419851,9606.ENSP00000443965,9606.ENSP00000445175,9606.ENSP00000474090,9606.ENSP00000495530,9606.ENSP00000498336,9606.ENSP00000499465	ACSS2,HMGCS1,PKLR,ATP1B1,PGK1,PFKP,GAPDH,PAICS,GMPS,ADK,LDHA,UPP2,ENO1,MTHFD1,AMPD2
GO Process	GO:0010608	Post-transcriptional regulation of gene expression	18	546	0.37	0.0337	9606.ENSP00000246635,9606.ENSP00000260356,9606.ENSP00000261772,9606.ENSP00000262306,9606.ENSP00000284981,9606.ENSP00000318195,9606.ENSP00000320866,9606.ENSP00000336762,9606.ENSP00000346088,9606.ENSP00000356481,9606.ENSP00000360034,9606.ENSP00000368884,9606.ENSP00000379838,9606.ENSP00000380070,9606.ENSP00000385958,9606.ENSP00000398131,9606.ENSP00000446007,9606.ENSP00000491215	KRT13,THBS1,AARS1,ELOB,APP,NCL,CALR,ANG,RPL22,NIBAN1,SERBP1,RPS6KA3,CARHSP1,GAPDH,RPS14,GSPT1,VIM,HNRNPU
GO Process	GO:0033628	Regulation of cell adhesion mediated by integrin	5	49	0.87	0.0341	9606.ENSP00000232003,9606.ENSP00000279227,9606.ENSP00000419260,9606.ENSP00000452786,9606.ENSP00000489597	HRG,FERMT3,PIK3CG,ITGB3,PTPN11
GO Process	GO:0007160	Cell-matrix adhesion	8	136	0.63	0.0341	9606.ENSP00000226218,9606.ENSP00000262407,9606.ENSP00000264187,9606.ENSP00000279227,9606.ENSP00000308893,9606.ENSP00000357362,9606.ENSP00000407685,9606.ENSP00000452786	VTN,ITGA2B,NID1,FERMT3,SNED1,THBS3,TNXB,ITGB3
GO Process	GO:0006979	Response to oxidative stress	14	368	0.44	0.0341	9606.ENSP00000241052,9606.ENSP00000252244,9606.ENSP00000252804,9606.ENSP00000262746,9606.ENSP00000263025,9606.ENSP00000265462,9606.ENSP00000284981,9606.ENSP00000298510,9606.ENSP00000301522,9606.ENSP00000311713,9606.ENSP00000366109,9606.ENSP00000376506,9606.ENSP00000399376,9606.ENSP00000494175	CAT,KRT1,PXDN,PRDX1,MAPK3,PRDX5,APP,PRDX3,PRDX2,OXSR1,ANXA1,PDCD10,PRNP,HBB
GO Process	GO:0006417	Regulation of translation	16	456	0.4	0.0341	9606.ENSP00000246635,9606.ENSP00000260356,9606.ENSP00000261772,9606.ENSP00000262306,9606.ENSP00000284981,9606.ENSP00000318195,9606.ENSP00000320866,9606.ENSP00000336762,9606.ENSP00000346088,9606.ENSP00000356481,9606.ENSP00000368884,9606.ENSP00000380070,9606.ENSP00000385958,9606.ENSP00000398131,9606.ENSP00000446007,9606.ENSP00000491215	KRT13,THBS1,AARS1,ELOB,APP,NCL,CALR,ANG,RPL22,NIBAN1,RPS6KA3,GAPDH,RPS14,GSPT1,VIM,HNRNPU
GO Process	GO:0008284	Positive regulation of cell population proliferation	26	945	0.3	0.0357	9606.ENSP00000212355,9606.ENSP00000222271,9606.ENSP00000222399,9606.ENSP00000256646,9606.ENSP00000258341,9606.ENSP00000260356,9606.ENSP00000263025,9606.ENSP00000263388,9606.ENSP00000265131,9606.ENSP00000296435,9606.ENSP00000298510,9606.ENSP00000302621,9606.ENSP00000308541,9606.ENSP00000312999,9606.ENSP00000320866,9606.ENSP00000336762,9606.ENSP00000355627,9606.ENSP00000366109,9606.ENSP00000369317,…	TGFBR3,COMP,LAMB1,NOTCH2,LAMC1,THBS1,MAPK3,NOTCH3,TNC,CAMP,PRDX3,LRG1,F2,GNAI2,CALR,ANG,AGT,ANXA1,KRT6A,PDCD10,CXCL12,PTPRC,ITGB3,CCL14,HNRNPU,NOTCH1
GO Process	GO:0031647	Regulation of protein stability	13	328	0.45	0.0358	9606.ENSP00000225655,9606.ENSP00000226355,9606.ENSP00000236850,9606.ENSP00000257192,9606.ENSP00000315130,9606.ENSP00000319464,9606.ENSP00000320866,9606.ENSP00000356790,9606.ENSP00000357283,9606.ENSP00000376506,9606.ENSP00000380070,9606.ENSP00000385834,9606.ENSP00000399376	PFN1,AFM,APOA1,DSG1,CLU,CPN2,CALR,ATP1B1,LMNA,PDCD10,GAPDH,TF,PRNP
GO Process	GO:0045745	Positive regulation of G protein-coupled receptor signaling pathway	4	28	1.01	0.036	9606.ENSP00000245907,9606.ENSP00000284981,9606.ENSP00000308541,9606.ENSP00000452786	C3,APP,F2,ITGB3
GO Process	GO:0030100	Regulation of endocytosis	10	209	0.54	0.0361	9606.ENSP00000226218,9606.ENSP00000227667,9606.ENSP00000245907,9606.ENSP00000284981,9606.ENSP00000288266,9606.ENSP00000315130,9606.ENSP00000316779,9606.ENSP00000385834,9606.ENSP00000452786,9606.ENSP00000466775	VTN,APOC3,C3,APP,APPL1,CLU,BIN1,TF,ITGB3,APOC2
GO Process	GO:0050727	Regulation of inflammatory response	14	371	0.43	0.0361	9606.ENSP00000217407,9606.ENSP00000236850,9606.ENSP00000245907,9606.ENSP00000252244,9606.ENSP00000253496,9606.ENSP00000255040,9606.ENSP00000265131,9606.ENSP00000284981,9606.ENSP00000355627,9606.ENSP00000366109,9606.ENSP00000371497,9606.ENSP00000383364,9606.ENSP00000411355,9606.ENSP00000419260	LBP,APOA1,C3,KRT1,F12,APCS,TNC,APP,AGT,ANXA1,C1QTNF3,PLA2G2A,PTPRC,PIK3CG
GO Process	GO:0010941	Regulation of cell death	39	1651	0.23	0.0361	9606.ENSP00000205948,9606.ENSP00000222271,9606.ENSP00000230036,9606.ENSP00000232003,9606.ENSP00000241052,9606.ENSP00000245907,9606.ENSP00000256646,9606.ENSP00000260356,9606.ENSP00000261772,9606.ENSP00000265462,9606.ENSP00000284981,9606.ENSP00000298510,9606.ENSP00000301522,9606.ENSP00000312999,9606.ENSP00000314067,9606.ENSP00000315130,9606.ENSP00000316779,9606.ENSP00000320866,9606.ENSP00000351990,…	APOH,COMP,GPLD1,HRG,CAT,C3,NOTCH2,THBS1,AARS1,PRDX5,APP,PRDX3,PRDX2,GNAI2,PAK2,CLU,BIN1,CALR,NAE1,AGT,LMNA,ADAMTSL4,NIBAN2,HSPG2,ANXA1,RPS6KA3,KRT18,PDCD10,CXCL12,PRNP,PTPRC,PIK3CG,HPR,ITGB3,KNG1,HBB,ENO1,NOTCH1,SNX6
GO Process	GO:0006909	Phagocytosis	9	173	0.57	0.0367	9606.ENSP00000207549,9606.ENSP00000260356,9606.ENSP00000291744,9606.ENSP00000360871,9606.ENSP00000366109,9606.ENSP00000394496,9606.ENSP00000452786,9606.ENSP00000478893,9606.ENSP00000480035	UNC13D,THBS1,FCN2,FCN1,ANXA1,CORO1C,ITGB3,IGHD,IGHV3-72
GO Process	GO:0045860	Positive regulation of protein kinase activity	15	416	0.41	0.0369	9606.ENSP00000260356,9606.ENSP00000268182,9606.ENSP00000284981,9606.ENSP00000302486,9606.ENSP00000314067,9606.ENSP00000315130,9606.ENSP00000336762,9606.ENSP00000355627,9606.ENSP00000375978,9606.ENSP00000376506,9606.ENSP00000392423,9606.ENSP00000399376,9606.ENSP00000411355,9606.ENSP00000419260,9606.ENSP00000452786	THBS1,IQGAP1,APP,MAP2K1,PAK2,CLU,ANG,AGT,XRCC5,PDCD10,RELN,PRNP,PTPRC,PIK3CG,ITGB3
GO Process	GO:0007162	Negative regulation of cell adhesion	12	289	0.47	0.0374	9606.ENSP00000232003,9606.ENSP00000236850,9606.ENSP00000260356,9606.ENSP00000301522,9606.ENSP00000366109,9606.ENSP00000379140,9606.ENSP00000394496,9606.ENSP00000399376,9606.ENSP00000411355,9606.ENSP00000489597,9606.ENSP00000493985,9606.ENSP00000498587	HRG,APOA1,THBS1,PRDX2,ANXA1,CXCL12,CORO1C,PRNP,PTPRC,PTPN11,KNG1,NOTCH1
GO Process	GO:0000904	Cell morphogenesis involved in differentiation	18	554	0.37	0.0376	9606.ENSP00000222399,9606.ENSP00000256646,9606.ENSP00000258341,9606.ENSP00000263388,9606.ENSP00000268603,9606.ENSP00000279227,9606.ENSP00000284981,9606.ENSP00000307549,9606.ENSP00000352798,9606.ENSP00000362409,9606.ENSP00000362870,9606.ENSP00000379140,9606.ENSP00000387286,9606.ENSP00000392423,9606.ENSP00000420213,9606.ENSP00000452786,9606.ENSP00000489597,9606.ENSP00000498587	LAMB1,NOTCH2,LAMC1,NOTCH3,CDH11,FERMT3,APP,NPTX1,COL18A1,NIBAN2,MATN1,CXCL12,RAB1A,RELN,FLNB,ITGB3,PTPN11,NOTCH1
GO Process	GO:0010595	Positive regulation of endothelial cell migration	7	107	0.67	0.0383	9606.ENSP00000230036,9606.ENSP00000260356,9606.ENSP00000320866,9606.ENSP00000355627,9606.ENSP00000366109,9606.ENSP00000419260,9606.ENSP00000452786	GPLD1,THBS1,CALR,AGT,ANXA1,PIK3CG,ITGB3
GO Process	GO:0002011	Morphogenesis of an epithelial sheet	5	51	0.85	0.0386	9606.ENSP00000256646,9606.ENSP00000302621,9606.ENSP00000360882,9606.ENSP00000376506,9606.ENSP00000498587	NOTCH2,LRG1,COL5A1,PDCD10,NOTCH1
GO Process	GO:0033036	Macromolecule localization	51	2356	0.19	0.0386	9606.ENSP00000200676,9606.ENSP00000205948,9606.ENSP00000217407,9606.ENSP00000222271,9606.ENSP00000226355,9606.ENSP00000227667,9606.ENSP00000233242,9606.ENSP00000236850,9606.ENSP00000247461,9606.ENSP00000262418,9606.ENSP00000288266,9606.ENSP00000290158,9606.ENSP00000292401,9606.ENSP00000294964,9606.ENSP00000302961,9606.ENSP00000303908,9606.ENSP00000305699,9606.ENSP00000307549,9606.ENSP00000314067,…	CETP,APOH,LBP,COMP,AFM,APOC3,APOB,APOA1,CANX,SLC4A1,APPL1,KPNB1,AZGP1,PKDCC,HSPA4,TWF2,HOOK3,NPTX1,PAK2,CLU,APOL1,CALR,EHD3,SERPINA5,CORO1B,SPTBN1,AGT,ATP1B1,LMNA,EPS15,FCN1,ANXA1,CLSTN1,IPO7,DSP,KRT18,XRCC5,SEC31A,APOF,NSF,PLA2G2A,RAB1A,RELN,CORO1C,PLTP,FBN2,APOC2,APOC4,HNRNPU,NOTCH1,SNX6
GO Process	GO:0019732	Antifungal humoral response	3	12	1.25	0.039	9606.ENSP00000284981,9606.ENSP00000296435,9606.ENSP00000336762	APP,CAMP,ANG
GO Process	GO:0032490	Detection of molecule of bacterial origin	3	12	1.25	0.039	9606.ENSP00000217407,9606.ENSP00000374274,9606.ENSP00000415941	LBP,SSC5D,C4B
GO Process	GO:0033700	Phospholipid efflux	3	12	1.25	0.039	9606.ENSP00000227667,9606.ENSP00000236850,9606.ENSP00000466775	APOC3,APOA1,APOC2
GO Process	GO:0048251	Elastic fiber assembly	3	12	1.25	0.039	9606.ENSP00000309953,9606.ENSP00000311905,9606.ENSP00000407685	EFEMP2,LTBP4,TNXB
GO Process	GO:0099151	Regulation of postsynaptic density assembly	3	12	1.25	0.039	9606.ENSP00000307549,9606.ENSP00000370593,9606.ENSP00000467537	NPTX1,PTPRD,PTPRS
GO Process	GO:1904062	Regulation of cation transmembrane transport	14	378	0.43	0.0411	9606.ENSP00000284981,9606.ENSP00000286713,9606.ENSP00000308541,9606.ENSP00000311713,9606.ENSP00000316779,9606.ENSP00000327116,9606.ENSP00000349320,9606.ENSP00000355627,9606.ENSP00000356790,9606.ENSP00000367263,9606.ENSP00000392423,9606.ENSP00000399376,9606.ENSP00000419260,9606.ENSP00000452786	APP,STOM,F2,OXSR1,BIN1,EHD3,CACNA2D1,AGT,ATP1B1,AHNAK,RELN,PRNP,PIK3CG,ITGB3
GO Process	GO:1905891	Regulation of cellular response to thapsigargin	2	2	1.86	0.0413	9606.ENSP00000284981,9606.ENSP00000315130	APP,CLU
GO Process	GO:1905894	Regulation of cellular response to tunicamycin	2	2	1.86	0.0413	9606.ENSP00000284981,9606.ENSP00000315130	APP,CLU
GO Process	GO:0048660	Regulation of smooth muscle cell proliferation	8	142	0.61	0.0414	9606.ENSP00000260356,9606.ENSP00000263388,9606.ENSP00000309953,9606.ENSP00000312999,9606.ENSP00000336762,9606.ENSP00000355627,9606.ENSP00000375978,9606.ENSP00000452786	THBS1,NOTCH3,EFEMP2,GNAI2,ANG,AGT,XRCC5,ITGB3
GO Process	GO:0050821	Protein stabilization	10	215	0.52	0.0421	9606.ENSP00000225655,9606.ENSP00000226355,9606.ENSP00000236850,9606.ENSP00000257192,9606.ENSP00000315130,9606.ENSP00000319464,9606.ENSP00000320866,9606.ENSP00000356790,9606.ENSP00000376506,9606.ENSP00000380070	PFN1,AFM,APOA1,DSG1,CLU,CPN2,CALR,ATP1B1,PDCD10,GAPDH
GO Process	GO:0048873	Homeostasis of number of cells within a tissue	4	30	0.98	0.043	9606.ENSP00000265462,9606.ENSP00000355518,9606.ENSP00000489597,9606.ENSP00000498587	PRDX5,FH,PTPN11,NOTCH1
GO Process	GO:0010596	Negative regulation of endothelial cell migration	5	53	0.83	0.0436	9606.ENSP00000205948,9606.ENSP00000232003,9606.ENSP00000260356,9606.ENSP00000376506,9606.ENSP00000498587	APOH,HRG,THBS1,PDCD10,NOTCH1
GO Process	GO:1902743	Regulation of lamellipodium organization	5	53	0.83	0.0436	9606.ENSP00000232003,9606.ENSP00000303908,9606.ENSP00000340211,9606.ENSP00000371798,9606.ENSP00000394496	HRG,TWF2,CORO1B,FSCN1,CORO1C
GO Process	GO:0048738	Cardiac muscle tissue development	9	179	0.56	0.0436	9606.ENSP00000212355,9606.ENSP00000256646,9606.ENSP00000320866,9606.ENSP00000355627,9606.ENSP00000357283,9606.ENSP00000369129,9606.ENSP00000467141,9606.ENSP00000491215,9606.ENSP00000498587	TGFBR3,NOTCH2,CALR,AGT,LMNA,DSP,TTN,HNRNPU,NOTCH1
GO Process	GO:0031349	Positive regulation of defense response	12	296	0.46	0.0436	9606.ENSP00000217407,9606.ENSP00000245907,9606.ENSP00000263025,9606.ENSP00000265983,9606.ENSP00000284981,9606.ENSP00000291744,9606.ENSP00000314067,9606.ENSP00000355627,9606.ENSP00000360871,9606.ENSP00000375978,9606.ENSP00000383364,9606.ENSP00000419260	LBP,C3,MAPK3,HPX,APP,FCN2,PAK2,AGT,FCN1,XRCC5,PLA2G2A,PIK3CG
GO Process	GO:0051338	Regulation of transferase activity	25	912	0.29	0.0436	9606.ENSP00000236850,9606.ENSP00000260356,9606.ENSP00000263025,9606.ENSP00000268182,9606.ENSP00000284981,9606.ENSP00000298510,9606.ENSP00000302486,9606.ENSP00000308541,9606.ENSP00000314067,9606.ENSP00000315130,9606.ENSP00000336762,9606.ENSP00000355627,9606.ENSP00000369042,9606.ENSP00000375978,9606.ENSP00000376506,9606.ENSP00000392423,9606.ENSP00000394496,9606.ENSP00000399376,9606.ENSP00000407685,…	APOA1,THBS1,MAPK3,IQGAP1,APP,PRDX3,MAP2K1,F2,PAK2,CLU,ANG,AGT,IPO7,XRCC5,PDCD10,RELN,CORO1C,PRNP,TNXB,PTPRC,PIK3CG,ITGB3,TTN,HNRNPU,SNX6
GO Process	GO:0060548	Negative regulation of cell death	27	1016	0.28	0.0436	9606.ENSP00000205948,9606.ENSP00000222271,9606.ENSP00000241052,9606.ENSP00000256646,9606.ENSP00000260356,9606.ENSP00000261772,9606.ENSP00000265462,9606.ENSP00000284981,9606.ENSP00000298510,9606.ENSP00000301522,9606.ENSP00000312999,9606.ENSP00000314067,9606.ENSP00000315130,9606.ENSP00000357283,9606.ENSP00000362409,9606.ENSP00000363827,9606.ENSP00000366109,9606.ENSP00000368884,9606.ENSP00000373489,…	APOH,COMP,CAT,NOTCH2,THBS1,AARS1,PRDX5,APP,PRDX3,PRDX2,GNAI2,PAK2,CLU,LMNA,NIBAN2,HSPG2,ANXA1,RPS6KA3,KRT18,PDCD10,CXCL12,PRNP,PIK3CG,ITGB3,ENO1,NOTCH1,SNX6
GO Process	GO:0048729	Tissue morphogenesis	18	565	0.36	0.0441	9606.ENSP00000212355,9606.ENSP00000225655,9606.ENSP00000256646,9606.ENSP00000265131,9606.ENSP00000269576,9606.ENSP00000302621,9606.ENSP00000309953,9606.ENSP00000360882,9606.ENSP00000362870,9606.ENSP00000369129,9606.ENSP00000369317,9606.ENSP00000372221,9606.ENSP00000373370,9606.ENSP00000376506,9606.ENSP00000452786,9606.ENSP00000467141,9606.ENSP00000498336,9606.ENSP00000498587	TGFBR3,PFN1,NOTCH2,TNC,KRT10,LRG1,EFEMP2,COL5A1,MATN1,DSP,KRT6A,SERPINB5,FLG2,PDCD10,ITGB3,TTN,MTHFD1,NOTCH1
GO Process	GO:1905954	Positive regulation of lipid localization	7	111	0.66	0.0443	9606.ENSP00000200676,9606.ENSP00000222381,9606.ENSP00000233242,9606.ENSP00000236850,9606.ENSP00000245907,9606.ENSP00000417138,9606.ENSP00000468236	CETP,PON1,APOB,APOA1,C3,PLTP,APOC4
GO Process	GO:0044403	Biological process involved in symbiotic interaction	11	257	0.49	0.0449	9606.ENSP00000232003,9606.ENSP00000255040,9606.ENSP00000286713,9606.ENSP00000296435,9606.ENSP00000308541,9606.ENSP00000317674,9606.ENSP00000360798,9606.ENSP00000369317,9606.ENSP00000380070,9606.ENSP00000452786,9606.ENSP00000481029	HRG,APCS,STOM,CAMP,F2,APOL1,EPS15,KRT6A,GAPDH,ITGB3,PSMC3
GO Process	GO:0002544	Chronic inflammatory response	3	13	1.22	0.0451	9606.ENSP00000207549,9606.ENSP00000260356,9606.ENSP00000296435	UNC13D,THBS1,CAMP
GO Process	GO:0007597	Blood coagulation, intrinsic pathway	3	13	1.22	0.0451	9606.ENSP00000205948,9606.ENSP00000218099,9606.ENSP00000253496	APOH,F9,F12
GO Process	GO:2001046	Positive regulation of integrin-mediated signaling pathway	3	13	1.22	0.0451	9606.ENSP00000222399,9606.ENSP00000258341,9606.ENSP00000264187	LAMB1,LAMC1,NID1
GO Process	GO:0044057	Regulation of system process	18	567	0.36	0.0451	9606.ENSP00000236850,9606.ENSP00000279022,9606.ENSP00000284981,9606.ENSP00000307549,9606.ENSP00000312999,9606.ENSP00000316779,9606.ENSP00000327116,9606.ENSP00000349320,9606.ENSP00000355627,9606.ENSP00000356790,9606.ENSP00000357283,9606.ENSP00000369129,9606.ENSP00000392423,9606.ENSP00000419260,9606.ENSP00000444688,9606.ENSP00000489597,9606.ENSP00000495530,9606.ENSP00000498587	APOA1,MYL9,APP,NPTX1,GNAI2,BIN1,EHD3,CACNA2D1,AGT,ATP1B1,LMNA,DSP,RELN,PIK3CG,ATP1A3,PTPN11,ENO1,NOTCH1
GO Process	GO:0045859	Regulation of protein kinase activity	20	663	0.34	0.0451	9606.ENSP00000260356,9606.ENSP00000268182,9606.ENSP00000284981,9606.ENSP00000302486,9606.ENSP00000314067,9606.ENSP00000315130,9606.ENSP00000336762,9606.ENSP00000355627,9606.ENSP00000369042,9606.ENSP00000375978,9606.ENSP00000376506,9606.ENSP00000392423,9606.ENSP00000394496,9606.ENSP00000399376,9606.ENSP00000407685,9606.ENSP00000411355,9606.ENSP00000419260,9606.ENSP00000452786,9606.ENSP00000467141,…	THBS1,IQGAP1,APP,MAP2K1,PAK2,CLU,ANG,AGT,IPO7,XRCC5,PDCD10,RELN,CORO1C,PRNP,TNXB,PTPRC,PIK3CG,ITGB3,TTN,SNX6
GO Process	GO:0008202	Steroid metabolic process	11	258	0.49	0.0457	9606.ENSP00000200676,9606.ENSP00000222381,9606.ENSP00000233242,9606.ENSP00000236850,9606.ENSP00000241052,9606.ENSP00000284981,9606.ENSP00000317674,9606.ENSP00000322706,9606.ENSP00000342850,9606.ENSP00000381250,9606.ENSP00000421725	CETP,PON1,APOB,APOA1,CAT,APP,APOL1,HMGCS1,SERPINA6,APOF,GC
GO Process	GO:0007009	Plasma membrane organization	8	146	0.6	0.0467	9606.ENSP00000262418,9606.ENSP00000315130,9606.ENSP00000316779,9606.ENSP00000333203,9606.ENSP00000349259,9606.ENSP00000360882,9606.ENSP00000381293,9606.ENSP00000411355	SLC4A1,CLU,BIN1,SERPINA5,SPTBN1,COL5A1,NSF,PTPRC
GO Process	GO:0010770	Positive regulation of cell morphogenesis involved in differentiation	6	82	0.72	0.0472	9606.ENSP00000207549,9606.ENSP00000236850,9606.ENSP00000320866,9606.ENSP00000370593,9606.ENSP00000392423,9606.ENSP00000452786	UNC13D,APOA1,CALR,PTPRD,RELN,ITGB3
GO Process	GO:0016052	Carbohydrate catabolic process	7	113	0.65	0.0475	9606.ENSP00000270776,9606.ENSP00000339933,9606.ENSP00000362413,9606.ENSP00000370517,9606.ENSP00000380070,9606.ENSP00000445175,9606.ENSP00000495530	PGD,PKLR,PGK1,PFKP,GAPDH,LDHA,ENO1
GO Process	GO:0023051	Regulation of signaling	67	3367	0.16	0.0475	9606.ENSP00000012443,9606.ENSP00000212355,9606.ENSP00000217407,9606.ENSP00000222399,9606.ENSP00000226218,9606.ENSP00000227667,9606.ENSP00000230036,9606.ENSP00000232003,9606.ENSP00000236850,9606.ENSP00000241052,9606.ENSP00000245907,9606.ENSP00000252804,9606.ENSP00000253354,9606.ENSP00000256646,9606.ENSP00000258341,9606.ENSP00000260356,9606.ENSP00000261405,9606.ENSP00000262746,9606.ENSP00000263025,…	PPP5C,TGFBR3,LBP,LAMB1,VTN,APOC3,GPLD1,HRG,APOA1,CAT,C3,PXDN,BPIFB1,NOTCH2,LAMC1,THBS1,VWF,PRDX1,MAPK3,NID1,HPX,IQGAP1,CDH11,APP,APPL1,PRDX2,MAP2K1,LRG1,NPTX1,F2,LTBP4,GNAI2,PAK2,CLU,CALR,EHD3,RPL22,ADAMTSL2,SPTBN1,AGT,LMNA,NIBAN2,ATF6B,F10,ANXA1,CLSTN1,POSTN,PTPRD,C1QTNF3,PDCD10,CXCL12,GAPDH,NSF,PLA2G2A,RELN,PRNP,PTPRC,PIK3CG,FBN2,ITGB3,PTPRS,CCL14,CCL18,PTPN11,ENO1,NOTCH1,SNX6
GO Process	GO:0043408	Regulation of MAPK cascade	20	668	0.33	0.0479	9606.ENSP00000256646,9606.ENSP00000260356,9606.ENSP00000262746,9606.ENSP00000263025,9606.ENSP00000268182,9606.ENSP00000284981,9606.ENSP00000301522,9606.ENSP00000302486,9606.ENSP00000312999,9606.ENSP00000314067,9606.ENSP00000355627,9606.ENSP00000376506,9606.ENSP00000383364,9606.ENSP00000411355,9606.ENSP00000419260,9606.ENSP00000452786,9606.ENSP00000479097,9606.ENSP00000479955,9606.ENSP00000489597,…	NOTCH2,THBS1,PRDX1,MAPK3,IQGAP1,APP,PRDX2,MAP2K1,GNAI2,PAK2,AGT,PDCD10,PLA2G2A,PTPRC,PIK3CG,ITGB3,CCL14,CCL18,PTPN11,NOTCH1
GO Process	GO:0042981	Regulation of apoptotic process	35	1462	0.24	0.0481	9606.ENSP00000205948,9606.ENSP00000222271,9606.ENSP00000230036,9606.ENSP00000232003,9606.ENSP00000241052,9606.ENSP00000245907,9606.ENSP00000256646,9606.ENSP00000260356,9606.ENSP00000261772,9606.ENSP00000265462,9606.ENSP00000284981,9606.ENSP00000298510,9606.ENSP00000301522,9606.ENSP00000312999,9606.ENSP00000314067,9606.ENSP00000315130,9606.ENSP00000316779,9606.ENSP00000320866,9606.ENSP00000351990,…	APOH,COMP,GPLD1,HRG,CAT,C3,NOTCH2,THBS1,AARS1,PRDX5,APP,PRDX3,PRDX2,GNAI2,PAK2,CLU,BIN1,CALR,NAE1,AGT,LMNA,ADAMTSL4,NIBAN2,ANXA1,RPS6KA3,KRT18,PDCD10,CXCL12,PRNP,PTPRC,PIK3CG,KNG1,ENO1,NOTCH1,SNX6
GO Process	GO:0009056	Catabolic process	44	1976	0.2	0.0481	9606.ENSP00000222381,9606.ENSP00000227667,9606.ENSP00000229268,9606.ENSP00000233242,9606.ENSP00000241052,9606.ENSP00000244137,9606.ENSP00000246337,9606.ENSP00000247461,9606.ENSP00000252804,9606.ENSP00000262746,9606.ENSP00000263025,9606.ENSP00000265462,9606.ENSP00000270776,9606.ENSP00000273450,9606.ENSP00000298510,9606.ENSP00000301522,9606.ENSP00000309474,9606.ENSP00000315130,9606.ENSP00000320866,…	PON1,APOC3,USP5,APOB,CAT,PEPD,UROD,CANX,PXDN,PRDX1,MAPK3,PRDX5,PGD,ALDH1L1,PRDX3,PRDX2,PSMD1,CLU,CALR,MGAT1,ANG,UBA1,PKLR,PCBP2,ACAT2,PGK1,PFKP,UROC1,GAPDH,PLA2G2A,CUL4B,BLVRA,PSMD14,RAB1A,PCYOX1,GSPT1,CPS1,LDHA,APOC2,UPP2,PSMC3,HBB,ENO1,NOTCH1
GO Process	GO:0048260	Positive regulation of receptor-mediated endocytosis	5	55	0.82	0.0482	9606.ENSP00000226218,9606.ENSP00000245907,9606.ENSP00000284981,9606.ENSP00000315130,9606.ENSP00000385834	VTN,C3,APP,CLU,TF
GO Process	GO:1901653	Cellular response to peptide	12	302	0.46	0.0485	9606.ENSP00000230036,9606.ENSP00000284981,9606.ENSP00000288266,9606.ENSP00000339933,9606.ENSP00000349320,9606.ENSP00000355627,9606.ENSP00000399376,9606.ENSP00000402608,9606.ENSP00000444688,9606.ENSP00000446007,9606.ENSP00000452786,9606.ENSP00000498872	GPLD1,APP,APPL1,PKLR,CACNA2D1,AGT,PRNP,CPS1,ATP1A3,VIM,ITGB3,SNX6
GO Process	GO:0031424	Keratinization	6	83	0.72	0.0491	9606.ENSP00000252242,9606.ENSP00000252244,9606.ENSP00000310861,9606.ENSP00000329243,9606.ENSP00000342710,9606.ENSP00000369317	KRT5,KRT1,KRT2,KRT7,KRT77,KRT6A

## Sheet: GNP
#category	term ID	term description	observed gene count	background gene count	strength	false discovery rate	matching proteins in your network (IDs)	matching proteins in your network (labels)
GO Component	GO:0005615	Extracellular space	31	3247	0.66	2.41e-13	9606.ENSP00000211998,9606.ENSP00000219150,9606.ENSP00000244930,9606.ENSP00000253109,9606.ENSP00000254301,9606.ENSP00000257867,9606.ENSP00000258787,9606.ENSP00000261336,9606.ENSP00000262919,9606.ENSP00000264710,9606.ENSP00000264870,9606.ENSP00000283752,9606.ENSP00000291009,9606.ENSP00000297258,9606.ENSP00000300289,9606.ENSP00000332723,9606.ENSP00000339467,9606.ENSP00000356382,9606.ENSP00000357453,…	VCL,CORO1A,SCGB2A1,ANGPTL6,LGALS3,LACRT,MYO1G,PZP,ATRN,RAB10,F13A1,SERPINB3,PIP,FABP5,PDIA3,COLEC10,RHOG,F13B,MAN1A1,ECM1,GSTO1,RAB14,GLIPR2,SHBG,KRT34,ALDOC,GSTP1,LAMP2,SBSN,TPM4,ALDOA
GO Component	GO:0070062	Extracellular exosome	25	2096	0.76	9.99e-12	9606.ENSP00000211998,9606.ENSP00000219150,9606.ENSP00000253109,9606.ENSP00000254301,9606.ENSP00000258787,9606.ENSP00000261336,9606.ENSP00000262919,9606.ENSP00000264710,9606.ENSP00000283752,9606.ENSP00000291009,9606.ENSP00000297258,9606.ENSP00000300289,9606.ENSP00000339467,9606.ENSP00000357453,9606.ENSP00000358045,9606.ENSP00000358727,9606.ENSP00000362946,9606.ENSP00000367196,9606.ENSP00000369816,…	VCL,CORO1A,ANGPTL6,LGALS3,MYO1G,PZP,ATRN,RAB10,SERPINB3,PIP,FABP5,PDIA3,RHOG,MAN1A1,ECM1,GSTO1,RAB14,GLIPR2,SHBG,ALDOC,GSTP1,LAMP2,SBSN,TPM4,ALDOA
GO Component	GO:0005576	Extracellular region	32	4175	0.57	9.99e-12	9606.ENSP00000211998,9606.ENSP00000219150,9606.ENSP00000244930,9606.ENSP00000253109,9606.ENSP00000254301,9606.ENSP00000257867,9606.ENSP00000258787,9606.ENSP00000261336,9606.ENSP00000262919,9606.ENSP00000264710,9606.ENSP00000264870,9606.ENSP00000283752,9606.ENSP00000291009,9606.ENSP00000297258,9606.ENSP00000300289,9606.ENSP00000332723,9606.ENSP00000339467,9606.ENSP00000356382,9606.ENSP00000357453,…	VCL,CORO1A,SCGB2A1,ANGPTL6,LGALS3,LACRT,MYO1G,PZP,ATRN,RAB10,F13A1,SERPINB3,PIP,FABP5,PDIA3,COLEC10,RHOG,F13B,MAN1A1,ECM1,GSTO1,RAB14,GLIPR2,SHBG,KRT34,ALDOC,GSTP1,ROCK1,LAMP2,SBSN,TPM4,ALDOA
GO Component	GO:0031982	Vesicle	29	3957	0.55	1.14e-09	9606.ENSP00000211998,9606.ENSP00000219150,9606.ENSP00000253109,9606.ENSP00000254301,9606.ENSP00000257867,9606.ENSP00000258787,9606.ENSP00000261336,9606.ENSP00000262919,9606.ENSP00000264710,9606.ENSP00000264870,9606.ENSP00000283752,9606.ENSP00000291009,9606.ENSP00000297258,9606.ENSP00000300289,9606.ENSP00000301945,9606.ENSP00000339467,9606.ENSP00000357453,9606.ENSP00000358045,9606.ENSP00000358727,…	VCL,CORO1A,ANGPTL6,LGALS3,LACRT,MYO1G,PZP,ATRN,RAB10,F13A1,SERPINB3,PIP,FABP5,PDIA3,ANTXR1,RHOG,MAN1A1,ECM1,GSTO1,RAB14,GLIPR2,SHBG,ALDOC,GSTP1,ROCK1,LAMP2,SBSN,TPM4,ALDOA
GO Component	GO:0030141	Secretory granule	16	873	0.94	2.29e-09	9606.ENSP00000211998,9606.ENSP00000253109,9606.ENSP00000254301,9606.ENSP00000257867,9606.ENSP00000264710,9606.ENSP00000264870,9606.ENSP00000283752,9606.ENSP00000297258,9606.ENSP00000339467,9606.ENSP00000358045,9606.ENSP00000362946,9606.ENSP00000378731,9606.ENSP00000381607,9606.ENSP00000382697,9606.ENSP00000408411,9606.ENSP00000496166	VCL,ANGPTL6,LGALS3,LACRT,RAB10,F13A1,SERPINB3,FABP5,RHOG,ECM1,RAB14,ALDOC,GSTP1,ROCK1,LAMP2,ALDOA
GO Component	GO:0034774	Secretory granule lumen	9	321	1.13	4.07e-06	9606.ENSP00000211998,9606.ENSP00000264870,9606.ENSP00000283752,9606.ENSP00000297258,9606.ENSP00000358045,9606.ENSP00000378731,9606.ENSP00000381607,9606.ENSP00000382697,9606.ENSP00000496166	VCL,F13A1,SERPINB3,FABP5,ECM1,ALDOC,GSTP1,ROCK1,ALDOA
GO Component	GO:0031410	Cytoplasmic vesicle	20	2482	0.59	4.07e-06	9606.ENSP00000211998,9606.ENSP00000219150,9606.ENSP00000253109,9606.ENSP00000254301,9606.ENSP00000257867,9606.ENSP00000264710,9606.ENSP00000264870,9606.ENSP00000283752,9606.ENSP00000297258,9606.ENSP00000300289,9606.ENSP00000301945,9606.ENSP00000339467,9606.ENSP00000357453,9606.ENSP00000358045,9606.ENSP00000362946,9606.ENSP00000378731,9606.ENSP00000381607,9606.ENSP00000382697,9606.ENSP00000408411,…	VCL,CORO1A,ANGPTL6,LGALS3,LACRT,RAB10,F13A1,SERPINB3,FABP5,PDIA3,ANTXR1,RHOG,MAN1A1,ECM1,RAB14,ALDOC,GSTP1,ROCK1,LAMP2,ALDOA
GO Component	GO:0101002	ficolin-1-rich granule	6	185	1.19	0.00033	9606.ENSP00000211998,9606.ENSP00000254301,9606.ENSP00000378731,9606.ENSP00000381607,9606.ENSP00000408411,9606.ENSP00000496166	VCL,LGALS3,ALDOC,GSTP1,LAMP2,ALDOA
GO Component	GO:0012505	Endomembrane system	24	4721	0.39	0.00033	9606.ENSP00000211998,9606.ENSP00000219150,9606.ENSP00000240851,9606.ENSP00000253109,9606.ENSP00000254301,9606.ENSP00000257867,9606.ENSP00000264710,9606.ENSP00000264870,9606.ENSP00000283752,9606.ENSP00000297258,9606.ENSP00000300289,9606.ENSP00000301945,9606.ENSP00000332723,9606.ENSP00000339467,9606.ENSP00000357453,9606.ENSP00000358045,9606.ENSP00000362946,9606.ENSP00000367196,9606.ENSP00000378725,…	VCL,CORO1A,TFG,ANGPTL6,LGALS3,LACRT,RAB10,F13A1,SERPINB3,FABP5,PDIA3,ANTXR1,COLEC10,RHOG,MAN1A1,ECM1,RAB14,GLIPR2,KTN1,ALDOC,GSTP1,ROCK1,LAMP2,ALDOA
GO Component	GO:0045335	Phagocytic vesicle	5	139	1.24	0.0014	9606.ENSP00000219150,9606.ENSP00000264710,9606.ENSP00000300289,9606.ENSP00000362946,9606.ENSP00000408411	CORO1A,RAB10,PDIA3,RAB14,LAMP2
GO Component	GO:0070820	Tertiary granule	5	164	1.17	0.0027	9606.ENSP00000254301,9606.ENSP00000362946,9606.ENSP00000378731,9606.ENSP00000408411,9606.ENSP00000496166	LGALS3,RAB14,ALDOC,LAMP2,ALDOA
GO Component	GO:0005925	Focal adhesion	7	416	0.91	0.0027	9606.ENSP00000211998,9606.ENSP00000264710,9606.ENSP00000300289,9606.ENSP00000307513,9606.ENSP00000337598,9606.ENSP00000339467,9606.ENSP00000494125	VCL,RAB10,PDIA3,MRC2,LIMS1,RHOG,TPM4
GO Component	GO:0030667	Secretory granule membrane	6	308	0.97	0.0042	9606.ENSP00000254301,9606.ENSP00000264710,9606.ENSP00000297258,9606.ENSP00000339467,9606.ENSP00000362946,9606.ENSP00000408411	LGALS3,RAB10,FABP5,RHOG,RAB14,LAMP2
GO Component	GO:0030863	Cortical cytoskeleton	4	102	1.28	0.0064	9606.ENSP00000211998,9606.ENSP00000219150,9606.ENSP00000354826,9606.ENSP00000494125	VCL,CORO1A,CALD1,TPM4
GO Component	GO:1904813	ficolin-1-rich granule lumen	4	124	1.19	0.0126	9606.ENSP00000211998,9606.ENSP00000378731,9606.ENSP00000381607,9606.ENSP00000496166	VCL,ALDOC,GSTP1,ALDOA
GO Component	GO:0070161	Anchoring junction	10	1325	0.56	0.0267	9606.ENSP00000211998,9606.ENSP00000219150,9606.ENSP00000264710,9606.ENSP00000297258,9606.ENSP00000300289,9606.ENSP00000307513,9606.ENSP00000337598,9606.ENSP00000339467,9606.ENSP00000366694,9606.ENSP00000494125	VCL,CORO1A,RAB10,FABP5,PDIA3,MRC2,LIMS1,RHOG,KCTD12,TPM4
GO Component	GO:0005938	Cell cortex	5	304	0.9	0.0352	9606.ENSP00000211998,9606.ENSP00000219150,9606.ENSP00000339467,9606.ENSP00000354826,9606.ENSP00000494125	VCL,CORO1A,RHOG,CALD1,TPM4
GO Component	GO:0015629	Actin cytoskeleton	6	482	0.78	0.0376	9606.ENSP00000211998,9606.ENSP00000219150,9606.ENSP00000258787,9606.ENSP00000354826,9606.ENSP00000494125,9606.ENSP00000496166	VCL,CORO1A,MYO1G,CALD1,TPM4,ALDOA
GO Component	GO:0030864	Cortical actin cytoskeleton	3	73	1.3	0.0399	9606.ENSP00000211998,9606.ENSP00000219150,9606.ENSP00000354826	VCL,CORO1A,CALD1
GO Component	GO:0030670	Phagocytic vesicle membrane	3	76	1.28	0.0431	9606.ENSP00000219150,9606.ENSP00000264710,9606.ENSP00000408411	CORO1A,RAB10,LAMP2
GO Component	GO:0071944	Cell periphery	23	6015	0.26	0.0431	9606.ENSP00000211998,9606.ENSP00000216554,9606.ENSP00000219150,9606.ENSP00000253109,9606.ENSP00000254301,9606.ENSP00000258787,9606.ENSP00000262919,9606.ENSP00000264710,9606.ENSP00000264870,9606.ENSP00000297258,9606.ENSP00000301945,9606.ENSP00000332723,9606.ENSP00000337598,9606.ENSP00000339467,9606.ENSP00000354826,9606.ENSP00000358045,9606.ENSP00000362946,9606.ENSP00000366694,9606.ENSP00000378725,…	VCL,EIF5,CORO1A,ANGPTL6,LGALS3,MYO1G,ATRN,RAB10,F13A1,FABP5,ANTXR1,COLEC10,LIMS1,RHOG,CALD1,ECM1,RAB14,KCTD12,KTN1,ROCK1,LAMP2,TPM4,SLC29A1
GO Component	GO:0030659	Cytoplasmic vesicle membrane	9	1190	0.56	0.0446	9606.ENSP00000219150,9606.ENSP00000254301,9606.ENSP00000264710,9606.ENSP00000297258,9606.ENSP00000300289,9606.ENSP00000301945,9606.ENSP00000339467,9606.ENSP00000362946,9606.ENSP00000408411	CORO1A,LGALS3,RAB10,FABP5,PDIA3,ANTXR1,RHOG,RAB14,LAMP2
GO Function	GO:0008092	Cytoskeletal protein binding	13	1002	0.79	0.00037	9606.ENSP00000211998,9606.ENSP00000219150,9606.ENSP00000258787,9606.ENSP00000264710,9606.ENSP00000291009,9606.ENSP00000301945,9606.ENSP00000354826,9606.ENSP00000362946,9606.ENSP00000378725,9606.ENSP00000378731,9606.ENSP00000382697,9606.ENSP00000494125,9606.ENSP00000496166	VCL,CORO1A,MYO1G,RAB10,PIP,ANTXR1,CALD1,RAB14,KTN1,ALDOC,ROCK1,TPM4,ALDOA
GO Function	GO:0005515	Protein binding	30	7242	0.3	0.0059	9606.ENSP00000211998,9606.ENSP00000216554,9606.ENSP00000219150,9606.ENSP00000240851,9606.ENSP00000253109,9606.ENSP00000254301,9606.ENSP00000257867,9606.ENSP00000258787,9606.ENSP00000261336,9606.ENSP00000264710,9606.ENSP00000283752,9606.ENSP00000291009,9606.ENSP00000297258,9606.ENSP00000300289,9606.ENSP00000301945,9606.ENSP00000332723,9606.ENSP00000337598,9606.ENSP00000339467,9606.ENSP00000354826,…	VCL,EIF5,CORO1A,TFG,ANGPTL6,LGALS3,LACRT,MYO1G,PZP,RAB10,SERPINB3,PIP,FABP5,PDIA3,ANTXR1,COLEC10,LIMS1,RHOG,CALD1,ECM1,RAB14,KCTD12,GLIPR2,KTN1,ALDOC,GSTP1,ROCK1,LAMP2,TPM4,ALDOA
GO Function	GO:0003779	Actin binding	8	448	0.93	0.0061	9606.ENSP00000211998,9606.ENSP00000219150,9606.ENSP00000258787,9606.ENSP00000291009,9606.ENSP00000301945,9606.ENSP00000354826,9606.ENSP00000494125,9606.ENSP00000496166	VCL,CORO1A,MYO1G,PIP,ANTXR1,CALD1,TPM4,ALDOA
GO Function	GO:0017022	Myosin binding	4	73	1.42	0.0239	9606.ENSP00000219150,9606.ENSP00000264710,9606.ENSP00000354826,9606.ENSP00000362946	CORO1A,RAB10,CALD1,RAB14
GO Function	GO:0043236	Laminin binding	3	28	1.71	0.0354	9606.ENSP00000254301,9606.ENSP00000257867,9606.ENSP00000358045	LGALS3,LACRT,ECM1

## Sheet: GO component comparison
NM	#category	term ID	term description	observed gene count	background gene count	strength	false discovery rate	matching proteins in your network (IDs)	matching proteins in your network (labels)
GNP	GO Component	GO:0030864	Cortical actin cytoskeleton	3	73	1.3	0.0399	9606.ENSP00000211998,9606.ENSP00000219150,9606.ENSP00000354826	VCL,CORO1A,CALD1
GNP	GO Component	GO:0030863	Cortical cytoskeleton	4	102	1.28	0.0064	9606.ENSP00000211998,9606.ENSP00000219150,9606.ENSP00000354826,9606.ENSP00000494125	VCL,CORO1A,CALD1,TPM4
GNP	GO Component	GO:0030670	Phagocytic vesicle membrane	3	76	1.28	0.0431	9606.ENSP00000219150,9606.ENSP00000264710,9606.ENSP00000408411	CORO1A,RAB10,LAMP2
GNP	GO Component	GO:0045335	Phagocytic vesicle	5	139	1.24	0.0014	9606.ENSP00000219150,9606.ENSP00000264710,9606.ENSP00000300289,9606.ENSP00000362946,9606.ENSP00000408411	CORO1A,RAB10,PDIA3,RAB14,LAMP2
GNP	GO Component	GO:0030667	Secretory granule membrane	6	308	0.97	0.0042	9606.ENSP00000254301,9606.ENSP00000264710,9606.ENSP00000297258,9606.ENSP00000339467,9606.ENSP00000362946,9606.ENSP00000408411	LGALS3,RAB10,FABP5,RHOG,RAB14,LAMP2
GNP	GO Component	GO:0030659	Cytoplasmic vesicle membrane	9	1190	0.56	0.0446	9606.ENSP00000219150,9606.ENSP00000254301,9606.ENSP00000264710,9606.ENSP00000297258,9606.ENSP00000300289,9606.ENSP00000301945,9606.ENSP00000339467,9606.ENSP00000362946,9606.ENSP00000408411	CORO1A,LGALS3,RAB10,FABP5,PDIA3,ANTXR1,RHOG,RAB14,LAMP2
GO	GO Component	GO:0005589	Collagen type VI trimer	2	2	1.86	0.0249	9606.ENSP00000295550,9606.ENSP00000355180	COL6A3,COL6A1
GO	GO Component	GO:0005579	Membrane attack complex	6	7	1.79	4.87e-07	9606.ENSP00000223642,9606.ENSP00000263408,9606.ENSP00000322061,9606.ENSP00000354458,9606.ENSP00000360281,9606.ENSP00000360697	C5,C9,C7,C8A,C8B,C8G
GO	GO Component	GO:0034363	Intermediate-density lipoprotein particle	4	5	1.76	0.00015	9606.ENSP00000227667,9606.ENSP00000233242,9606.ENSP00000284981,9606.ENSP00000466775	APOC3,APOB,APP,APOC2
GO	GO Component	GO:0034366	Spherical high-density lipoprotein particle	6	8	1.73	7.86e-07	9606.ENSP00000222381,9606.ENSP00000227667,9606.ENSP00000236850,9606.ENSP00000315130,9606.ENSP00000441828,9606.ENSP00000466775	PON1,APOC3,APOA1,CLU,HPR,APOC2
GO	GO Component	GO:0005601	Classical-complement-pathway C3/C5 convertase complex	3	4	1.73	0.0024	9606.ENSP00000299367,9606.ENSP00000415941,9606.ENSP00000416561	C2,C4B,CFB
GO	GO Component	GO:0005606	laminin-1 complex	2	3	1.68	0.0366	9606.ENSP00000222399,9606.ENSP00000258341	LAMB1,LAMC1
GO	GO Component	GO:0030934	Anchoring collagen complex	2	3	1.68	0.0366	9606.ENSP00000297848,9606.ENSP00000325146	COL14A1,COL12A1
GO	GO Component	GO:0043259	laminin-10 complex	2	3	1.68	0.0366	9606.ENSP00000222399,9606.ENSP00000258341	LAMB1,LAMC1
GO	GO Component	GO:0062167	Complement component C1q complex	2	3	1.68	0.0366	9606.ENSP00000313967,9606.ENSP00000363770	C1QB,C1QC
GO	GO Component	GO:0071062	alphav-beta3 integrin-vitronectin complex	2	3	1.68	0.0366	9606.ENSP00000226218,9606.ENSP00000452786	VTN,ITGB3
GO	GO Component	GO:0005602	Complement component C1 complex	3	5	1.63	0.0037	9606.ENSP00000313967,9606.ENSP00000363770,9606.ENSP00000444271	C1QB,C1QC,C1R
GO	GO Component	GO:0034364	High-density lipoprotein particle	14	29	1.54	3.48e-14	9606.ENSP00000200676,9606.ENSP00000205948,9606.ENSP00000222381,9606.ENSP00000227667,9606.ENSP00000233242,9606.ENSP00000236850,9606.ENSP00000284981,9606.ENSP00000315130,9606.ENSP00000317674,9606.ENSP00000381250,9606.ENSP00000417138,9606.ENSP00000441828,9606.ENSP00000466775,9606.ENSP00000468236	CETP,APOH,PON1,APOC3,APOB,APOA1,APP,CLU,APOL1,APOF,PLTP,HPR,APOC2,APOC4
GO	GO Component	GO:0034385	Triglyceride-rich plasma lipoprotein particle	9	21	1.49	1.04e-08	9606.ENSP00000205948,9606.ENSP00000227667,9606.ENSP00000233242,9606.ENSP00000236850,9606.ENSP00000284981,9606.ENSP00000317674,9606.ENSP00000387654,9606.ENSP00000466775,9606.ENSP00000468236	APOH,APOC3,APOB,APOA1,APP,APOL1,PCYOX1,APOC2,APOC4
GO	GO Component	GO:0034361	Very-low-density lipoprotein particle	8	20	1.46	1.5e-07	9606.ENSP00000205948,9606.ENSP00000227667,9606.ENSP00000233242,9606.ENSP00000236850,9606.ENSP00000317674,9606.ENSP00000387654,9606.ENSP00000466775,9606.ENSP00000468236	APOH,APOC3,APOB,APOA1,APOL1,PCYOX1,APOC2,APOC4
GO	GO Component	GO:0032994	Protein-lipid complex	16	41	1.45	5.19e-15	9606.ENSP00000200676,9606.ENSP00000205948,9606.ENSP00000222381,9606.ENSP00000227667,9606.ENSP00000233242,9606.ENSP00000236850,9606.ENSP00000284981,9606.ENSP00000315130,9606.ENSP00000316779,9606.ENSP00000317674,9606.ENSP00000381250,9606.ENSP00000387654,9606.ENSP00000417138,9606.ENSP00000441828,9606.ENSP00000466775,9606.ENSP00000468236	CETP,APOH,PON1,APOC3,APOB,APOA1,APP,CLU,BIN1,APOL1,APOF,PCYOX1,PLTP,HPR,APOC2,APOC4
GO	GO Component	GO:0034358	Plasma lipoprotein particle	15	38	1.45	3.48e-14	9606.ENSP00000200676,9606.ENSP00000205948,9606.ENSP00000222381,9606.ENSP00000227667,9606.ENSP00000233242,9606.ENSP00000236850,9606.ENSP00000284981,9606.ENSP00000315130,9606.ENSP00000317674,9606.ENSP00000381250,9606.ENSP00000387654,9606.ENSP00000417138,9606.ENSP00000441828,9606.ENSP00000466775,9606.ENSP00000468236	CETP,APOH,PON1,APOC3,APOB,APOA1,APP,CLU,APOL1,APOF,PCYOX1,PLTP,HPR,APOC2,APOC4
GO	GO Component	GO:0042627	Chylomicron	5	13	1.44	0.00013	9606.ENSP00000205948,9606.ENSP00000227667,9606.ENSP00000233242,9606.ENSP00000236850,9606.ENSP00000466775	APOH,APOC3,APOB,APOA1,APOC2
GO	GO Component	GO:0072562	Blood microparticle	43	118	1.42	3.35e-41	9606.ENSP00000222381,9606.ENSP00000225655,9606.ENSP00000226218,9606.ENSP00000226355,9606.ENSP00000232003,9606.ENSP00000236850,9606.ENSP00000245907,9606.ENSP00000252244,9606.ENSP00000255040,9606.ENSP00000259396,9606.ENSP00000262407,9606.ENSP00000262418,9606.ENSP00000262776,9606.ENSP00000263100,9606.ENSP00000263408,9606.ENSP00000264613,9606.ENSP00000265983,9606.ENSP00000273283,9606.ENSP00000286713,…	PON1,PFN1,VTN,AFM,HRG,APOA1,C3,KRT1,APCS,ORM1,ITGA2B,SLC4A1,LGALS3BP,A1BG,C9,CP,HPX,ITIH1,STOM,FCN2,F2,C1QB,CLU,APOL1,CPN2,A2M,ITIH2,C8A,AGT,CFH,C8G,C1QC,PROS1,TF,C4B,CFB,GC,HPR,C1R,SERPINA3,IGHD,KNG1,HBB
GO	GO Component	GO:0098637	Protein complex involved in cell-matrix adhesion	5	14	1.41	0.00016	9606.ENSP00000222399,9606.ENSP00000226218,9606.ENSP00000258341,9606.ENSP00000264187,9606.ENSP00000265131	LAMB1,VTN,LAMC1,NID1,TNC
GO	GO Component	GO:0031232	Extrinsic component of external side of plasma membrane	3	9	1.38	0.013	9606.ENSP00000360871,9606.ENSP00000366109,9606.ENSP00000385834	FCN1,ANXA1,TF
GO	GO Component	GO:1905370	Serine-type endopeptidase complex	8	26	1.34	7.19e-07	9606.ENSP00000218099,9606.ENSP00000245907,9606.ENSP00000253496,9606.ENSP00000291744,9606.ENSP00000308541,9606.ENSP00000356399,9606.ENSP00000360871,9606.ENSP00000364709	F9,C3,F12,FCN2,F2,CFH,FCN1,F10
GO	GO Component	GO:0005614	Interstitial matrix	3	12	1.25	0.0241	9606.ENSP00000265131,9606.ENSP00000297848,9606.ENSP00000358035	TNC,COL14A1,ADAMTSL4
GO	GO Component	GO:0034362	Low-density lipoprotein particle	3	12	1.25	0.0241	9606.ENSP00000233242,9606.ENSP00000381250,9606.ENSP00000466775	APOB,APOF,APOC2
GO	GO Component	GO:0001527	Microfibril	3	13	1.22	0.0264	9606.ENSP00000309953,9606.ENSP00000311905,9606.ENSP00000424571	EFEMP2,LTBP4,FBN2
GO	GO Component	GO:0071682	Endocytic vesicle lumen	5	23	1.19	0.0011	9606.ENSP00000233242,9606.ENSP00000236850,9606.ENSP00000265983,9606.ENSP00000320866,9606.ENSP00000494175	APOB,APOA1,HPX,CALR,HBB
GO	GO Component	GO:0031093	Platelet alpha granule lumen	13	66	1.15	3.81e-09	9606.ENSP00000232003,9606.ENSP00000259396,9606.ENSP00000260356,9606.ENSP00000261405,9606.ENSP00000263100,9606.ENSP00000279227,9606.ENSP00000284981,9606.ENSP00000315130,9606.ENSP00000323929,9606.ENSP00000377783,9606.ENSP00000416066,9606.ENSP00000450540,9606.ENSP00000493985	HRG,ORM1,THBS1,VWF,A1BG,FERMT3,APP,CLU,A2M,PROS1,SERPINA1,SERPINA3,KNG1
GO	GO Component	GO:0001533	Cornified envelope	11	59	1.13	1.5e-07	9606.ENSP00000252244,9606.ENSP00000257192,9606.ENSP00000269576,9606.ENSP00000310861,9606.ENSP00000318195,9606.ENSP00000342710,9606.ENSP00000366109,9606.ENSP00000369129,9606.ENSP00000372218,9606.ENSP00000372221,9606.ENSP00000373370	KRT1,DSG1,KRT10,KRT2,NCL,KRT77,ANXA1,DSP,SERPINB12,SERPINB5,FLG2
GO	GO Component	GO:0043034	Costamere	3	16	1.13	0.0402	9606.ENSP00000327145,9606.ENSP00000355124,9606.ENSP00000367263	FLNC,KRT19,AHNAK
GO	GO Component	GO:0031091	Platelet alpha granule	16	89	1.11	9.49e-11	9606.ENSP00000232003,9606.ENSP00000259396,9606.ENSP00000260356,9606.ENSP00000261405,9606.ENSP00000262407,9606.ENSP00000263100,9606.ENSP00000279227,9606.ENSP00000284981,9606.ENSP00000315130,9606.ENSP00000323929,9606.ENSP00000333203,9606.ENSP00000377783,9606.ENSP00000416066,9606.ENSP00000450540,9606.ENSP00000452786,9606.ENSP00000493985	HRG,ORM1,THBS1,VWF,ITGA2B,A1BG,FERMT3,APP,CLU,A2M,SERPINA5,PROS1,SERPINA1,SERPINA3,ITGB3,KNG1
GO	GO Component	GO:0062023	Collagen-containing extracellular matrix	63	407	1.05	8.41e-42	9606.ENSP00000205948,9606.ENSP00000218099,9606.ENSP00000222271,9606.ENSP00000222399,9606.ENSP00000223357,9606.ENSP00000226218,9606.ENSP00000227667,9606.ENSP00000232003,9606.ENSP00000236850,9606.ENSP00000252244,9606.ENSP00000252804,9606.ENSP00000253496,9606.ENSP00000254898,9606.ENSP00000255040,9606.ENSP00000258341,9606.ENSP00000259396,9606.ENSP00000260356,9606.ENSP00000261405,9606.ENSP00000262776,…	APOH,F9,COMP,LAMB1,AEBP1,VTN,APOC3,HRG,APOA1,KRT1,PXDN,F12,MATN2,APCS,LAMC1,ORM1,THBS1,VWF,LGALS3BP,A1BG,NID1,TNC,HPX,LUM,ITIH1,FCN2,AZGP1,COL6A3,COL14A1,COL6A2,F2,EFEMP2,LTBP4,C1QB,CLU,CALR,A2M,COL12A1,ANG,ITIH2,COL18A1,COL6A1,AGT,THBS3,ADAMTSL4,FCN1,COL5A1,MATN4,MATN1,C1QC,HSPG2,ANXA1,POSTN,SERPINB12,SSC5D,EFEMP1,CXCL12,MATN3,TNXB,SERPINA1,FBN2,SERPINA3,KNG1
GO	GO Component	GO:0005581	Collagen trimer	13	95	0.99	1.51e-07	9606.ENSP00000266718,9606.ENSP00000291744,9606.ENSP00000295550,9606.ENSP00000297848,9606.ENSP00000300527,9606.ENSP00000313967,9606.ENSP00000325146,9606.ENSP00000352798,9606.ENSP00000355180,9606.ENSP00000360871,9606.ENSP00000360882,9606.ENSP00000363770,9606.ENSP00000371497	LUM,FCN2,COL6A3,COL14A1,COL6A2,C1QB,COL12A1,COL18A1,COL6A1,FCN1,COL5A1,C1QC,C1QTNF3
GO	GO Component	GO:0098636	Protein complex involved in cell adhesion	7	52	0.99	0.00049	9606.ENSP00000222399,9606.ENSP00000226218,9606.ENSP00000258341,9606.ENSP00000262407,9606.ENSP00000264187,9606.ENSP00000265131,9606.ENSP00000452786	LAMB1,VTN,LAMC1,ITGA2B,NID1,TNC,ITGB3
GO	GO Component	GO:0005790	Smooth endoplasmic reticulum	4	30	0.98	0.0249	9606.ENSP00000233242,9606.ENSP00000247461,9606.ENSP00000284981,9606.ENSP00000320866	APOB,CANX,APP,CALR
GO	GO Component	GO:0031012	Extracellular matrix	71	552	0.97	1.27e-42	9606.ENSP00000205948,9606.ENSP00000212355,9606.ENSP00000218099,9606.ENSP00000222271,9606.ENSP00000222399,9606.ENSP00000223357,9606.ENSP00000226218,9606.ENSP00000227667,9606.ENSP00000230036,9606.ENSP00000232003,9606.ENSP00000236850,9606.ENSP00000252244,9606.ENSP00000252804,9606.ENSP00000253496,9606.ENSP00000254898,9606.ENSP00000255040,9606.ENSP00000258341,9606.ENSP00000259396,9606.ENSP00000260356,…	APOH,TGFBR3,F9,COMP,LAMB1,AEBP1,VTN,APOC3,GPLD1,HRG,APOA1,KRT1,PXDN,F12,MATN2,APCS,LAMC1,ORM1,THBS1,VWF,LGALS3BP,A1BG,NID1,TNC,HPX,LUM,ITIH1,FCN2,AZGP1,COL6A3,COL14A1,COL6A2,F2,SNED1,EFEMP2,LTBP4,C1QB,CLU,CPN2,CALR,SPOCK2,A2M,COL12A1,ANG,ADAMTSL2,ITIH2,COL18A1,COL6A1,AGT,THBS3,ADAMTSL4,FCN1,COL5A1,MATN4,MATN1,C1QC,HSPG2,ANXA1,POSTN,SERPINB12,SSC5D,EFEMP1,CXCL12,MATN3,RELN,TNXB,SERPINA1,IGFALS,FBN…
GO	GO Component	GO:0005788	Endoplasmic reticulum lumen	35	312	0.91	3.62e-18	9606.ENSP00000215727,9606.ENSP00000218099,9606.ENSP00000222399,9606.ENSP00000226218,9606.ENSP00000233242,9606.ENSP00000236850,9606.ENSP00000245907,9606.ENSP00000247461,9606.ENSP00000258341,9606.ENSP00000260356,9606.ENSP00000263025,9606.ENSP00000264613,9606.ENSP00000265131,9606.ENSP00000284981,9606.ENSP00000295550,9606.ENSP00000297848,9606.ENSP00000300527,9606.ENSP00000308541,9606.ENSP00000315130,…	SERPIND1,F9,LAMB1,VTN,APOB,APOA1,C3,CANX,LAMC1,THBS1,MAPK3,CP,TNC,APP,COL6A3,COL14A1,COL6A2,F2,CLU,APOL1,CALR,COL12A1,GANAB,ITIH2,COL18A1,COL6A1,ADAMTSL4,COL5A1,MINPP1,F10,MATN3,PDIA6,TF,SERPINA1,KNG1
GO	GO Component	GO:0005604	Basement membrane	11	98	0.91	1.32e-05	9606.ENSP00000222399,9606.ENSP00000226218,9606.ENSP00000252804,9606.ENSP00000258341,9606.ENSP00000264187,9606.ENSP00000265131,9606.ENSP00000309953,9606.ENSP00000336762,9606.ENSP00000352798,9606.ENSP00000360882,9606.ENSP00000363827	LAMB1,VTN,PXDN,LAMC1,NID1,TNC,EFEMP2,ANG,COL18A1,COL5A1,HSPG2
GO	GO Component	GO:1904724	Tertiary granule lumen	6	55	0.89	0.0049	9606.ENSP00000259396,9606.ENSP00000296435,9606.ENSP00000302621,9606.ENSP00000373370,9606.ENSP00000487444,9606.ENSP00000494175	ORM1,CAMP,LRG1,FLG2,SPTAN1,HBB
GO	GO Component	GO:1905369	Endopeptidase complex	11	104	0.88	2.19e-05	9606.ENSP00000218099,9606.ENSP00000245907,9606.ENSP00000253496,9606.ENSP00000291744,9606.ENSP00000308541,9606.ENSP00000309474,9606.ENSP00000356399,9606.ENSP00000360871,9606.ENSP00000364709,9606.ENSP00000386541,9606.ENSP00000481029	F9,C3,F12,FCN2,F2,PSMD1,CFH,FCN1,F10,PSMD14,PSMC3
GO	GO Component	GO:0031672	A band	4	38	0.88	0.0475	9606.ENSP00000349259,9606.ENSP00000389168,9606.ENSP00000467141,9606.ENSP00000495530	SPTBN1,PPP1R12A,TTN,ENO1
GO	GO Component	GO:0045095	Keratin filament	10	100	0.86	0.00011	9606.ENSP00000167586,9606.ENSP00000246635,9606.ENSP00000252242,9606.ENSP00000252244,9606.ENSP00000269576,9606.ENSP00000310861,9606.ENSP00000329243,9606.ENSP00000342710,9606.ENSP00000369317,9606.ENSP00000373489	KRT14,KRT13,KRT5,KRT1,KRT10,KRT2,KRT7,KRT77,KRT6A,KRT18
GO	GO Component	GO:0031983	Vesicle lumen	32	326	0.85	5.24e-15	9606.ENSP00000205948,9606.ENSP00000207549,9606.ENSP00000232003,9606.ENSP00000233242,9606.ENSP00000236850,9606.ENSP00000241052,9606.ENSP00000245907,9606.ENSP00000259396,9606.ENSP00000260356,9606.ENSP00000261405,9606.ENSP00000262776,9606.ENSP00000263100,9606.ENSP00000271638,9606.ENSP00000279227,9606.ENSP00000284981,9606.ENSP00000290158,9606.ENSP00000296435,9606.ENSP00000302621,9606.ENSP00000309474,…	APOH,UNC13D,HRG,APOB,APOA1,CAT,C3,ORM1,THBS1,VWF,LGALS3BP,A1BG,S100A11,FERMT3,APP,KPNB1,CAMP,LRG1,PSMD1,CLU,A2M,DYNC1H1,FCN1,XRCC5,PROS1,TF,PSMD14,SERPINA1,SERPINA3,PSMC3,SPTAN1,KNG1
GO	GO Component	GO:0034774	Secretory granule lumen	31	321	0.84	2.4e-14	9606.ENSP00000205948,9606.ENSP00000207549,9606.ENSP00000232003,9606.ENSP00000236850,9606.ENSP00000241052,9606.ENSP00000245907,9606.ENSP00000259396,9606.ENSP00000260356,9606.ENSP00000261405,9606.ENSP00000262776,9606.ENSP00000263100,9606.ENSP00000271638,9606.ENSP00000279227,9606.ENSP00000284981,9606.ENSP00000290158,9606.ENSP00000296435,9606.ENSP00000302621,9606.ENSP00000309474,9606.ENSP00000315130,…	APOH,UNC13D,HRG,APOA1,CAT,C3,ORM1,THBS1,VWF,LGALS3BP,A1BG,S100A11,FERMT3,APP,KPNB1,CAMP,LRG1,PSMD1,CLU,A2M,DYNC1H1,FCN1,XRCC5,PROS1,TF,PSMD14,SERPINA1,SERPINA3,PSMC3,SPTAN1,KNG1
GO	GO Component	GO:0042383	Sarcolemma	11	132	0.78	0.00016	9606.ENSP00000295550,9606.ENSP00000300527,9606.ENSP00000316779,9606.ENSP00000327145,9606.ENSP00000349320,9606.ENSP00000355124,9606.ENSP00000355180,9606.ENSP00000356790,9606.ENSP00000366109,9606.ENSP00000367263,9606.ENSP00000394496	COL6A3,COL6A2,BIN1,FLNC,CACNA2D1,KRT19,COL6A1,ATP1B1,ANXA1,AHNAK,CORO1C
GO	GO Component	GO:1903561	Extracellular vesicle	174	2120	0.77	5.85e-92	9606.ENSP00000167586,9606.ENSP00000200676,9606.ENSP00000205948,9606.ENSP00000212355,9606.ENSP00000215727,9606.ENSP00000217133,9606.ENSP00000217407,9606.ENSP00000218099,9606.ENSP00000222271,9606.ENSP00000222381,9606.ENSP00000222399,9606.ENSP00000223061,9606.ENSP00000223357,9606.ENSP00000223642,9606.ENSP00000225655,9606.ENSP00000226218,9606.ENSP00000226355,9606.ENSP00000227667,9606.ENSP00000230036,…	KRT14,CETP,APOH,TGFBR3,SERPIND1,TUBB1,LBP,F9,COMP,PON1,LAMB1,PCOLCE,AEBP1,C5,PFN1,VTN,AFM,APOC3,GPLD1,HRG,APOB,APOA1,CAT,PEPD,C3,KRT13,CANX,KRT5,KRT1,PLVAP,PXDN,BPIFB1,F12,APCS,LAMC1,ORM1,THBS1,VWF,AARS1,ITGA2B,SLC4A1,PRDX1,LGALS3BP,A1BG,C9,NID1,CP,PRDX5,HPX,LUM,IQGAP1,CDH11,KRT10,PGD,S100A11,ITIH1,ALDH1L1,FERMT3,APP,STOM,APPL1,KPNB1,FCN2,AZGP1,COL6A3,CAMP,C2,COL6A2,GLOD4,PRDX2,LRG1,HSPA4,TWF2,F2…
GO	GO Component	GO:0070062	Extracellular exosome	173	2096	0.77	5.85e-92	9606.ENSP00000167586,9606.ENSP00000200676,9606.ENSP00000205948,9606.ENSP00000212355,9606.ENSP00000215727,9606.ENSP00000217133,9606.ENSP00000217407,9606.ENSP00000218099,9606.ENSP00000222271,9606.ENSP00000222381,9606.ENSP00000222399,9606.ENSP00000223061,9606.ENSP00000223357,9606.ENSP00000223642,9606.ENSP00000225655,9606.ENSP00000226218,9606.ENSP00000226355,9606.ENSP00000227667,9606.ENSP00000230036,…	KRT14,CETP,APOH,TGFBR3,SERPIND1,TUBB1,LBP,F9,COMP,PON1,LAMB1,PCOLCE,AEBP1,C5,PFN1,VTN,AFM,APOC3,GPLD1,HRG,APOB,APOA1,CAT,PEPD,C3,KRT13,CANX,KRT5,KRT1,PLVAP,PXDN,BPIFB1,F12,APCS,LAMC1,ORM1,THBS1,VWF,AARS1,ITGA2B,SLC4A1,PRDX1,LGALS3BP,A1BG,C9,NID1,CP,PRDX5,HPX,LUM,IQGAP1,CDH11,KRT10,PGD,S100A11,ITIH1,ALDH1L1,FERMT3,APP,STOM,APPL1,KPNB1,FCN2,AZGP1,COL6A3,CAMP,C2,COL6A2,GLOD4,PRDX2,LRG1,HSPA4,TWF2,F2…
GO	GO Component	GO:1904813	ficolin-1-rich granule lumen	10	124	0.76	0.0005	9606.ENSP00000241052,9606.ENSP00000252244,9606.ENSP00000263100,9606.ENSP00000290158,9606.ENSP00000302621,9606.ENSP00000360871,9606.ENSP00000386541,9606.ENSP00000416066,9606.ENSP00000481029,9606.ENSP00000494175	CAT,KRT1,A1BG,KPNB1,LRG1,FCN1,PSMD14,SERPINA1,PSMC3,HBB
GO	GO Component	GO:0035580	Specific granule lumen	5	62	0.76	0.0421	9606.ENSP00000259396,9606.ENSP00000290158,9606.ENSP00000296435,9606.ENSP00000302621,9606.ENSP00000487444	ORM1,KPNB1,CAMP,LRG1,SPTAN1
GO	GO Component	GO:0005796	Golgi lumen	8	106	0.73	0.0047	9606.ENSP00000218099,9606.ENSP00000226218,9606.ENSP00000266718,9606.ENSP00000284981,9606.ENSP00000308541,9606.ENSP00000363827,9606.ENSP00000364709,9606.ENSP00000377783	F9,VTN,LUM,APP,F2,HSPG2,F10,PROS1
GO	GO Component	GO:0005882	Intermediate filament	15	207	0.72	1.92e-05	9606.ENSP00000167586,9606.ENSP00000246635,9606.ENSP00000252242,9606.ENSP00000252244,9606.ENSP00000269576,9606.ENSP00000310861,9606.ENSP00000329243,9606.ENSP00000342710,9606.ENSP00000355124,9606.ENSP00000357283,9606.ENSP00000369129,9606.ENSP00000369317,9606.ENSP00000373489,9606.ENSP00000446007,9606.ENSP00000474090	KRT14,KRT13,KRT5,KRT1,KRT10,KRT2,KRT7,KRT77,KRT19,LMNA,DSP,KRT6A,KRT18,VIM,UPP2
GO	GO Component	GO:0101002	ficolin-1-rich granule	13	185	0.7	0.00013	9606.ENSP00000241052,9606.ENSP00000252244,9606.ENSP00000257192,9606.ENSP00000263100,9606.ENSP00000290158,9606.ENSP00000302621,9606.ENSP00000360871,9606.ENSP00000369129,9606.ENSP00000372218,9606.ENSP00000386541,9606.ENSP00000416066,9606.ENSP00000481029,9606.ENSP00000494175	CAT,KRT1,DSG1,A1BG,KPNB1,LRG1,FCN1,DSP,SERPINB12,PSMD14,SERPINA1,PSMC3,HBB
GO	GO Component	GO:0042470	Melanosome	7	109	0.66	0.0249	9606.ENSP00000247461,9606.ENSP00000262746,9606.ENSP00000286713,9606.ENSP00000340466,9606.ENSP00000385385,9606.ENSP00000387286,9606.ENSP00000452786	CANX,PRDX1,STOM,GANAB,PDIA6,RAB1A,ITGB3
GO	GO Component	GO:0005615	Extracellular space	198	3247	0.64	2.64e-88	9606.ENSP00000167586,9606.ENSP00000200676,9606.ENSP00000205948,9606.ENSP00000212355,9606.ENSP00000215727,9606.ENSP00000217133,9606.ENSP00000217407,9606.ENSP00000218099,9606.ENSP00000222271,9606.ENSP00000222381,9606.ENSP00000222399,9606.ENSP00000223061,9606.ENSP00000223357,9606.ENSP00000223642,9606.ENSP00000225655,9606.ENSP00000226218,9606.ENSP00000226355,9606.ENSP00000227667,9606.ENSP00000230036,…	KRT14,CETP,APOH,TGFBR3,SERPIND1,TUBB1,LBP,F9,COMP,PON1,LAMB1,PCOLCE,AEBP1,C5,PFN1,VTN,AFM,APOC3,GPLD1,HRG,APOB,APOA1,CAT,PEPD,C3,KRT13,CANX,KRT5,KRT1,PLVAP,PXDN,BPIFB1,F12,APCS,LAMC1,ORM1,THBS1,VWF,AARS1,ITGA2B,SLC4A1,PRDX1,LGALS3BP,A1BG,C9,NID1,CP,TNC,PRDX5,HPX,LUM,IQGAP1,CDH11,KRT10,PGD,S100A11,ITIH1,ALDH1L1,HABP2,FERMT3,APP,STOM,APPL1,KPNB1,FCN2,AZGP1,COL6A3,CAMP,COL14A1,C2,COL6A2,GLOD4,PRDX2,…
GO	GO Component	GO:0030055	Cell-substrate junction	26	426	0.64	4.78e-08	9606.ENSP00000225655,9606.ENSP00000241052,9606.ENSP00000262407,9606.ENSP00000263025,9606.ENSP00000265131,9606.ENSP00000268182,9606.ENSP00000279227,9606.ENSP00000302486,9606.ENSP00000316029,9606.ENSP00000320866,9606.ENSP00000327116,9606.ENSP00000327145,9606.ENSP00000340211,9606.ENSP00000346088,9606.ENSP00000352438,9606.ENSP00000363827,9606.ENSP00000366109,9606.ENSP00000367263,9606.ENSP00000381581,…	PFN1,CAT,ITGA2B,MAPK3,TNC,IQGAP1,FERMT3,MAP2K1,TLN1,CALR,EHD3,FLNC,CORO1B,RPL22,PCBP2,HSPG2,ANXA1,AHNAK,LCP1,RPS14,PPP1R12A,CORO1C,PTPRC,FLNB,VIM,ITGB3
GO	GO Component	GO:0005925	Focal adhesion	25	416	0.64	1.31e-07	9606.ENSP00000225655,9606.ENSP00000241052,9606.ENSP00000262407,9606.ENSP00000263025,9606.ENSP00000265131,9606.ENSP00000268182,9606.ENSP00000302486,9606.ENSP00000316029,9606.ENSP00000320866,9606.ENSP00000327116,9606.ENSP00000327145,9606.ENSP00000340211,9606.ENSP00000346088,9606.ENSP00000352438,9606.ENSP00000363827,9606.ENSP00000366109,9606.ENSP00000367263,9606.ENSP00000381581,9606.ENSP00000385958,…	PFN1,CAT,ITGA2B,MAPK3,TNC,IQGAP1,MAP2K1,TLN1,CALR,EHD3,FLNC,CORO1B,RPL22,PCBP2,HSPG2,ANXA1,AHNAK,LCP1,RPS14,PPP1R12A,CORO1C,PTPRC,FLNB,VIM,ITGB3
GO	GO Component	GO:0070820	Tertiary granule	10	164	0.64	0.004	9606.ENSP00000257192,9606.ENSP00000259396,9606.ENSP00000286713,9606.ENSP00000296435,9606.ENSP00000302621,9606.ENSP00000369129,9606.ENSP00000372218,9606.ENSP00000373370,9606.ENSP00000487444,9606.ENSP00000494175	DSG1,ORM1,STOM,CAMP,LRG1,DSP,SERPINB12,FLG2,SPTAN1,HBB
GO	GO Component	GO:0030018	Z disc	8	131	0.64	0.0169	9606.ENSP00000262418,9606.ENSP00000279022,9606.ENSP00000316779,9606.ENSP00000327145,9606.ENSP00000355124,9606.ENSP00000389168,9606.ENSP00000420213,9606.ENSP00000467141	SLC4A1,MYL9,BIN1,FLNC,KRT19,PPP1R12A,FLNB,TTN
GO	GO Component	GO:0030141	Secretory granule	48	873	0.6	1.08e-13	9606.ENSP00000205948,9606.ENSP00000207549,9606.ENSP00000232003,9606.ENSP00000236850,9606.ENSP00000241052,9606.ENSP00000245907,9606.ENSP00000252244,9606.ENSP00000257192,9606.ENSP00000259396,9606.ENSP00000260356,9606.ENSP00000261405,9606.ENSP00000262407,9606.ENSP00000262776,9606.ENSP00000263100,9606.ENSP00000268182,9606.ENSP00000271638,9606.ENSP00000279227,9606.ENSP00000284981,9606.ENSP00000286713,…	APOH,UNC13D,HRG,APOA1,CAT,C3,KRT1,DSG1,ORM1,THBS1,VWF,ITGA2B,LGALS3BP,A1BG,IQGAP1,S100A11,FERMT3,APP,STOM,KPNB1,CAMP,LRG1,PSMD1,PAK2,CLU,CALR,A2M,SERPINA5,DYNC1H1,FCN1,DSP,SERPINB12,FLG2,GARS1,XRCC5,PROS1,PLA2G2A,TF,PSMD14,PTPRC,SERPINA1,SERPINA3,ITGB3,PSMC3,SPTAN1,KNG1,HBB,NOTCH1
GO	GO Component	GO:0030016	Myofibril	13	237	0.6	0.0013	9606.ENSP00000262418,9606.ENSP00000279022,9606.ENSP00000303908,9606.ENSP00000316779,9606.ENSP00000327145,9606.ENSP00000349259,9606.ENSP00000355124,9606.ENSP00000367263,9606.ENSP00000389168,9606.ENSP00000394496,9606.ENSP00000420213,9606.ENSP00000467141,9606.ENSP00000495530	SLC4A1,MYL9,TWF2,BIN1,FLNC,SPTBN1,KRT19,AHNAK,PPP1R12A,CORO1C,FLNB,TTN,ENO1
GO	GO Component	GO:0005576	Extracellular region	224	4175	0.59	2.27e-96	9606.ENSP00000167586,9606.ENSP00000200676,9606.ENSP00000205948,9606.ENSP00000207549,9606.ENSP00000212355,9606.ENSP00000215727,9606.ENSP00000217133,9606.ENSP00000217407,9606.ENSP00000218099,9606.ENSP00000222271,9606.ENSP00000222381,9606.ENSP00000222399,9606.ENSP00000223061,9606.ENSP00000223357,9606.ENSP00000223642,9606.ENSP00000225655,9606.ENSP00000226218,9606.ENSP00000226355,9606.ENSP00000227667,…	KRT14,CETP,APOH,UNC13D,TGFBR3,SERPIND1,TUBB1,LBP,F9,COMP,PON1,LAMB1,PCOLCE,AEBP1,C5,PFN1,VTN,AFM,APOC3,GPLD1,HRG,APOB,APOA1,CAT,PEPD,C3,KRT13,CANX,KRT5,KRT1,PLVAP,PXDN,BPIFB1,F12,MATN2,APCS,NOTCH2,LAMC1,ORM1,THBS1,VWF,AARS1,ITGA2B,SLC4A1,PRDX1,LGALS3BP,A1BG,NOTCH3,C9,NID1,CP,TNC,PRDX5,HPX,LUM,IQGAP1,CDH11,KRT10,PGD,S100A11,ITIH1,ALDH1L1,HABP2,FERMT3,APP,STOM,APPL1,KPNB1,FCN2,AZGP1,PKDCC,COL6A3,CA…
GO	GO Component	GO:0005775	Vacuolar lumen	9	175	0.57	0.0241	9606.ENSP00000207549,9606.ENSP00000233242,9606.ENSP00000245907,9606.ENSP00000266718,9606.ENSP00000309474,9606.ENSP00000348965,9606.ENSP00000363827,9606.ENSP00000421725,9606.ENSP00000450540	UNC13D,APOB,C3,LUM,PSMD1,DYNC1H1,HSPG2,GC,SERPINA3
GO	GO Component	GO:0031982	Vesicle	200	3957	0.56	2.84e-75	9606.ENSP00000167586,9606.ENSP00000200676,9606.ENSP00000205948,9606.ENSP00000207549,9606.ENSP00000212355,9606.ENSP00000215727,9606.ENSP00000217133,9606.ENSP00000217407,9606.ENSP00000218099,9606.ENSP00000222271,9606.ENSP00000222381,9606.ENSP00000222399,9606.ENSP00000223061,9606.ENSP00000223357,9606.ENSP00000223642,9606.ENSP00000225655,9606.ENSP00000226218,9606.ENSP00000226355,9606.ENSP00000227667,…	KRT14,CETP,APOH,UNC13D,TGFBR3,SERPIND1,TUBB1,LBP,F9,COMP,PON1,LAMB1,PCOLCE,AEBP1,C5,PFN1,VTN,AFM,APOC3,GPLD1,HRG,APOB,APOA1,CAT,PEPD,C3,KRT13,CANX,KRT5,KRT1,PLVAP,PXDN,BPIFB1,F12,APCS,DSG1,LAMC1,ORM1,THBS1,VWF,AARS1,ITGA2B,SLC4A1,PRDX1,LGALS3BP,MAPK3,A1BG,C9,NID1,CP,PRDX5,HPX,LUM,IQGAP1,CDH11,KRT10,PGD,S100A11,ITIH1,ALDH1L1,FERMT3,APP,STOM,APPL1,KPNB1,FCN2,AZGP1,COL6A3,CAMP,PRDX3,C2,COL6A2,GLOD4,…
GO	GO Component	GO:0030017	Sarcomere	11	217	0.56	0.0084	9606.ENSP00000262418,9606.ENSP00000279022,9606.ENSP00000316779,9606.ENSP00000327145,9606.ENSP00000349259,9606.ENSP00000355124,9606.ENSP00000389168,9606.ENSP00000394496,9606.ENSP00000420213,9606.ENSP00000467141,9606.ENSP00000495530	SLC4A1,MYL9,BIN1,FLNC,SPTBN1,KRT19,PPP1R12A,CORO1C,FLNB,TTN,ENO1
GO	GO Component	GO:0005938	Cell cortex	15	304	0.55	0.0011	9606.ENSP00000225655,9606.ENSP00000262418,9606.ENSP00000263710,9606.ENSP00000268182,9606.ENSP00000279022,9606.ENSP00000318195,9606.ENSP00000348965,9606.ENSP00000349259,9606.ENSP00000354791,9606.ENSP00000355124,9606.ENSP00000371798,9606.ENSP00000394496,9606.ENSP00000420213,9606.ENSP00000487444,9606.ENSP00000495530	PFN1,SLC4A1,CLASP1,IQGAP1,MYL9,NCL,DYNC1H1,SPTBN1,DCTN1,KRT19,FSCN1,CORO1C,FLNB,SPTAN1,ENO1
GO	GO Component	GO:0099503	Secretory vesicle	50	1047	0.54	4.62e-12	9606.ENSP00000205948,9606.ENSP00000207549,9606.ENSP00000232003,9606.ENSP00000236850,9606.ENSP00000241052,9606.ENSP00000245907,9606.ENSP00000252244,9606.ENSP00000257192,9606.ENSP00000259396,9606.ENSP00000260356,9606.ENSP00000261405,9606.ENSP00000262407,9606.ENSP00000262776,9606.ENSP00000263100,9606.ENSP00000268182,9606.ENSP00000271638,9606.ENSP00000279227,9606.ENSP00000284981,9606.ENSP00000286713,…	APOH,UNC13D,HRG,APOA1,CAT,C3,KRT1,DSG1,ORM1,THBS1,VWF,ITGA2B,LGALS3BP,A1BG,IQGAP1,S100A11,FERMT3,APP,STOM,KPNB1,CAMP,LRG1,PSMD1,PAK2,CLU,BIN1,CALR,A2M,SERPINA5,DYNC1H1,FCN1,DSP,SERPINB12,FLG2,GARS1,XRCC5,PROS1,PLA2G2A,TF,PSMD14,PTPRC,SERPINA1,SERPINA3,ITGB3,PTPRS,PSMC3,SPTAN1,KNG1,HBB,NOTCH1
GO	GO Component	GO:0009897	External side of plasma membrane	18	388	0.52	0.00044	9606.ENSP00000212355,9606.ENSP00000260356,9606.ENSP00000262407,9606.ENSP00000291744,9606.ENSP00000292401,9606.ENSP00000320866,9606.ENSP00000333203,9606.ENSP00000360871,9606.ENSP00000364709,9606.ENSP00000366109,9606.ENSP00000373539,9606.ENSP00000379140,9606.ENSP00000385834,9606.ENSP00000399376,9606.ENSP00000411355,9606.ENSP00000452786,9606.ENSP00000478893,9606.ENSP00000480035	TGFBR3,THBS1,ITGA2B,FCN2,AZGP1,CALR,SERPINA5,FCN1,F10,ANXA1,STAB2,CXCL12,TF,PRNP,PTPRC,ITGB3,IGHD,IGHV3-72
GO	GO Component	GO:0099512	Supramolecular fiber	45	1000	0.51	6.3e-10	9606.ENSP00000167586,9606.ENSP00000217133,9606.ENSP00000246635,9606.ENSP00000252242,9606.ENSP00000252244,9606.ENSP00000262418,9606.ENSP00000263710,9606.ENSP00000266718,9606.ENSP00000268182,9606.ENSP00000269576,9606.ENSP00000279022,9606.ENSP00000295550,9606.ENSP00000303908,9606.ENSP00000305699,9606.ENSP00000309953,9606.ENSP00000310861,9606.ENSP00000311905,9606.ENSP00000316779,9606.ENSP00000327145,…	KRT14,TUBB1,KRT13,KRT5,KRT1,SLC4A1,CLASP1,LUM,IQGAP1,KRT10,MYL9,COL6A3,TWF2,HOOK3,EFEMP2,KRT2,LTBP4,BIN1,FLNC,KRT7,CORO1B,KRT77,DNM3,DYNC1H1,SPTBN1,DCTN1,KRT19,COL6A1,LMNA,COL5A1,AHNAK,DSP,KRT6A,KRT18,LCP1,PSTPIP2,PPP1R12A,CORO1C,FLNB,FBN2,VIM,TTN,UPP2,HNRNPU,ENO1
GO	GO Component	GO:0015629	Actin cytoskeleton	19	482	0.45	0.0019	9606.ENSP00000263388,9606.ENSP00000268182,9606.ENSP00000279022,9606.ENSP00000279227,9606.ENSP00000303908,9606.ENSP00000316779,9606.ENSP00000336762,9606.ENSP00000340211,9606.ENSP00000349259,9606.ENSP00000355124,9606.ENSP00000367263,9606.ENSP00000371798,9606.ENSP00000381581,9606.ENSP00000387261,9606.ENSP00000389168,9606.ENSP00000394496,9606.ENSP00000420213,9606.ENSP00000467141,9606.ENSP00000487444	NOTCH3,IQGAP1,MYL9,FERMT3,TWF2,BIN1,ANG,CORO1B,SPTBN1,KRT19,AHNAK,FSCN1,LCP1,PSTPIP2,PPP1R12A,CORO1C,FLNB,TTN,SPTAN1
GO	GO Component	GO:0098978	Glutamatergic synapse	13	334	0.45	0.0243	9606.ENSP00000225655,9606.ENSP00000247461,9606.ENSP00000268603,9606.ENSP00000307549,9606.ENSP00000314067,9606.ENSP00000316779,9606.ENSP00000346088,9606.ENSP00000347457,9606.ENSP00000349259,9606.ENSP00000366513,9606.ENSP00000370593,9606.ENSP00000452786,9606.ENSP00000467537	PFN1,CANX,CDH11,NPTX1,PAK2,BIN1,RPL22,DNM3,SPTBN1,CLSTN1,PTPRD,ITGB3,PTPRS
GO	GO Component	GO:0009986	Cell surface	34	894	0.44	8.12e-06	9606.ENSP00000205948,9606.ENSP00000212355,9606.ENSP00000217407,9606.ENSP00000232003,9606.ENSP00000245907,9606.ENSP00000252590,9606.ENSP00000252804,9606.ENSP00000256646,9606.ENSP00000260356,9606.ENSP00000262407,9606.ENSP00000263388,9606.ENSP00000269576,9606.ENSP00000284981,9606.ENSP00000291744,9606.ENSP00000292401,9606.ENSP00000315130,9606.ENSP00000316029,9606.ENSP00000320866,9606.ENSP00000333203,…	APOH,TGFBR3,LBP,HRG,C3,PLVAP,PXDN,NOTCH2,THBS1,ITGA2B,NOTCH3,KRT10,APP,FCN2,AZGP1,CLU,TLN1,CALR,SERPINA5,FCN1,F10,ANXA1,CLSTN1,STAB2,CXCL12,TF,PRNP,PTPRC,ITGB3,IGHD,IGHV3-72,HNRNPU,ENO1,NOTCH1
GO	GO Component	GO:0098552	Side of membrane	23	611	0.43	0.00071	9606.ENSP00000212355,9606.ENSP00000247461,9606.ENSP00000257192,9606.ENSP00000260356,9606.ENSP00000262407,9606.ENSP00000262418,9606.ENSP00000268182,9606.ENSP00000291744,9606.ENSP00000292401,9606.ENSP00000312999,9606.ENSP00000320866,9606.ENSP00000333203,9606.ENSP00000360871,9606.ENSP00000364709,9606.ENSP00000366109,9606.ENSP00000373539,9606.ENSP00000379140,9606.ENSP00000385834,9606.ENSP00000399376,…	TGFBR3,CANX,DSG1,THBS1,ITGA2B,SLC4A1,IQGAP1,FCN2,AZGP1,GNAI2,CALR,SERPINA5,FCN1,F10,ANXA1,STAB2,CXCL12,TF,PRNP,PTPRC,ITGB3,IGHD,IGHV3-72
GO	GO Component	GO:0005769	Early endosome	15	411	0.42	0.0205	9606.ENSP00000227667,9606.ENSP00000233242,9606.ENSP00000236850,9606.ENSP00000263025,9606.ENSP00000284981,9606.ENSP00000288266,9606.ENSP00000298510,9606.ENSP00000302486,9606.ENSP00000327116,9606.ENSP00000360798,9606.ENSP00000366109,9606.ENSP00000385834,9606.ENSP00000387286,9606.ENSP00000466775,9606.ENSP00000498872	APOC3,APOB,APOA1,MAPK3,APP,APPL1,PRDX3,MAP2K1,EHD3,EPS15,ANXA1,TF,RAB1A,APOC2,SNX6
GO	GO Component	GO:0099080	Supramolecular complex	49	1366	0.41	9.02e-08	9606.ENSP00000167586,9606.ENSP00000217133,9606.ENSP00000246635,9606.ENSP00000252242,9606.ENSP00000252244,9606.ENSP00000262418,9606.ENSP00000263710,9606.ENSP00000266718,9606.ENSP00000268182,9606.ENSP00000269576,9606.ENSP00000279022,9606.ENSP00000290158,9606.ENSP00000295550,9606.ENSP00000303908,9606.ENSP00000305699,9606.ENSP00000309953,9606.ENSP00000310861,9606.ENSP00000311905,9606.ENSP00000316779,…	KRT14,TUBB1,KRT13,KRT5,KRT1,SLC4A1,CLASP1,LUM,IQGAP1,KRT10,MYL9,KPNB1,COL6A3,TWF2,HOOK3,EFEMP2,KRT2,LTBP4,BIN1,NCL,FLNC,KRT7,CORO1B,KRT77,DNM3,DYNC1H1,SPTBN1,DCTN1,KRT19,COL6A1,LMNA,COL5A1,AHNAK,DSP,KRT6A,KRT18,CARHSP1,LCP1,PSTPIP2,PPP1R12A,CORO1C,FLNB,FBN2,VIM,TTN,UPP2,PSMC3,HNRNPU,ENO1
GO	GO Component	GO:0099513	Polymeric cytoskeletal fiber	27	757	0.41	0.00037	9606.ENSP00000167586,9606.ENSP00000217133,9606.ENSP00000246635,9606.ENSP00000252242,9606.ENSP00000252244,9606.ENSP00000263710,9606.ENSP00000268182,9606.ENSP00000269576,9606.ENSP00000303908,9606.ENSP00000305699,9606.ENSP00000310861,9606.ENSP00000329243,9606.ENSP00000340211,9606.ENSP00000342710,9606.ENSP00000347457,9606.ENSP00000348965,9606.ENSP00000354791,9606.ENSP00000355124,9606.ENSP00000357283,…	KRT14,TUBB1,KRT13,KRT5,KRT1,CLASP1,IQGAP1,KRT10,TWF2,HOOK3,KRT2,KRT7,CORO1B,KRT77,DNM3,DYNC1H1,DCTN1,KRT19,LMNA,DSP,KRT6A,KRT18,LCP1,PSTPIP2,VIM,UPP2,HNRNPU
GO	GO Component	GO:0098797	Plasma membrane protein complex	20	589	0.39	0.0078	9606.ENSP00000212355,9606.ENSP00000223642,9606.ENSP00000226218,9606.ENSP00000262407,9606.ENSP00000263408,9606.ENSP00000268603,9606.ENSP00000312999,9606.ENSP00000322061,9606.ENSP00000349320,9606.ENSP00000354458,9606.ENSP00000356790,9606.ENSP00000360281,9606.ENSP00000360697,9606.ENSP00000360798,9606.ENSP00000363827,9606.ENSP00000367263,9606.ENSP00000385834,9606.ENSP00000394496,9606.ENSP00000444688,…	TGFBR3,C5,VTN,ITGA2B,C9,CDH11,GNAI2,C7,CACNA2D1,C8A,ATP1B1,C8B,C8G,EPS15,HSPG2,AHNAK,TF,CORO1C,ATP1A3,ITGB3
GO	GO Component	GO:0005911	Cell-cell junction	17	499	0.39	0.02	9606.ENSP00000257192,9606.ENSP00000258201,9606.ENSP00000268182,9606.ENSP00000268603,9606.ENSP00000271638,9606.ENSP00000284981,9606.ENSP00000314067,9606.ENSP00000316029,9606.ENSP00000356790,9606.ENSP00000362409,9606.ENSP00000366109,9606.ENSP00000367263,9606.ENSP00000369129,9606.ENSP00000371798,9606.ENSP00000373489,9606.ENSP00000452786,9606.ENSP00000498587	DSG1,FHOD1,IQGAP1,CDH11,S100A11,APP,PAK2,TLN1,ATP1B1,NIBAN2,ANXA1,AHNAK,DSP,FSCN1,KRT18,ITGB3,NOTCH1
GO	GO Component	GO:0031410	Cytoplasmic vesicle	77	2482	0.35	7.62e-10	9606.ENSP00000205948,9606.ENSP00000207549,9606.ENSP00000227667,9606.ENSP00000232003,9606.ENSP00000233242,9606.ENSP00000236850,9606.ENSP00000241052,9606.ENSP00000245907,9606.ENSP00000247461,9606.ENSP00000252244,9606.ENSP00000257192,9606.ENSP00000259396,9606.ENSP00000260356,9606.ENSP00000261405,9606.ENSP00000262407,9606.ENSP00000262746,9606.ENSP00000262776,9606.ENSP00000263025,9606.ENSP00000263100,…	APOH,UNC13D,APOC3,HRG,APOB,APOA1,CAT,C3,CANX,KRT1,DSG1,ORM1,THBS1,VWF,ITGA2B,PRDX1,LGALS3BP,MAPK3,A1BG,PRDX5,HPX,IQGAP1,S100A11,FERMT3,APP,STOM,APPL1,KPNB1,CAMP,PRDX3,MAP2K1,LRG1,NPTX1,PSMD1,STAB1,PAK2,CLU,BIN1,CALR,A2M,EHD3,SERPINA5,ANG,GANAB,DYNC1H1,EPS15,FCN1,ANXA1,CLSTN1,DSP,SERPINB12,FLG2,STAB2,GARS1,XRCC5,PROS1,SEC31A,PLA2G2A,PDIA6,TF,PSMD14,RAB1A,CORO1C,PTPRC,SERPINA1,FLNB,VIM,SERPINA3,ITG…
GO	GO Component	GO:0070161	Anchoring junction	41	1325	0.35	7.13e-05	9606.ENSP00000225655,9606.ENSP00000241052,9606.ENSP00000257192,9606.ENSP00000258201,9606.ENSP00000262407,9606.ENSP00000263025,9606.ENSP00000265131,9606.ENSP00000268182,9606.ENSP00000268603,9606.ENSP00000271638,9606.ENSP00000279227,9606.ENSP00000284981,9606.ENSP00000302486,9606.ENSP00000314067,9606.ENSP00000316029,9606.ENSP00000320866,9606.ENSP00000327116,9606.ENSP00000327145,9606.ENSP00000340211,…	PFN1,CAT,DSG1,FHOD1,ITGA2B,MAPK3,TNC,IQGAP1,CDH11,S100A11,FERMT3,APP,MAP2K1,PAK2,TLN1,CALR,EHD3,FLNC,CORO1B,RPL22,PCBP2,ATP1B1,NIBAN2,HSPG2,ANXA1,CLSTN1,AHNAK,DSP,FSCN1,KRT18,LCP1,RPS14,PPP1R12A,CORO1C,PTPRC,C4B,FLNB,VIM,ITGB3,PTPRS,NOTCH1
GO	GO Component	GO:0048471	Perinuclear region of cytoplasm	22	727	0.34	0.0171	9606.ENSP00000222399,9606.ENSP00000252590,9606.ENSP00000265462,9606.ENSP00000284981,9606.ENSP00000286713,9606.ENSP00000303908,9606.ENSP00000314067,9606.ENSP00000315130,9606.ENSP00000320866,9606.ENSP00000327116,9606.ENSP00000332073,9606.ENSP00000340211,9606.ENSP00000347457,9606.ENSP00000357283,9606.ENSP00000357362,9606.ENSP00000360034,9606.ENSP00000373489,9606.ENSP00000378721,9606.ENSP00000380070,…	LAMB1,PLVAP,PRDX5,APP,STOM,TWF2,PAK2,CLU,CALR,EHD3,MGAT1,CORO1B,DNM3,LMNA,THBS3,SERBP1,KRT18,SEC31A,GAPDH,LCP1,PLA2G2A,TF
GO	GO Component	GO:0005764	Lysosome	21	746	0.31	0.0409	9606.ENSP00000207549,9606.ENSP00000229268,9606.ENSP00000230036,9606.ENSP00000232003,9606.ENSP00000233242,9606.ENSP00000241052,9606.ENSP00000245907,9606.ENSP00000264613,9606.ENSP00000266718,9606.ENSP00000286713,9606.ENSP00000309474,9606.ENSP00000320866,9606.ENSP00000348965,9606.ENSP00000355180,9606.ENSP00000363827,9606.ENSP00000367263,9606.ENSP00000381293,9606.ENSP00000387654,9606.ENSP00000421725,…	UNC13D,USP5,GPLD1,HRG,APOB,CAT,C3,CP,LUM,STOM,PSMD1,CALR,DYNC1H1,COL6A1,HSPG2,AHNAK,NSF,PCYOX1,GC,SERPINA3,SNX6
GO	GO Component	GO:0071944	Cell periphery	166	6015	0.3	4e-22	9606.ENSP00000012443,9606.ENSP00000205948,9606.ENSP00000212355,9606.ENSP00000218099,9606.ENSP00000222271,9606.ENSP00000222399,9606.ENSP00000223357,9606.ENSP00000223642,9606.ENSP00000225655,9606.ENSP00000226218,9606.ENSP00000227667,9606.ENSP00000230036,9606.ENSP00000232003,9606.ENSP00000233242,9606.ENSP00000236850,9606.ENSP00000241052,9606.ENSP00000245907,9606.ENSP00000247461,9606.ENSP00000252244,…	PPP5C,APOH,TGFBR3,F9,COMP,LAMB1,AEBP1,C5,PFN1,VTN,APOC3,GPLD1,HRG,APOB,APOA1,CAT,C3,CANX,KRT1,PLVAP,PXDN,F12,MATN2,APCS,NOTCH2,DSG1,LAMC1,ORM1,THBS1,VWF,ITGA2B,SLC4A1,LGALS3BP,MAPK3,A1BG,NOTCH3,C9,CLASP1,NID1,CP,TNC,HPX,LUM,IQGAP1,CDH11,KRT10,ITIH1,MYL9,APP,STOM,APPL1,FCN2,AZGP1,COL6A3,COL14A1,C2,COL6A2,MAP2K1,NPTX1,F2,SNED1,EFEMP2,KRT2,LTBP4,STAB1,GNAI2,C1QB,PAK2,CLU,TLN1,BIN1,NCL,CPN2,IGDCC4,CA…
GO	GO Component	GO:0005783	Endoplasmic reticulum	56	2021	0.3	2.27e-05	9606.ENSP00000215727,9606.ENSP00000218099,9606.ENSP00000222399,9606.ENSP00000226218,9606.ENSP00000233242,9606.ENSP00000236850,9606.ENSP00000241052,9606.ENSP00000245907,9606.ENSP00000247461,9606.ENSP00000252804,9606.ENSP00000253496,9606.ENSP00000256646,9606.ENSP00000258341,9606.ENSP00000260356,9606.ENSP00000261405,9606.ENSP00000263025,9606.ENSP00000263388,9606.ENSP00000264613,9606.ENSP00000265131,…	SERPIND1,F9,LAMB1,VTN,APOB,APOA1,CAT,C3,CANX,PXDN,F12,NOTCH2,LAMC1,THBS1,VWF,MAPK3,NOTCH3,CP,TNC,APP,STOM,KPNB1,COL6A3,COL14A1,COL6A2,MAP2K1,F2,CLU,APOL1,CALR,COL12A1,GANAB,CACNA2D1,ITIH2,COL18A1,COL6A1,ADAMTSL4,COL5A1,MINPP1,ATF6B,F10,MAMDC2,CLSTN1,PROS1,SEC31A,PLA2G2A,MATN3,PDIA6,TF,RAB1A,TKT,PRNP,SERPINA1,ATP1A3,KNG1,NOTCH1
GO	GO Component	GO:0030054	Cell junction	56	2115	0.28	8.83e-05	9606.ENSP00000225655,9606.ENSP00000241052,9606.ENSP00000247461,9606.ENSP00000257192,9606.ENSP00000258201,9606.ENSP00000262407,9606.ENSP00000263025,9606.ENSP00000265131,9606.ENSP00000268182,9606.ENSP00000268603,9606.ENSP00000271638,9606.ENSP00000279227,9606.ENSP00000284981,9606.ENSP00000302486,9606.ENSP00000307549,9606.ENSP00000312999,9606.ENSP00000313967,9606.ENSP00000314067,9606.ENSP00000315130,…	PFN1,CAT,CANX,DSG1,FHOD1,ITGA2B,MAPK3,TNC,IQGAP1,CDH11,S100A11,FERMT3,APP,MAP2K1,NPTX1,GNAI2,C1QB,PAK2,CLU,TLN1,BIN1,CALR,EHD3,FLNC,CORO1B,RPL22,DNM3,SPTBN1,PCBP2,ATP1B1,NIBAN2,C1QC,HSPG2,ANXA1,CLSTN1,AHNAK,RPS6KA3,DSP,PTPRD,FSCN1,KRT18,NSF,LCP1,RPS14,PPP1R12A,CORO1C,PRNP,PTPRC,C4B,FLNB,ATP1A3,VIM,ITGB3,PTPRS,SPTAN1,NOTCH1
GO	GO Component	GO:0012505	Endomembrane system	115	4721	0.24	3.88e-09	9606.ENSP00000205948,9606.ENSP00000207549,9606.ENSP00000215727,9606.ENSP00000218099,9606.ENSP00000222399,9606.ENSP00000226218,9606.ENSP00000227667,9606.ENSP00000232003,9606.ENSP00000233242,9606.ENSP00000236850,9606.ENSP00000241052,9606.ENSP00000245907,9606.ENSP00000247461,9606.ENSP00000252244,9606.ENSP00000252804,9606.ENSP00000253496,9606.ENSP00000256646,9606.ENSP00000257192,9606.ENSP00000258341,…	APOH,UNC13D,SERPIND1,F9,LAMB1,VTN,APOC3,HRG,APOB,APOA1,CAT,C3,CANX,KRT1,PXDN,F12,NOTCH2,DSG1,LAMC1,ORM1,THBS1,VWF,ITGA2B,LGALS3BP,MAPK3,A1BG,NOTCH3,CLASP1,CP,TNC,LUM,IQGAP1,S100A11,FERMT3,APP,STOM,APPL1,KPNB1,PKDCC,COL6A3,CAMP,COL14A1,PRDX3,COL6A2,MAP2K1,LRG1,HOOK3,NPTX1,F2,PSMD1,PAK2,CLU,BIN1,APOL1,CALR,A2M,COL12A1,EHD3,MGAT1,SERPINA5,GANAB,DNM3,DYNC1H1,CACNA2D1,ITIH2,COL18A1,DCTN1,COL6A1,LMNA,A…
GO	GO Component	GO:0005829	Cytosol	126	5438	0.22	6.07e-09	9606.ENSP00000012443,9606.ENSP00000167586,9606.ENSP00000207549,9606.ENSP00000225655,9606.ENSP00000229268,9606.ENSP00000233242,9606.ENSP00000236850,9606.ENSP00000241052,9606.ENSP00000246337,9606.ENSP00000246635,9606.ENSP00000252242,9606.ENSP00000252244,9606.ENSP00000253382,9606.ENSP00000257192,9606.ENSP00000258201,9606.ENSP00000261772,9606.ENSP00000262306,9606.ENSP00000262746,9606.ENSP00000263025,…	PPP5C,KRT14,UNC13D,PFN1,USP5,APOB,APOA1,CAT,UROD,KRT13,KRT5,KRT1,ACSS2,DSG1,FHOD1,AARS1,ELOB,PRDX1,MAPK3,NOTCH3,CLASP1,PRDX5,IQGAP1,KRT10,PGD,ALDH1L1,MYL9,APP,APPL1,KPNB1,PRDX3,PRDX2,MAP2K1,HSPA4,HOOK3,PSMD1,KRT2,OXSR1,GNAI2,PAK2,CLU,TLN1,BIN1,CALR,HMGCS1,EHD3,FLNC,KRT7,ANG,UBA1,PKLR,CORO1B,KRT77,RPL22,DYNC1H1,SPTBN1,GFPT1,CNDP1,NAE1,PCBP2,DCTN1,KRT19,FH,AGT,ACAT2,NIBAN1,LMNA,SERBP1,EPS15,NIBAN2,…
GO	GO Component	GO:0032991	Protein-containing complex	121	5506	0.2	4.76e-07	9606.ENSP00000012443,9606.ENSP00000200676,9606.ENSP00000205948,9606.ENSP00000212355,9606.ENSP00000218099,9606.ENSP00000222271,9606.ENSP00000222381,9606.ENSP00000222399,9606.ENSP00000223642,9606.ENSP00000226218,9606.ENSP00000227667,9606.ENSP00000233242,9606.ENSP00000236850,9606.ENSP00000241052,9606.ENSP00000245907,9606.ENSP00000247461,9606.ENSP00000253496,9606.ENSP00000256646,9606.ENSP00000258341,…	PPP5C,CETP,APOH,TGFBR3,F9,COMP,PON1,LAMB1,C5,VTN,APOC3,APOB,APOA1,CAT,C3,CANX,F12,NOTCH2,LAMC1,THBS1,ELOB,ITGA2B,NOTCH3,C9,NID1,TNC,LUM,IQGAP1,CDH11,MYL9,APP,KPNB1,FCN2,COL6A3,COL14A1,PRDX3,C2,COL6A2,HOOK3,F2,PSMD1,GNAI2,C1QB,CLU,BIN1,APOL1,NCL,CALR,C7,COL12A1,SERPINA5,ANG,GANAB,RPL22,DNM3,DYNC1H1,SPTBN1,CACNA2D1,NAE1,COL18A1,C8A,DCTN1,COL6A1,FH,CFH,ATP1B1,C8B,C8G,EPS15,FCN1,COL5A1,C1QC,HSPG2,ATF…
GO	GO Component	GO:0005856	Cytoskeleton	51	2369	0.19	0.0249	9606.ENSP00000167586,9606.ENSP00000217133,9606.ENSP00000225655,9606.ENSP00000246635,9606.ENSP00000252242,9606.ENSP00000252244,9606.ENSP00000258201,9606.ENSP00000262418,9606.ENSP00000263025,9606.ENSP00000263388,9606.ENSP00000263710,9606.ENSP00000268182,9606.ENSP00000269576,9606.ENSP00000279022,9606.ENSP00000279227,9606.ENSP00000284981,9606.ENSP00000286713,9606.ENSP00000302486,9606.ENSP00000303908,…	KRT14,TUBB1,PFN1,KRT13,KRT5,KRT1,FHOD1,SLC4A1,MAPK3,NOTCH3,CLASP1,IQGAP1,KRT10,MYL9,FERMT3,APP,STOM,MAP2K1,TWF2,HOOK3,KRT2,GNAI2,TLN1,BIN1,FLNC,KRT7,ANG,CORO1B,KRT77,DNM3,DYNC1H1,SPTBN1,DCTN1,KRT19,LMNA,AHNAK,DSP,KRT6A,FSCN1,KRT18,GAPDH,LCP1,PSTPIP2,PPP1R12A,CORO1C,FLNB,VIM,TTN,UPP2,SPTAN1,HNRNPU
GO	GO Component	GO:0005886	Plasma membrane	112	5544	0.16	0.00016	9606.ENSP00000012443,9606.ENSP00000212355,9606.ENSP00000218099,9606.ENSP00000223642,9606.ENSP00000226218,9606.ENSP00000232003,9606.ENSP00000233242,9606.ENSP00000236850,9606.ENSP00000241052,9606.ENSP00000245907,9606.ENSP00000247461,9606.ENSP00000252244,9606.ENSP00000252590,9606.ENSP00000253496,9606.ENSP00000256646,9606.ENSP00000257192,9606.ENSP00000260356,9606.ENSP00000262407,9606.ENSP00000262418,…	PPP5C,TGFBR3,F9,C5,VTN,HRG,APOB,APOA1,CAT,C3,CANX,KRT1,PLVAP,F12,NOTCH2,DSG1,THBS1,ITGA2B,SLC4A1,MAPK3,NOTCH3,C9,NID1,CP,IQGAP1,CDH11,KRT10,APP,STOM,APPL1,FCN2,AZGP1,COL6A3,C2,COL6A2,MAP2K1,NPTX1,F2,KRT2,STAB1,GNAI2,PAK2,TLN1,BIN1,NCL,IGDCC4,CALR,C7,EHD3,FLNC,SERPINA5,CORO1B,KRT77,DNM3,SPTBN1,CACNA2D1,NAE1,C8A,KRT19,COL6A1,NIBAN1,ATP1B1,C8B,C8G,EPS15,FCN1,NIBAN2,HSPG2,F10,ANXA1,CLSTN1,AHNAK,DSP,P…
GO	GO Component	GO:0043227	Membrane-bounded organelle	234	13188	0.11	3.37e-10	9606.ENSP00000012443,9606.ENSP00000167586,9606.ENSP00000200676,9606.ENSP00000205948,9606.ENSP00000207549,9606.ENSP00000212355,9606.ENSP00000215727,9606.ENSP00000217133,9606.ENSP00000217407,9606.ENSP00000218099,9606.ENSP00000222271,9606.ENSP00000222381,9606.ENSP00000222399,9606.ENSP00000223061,9606.ENSP00000223357,9606.ENSP00000223642,9606.ENSP00000225655,9606.ENSP00000226218,9606.ENSP00000226355,…	PPP5C,KRT14,CETP,APOH,UNC13D,TGFBR3,SERPIND1,TUBB1,LBP,F9,COMP,PON1,LAMB1,PCOLCE,AEBP1,C5,PFN1,VTN,AFM,APOC3,USP5,GPLD1,HRG,APOB,APOA1,CAT,PEPD,C3,UROD,KRT13,CANX,KRT5,KRT1,PLVAP,PXDN,BPIFB1,ACSS2,F12,APCS,NOTCH2,DSG1,FHOD1,LAMC1,ORM1,THBS1,VWF,AARS1,ELOB,ITGA2B,SLC4A1,PRDX1,LGALS3BP,MAPK3,A1BG,NOTCH3,C9,CLASP1,NID1,CP,TNC,PRDX5,HPX,LUM,IQGAP1,CDH11,KRT10,PGD,S100A11,ITIH1,ALDH1L1,FERMT3,APP,STOM…
GO	GO Component	GO:0005737	Cytoplasm	218	12056	0.11	4.82e-09	9606.ENSP00000012443,9606.ENSP00000167586,9606.ENSP00000205948,9606.ENSP00000207549,9606.ENSP00000212355,9606.ENSP00000215727,9606.ENSP00000217133,9606.ENSP00000218099,9606.ENSP00000222399,9606.ENSP00000223357,9606.ENSP00000225655,9606.ENSP00000226218,9606.ENSP00000226355,9606.ENSP00000227667,9606.ENSP00000229268,9606.ENSP00000230036,9606.ENSP00000232003,9606.ENSP00000233242,9606.ENSP00000236850,…	PPP5C,KRT14,APOH,UNC13D,TGFBR3,SERPIND1,TUBB1,F9,LAMB1,AEBP1,PFN1,VTN,AFM,APOC3,USP5,GPLD1,HRG,APOB,APOA1,CAT,C3,UROD,KRT13,CANX,KRT5,KRT1,PLVAP,PXDN,ACSS2,F12,NOTCH2,DSG1,FHOD1,LAMC1,ORM1,THBS1,VWF,AARS1,ELOB,ITGA2B,SLC4A1,PRDX1,LGALS3BP,MAPK3,A1BG,NOTCH3,CLASP1,CP,TNC,PRDX5,HPX,LUM,IQGAP1,CDH11,KRT10,PGD,S100A11,ALDH1L1,MYL9,FERMT3,APP,STOM,APPL1,KPNB1,PKDCC,COL6A3,CAMP,COL14A1,PRDX3,COL6A2,GLO…
GO	GO Component	GO:0070013	Intracellular organelle lumen	102	5660	0.11	0.0327	9606.ENSP00000012443,9606.ENSP00000205948,9606.ENSP00000207549,9606.ENSP00000215727,9606.ENSP00000218099,9606.ENSP00000222399,9606.ENSP00000226218,9606.ENSP00000232003,9606.ENSP00000233242,9606.ENSP00000236850,9606.ENSP00000241052,9606.ENSP00000245907,9606.ENSP00000246337,9606.ENSP00000247461,9606.ENSP00000252244,9606.ENSP00000253382,9606.ENSP00000256646,9606.ENSP00000258201,9606.ENSP00000258341,…	PPP5C,APOH,UNC13D,SERPIND1,F9,LAMB1,VTN,HRG,APOB,APOA1,CAT,C3,UROD,CANX,KRT1,ACSS2,NOTCH2,FHOD1,LAMC1,ORM1,THBS1,VWF,ELOB,LGALS3BP,MAPK3,A1BG,NOTCH3,CP,TNC,PRDX5,HPX,LUM,S100A11,FERMT3,APP,KPNB1,COL6A3,CAMP,COL14A1,PRDX3,COL6A2,LRG1,F2,PSMD1,GNAI2,CLU,APOL1,NCL,CALR,A2M,COL12A1,ANG,UBA1,GANAB,DYNC1H1,SPTBN1,ITIH2,PCBP2,COL18A1,COL6A1,FH,LMNA,ADAMTSL4,FUBP1,FCN1,COL5A1,MINPP1,NIBAN2,HSPG2,F10,ANXA…
GO	GO Component	GO:0043226	Organelle	239	14017	0.09	1.5e-08	9606.ENSP00000012443,9606.ENSP00000167586,9606.ENSP00000200676,9606.ENSP00000205948,9606.ENSP00000207549,9606.ENSP00000212355,9606.ENSP00000215727,9606.ENSP00000217133,9606.ENSP00000217407,9606.ENSP00000218099,9606.ENSP00000222271,9606.ENSP00000222381,9606.ENSP00000222399,9606.ENSP00000223061,9606.ENSP00000223357,9606.ENSP00000223642,9606.ENSP00000225655,9606.ENSP00000226218,9606.ENSP00000226355,…	PPP5C,KRT14,CETP,APOH,UNC13D,TGFBR3,SERPIND1,TUBB1,LBP,F9,COMP,PON1,LAMB1,PCOLCE,AEBP1,C5,PFN1,VTN,AFM,APOC3,USP5,GPLD1,HRG,APOB,APOA1,CAT,PEPD,C3,UROD,KRT13,CANX,KRT5,KRT1,PLVAP,PXDN,BPIFB1,ACSS2,F12,APCS,NOTCH2,DSG1,FHOD1,LAMC1,ORM1,THBS1,VWF,AARS1,ELOB,ITGA2B,SLC4A1,PRDX1,LGALS3BP,MAPK3,A1BG,NOTCH3,C9,CLASP1,NID1,CP,TNC,PRDX5,HPX,LUM,IQGAP1,CDH11,KRT10,PGD,S100A11,ITIH1,ALDH1L1,MYL9,FERMT3,APP…
GO	GO Component	GO:0016020	Membrane	159	9523	0.08	0.0209	9606.ENSP00000012443,9606.ENSP00000207549,9606.ENSP00000212355,9606.ENSP00000217407,9606.ENSP00000218099,9606.ENSP00000222399,9606.ENSP00000223642,9606.ENSP00000225655,9606.ENSP00000226218,9606.ENSP00000230036,9606.ENSP00000232003,9606.ENSP00000233242,9606.ENSP00000236850,9606.ENSP00000241052,9606.ENSP00000245907,9606.ENSP00000247461,9606.ENSP00000252242,9606.ENSP00000252244,9606.ENSP00000252590,…	PPP5C,UNC13D,TGFBR3,LBP,F9,LAMB1,C5,PFN1,VTN,GPLD1,HRG,APOB,APOA1,CAT,C3,CANX,KRT5,KRT1,PLVAP,F12,NOTCH2,DSG1,FHOD1,THBS1,AARS1,ITGA2B,SLC4A1,LGALS3BP,MAPK3,NOTCH3,C9,CLASP1,NID1,CP,TNC,IQGAP1,CDH11,KRT10,FERMT3,APP,STOM,APPL1,KPNB1,FCN2,AZGP1,COL6A3,C2,COL6A2,MAP2K1,LRG1,NPTX1,F2,PSMD1,KRT2,STAB1,GNAI2,PAK2,CLU,TLN1,BIN1,APOL1,NCL,IGDCC4,CALR,C7,EHD3,FLNC,HHIPL1,MGAT1,SERPINA5,CORO1B,GANAB,KRT77…
GO	GO Component	GO:0110165	Cellular anatomical entity	273	18293	0.03	1.73e-06	9606.ENSP00000012443,9606.ENSP00000167586,9606.ENSP00000200676,9606.ENSP00000205948,9606.ENSP00000207549,9606.ENSP00000212355,9606.ENSP00000215727,9606.ENSP00000217133,9606.ENSP00000217407,9606.ENSP00000218099,9606.ENSP00000222271,9606.ENSP00000222381,9606.ENSP00000222399,9606.ENSP00000223061,9606.ENSP00000223357,9606.ENSP00000223642,9606.ENSP00000225655,9606.ENSP00000226218,9606.ENSP00000226355,…	PPP5C,KRT14,CETP,APOH,UNC13D,TGFBR3,SERPIND1,TUBB1,LBP,F9,COMP,PON1,LAMB1,PCOLCE,AEBP1,C5,PFN1,VTN,AFM,APOC3,USP5,GPLD1,HRG,APOB,APOA1,CAT,PEPD,C3,UROD,KRT13,CANX,KRT5,KRT1,PLVAP,PXDN,BPIFB1,ACSS2,F12,MATN2,APCS,NOTCH2,DSG1,FHOD1,LAMC1,ORM1,THBS1,VWF,AARS1,ELOB,ITGA2B,SLC4A1,PRDX1,LGALS3BP,MAPK3,A1BG,NOTCH3,C9,CLASP1,NID1,CP,TNC,PRDX5,HPX,LUM,IQGAP1,CDH11,KRT10,PGD,S100A11,ITIH1,ALDH1L1,HABP2,MYL…
